# Supplementary material
Source: PubMed Central journal article supplement (PMC4074173)
Supplement: NIHMS584158-supplement-Supplemebntary_table.pdf [file NIHMS584158-supplement-Supplemebntary_table.pdf]

Table S1 - Smith-Kinnaman, *et al* (2014) Abbreviations: %SC = percent sequence coverage, UP = unique peptides, PSM = peptide spectrum matches

| Accession | Acronym | NP_value    | %SC          | UP           | # PSM        | %SC          |
|-----------|---------|-------------|--------------|--------------|--------------|--------------|--------------|--------------|--------------|--------------|--------------|--------------|--------------|--------------|--------------|
|           |         |             | BY4741_TAP_1 | BY4741_TAP_1 | BY4741_TAP_1 | BY4741_TAP_2 |
| 398364847 | RTR1    | NP_011066.3 | 0            | 0            | 0            | 0            | 0            | 0            | 0            | 0            | 0            | 0            | 0            | 0            | 8.85         |
| 6320061   | RPB1    | NP_010141.1 | 7.67         | 12           | 17           | 0            | 0            | 0            | 3.23         | 5            | 16           | 1.04         | 1            | 2            | 3.98         |
| 398365417 | RPB2    | NP_014794.3 | 6.05         | 7            | 8            | 1.14         | 1            | 2            | 2.45         | 2            | 5            | 2.70         | 3            | 7            | 3.02         |
| 398364469 | RPB3    | NP_012243.3 | 0            | 0            | 0            | 0            | 0            | 0            | 0            | 0            | 0            | 0            | 0            | 0            | 5.35         |
| 6322321   | RPB4    | NP_012395.1 | 8.60         | 2            | 2            | 0            | 0            | 0            | 0            | 0            | 0            | 0            | 0            | 0            | 0            |
| 6319630   | RPB5    | NP_009712.1 | 6.98         | 1            | 1            | 0            | 0            | 0            | 0            | 0            | 0            | 0            | 0            | 0            | 13.02        |
| 398366567 | RPB7    | NP_010692.3 | 0            | 0            | 0            | 0            | 0            | 0            | 0            | 0            | 0            | 0            | 0            | 0            | 0            |
| 398365775 | RPB10   | NP_014853.3 | 0            | 0            | 0            | 0            | 0            | 0            | 0            | 0            | 0            | 37.14        | 1            | 1            | 0            |
| 6325445   | RPB6    | NP_015513.1 | 0            | 0            | 0            | 0            | 0            | 0            | 0            | 0            | 0            | 0            | 0            | 0            | 0            |
| 6321368   | RPB9    | NP_011445.1 | 8.20         | 1            | 2            | 8.20         | 1            | 1            | 0            | 0            | 0            | 0            | 0            | 0            | 0            |
| 6324798   | RPB8    | NP_014867.1 | 0            | 0            | 0            | 0            | 0            | 0            | 0            | 0            | 0            | 0            | 0            | 0            | 0            |
| 6324569   | RPB11   | NP_014638.1 | 0            | 0            | 0            | 0            | 0            | 0            | 0            | 0            | 0            | 0            | 0            | 0            | 0            |
| 6323632   | SPT5    | NP_013703.1 | 6.30         | 5            | 11           | 0            | 0            | 0            | 2.54         | 2            | 2            | 0            | 0            | 0            | 8.94         |
| 6321625   | TFG1    | NP_011702.1 | 3.27         | 2            | 4            | 0            | 0            | 0            | 0            | 0            | 0            | 0            | 0            | 0            | 1.36         |
| 6321937   | RPB12   | NP_012013.1 | 38.57        | 2            | 2            | 0            | 0            | 0            | 0            | 0            | 0            | 0            | 0            | 0            | 0            |
| 398365043 | TFG2    | NP_011519.3 | 5.00         | 2            | 2            | 0            | 0            | 0            | 0            | 0            | 0            | 0            | 0            | 0            | 2.00         |
| 154199603 | IWR1    | NP_010168.4 | 0            | 0            | 0            | 0            | 0            | 0            | 0            | 0            | 0            | 0            | 0            | 0            | 0            |
| 398365457 | SPT4    | NP_011577.3 | 0            | 0            | 0            | 0            | 0            | 0            | 0            | 0            | 0            | 0            | 0            | 0            | 0            |
| 6325128   | TAF14   | NP_015196.1 | 6.56         | 1            | 4            | 0            | 0            | 0            | 0            | 0            | 0            | 0            | 0            | 0            | 6.56         |
| 398365155 | NPA3    | NP_012606.3 | 11.95        | 4            | 8            | 0            | 0            | 0            | 0            | 0            | 0            | 0            | 0            | 0            | 8.83         |
| 6323272   | GPN3    | NP_013344.1 | 4.78         | 1            | 2            | 0            | 0            | 0            | 0            | 0            | 0            | 0            | 0            | 0            | 0            |
| 6322163   | IRR1    | NP_012238.1 | 0            | 0            | 0            | 0            | 0            | 0            | 1.04         | 1            | 1            | 0            | 0            | 0            | 0            |
| 398366099 | RRP41   | NP_011711.3 | 0            | 0            | 0            | 0            | 0            | 0            | 0            | 0            | 0            | 0            | 0            | 0            | 0            |
| 398366555 | UBA2    | NP_010678.3 | 0            | 0            | 0            | 0            | 0            | 0            | 0            | 0            | 0            | 0            | 0            | 0            | 2.20         |
| 6323670   | TAP42   | NP_013741.1 | 3.55         | 1            | 1            | 0            | 0            | 0            | 0            | 0            | 0            | 0            | 0            | 0            | 7.65         |
| 6323004   | SSA2    | NP_013076.1 | 57.90        | 38           | 914          | 24.57        | 10           | 28           | 12.21        | 6            | 72           | 31.46        | 14           | 134          | 56.65        |
| 6319505   | RPL4A   | NP_009587.1 | 45.30        | 15           | 225          | 19.89        | 6            | 26           | 12.43        | 3            | 60           | 44.20        | 11           | 360          | 37.02        |
| 398364991 | RPL4B   | NP_010295.3 | 44.75        | 14           | 218          | 19.89        | 6            | 26           | 12.43        | 3            | 60           | 0            | 0            | 0            | 0            |
| 398365303 | RPL43B  | NP_012628.3 | 63.04        | 7            | 386          | 29.35        | 2            | 21           | 0            | 0            | 0            | 29.35        | 2            | 15           | 43.48        |
| 398364349 | RPL2A   | NP_116688.3 | 60.24        | 14           | 523          | 4.33         | 1            | 2            | 4.33         | 1            | 1            | 24.02        | 4            | 128          | 27.17        |
| 6325337   | TEF1    | NP_015405.1 | 29.26        | 13           | 270          | 7.64         | 4            | 8            | 7.21         | 4            | 47           | 41.92        | 18           | 593          | 44.10        |
| 144228166 | SSA1    | NP_009396.2 | 57.48        | 37           | 875          | 20.87        | 9            | 29           | 8.26         | 4            | 45           | 31.31        | 14           | 135          | 57.79        |
| 6319559   | RPL19A  | NP_009641.1 | 31.22        | 8            | 413          | 20.63        | 6            | 18           | 6.35         | 3            | 54           | 15.34        | 3            | 73           | 29.63        |
| 6320065   | RPL35A  | NP_010145.1 | 39.17        | 6            | 40           | 34.17        | 4            | 25           | 7.50         | 1            | 1            | 0            | 0            | 0            | 30.83        |
| 398365603 | RPS4A   | NP_012679.3 | 43.30        | 15           | 97           | 19.54        | 4            | 9            | 7.28         | 2            | 82           | 30.27        | 8            | 18           | 32.57        |
| 398365321 | RPS6B   | NP_009740.3 | 30.51        | 6            | 86           | 19.92        | 5            | 22           | 21.61        | 4            | 148          | 23.73        | 4            | 39           | 33.90        |
| 398364655 | SSA4    | NP_011029.3 | 17.45        | 13           | 222          | 7.79         | 3            | 3            | 1.87         | 1            | 1            | 10.44        | 4            | 56           | 28.19        |

Table S1 - Smith-Kinnaman, *et al* (2014) Abbreviations: %SC = percent sequence coverage, UP = unique peptides, PSM = peptide spectrum matches

| Accession | Acronym | NP_value    | %SC          | UP           | # PSM        | %SC          |
|-----------|---------|-------------|--------------|--------------|--------------|--------------|--------------|--------------|--------------|--------------|--------------|--------------|--------------|--------------|--------------|
|           |         |             | BY4741_TAP_1 | BY4741_TAP_1 | BY4741_TAP_1 | BY4741_TAP_2 |
| 398366603 | RPS17B  | NP_010735.3 | 54.41        | 8            | 129          | 53.68        | 7            | 28           | 11.76        | 1            | 19           | 22.06        | 2            | 5            | 52.94        |
| 6324533   | RPS15   | NP_014602.1 | 16.90        | 2            | 22           | 21.13        | 2            | 56           | 7.75         | 1            | 2            | 35.92        | 3            | 20           | 30.28        |
| 6323104   | RPL10   | NP_013176.1 | 37.10        | 11           | 179          | 4.98         | 1            | 6            | 9.50         | 2            | 129          | 19.91        | 4            | 246          | 27.60        |
| 6319396   | SSA3    | NP_009478.1 | 17.87        | 13           | 193          | 6.63         | 3            | 9            | 1.69         | 1            | 6            | 10.17        | 4            | 7            | 19.72        |
| 6321786   | RPL14B  | NP_011862.1 | 51.45        | 8            | 135          | 44.20        | 7            | 54           | 5.80         | 1            | 6            | 0            | 0            | 0            | 0            |
| 6322847   | RPL14A  | NP_012920.1 | 51.45        | 8            | 141          | 44.20        | 7            | 54           | 5.80         | 1            | 6            | 41.30        | 5            | 141          | 45.65        |
| 6324670   | RPS7A   | NP_014739.1 | 26.84        | 5            | 78           | 29.47        | 6            | 21           | 0            | 0            | 0            | 51.05        | 8            | 32           | 31.05        |
| 6322668   | RPL17A  | NP_012741.1 | 49.46        | 8            | 271          | 22.83        | 3            | 17           | 12.50        | 2            | 20           | 52.72        | 7            | 209          | 36.41        |
| 398365285 | CAX4    | NP_011550.3 | 0            | 0            | 0            | 0            | 0            | 0            | 0            | 0            | 0            | 0            | 0            | 0            | 0            |
| 6322284   | RPL17B  | NP_012358.1 | 49.46        | 8            | 262          | 22.83        | 3            | 17           | 12.50        | 2            | 20           | 52.72        | 7            | 210          | 36.41        |
| 398364883 | RPS7B   | NP_014303.3 | 35.79        | 6            | 71           | 37.37        | 7            | 29           | 6.84         | 1            | 1            | 36.84        | 5            | 21           | 40.00        |
| 6323791   | RPL13B  | NP_013862.1 | 42.71        | 8            | 172          | 40.20        | 8            | 46           | 11.06        | 2            | 169          | 0            | 0            | 0            | 0            |
| 6320121   | RPL13A  | NP_010201.1 | 42.71        | 8            | 172          | 38.69        | 7            | 44           | 11.06        | 2            | 169          | 21.61        | 4            | 160          | 37.69        |
| 6324120   | SSB2    | NP_014190.1 | 54.98        | 32           | 913          | 21.53        | 9            | 46           | 14.03        | 8            | 104          | 46.82        | 23           | 291          | 58.73        |
| 6323577   | RPS1B   | NP_013648.1 | 39.22        | 9            | 77           | 21.96        | 5            | 14           | 11.37        | 3            | 32           | 18.43        | 3            | 7            | 35.29        |
| 6325157   | ATG21   | NP_015225.1 | 5.24         | 2            | 2            | 0            | 0            | 0            | 0            | 0            | 0            | 0            | 0            | 0            | 0            |
| 6323474   | RPS1A   | NP_013546.1 | 39.61        | 9            | 48           | 21.96        | 5            | 12           | 14.90        | 4            | 25           | 18.43        | 3            | 3            | 27.45        |
| 398364725 | RPL23B  | NP_011042.3 | 43.80        | 6            | 161          | 31.39        | 3            | 9            | 7.30         | 1            | 3            | 40.15        | 7            | 54           | 43.80        |
| 6319972   | SSB1    | NP_010052.1 | 54.98        | 32           | 881          | 23.65        | 10           | 47           | 14.03        | 8            | 104          | 46.82        | 23           | 301          | 58.73        |
| 154200011 | RPL20B  | NP_014957.2 | 38.95        | 7            | 150          | 23.84        | 4            | 14           | 26.74        | 5            | 199          | 24.42        | 5            | 375          | 30.23        |
| 6322989   | UBI4    | NP_013061.1 | 50.00        | 4            | 30           | 32.89        | 2            | 10           | 0            | 0            | 0            | 0            | 0            | 0            | 38.16        |
| 9755341   | RPS16A  | NP_013863.2 | 54.55        | 8            | 40           | 45.45        | 6            | 30           | 0            | 0            | 0            | 37.06        | 4            | 9            | 32.17        |
| 6319378   | RPL32   | NP_009460.1 | 44.62        | 6            | 99           | 16.15        | 2            | 5            | 6.15         | 1            | 1            | 6.15         | 1            | 4            | 23.85        |
| 6325061   | APL5    | NP_015129.1 | 0            | 0            | 0            | 0            | 0            | 0            | 0            | 0            | 0            | 0            | 0            | 0            | 0            |
| 398364505 | RPS3    | NP_014221.3 | 40.42        | 8            | 77           | 17.50        | 3            | 14           | 26.25        | 5            | 154          | 35.42        | 6            | 15           | 39.17        |
| 398365351 | RPS13   | NP_010349.3 | 56.29        | 8            | 94           | 41.06        | 5            | 10           | 13.25        | 2            | 4            | 23.84        | 4            | 84           | 45.70        |
| 6324260   | RPL16B  | NP_014330.1 | 31.82        | 8            | 94           | 13.64        | 2            | 5            | 8.08         | 2            | 40           | 27.78        | 5            | 15           | 27.27        |
| 398365605 | RPS30B  | NP_014825.3 | 30.16        | 2            | 16           | 15.87        | 1            | 5            | 0            | 0            | 0            | 0            | 0            | 0            | 15.87        |
| 6323481   | RPL6B   | NP_013553.1 | 32.39        | 7            | 56           | 14.20        | 2            | 4            | 29.55        | 6            | 49           | 20.45        | 3            | 19           | 37.50        |
| 398365377 | RPS9B   | NP_009748.3 | 34.36        | 9            | 62           | 0            | 0            | 0            | 12.82        | 3            | 126          | 18.46        | 3            | 18           | 30.26        |
| 6324265   | YDJ1    | NP_014335.1 | 30.56        | 12           | 81           | 0            | 0            | 0            | 6.85         | 2            | 5            | 29.10        | 7            | 65           | 27.87        |
| 398364745 | ATP7    | NP_012909.3 | 7.47         | 1            | 2            | 8.05         | 2            | 6            | 0            | 0            | 0            | 0            | 0            | 0            | 7.47         |
| 6321464   | RPS25A  | NP_011541.1 | 39.81        | 6            | 51           | 31.48        | 4            | 13           | 8.33         | 1            | 6            | 12.04        | 1            | 1            | 38.89        |
| 6323077   | RPS0B   | NP_013149.1 | 19.84        | 4            | 60           | 16.67        | 3            | 20           | 0            | 0            | 0            | 29.76        | 5            | 85           | 29.37        |
| 398365071 | RPS11A  | NP_010308.3 | 32.05        | 6            | 47           | 0            | 0            | 0            | 0            | 0            | 0            | 6.41         | 1            | 1            | 25.64        |
| 6321653   | RPS0A   | NP_011730.1 | 19.84        | 4            | 60           | 16.67        | 3            | 20           | 0            | 0            | 0            | 29.76        | 5            | 85           | 29.37        |
| 6323465   | CNA1    | NP_013537.1 | 3.62         | 2            | 2            | 1.99         | 1            | 1            | 1.99         | 1            | 1            | 0            | 0            | 0            | 7.23         |

Table S1 - Smith-Kinnaman, *et al* (2014) Abbreviations: %SC = percent sequence coverage, UP = unique peptides, PSM = peptide spectrum matches

| Accession | Acronym | NP_value    | %SC          | UP           | # PSM        | %SC          |
|-----------|---------|-------------|--------------|--------------|--------------|--------------|--------------|--------------|--------------|--------------|--------------|--------------|--------------|--------------|--------------|
|           |         |             | BY4741_TAP_1 | BY4741_TAP_1 | BY4741_TAP_1 | BY4741_TAP_2 |
| 6321335   | RPL28   | NP_011412.1 | 33.56        | 5            | 87           | 6.04         | 1            | 4            | 10.07        | 1            | 33           | 10.07        | 1            | 8            | 16.11        |
| 6322505   | SSC1    | NP_012579.1 | 45.26        | 27           | 231          | 9.79         | 4            | 18           | 4.89         | 3            | 7            | 15.14        | 7            | 13           | 45.87        |
| 6323567   | RPL6A   | NP_013638.1 | 22.16        | 6            | 35           | 8.52         | 1            | 2            | 15.91        | 3            | 28           | 14.77        | 2            | 6            | 25.57        |
| 6321754   | RPL8A   | NP_011830.1 | 50.00        | 14           | 222          | 30.86        | 9            | 22           | 10.94        | 3            | 60           | 28.52        | 7            | 164          | 42.19        |
| 6322984   | RPL8B   | NP_013055.1 | 50.00        | 14           | 227          | 34.38        | 10           | 23           | 14.45        | 4            | 70           | 28.52        | 7            | 165          | 49.22        |
| 6323615   | RPS18B  | NP_013686.1 | 54.11        | 9            | 55           | 17.81        | 3            | 12           | 15.07        | 2            | 30           | 29.45        | 4            | 18           | 43.15        |
| 398366307 | RPA190  | NP_014986.3 | 6.49         | 9            | 14           | 0            | 0            | 0            | 1.38         | 2            | 2            | 0            | 0            | 0            | 8.71         |
| 6324637   | RPL3    | NP_014706.1 | 38.76        | 16           | 266          | 18.35        | 6            | 29           | 6.72         | 3            | 20           | 21.19        | 8            | 43           | 27.13        |
| 6320128   | RPL31A  | NP_010208.1 | 55.75        | 7            | 52           | 31.86        | 3            | 66           | 0            | 0            | 0            | 7.96         | 1            | 2            | 38.94        |
| 398366143 | RPL31B  | NP_013510.3 | 55.75        | 7            | 48           | 23.89        | 2            | 56           | 0            | 0            | 0            | 0            | 0            | 0            | 0            |
| 398365761 | RPS23A  | NP_011633.3 | 26.21        | 4            | 30           | 20.00        | 3            | 8            | 0            | 0            | 0            | 7.59         | 1            | 24           | 33.79        |
| 6322137   | RPL34B  | NP_012212.1 | 6.61         | 1            | 33           | 6.61         | 1            | 4            | 6.61         | 1            | 1            | 9.09         | 2            | 7            | 6.61         |
| 6321315   | RPS2    | NP_011392.1 | 16.14        | 4            | 27           | 4.33         | 1            | 5            | 4.33         | 1            | 3            | 16.93        | 3            | 26           | 11.02        |
| 6320949   | RPS8B   | NP_011028.1 | 39.00        | 6            | 100          | 0            | 0            | 0            | 12.00        | 3            | 50           | 20.00        | 3            | 24           | 35.50        |
| 6321798   | RPL27A  | NP_011874.1 | 38.97        | 6            | 115          | 10.29        | 1            | 1            | 10.29        | 1            | 23           | 0            | 0            | 0            | 0            |
| 6325176   | RPS9A   | NP_015244.1 | 35.03        | 8            | 30           | 0            | 0            | 0            | 13.71        | 2            | 22           | 19.29        | 3            | 6            | 21.83        |
| 86558907  | RHR2    | NP_012211.2 | 20.80        | 4            | 10           | 9.60         | 2            | 3            | 0            | 0            | 0            | 10.80        | 1            | 1            | 32.80        |
| 6322058   | RPL16A  | NP_012133.1 | 36.18        | 9            | 73           | 14.07        | 2            | 3            | 8.04         | 2            | 33           | 27.14        | 6            | 21           | 31.66        |
| 6324027   | RPS19B  | NP_014097.1 | 56.94        | 7            | 26           | 47.92        | 5            | 37           | 18.75        | 2            | 5            | 25.69        | 3            | 14           | 45.14        |
| 6323090   | RPL22A  | NP_013162.1 | 38.02        | 3            | 8            | 55.37        | 3            | 37           | 14.05        | 1            | 1            | 41.32        | 2            | 9            | 55.37        |
| 6320142   | RPS29B  | NP_010222.1 | 0            | 0            | 0            | 0            | 0            | 0            | 0            | 0            | 0            | 0            | 0            | 0            | 0            |
| 6324807   | KIN4    | NP_014876.1 | 0            | 0            | 0            | 0            | 0            | 0            | 0            | 0            | 0            | 0            | 0            | 0            | 0            |
| 6321522   | RPL11B  | NP_011599.1 | 36.78        | 8            | 43           | 24.71        | 4            | 11           | 12.64        | 2            | 13           | 24.71        | 4            | 81           | 31.03        |
| 6322583   | RPS5    | NP_012657.1 | 34.67        | 7            | 71           | 25.78        | 5            | 33           | 0            | 0            | 0            | 29.33        | 5            | 23           | 29.78        |
| 6325126   | RPL5    | NP_015194.1 | 29.97        | 7            | 92           | 8.75         | 2            | 7            | 3.37         | 1            | 1            | 22.90        | 3            | 7            | 19.19        |
| 6323073   | PDC1    | NP_013145.1 | 36.06        | 17           | 450          | 27.53        | 10           | 71           | 7.64         | 4            | 30           | 48.31        | 19           | 321          | 43.69        |
| 398366277 | VMA4    | NP_014977.3 | 53.65        | 14           | 154          | 32.62        | 7            | 31           | 13.73        | 3            | 21           | 23.18        | 5            | 9            | 53.22        |
| 6323824   | HOT1    | NP_013895.1 | 0            | 0            | 0            | 0            | 0            | 0            | 0            | 0            | 0            | 0            | 0            | 0            | 0            |
| 6325066   | NAB3    | NP_015134.1 | 1.12         | 1            | 1            | 0            | 0            | 0            | 0            | 0            | 0            | 0            | 0            | 0            | 0            |
| 398364517 | RPS24A  | NP_010997.3 | 31.85        | 5            | 127          | 17.78        | 2            | 19           | 6.67         | 1            | 3            | 17.78        | 2            | 39           | 31.85        |
| 6321362   | RPL7A   | NP_011439.1 | 39.75        | 8            | 112          | 18.03        | 3            | 5            | 9.02         | 2            | 7            | 38.52        | 8            | 58           | 43.44        |
| 6325058   | RPL7B   | NP_015126.1 | 39.75        | 8            | 54           | 18.03        | 3            | 5            | 9.02         | 2            | 8            | 38.52        | 8            | 49           | 43.44        |
| 37362649  | GUS1    | NP_011269.2 | 21.33        | 14           | 47           | 1.84         | 1            | 1            | 3.11         | 2            | 14           | 5.65         | 4            | 18           | 33.76        |
| 398365909 | RPL24B  | NP_011664.3 | 31.61        | 6            | 58           | 0            | 0            | 0            | 0            | 0            | 0            | 20.65        | 3            | 40           | 15.48        |
| 6324707   | EFT1    | NP_014776.1 | 44.30        | 34           | 751          | 20.19        | 14           | 35           | 11.64        | 8            | 62           | 11.28        | 8            | 93           | 48.93        |
| 6323376   | RPL26A  | NP_013448.1 | 48.82        | 8            | 59           | 29.92        | 6            | 13           | 6.30         | 1            | 24           | 0            | 0            | 0            | 0            |
| 116006491 | RPL26B  | NP_011548.2 | 49.61        | 9            | 52           | 22.05        | 5            | 9            | 6.30         | 1            | 24           | 32.28        | 7            | 43           | 35.43        |

Table S1 - Smith-Kinnaman, *et al* (2014) Abbreviations: %SC = percent sequence coverage, UP = unique peptides, PSM = peptide spectrum matches

| Accession | Acronym | NP_value    | %SC          | UP           | # PSM        | %SC          |
|-----------|---------|-------------|--------------|--------------|--------------|--------------|--------------|--------------|--------------|--------------|--------------|--------------|--------------|--------------|--------------|
|           |         |             | BY4741_TAP_1 | BY4741_TAP_1 | BY4741_TAP_1 | BY4741_TAP_2 |
| 6325006   | RPL36B  | NP_015074.1 | 44.00        | 7            | 141          | 50.00        | 8            | 36           | 31.00        | 3            | 51           | 33.00        | 4            | 73           | 40.00        |
| 6323848   | RPL36A  | NP_013920.1 | 43.00        | 6            | 112          | 40.00        | 6            | 33           | 31.00        | 3            | 37           | 0            | 0            | 0            | 0            |
| 398366579 | RPL12B  | NP_010706.3 | 53.94        | 7            | 166          | 24.24        | 3            | 12           | 9.09         | 1            | 1            | 30.91        | 4            | 57           | 49.70        |
| 6321540   | NOP7    | NP_011617.1 | 5.45         | 2            | 2            | 0            | 0            | 0            | 0            | 0            | 0            | 0            | 0            | 0            | 1.49         |
| 398365599 | PDC6    | NP_011601.3 | 6.93         | 3            | 103          | 3.37         | 1            | 3            | 1.60         | 1            | 25           | 8.17         | 3            | 52           | 6.93         |
| 6323163   | PDC5    | NP_013235.1 | 5.15         | 2            | 53           | 5.15         | 2            | 5            | 1.78         | 1            | 2            | 12.79        | 4            | 20           | 5.15         |
| 6323583   | CMP2    | NP_013655.1 | 7.62         | 4            | 10           | 0            | 0            | 0            | 0            | 0            | 0            | 0            | 0            | 0            | 7.78         |
| 398365991 | CLC1    | NP_011683.3 | 25.32        | 5            | 8            | 12.45        | 2            | 10           | 0            | 0            | 0            | 0            | 0            | 0            | 6.87         |
| 37362619  | RXT2    | NP_009653.2 | 4.65         | 2            | 2            | 0            | 0            | 0            | 0            | 0            | 0            | 0            | 0            | 0            | 5.12         |
| 10383793  | RPS14A  | NP_009960.2 | 49.64        | 8            | 61           | 37.96        | 5            | 15           | 25.55        | 4            | 34           | 59.85        | 7            | 24           | 40.15        |
| 6322271   | RPS22A  | NP_012345.1 | 24.62        | 3            | 52           | 24.62        | 3            | 13           | 0            | 0            | 0            | 25.38        | 2            | 3            | 24.62        |
| 6321407   | RPL24A  | NP_011484.1 | 32.26        | 7            | 92           | 5.81         | 1            | 1            | 6.45         | 1            | 2            | 20.65        | 3            | 42           | 22.58        |
| 6323357   | RPL38   | NP_013429.1 | 41.03        | 3            | 42           | 28.21        | 2            | 6            | 0            | 0            | 0            | 35.90        | 2            | 10           | 32.05        |
| 398366183 | HTB1    | NP_010510.3 | 31.30        | 5            | 15           | 25.95        | 4            | 9            | 0            | 0            | 0            | 11.45        | 1            | 1            | 39.69        |
| 398364287 | GCN1    | NP_011320.3 | 3.29         | 9            | 15           | 0            | 0            | 0            | 1.27         | 3            | 11           | 1.98         | 4            | 8            | 8.16         |
| 6320016   | VMA1    | NP_010096.1 | 28.48        | 29           | 176          | 0.84         | 1            | 1            | 2.80         | 3            | 3            | 13.63        | 11           | 88           | 33.43        |
| 14318481  | TUB2    | NP_116616.1 | 20.57        | 8            | 70           | 0            | 0            | 0            | 1.97         | 1            | 3            | 29.98        | 9            | 88           | 27.79        |
| 398364585 | KAR2    | NP_012500.3 | 30.65        | 20           | 121          | 0            | 0            | 0            | 3.67         | 2            | 10           | 4.40         | 2            | 56           | 32.40        |
| 6323196   | RPS31   | NP_013268.1 | 10.53        | 1            | 3            | 0            | 0            | 0            | 0            | 0            | 0            | 0            | 0            | 0            | 10.53        |
| 6321013   | PAB1    | NP_011092.1 | 47.14        | 24           | 171          | 27.21        | 10           | 23           | 5.03         | 2            | 13           | 4.51         | 2            | 67           | 35.18        |
| 6324993   | FUM1    | NP_015061.1 | 2.66         | 1            | 1            | 0            | 0            | 0            | 0            | 0            | 0            | 0            | 0            | 0            | 2.66         |
| 398366075 | RPS29A  | NP_013492.3 | 14.29        | 1            | 2            | 14.29        | 1            | 5            | 0            | 0            | 0            | 0            | 0            | 0            | 14.29        |
| 6322755   | YJU2    | NP_012828.1 | 0            | 0            | 0            | 0            | 0            | 0            | 0            | 0            | 0            | 0            | 0            | 0            | 11.15        |
| 398366059 | PLP2    | NP_014924.3 | 8.39         | 2            | 3            | 0            | 0            | 0            | 0            | 0            | 0            | 0            | 0            | 0            | 7.34         |
| 6320718   | SMT3    | NP_010798.1 | 0            | 0            | 0            | 0            | 0            | 0            | 0            | 0            | 0            | 0            | 0            | 0            | 6.93         |
| 398365031 | YBR139W | NP_009697.3 | 0            | 0            | 0            | 0            | 0            | 0            | 0            | 0            | 0            | 0            | 0            | 0            | 0            |
| 6321850   | FYV4    | NP_011926.1 | 0            | 0            | 0            | 0            | 0            | 0            | 0            | 0            | 0            | 0            | 0            | 0            | 0            |
| 398366083 | TDH3    | NP_011708.3 | 41.27        | 14           | 233          | 55.12        | 20           | 643          | 12.05        | 4            | 85           | 62.65        | 14           | 151          | 49.70        |
| 6319279   | CDC19   | NP_009362.1 | 48.20        | 22           | 147          | 53.80        | 24           | 121          | 18.40        | 8            | 26           | 38.20        | 16           | 363          | 55.60        |
| 6322468   | TDH2    | NP_012542.1 | 41.27        | 13           | 231          | 49.70        | 16           | 639          | 12.05        | 4            | 85           | 34.64        | 10           | 102          | 47.59        |
| 6321249   | RPS26A  | NP_011326.1 | 26.05        | 3            | 41           | 20.17        | 2            | 2            | 20.17        | 2            | 7            | 0            | 0            | 0            | 0            |
| 6321772   | RPS20   | NP_011848.1 | 37.19        | 4            | 27           | 37.19        | 5            | 17           | 12.40        | 2            | 3            | 36.36        | 4            | 17           | 45.45        |
| 14318474  | SEC53   | NP_116609.1 | 22.05        | 5            | 8            | 0            | 0            | 0            | 0            | 0            | 0            | 0            | 0            | 0            | 31.10        |
| 6320589   | YRA1    | NP_010669.1 | 14.16        | 3            | 11           | 0            | 0            | 0            | 0            | 0            | 0            | 3.54         | 1            | 1            | 20.80        |
| 6320805   | ECM10   | NP_010884.1 | 12.27        | 9            | 93           | 0            | 0            | 0            | 1.24         | 1            | 1            | 0            | 0            | 0            | 0            |
| 6323776   | ECM16   | NP_013847.1 | 0            | 0            | 0            | 0            | 0            | 0            | 0            | 0            | 0            | 0            | 0            | 0            | 0            |
| 6320596   | RVS167  | NP_010676.1 | 5.60         | 2            | 5            | 0            | 0            | 0            | 0            | 0            | 0            | 6.43         | 3            | 3            | 4.98         |

Table S1 - Smith-Kinnaman, *et al* (2014) Abbreviations: %SC = percent sequence coverage, UP = unique peptides, PSM = peptide spectrum matches

| Accession | Acronym | NP_value    | %SC          | UP           | # PSM        | %SC          |
|-----------|---------|-------------|--------------|--------------|--------------|--------------|--------------|--------------|--------------|--------------|--------------|--------------|--------------|--------------|--------------|
|           |         |             | BY4741_TAP_1 | BY4741_TAP_1 | BY4741_TAP_1 | BY4741_TAP_2 |
| 398366359 | SLH1    | NP_011787.4 | 0.81         | 1            | 1            | 0            | 0            | 0            | 0            | 0            | 0            | 0            | 0            | 0            | 0.46         |
| 6324321   | SIS1    | NP_014391.1 | 42.33        | 11           | 69           | 17.05        | 4            | 10           | 3.41         | 1            | 1            | 0            | 0            | 0            | 26.14        |
| 6319447   | NCL1    | NP_009529.1 | 5.99         | 3            | 5            | 0            | 0            | 0            | 4.82         | 2            | 4            | 0            | 0            | 0            | 16.52        |
| 6323112   | EMP70   | NP_013184.1 | 8.25         | 4            | 4            | 0            | 0            | 0            | 0            | 0            | 0            | 0            | 0            | 0            | 2.40         |
| 6324595   | SFM1    | NP_014664.1 | 13.62        | 3            | 4            | 0            | 0            | 0            | 0            | 0            | 0            | 0            | 0            | 0            | 0            |
| 330443411 | UBP13   | NP_009486.3 | 0            | 0            | 0            | 0            | 0            | 0            | 0            | 0            | 0            | 0            | 0            | 0            | 1.87         |
| 6323868   | EFR3    | NP_013939.1 | 0            | 0            | 0            | 0            | 0            | 0            | 1.79         | 1            | 2            | 0            | 0            | 0            | 0            |
| 330443676 | CDC34   | NP_013418.2 | 5.00         | 2            | 7            | 0            | 0            | 0            | 0            | 0            | 0            | 0            | 0            | 0            | 10.58        |
| 6320615   | TRS120  | NP_010695.1 | 0            | 0            | 0            | 0            | 0            | 0            | 0            | 0            | 0            | 0            | 0            | 0            | 0.93         |
| 6323487   | FMP27   | NP_013559.1 | 0.49         | 1            | 1            | 0            | 0            | 0            | 0            | 0            | 0            | 0            | 0            | 0            | 0.34         |
| 6320231   | REG1    | NP_010311.1 | 0.89         | 1            | 5            | 1.28         | 1            | 1            | 0            | 0            | 0            | 0.89         | 1            | 1            | 0            |
| 6324585   | AUS1    | NP_014654.1 | 0            | 0            | 0            | 0            | 0            | 0            | 0            | 0            | 0            | 0            | 0            | 0            | 0            |
| 6325048   | RKM1    | NP_015116.1 | 6.86         | 4            | 5            | 0            | 0            | 0            | 0            | 0            | 0            | 0            | 0            | 0            | 0            |
| 6323732   | SEG1    | NP_013803.1 | 0            | 0            | 0            | 0            | 0            | 0            | 0            | 0            | 0            | 0            | 0            | 0            | 0            |
| 398364779 | YGL041W | NP_00110617 | 5.19         | 1            | 1            | 18.83        | 2            | 6            | 0            | 0            | 0            | 0            | 0            | 0            | 0            |
| 398365827 | CAF130  | NP_011650.3 | 0            | 0            | 0            | 0            | 0            | 0            | 0            | 0            | 0            | 0            | 0            | 0            | 0            |
| 6325063   | RSA1    | NP_015131.1 | 0            | 0            | 0            | 0            | 0            | 0            | 0            | 0            | 0            | 0            | 0            | 0            | 0            |
| 398365559 | MSH6    | NP_010382.3 | 1.61         | 2            | 2            | 0            | 0            | 0            | 0            | 0            | 0            | 0            | 0            | 0            | 0            |
| 398365727 | YNR034W | NP_061494.3 | 0            | 0            | 0            | 0            | 0            | 0            | 0            | 0            | 0            | 0            | 0            | 0            | 40.82        |
| 6323683   | YET2    | NP_013754.1 | 4.38         | 1            | 1            | 0            | 0            | 0            | 0            | 0            | 0            | 0            | 0            | 0            | 0            |
| 330443366 | GPB2    | NP_009345.3 | 0            | 0            | 0            | 0            | 0            | 0            | 0            | 0            | 0            | 0            | 0            | 0            | 0            |
| 6325012   | HUT1    | NP_015080.1 | 0            | 0            | 0            | 0            | 0            | 0            | 0            | 0            | 0            | 0            | 0            | 0            | 0            |
| 99030927  | KKQ8    | NP_012753.2 | 0            | 0            | 0            | 0            | 0            | 0            | 0            | 0            | 0            | 0            | 0            | 0            | 0            |
| 398364567 | MAD1    | NP_011429.3 | 0            | 0            | 0            | 0            | 0            | 0            | 0            | 0            | 0            | 0            | 0            | 0            | 0            |
| 6320763   | RMD6    | NP_010842.1 | 0            | 0            | 0            | 0            | 0            | 0            | 0            | 0            | 0            | 0            | 0            | 0            | 0            |
| 398365009 | MEC1    | NP_009694.3 | 17.02        | 39           | 241          | 0            | 0            | 0            | 0            | 0            | 0            | 0            | 0            | 0            | 28.25        |
| 398364407 | RPL9A   | NP_011368.3 | 29.32        | 5            | 44           | 19.90        | 3            | 13           | 6.28         | 1            | 12           | 35.08        | 6            | 74           | 48.69        |
| 6324298   | HHF2    | NP_014368.1 | 40.78        | 4            | 26           | 0            | 0            | 0            | 9.71         | 1            | 4            | 0            | 0            | 0            | 40.78        |
| 6324262   | RPL9B   | NP_014332.1 | 19.37        | 4            | 38           | 9.95         | 2            | 5            | 6.28         | 1            | 12           | 25.13        | 5            | 47           | 48.69        |
| 398364523 | TDH1    | NP_012483.3 | 22.59        | 6            | 83           | 31.63        | 8            | 273          | 9.34         | 3            | 84           | 24.70        | 8            | 69           | 28.92        |
| 398364951 | VMA2    | NP_009685.3 | 59.77        | 27           | 245          | 15.09        | 5            | 12           | 7.54         | 3            | 6            | 43.71        | 16           | 152          | 60.54        |
| 6321333   | ARC1    | NP_011410.1 | 9.84         | 3            | 7            | 0            | 0            | 0            | 6.91         | 2            | 7            | 2.66         | 1            | 1            | 17.29        |
| 6321408   | RPL30   | NP_011485.1 | 56.19        | 4            | 76           | 29.52        | 2            | 7            | 0            | 0            | 0            | 21.90        | 2            | 22           | 38.10        |
| 6324445   | RPL25   | NP_014514.1 | 42.96        | 6            | 106          | 24.65        | 3            | 14           | 24.65        | 3            | 21           | 18.31        | 2            | 19           | 35.21        |
| 6325114   | RPL33A  | NP_015182.1 | 25.23        | 3            | 34           | 0            | 0            | 0            | 9.35         | 1            | 3            | 9.35         | 1            | 2            | 24.30        |
| 398365881 | RPL33B  | NP_014877.3 | 24.30        | 2            | 25           | 0            | 0            | 0            | 9.35         | 1            | 3            | 9.35         | 1            | 2            | 24.30        |
| 398364339 | THS1    | NP_116578.3 | 17.03        | 11           | 31           | 2.18         | 1            | 1            | 1.91         | 1            | 1            | 5.59         | 3            | 5            | 31.74        |











Table S1 - Smith-Kinnaman, *et al* (2014) Abbreviations: %SC = percent sequence coverage, UP = unique peptides, PSM = peptide spectrum matches

| Accession | Acronym  | NP_value    | %SC          | UP           | # PSM        | %SC          |
|-----------|----------|-------------|--------------|--------------|--------------|--------------|--------------|--------------|--------------|--------------|--------------|--------------|--------------|--------------|--------------|
|           |          |             | BY4741_TAP_1 | BY4741_TAP_1 | BY4741_TAP_1 | BY4741_TAP_2 |
| 398365335 | YNL033W  | NP_014365.3 | 0            | 0            | 0            | 0            | 0            | 0            | 0            | 0            | 0            | 0            | 0            | 0            | 0            |
| 33438893  | YPL119C- | NP_878181.1 | 0            | 0            | 0            | 0            | 0            | 0            | 0            | 0            | 0            | 0            | 0            | 0            | 0            |
| 6322579   | JHD2     | NP_012653.1 | 0            | 0            | 0            | 0            | 0            | 0            | 0            | 0            | 0            | 0            | 0            | 0            | 0            |
| 6324141   | KAR1     | NP_014211.1 | 0            | 0            | 0            | 0            | 0            | 0            | 0            | 0            | 0            | 0            | 0            | 0            | 0            |
| 10383756  | LRE1     | NP_009879.2 | 0            | 0            | 0            | 0            | 0            | 0            | 0            | 0            | 0            | 0            | 0            | 0            | 0            |
| 398364917 | NHP10    | NP_010282.3 | 0            | 0            | 0            | 0            | 0            | 0            | 0            | 0            | 0            | 0            | 0            | 0            | 0            |
| 6323035   | NSE1     | NP_013107.1 | 0            | 0            | 0            | 0            | 0            | 0            | 0            | 0            | 0            | 0            | 0            | 0            | 0            |
| 50593425  | OMA1     | NP_013013.2 | 0            | 0            | 0            | 0            | 0            | 0            | 0            | 0            | 0            | 0            | 0            | 0            | 0            |
| 6321910   | ORC6     | NP_011986.1 | 0            | 0            | 0            | 0            | 0            | 0            | 0            | 0            | 0            | 0            | 0            | 0            | 0            |
| 6322494   | PET191   | NP_012568.1 | 0            | 0            | 0            | 0            | 0            | 0            | 0            | 0            | 0            | 0            | 0            | 0            | 0            |
| 398365057 | SPO14    | NP_012956.3 | 0            | 0            | 0            | 0            | 0            | 0            | 0            | 0            | 0            | 0            | 0            | 0            | 0            |
| 398364971 | TRP1     | NP_010290.3 | 0            | 0            | 0            | 0            | 0            | 0            | 0            | 0            | 0            | 0            | 0            | 0            | 0            |
| 398365003 | PSF1     | NP_010296.3 | 0            | 0            | 0            | 0            | 0            | 0            | 0            | 0            | 0            | 0            | 0            | 0            | 0            |
| 6321697   | RAD2     | NP_011774.1 | 0            | 0            | 0            | 0            | 0            | 0            | 0            | 0            | 0            | 0            | 0            | 0            | 0            |
| 6319525   | REG2     | NP_009606.1 | 0            | 0            | 0            | 0            | 0            | 0            | 0            | 0            | 0            | 0            | 0            | 0            | 0            |
| 6320271   | RTR2     | NP_010351.1 | 0            | 0            | 0            | 0            | 0            | 0            | 0            | 0            | 0            | 0            | 0            | 0            | 0            |
| 6324162   | SKO1     | NP_014232.1 | 0            | 0            | 0            | 0            | 0            | 0            | 0            | 0            | 0            | 0            | 0            | 0            | 0            |
| 398366633 | SNM1     | NP_010766.3 | 0            | 0            | 0            | 0            | 0            | 0            | 0            | 0            | 0            | 0            | 0            | 0            | 0            |
| 6322778   | STB6     | NP_012851.1 | 0            | 0            | 0            | 0            | 0            | 0            | 0            | 0            | 0            | 0            | 0            | 0            | 0            |
| 6325081   | TRE1     | NP_015149.1 | 0            | 0            | 0            | 0            | 0            | 0            | 0            | 0            | 0            | 0            | 0            | 0            | 0            |
| 6324447   | TRM13    | NP_014516.1 | 0            | 0            | 0            | 0            | 0            | 0            | 0            | 0            | 0            | 0            | 0            | 0            | 0            |
| 6323236   | HRD3     | NP_013308.1 | 0            | 0            | 0            | 0            | 0            | 0            | 0            | 0            | 0            | 0            | 0            | 0            | 0            |
| 6325184   | UBP16    | NP_015253.1 | 0            | 0            | 0            | 0            | 0            | 0            | 0            | 0            | 0            | 0            | 0            | 0            | 0            |
| 398364885 | UBP5     | NP_011071.3 | 0            | 0            | 0            | 0            | 0            | 0            | 0            | 0            | 0            | 0            | 0            | 0            | 0            |
| 6325071   | UIP4     | NP_015138.1 | 0            | 0            | 0            | 0            | 0            | 0            | 0            | 0            | 0            | 0            | 0            | 0            | 0            |
| 398365127 | UIP5     | NP_012970.3 | 0            | 0            | 0            | 0            | 0            | 0            | 0            | 0            | 0            | 0            | 0            | 0            | 0            |
| 6319904   | YIH1     | NP_009985.1 | 0            | 0            | 0            | 0            | 0            | 0            | 0            | 0            | 0            | 0            | 0            | 0            | 0            |
| 6325266   | SUT2     | NP_015334.1 | 0            | 0            | 0            | 0            | 0            | 0            | 0            | 0            | 0            | 0            | 0            | 0            | 0            |
| 6324449   | HRP1     | NP_014518.1 | 9.74         | 3            | 6            | 4.31         | 1            | 1            | 0            | 0            | 0            | 0            | 0            | 0            | 3.18         |
| 6323278   | YEF3     | NP_013350.1 | 26.05        | 26           | 305          | 2.49         | 2            | 4            | 9.39         | 9            | 161          | 29.98        | 19           | 222          | 43.68        |
| 6322084   | PFK26    | NP_012159.1 | 22.73        | 18           | 84           | 0            | 0            | 0            | 5.68         | 3            | 25           | 1.21         | 1            | 1            | 37.85        |
| 6323057   | RPL15A   | NP_013129.1 | 26.47        | 6            | 72           | 3.43         | 1            | 1            | 0            | 0            | 0            | 20.59        | 4            | 46           | 25.49        |
| 6323769   | RPL15B   | NP_013840.1 | 26.47        | 6            | 46           | 0            | 0            | 0            | 0            | 0            | 0            | 20.59        | 4            | 10           | 25.49        |
| 6319282   | FUN12    | NP_009365.1 | 5.89         | 5            | 12           | 0            | 0            | 0            | 1.30         | 1            | 2            | 0.90         | 1            | 2            | 3.09         |
| 6320190   | NOP1     | NP_010270.1 | 11.01        | 4            | 7            | 0            | 0            | 0            | 0            | 0            | 0            | 0            | 0            | 0            | 35.17        |
| 6323654   | CLU1     | NP_013725.1 | 5.40         | 6            | 9            | 0            | 0            | 0            | 4.62         | 4            | 11           | 1.64         | 2            | 2            | 16.60        |
| 6324886   | NOP58    | NP_014955.1 | 12.72        | 6            | 14           | 0            | 0            | 0            | 5.87         | 2            | 8            | 0            | 0            | 0            | 20.74        |



Table S1 - Smith-Kinnaman, *et al* (2014) Abbreviations: %SC = percent sequence coverage, UP = unique peptides, PSM = peptide spectrum matches

| Accession | Acronym | NP_value    | %SC          | UP           | # PSM        | %SC          |
|-----------|---------|-------------|--------------|--------------|--------------|--------------|--------------|--------------|--------------|--------------|--------------|--------------|--------------|--------------|--------------|
|           |         |             | BY4741_TAP_1 | BY4741_TAP_1 | BY4741_TAP_1 | BY4741_TAP_2 |
| 6321807   | DED81   | NP_011883.1 | 24.37        | 10           | 33           | 2.17         | 1            | 2            | 7.40         | 3            | 7            | 0            | 0            | 0            | 33.57        |
| 398364767 | SUI2    | NP_012540.3 | 9.54         | 2            | 5            | 0            | 0            | 0            | 3.62         | 1            | 2            | 0            | 0            | 0            | 18.75        |
| 6323011   | DPS1    | NP_013083.1 | 32.68        | 16           | 46           | 0            | 0            | 0            | 5.75         | 2            | 5            | 3.23         | 2            | 13           | 35.01        |
| 6323885   | RRP5    | NP_013956.1 | 4.80         | 8            | 12           | 0            | 0            | 0            | 1.91         | 3            | 4            | 0.52         | 1            | 1            | 8.62         |
| 398366547 | RPP2B   | NP_010670.3 | 98.18        | 8            | 114          | 60.00        | 3            | 19           | 23.64        | 2            | 30           | 23.64        | 2            | 3            | 81.82        |
| 6323288   | HSP60   | NP_013360.1 | 49.65        | 25           | 160          | 30.07        | 13           | 45           | 13.99        | 7            | 50           | 18.36        | 9            | 18           | 44.76        |
| 6321599   | NSR1    | NP_011675.1 | 17.87        | 7            | 10           | 0            | 0            | 0            | 3.38         | 1            | 15           | 0            | 0            | 0            | 13.04        |
| 6320863   | GCD11   | NP_010942.1 | 13.28        | 5            | 7            | 0            | 0            | 0            | 3.61         | 1            | 1            | 1.71         | 1            | 11           | 16.70        |
| 398366591 | NPL3    | NP_010720.3 | 13.77        | 4            | 16           | 6.52         | 2            | 2            | 3.38         | 1            | 2            | 11.35        | 3            | 18           | 27.05        |
| 6319483   | IPP1    | NP_009565.1 | 20.21        | 5            | 6            | 17.07        | 3            | 8            | 4.18         | 1            | 1            | 0            | 0            | 0            | 9.76         |
| 6325221   | PMA2    | NP_015289.1 | 17.53        | 16           | 229          | 1.37         | 1            | 1            | 4.01         | 3            | 71           | 0            | 0            | 0            | 0            |
| 6322745   | GFA1    | NP_012818.1 | 13.67        | 8            | 33           | 0            | 0            | 0            | 3.49         | 2            | 3            | 15.20        | 7            | 22           | 32.50        |
| 398364525 | LSG1    | NP_011416.3 | 5.16         | 3            | 3            | 0            | 0            | 0            | 2.19         | 1            | 1            | 0            | 0            | 0            | 3.91         |
| 6325038   | SAR1    | NP_015106.1 | 19.47        | 3            | 29           | 0            | 0            | 0            | 6.84         | 1            | 8            | 13.68        | 2            | 104          | 46.32        |
| 6323840   | HSC82   | NP_013911.1 | 48.09        | 34           | 428          | 9.22         | 5            | 17           | 19.15        | 13           | 109          | 11.21        | 5            | 8            | 41.28        |
| 6321881   | GAR1    | NP_011957.1 | 11.71        | 2            | 2            | 0            | 0            | 0            | 0            | 0            | 0            | 10.24        | 1            | 1            | 14.15        |
| 6320164   | NAT1    | NP_010244.1 | 1.41         | 1            | 1            | 0            | 0            | 0            | 3.16         | 2            | 4            | 0            | 0            | 0            | 5.62         |
| 398366403 | RPS12   | NP_015014.3 | 26.57        | 5            | 44           | 18.88        | 2            | 2            | 8.39         | 1            | 2            | 0            | 0            | 0            | 29.37        |
| 6322830   | CDC16   | NP_012903.1 | 20.24        | 15           | 92           | 0            | 0            | 0            | 0            | 0            | 0            | 0            | 0            | 0            | 24.52        |
| 330443397 | ATP1    | NP_009453.2 | 28.99        | 16           | 123          | 7.52         | 3            | 4            | 11.93        | 6            | 27           | 32.84        | 16           | 287          | 37.25        |
| 6324709   | IDH2    | NP_014779.1 | 3.79         | 2            | 2            | 4.88         | 1            | 2            | 0            | 0            | 0            | 8.13         | 2            | 3            | 14.91        |
| 6325178   | RPL21B  | NP_015246.1 | 39.38        | 7            | 198          | 16.88        | 3            | 5            | 16.25        | 3            | 89           | 0            | 0            | 0            | 0            |
| 6321903   | UBA4    | NP_011979.1 | 25.91        | 13           | 108          | 0            | 0            | 0            | 5.91         | 2            | 2            | 0            | 0            | 0            | 28.86        |
| 6325138   | DBP1    | NP_015206.1 | 8.10         | 5            | 36           | 0            | 0            | 0            | 0            | 0            | 0            | 0            | 0            | 0            | 0            |
| 6325248   | TAE2    | NP_015316.1 | 0            | 0            | 0            | 0            | 0            | 0            | 0            | 0            | 0            | 0            | 0            | 0            | 3.18         |
| 330443505 | DBP10   | NP_010253.2 | 0            | 0            | 0            | 0            | 0            | 0            | 0            | 0            | 0            | 0.90         | 1            | 1            | 1.31         |
| 6320148   | PSA1    | NP_010228.1 | 22.16        | 6            | 40           | 4.99         | 1            | 5            | 0            | 0            | 0            | 0            | 0            | 0            | 42.66        |
| 6325016   | HSP82   | NP_015084.1 | 46.12        | 32           | 408          | 6.77         | 4            | 15           | 17.63        | 12           | 108          | 6.91         | 4            | 6            | 42.60        |
| 6320874   | ARB1    | NP_010953.1 | 25.41        | 14           | 30           | 0            | 0            | 0            | 6.56         | 3            | 27           | 13.77        | 6            | 128          | 19.84        |
| 6319673   | PGI1    | NP_009755.1 | 7.40         | 4            | 7            | 7.40         | 3            | 37           | 2.71         | 1            | 4            | 0            | 0            | 0            | 7.04         |
| 398365251 | GSC2    | NP_011546.3 | 6.12         | 10           | 41           | 0            | 0            | 0            | 1.21         | 2            | 2            | 0            | 0            | 0            | 11.50        |
| 6325018   | SUI3    | NP_015087.1 | 14.74        | 4            | 14           | 4.21         | 1            | 2            | 6.67         | 2            | 2            | 0            | 0            | 0            | 33.68        |
| 6323374   | FKS1    | NP_013446.1 | 12.90        | 18           | 83           | 0            | 0            | 0            | 1.23         | 2            | 6            | 0            | 0            | 0            | 18.28        |
| 14318479  | ACT1    | NP_116614.1 | 40.00        | 13           | 158          | 7.73         | 3            | 4            | 8.80         | 3            | 6            | 28.80        | 6            | 52           | 37.33        |
| 6323554   | TUB1    | NP_013625.1 | 20.13        | 7            | 32           | 0            | 0            | 0            | 2.01         | 1            | 2            | 16.55        | 4            | 22           | 26.85        |
| 6321724   | ZUO1    | NP_011801.1 | 26.33        | 9            | 19           | 0            | 0            | 0            | 5.77         | 2            | 7            | 12.01        | 3            | 4            | 30.95        |
| 6320842   | NUG1    | NP_010921.1 | 13.27        | 5            | 6            | 0            | 0            | 0            | 0            | 0            | 0            | 1.92         | 1            | 2            | 21.15        |



Table S1 - Smith-Kinnaman, *et al* (2014) Abbreviations: %SC = percent sequence coverage, UP = unique peptides, PSM = peptide spectrum matches

| Accession | Acronym | NP_value    | %SC          | UP           | # PSM        | %SC          |
|-----------|---------|-------------|--------------|--------------|--------------|--------------|--------------|--------------|--------------|--------------|--------------|--------------|--------------|--------------|--------------|
|           |         |             | BY4741_TAP_1 | BY4741_TAP_1 | BY4741_TAP_1 | BY4741_TAP_2 |
| 6321027   | DMC1    | NP_011106.1 | 0            | 0            | 0            | 0            | 0            | 0            | 0            | 0            | 0            | 0            | 0            | 0            | 0            |
| 398364483 | HOR2    | NP_010984.3 | 10.00        | 2            | 5            | 4.00         | 1            | 2            | 0            | 0            | 0            | 0            | 0            | 0            | 0            |
| 398365429 | PDR5    | NP_014796.3 | 12.97        | 17           | 59           | 0            | 0            | 0            | 0.73         | 1            | 1            | 0            | 0            | 0            | 11.25        |
| 6325245   | RRP12   | NP_015313.1 | 1.22         | 1            | 1            | 0            | 0            | 0            | 2.36         | 2            | 2            | 0            | 0            | 0            | 2.12         |
| 398364937 | TOP2    | NP_014311.3 | 0.84         | 1            | 2            | 0            | 0            | 0            | 0            | 0            | 0            | 0            | 0            | 0            | 5.25         |
| 6324660   | TCB1    | NP_014729.1 | 4.05         | 4            | 9            | 0            | 0            | 0            | 1.26         | 1            | 1            | 0            | 0            | 0            | 2.78         |
| 6320056   | COP1    | NP_010136.1 | 12.49        | 13           | 43           | 0            | 0            | 0            | 0            | 0            | 0            | 1.50         | 1            | 3            | 10.82        |
| 398365597 | BMH2    | NP_010384.3 | 36.26        | 11           | 47           | 23.08        | 5            | 13           | 5.13         | 1            | 1            | 4.03         | 1            | 1            | 21.98        |
| 6325030   | NEW1    | NP_015098.1 | 14.88        | 15           | 41           | 0            | 0            | 0            | 3.09         | 3            | 3            | 1.59         | 2            | 10           | 16.72        |
| 6321809   | RPS27B  | NP_011885.1 | 18.29        | 2            | 26           | 0            | 0            | 0            | 0            | 0            | 0            | 9.76         | 1            | 3            | 18.29        |
| 6321012   | CHD1    | NP_011091.1 | 0.89         | 1            | 1            | 0            | 0            | 0            | 0            | 0            | 0            | 0            | 0            | 0            | 0.89         |
| 6320499   | SSD1    | NP_010579.1 | 1.92         | 2            | 2            | 0            | 0            | 0            | 0            | 0            | 0            | 0            | 0            | 0            | 6.16         |
| 6323072   | TRX1    | NP_013144.1 | 66.02        | 6            | 40           | 12.62        | 1            | 1            | 33.98        | 3            | 5            | 0            | 0            | 0            | 66.02        |
| 6325238   | VTC3    | NP_015306.1 | 0.96         | 1            | 1            | 0            | 0            | 0            | 0            | 0            | 0            | 0            | 0            | 0            | 3.71         |
| 398365319 | MAK21   | NP_010345.3 | 0            | 0            | 0            | 0            | 0            | 0            | 1.27         | 1            | 2            | 0            | 0            | 0            | 2.34         |
| 398364327 | LSB3    | NP_219497.4 | 14.60        | 5            | 7            | 0            | 0            | 0            | 3.92         | 1            | 1            | 3.92         | 1            | 1            | 8.93         |
| 6319513   | ATP3    | NP_009595.1 | 31.51        | 10           | 41           | 10.61        | 2            | 9            | 12.22        | 3            | 32           | 18.65        | 5            | 11           | 40.84        |
| 6324140   | SRP1    | NP_014210.1 | 8.12         | 4            | 10           | 0            | 0            | 0            | 2.40         | 1            | 1            | 1.48         | 1            | 1            | 7.20         |
| 6324297   | HHT2    | NP_014367.1 | 11.76        | 2            | 10           | 0            | 0            | 0            | 0            | 0            | 0            | 0            | 0            | 0            | 0            |
| 6323306   | DBP9    | NP_013378.1 | 0            | 0            | 0            | 0            | 0            | 0            | 0            | 0            | 0            | 0            | 0            | 0            | 0            |
| 6324039   | RFC3    | NP_014109.1 | 0            | 0            | 0            | 0            | 0            | 0            | 3.82         | 1            | 1            | 0            | 0            | 0            | 0            |
| 6321193   | RTF1    | NP_011270.1 | 1.79         | 1            | 3            | 0            | 0            | 0            | 0            | 0            | 0            | 0            | 0            | 0            | 24.91        |
| 398366149 | TRX2    | NP_011725.3 | 66.35        | 6            | 50           | 11.54        | 1            | 5            | 34.62        | 3            | 6            | 0            | 0            | 0            | 66.35        |
| 6322452   | CCT8    | NP_012526.1 | 24.65        | 12           | 30           | 0            | 0            | 0            | 4.58         | 2            | 6            | 7.92         | 3            | 5            | 30.46        |
| 6321679   | PFK1    | NP_011756.1 | 16.11        | 12           | 31           | 2.03         | 1            | 1            | 2.63         | 2            | 5            | 1.11         | 1            | 1            | 26.65        |
| 6324219   | NOP15   | NP_014289.1 | 4.09         | 1            | 2            | 0            | 0            | 0            | 0            | 0            | 0            | 0            | 0            | 0            | 0            |
| 330443717 | CTR9    | NP_014496.2 | 0.84         | 1            | 1            | 0            | 0            | 0            | 0            | 0            | 0            | 0            | 0            | 0            | 0.84         |
| 6323755   | ILV2    | NP_013826.1 | 13.97        | 9            | 52           | 0            | 0            | 0            | 5.09         | 3            | 54           | 13.39        | 5            | 21           | 28.24        |
| 6320276   | PAA1    | NP_010356.1 | 17.80        | 3            | 10           | 0            | 0            | 0            | 0            | 0            | 0            | 0            | 0            | 0            | 16.23        |
| 6681849   | RPL42A  | NP_014237.2 | 15.09        | 2            | 3            | 0            | 0            | 0            | 0            | 0            | 0            | 0            | 0            | 0            | 22.64        |
| 14318517  | SEC4    | NP_116650.1 | 37.21        | 7            | 34           | 0            | 0            | 0            | 5.58         | 1            | 1            | 5.58         | 1            | 7            | 50.23        |
| 6320400   | MSS116  | NP_010480.1 | 0            | 0            | 0            | 0            | 0            | 0            | 3.77         | 2            | 4            | 0            | 0            | 0            | 14.16        |
| 6321389   | TIF4632 | NP_011466.1 | 0            | 0            | 0            | 0            | 0            | 0            | 0            | 0            | 0            | 0            | 0            | 0            | 0.98         |
| 6324081   | RPA49   | NP_014151.1 | 2.41         | 1            | 2            | 0            | 0            | 0            | 0            | 0            | 0            | 0            | 0            | 0            | 3.61         |
| 398366347 | MES1    | NP_011780.3 | 12.78        | 10           | 32           | 0            | 0            | 0            | 2.80         | 2            | 2            | 3.33         | 2            | 5            | 22.24        |
| 6320418   | TCP1    | NP_010498.1 | 14.49        | 7            | 30           | 0            | 0            | 0            | 3.94         | 2            | 21           | 0            | 0            | 0            | 23.61        |
| 398365595 | PIL1    | NP_011600.3 | 29.50        | 9            | 49           | 2.36         | 1            | 1            | 5.90         | 2            | 4            | 17.11        | 5            | 25           | 39.53        |

Table S1 - Smith-Kinnaman, *et al* (2014) Abbreviations: %SC = percent sequence coverage, UP = unique peptides, PSM = peptide spectrum matches

| Accession | Acronym | NP_value    | %SC          | UP           | # PSM        | %SC          |
|-----------|---------|-------------|--------------|--------------|--------------|--------------|--------------|--------------|--------------|--------------|--------------|--------------|--------------|--------------|--------------|
|           |         |             | BY4741_TAP_1 | BY4741_TAP_1 | BY4741_TAP_1 | BY4741_TAP_2 |
| 398364417 | SAH1    | NP_010961.3 | 13.14        | 5            | 12           | 7.80         | 3            | 10           | 2.67         | 1            | 1            | 0            | 0            | 0            | 5.12         |
| 6320396   | RVB1    | NP_010476.1 | 16.41        | 6            | 25           | 0            | 0            | 0            | 10.37        | 4            | 13           | 21.17        | 5            | 8            | 40.82        |
| 6320077   | CDC48   | NP_010157.1 | 31.62        | 20           | 138          | 12.22        | 8            | 17           | 3.23         | 2            | 7            | 12.22        | 5            | 9            | 35.33        |
| 6325025   | FAS2    | NP_015093.1 | 13.25        | 20           | 37           | 4.40         | 7            | 16           | 0.64         | 1            | 3            | 2.38         | 4            | 4            | 21.78        |
| 6324517   | THI20   | NP_014586.1 | 7.99         | 4            | 4            | 0            | 0            | 0            | 0            | 0            | 0            | 0            | 0            | 0            | 47.19        |
| 6323030   | NOC3    | NP_013102.1 | 1.66         | 1            | 1            | 0            | 0            | 0            | 0            | 0            | 0            | 0            | 0            | 0            | 2.41         |
| 6320143   | TSR1    | NP_010223.1 | 0            | 0            | 0            | 0            | 0            | 0            | 0            | 0            | 0            | 0            | 0            | 0            | 0            |
| 6321318   | PRP43   | NP_011395.1 | 2.87         | 2            | 4            | 0            | 0            | 0            | 0            | 0            | 0            | 0            | 0            | 0            | 3.26         |
| 6319618   | MAK5    | NP_009700.1 | 0            | 0            | 0            | 0            | 0            | 0            | 0            | 0            | 0            | 0            | 0            | 0            | 1.42         |
| 398364755 | URB1    | NP_012911.3 | 0            | 0            | 0            | 0            | 0            | 0            | 0            | 0            | 0            | 0            | 0            | 0            | 0            |
| 6320780   | POL5    | NP_010859.1 | 2.54         | 3            | 3            | 0            | 0            | 0            | 0            | 0            | 0            | 0.98         | 1            | 1            | 1.47         |
| 6325021   | RVB2    | NP_015089.1 | 28.45        | 11           | 28           | 0            | 0            | 0            | 5.10         | 2            | 14           | 4.46         | 2            | 12           | 38.85        |
| 6322350   | CCT7    | NP_012424.1 | 16.55        | 8            | 14           | 0            | 0            | 0            | 9.64         | 4            | 7            | 2.18         | 1            | 1            | 34.91        |
| 14270688  | UTP20   | NP_009551.2 | 0.40         | 1            | 1            | 0            | 0            | 0            | 0            | 0            | 0            | 0            | 0            | 0            | 0.64         |
| 6324197   | KRE33   | NP_014267.1 | 3.31         | 3            | 3            | 0            | 0            | 0            | 0            | 0            | 0            | 0            | 0            | 0            | 3.31         |
| 6321816   | RPN1    | NP_011892.1 | 14.70        | 13           | 36           | 0.70         | 1            | 1            | 4.33         | 5            | 19           | 4.53         | 3            | 5            | 17.22        |
| 6322901   | NAP1    | NP_012974.1 | 31.41        | 9            | 55           | 9.59         | 2            | 4            | 4.08         | 1            | 2            | 0            | 0            | 0            | 36.93        |
| 6320030   | GLT1    | NP_010110.1 | 7.88         | 14           | 19           | 0            | 0            | 0            | 1.68         | 3            | 12           | 0.47         | 1            | 7            | 17.06        |
| 6323470   | CAR2    | NP_013542.1 | 3.07         | 1            | 1            | 0            | 0            | 0            | 0            | 0            | 0            | 0            | 0            | 0            | 6.84         |
| 6320956   | KAP123  | NP_011035.1 | 14.29        | 13           | 39           | 0            | 0            | 0            | 3.50         | 3            | 16           | 0.99         | 1            | 1            | 17.43        |
| 398365941 | SEC7    | NP_010454.3 | 3.58         | 7            | 12           | 0            | 0            | 0            | 0            | 0            | 0            | 0            | 0            | 0            | 0.45         |
| 6323324   | GSP1    | NP_013396.1 | 20.55        | 4            | 15           | 10.05        | 2            | 6            | 0            | 0            | 0            | 9.59         | 2            | 16           | 24.20        |
| 6322697   | GPM1    | NP_012770.1 | 48.99        | 11           | 213          | 46.56        | 10           | 75           | 0            | 0            | 0            | 23.89        | 5            | 20           | 32.39        |
| 6325013   | SRP68   | NP_015081.1 | 1.34         | 1            | 1            | 0            | 0            | 0            | 2.17         | 1            | 2            | 0            | 0            | 0            | 4.51         |
| 6322103   | AVT7    | NP_012178.1 | 1.63         | 1            | 1            | 0            | 0            | 0            | 1.63         | 1            | 1            | 1.63         | 1            | 5            | 1.63         |
| 6322049   | CCT2    | NP_012124.1 | 15.75        | 7            | 31           | 0            | 0            | 0            | 2.28         | 1            | 1            | 10.44        | 4            | 6            | 41.56        |
| 330443694 | SLA2    | NP_014156.2 | 2.07         | 2            | 14           | 0            | 0            | 0            | 0            | 0            | 0            | 0            | 0            | 0            | 15.19        |
| 6321804   | YSC84   | NP_011880.1 | 4.27         | 2            | 3            | 0            | 0            | 0            | 0            | 0            | 0            | 0            | 0            | 0            | 3.85         |
| 398366021 | CCT6    | NP_010474.3 | 6.96         | 4            | 9            | 0            | 0            | 0            | 0            | 0            | 0            | 2.93         | 1            | 1            | 21.79        |
| 6324042   | SEC21   | NP_014112.1 | 6.74         | 5            | 8            | 0            | 0            | 0            | 1.82         | 1            | 1            | 1.28         | 1            | 2            | 10.05        |
| 398364741 | SCS2    | NP_011046.3 | 17.21        | 3            | 7            | 0            | 0            | 0            | 11.48        | 2            | 9            | 0            | 0            | 0            | 17.21        |
| 6325253   | LSP1    | NP_015321.1 | 35.19        | 11           | 57           | 3.52         | 1            | 3            | 0            | 0            | 0            | 9.09         | 3            | 35           | 38.71        |
| 6321390   | RPT6    | NP_011467.1 | 15.80        | 6            | 8            | 0            | 0            | 0            | 6.67         | 2            | 4            | 11.36        | 3            | 6            | 17.04        |
| 398364807 | PNC1    | NP_011478.3 | 0            | 0            | 0            | 0            | 0            | 0            | 0            | 0            | 0            | 0            | 0            | 0            | 17.59        |
| 6325164   | NOG1    | NP_015232.1 | 5.26         | 3            | 6            | 0            | 0            | 0            | 0            | 0            | 0            | 0            | 0            | 0            | 8.81         |
| 6319814   | GRX1    | NP_009895.1 | 0            | 0            | 0            | 0            | 0            | 0            | 0            | 0            | 0            | 0            | 0            | 0            | 0            |
| 6322823   | MAE1    | NP_012896.1 | 12.56        | 7            | 12           | 0            | 0            | 0            | 4.04         | 2            | 8            | 18.98        | 8            | 49           | 18.09        |

Table S1 - Smith-Kinnaman, *et al* (2014) Abbreviations: %SC = percent sequence coverage, UP = unique peptides, PSM = peptide spectrum matches

| Accession | Acronym | NP_value    | %SC          | UP           | # PSM        | %SC          |
|-----------|---------|-------------|--------------|--------------|--------------|--------------|--------------|--------------|--------------|--------------|--------------|--------------|--------------|--------------|--------------|
|           |         |             | BY4741_TAP_1 | BY4741_TAP_1 | BY4741_TAP_1 | BY4741_TAP_2 |
| 6320255   | TPI1    | NP_010335.1 | 23.79        | 5            | 15           | 18.15        | 4            | 20           | 0            | 0            | 0            | 0            | 0            | 0            | 14.52        |
| 6320983   | GDI1    | NP_011062.1 | 5.32         | 2            | 3            | 1.77         | 1            | 1            | 0            | 0            | 0            | 0            | 0            | 0            | 8.65         |
| 398365205 | RPT5    | NP_014760.3 | 30.88        | 10           | 22           | 0            | 0            | 0            | 8.29         | 3            | 6            | 24.19        | 9            | 21           | 36.87        |
| 6324992   | KEL3    | NP_015060.1 | 0            | 0            | 0            | 0            | 0            | 0            | 0            | 0            | 0            | 0            | 0            | 0            | 1.54         |
| 6323028   | DNM1    | NP_013100.1 | 5.94         | 4            | 5            | 0            | 0            | 0            | 1.59         | 1            | 2            | 0            | 0            | 0            | 3.43         |
| 398365977 | RPT4    | NP_014902.3 | 7.78         | 3            | 7            | 0            | 0            | 0            | 0            | 0            | 0            | 9.61         | 3            | 6            | 10.07        |
| 6320058   | CCT4    | NP_010138.1 | 9.66         | 4            | 12           | 0            | 0            | 0            | 5.30         | 2            | 23           | 2.84         | 1            | 6            | 17.05        |
| 6320379   | HMO1    | NP_010459.1 | 8.54         | 2            | 3            | 0            | 0            | 0            | 0            | 0            | 0            | 0            | 0            | 0            | 13.41        |
| 6322508   | CYC1    | NP_012582.1 | 0            | 0            | 0            | 0            | 0            | 0            | 0            | 0            | 0            | 0            | 0            | 0            | 0            |
| 6325137   | VPS30   | NP_015205.1 | 0            | 0            | 0            | 0            | 0            | 0            | 2.51         | 1            | 3            | 0            | 0            | 0            | 0            |
| 6321301   | SEC27   | NP_011378.1 | 13.39        | 11           | 57           | 0            | 0            | 0            | 3.04         | 2            | 12           | 1.12         | 1            | 1            | 13.39        |
| 6321673   | YHB1    | NP_011750.1 | 11.03        | 3            | 5            | 0            | 0            | 0            | 0            | 0            | 0            | 4.26         | 1            | 1            | 7.27         |
| 27469359  | SYN8    | NP_009388.2 | 2.75         | 1            | 2            | 0            | 0            | 0            | 0            | 0            | 0            | 0            | 0            | 0            | 0            |
| 6324433   | CDC33   | NP_014502.1 | 27.70        | 5            | 10           | 0            | 0            | 0            | 11.27        | 2            | 12           | 0            | 0            | 0            | 18.78        |
| 6323571   | POB3    | NP_013642.1 | 3.08         | 2            | 2            | 0            | 0            | 0            | 0            | 0            | 0            | 0            | 0            | 0            | 9.60         |
| 398365157 | NOP2    | NP_014338.3 | 3.72         | 2            | 2            | 0            | 0            | 0            | 0            | 0            | 0            | 0            | 0            | 0            | 8.09         |
| 6321228   | YPT32   | NP_011305.1 | 31.98        | 6            | 26           | 0            | 0            | 0            | 11.71        | 2            | 6            | 15.32        | 3            | 9            | 35.14        |
| 398366559 | RPT3    | NP_010682.3 | 2.80         | 1            | 2            | 0            | 0            | 0            | 2.80         | 1            | 1            | 12.62        | 3            | 13           | 18.69        |
| 6322704   | RPT1    | NP_012777.1 | 27.41        | 9            | 19           | 0            | 0            | 0            | 2.78         | 1            | 2            | 0            | 0            | 0            | 20.99        |
| 398366379 | PRT1    | NP_015006.3 | 13.50        | 10           | 19           | 0            | 0            | 0            | 4.98         | 3            | 12           | 1.31         | 1            | 1            | 27.65        |
| 398365125 | PDA1    | NP_011105.4 | 24.52        | 9            | 30           | 0            | 0            | 0            | 4.29         | 1            | 1            | 0            | 0            | 0            | 20.95        |
| 398364913 | GND1    | NP_012053.3 | 10.02        | 4            | 15           | 5.73         | 2            | 4            | 0            | 0            | 0            | 0            | 0            | 0            | 17.18        |
| 6322637   | SAC1    | NP_012710.1 | 13.48        | 6            | 9            | 0            | 0            | 0            | 0            | 0            | 0            | 0            | 0            | 0            | 6.74         |
| 398365933 | CYS4    | NP_011671.3 | 48.32        | 21           | 125          | 4.34         | 1            | 2            | 8.48         | 3            | 3            | 5.52         | 2            | 16           | 52.47        |
| 6323903   | FAA4    | NP_013974.1 | 7.49         | 5            | 20           | 0            | 0            | 0            | 1.44         | 1            | 6            | 1.73         | 1            | 2            | 11.10        |
| 6319806   | PDI1    | NP_009887.1 | 36.02        | 16           | 98           | 4.21         | 1            | 4            | 8.81         | 3            | 12           | 0            | 0            | 0            | 34.87        |
| 6323512   | PHO84   | NP_013583.1 | 0            | 0            | 0            | 0            | 0            | 0            | 0            | 0            | 0            | 2.90         | 1            | 1            | 0            |
| 6325367   | RPC40   | NP_015435.1 | 13.43        | 4            | 8            | 0            | 0            | 0            | 0            | 0            | 0            | 0            | 0            | 0            | 19.10        |
| 6319835   | GBP2    | NP_009916.1 | 2.11         | 1            | 1            | 0            | 0            | 0            | 0            | 0            | 0            | 0            | 0            | 0            | 5.85         |
| 6319290   | MYO4    | NP_009373.1 | 1.02         | 1            | 3            | 0            | 0            | 0            | 0            | 0            | 0            | 0            | 0            | 0            | 0            |
| 14318531  | GCN20   | NP_116664.1 | 5.19         | 4            | 6            | 0            | 0            | 0            | 3.32         | 2            | 6            | 1.20         | 1            | 4            | 6.38         |
| 6320869   | YPT31   | NP_010948.1 | 32.29        | 6            | 26           | 0            | 0            | 0            | 11.66        | 2            | 6            | 15.25        | 3            | 9            | 49.33        |
| 398365617 | UTP22   | NP_011604.3 | 0            | 0            | 0            | 0            | 0            | 0            | 0            | 0            | 0            | 0            | 0            | 0            | 1.62         |
| 398366209 | RTN1    | NP_010519.3 | 20.68        | 6            | 37           | 9.83         | 2            | 6            | 9.83         | 2            | 16           | 9.83         | 2            | 7            | 13.22        |
| 6325097   | CDC60   | NP_015165.1 | 17.43        | 17           | 40           | 2.39         | 1            | 1            | 2.11         | 2            | 7            | 2.02         | 1            | 1            | 17.61        |
| 6323294   | RPS28B  | NP_013366.1 | 31.34        | 2            | 45           | 41.79        | 3            | 7            | 13.43        | 1            | 15           | 0            | 0            | 0            | 31.34        |
| 6325151   | SSE1    | NP_015219.1 | 36.08        | 24           | 184          | 9.24         | 4            | 5            | 11.40        | 6            | 16           | 8.23         | 5            | 46           | 41.56        |







Table S1 - Smith-Kinnaman, *et al* (2014) Abbreviations: %SC = percent sequence coverage, UP = unique peptides, PSM = peptide spectrum matches

| Accession | Acronym | NP_value    | %SC          | UP           | # PSM        | %SC          |
|-----------|---------|-------------|--------------|--------------|--------------|--------------|--------------|--------------|--------------|--------------|--------------|--------------|--------------|--------------|--------------|
|           |         |             | BY4741_TAP_1 | BY4741_TAP_1 | BY4741_TAP_1 | BY4741_TAP_2 |
| 398364441 | NOT3    | NP_012226.3 | 3.71         | 2            | 4            | 0            | 0            | 0            | 0            | 0            | 0            | 0            | 0            | 0            | 13.16        |
| 398366191 | RPN13   | NP_013525.3 | 15.38        | 2            | 4            | 0            | 0            | 0            | 8.33         | 1            | 1            | 0            | 0            | 0            | 8.33         |
| 6321453   | YGR016W | NP_011530.1 | 0            | 0            | 0            | 0            | 0            | 0            | 0            | 0            | 0            | 0            | 0            | 0            | 0            |
| 6320930   | ILV1    | NP_011009.1 | 18.06        | 8            | 11           | 0            | 0            | 0            | 2.43         | 1            | 3            | 13.19        | 5            | 76           | 33.85        |
| 6323016   | PUF3    | NP_013088.1 | 3.19         | 2            | 4            | 0            | 0            | 0            | 0            | 0            | 0            | 0            | 0            | 0            | 1.14         |
| 37362700  | SRP72   | NP_015114.2 | 0            | 0            | 0            | 0            | 0            | 0            | 0            | 0            | 0            | 0            | 0            | 0            | 0            |
| 6321326   | TAF6    | NP_011403.1 | 3.49         | 1            | 1            | 0            | 0            | 0            | 0            | 0            | 0            | 0            | 0            | 0            | 8.91         |
| 6322565   | ADO1    | NP_012639.1 | 15.59        | 4            | 11           | 7.35         | 2            | 5            | 0            | 0            | 0            | 0            | 0            | 0            | 0            |
| 6319722   | ISW1    | NP_009804.1 | 1.06         | 1            | 1            | 0            | 0            | 0            | 0.89         | 1            | 1            | 0            | 0            | 0            | 4.34         |
| 330443605 | SET2    | NP_012367.2 | 0            | 0            | 0            | 0            | 0            | 0            | 0            | 0            | 0            | 0            | 0            | 0            | 3.68         |
| 398365101 | ARP3    | NP_012599.3 | 9.58         | 4            | 10           | 2.45         | 1            | 1            | 0            | 0            | 0            | 0            | 0            | 0            | 6.68         |
| 6321780   | STE20   | NP_011856.1 | 3.30         | 2            | 2            | 0            | 0            | 0            | 0            | 0            | 0            | 0            | 0            | 0            | 0            |
| 6321776   | PRS3    | NP_011852.1 | 14.69        | 5            | 13           | 0            | 0            | 0            | 0            | 0            | 0            | 10.31        | 3            | 9            | 22.19        |
| 6323214   | RPL37A  | NP_013286.1 | 21.59        | 2            | 7            | 13.64        | 1            | 1            | 11.36        | 1            | 1            | 0            | 0            | 0            | 0            |
| 6321757   | ECM29   | NP_011833.1 | 0.75         | 1            | 1            | 0            | 0            | 0            | 0.59         | 1            | 1            | 0            | 0            | 0            | 0            |
| 398365069 | ADH5    | NP_009703.3 | 5.70         | 2            | 16           | 2.28         | 1            | 1            | 0            | 0            | 0            | 2.28         | 1            | 1            | 5.70         |
| 398365695 | CPR8    | NP_014425.3 | 3.57         | 1            | 1            | 0            | 0            | 0            | 0            | 0            | 0            | 0            | 0            | 0            | 0            |
| 6319854   | RVS161  | NP_009935.1 | 10.19        | 3            | 3            | 0            | 0            | 0            | 3.40         | 1            | 2            | 7.92         | 1            | 2            | 19.62        |
| 6324620   | DBP5    | NP_014689.1 | 19.50        | 7            | 16           | 0            | 0            | 0            | 5.19         | 2            | 2            | 11.62        | 4            | 6            | 17.43        |
| 6321399   | YGL039W | NP_011476.1 | 6.90         | 2            | 3            | 0            | 0            | 0            | 0            | 0            | 0            | 0            | 0            | 0            | 9.20         |
| 398365061 | SUP45   | NP_009701.3 | 16.25        | 8            | 26           | 0            | 0            | 0            | 2.97         | 1            | 4            | 2.97         | 1            | 11           | 40.27        |
| 6324673   | KTR1    | NP_014742.1 | 15.01        | 6            | 16           | 0            | 0            | 0            | 0            | 0            | 0            | 0            | 0            | 0            | 16.54        |
| 6323387   | ILV5    | NP_013459.1 | 13.67        | 5            | 9            | 0            | 0            | 0            | 0            | 0            | 0            | 0            | 0            | 0            | 28.10        |
| 6323795   | TIF34   | NP_013866.1 | 20.46        | 6            | 22           | 0            | 0            | 0            | 2.31         | 1            | 1            | 2.31         | 1            | 1            | 38.62        |
| 6322667   | PRS1    | NP_012740.1 | 5.15         | 2            | 4            | 0            | 0            | 0            | 3.28         | 1            | 18           | 2.58         | 1            | 2            | 16.39        |
| 6320910   | RGI1    | NP_010990.1 | 8.07         | 1            | 2            | 0            | 0            | 0            | 0            | 0            | 0            | 0            | 0            | 0            | 0            |
| 398365575 | HOM6    | NP_012673.3 | 0            | 0            | 0            | 10.03        | 2            | 3            | 0            | 0            | 0            | 0            | 0            | 0            | 0            |
| 6323916   | TIF11   | NP_013987.1 | 6.54         | 1            | 1            | 0            | 0            | 0            | 0            | 0            | 0            | 0            | 0            | 0            | 15.03        |
| 6321612   | RBG2    | NP_011689.1 | 2.72         | 1            | 2            | 0            | 0            | 0            | 0            | 0            | 0            | 0            | 0            | 0            | 14.95        |
| 6323225   | PWP1    | NP_013297.1 | 11.28        | 5            | 7            | 0            | 0            | 0            | 3.99         | 1            | 1            | 0            | 0            | 0            | 13.89        |
| 6324737   | SSP1    | NP_014806.1 | 12.23        | 2            | 5            | 0            | 0            | 0            | 0            | 0            | 0            | 0            | 0            | 0            | 0            |
| 6323450   | CDC73   | NP_013522.1 | 5.09         | 2            | 2            | 0            | 0            | 0            | 0            | 0            | 0            | 5.34         | 1            | 1            | 5.60         |
| 398365461 | SRP40   | NP_013018.3 | 8.62         | 2            | 5            | 0            | 0            | 0            | 0            | 0            | 0            | 0            | 0            | 0            | 2.96         |
| 6320708   | RPL37B  | NP_010788.1 | 0            | 0            | 0            | 0            | 0            | 0            | 18.18        | 2            | 2            | 0            | 0            | 0            | 0            |
| 398364957 | MKT1    | NP_014314.3 | 6.14         | 4            | 5            | 0            | 0            | 0            | 2.53         | 1            | 3            | 1.20         | 1            | 1            | 4.10         |
| 6320079   | YDL124W | NP_010159.1 | 7.37         | 2            | 2            | 0            | 0            | 0            | 0            | 0            | 0            | 0            | 0            | 0            | 4.49         |
| 398364371 | RSC8    | NP_116695.3 | 6.82         | 3            | 6            | 0            | 0            | 0            | 1.97         | 1            | 1            | 2.51         | 1            | 1            | 5.21         |

Table S1 - Smith-Kinnaman, *et al* (2014) Abbreviations: %SC = percent sequence coverage, UP = unique peptides, PSM = peptide spectrum matches

| Accession | Acronym | NP_value    | %SC          | UP           | # PSM        | %SC          |
|-----------|---------|-------------|--------------|--------------|--------------|--------------|--------------|--------------|--------------|--------------|--------------|--------------|--------------|--------------|--------------|
|           |         |             | BY4741_TAP_1 | BY4741_TAP_1 | BY4741_TAP_1 | BY4741_TAP_2 |
| 6325418   | GPH1    | NP_015486.1 | 1.55         | 1            | 1            | 0            | 0            | 0            | 0            | 0            | 0            | 1.11         | 1            | 2            | 11.97        |
| 6321859   | DYS1    | NP_011935.1 | 14.21        | 5            | 11           | 0            | 0            | 0            | 0            | 0            | 0            | 0            | 0            | 0            | 8.01         |
| 6323967   | GAS1    | NP_014038.1 | 13.06        | 8            | 67           | 0            | 0            | 0            | 0            | 0            | 0            | 0            | 0            | 0            | 17.53        |
| 6319695   | PYC2    | NP_009777.1 | 10.00        | 10           | 21           | 3.81         | 4            | 11           | 1.44         | 2            | 2            | 3.73         | 3            | 5            | 10.68        |
| 6323642   | YPT7    | NP_013713.1 | 51.44        | 8            | 63           | 0            | 0            | 0            | 5.29         | 1            | 1            | 28.85        | 5            | 67           | 60.10        |
| 6320552   | HXT3    | NP_010632.1 | 2.12         | 1            | 10           | 0            | 0            | 0            | 2.12         | 1            | 1            | 0            | 0            | 0            | 2.12         |
| 6325196   | ALD6    | NP_015264.1 | 9.20         | 4            | 8            | 6.60         | 3            | 7            | 0            | 0            | 0            | 2.20         | 1            | 2            | 6.60         |
| 6319315   | EFB1    | NP_009398.1 | 17.96        | 3            | 10           | 8.25         | 1            | 11           | 0            | 0            | 0            | 10.68        | 1            | 1            | 23.30        |
| 10383811  | CDC39   | NP_010017.2 | 0.71         | 1            | 1            | 0            | 0            | 0            | 0            | 0            | 0            | 0            | 0            | 0            | 1.42         |
| 6321753   | SBP1    | NP_011829.1 | 3.06         | 1            | 6            | 0            | 0            | 0            | 0            | 0            | 0            | 0            | 0            | 0            | 23.47        |
| 6320764   | DLD3    | NP_010843.1 | 2.82         | 1            | 1            | 0            | 0            | 0            | 0            | 0            | 0            | 0            | 0            | 0            | 2.22         |
| 398366413 | ERV29   | NP_011800.3 | 0            | 0            | 0            | 0            | 0            | 0            | 3.87         | 1            | 2            | 0            | 0            | 0            | 0            |
| 6320969   | GLO3    | NP_011048.1 | 7.51         | 4            | 9            | 0            | 0            | 0            | 0            | 0            | 0            | 1.42         | 1            | 7            | 1.42         |
| 6319602   | TPS1    | NP_009684.1 | 13.54        | 5            | 9            | 0            | 0            | 0            | 0            | 0            | 0            | 0            | 0            | 0            | 15.76        |
| 6579193   | NMD2    | NP_011944.2 | 0            | 0            | 0            | 0            | 0            | 0            | 0            | 0            | 0            | 0            | 0            | 0            | 0            |
| 6321990   | UTP9    | NP_012066.1 | 4.35         | 2            | 2            | 0            | 0            | 0            | 0            | 0            | 0            | 0            | 0            | 0            | 7.30         |
| 398366561 | SXM1    | NP_010683.3 | 2.33         | 2            | 2            | 0            | 0            | 0            | 0            | 0            | 0            | 0            | 0            | 0            | 0            |
| 6320157   | NPC2    | NP_010237.1 | 0            | 0            | 0            | 0            | 0            | 0            | 0            | 0            | 0            | 0            | 0            | 0            | 0            |
| 398364687 | NOP9    | NP_012524.3 | 1.50         | 1            | 1            | 0            | 0            | 0            | 0            | 0            | 0            | 0            | 0            | 0            | 0            |
| 22532997  | BUD27   | NP_683715.1 | 0            | 0            | 0            | 0            | 0            | 0            | 0            | 0            | 0            | 0            | 0            | 0            | 0            |
| 398366449 | BFR2    | NP_010585.3 | 8.43         | 4            | 4            | 0            | 0            | 0            | 0            | 0            | 0            | 0            | 0            | 0            | 5.62         |
| 398365717 | TRM1    | NP_010405.3 | 13.16        | 7            | 14           | 0            | 0            | 0            | 0            | 0            | 0            | 0            | 0            | 0            | 5.44         |
| 6323362   | CHS5    | NP_013434.1 | 3.58         | 2            | 3            | 0            | 0            | 0            | 0            | 0            | 0            | 0            | 0            | 0            | 0            |
| 398364573 | PAN1    | NP_012271.3 | 8.18         | 9            | 52           | 0            | 0            | 0            | 0            | 0            | 0            | 0            | 0            | 0            | 5.20         |
| 6320720   | GRX2    | NP_010801.1 | 6.99         | 1            | 1            | 0            | 0            | 0            | 0            | 0            | 0            | 0            | 0            | 0            | 6.99         |
| 6321595   | PTI1    | NP_011672.1 | 1.65         | 1            | 1            | 0            | 0            | 0            | 0            | 0            | 0            | 0            | 0            | 0            | 0            |
| 398364853 | OCA1    | NP_014300.3 | 5.46         | 1            | 1            | 0            | 0            | 0            | 0            | 0            | 0            | 0            | 0            | 0            | 5.46         |
| 6323852   | YMR196  | NP_013923.1 | 2.76         | 2            | 2            | 0            | 0            | 0            | 0            | 0            | 0            | 0.92         | 1            | 1            | 0            |
| 33438816  | YI002W- | NP_878098.1 | 17.39        | 1            | 1            | 0            | 0            | 0            | 0            | 0            | 0            | 0            | 0            | 0            | 0            |
| 398366575 | RRP17   | NP_010700.3 | 0            | 0            | 0            | 0            | 0            | 0            | 0            | 0            | 0            | 0            | 0            | 0            | 0            |
| 6323359   | TMA10   | NP_013431.1 | 0            | 0            | 0            | 0            | 0            | 0            | 0            | 0            | 0            | 0            | 0            | 0            | 0            |
| 398365853 | WTM1    | NP_014873.3 | 19.91        | 8            | 36           | 12.13        | 4            | 16           | 0            | 0            | 0            | 2.29         | 1            | 1            | 12.59        |
| 6320181   | GPD1    | NP_010262.1 | 4.09         | 2            | 11           | 0            | 0            | 0            | 0            | 0            | 0            | 0            | 0            | 0            | 31.20        |
| 6323518   | NAB6    | NP_013589.1 | 1.23         | 1            | 1            | 0            | 0            | 0            | 1.23         | 1            | 1            | 0.88         | 1            | 4            | 3.35         |
| 6321221   | KIP3    | NP_011299.1 | 0            | 0            | 0            | 0            | 0            | 0            | 0            | 0            | 0            | 0            | 0            | 0            | 0            |
| 398365131 | RFC2    | NP_012602.3 | 7.08         | 2            | 2            | 0            | 0            | 0            | 0            | 0            | 0            | 0            | 0            | 0            | 0            |
| 6322294   | ERG20   | NP_012368.1 | 2.84         | 1            | 2            | 0            | 0            | 0            | 0            | 0            | 0            | 7.95         | 1            | 1            | 12.22        |

Table S1 - Smith-Kinnaman, *et al* (2014) Abbreviations: %SC = percent sequence coverage, UP = unique peptides, PSM = peptide spectrum matches

| Accession | Acronym | NP_value    | %SC          | UP           | # PSM        | %SC          |
|-----------|---------|-------------|--------------|--------------|--------------|--------------|--------------|--------------|--------------|--------------|--------------|--------------|--------------|--------------|--------------|
|           |         |             | BY4741_TAP_1 | BY4741_TAP_1 | BY4741_TAP_1 | BY4741_TAP_2 |
| 6321024   | ECM32   | NP_011103.1 | 0            | 0            | 0            | 0            | 0            | 0            | 0            | 0            | 0            | 0            | 0            | 0            | 0            |
| 37362660  | FUR1    | NP_011996.2 | 15.74        | 4            | 7            | 0            | 0            | 0            | 0            | 0            | 0            | 0            | 0            | 0            | 22.69        |
| 398364665 | SEC18   | NP_009636.3 | 6.20         | 4            | 12           | 0            | 0            | 0            | 1.72         | 1            | 1            | 5.28         | 3            | 5            | 18.73        |
| 6323391   | ADE13   | NP_013463.1 | 1.87         | 1            | 2            | 4.15         | 2            | 3            | 0            | 0            | 0            | 0            | 0            | 0            | 0            |
| 6323699   | STV1    | NP_013770.1 | 4.83         | 4            | 8            | 0            | 0            | 0            | 0            | 0            | 0            | 0            | 0            | 0            | 3.37         |
| 6321412   | TRP5    | NP_011489.1 | 26.31        | 14           | 59           | 2.83         | 2            | 2            | 3.25         | 2            | 10           | 1.98         | 1            | 2            | 35.50        |
| 6321973   | OYE2    | NP_012049.1 | 11.75        | 4            | 5            | 0            | 0            | 0            | 4.25         | 1            | 1            | 0            | 0            | 0            | 0            |
| 6321801   | ARD1    | NP_011877.1 | 0            | 0            | 0            | 0            | 0            | 0            | 0            | 0            | 0            | 0            | 0            | 0            | 0            |
| 10383761  | HIS4    | NP_009900.2 | 5.26         | 4            | 5            | 7.13         | 4            | 12           | 0            | 0            | 0            | 0            | 0            | 0            | 8.14         |
| 398365759 | SAC6    | NP_010414.3 | 15.42        | 9            | 25           | 0            | 0            | 0            | 2.02         | 1            | 1            | 2.34         | 1            | 1            | 18.85        |
| 6321721   | BGL2    | NP_011798.1 | 10.22        | 3            | 7            | 4.15         | 1            | 6            | 0            | 0            | 0            | 3.83         | 1            | 1            | 7.99         |
| 398364979 | CCZ1    | NP_009689.3 | 1.42         | 1            | 1            | 0            | 0            | 0            | 0            | 0            | 0            | 0            | 0            | 0            | 1.42         |
| 42742256  | VTC4    | NP_012522.2 | 4.85         | 3            | 5            | 0            | 0            | 0            | 0            | 0            | 0            | 0            | 0            | 0            | 2.36         |
| 6321814   | THR1    | NP_011890.1 | 1.96         | 1            | 1            | 0            | 0            | 0            | 0            | 0            | 0            | 0            | 0            | 0            | 5.32         |
| 10383798  | PHO87   | NP_009966.2 | 0            | 0            | 0            | 0            | 0            | 0            | 0            | 0            | 0            | 0            | 0            | 0            | 0            |
| 6319847   | CDC10   | NP_009928.1 | 6.83         | 2            | 2            | 0            | 0            | 0            | 2.80         | 1            | 1            | 0            | 0            | 0            | 15.53        |
| 398365363 | URA8    | NP_012637.4 | 4.15         | 2            | 2            | 0            | 0            | 0            | 0            | 0            | 0            | 0            | 0            | 0            | 11.94        |
| 6323138   | AHP1    | NP_013210.1 | 5.11         | 1            | 1            | 25.00        | 3            | 7            | 0            | 0            | 0            | 0            | 0            | 0            | 29.55        |
| 6320657   | UTP6    | NP_010737.1 | 1.59         | 1            | 2            | 0            | 0            | 0            | 0            | 0            | 0            | 0            | 0            | 0            | 0            |
| 6321919   | YHR127W | NP_011995.1 | 0            | 0            | 0            | 0            | 0            | 0            | 0            | 0            | 0            | 0            | 0            | 0            | 0            |
| 41629688  | PSP2    | NP_013695.2 | 0            | 0            | 0            | 0            | 0            | 0            | 0            | 0            | 0            | 0            | 0            | 0            | 1.69         |
| 398364633 | APS3    | NP_012510.3 | 0            | 0            | 0            | 0            | 0            | 0            | 0            | 0            | 0            | 0            | 0            | 0            | 0            |
| 6322843   | MRT4    | NP_012916.1 | 13.14        | 3            | 8            | 0            | 0            | 0            | 0            | 0            | 0            | 0            | 0            | 0            | 16.10        |
| 330443486 | PAT1    | NP_010002.3 | 3.27         | 2            | 3            | 0            | 0            | 0            | 0            | 0            | 0            | 1.76         | 1            | 1            | 2.01         |
| 37362659  | RRP3    | NP_011932.2 | 2.59         | 1            | 2            | 0            | 0            | 0            | 0            | 0            | 0            | 4.39         | 2            | 13           | 0            |
| 6320845   | SEC3    | NP_010924.1 | 0            | 0            | 0            | 0            | 0            | 0            | 0            | 0            | 0            | 0.60         | 1            | 8            | 0            |
| 6324791   | RFC1    | NP_014860.1 | 0            | 0            | 0            | 0            | 0            | 0            | 1.51         | 1            | 2            | 0            | 0            | 0            | 0            |
| 6325369   | MRD1    | NP_015437.1 | 0            | 0            | 0            | 0            | 0            | 0            | 0            | 0            | 0            | 0            | 0            | 0            | 1.58         |
| 6322635   | YRA2    | NP_012708.1 | 5.42         | 1            | 1            | 0            | 0            | 0            | 0            | 0            | 0            | 0            | 0            | 0            | 0            |
| 6320368   | SEC1    | NP_010448.1 | 0            | 0            | 0            | 0            | 0            | 0            | 1.80         | 1            | 1            | 0            | 0            | 0            | 0            |
| 398364935 | UBP3    | NP_011078.3 | 1.32         | 1            | 1            | 0            | 0            | 0            | 1.21         | 1            | 1            | 0            | 0            | 0            | 5.04         |
| 6320789   | GLY1    | NP_010868.1 | 22.22        | 7            | 13           | 0            | 0            | 0            | 0            | 0            | 0            | 0            | 0            | 0            | 17.57        |
| 6325172   | SEC16   | NP_015240.1 | 0.46         | 1            | 1            | 0            | 0            | 0            | 0            | 0            | 0            | 0            | 0            | 0            | 0            |
| 398364311 | TMA20   | NP_010923.3 | 6.63         | 1            | 1            | 0            | 0            | 0            | 0            | 0            | 0            | 0            | 0            | 0            | 12.71        |
| 6320926   | UTP7    | NP_011005.1 | 3.97         | 2            | 3            | 0            | 0            | 0            | 0            | 0            | 0            | 0            | 0            | 0            | 0            |
| 330443568 | ENP2    | NP_011661.2 | 0            | 0            | 0            | 0            | 0            | 0            | 0            | 0            | 0            | 0            | 0            | 0            | 0            |
| 6324328   | CIT1    | NP_014398.1 | 2.51         | 1            | 1            | 3.13         | 1            | 1            | 0            | 0            | 0            | 0            | 0            | 0            | 2.09         |

















Table S1 - Smith-Kinnaman, *et al* (2014) Abbreviations: %SC = percent sequence coverage, UP = unique peptides, PSM = peptide spectrum matches

| Accession | Acronym   | NP_value    | %SC          | UP           | # PSM        | %SC          |
|-----------|-----------|-------------|--------------|--------------|--------------|--------------|--------------|--------------|--------------|--------------|--------------|--------------|--------------|--------------|--------------|
|           |           |             | BY4741_TAP_1 | BY4741_TAP_1 | BY4741_TAP_1 | BY4741_TAP_2 |
| 6320843   | PAC2      | NP_010922.1 | 0            | 0            | 0            | 0            | 0            | 0            | 0            | 0            | 0            | 0            | 0            | 0            | 0            |
| 398365529 | SIR1      | NP_013027.4 | 0            | 0            | 0            | 0            | 0            | 0            | 0            | 0            | 0            | 0            | 0            | 0            | 0            |
| 14318435  | TIP20     | NP_116577.1 | 1.71         | 1            | 1            | 0            | 0            | 0            | 0            | 0            | 0            | 0            | 0            | 0            | 0            |
| 6323645   | AIM34     | NP_013716.1 | 0            | 0            | 0            | 0            | 0            | 0            | 0            | 0            | 0            | 0            | 0            | 0            | 0            |
| 330443386 | BUD14     | NP_009408.3 | 0            | 0            | 0            | 0            | 0            | 0            | 0            | 0            | 0            | 0            | 0            | 0            | 0            |
| 6319751   | CHK1      | NP_009833.1 | 0            | 0            | 0            | 0            | 0            | 0            | 0            | 0            | 0            | 0            | 0            | 0            | 0            |
| 6319452   | APN2      | NP_009534.1 | 0            | 0            | 0            | 0            | 0            | 0            | 0            | 0            | 0            | 0            | 0            | 0            | 0            |
| 10383783  | YCR015C   | NP_009941.2 | 0            | 0            | 0            | 0            | 0            | 0            | 0            | 0            | 0            | 0            | 0            | 0            | 0            |
| 33438820  | YJL133C-A | NP_878102.1 | 0            | 0            | 0            | 0            | 0            | 0            | 0            | 0            | 0            | 0            | 0            | 0            | 0            |
| 398365435 | ERG25     | NP_011574.3 | 0            | 0            | 0            | 0            | 0            | 0            | 0            | 0            | 0            | 0            | 0            | 0            | 0            |
| 6321363   | MPS2      | NP_011440.1 | 0            | 0            | 0            | 0            | 0            | 0            | 0            | 0            | 0            | 0            | 0            | 0            | 0            |
| 6323180   | PCD1      | NP_013252.1 | 0            | 0            | 0            | 0            | 0            | 0            | 0            | 0            | 0            | 0            | 0            | 0            | 0            |
| 398364799 | PMD1      | NP_011058.3 | 0            | 0            | 0            | 0            | 0            | 0            | 0            | 0            | 0            | 0            | 0            | 0            | 0            |
| 6322709   | TGL1      | NP_012782.1 | 0            | 0            | 0            | 0            | 0            | 0            | 0            | 0            | 0            | 0            | 0            | 0            | 0            |
| 6325305   | TAH18     | NP_015373.1 | 1.77         | 1            | 1            | 0            | 0            | 0            | 0            | 0            | 0            | 0            | 0            | 0            | 0            |
| 6322698   | YKL151C   | NP_012771.1 | 0            | 0            | 0            | 0            | 0            | 0            | 0            | 0            | 0            | 0            | 0            | 0            | 0            |
| 6322341   | RPE1      | NP_012414.1 | 0            | 0            | 0            | 5.46         | 1            | 1            | 0            | 0            | 0            | 0            | 0            | 0            | 8.40         |
| 6323336   | STT4      | NP_013408.1 | 1.21         | 2            | 2            | 0            | 0            | 0            | 0            | 0            | 0            | 0            | 0            | 0            | 0            |
| 6320542   | MSN5      | NP_010622.1 | 0            | 0            | 0            | 0            | 0            | 0            | 0            | 0            | 0            | 0            | 0            | 0            | 0            |
| 6325171   | ELP3      | NP_015239.1 | 0            | 0            | 0            | 0            | 0            | 0            | 0            | 0            | 0            | 0            | 0            | 0            | 0            |
| 6319274   | ERV46     | NP_009358.1 | 6.51         | 2            | 2            | 0            | 0            | 0            | 0            | 0            | 0            | 0            | 0            | 0            | 3.13         |
| 398366207 | CRM1      | NP_011734.3 | 2.40         | 2            | 6            | 0            | 0            | 0            | 1.29         | 1            | 1            | 0            | 0            | 0            | 4.24         |
| 6321198   | CSE1      | NP_011276.1 | 3.54         | 3            | 4            | 0            | 0            | 0            | 0            | 0            | 1.25         | 1            | 5            | 2.92         | 0            |
| 398366491 | SKP1      | NP_010615.3 | 15.46        | 2            | 7            | 0            | 0            | 0            | 0            | 0            | 0            | 0            | 0            | 0            | 36.08        |
| 6323819   | MLH1      | NP_013890.1 | 0            | 0            | 0            | 0            | 0            | 0            | 0            | 0            | 0            | 0            | 0            | 0            | 0            |
| 398365033 | IRA1      | NP_009698.3 | 0            | 0            | 0            | 0            | 0            | 0            | 0            | 0            | 0            | 0            | 0            | 0            | 0            |
| 398366427 | SRP101    | NP_010578.3 | 0            | 0            | 0            | 0            | 0            | 0            | 0            | 0            | 1.45         | 1            | 1            | 0            | 0            |
| 6320008   | NUS1      | NP_010088.1 | 4.27         | 1            | 1            | 0            | 0            | 0            | 0            | 0            | 0            | 0            | 0            | 0            | 4.00         |
| 6324098   | PDR16     | NP_014168.1 | 5.70         | 2            | 2            | 0            | 0            | 0            | 3.42         | 1            | 4            | 0            | 0            | 0            | 17.38        |
| 6324093   | SIN4      | NP_014163.1 | 0            | 0            | 0            | 0            | 0            | 0            | 0            | 0            | 0            | 0            | 0            | 0            | 0            |
| 6322063   | MET18     | NP_012138.1 | 0            | 0            | 0            | 0            | 0            | 0            | 0            | 0            | 1.26         | 1            | 1            | 0            | 0            |
| 6319901   | THR4      | NP_009982.1 | 6.03         | 4            | 10           | 3.70         | 1            | 2            | 0            | 0            | 0            | 0            | 0            | 0            | 7.39         |
| 6321899   | CDC12     | NP_011975.1 | 17.20        | 5            | 6            | 0            | 0            | 0            | 0            | 0            | 0            | 0            | 0            | 0            | 16.71        |
| 398364305 | YND1      | NP_010920.3 | 0            | 0            | 0            | 0            | 0            | 0            | 0            | 0            | 1.27         | 1            | 2            | 1.27         | 0            |
| 6325365   | RPN7      | NP_015433.1 | 12.35        | 6            | 12           | 0            | 0            | 0            | 3.03         | 1            | 2            | 0            | 0            | 0            | 19.35        |
| 6322288   | RFA3      | NP_012362.1 | 38.52        | 3            | 3            | 0            | 0            | 0            | 0            | 0            | 0            | 0            | 0            | 0            | 12.30        |
| 6323832   | YMR178    | NP_013903.1 | 0            | 0            | 0            | 0            | 0            | 0            | 6.20         | 1            | 1            | 0            | 0            | 0            | 16.42        |











Table S1 - Smith-Kinnaman, *et al* (2014) Abbreviations: %SC = percent sequence coverage, UP = unique peptides, PSM = peptide spectrum matches

| Accession | Acronym | NP_value    | %SC          | UP           | # PSM        | %SC          |
|-----------|---------|-------------|--------------|--------------|--------------|--------------|--------------|--------------|--------------|--------------|--------------|--------------|--------------|--------------|--------------|
|           |         |             | BY4741_TAP_1 | BY4741_TAP_1 | BY4741_TAP_1 | BY4741_TAP_2 |
| 14318538  | YFR016C | NP_116671.1 | 0            | 0            | 0            | 0            | 0            | 0            | 0            | 0            | 0            | 0            | 0            | 0            | 0            |
| 6321647   | SER2    | NP_011724.1 | 0            | 0            | 0            | 0            | 0            | 0            | 0            | 0            | 0            | 0            | 0            | 0            | 0            |
| 398365769 | SHG1    | NP_009817.3 | 0            | 0            | 0            | 0            | 0            | 0            | 0            | 0            | 0            | 0            | 0            | 0            | 0            |
| 6321009   | SPT2    | NP_011088.1 | 0            | 0            | 0            | 0            | 0            | 0            | 0            | 0            | 0            | 0            | 0            | 0            | 0            |
| 398365509 | RRP1    | NP_010372.3 | 11.51        | 3            | 6            | 0            | 0            | 0            | 0            | 0            | 0            | 0            | 0            | 0            | 10.43        |
| 6323756   | MYO5    | NP_013827.1 | 9.68         | 10           | 17           | 0            | 0            | 0            | 0.90         | 1            | 1            | 0.90         | 1            | 3            | 4.10         |
| 6324839   | RBL2    | NP_014908.1 | 11.32        | 1            | 3            | 0            | 0            | 0            | 0            | 0            | 0            | 0            | 0            | 0            | 0            |
| 6319685   | DUR1,2  | NP_009767.1 | 0            | 0            | 0            | 0            | 0            | 0            | 0.71         | 1            | 1            | 0            | 0            | 0            | 0            |
| 6325273   | TIF6    | NP_015341.1 | 14.69        | 3            | 5            | 0            | 0            | 0            | 0            | 0            | 0            | 0            | 0            | 0            | 11.43        |
| 6324938   | PRE10   | NP_015007.1 | 0            | 0            | 0            | 0            | 0            | 0            | 0            | 0            | 0            | 0            | 0            | 0            | 0            |
| 6324996   | APM1    | NP_015064.1 | 0            | 0            | 0            | 0            | 0            | 0            | 0            | 0            | 0            | 0            | 0            | 0            | 0            |
| 6324522   | GAL11   | NP_014591.1 | 1.20         | 1            | 1            | 0            | 0            | 0            | 0            | 0            | 0            | 0            | 0            | 0            | 0            |
| 6324113   | RAP1    | NP_014183.1 | 3.63         | 2            | 2            | 0            | 0            | 0            | 1.33         | 1            | 3            | 0            | 0            | 0            | 5.93         |
| 398366009 | YGR169C | NP_878080.3 | 0            | 0            | 0            | 0            | 0            | 0            | 0            | 0            | 0            | 0            | 0            | 0            | 0            |
| 6319564   | POL30   | NP_009645.1 | 0            | 0            | 0            | 0            | 0            | 0            | 0            | 0            | 0            | 0            | 0            | 0            | 0            |
| 6323546   | UTP14   | NP_013617.1 | 1.22         | 1            | 1            | 0            | 0            | 0            | 0            | 0            | 0            | 0.67         | 1            | 1            | 1.11         |
| 6324312   | PUB1    | NP_014382.1 | 1.99         | 1            | 13           | 0            | 0            | 0            | 0            | 0            | 0            | 0            | 0            | 0            | 3.75         |
| 6325286   | APL4    | NP_015354.1 | 0.96         | 1            | 1            | 0            | 0            | 0            | 0            | 0            | 0            | 0            | 0            | 0            | 0            |
| 6323401   | SSQ1    | NP_013473.1 | 6.70         | 3            | 5            | 0            | 0            | 0            | 0            | 0            | 0            | 0            | 0            | 0            | 0            |
| 6324048   | HCH1    | NP_014118.1 | 7.84         | 1            | 2            | 0            | 0            | 0            | 0            | 0            | 0            | 0            | 0            | 0            | 7.84         |
| 6319627   | APD1    | NP_009709.1 | 3.80         | 1            | 1            | 0            | 0            | 0            | 0            | 0            | 0            | 0            | 0            | 0            | 7.28         |
| 6320102   | DUN1    | NP_010182.1 | 2.92         | 1            | 1            | 0            | 0            | 0            | 0            | 0            | 0            | 0            | 0            | 0            | 1.75         |
| 10383806  | SOL2    | NP_009999.2 | 4.44         | 1            | 1            | 0            | 0            | 0            | 0            | 0            | 0            | 0            | 0            | 0            | 0            |
| 6320205   | YRB1    | NP_010285.1 | 5.47         | 1            | 8            | 5.47         | 1            | 4            | 0            | 0            | 0            | 0            | 0            | 0            | 0            |
| 398366613 | TOM1    | NP_010745.3 | 0.86         | 3            | 3            | 0            | 0            | 0            | 0.76         | 2            | 5            | 0            | 0            | 0            | 1.32         |
| 398365693 | TMA64   | NP_010402.3 | 1.77         | 1            | 1            | 0            | 0            | 0            | 0            | 0            | 0            | 0            | 0            | 0            | 1.77         |
| 6323893   | BCH1    | NP_013964.1 | 1.24         | 1            | 1            | 0            | 0            | 0            | 0            | 0            | 0            | 0            | 0            | 0            | 1.24         |
| 398366023 | YTM1    | NP_014915.3 | 3.91         | 2            | 3            | 0            | 0            | 0            | 3.70         | 1            | 1            | 0            | 0            | 0            | 4.35         |
| 6319437   | STU1    | NP_009519.1 | 0            | 0            | 0            | 0            | 0            | 0            | 0            | 0            | 0            | 0            | 0            | 0            | 0.66         |
| 398364833 | MET4    | NP_014296.4 | 0            | 0            | 0            | 0            | 0            | 0            | 0            | 0            | 0            | 0            | 0            | 0            | 2.08         |
| 6321424   | PUF4    | NP_011501.1 | 0            | 0            | 0            | 0            | 0            | 0            | 0            | 0            | 0            | 0            | 0            | 0            | 0            |
| 6322411   | MTR4    | NP_012485.1 | 1.21         | 1            | 1            | 0            | 0            | 0            | 0            | 0            | 0            | 0            | 0            | 0            | 10.16        |
| 14318501  | LPD1    | NP_116635.1 | 12.63        | 6            | 9            | 0            | 0            | 0            | 0            | 0            | 0            | 0            | 0            | 0            | 17.03        |
| 6321890   | SFB3    | NP_011966.1 | 8.29         | 7            | 14           | 0            | 0            | 0            | 0            | 0            | 0            | 0            | 0            | 0            | 0.86         |
| 398366661 | GIN4    | NP_010795.3 | 0.70         | 1            | 2            | 0            | 0            | 0            | 0            | 0            | 0            | 0            | 0            | 0            | 1.31         |
| 398365725 | SOL1    | NP_014432.3 | 4.36         | 1            | 1            | 0            | 0            | 0            | 0            | 0            | 0            | 0            | 0            | 0            | 0            |
| 6323570   | DAK1    | NP_013641.1 | 14.73        | 7            | 13           | 1.71         | 1            | 1            | 2.23         | 1            | 1            | 0            | 0            | 0            | 16.10        |





Table S1 - Smith-Kinnaman, *et al* (2014) Abbreviations: %SC = percent sequence coverage, UP = unique peptides, PSM = peptide spectrum matches

| Accession | Acronym | NP_value    | %SC          | UP           | # PSM        | %SC          |
|-----------|---------|-------------|--------------|--------------|--------------|--------------|--------------|--------------|--------------|--------------|--------------|--------------|--------------|--------------|--------------|
|           |         |             | BY4741_TAP_1 | BY4741_TAP_1 | BY4741_TAP_1 | BY4741_TAP_2 |
| 6322260   | ECM25   | NP_012334.1 | 0            | 0            | 0            | 0            | 0            | 0            | 0            | 0            | 0            | 0            | 0            | 0            | 1.84         |
| 6319691   | SDS24   | NP_009773.1 | 1.90         | 1            | 1            | 0            | 0            | 0            | 0            | 0            | 0            | 0            | 0            | 0            | 0            |
| 6322202   | SQT1    | NP_012277.1 | 5.80         | 2            | 3            | 0            | 0            | 0            | 0            | 0            | 0            | 3.48         | 1            | 2            | 15.08        |
| 6321961   | THP2    | NP_012037.1 | 0            | 0            | 0            | 0            | 0            | 0            | 4.21         | 1            | 1            | 0            | 0            | 0            | 8.05         |
| 398364887 | CKB1    | NP_011496.3 | 3.60         | 1            | 5            | 0            | 0            | 0            | 0            | 0            | 0            | 0            | 0            | 0            | 3.60         |
| 6320131   | YET3    | NP_010211.1 | 13.30        | 3            | 10           | 0            | 0            | 0            | 0            | 0            | 0            | 0            | 0            | 0            | 0            |
| 398364267 | URA3    | NP_010893.3 | 0            | 0            | 0            | 0            | 0            | 0            | 0            | 0            | 0            | 0            | 0            | 0            | 0            |
| 398366549 | NKP1    | NP_010671.4 | 6.72         | 1            | 2            | 0            | 0            | 0            | 0            | 0            | 0            | 0            | 0            | 0            | 3.36         |
| 398366429 | ATF1    | NP_015022.3 | 3.24         | 1            | 1            | 0            | 0            | 0            | 0            | 0            | 0            | 3.81         | 1            | 1            | 4.95         |
| 398365899 | ABP140  | NP_014882.4 | 3.66         | 2            | 2            | 0            | 0            | 0            | 0            | 0            | 0            | 0            | 0            | 0            | 3.18         |
| 6324659   | OST3    | NP_014728.1 | 3.43         | 1            | 5            | 0            | 0            | 0            | 0            | 0            | 0            | 0            | 0            | 0            | 0            |
| 398365193 | TRS33   | NP_014758.3 | 5.22         | 1            | 1            | 0            | 0            | 0            | 0            | 0            | 0            | 0            | 0            | 0            | 5.22         |
| 6322746   | APE1    | NP_012819.1 | 0            | 0            | 0            | 0            | 0            | 0            | 0            | 0            | 0            | 0            | 0            | 0            | 5.06         |
| 398365017 | YGR001C | NP_011515.4 | 7.26         | 2            | 2            | 0            | 0            | 0            | 0            | 0            | 0            | 0            | 0            | 0            | 6.05         |
| 6319455   | FUS3    | NP_009537.1 | 7.08         | 3            | 3            | 0            | 0            | 0            | 0            | 0            | 0            | 0            | 0            | 0            | 3.40         |
| 6321351   | MMS2    | NP_011428.1 | 0            | 0            | 0            | 0            | 0            | 0            | 0            | 0            | 0            | 0            | 0            | 0            | 21.90        |
| 6319435   | YBL036C | NP_009517.1 | 0            | 0            | 0            | 0            | 0            | 0            | 0            | 0            | 0            | 0            | 0            | 0            | 10.51        |
| 6321450   | SNU71   | NP_011527.1 | 0            | 0            | 0            | 0            | 0            | 0            | 0            | 0            | 0            | 0            | 0            | 0            | 3.06         |
| 6325394   | RRP9    | NP_015463.1 | 3.84         | 2            | 2            | 0            | 0            | 0            | 0            | 0            | 0            | 0            | 0            | 0            | 1.57         |
| 269970294 | GCV3    | NP_009355.3 | 0            | 0            | 0            | 0            | 0            | 0            | 0            | 0            | 0            | 0            | 0            | 0            | 4.71         |
| 6323352   | MMS22   | NP_013424.1 | 0            | 0            | 0            | 0            | 0            | 0            | 0            | 0            | 0            | 0            | 0            | 0            | 0.55         |
| 330443445 | PBY1    | NP_009652.2 | 0            | 0            | 0            | 0            | 0            | 0            | 0            | 0            | 0            | 0            | 0            | 0            | 1.46         |
| 398364685 | NAM9    | NP_014262.3 | 2.26         | 1            | 1            | 0            | 0            | 0            | 0            | 0            | 0            | 0            | 0            | 0            | 2.06         |
| 6319999   | YML11   | NP_010079.1 | 4.02         | 1            | 1            | 0            | 0            | 0            | 0            | 0            | 0            | 0            | 0            | 0            | 4.02         |
| 6325336   | MRL1    | NP_015404.1 | 3.41         | 1            | 1            | 0            | 0            | 0            | 0            | 0            | 0            | 0            | 0            | 0            | 2.62         |
| 398365551 | SGM1    | NP_012668.3 | 1.84         | 1            | 1            | 0            | 0            | 0            | 0            | 0            | 0            | 0            | 0            | 0            | 2.12         |
| 6322985   | FPS1    | NP_013057.1 | 2.24         | 1            | 3            | 0            | 0            | 0            | 0            | 0            | 0            | 0            | 0            | 0            | 0            |
| 398365713 | MRM1    | NP_014844.3 | 0            | 0            | 0            | 0            | 0            | 0            | 0            | 0            | 0            | 0            | 0            | 0            | 0            |
| 6323001   | ISA1    | NP_013073.1 | 0            | 0            | 0            | 0            | 0            | 0            | 0            | 0            | 0            | 0            | 0            | 0            | 0            |
| 6323955   | PRC1    | NP_014026.1 | 0            | 0            | 0            | 0            | 0            | 0            | 0            | 0            | 0            | 0            | 0            | 0            | 1.88         |
| 6322095   | YIL096C | NP_012170.1 | 0            | 0            | 0            | 0            | 0            | 0            | 0            | 0            | 0            | 0            | 0            | 0            | 1.79         |
| 6325139   | MRP51   | NP_015207.1 | 0            | 0            | 0            | 0            | 0            | 0            | 0            | 0            | 0            | 0            | 0            | 0            | 3.49         |
| 6323808   | MRPS8   | NP_013879.1 | 0            | 0            | 0            | 0            | 0            | 0            | 0            | 0            | 0            | 0            | 0            | 0            | 6.45         |
| 6322682   | TPK3    | NP_012755.1 | 0            | 0            | 0            | 0            | 0            | 0            | 0            | 0            | 0            | 0            | 0            | 0            | 2.51         |
| 6324978   | YPL277C | NP_015046.1 | 0            | 0            | 0            | 0            | 0            | 0            | 0            | 0            | 0            | 2.05         | 1            | 2            | 0            |
| 6325296   | ERV2    | NP_015362.1 | 6.63         | 1            | 1            | 0            | 0            | 0            | 0            | 0            | 0            | 6.63         | 1            | 1            | 0            |
| 6323252   | IFH1    | NP_013324.1 | 0            | 0            | 0            | 1.11         | 1            | 1            | 0            | 0            | 0            | 0            | 0            | 0            | 0            |









Table S1 - Smith-Kinnaman, *et al* (2014) Abbreviations: %SC = percent sequence coverage, UP = unique peptides, PSM = peptide spectrum matches

| Accession | Acronym | NP_value    | %SC          | UP           | # PSM        | %SC          |
|-----------|---------|-------------|--------------|--------------|--------------|--------------|--------------|--------------|--------------|--------------|--------------|--------------|--------------|--------------|--------------|
|           |         |             | BY4741_TAP_1 | BY4741_TAP_1 | BY4741_TAP_1 | BY4741_TAP_2 |
| 6324988   | ACM1    | NP_015056.1 | 0            | 0            | 0            | 0            | 0            | 0            | 0            | 0            | 0            | 0            | 0            | 0            | 0            |
| 330443417 | RRN6    | NP_009539.2 | 0            | 0            | 0            | 0            | 0            | 0            | 0            | 0            | 0            | 0            | 0            | 0            | 0            |
| 6325398   | TAZ1    | NP_015466.1 | 0            | 0            | 0            | 0            | 0            | 0            | 0            | 0            | 0            | 0            | 0            | 0            | 0            |
| 6321828   | MSC7    | NP_011904.1 | 4.66         | 3            | 4            | 0            | 0            | 0            | 0            | 0            | 0            | 0            | 0            | 0            | 0            |
| 6323320   | GUF1    | NP_013392.1 | 0            | 0            | 0            | 0            | 0            | 0            | 0            | 0            | 0            | 0            | 0            | 0            | 0            |
| 16740526  | GYP8    | NP_444296.1 | 0            | 0            | 0            | 0            | 0            | 0            | 0            | 0            | 0            | 0            | 0            | 0            | 0            |
| 6324783   | NPT1    | NP_014852.1 | 5.13         | 2            | 2            | 0            | 0            | 0            | 0            | 0            | 0            | 0            | 0            | 0            | 0            |
| 6319974   | HOP     | NP_010054.1 | 0            | 0            | 0            | 0            | 0            | 0            | 0            | 0            | 0            | 0            | 0            | 0            | 0            |
| 6319931   | ABP1    | NP_010012.1 | 24.66        | 13           | 34           | 0            | 0            | 0            | 2.20         | 1            | 1            | 0            | 0            | 0            | 14.02        |
| 6321787   | OSH7    | NP_011863.1 | 11.21        | 6            | 11           | 0            | 0            | 0            | 2.97         | 1            | 1            | 3.66         | 2            | 9            | 16.02        |
| 6319512   | CHS2    | NP_009594.1 | 0.83         | 1            | 1            | 0            | 0            | 0            | 0            | 0            | 0            | 0            | 0            | 0            | 2.18         |
| 6324912   | KRE5    | NP_014981.1 | 0            | 0            | 0            | 0            | 0            | 0            | 0            | 0            | 0            | 0            | 0            | 0            | 1.32         |
| 398365337 | SFL1    | NP_014783.4 | 0            | 0            | 0            | 0            | 0            | 0            | 0            | 0            | 0            | 0            | 0            | 0            | 0            |
| 398364433 | CAJ1    | NP_010967.3 | 14.32        | 4            | 6            | 3.58         | 1            | 4            | 0            | 0            | 0            | 0            | 0            | 0            | 23.02        |
| 6322547   | EMC2    | NP_012621.1 | 3.77         | 1            | 1            | 0            | 0            | 0            | 0            | 0            | 0            | 0            | 0            | 0            | 0            |
| 6324225   | LEU4    | NP_014295.1 | 3.07         | 2            | 2            | 0            | 0            | 0            | 0            | 0            | 0            | 0            | 0            | 0            | 2.42         |
| 6322537   | MIR1    | NP_012611.1 | 14.47        | 4            | 7            | 0            | 0            | 0            | 0            | 0            | 0            | 0            | 0            | 0            | 9.65         |
| 6321795   | ERG11   | NP_011871.1 | 18.87        | 7            | 12           | 0            | 0            | 0            | 0            | 0            | 0            | 0            | 0            | 0            | 10.38        |
| 6323953   | YMR295C | NP_014024.1 | 0            | 0            | 0            | 0            | 0            | 0            | 0            | 0            | 0            | 0            | 0            | 0            | 0            |
| 398366013 | YDR186C | NP_010472.3 | 0            | 0            | 0            | 0            | 0            | 0            | 0            | 0            | 0            | 0            | 0            | 0            | 0            |
| 6323943   | DSS1    | NP_014014.1 | 0            | 0            | 0            | 0            | 0            | 0            | 0            | 0            | 0            | 0            | 0            | 0            | 1.14         |
| 6320851   | HEM14   | NP_010930.1 | 2.23         | 1            | 2            | 0            | 0            | 0            | 0            | 0            | 0            | 0            | 0            | 0            | 0            |
| 6322116   | SER33   | NP_012191.1 | 16.63        | 6            | 15           | 0            | 0            | 0            | 2.13         | 1            | 1            | 2.35         | 1            | 1            | 17.70        |
| 83578105  | TMA46   | NP_014734.2 | 2.90         | 1            | 1            | 0            | 0            | 0            | 0            | 0            | 0            | 0            | 0            | 0            | 0            |
| 6321960   | CDC23   | NP_012036.1 | 0            | 0            | 0            | 0            | 0            | 0            | 0            | 0            | 0            | 0            | 0            | 0            | 2.24         |
| 6320470   | AKR1    | NP_010550.1 | 0            | 0            | 0            | 0            | 0            | 0            | 0            | 0            | 0            | 0            | 0            | 0            | 1.57         |
| 398365797 | YNR048W | NP_014446.3 | 0            | 0            | 0            | 0            | 0            | 0            | 0            | 0            | 0            | 0            | 0            | 0            | 3.05         |
| 6322387   | SMC3    | NP_012461.1 | 0            | 0            | 0            | 1.22         | 1            | 1            | 0            | 0            | 0            | 0            | 0            | 0            | 0            |
| 6321806   | ARG4    | NP_011882.1 | 1.94         | 1            | 1            | 0            | 0            | 0            | 0            | 0            | 0            | 0            | 0            | 0            | 0            |
| 6324055   | GOR1    | NP_014125.1 | 0            | 0            | 0            | 0            | 0            | 0            | 0            | 0            | 0            | 0            | 0            | 0            | 0            |
| 6324554   | YOL019W | NP_014623.1 | 0            | 0            | 0            | 0            | 0            | 0            | 0            | 0            | 0            | 0            | 0            | 0            | 0            |
| 6324897   | PMT3    | NP_014966.1 | 0            | 0            | 0            | 0            | 0            | 0            | 0            | 0            | 0            | 0            | 0            | 0            | 0            |
| 6323553   | ALO1    | NP_013624.1 | 19.58        | 8            | 22           | 0            | 0            | 0            | 0            | 0            | 0            | 0            | 0            | 0            | 15.78        |
| 6323958   | ADE4    | NP_014029.1 | 7.45         | 3            | 12           | 0            | 0            | 0            | 0            | 0            | 0            | 0            | 0            | 0            | 4.12         |
| 6322585   | ENT3    | NP_012659.1 | 7.84         | 3            | 48           | 0            | 0            | 0            | 2.70         | 1            | 1            | 0            | 0            | 0            | 26.47        |
| 6322732   | SBA1    | NP_012805.1 | 16.20        | 3            | 6            | 4.17         | 1            | 1            | 0            | 0            | 0            | 0            | 0            | 0            | 0            |
| 6319767   | BSD2    | NP_009849.1 | 0            | 0            | 0            | 0            | 0            | 0            | 4.05         | 1            | 1            | 0            | 0            | 0            | 4.05         |











Table S1 - Smith-Kinnaman, *et al* (2014) Abbreviations: %SC = percent sequence coverage, UP = unique peptides, PSM = peptide spectrum matches

| Accession | Acronym | NP_value    | %SC          | UP           | # PSM        | %SC          |
|-----------|---------|-------------|--------------|--------------|--------------|--------------|--------------|--------------|--------------|--------------|--------------|--------------|--------------|--------------|--------------|
|           |         |             | BY4741_TAP_1 | BY4741_TAP_1 | BY4741_TAP_1 | BY4741_TAP_2 |
| 6323630   | ERV25   | NP_013701.1 | 6.16         | 1            | 2            | 0            | 0            | 0            | 0            | 0            | 0            | 0            | 0            | 0            | 0            |
| 6323716   | TVP18   | NP_013787.1 | 0            | 0            | 0            | 0            | 0            | 0            | 0            | 0            | 0            | 0            | 0            | 0            | 0            |
| 6319289   | SNC1    | NP_009372.1 | 11.11        | 1            | 3            | 0            | 0            | 0            | 0            | 0            | 0            | 0            | 0            | 0            | 0            |
| 398364281 | EMP24   | NP_011315.3 | 12.81        | 3            | 10           | 0            | 0            | 0            | 4.43         | 1            | 2            | 0            | 0            | 0            | 6.90         |
| 6320298   | DNF2    | NP_010378.1 | 2.23         | 3            | 3            | 0            | 0            | 0            | 0            | 0            | 0            | 0            | 0            | 0            | 2.30         |
| 330443597 | MNN5    | NP_012349.2 | 7.85         | 4            | 7            | 0            | 0            | 0            | 2.39         | 1            | 1            | 0            | 0            | 0            | 6.48         |
| 6320897   | FCY2    | NP_010976.1 | 2.44         | 2            | 2            | 0            | 0            | 0            | 0            | 0            | 0            | 0            | 0            | 0            | 1.69         |
| 330443542 | SAP155  | NP_116698.3 | 0            | 0            | 0            | 0            | 0            | 0            | 0            | 0            | 0            | 0            | 0            | 0            | 2.99         |
| 14318521  | SPB4    | NP_116654.1 | 0            | 0            | 0            | 0            | 0            | 0            | 0            | 0            | 0            | 0            | 0            | 0            | 0            |
| 6323367   | NUP2    | NP_013439.1 | 13.19        | 7            | 9            | 0            | 0            | 0            | 0            | 0            | 0            | 0            | 0            | 0            | 0            |
| 6319303   | TPD3    | NP_009386.1 | 9.29         | 4            | 4            | 0            | 0            | 0            | 0            | 0            | 0            | 0            | 0            | 0            | 4.57         |
| 6324166   | RIA1    | NP_014236.1 | 0.72         | 1            | 1            | 0            | 0            | 0            | 0            | 0            | 0            | 0            | 0            | 0            | 0.99         |
| 398364557 | AIM21   | NP_012268.3 | 0            | 0            | 0            | 0            | 0            | 0            | 1.18         | 1            | 1            | 0            | 0            | 0            | 0            |
| 6322369   | SRS2    | NP_012443.1 | 0.68         | 1            | 1            | 0            | 0            | 0            | 0            | 0            | 0            | 0            | 0            | 0            | 0.68         |
| 6324088   | ZWF1    | NP_014158.1 | 0            | 0            | 0            | 0            | 0            | 0            | 0            | 0            | 0            | 0            | 0            | 0            | 3.37         |
| 6319890   | TAF2    | NP_009971.1 | 0            | 0            | 0            | 0            | 0            | 0            | 0            | 0            | 0            | 0            | 0            | 0            | 0.57         |
| 6320033   | SFA1    | NP_010113.1 | 0            | 0            | 0            | 0            | 0            | 0            | 0            | 0            | 0            | 0            | 0            | 0            | 0            |
| 6325429   | BSP1    | NP_015497.1 | 0            | 0            | 0            | 0            | 0            | 0            | 0            | 0            | 0            | 0            | 0            | 0            | 0            |
| 6323022   | YLL007C | NP_013094.1 | 0            | 0            | 0            | 0            | 0            | 0            | 0            | 0            | 0            | 0            | 0            | 0            | 0            |
| 6324918   | YOR342C | NP_014987.1 | 0            | 0            | 0            | 0            | 0            | 0            | 0            | 0            | 0            | 0            | 0            | 0            | 0            |
| 6320091   | TRM3    | NP_010171.1 | 0.63         | 1            | 1            | 0            | 0            | 0            | 0            | 0            | 0            | 0            | 0            | 0            | 0.63         |
| 6322925   | SIS2    | NP_012998.1 | 0            | 0            | 0            | 0            | 0            | 0            | 0            | 0            | 0            | 0            | 0            | 0            | 0            |
| 6321999   | SCH9    | NP_012075.1 | 1.21         | 1            | 1            | 0            | 0            | 0            | 1.82         | 1            | 4            | 1.82         | 1            | 2            | 0            |
| 6320106   | RPN6    | NP_010186.1 | 2.07         | 1            | 1            | 0            | 0            | 0            | 0            | 0            | 0            | 0            | 0            | 0            | 25.58        |
| 6320934   | PTC2    | NP_011013.1 | 18.32        | 8            | 31           | 0            | 0            | 0            | 0            | 0            | 0            | 0            | 0            | 0            | 10.13        |
| 6322545   | STE18   | NP_012619.1 | 15.45        | 1            | 1            | 0            | 0            | 0            | 0            | 0            | 0            | 0            | 0            | 0            | 15.45        |
| 27808714  | LAP3    | NP_014160.2 | 0            | 0            | 0            | 0            | 0            | 0            | 0            | 0            | 0            | 0            | 0            | 0            | 3.08         |
| 6322410   | IRC8    | NP_012484.1 | 0            | 0            | 0            | 0            | 0            | 0            | 0            | 0            | 0            | 0            | 0            | 0            | 0            |
| 14318532  | UBP6    | NP_116665.1 | 13.23        | 5            | 7            | 0            | 0            | 0            | 5.41         | 2            | 3            | 0            | 0            | 0            | 17.03        |
| 6320129   | BRE1    | NP_010209.1 | 1.29         | 1            | 2            | 0            | 0            | 0            | 0            | 0            | 0            | 0            | 0            | 0            | 0            |
| 6324287   | COG6    | NP_014357.1 | 1.67         | 1            | 1            | 0            | 0            | 0            | 0            | 0            | 0            | 0            | 0            | 0            | 0            |
| 6320846   | NTF2    | NP_010925.1 | 6.40         | 1            | 2            | 0            | 0            | 0            | 0            | 0            | 0            | 0            | 0            | 0            | 12.80        |
| 6324508   | MET22   | NP_014577.1 | 0            | 0            | 0            | 0            | 0            | 0            | 0            | 0            | 0            | 0            | 0            | 0            | 0            |
| 6319975   | GCS1    | NP_010055.1 | 44.32        | 13           | 69           | 0            | 0            | 0            | 0            | 0            | 0            | 0            | 0            | 0            | 53.69        |
| 63535562  | CHA1    | NP_00101803 | 4.44         | 2            | 2            | 0            | 0            | 0            | 0            | 0            | 0            | 0            | 0            | 0            | 6.67         |
| 6322141   | NEO1    | NP_012216.1 | 2.00         | 2            | 2            | 0            | 0            | 0            | 0            | 0            | 0            | 0            | 0            | 0            | 1.56         |
| 398365175 | CDC28   | NP_009718.3 | 13.42        | 4            | 5            | 0            | 0            | 0            | 4.70         | 1            | 1            | 9.06         | 1            | 2            | 11.07        |





























Table S1 - Smith-Kinnaman, *et al* (2014) Abbreviations: %SC = percent sequence coverage, UP = unique peptides, PSM = peptide spectrum matches

| Accession | Acronym | NP_value    | %SC          | UP           | # PSM        | %SC          |
|-----------|---------|-------------|--------------|--------------|--------------|--------------|--------------|--------------|--------------|--------------|--------------|--------------|--------------|--------------|--------------|
|           |         |             | BY4741_TAP_1 | BY4741_TAP_1 | BY4741_TAP_1 | BY4741_TAP_2 |
| 6324946   | MRS6    | NP_015015.1 | 6.47         | 3            | 4            | 0            | 0            | 0            | 0            | 0            | 0            | 0            | 0            | 0            | 2.32         |
| 6325052   | HRR25   | NP_015120.1 | 3.85         | 1            | 2            | 0            | 0            | 0            | 0            | 0            | 0            | 0            | 0            | 0            | 1.82         |
| 6324631   | SGT1    | NP_014700.1 | 2.53         | 1            | 1            | 0            | 0            | 0            | 0            | 0            | 0            | 0            | 0            | 0            | 2.78         |
| 6323651   | ADI1    | NP_013722.1 | 0            | 0            | 0            | 0            | 0            | 0            | 0            | 0            | 0            | 0            | 0            | 0            | 7.26         |
| 398365629 | DBF2    | NP_011606.3 | 3.50         | 2            | 2            | 0            | 0            | 0            | 0            | 0            | 0            | 0            | 0            | 0            | 0            |
| 6320725   | GRH1    | NP_010805.1 | 4.03         | 1            | 1            | 0            | 0            | 0            | 0            | 0            | 0            | 0            | 0            | 0            | 0            |
| 6324056   | TOF1    | NP_014126.1 | 0            | 0            | 0            | 0            | 0            | 0            | 0            | 0            | 0            | 0            | 0            | 0            | 1.05         |
| 6321823   | PIH1    | NP_011899.1 | 0            | 0            | 0            | 0            | 0            | 0            | 0            | 0            | 0            | 0            | 0            | 0            | 0            |
| 10383767  | KCC4    | NP_009907.2 | 1.64         | 1            | 1            | 0            | 0            | 0            | 0            | 0            | 0            | 0            | 0            | 0            | 0            |
| 6319556   | UBC4    | NP_009638.1 | 0            | 0            | 0            | 0            | 0            | 0            | 0            | 0            | 0            | 0            | 0            | 0            | 0            |
| 6325007   | GYP5    | NP_015075.1 | 0            | 0            | 0            | 0            | 0            | 0            | 0            | 0            | 0            | 0            | 0            | 0            | 0            |
| 6322121   | SEC6    | NP_012196.1 | 0            | 0            | 0            | 0            | 0            | 0            | 0            | 0            | 0            | 0            | 0            | 0            | 0            |
| 6323292   | TMA7    | NP_013364.1 | 0            | 0            | 0            | 0            | 0            | 0            | 0            | 0            | 0            | 0            | 0            | 0            | 0            |
| 6325227   | TRM44   | NP_015295.1 | 2.29         | 1            | 1            | 0            | 0            | 0            | 0            | 0            | 0            | 0            | 0            | 0            | 8.11         |
| 6322526   | TOR1    | NP_012600.1 | 0            | 0            | 0            | 0            | 0            | 0            | 0            | 0            | 0            | 0            | 0            | 0            | 0            |
| 6324085   | SUI1    | NP_014155.1 | 40.74        | 4            | 15           | 0            | 0            | 0            | 0            | 0            | 0            | 0            | 0            | 0            | 70.37        |
| 398366199 | IVY1    | NP_010515.3 | 2.43         | 1            | 2            | 0            | 0            | 0            | 0            | 0            | 0            | 0            | 0            | 0            | 6.62         |
| 6322839   | ARC19   | NP_012912.1 | 9.36         | 1            | 1            | 0            | 0            | 0            | 0            | 0            | 0            | 0            | 0            | 0            | 14.04        |
| 6321914   | CIA2    | NP_011990.1 | 0            | 0            | 0            | 0            | 0            | 0            | 0            | 0            | 0            | 0            | 0            | 0            | 5.19         |
| 6319737   | RGD1    | NP_009819.1 | 1.50         | 1            | 1            | 0            | 0            | 0            | 0            | 0            | 0            | 0            | 0            | 0            | 0            |
| 6322419   | MHP1    | NP_012493.1 | 0            | 0            | 0            | 0            | 0            | 0            | 0            | 0            | 0            | 0            | 0            | 0            | 0.50         |
| 398366245 | LDB19   | NP_014967.3 | 0            | 0            | 0            | 0            | 0            | 0            | 0            | 0            | 0            | 0            | 0            | 0            | 0            |
| 6325011   | YPL245W | NP_015079.1 | 0            | 0            | 0            | 0            | 0            | 0            | 0            | 0            | 0            | 0            | 0            | 0            | 0            |
| 398364697 | LSM4    | NP_011037.3 | 4.81         | 1            | 1            | 5.88         | 1            | 5            | 0            | 0            | 0            | 0            | 0            | 0            | 10.70        |
| 6320840   | FMP52   | NP_010919.1 | 0            | 0            | 0            | 0            | 0            | 0            | 0            | 0            | 0            | 0            | 0            | 0            | 18.61        |
| 6324794   | RCN2    | NP_014863.1 | 4.91         | 1            | 1            | 0            | 0            | 0            | 0            | 0            | 0            | 0            | 0            | 0            | 4.53         |
| 6321800   | VPS29   | NP_011876.1 | 4.26         | 1            | 1            | 0            | 0            | 0            | 0            | 0            | 0            | 0            | 0            | 0            | 8.16         |
| 398364967 | SOK1    | NP_010289.3 | 0            | 0            | 0            | 0            | 0            | 0            | 0            | 0            | 0            | 0            | 0            | 0            | 0            |
| 6320413   | UME6    | NP_010493.1 | 0            | 0            | 0            | 0            | 0            | 0            | 0            | 0            | 0            | 0            | 0            | 0            | 0            |
| 6322379   | IML2    | NP_012453.1 | 0            | 0            | 0            | 0            | 0            | 0            | 0            | 0            | 0            | 0            | 0            | 0            | 1.23         |
| 6325362   | COG4    | NP_015430.1 | 0            | 0            | 0            | 0            | 0            | 0            | 0            | 0            | 0            | 0            | 0            | 0            | 0            |
| 6322156   | BCY1    | NP_012231.1 | 8.65         | 4            | 8            | 0            | 0            | 0            | 0            | 0            | 0            | 0            | 0            | 0            | 11.06        |
| 6322424   | SNX4    | NP_012498.1 | 2.13         | 1            | 1            | 0            | 0            | 0            | 0            | 0            | 0            | 0            | 0            | 0            | 3.78         |
| 398365471 | MCM7    | NP_009761.4 | 1.07         | 1            | 3            | 0            | 0            | 0            | 0            | 0            | 0            | 0            | 0            | 0            | 1.54         |
| 398365269 | SMY2    | NP_009731.4 | 2.43         | 1            | 1            | 0            | 0            | 0            | 0            | 0            | 0            | 0            | 0            | 0            | 0            |
| 6323616   | YML6    | NP_013687.1 | 0            | 0            | 0            | 0            | 0            | 0            | 0            | 0            | 0            | 0            | 0            | 0            | 2.45         |
| 6325343   | SUA7    | NP_015411.1 | 0            | 0            | 0            | 6.96         | 1            | 1            | 3.77         | 1            | 1            | 0            | 0            | 0            | 8.70         |































Table S1 - Smith-Kinnaman, *et al* (2014) Abbreviations: %SC = percent sequence coverage, UP = unique peptides, PSM = peptide spectrum matches

| Accession | Acronym | NP_value    | %SC          | UP           | # PSM        | %SC          |
|-----------|---------|-------------|--------------|--------------|--------------|--------------|--------------|--------------|--------------|--------------|--------------|--------------|--------------|--------------|--------------|
|           |         |             | BY4741_TAP_1 | BY4741_TAP_1 | BY4741_TAP_1 | BY4741_TAP_2 |
| 6324068   | ORC5    | NP_014138.1 | 0            | 0            | 0            | 0            | 0            | 0            | 0            | 0            | 0            | 0            | 0            | 0            | 0            |
| 6325213   | NOP4    | NP_015282.1 | 0            | 0            | 0            | 0            | 0            | 0            | 0            | 0            | 0            | 0            | 0            | 0            | 2.48         |
| 6324041   | CAF40   | NP_014111.1 | 0            | 0            | 0            | 0            | 0            | 0            | 0            | 0            | 0            | 0            | 0            | 0            | 0            |
| 6320086   | CYK3    | NP_010166.1 | 0            | 0            | 0            | 0            | 0            | 0            | 0            | 0            | 0            | 0            | 0            | 0            | 0            |
| 6321762   | SNF6    | NP_011838.1 | 0            | 0            | 0            | 0            | 0            | 0            | 0            | 0            | 0            | 0            | 0            | 0            | 0            |
| 398365087 | GRX4    | NP_011101.3 | 0            | 0            | 0            | 0            | 0            | 0            | 0            | 0            | 0            | 0            | 0            | 0            | 0            |
| 6323218   | ATG26   | NP_013290.1 | 0            | 0            | 0            | 0            | 0            | 0            | 0            | 0            | 0            | 0            | 0            | 0            | 0            |
| 41629693  | PRP18   | NP_011520.2 | 0            | 0            | 0            | 0            | 0            | 0            | 0            | 0            | 0            | 0            | 0            | 0            | 0            |
| 330443528 | PTP3    | NP_010998.2 | 0            | 0            | 0            | 0            | 0            | 0            | 0            | 0            | 0            | 0            | 0            | 0            | 0            |
| 398364733 | YIR035C | NP_012301.3 | 3.54         | 1            | 1            | 0            | 0            | 0            | 0            | 0            | 0            | 0            | 0            | 0            | 3.54         |
| 6321766   | AIM17   | NP_011842.1 | 0            | 0            | 0            | 0            | 0            | 0            | 0            | 0            | 0            | 0            | 0            | 0            | 0            |
| 14318483  | MOB2    | NP_116618.1 | 0            | 0            | 0            | 0            | 0            | 0            | 0            | 0            | 0            | 0            | 0            | 0            | 0            |
| 6324527   | PSK2    | NP_014597.1 | 0            | 0            | 0            | 0            | 0            | 0            | 0            | 0            | 0            | 0            | 0            | 0            | 0            |
| 398365421 | PRP16   | NP_013012.3 | 0            | 0            | 0            | 0            | 0            | 0            | 0            | 0            | 0            | 0            | 0            | 0            | 0            |
| 41629685  | RSC30   | NP_011923.2 | 1.70         | 1            | 1            | 0            | 0            | 0            | 0            | 0            | 0            | 0            | 0            | 0            | 0            |
| 6320907   | VHR2    | NP_010986.1 | 0            | 0            | 0            | 0            | 0            | 0            | 0            | 0            | 0            | 0            | 0            | 0            | 2.97         |
| 398366405 | GCN2    | NP_010569.3 | 0            | 0            | 0            | 0            | 0            | 0            | 0            | 0            | 0            | 0            | 0            | 0            | 0            |
| 398364549 | GYP6    | NP_012491.3 | 0            | 0            | 0            | 0            | 0            | 0            | 0            | 0            | 0            | 0            | 0            | 0            | 0            |
| 330443696 | YNL193W | NP_014206.2 | 0            | 0            | 0            | 0            | 0            | 0            | 0            | 0            | 0            | 0            | 0            | 0            | 0            |
| 6325243   | YPL014W | NP_015311.1 | 0            | 0            | 0            | 0            | 0            | 0            | 0            | 0            | 0            | 0            | 0            | 0            | 0            |
| 6325327   | MED1    | NP_015395.1 | 0            | 0            | 0            | 0            | 0            | 0            | 0            | 0            | 0            | 0            | 0            | 0            | 0            |
| 6320160   | MTF2    | NP_010240.1 | 0            | 0            | 0            | 0            | 0            | 0            | 0            | 0            | 0            | 0            | 0            | 0            | 0            |
| 6319287   | PRP45   | NP_009370.1 | 0            | 0            | 0            | 0            | 0            | 0            | 0            | 0            | 0            | 0            | 0            | 0            | 0            |
| 398365919 | SEC5    | NP_010450.3 | 0            | 0            | 0            | 0            | 0            | 0            | 0            | 0            | 0            | 0            | 0            | 0            | 0            |
| 6320433   | SIR4    | NP_010513.1 | 0            | 0            | 0            | 0            | 0            | 0            | 0            | 0            | 0            | 0            | 0            | 0            | 0            |
| 6321725   | BIO2    | NP_011802.1 | 0            | 0            | 0            | 0            | 0            | 0            | 0            | 0            | 0            | 0            | 0            | 0            | 0            |
| 6324177   | INN1    | NP_014247.1 | 0            | 0            | 0            | 0            | 0            | 0            | 0            | 0            | 0            | 0            | 0            | 0            | 0            |
| 6319534   | ORC2    | NP_009616.1 | 0            | 0            | 0            | 0            | 0            | 0            | 0            | 0            | 0            | 0            | 0            | 0            | 0            |
| 6320887   | SAP1    | NP_010966.1 | 0            | 0            | 0            | 0            | 0            | 0            | 0            | 0            | 0            | 0            | 0            | 0            | 0            |
| 6321204   | SEC15   | NP_011281.1 | 0            | 0            | 0            | 0            | 0            | 0            | 0            | 0            | 0            | 0            | 0            | 0            | 0            |
| 6323111   | SRL2    | NP_013183.1 | 0            | 0            | 0            | 0            | 0            | 0            | 0            | 0            | 0            | 0            | 0            | 0            | 0            |
| 398366601 | SSN2    | NP_010731.3 | 0            | 0            | 0            | 0            | 0            | 0            | 0            | 0            | 0            | 0            | 0            | 0            | 0            |
| 6323541   | VPS9    | NP_013612.1 | 0            | 0            | 0            | 0            | 0            | 0            | 0            | 0            | 0            | 0            | 0            | 0            | 0            |
| 6321955   | YAP1801 | NP_012031.1 | 0            | 0            | 0            | 0            | 0            | 0            | 0            | 0            | 0            | 0            | 0            | 0            | 0            |
| 6323215   | EMG1    | NP_013287.1 | 8.73         | 3            | 3            | 0            | 0            | 0            | 0            | 0            | 0            | 0            | 0            | 0            | 15.08        |
| 6319868   | HTL1    | NP_009949.1 | 0            | 0            | 0            | 0            | 0            | 0            | 0            | 0            | 0            | 0            | 0            | 0            | 0            |
| 6321537   | MDR1    | NP_011614.1 | 0            | 0            | 0            | 0            | 0            | 0            | 1.68         | 1            | 1            | 0            | 0            | 0            | 0.84         |



























Table S1 - Smith-Kinnaman, *et al* (2014) Abbreviations: %SC = percent sequence coverage, UP = unique peptides, PSM = peptide spectrum matches

| Accession | Acronym | NP_value    | %SC          | UP           | # PSM        | %SC          |
|-----------|---------|-------------|--------------|--------------|--------------|--------------|--------------|--------------|--------------|--------------|--------------|--------------|--------------|--------------|--------------|
|           |         |             | BY4741_TAP_1 | BY4741_TAP_1 | BY4741_TAP_1 | BY4741_TAP_2 |
| 398364647 | SLM4    | NP_009633.3 | 0            | 0            | 0            | 0            | 0            | 0            | 0            | 0            | 0            | 0            | 0            | 0            | 0            |
| 6324450   | SMF1    | NP_014519.1 | 0            | 0            | 0            | 0            | 0            | 0            | 0            | 0            | 0            | 0            | 0            | 0            | 0            |
| 6320105   | SNU23   | NP_010185.1 | 0            | 0            | 0            | 0            | 0            | 0            | 0            | 0            | 0            | 0            | 0            | 0            | 0            |
| 398366077 | SPC19   | NP_010487.3 | 0            | 0            | 0            | 0            | 0            | 0            | 0            | 0            | 0            | 0            | 0            | 0            | 0            |
| 6323175   | SPE4    | NP_013247.1 | 0            | 0            | 0            | 0            | 0            | 0            | 0            | 0            | 0            | 0            | 0            | 0            | 0            |
| 6322832   | SPT23   | NP_012905.1 | 0            | 0            | 0            | 0            | 0            | 0            | 0            | 0            | 0            | 0            | 0            | 0            | 0            |
| 398366615 | TFB3    | NP_010748.3 | 0            | 0            | 0            | 0            | 0            | 0            | 0            | 0            | 0            | 0            | 0            | 0            | 0            |
| 6320032   | UGX2    | NP_010112.1 | 0            | 0            | 0            | 0            | 0            | 0            | 0            | 0            | 0            | 0            | 0            | 0            | 0            |
| 6323960   | YME2    | NP_014031.1 | 0            | 0            | 0            | 0            | 0            | 0            | 0            | 0            | 0            | 0            | 0            | 0            | 0            |
| 398365297 | YOS9    | NP_010342.3 | 0            | 0            | 0            | 0            | 0            | 0            | 0            | 0            | 0            | 0            | 0            | 0            | 0            |
| 6323821   | ALD3    | NP_013892.1 | 0            | 0            | 0            | 0            | 0            | 0            | 0            | 0            | 0            | 0            | 0            | 0            | 1.38         |
| 6325392   | MSS18   | NP_015460.1 | 0            | 0            | 0            | 0            | 0            | 0            | 0            | 0            | 0            | 3.36         | 1            | 1            | 0            |
| 6321895   | SBE22   | NP_011971.1 | 0            | 0            | 0            | 0            | 0            | 0            | 0            | 0            | 0            | 0.94         | 1            | 1            | 0            |
| 6323844   | SGS1    | NP_013915.1 | 0            | 0            | 0            | 0            | 0            | 0            | 0            | 0            | 0            | 1.04         | 1            | 1            | 0            |
| 6321230   | SIP2    | NP_011307.1 | 0            | 0            | 0            | 0            | 0            | 0            | 0            | 0            | 0            | 2.41         | 1            | 1            | 0            |
| 6319783   | VBA3    | NP_009864.1 | 0            | 0            | 0            | 0            | 0            | 0            | 0            | 0            | 0            | 6.77         | 1            | 1            | 0            |
| 6320295   | YDR090C | NP_010375.1 | 0            | 0            | 0            | 0            | 0            | 0            | 0            | 0            | 0            | 9.03         | 1            | 1            | 0            |
| 6320812   | YEL023C | NP_010891.1 | 0            | 0            | 0            | 0            | 0            | 0            | 0            | 0            | 0            | 2.05         | 1            | 1            | 0            |
| 330443522 | YEN1    | NP_010959.2 | 0            | 0            | 0            | 0            | 0            | 0            | 0            | 0            | 0            | 1.19         | 1            | 1            | 0            |
| 6323731   | YMR085W | NP_013802.1 | 0            | 0            | 0            | 0            | 0            | 0            | 0            | 0            | 0            | 3.70         | 1            | 1            | 0            |
| 6323761   | YMR114C | NP_013832.1 | 0            | 0            | 0            | 0            | 0            | 0            | 0            | 0            | 0            | 4.08         | 1            | 1            | 0            |
| 6323599   | CAT2    | NP_013670.1 | 0            | 0            | 0            | 0            | 0            | 0            | 0            | 0            | 0            | 1.79         | 1            | 1            | 0            |
| 6320221   | YDR018C | NP_010301.1 | 0            | 0            | 0            | 0            | 0            | 0            | 0            | 0            | 0            | 3.54         | 1            | 1            | 0            |
| 6324392   | YNR064C | NP_014462.1 | 0            | 0            | 0            | 0            | 0            | 0            | 0            | 0            | 0            | 3.45         | 1            | 1            | 0            |
| 6324597   | AHC1    | NP_014666.1 | 0            | 0            | 0            | 0            | 0            | 0            | 0            | 0            | 0            | 2.65         | 1            | 1            | 0            |
| 6323774   | DLT1    | NP_013845.1 | 0            | 0            | 0            | 0            | 0            | 0            | 0            | 0            | 0            | 2.92         | 1            | 1            | 0            |
| 6323532   | MDM1    | NP_013603.1 | 0            | 0            | 0            | 0            | 0            | 0            | 0            | 0            | 0            | 0.98         | 1            | 1            | 0            |
| 6323098   | MEF1    | NP_013170.1 | 0            | 0            | 0            | 0            | 0            | 0            | 0            | 0            | 0            | 2.50         | 1            | 1            | 0            |
| 6322467   | MHO1    | NP_012541.1 | 0            | 0            | 0            | 0            | 0            | 0            | 0            | 0            | 0            | 8.28         | 1            | 1            | 0            |
| 6322177   | PDR11   | NP_012252.1 | 0            | 0            | 0            | 0            | 0            | 0            | 0.64         | 1            | 1            | 0            | 0            | 0            | 0            |
| 6323099   | XYL2    | NP_013171.1 | 0            | 0            | 0            | 0            | 0            | 0            | 2.81         | 1            | 1            | 0            | 0            | 0            | 0            |
| 14318495  | EPL1    | NP_116629.1 | 0            | 0            | 0            | 0            | 0            | 0            | 0.96         | 1            | 1            | 0            | 0            | 0            | 0            |
| 398364429 | FLC3    | NP_011376.3 | 0            | 0            | 0            | 0            | 0            | 0            | 1.37         | 1            | 1            | 0            | 0            | 0            | 0            |
| 6320193   | GRX6    | NP_010274.1 | 0            | 0            | 0            | 0            | 0            | 0            | 5.63         | 1            | 1            | 0            | 0            | 0            | 0            |
| 398364915 | HUL4    | NP_012570.3 | 0            | 0            | 0            | 0            | 0            | 0            | 1.35         | 1            | 1            | 0            | 0            | 0            | 0            |
| 6325457   | ARR1    | NP_015525.1 | 0            | 0            | 0            | 4.76         | 1            | 1            | 0            | 0            | 0            | 0            | 0            | 0            | 0            |
| 6322660   | PXA2    | NP_012733.1 | 0            | 0            | 0            | 1.64         | 1            | 1            | 0            | 0            | 0            | 0            | 0            | 0            | 0            |















Table S1 - Smith-Kinnaman, *et al* (2014) Abbreviations: %SC = percent sequence coverage, UP = unique peptides, PSM = peptide spectrum matches

| Accession | Acronym | UP                 | # PSM              | %SC                | UP                 | # PSM              | %SC                | UP                 | # PSM              | %SC            | UP             | # PSM          | %SC               | UP                |
|-----------|---------|--------------------|--------------------|--------------------|--------------------|--------------------|--------------------|--------------------|--------------------|----------------|----------------|----------------|-------------------|-------------------|
|           |         | BY4741_F<br>LAG_J1 | BY4741_F<br>LAG_J1 | BY4741_FL<br>AG_J2 | BY4741_F<br>LAG_J2 | BY4741_F<br>LAG_J2 | BY4741_FL<br>AG_J3 | BY4741_F<br>LAG_J3 | BY4741_F<br>LAG_J3 | V5_Rtr1_<br>WT | V5_Rtr1_<br>WT | V5_Rtr1_<br>WT | TAP_Rtr1<br>_WT_1 | TAP_Rtr1<br>_WT_1 |
| 398364847 | RTR1    | 2                  | 3                  | 8.85               | 2                  | 3                  | 0                  | 0                  | 0                  | 19.47          | 7              | 661            | 69.03             | 18                |
| 6320061   | RPB1    | 7                  | 9                  | 3.98               | 7                  | 9                  | 2.19               | 3                  | 4                  | 9.87           | 20             | 188            | 33.81             | 50                |
| 398365417 | RPB2    | 3                  | 3                  | 3.02               | 3                  | 3                  | 0.74               | 1                  | 1                  | 7.84           | 10             | 298            | 36.60             | 38                |
| 398364469 | RPB3    | 1                  | 1                  | 5.35               | 1                  | 1                  | 0                  | 0                  | 0                  | 9.43           | 3              | 63             | 38.68             | 8                 |
| 6322321   | RPB4    | 0                  | 0                  | 0                  | 0                  | 0                  | 13.12              | 2                  | 4                  | 0              | 0              | 0              | 21.72             | 3                 |
| 6319630   | RPB5    | 2                  | 2                  | 13.02              | 2                  | 2                  | 0                  | 0                  | 0                  | 3.72           | 1              | 4              | 41.86             | 6                 |
| 398366567 | RPB7    | 0                  | 0                  | 0                  | 0                  | 0                  | 0                  | 0                  | 0                  | 0              | 0              | 0              | 0                 | 0                 |
| 398365775 | RPB10   | 0                  | 0                  | 0                  | 0                  | 0                  | 15.71              | 1                  | 2                  | 0              | 0              | 0              | 15.71             | 1                 |
| 6325445   | RPB6    | 0                  | 0                  | 0                  | 0                  | 0                  | 0                  | 0                  | 0                  | 0              | 0              | 0              | 26.45             | 2                 |
| 6321368   | RPB9    | 0                  | 0                  | 0                  | 0                  | 0                  | 0                  | 0                  | 0                  | 0              | 0              | 0              | 20.49             | 2                 |
| 6324798   | RPB8    | 0                  | 0                  | 0                  | 0                  | 0                  | 0                  | 0                  | 0                  | 6.85           | 1              | 21             | 25.34             | 3                 |
| 6324569   | RPB11   | 0                  | 0                  | 0                  | 0                  | 0                  | 0                  | 0                  | 0                  | 13.33          | 2              | 23             | 39.17             | 4                 |
| 6323632   | SPT5    | 8                  | 10                 | 8.94               | 8                  | 10                 | 4.33               | 3                  | 3                  | 1.22           | 1              | 8              | 0                 | 0                 |
| 6321625   | TFG1    | 1                  | 2                  | 1.36               | 1                  | 2                  | 0                  | 0                  | 0                  | 1.50           | 1              | 1              | 0                 | 0                 |
| 6321937   | RPB12   | 0                  | 0                  | 0                  | 0                  | 0                  | 28.57              | 1                  | 7                  | 10.00          | 1              | 30             | 40.00             | 3                 |
| 398365043 | TFG2    | 1                  | 1                  | 2.00               | 1                  | 1                  | 2.75               | 1                  | 1                  | 0              | 0              | 0              | 0                 | 0                 |
| 154199603 | IWR1    | 0                  | 0                  | 0                  | 0                  | 0                  | 0                  | 0                  | 0                  | 0              | 0              | 0              | 0                 | 0                 |
| 398365457 | SPT4    | 0                  | 0                  | 0                  | 0                  | 0                  | 0                  | 0                  | 0                  | 0              | 0              | 0              | 0                 | 0                 |
| 6325128   | TAF14   | 1                  | 1                  | 6.56               | 1                  | 1                  | 6.56               | 1                  | 4                  | 0              | 0              | 0              | 0                 | 0                 |
| 398365155 | NPA3    | 3                  | 4                  | 8.83               | 3                  | 4                  | 6.23               | 2                  | 2                  | 9.09           | 3              | 17             | 14.81             | 5                 |
| 6323272   | GPN3    | 0                  | 0                  | 0                  | 0                  | 0                  | 4.78               | 1                  | 1                  | 0              | 0              | 0              | 12.87             | 2                 |
| 6322163   | IRR1    | 0                  | 0                  | 0                  | 0                  | 0                  | 0                  | 0                  | 0                  | 0              | 0              | 0              | 0                 | 0                 |
| 398366099 | RRP41   | 0                  | 0                  | 0                  | 0                  | 0                  | 0                  | 0                  | 0                  | 0              | 0              | 0              | 0                 | 0                 |
| 398366555 | UBA2    | 1                  | 1                  | 2.20               | 1                  | 1                  | 7.23               | 4                  | 4                  | 0              | 0              | 0              | 0                 | 0                 |
| 6323670   | TAP42   | 3                  | 5                  | 7.65               | 3                  | 5                  | 3.55               | 1                  | 2                  | 0              | 0              | 0              | 0                 | 0                 |
| 6323004   | SSA2    | 29                 | 541                | 56.65              | 29                 | 541                | 80.13              | 48                 | 1842               | 13.62          | 8              | 69             | 51.96             | 22                |
| 6319505   | RPL4A   | 12                 | 120                | 37.02              | 12                 | 120                | 50.00              | 15                 | 302                | 9.12           | 4              | 599            | 24.59             | 6                 |
| 398364991 | RPL4B   | 0                  | 0                  | 32.60              | 10                 | 117                | 50.00              | 14                 | 286                | 9.12           | 4              | 599            | 20.72             | 5                 |
| 398365303 | RPL43B  | 5                  | 83                 | 43.48              | 5                  | 83                 | 39.13              | 5                  | 340                | 9.78           | 2              | 238            | 44.57             | 5                 |
| 398364349 | RPL2A   | 4                  | 79                 | 27.17              | 4                  | 79                 | 48.03              | 11                 | 239                | 20.08          | 7              | 655            | 18.50             | 5                 |
| 6325337   | TEF1    | 18                 | 438                | 44.10              | 18                 | 438                | 41.05              | 16                 | 226                | 13.54          | 8              | 221            | 25.55             | 7                 |
| 144228166 | SSA1    | 31                 | 516                | 57.79              | 31                 | 516                | 76.64              | 46                 | 1665               | 17.13          | 10             | 75             | 50.31             | 25                |
| 6319559   | RPL19A  | 6                  | 75                 | 29.63              | 6                  | 75                 | 31.22              | 8                  | 293                | 16.40          | 6              | 130            | 20.63             | 4                 |
| 6320065   | RPL35A  | 5                  | 27                 | 30.83              | 5                  | 27                 | 40.83              | 9                  | 135                | 0              | 0              | 0              | 37.50             | 6                 |
| 398365603 | RPS4A   | 8                  | 32                 | 32.57              | 8                  | 32                 | 48.66              | 14                 | 81                 | 16.09          | 6              | 487            | 23.75             | 6                 |
| 398365321 | RPS6B   | 7                  | 38                 | 33.90              | 7                  | 38                 | 56.36              | 18                 | 190                | 21.61          | 5              | 161            | 34.32             | 10                |
| 398364655 | SSA4    | 15                 | 134                | 28.19              | 15                 | 134                | 21.18              | 18                 | 510                | 5.76           | 4              | 9              | 15.42             | 8                 |

Table S1 - Smith-Kinnaman, *et al* (2014) Abbreviations: %SC = percent sequence coverage, UP = unique peptides, PSM = peptide spectrum matches

| Accession | Acronym | UP                 | # PSM              | %SC                | UP                 | # PSM              | %SC                | UP                 | # PSM              | %SC            | UP             | # PSM          | %SC                | UP                 |
|-----------|---------|--------------------|--------------------|--------------------|--------------------|--------------------|--------------------|--------------------|--------------------|----------------|----------------|----------------|--------------------|--------------------|
|           |         | BY4741_F<br>LAG_J1 | BY4741_F<br>LAG_J1 | BY4741_FL<br>AG_J2 | BY4741_F<br>LAG_J2 | BY4741_F<br>LAG_J2 | BY4741_FL<br>AG_J3 | BY4741_F<br>LAG_J3 | BY4741_F<br>LAG_J3 | V5_Rtr1_<br>WT | V5_Rtr1_<br>WT | V5_Rtr1_<br>WT | TAP_Rtr1_<br>_WT_1 | TAP_Rtr1_<br>_WT_1 |
| 398366603 | RPS17B  | 6                  | 47                 | 52.94              | 6                  | 47                 | 54.41              | 8                  | 158                | 7.35           | 1              | 4              | 55.15              | 10                 |
| 6324533   | RPS15   | 3                  | 29                 | 30.28              | 3                  | 29                 | 30.28              | 3                  | 48                 | 16.90          | 2              | 60             | 38.03              | 4                  |
| 6323104   | RPL10   | 7                  | 118                | 27.60              | 7                  | 118                | 38.91              | 10                 | 103                | 33.03          | 12             | 421            | 15.38              | 3                  |
| 6319396   | SSA3    | 11                 | 117                | 19.72              | 11                 | 117                | 22.65              | 18                 | 436                | 5.70           | 4              | 39             | 13.56              | 7                  |
| 6321786   | RPL14B  | 0                  | 0                  | 39.13              | 6                  | 52                 | 44.93              | 8                  | 152                | 12.32          | 4              | 174            | 18.84              | 3                  |
| 6322847   | RPL14A  | 7                  | 53                 | 45.65              | 7                  | 53                 | 51.45              | 9                  | 159                | 12.32          | 4              | 174            | 18.84              | 3                  |
| 6324670   | RPS7A   | 6                  | 61                 | 31.05              | 6                  | 61                 | 39.47              | 10                 | 224                | 15.79          | 4              | 51             | 53.16              | 9                  |
| 6322668   | RPL17A  | 6                  | 82                 | 36.41              | 6                  | 82                 | 34.78              | 5                  | 328                | 20.11          | 3              | 56             | 28.26              | 4                  |
| 398365285 | CAX4    | 0                  | 0                  | 0                  | 0                  | 0                  | 0                  | 0                  | 0                  | 0              | 0              | 0              | 0                  | 0                  |
| 6322284   | RPL17B  | 6                  | 85                 | 36.41              | 6                  | 85                 | 34.78              | 5                  | 306                | 20.11          | 3              | 56             | 28.26              | 4                  |
| 398364883 | RPS7B   | 7                  | 33                 | 40.00              | 7                  | 33                 | 57.89              | 12                 | 213                | 15.79          | 4              | 51             | 43.68              | 9                  |
| 6323791   | RPL13B  | 0                  | 0                  | 37.69              | 6                  | 25                 | 44.72              | 10                 | 113                | 26.63          | 9              | 1125           | 39.20              | 7                  |
| 6320121   | RPL13A  | 6                  | 25                 | 37.69              | 6                  | 25                 | 44.72              | 10                 | 104                | 26.63          | 9              | 1125           | 37.69              | 6                  |
| 6324120   | SSB2    | 25                 | 473                | 58.73              | 25                 | 473                | 66.56              | 39                 | 906                | 9.30           | 8              | 111            | 38.34              | 15                 |
| 6323577   | RPS1B   | 8                  | 46                 | 35.29              | 8                  | 46                 | 55.69              | 13                 | 199                | 16.47          | 5              | 87             | 38.82              | 8                  |
| 6325157   | ATG21   | 0                  | 0                  | 0                  | 0                  | 0                  | 0                  | 0                  | 0                  | 0              | 0              | 0              | 0                  | 0                  |
| 6323474   | RPS1A   | 6                  | 41                 | 27.45              | 6                  | 41                 | 55.69              | 12                 | 179                | 16.47          | 5              | 87             | 38.82              | 8                  |
| 398364725 | RPL23B  | 6                  | 114                | 43.80              | 6                  | 114                | 46.72              | 8                  | 216                | 5.11           | 1              | 1              | 32.85              | 4                  |
| 6319972   | SSB1    | 25                 | 472                | 58.73              | 25                 | 472                | 66.39              | 38                 | 900                | 10.60          | 9              | 112            | 38.34              | 15                 |
| 154200011 | RPL20B  | 4                  | 47                 | 30.23              | 4                  | 47                 | 39.53              | 8                  | 156                | 23.84          | 6              | 773            | 29.65              | 5                  |
| 6322989   | UBI4    | 2                  | 8                  | 38.16              | 2                  | 8                  | 50.00              | 3                  | 11                 | 17.11          | 1              | 1              | 50.00              | 3                  |
| 9755341   | RPS16A  | 4                  | 24                 | 32.17              | 4                  | 24                 | 58.04              | 8                  | 58                 | 31.47          | 6              | 80             | 49.65              | 7                  |
| 6319378   | RPL32   | 3                  | 35                 | 23.85              | 3                  | 35                 | 36.92              | 5                  | 169                | 35.38          | 6              | 212            | 17.69              | 2                  |
| 6325061   | APL5    | 0                  | 0                  | 0                  | 0                  | 0                  | 1.61               | 1                  | 1                  | 0              | 0              | 0              | 0                  | 0                  |
| 398364505 | RPS3    | 8                  | 40                 | 39.17              | 8                  | 40                 | 52.92              | 11                 | 51                 | 25.42          | 5              | 74             | 47.08              | 10                 |
| 398365351 | RPS13   | 6                  | 44                 | 45.70              | 6                  | 44                 | 58.28              | 9                  | 206                | 7.28           | 1              | 12             | 45.70              | 6                  |
| 6324260   | RPL16B  | 6                  | 28                 | 27.27              | 6                  | 28                 | 32.83              | 10                 | 115                | 22.73          | 7              | 48             | 6.06               | 1                  |
| 398365605 | RPS30B  | 1                  | 3                  | 15.87              | 1                  | 3                  | 30.16              | 2                  | 6                  | 0              | 0              | 0              | 17.46              | 2                  |
| 6323481   | RPL6B   | 6                  | 14                 | 37.50              | 6                  | 14                 | 53.98              | 9                  | 84                 | 30.68          | 8              | 237            | 4.55               | 1                  |
| 398365377 | RPS9B   | 7                  | 18                 | 30.26              | 7                  | 18                 | 43.08              | 12                 | 44                 | 21.03          | 5              | 79             | 23.08              | 4                  |
| 6324265   | YDJ1    | 8                  | 77                 | 27.87              | 8                  | 77                 | 25.92              | 11                 | 47                 | 5.13           | 2              | 13             | 6.60               | 2                  |
| 398364745 | ATP7    | 1                  | 1                  | 7.47               | 1                  | 1                  | 7.47               | 1                  | 1                  | 0              | 0              | 0              | 8.05               | 2                  |
| 6321464   | RPS25A  | 5                  | 13                 | 38.89              | 5                  | 13                 | 39.81              | 6                  | 56                 | 27.78          | 3              | 60             | 31.48              | 5                  |
| 6323077   | RPS0B   | 5                  | 37                 | 29.37              | 5                  | 37                 | 29.37              | 5                  | 45                 | 9.92           | 3              | 135            | 28.97              | 4                  |
| 398365071 | RPS11A  | 4                  | 6                  | 25.64              | 4                  | 6                  | 42.95              | 7                  | 56                 | 19.23          | 3              | 123            | 18.59              | 3                  |
| 6321653   | RPS0A   | 5                  | 37                 | 29.37              | 5                  | 37                 | 19.84              | 4                  | 44                 | 9.92           | 3              | 135            | 28.97              | 4                  |
| 6323465   | CNA1    | 3                  | 3                  | 7.23               | 3                  | 3                  | 2.35               | 1                  | 1                  | 0              | 0              | 0              | 26.40              | 11                 |

Table S1 - Smith-Kinnaman, *et al* (2014) Abbreviations: %SC = percent sequence coverage, UP = unique peptides, PSM = peptide spectrum matches

| Accession | Acronym | UP                 | # PSM              | %SC                | UP                 | # PSM              | %SC                | UP                 | # PSM              | %SC            | UP             | # PSM          | %SC               | UP                |
|-----------|---------|--------------------|--------------------|--------------------|--------------------|--------------------|--------------------|--------------------|--------------------|----------------|----------------|----------------|-------------------|-------------------|
|           |         | BY4741_F<br>LAG_J1 | BY4741_F<br>LAG_J1 | BY4741_FL<br>AG_J2 | BY4741_F<br>LAG_J2 | BY4741_F<br>LAG_J2 | BY4741_FL<br>AG_J3 | BY4741_F<br>LAG_J3 | BY4741_F<br>LAG_J3 | V5_Rtr1_<br>WT | V5_Rtr1_<br>WT | V5_Rtr1_<br>WT | TAP_Rtr1<br>_WT_1 | TAP_Rtr1<br>_WT_1 |
| 6321335   | RPL28   | 2                  | 22                 | 16.11              | 2                  | 22                 | 35.57              | 7                  | 67                 | 16.78          | 3              | 178            | 22.15             | 3                 |
| 6322505   | SSC1    | 25                 | 166                | 45.87              | 25                 | 166                | 55.05              | 32                 | 338                | 5.81           | 4              | 7              | 14.53             | 6                 |
| 6323567   | RPL6A   | 5                  | 13                 | 25.57              | 5                  | 13                 | 48.86              | 9                  | 72                 | 31.82          | 9              | 215            | 4.55              | 1                 |
| 6321754   | RPL8A   | 11                 | 91                 | 42.19              | 11                 | 91                 | 56.25              | 19                 | 186                | 27.73          | 11             | 405            | 32.81             | 8                 |
| 6322984   | RPL8B   | 13                 | 93                 | 49.22              | 13                 | 93                 | 57.03              | 20                 | 189                | 27.73          | 11             | 513            | 36.33             | 9                 |
| 6323615   | RPS18B  | 6                  | 61                 | 43.15              | 6                  | 61                 | 59.59              | 9                  | 114                | 13.70          | 4              | 67             | 43.15             | 5                 |
| 398366307 | RPA190  | 12                 | 16                 | 8.71               | 12                 | 16                 | 4.21               | 5                  | 7                  | 3.61           | 6              | 25             | 0                 | 0                 |
| 6324637   | RPL3    | 11                 | 43                 | 27.13              | 11                 | 43                 | 42.38              | 16                 | 245                | 30.49          | 15             | 789            | 0                 | 0                 |
| 6320128   | RPL31A  | 4                  | 28                 | 38.94              | 4                  | 28                 | 61.95              | 8                  | 85                 | 31.86          | 5              | 399            | 30.09             | 3                 |
| 398366143 | RPL31B  | 0                  | 0                  | 30.97              | 3                  | 27                 | 53.98              | 7                  | 78                 | 31.86          | 5              | 354            | 30.09             | 3                 |
| 398365761 | RPS23A  | 3                  | 27                 | 33.79              | 3                  | 27                 | 34.48              | 4                  | 24                 | 19.31          | 3              | 18             | 18.62             | 1                 |
| 6322137   | RPL34B  | 1                  | 1                  | 6.61               | 1                  | 1                  | 6.61               | 1                  | 14                 | 6.61           | 1              | 20             | 6.61              | 1                 |
| 6321315   | RPS2    | 2                  | 20                 | 11.02              | 2                  | 20                 | 35.43              | 7                  | 67                 | 9.45           | 3              | 30             | 6.69              | 1                 |
| 6320949   | RPS8B   | 5                  | 55                 | 35.50              | 5                  | 55                 | 34.50              | 6                  | 62                 | 12.00          | 3              | 5              | 34.50             | 5                 |
| 6321798   | RPL27A  | 0                  | 0                  | 37.50              | 6                  | 26                 | 42.65              | 7                  | 137                | 14.71          | 3              | 475            | 15.44             | 2                 |
| 6325176   | RPS9A   | 5                  | 12                 | 21.83              | 5                  | 12                 | 43.15              | 11                 | 34                 | 12.69          | 4              | 75             | 14.72             | 3                 |
| 86558907  | RHR2    | 7                  | 12                 | 32.80              | 7                  | 12                 | 26.40              | 6                  | 22                 | 3.60           | 1              | 14             | 26.40             | 6                 |
| 6322058   | RPL16A  | 7                  | 23                 | 31.66              | 7                  | 23                 | 37.69              | 12                 | 100                | 31.16          | 10             | 97             | 0                 | 0                 |
| 6324027   | RPS19B  | 5                  | 45                 | 45.14              | 5                  | 45                 | 60.42              | 10                 | 89                 | 7.64           | 2              | 12             | 53.47             | 9                 |
| 6323090   | RPL22A  | 3                  | 12                 | 55.37              | 3                  | 12                 | 61.16              | 4                  | 40                 | 0              | 0              | 0              | 61.16             | 4                 |
| 6320142   | RPS29B  | 0                  | 0                  | 0                  | 0                  | 0                  | 0                  | 0                  | 0                  | 0              | 0              | 0              | 32.14             | 2                 |
| 6324807   | KIN4    | 0                  | 0                  | 0                  | 0                  | 0                  | 0                  | 0                  | 0                  | 0              | 0              | 0              | 0                 | 0                 |
| 6321522   | RPL11B  | 6                  | 26                 | 31.03              | 6                  | 26                 | 36.78              | 7                  | 42                 | 11.49          | 2              | 41             | 25.86             | 5                 |
| 6322583   | RPS5    | 6                  | 149                | 29.78              | 6                  | 149                | 30.22              | 7                  | 86                 | 13.78          | 3              | 10             | 34.22             | 8                 |
| 6325126   | RPL5    | 5                  | 58                 | 19.19              | 5                  | 58                 | 45.79              | 9                  | 88                 | 20.20          | 7              | 162            | 3.03              | 1                 |
| 6323073   | PDC1    | 19                 | 234                | 43.69              | 19                 | 234                | 49.20              | 21                 | 433                | 8.88           | 6              | 441            | 22.56             | 8                 |
| 398366277 | VMA4    | 13                 | 247                | 53.22              | 13                 | 247                | 54.51              | 16                 | 199                | 17.60          | 4              | 31             | 21.89             | 5                 |
| 6323824   | HOT1    | 0                  | 0                  | 0                  | 0                  | 0                  | 0                  | 0                  | 0                  | 0              | 0              | 0              | 0                 | 0                 |
| 6325066   | NAB3    | 0                  | 0                  | 0                  | 0                  | 0                  | 2.99               | 2                  | 2                  | 0              | 0              | 0              | 0                 | 0                 |
| 398364517 | RPS24A  | 5                  | 58                 | 31.85              | 5                  | 58                 | 48.89              | 8                  | 120                | 20.00          | 3              | 30             | 40.00             | 6                 |
| 6321362   | RPL7A   | 9                  | 58                 | 43.44              | 9                  | 58                 | 49.18              | 12                 | 128                | 28.69          | 8              | 621            | 18.03             | 3                 |
| 6325058   | RPL7B   | 9                  | 49                 | 43.44              | 9                  | 49                 | 49.18              | 12                 | 124                | 28.69          | 8              | 628            | 18.03             | 3                 |
| 37362649  | GUS1    | 20                 | 96                 | 33.76              | 20                 | 96                 | 22.18              | 13                 | 90                 | 8.76           | 7              | 61             | 2.12              | 1                 |
| 398365909 | RPL24B  | 2                  | 18                 | 15.48              | 2                  | 18                 | 27.10              | 6                  | 140                | 12.90          | 2              | 4              | 9.03              | 1                 |
| 6324707   | EFT1    | 32                 | 590                | 48.93              | 32                 | 590                | 56.41              | 37                 | 629                | 13.90          | 13             | 486            | 14.61             | 8                 |
| 6323376   | RPL26A  | 0                  | 0                  | 34.65              | 6                  | 13                 | 51.18              | 10                 | 59                 | 22.05          | 6              | 177            | 44.09             | 8                 |
| 116006491 | RPL26B  | 7                  | 18                 | 35.43              | 7                  | 18                 | 51.18              | 11                 | 61                 | 22.05          | 6              | 186            | 44.09             | 8                 |



Table S1 - Smith-Kinnaman, *et al* (2014) Abbreviations: %SC = percent sequence coverage, UP = unique peptides, PSM = peptide spectrum matches

| Accession | Acronym | UP                 | # PSM              | %SC                | UP                 | # PSM              | %SC                | UP                 | # PSM              | %SC            | UP             | # PSM          | %SC               | UP                |
|-----------|---------|--------------------|--------------------|--------------------|--------------------|--------------------|--------------------|--------------------|--------------------|----------------|----------------|----------------|-------------------|-------------------|
|           |         | BY4741_F<br>LAG_J1 | BY4741_F<br>LAG_J1 | BY4741_FL<br>AG_J2 | BY4741_F<br>LAG_J2 | BY4741_F<br>LAG_J2 | BY4741_FL<br>AG_J3 | BY4741_F<br>LAG_J3 | BY4741_F<br>LAG_J3 | V5_Rtr1_<br>WT | V5_Rtr1_<br>WT | V5_Rtr1_<br>WT | TAP_Rtr1<br>_WT_1 | TAP_Rtr1<br>_WT_1 |
| 6325006   | RPL36B  | 4                  | 23                 | 40.00              | 4                  | 23                 | 49.00              | 6                  | 88                 | 34.00          | 5              | 120            | 33.00             | 4                 |
| 6323848   | RPL36A  | 0                  | 0                  | 31.00              | 3                  | 15                 | 50.00              | 6                  | 79                 | 34.00          | 4              | 70             | 33.00             | 4                 |
| 398366579 | RPL12B  | 6                  | 95                 | 49.70              | 6                  | 95                 | 56.36              | 7                  | 139                | 4.85           | 1              | 1              | 33.33             | 4                 |
| 6321540   | NOP7    | 1                  | 1                  | 1.49               | 1                  | 1                  | 4.30               | 2                  | 5                  | 0              | 0              | 0              | 0                 | 0                 |
| 398365599 | PDC6    | 3                  | 22                 | 6.93               | 3                  | 22                 | 6.93               | 3                  | 93                 | 1.60           | 1              | 10             | 3.37              | 1                 |
| 6323163   | PDC5    | 2                  | 14                 | 5.15               | 2                  | 14                 | 9.59               | 3                  | 77                 | 1.78           | 1              | 18             | 3.37              | 1                 |
| 6323583   | CMP2    | 4                  | 4                  | 7.78               | 4                  | 4                  | 4.97               | 2                  | 3                  | 0              | 0              | 0              | 11.42             | 5                 |
| 398365991 | CLC1    | 1                  | 2                  | 6.87               | 1                  | 2                  | 6.87               | 1                  | 2                  | 0              | 0              | 0              | 15.45             | 3                 |
| 37362619  | RXT2    | 2                  | 2                  | 5.12               | 2                  | 2                  | 0                  | 0                  | 0                  | 0              | 0              | 0              | 0                 | 0                 |
| 10383793  | RPS14A  | 5                  | 37                 | 40.15              | 5                  | 37                 | 65.69              | 10                 | 135                | 34.31          | 6              | 105            | 43.80             | 7                 |
| 6322271   | RPS22A  | 3                  | 52                 | 24.62              | 3                  | 52                 | 24.62              | 3                  | 24                 | 13.08          | 2              | 33             | 25.38             | 3                 |
| 6321407   | RPL24A  | 4                  | 23                 | 22.58              | 4                  | 23                 | 27.74              | 7                  | 163                | 10.97          | 2              | 4              | 16.77             | 2                 |
| 6323357   | RPL38   | 2                  | 14                 | 32.05              | 2                  | 14                 | 50.00              | 4                  | 67                 | 0              | 0              | 0              | 33.33             | 3                 |
| 398366183 | HTB1    | 6                  | 56                 | 39.69              | 6                  | 56                 | 31.30              | 5                  | 77                 | 8.40           | 1              | 1              | 18.32             | 2                 |
| 398364287 | GCN1    | 20                 | 35                 | 8.16               | 20                 | 35                 | 2.10               | 5                  | 6                  | 2.96           | 7              | 61             | 0                 | 0                 |
| 6320016   | VMA1    | 33                 | 228                | 33.43              | 33                 | 228                | 28.38              | 26                 | 154                | 9.62           | 10             | 244            | 2.80              | 2                 |
| 14318481  | TUB2    | 10                 | 72                 | 27.79              | 10                 | 72                 | 35.01              | 11                 | 62                 | 4.38           | 3              | 99             | 8.10              | 3                 |
| 398364585 | KAR2    | 20                 | 48                 | 32.40              | 20                 | 48                 | 31.82              | 21                 | 127                | 1.61           | 1              | 1              | 3.96              | 2                 |
| 6323196   | RPS31   | 1                  | 2                  | 10.53              | 1                  | 2                  | 32.89              | 2                  | 11                 | 0              | 0              | 0              | 0                 | 0                 |
| 6321013   | PAB1    | 16                 | 60                 | 35.18              | 16                 | 60                 | 49.74              | 22                 | 128                | 7.45           | 5              | 24             | 28.08             | 13                |
| 6324993   | FUM1    | 1                  | 2                  | 2.66               | 1                  | 2                  | 5.33               | 2                  | 2                  | 0              | 0              | 0              | 0                 | 0                 |
| 398366075 | RPS29A  | 1                  | 2                  | 14.29              | 1                  | 2                  | 14.29              | 1                  | 3                  | 0              | 0              | 0              | 32.14             | 2                 |
| 6322755   | YJU2    | 2                  | 2                  | 11.15              | 2                  | 2                  | 0                  | 0                  | 0                  | 0              | 0              | 0              | 0                 | 0                 |
| 398366059 | PLP2    | 2                  | 5                  | 7.34               | 2                  | 5                  | 0                  | 0                  | 0                  | 0              | 0              | 0              | 0                 | 0                 |
| 6320718   | SMT3    | 1                  | 1                  | 6.93               | 1                  | 1                  | 6.93               | 1                  | 1                  | 0              | 0              | 0              | 0                 | 0                 |
| 398365031 | YBR139W | 0                  | 0                  | 0                  | 0                  | 0                  | 0                  | 0                  | 0                  | 0              | 0              | 0              | 3.35              | 1                 |
| 6321850   | FYV4    | 0                  | 0                  | 0                  | 0                  | 0                  | 0                  | 0                  | 0                  | 0              | 0              | 0              | 0                 | 0                 |
| 398366083 | TDH3    | 14                 | 416                | 49.70              | 14                 | 416                | 63.86              | 15                 | 408                | 24.40          | 10             | 401            | 46.08             | 12                |
| 6319279   | CDC19   | 21                 | 122                | 55.60              | 21                 | 122                | 58.60              | 25                 | 144                | 18.20          | 10             | 410            | 31.60             | 11                |
| 6322468   | TDH2    | 13                 | 389                | 47.59              | 13                 | 389                | 50.30              | 13                 | 399                | 21.99          | 9              | 397            | 45.78             | 11                |
| 6321249   | RPS26A  | 0                  | 0                  | 26.05              | 3                  | 11                 | 26.05              | 3                  | 37                 | 13.45          | 2              | 68             | 20.17             | 2                 |
| 6321772   | RPS20   | 6                  | 16                 | 45.45              | 6                  | 16                 | 33.88              | 6                  | 25                 | 27.27          | 5              | 22             | 9.92              | 1                 |
| 14318474  | SEC53   | 7                  | 20                 | 31.10              | 7                  | 20                 | 24.02              | 5                  | 14                 | 5.51           | 1              | 12             | 5.91              | 1                 |
| 6320589   | YRA1    | 4                  | 17                 | 20.80              | 4                  | 17                 | 19.91              | 4                  | 9                  | 3.54           | 1              | 1              | 19.91             | 4                 |
| 6320805   | ECM10   | 0                  | 0                  | 12.27              | 9                  | 64                 | 12.27              | 9                  | 74                 | 4.19           | 3              | 4              | 2.80              | 1                 |
| 6323776   | ECM16   | 0                  | 0                  | 0                  | 0                  | 0                  | 0                  | 0                  | 0                  | 0              | 0              | 0              | 0                 | 0                 |
| 6320596   | RVS167  | 2                  | 3                  | 4.98               | 2                  | 3                  | 0                  | 0                  | 0                  | 2.07           | 1              | 6              | 0                 | 0                 |

Table S1 - Smith-Kinnaman, *et al* (2014) Abbreviations: %SC = percent sequence coverage, UP = unique peptides, PSM = peptide spectrum matches

| Accession | Acronym  | UP                 | # PSM              | %SC                | UP                 | # PSM              | %SC                | UP                 | # PSM              | %SC            | UP             | # PSM          | %SC               | UP                |
|-----------|----------|--------------------|--------------------|--------------------|--------------------|--------------------|--------------------|--------------------|--------------------|----------------|----------------|----------------|-------------------|-------------------|
|           |          | BY4741_F<br>LAG_J1 | BY4741_F<br>LAG_J1 | BY4741_FL<br>AG_J2 | BY4741_F<br>LAG_J2 | BY4741_F<br>LAG_J2 | BY4741_FL<br>AG_J3 | BY4741_F<br>LAG_J3 | BY4741_F<br>LAG_J3 | V5_Rtr1_<br>WT | V5_Rtr1_<br>WT | V5_Rtr1_<br>WT | TAP_Rtr1<br>_WT_1 | TAP_Rtr1<br>_WT_1 |
| 398366359 | SLH1     | 1                  | 2                  | 0.46               | 1                  | 2                  | 0                  | 0                  | 0                  | 0              | 0              | 0              | 0                 | 0                 |
| 6324321   | SIS1     | 6                  | 9                  | 26.14              | 6                  | 9                  | 24.72              | 6                  | 16                 | 4.55           | 1              | 1              | 10.80             | 2                 |
| 6319447   | NCL1     | 9                  | 11                 | 16.52              | 9                  | 11                 | 10.23              | 5                  | 17                 | 4.24           | 2              | 16             | 0                 | 0                 |
| 6323112   | EMP70    | 1                  | 1                  | 2.40               | 1                  | 1                  | 4.05               | 2                  | 2                  | 0              | 0              | 0              | 0                 | 0                 |
| 6324595   | SFM1     | 0                  | 0                  | 0                  | 0                  | 0                  | 16.90              | 3                  | 4                  | 0              | 0              | 0              | 0                 | 0                 |
| 330443411 | UBP13    | 1                  | 1                  | 1.87               | 1                  | 1                  | 0                  | 0                  | 0                  | 0              | 0              | 0              | 0                 | 0                 |
| 6323868   | EFR3     | 0                  | 0                  | 0                  | 0                  | 0                  | 0                  | 0                  | 0                  | 0              | 0              | 0              | 0                 | 0                 |
| 330443676 | CDC34    | 3                  | 5                  | 10.58              | 3                  | 5                  | 6.92               | 3                  | 3                  | 1.92           | 1              | 1              | 0                 | 0                 |
| 6320615   | TRS120   | 1                  | 1                  | 0.93               | 1                  | 1                  | 0                  | 0                  | 0                  | 0              | 0              | 0              | 0                 | 0                 |
| 6323487   | FMP27    | 1                  | 1                  | 0.34               | 1                  | 1                  | 0                  | 0                  | 0                  | 0              | 0              | 0              | 0                 | 0                 |
| 6320231   | REG1     | 0                  | 0                  | 0                  | 0                  | 0                  | 4.64               | 3                  | 4                  | 0.89           | 1              | 8              | 0                 | 0                 |
| 6324585   | AUS1     | 0                  | 0                  | 0                  | 0                  | 0                  | 0                  | 0                  | 0                  | 0              | 0              | 0              | 0                 | 0                 |
| 6325048   | RKM1     | 0                  | 0                  | 0                  | 0                  | 0                  | 7.03               | 3                  | 6                  | 0              | 0              | 0              | 0                 | 0                 |
| 6323732   | SEG1     | 0                  | 0                  | 0                  | 0                  | 0                  | 0                  | 0                  | 0                  | 0              | 0              | 0              | 0                 | 0                 |
| 398364779 | YGL041W- | 0                  | 0                  | 0                  | 0                  | 0                  | 0                  | 0                  | 0                  | 0              | 0              | 0              | 13.64             | 1                 |
| 398365827 | CAF130   | 0                  | 0                  | 0                  | 0                  | 0                  | 0                  | 0                  | 0                  | 0              | 0              | 0              | 0                 | 0                 |
| 6325063   | RSA1     | 0                  | 0                  | 0                  | 0                  | 0                  | 0                  | 0                  | 0                  | 0              | 0              | 0              | 0                 | 0                 |
| 398365559 | MSH6     | 0                  | 0                  | 1.05               | 1                  | 1                  | 0                  | 0                  | 0                  | 1.13           | 1              | 2              | 0                 | 0                 |
| 398365727 | YNR034W- | 3                  | 10                 | 40.82              | 3                  | 10                 | 0                  | 0                  | 0                  | 0              | 0              | 0              | 0                 | 0                 |
| 6323683   | YET2     | 0                  | 0                  | 0                  | 0                  | 0                  | 0                  | 0                  | 0                  | 0              | 0              | 0              | 0                 | 0                 |
| 330443366 | GPB2     | 0                  | 0                  | 0                  | 0                  | 0                  | 0                  | 0                  | 0                  | 0              | 0              | 0              | 0                 | 0                 |
| 6325012   | HUT1     | 0                  | 0                  | 0                  | 0                  | 0                  | 0                  | 0                  | 0                  | 0              | 0              | 0              | 0                 | 0                 |
| 99030927  | KKQ8     | 0                  | 0                  | 0                  | 0                  | 0                  | 0                  | 0                  | 0                  | 0              | 0              | 0              | 0                 | 0                 |
| 398364567 | MAD1     | 0                  | 0                  | 0                  | 0                  | 0                  | 0                  | 0                  | 0                  | 0              | 0              | 0              | 0                 | 0                 |
| 6320763   | RMD6     | 0                  | 0                  | 0                  | 0                  | 0                  | 0                  | 0                  | 0                  | 0              | 0              | 0              | 0                 | 0                 |
| 398365009 | MEC1     | 56                 | 325                | 28.25              | 56                 | 325                | 23.48              | 49                 | 148                | 0              | 0              | 0              | 0                 | 0                 |
| 398364407 | RPL9A    | 7                  | 109                | 48.69              | 7                  | 109                | 51.31              | 8                  | 248                | 11.52          | 3              | 257            | 25.13             | 4                 |
| 6324298   | HHF2     | 4                  | 30                 | 40.78              | 4                  | 30                 | 41.75              | 5                  | 28                 | 0              | 0              | 0              | 29.13             | 3                 |
| 6324262   | RPL9B    | 7                  | 98                 | 48.69              | 7                  | 98                 | 50.26              | 7                  | 177                | 16.23          | 4              | 260            | 15.18             | 3                 |
| 398364523 | TDH1     | 8                  | 312                | 28.92              | 8                  | 312                | 26.51              | 6                  | 212                | 12.65          | 5              | 270            | 35.24             | 9                 |
| 398364951 | VMA2     | 26                 | 348                | 60.54              | 26                 | 348                | 61.32              | 26                 | 192                | 10.44          | 6              | 281            | 28.43             | 10                |
| 6321333   | ARC1     | 6                  | 17                 | 17.29              | 6                  | 17                 | 14.89              | 6                  | 21                 | 7.98           | 3              | 10             | 0                 | 0                 |
| 6321408   | RPL30    | 3                  | 80                 | 38.10              | 3                  | 80                 | 67.62              | 7                  | 108                | 8.57           | 1              | 5              | 39.05             | 3                 |
| 6324445   | RPL25    | 5                  | 22                 | 35.21              | 5                  | 22                 | 45.07              | 8                  | 116                | 16.90          | 2              | 16             | 19.01             | 2                 |
| 6325114   | RPL33A   | 2                  | 11                 | 24.30              | 2                  | 11                 | 32.71              | 4                  | 30                 | 15.89          | 2              | 82             | 0                 | 0                 |
| 398365881 | RPL33B   | 2                  | 9                  | 24.30              | 2                  | 9                  | 31.78              | 3                  | 14                 | 15.89          | 2              | 82             | 0                 | 0                 |
| 398364339 | THS1     | 20                 | 43                 | 31.74              | 20                 | 43                 | 29.02              | 17                 | 58                 | 2.45           | 2              | 12             | 6.13              | 3                 |

Table S1 - Smith-Kinnaman, *et al* (2014) Abbreviations: %SC = percent sequence coverage, UP = unique peptides, PSM = peptide spectrum matches

| Accession | Acronym | UP                 | # PSM              | %SC                | UP                 | # PSM              | %SC                | UP                 | # PSM              | %SC            | UP             | # PSM          | %SC               | UP                |
|-----------|---------|--------------------|--------------------|--------------------|--------------------|--------------------|--------------------|--------------------|--------------------|----------------|----------------|----------------|-------------------|-------------------|
|           |         | BY4741_F<br>LAG_J1 | BY4741_F<br>LAG_J1 | BY4741_FL<br>AG_J2 | BY4741_F<br>LAG_J2 | BY4741_F<br>LAG_J2 | BY4741_FL<br>AG_J3 | BY4741_F<br>LAG_J3 | BY4741_F<br>LAG_J3 | V5_Rtr1_<br>WT | V5_Rtr1_<br>WT | V5_Rtr1_<br>WT | TAP_Rtr1<br>_WT_1 | TAP_Rtr1<br>_WT_1 |
| 330443609 | URA2    | 47                 | 95                 | 26.65              | 47                 | 95                 | 16.76              | 30                 | 81                 | 5.92           | 13             | 143            | 5.19              | 8                 |
| 6323209   | SAM1    | 7                  | 20                 | 17.80              | 7                  | 20                 | 55.24              | 16                 | 123                | 5.76           | 3              | 95             | 0                 | 0                 |
| 398364415 | HXK1    | 5                  | 11                 | 13.81              | 5                  | 11                 | 5.98               | 3                  | 4                  | 3.51           | 2              | 3              | 7.22              | 2                 |
| 6321232   | CHC1    | 17                 | 23                 | 12.89              | 17                 | 23                 | 8.29               | 10                 | 13                 | 1.33           | 2              | 4              | 0.97              | 1                 |
| 6322352   | UTP10   | 3                  | 3                  | 2.09               | 3                  | 3                  | 0                  | 0                  | 0                  | 0              | 0              | 0              | 0                 | 0                 |
| 398366655 | SAM2    | 7                  | 18                 | 17.45              | 7                  | 18                 | 44.53              | 15                 | 85                 | 8.33           | 3              | 33             | 0                 | 0                 |
| 6322115   | RPN2    | 13                 | 20                 | 15.03              | 13                 | 20                 | 6.67               | 6                  | 7                  | 3.07           | 3              | 14             | 1.59              | 1                 |
| 6320073   | RPP1B   | 1                  | 13                 | 15.09              | 1                  | 13                 | 47.17              | 2                  | 139                | 0              | 0              | 0              | 15.09             | 1                 |
| 6320122   | RPP1A   | 2                  | 8                  | 28.30              | 2                  | 8                  | 58.49              | 3                  | 7                  | 0              | 0              | 0              | 0                 | 0                 |
| 6323693   | ERB1    | 2                  | 3                  | 2.48               | 2                  | 3                  | 6.69               | 5                  | 9                  | 1.36           | 1              | 1              | 0                 | 0                 |
| 6320784   | VMA8    | 0                  | 0                  | 0                  | 0                  | 0                  | 8.59               | 2                  | 2                  | 12.50          | 4              | 32             | 8.59              | 2                 |
| 6323087   | SHM2    | 12                 | 70                 | 26.87              | 12                 | 70                 | 15.57              | 6                  | 26                 | 12.79          | 7              | 84             | 6.18              | 2                 |
| 6320119   | SUB2    | 12                 | 37                 | 29.60              | 12                 | 37                 | 31.61              | 13                 | 24                 | 11.21          | 4              | 29             | 7.62              | 2                 |
| 6320573   | ESF1    | 0                  | 0                  | 0                  | 0                  | 0                  | 0                  | 0                  | 0                  | 0              | 0              | 0              | 0                 | 0                 |
| 6323179   | STM1    | 1                  | 1                  | 2.93               | 1                  | 1                  | 32.60              | 6                  | 13                 | 15.75          | 3              | 5              | 16.12             | 2                 |
| 398366241 | SEN1    | 0                  | 0                  | 0                  | 0                  | 0                  | 0                  | 0                  | 0                  | 0              | 0              | 0              | 0                 | 0                 |
| 6323763   | ASC1    | 5                  | 9                  | 18.18              | 5                  | 9                  | 20.69              | 6                  | 14                 | 4.70           | 1              | 1              | 3.76              | 1                 |
| 6324772   | BFR1    | 10                 | 21                 | 22.55              | 10                 | 21                 | 26.38              | 11                 | 27                 | 2.34           | 1              | 1              | 11.49             | 4                 |
| 6320175   | ARP2    | 5                  | 12                 | 17.14              | 5                  | 12                 | 16.37              | 4                  | 9                  | 2.81           | 1              | 3              | 0                 | 0                 |
| 398366669 | EMI2    | 1                  | 1                  | 2.40               | 1                  | 1                  | 0                  | 0                  | 0                  | 0              | 0              | 0              | 0                 | 0                 |
| 6323389   | RSC2    | 3                  | 4                  | 3.60               | 3                  | 4                  | 0                  | 0                  | 0                  | 1.35           | 1              | 1              | 0                 | 0                 |
| 6324663   | VPS21   | 6                  | 18                 | 31.90              | 6                  | 18                 | 60.48              | 10                 | 48                 | 12.38          | 2              | 4              | 0                 | 0                 |
| 6319543   | TAT1    | 1                  | 1                  | 1.94               | 1                  | 1                  | 0                  | 0                  | 0                  | 0              | 0              | 0              | 0                 | 0                 |
| 6325417   | KRE6    | 3                  | 11                 | 5.97               | 3                  | 11                 | 0                  | 0                  | 0                  | 2.08           | 1              | 4              | 0                 | 0                 |
| 6324021   | KRI1    | 2                  | 2                  | 4.06               | 2                  | 2                  | 0                  | 0                  | 0                  | 0              | 0              | 0              | 0                 | 0                 |
| 6323454   | YLR422W | 0                  | 0                  | 0                  | 0                  | 0                  | 0                  | 0                  | 0                  | 0.47           | 1              | 2              | 0                 | 0                 |
| 6319756   | PAF1    | 0                  | 0                  | 0                  | 0                  | 0                  | 5.39               | 1                  | 1                  | 0              | 0              | 0              | 0                 | 0                 |
| 6323725   | SEC14   | 13                 | 101                | 53.62              | 13                 | 101                | 60.53              | 14                 | 127                | 0              | 0              | 0              | 0                 | 0                 |
| 6323368   | SGD1    | 0                  | 0                  | 0                  | 0                  | 0                  | 0                  | 0                  | 0                  | 0              | 0              | 0              | 0                 | 0                 |
| 6322598   | IML1    | 1                  | 1                  | 0.69               | 1                  | 1                  | 0                  | 0                  | 0                  | 0              | 0              | 0              | 0                 | 0                 |
| 398366503 | YDR341C | 7                  | 12                 | 12.19              | 7                  | 12                 | 12.03              | 7                  | 10                 | 1.65           | 1              | 5              | 0                 | 0                 |
| 6320423   | RAD9    | 0                  | 0                  | 0                  | 0                  | 0                  | 0                  | 0                  | 0                  | 0              | 0              | 0              | 0                 | 0                 |
| 6325147   | GDE1    | 0                  | 0                  | 0                  | 0                  | 0                  | 0                  | 0                  | 0                  | 0              | 0              | 0              | 0                 | 0                 |
| 6319585   | CMD1    | 4                  | 11                 | 38.10              | 4                  | 11                 | 8.84               | 1                  | 2                  | 6.12           | 1              | 7              | 0                 | 0                 |
| 6322946   | PTR2    | 2                  | 4                  | 4.16               | 2                  | 4                  | 0                  | 0                  | 0                  | 0              | 0              | 0              | 0                 | 0                 |
| 398366323 | GND2    | 0                  | 0                  | 4.47               | 2                  | 2                  | 2.03               | 1                  | 2                  | 0              | 0              | 0              | 2.03              | 1                 |
| 6324231   | RAS2    | 2                  | 2                  | 11.49              | 2                  | 2                  | 15.84              | 3                  | 12                 | 0              | 0              | 0              | 0                 | 0                 |

Table S1 - Smith-Kinnaman, *et al* (2014) Abbreviations: %SC = percent sequence coverage, UP = unique peptides, PSM = peptide spectrum matches

| Accession | Acronym | UP                 | # PSM              | %SC                | UP                 | # PSM              | %SC                | UP                 | # PSM              | %SC            | UP             | # PSM          | %SC               | UP                |
|-----------|---------|--------------------|--------------------|--------------------|--------------------|--------------------|--------------------|--------------------|--------------------|----------------|----------------|----------------|-------------------|-------------------|
|           |         | BY4741_F<br>LAG_J1 | BY4741_F<br>LAG_J1 | BY4741_FL<br>AG_J2 | BY4741_F<br>LAG_J2 | BY4741_F<br>LAG_J2 | BY4741_FL<br>AG_J3 | BY4741_F<br>LAG_J3 | BY4741_F<br>LAG_J3 | V5_Rtr1_<br>WT | V5_Rtr1_<br>WT | V5_Rtr1_<br>WT | TAP_Rtr1<br>_WT_1 | TAP_Rtr1<br>_WT_1 |
| 6320637   | TIF35   | 6                  | 14                 | 31.02              | 6                  | 14                 | 16.42              | 3                  | 12                 | 7.30           | 2              | 6              | 0                 | 0                 |
| 398364223 | NPR2    | 1                  | 1                  | 2.28               | 1                  | 1                  | 0                  | 0                  | 0                  | 0              | 0              | 0              | 0                 | 0                 |
| 6325390   | SPN1    | 8                  | 15                 | 24.88              | 8                  | 15                 | 3.66               | 1                  | 2                  | 3.66           | 2              | 3              | 3.41              | 1                 |
| 6324578   | DNL4    | 0                  | 0                  | 0                  | 0                  | 0                  | 0                  | 0                  | 0                  | 0              | 0              | 0              | 0                 | 0                 |
| 6319291   | FRT2    | 0                  | 0                  | 0                  | 0                  | 0                  | 0                  | 0                  | 0                  | 0              | 0              | 0              | 0                 | 0                 |
| 6322242   | HXT9    | 0                  | 0                  | 0                  | 0                  | 0                  | 0                  | 0                  | 0                  | 0              | 0              | 0              | 0                 | 0                 |
| 6322272   | RPL39   | 0                  | 0                  | 0                  | 0                  | 0                  | 0                  | 0                  | 0                  | 0              | 0              | 0              | 0                 | 0                 |
| 14318518  | VTC2    | 3                  | 4                  | 3.38               | 3                  | 4                  | 0                  | 0                  | 0                  | 1.09           | 1              | 5              | 0                 | 0                 |
| 330443752 | THI22   | 0                  | 0                  | 3.15               | 2                  | 8                  | 1.75               | 1                  | 1                  | 1.75           | 1              | 7              | 0                 | 0                 |
| 6325175   | MOT1    | 0                  | 0                  | 0                  | 0                  | 0                  | 0                  | 0                  | 0                  | 0              | 0              | 0              | 0                 | 0                 |
| 6322796   | DEF1    | 0                  | 0                  | 0                  | 0                  | 0                  | 0                  | 0                  | 0                  | 0              | 0              | 0              | 8.67              | 2                 |
| 398365059 | PTK2    | 0                  | 0                  | 0                  | 0                  | 0                  | 0                  | 0                  | 0                  | 0              | 0              | 0              | 0                 | 0                 |
| 6320345   | DOP1    | 3                  | 4                  | 1.83               | 3                  | 4                  | 0                  | 0                  | 0                  | 0              | 0              | 0              | 0                 | 0                 |
| 6323863   | HFA1    | 0                  | 0                  | 0                  | 0                  | 0                  | 0.42               | 1                  | 2                  | 0.52           | 1              | 18             | 0                 | 0                 |
| 6322948   | MLP1    | 6                  | 8                  | 4.16               | 6                  | 8                  | 4.16               | 5                  | 6                  | 0              | 0              | 0              | 0                 | 0                 |
| 6322999   | FRA1    | 1                  | 1                  | 1.74               | 1                  | 1                  | 1.47               | 1                  | 1                  | 1.07           | 1              | 1              | 0                 | 0                 |
| 6324491   | IRA2    | 1                  | 1                  | 0.49               | 1                  | 1                  | 0.23               | 1                  | 1                  | 0.36           | 1              | 1              | 0                 | 0                 |
| 6324215   | RPC19   | 0                  | 0                  | 0                  | 0                  | 0                  | 10.56              | 1                  | 1                  | 8.45           | 1              | 5              | 10.56             | 1                 |
| 6320419   | UPC2    | 0                  | 0                  | 0                  | 0                  | 0                  | 0                  | 0                  | 0                  | 0              | 0              | 0              | 0                 | 0                 |
| 398364627 | RDH54   | 2                  | 2                  | 2.30               | 2                  | 2                  | 0                  | 0                  | 0                  | 1.04           | 1              | 1              | 0                 | 0                 |
| 6321752   | VMR1    | 0                  | 0                  | 0                  | 0                  | 0                  | 0.50               | 1                  | 1                  | 0              | 0              | 0              | 0                 | 0                 |
| 6321793   | TIM10   | 0                  | 0                  | 0                  | 0                  | 0                  | 15.05              | 1                  | 1                  | 0              | 0              | 0              | 0                 | 0                 |
| 6322032   | BNR1    | 0                  | 0                  | 0                  | 0                  | 0                  | 0                  | 0                  | 0                  | 0              | 0              | 0              | 0                 | 0                 |
| 6325074   | RTT10   | 0                  | 0                  | 0                  | 0                  | 0                  | 0                  | 0                  | 0                  | 0              | 0              | 0              | 0                 | 0                 |
| 6325235   | RAD1    | 0                  | 0                  | 0                  | 0                  | 0                  | 0                  | 0                  | 0                  | 1.27           | 1              | 1              | 0                 | 0                 |
| 6323869   | CEF1    | 0                  | 0                  | 0                  | 0                  | 0                  | 0                  | 0                  | 0                  | 0              | 0              | 0              | 0                 | 0                 |
| 6323917   | TPS3    | 1                  | 2                  | 1.61               | 1                  | 2                  | 1.04               | 1                  | 1                  | 0              | 0              | 0              | 0                 | 0                 |
| 6321552   | SPT6    | 7                  | 10                 | 5.17               | 7                  | 10                 | 2.83               | 3                  | 4                  | 0.55           | 1              | 1              | 0                 | 0                 |
| 6320853   | BIM1    | 0                  | 0                  | 0                  | 0                  | 0                  | 0                  | 0                  | 0                  | 4.94           | 1              | 2              | 0                 | 0                 |
| 398364243 | YEL043W | 1                  | 3                  | 1.15               | 1                  | 3                  | 0                  | 0                  | 0                  | 0              | 0              | 0              | 0                 | 0                 |
| 6320027   | DLD1    | 0                  | 0                  | 0                  | 0                  | 0                  | 0                  | 0                  | 0                  | 0              | 0              | 0              | 0                 | 0                 |
| 6323356   | PEX30   | 1                  | 2                  | 3.44               | 1                  | 2                  | 0                  | 0                  | 0                  | 1.53           | 1              | 1              | 0                 | 0                 |
| 6320799   | ANP1    | 0                  | 0                  | 0                  | 0                  | 0                  | 0                  | 0                  | 0                  | 0              | 0              | 0              | 0                 | 0                 |
| 6324393   | YNR065C | 0                  | 0                  | 1.88               | 2                  | 2                  | 1.88               | 2                  | 2                  | 0              | 0              | 0              | 0                 | 0                 |
| 6323266   | THI7    | 0                  | 0                  | 0                  | 0                  | 0                  | 0                  | 0                  | 0                  | 0              | 0              | 0              | 0                 | 0                 |
| 6323445   | YLR413W | 1                  | 1                  | 1.93               | 1                  | 1                  | 0                  | 0                  | 0                  | 1.48           | 1              | 1              | 0                 | 0                 |
| 398364667 | THO2    | 0                  | 0                  | 0                  | 0                  | 0                  | 0.88               | 1                  | 2                  | 0              | 0              | 0              | 0                 | 0                 |

Table S1 - Smith-Kinnaman, *et al* (2014) Abbreviations: %SC = percent sequence coverage, UP = unique peptides, PSM = peptide spectrum matches

| Accession | Acronym  | UP                 | # PSM              | %SC                | UP                 | # PSM              | %SC                | UP                 | # PSM              | %SC            | UP             | # PSM          | %SC                | UP                 |
|-----------|----------|--------------------|--------------------|--------------------|--------------------|--------------------|--------------------|--------------------|--------------------|----------------|----------------|----------------|--------------------|--------------------|
|           |          | BY4741_F<br>LAG_J1 | BY4741_F<br>LAG_J1 | BY4741_FL<br>AG_J2 | BY4741_F<br>LAG_J2 | BY4741_F<br>LAG_J2 | BY4741_FL<br>AG_J3 | BY4741_F<br>LAG_J3 | BY4741_F<br>LAG_J3 | V5_Rtr1_<br>WT | V5_Rtr1_<br>WT | V5_Rtr1_<br>WT | TAP_Rtr1_<br>_WT_1 | TAP_Rtr1_<br>_WT_1 |
| 37362637  | JIP4     | 0                  | 0                  | 0                  | 0                  | 0                  | 1.03               | 1                  | 1                  | 0              | 0              | 0              | 0                  | 0                  |
| 398364707 | AAC3     | 0                  | 0                  | 7.49               | 2                  | 6                  | 3.58               | 1                  | 2                  | 0              | 0              | 0              | 3.58               | 1                  |
| 6322570   | YMR1     | 0                  | 0                  | 0                  | 0                  | 0                  | 0                  | 0                  | 0                  | 0              | 0              | 0              | 0                  | 0                  |
| 6324879   | ISW2     | 0                  | 0                  | 0                  | 0                  | 0                  | 0                  | 0                  | 0                  | 0              | 0              | 0              | 0                  | 0                  |
| 10383772  | LEU2     | 0                  | 0                  | 0                  | 0                  | 0                  | 0                  | 0                  | 0                  | 0              | 0              | 0              | 6.32               | 1                  |
| 6322079   | HOS4     | 0                  | 0                  | 0.65               | 1                  | 1                  | 0                  | 0                  | 0                  | 0              | 0              | 0              | 0                  | 0                  |
| 6321210   | VID30    | 1                  | 1                  | 1.46               | 1                  | 1                  | 0                  | 0                  | 0                  | 0.84           | 1              | 1              | 0                  | 0                  |
| 398365701 | YNR029C  | 1                  | 1                  | 2.80               | 1                  | 1                  | 0                  | 0                  | 0                  | 0              | 0              | 0              | 0                  | 0                  |
| 6320692   | VPS52    | 1                  | 1                  | 2.50               | 1                  | 1                  | 0                  | 0                  | 0                  | 0              | 0              | 0              | 0                  | 0                  |
| 398365525 | SMD1     | 0                  | 0                  | 0                  | 0                  | 0                  | 0                  | 0                  | 0                  | 0              | 0              | 0              | 0                  | 0                  |
| 6322086   | SLM1     | 1                  | 1                  | 1.75               | 1                  | 1                  | 0                  | 0                  | 0                  | 0              | 0              | 0              | 2.92               | 1                  |
| 398364897 | CBP6     | 4                  | 9                  | 21.60              | 4                  | 9                  | 27.78              | 6                  | 8                  | 0              | 0              | 0              | 6.79               | 1                  |
| 6323726   | NAM7     | 1                  | 1                  | 1.13               | 1                  | 1                  | 1.85               | 1                  | 1                  | 0              | 0              | 0              | 0                  | 0                  |
| 6324982   | SAM4     | 1                  | 1                  | 3.38               | 1                  | 1                  | 0                  | 0                  | 0                  | 0              | 0              | 0              | 0                  | 0                  |
| 6320324   | VBA4     | 0                  | 0                  | 0                  | 0                  | 0                  | 0                  | 0                  | 0                  | 0              | 0              | 0              | 0                  | 0                  |
| 6324612   | HIR2     | 0                  | 0                  | 0                  | 0                  | 0                  | 0                  | 0                  | 0                  | 0              | 0              | 0              | 0                  | 0                  |
| 6324981   | SAM3     | 0                  | 0                  | 0                  | 0                  | 0                  | 0                  | 0                  | 0                  | 0              | 0              | 0              | 0                  | 0                  |
| 6325379   | AXL1     | 0                  | 0                  | 0                  | 0                  | 0                  | 0                  | 0                  | 0                  | 0              | 0              | 0              | 0                  | 0                  |
| 6321020   | BRR2     | 0                  | 0                  | 0                  | 0                  | 0                  | 0                  | 0                  | 0                  | 0              | 0              | 0              | 0                  | 0                  |
| 6324694   | GCY1     | 0                  | 0                  | 0                  | 0                  | 0                  | 0                  | 0                  | 0                  | 0              | 0              | 0              | 0                  | 0                  |
| 6322312   | DAS1     | 0                  | 0                  | 0                  | 0                  | 0                  | 0                  | 0                  | 0                  | 0              | 0              | 0              | 0                  | 0                  |
| 398364625 | YKL033W- | 2                  | 2                  | 8.47               | 2                  | 2                  | 0                  | 0                  | 0                  | 3.39           | 1              | 1              | 0                  | 0                  |
| 6320034   | NRP1     | 1                  | 1                  | 1.67               | 1                  | 1                  | 0                  | 0                  | 0                  | 0              | 0              | 0              | 0                  | 0                  |
| 6325374   | YPR117W  | 0                  | 0                  | 0                  | 0                  | 0                  | 0                  | 0                  | 0                  | 0              | 0              | 0              | 0                  | 0                  |
| 6324546   | MDM38    | 0                  | 0                  | 0                  | 0                  | 0                  | 0                  | 0                  | 0                  | 1.75           | 1              | 1              | 3.14               | 1                  |
| 6323289   | LCB5     | 0                  | 0                  | 0                  | 0                  | 0                  | 0                  | 0                  | 0                  | 0              | 0              | 0              | 0                  | 0                  |
| 6321205   | TAN1     | 0                  | 0                  | 0                  | 0                  | 0                  | 6.57               | 1                  | 2                  | 0              | 0              | 0              | 0                  | 0                  |
| 6319351   | PHO11    | 0                  | 0                  | 0                  | 0                  | 0                  | 0                  | 0                  | 0                  | 0              | 0              | 0              | 0                  | 0                  |
| 6319523   | REB1     | 1                  | 1                  | 1.23               | 1                  | 1                  | 3.46               | 2                  | 5                  | 1.60           | 1              | 1              | 0                  | 0                  |
| 6320921   | YER077C  | 1                  | 1                  | 1.02               | 1                  | 1                  | 0                  | 0                  | 0                  | 0              | 0              | 0              | 0                  | 0                  |
| 6320826   | GLC3     | 0                  | 0                  | 0                  | 0                  | 0                  | 0                  | 0                  | 0                  | 0              | 0              | 0              | 0                  | 0                  |
| 398365141 | INP53    | 1                  | 1                  | 0.99               | 1                  | 1                  | 0.72               | 1                  | 1                  | 0              | 0              | 0              | 0                  | 0                  |
| 398366583 | SIP1     | 1                  | 1                  | 1.47               | 1                  | 1                  | 0                  | 0                  | 0                  | 0              | 0              | 0              | 0                  | 0                  |
| 398364669 | MAD3     | 0                  | 0                  | 0                  | 0                  | 0                  | 0                  | 0                  | 0                  | 0              | 0              | 0              | 0                  | 0                  |
| 6322700   | DBR1     | 0                  | 0                  | 0                  | 0                  | 0                  | 0                  | 0                  | 0                  | 0              | 0              | 0              | 0                  | 0                  |
| 6323317   | YLR287C  | 0                  | 0                  | 0                  | 0                  | 0                  | 0                  | 0                  | 0                  | 0              | 0              | 0              | 0                  | 0                  |
| 398365819 | SAN1     | 1                  | 3                  | 3.28               | 1                  | 3                  | 1.48               | 1                  | 1                  | 2.95           | 1              | 1              | 0                  | 0                  |



Table S1 - Smith-Kinnaman, *et al* (2014) Abbreviations: %SC = percent sequence coverage, UP = unique peptides, PSM = peptide spectrum matches

| Accession | Acronym  | UP                 | # PSM              | %SC                | UP                 | # PSM              | %SC                | UP                 | # PSM              | %SC            | UP             | # PSM          | %SC               | UP                |
|-----------|----------|--------------------|--------------------|--------------------|--------------------|--------------------|--------------------|--------------------|--------------------|----------------|----------------|----------------|-------------------|-------------------|
|           |          | BY4741_F<br>LAG_J1 | BY4741_F<br>LAG_J1 | BY4741_FL<br>AG_J2 | BY4741_F<br>LAG_J2 | BY4741_F<br>LAG_J2 | BY4741_FL<br>AG_J3 | BY4741_F<br>LAG_J3 | BY4741_F<br>LAG_J3 | V5_Rtr1_<br>WT | V5_Rtr1_<br>WT | V5_Rtr1_<br>WT | TAP_Rtr1<br>_WT_1 | TAP_Rtr1<br>_WT_1 |
| 398365335 | YNL033W  | 0                  | 0                  | 0                  | 0                  | 0                  | 0                  | 0                  | 0                  | 0              | 0              | 0              | 0                 | 0                 |
| 33438893  | YPL119C- | 0                  | 0                  | 0                  | 0                  | 0                  | 0                  | 0                  | 0                  | 0              | 0              | 0              | 0                 | 0                 |
| 6322579   | JHD2     | 0                  | 0                  | 0                  | 0                  | 0                  | 0                  | 0                  | 0                  | 0              | 0              | 0              | 0                 | 0                 |
| 6324141   | KAR1     | 0                  | 0                  | 0                  | 0                  | 0                  | 0                  | 0                  | 0                  | 0              | 0              | 0              | 0                 | 0                 |
| 10383756  | LRE1     | 0                  | 0                  | 0                  | 0                  | 0                  | 0                  | 0                  | 0                  | 0              | 0              | 0              | 0                 | 0                 |
| 398364917 | NHP10    | 0                  | 0                  | 0                  | 0                  | 0                  | 0                  | 0                  | 0                  | 0              | 0              | 0              | 0                 | 0                 |
| 6323035   | NSE1     | 0                  | 0                  | 0                  | 0                  | 0                  | 0                  | 0                  | 0                  | 0              | 0              | 0              | 0                 | 0                 |
| 50593425  | OMA1     | 0                  | 0                  | 0                  | 0                  | 0                  | 0                  | 0                  | 0                  | 0              | 0              | 0              | 0                 | 0                 |
| 6321910   | ORC6     | 0                  | 0                  | 0                  | 0                  | 0                  | 0                  | 0                  | 0                  | 0              | 0              | 0              | 0                 | 0                 |
| 6322494   | PET191   | 0                  | 0                  | 0                  | 0                  | 0                  | 0                  | 0                  | 0                  | 0              | 0              | 0              | 0                 | 0                 |
| 398365057 | SPO14    | 0                  | 0                  | 0                  | 0                  | 0                  | 0                  | 0                  | 0                  | 0              | 0              | 0              | 0                 | 0                 |
| 398364971 | TRP1     | 0                  | 0                  | 0                  | 0                  | 0                  | 0                  | 0                  | 0                  | 0              | 0              | 0              | 0                 | 0                 |
| 398365003 | PSF1     | 0                  | 0                  | 0                  | 0                  | 0                  | 0                  | 0                  | 0                  | 0              | 0              | 0              | 0                 | 0                 |
| 6321697   | RAD2     | 0                  | 0                  | 0                  | 0                  | 0                  | 0                  | 0                  | 0                  | 0              | 0              | 0              | 0                 | 0                 |
| 6319525   | REG2     | 0                  | 0                  | 0                  | 0                  | 0                  | 0                  | 0                  | 0                  | 0              | 0              | 0              | 0                 | 0                 |
| 6320271   | RTR2     | 0                  | 0                  | 0                  | 0                  | 0                  | 0                  | 0                  | 0                  | 0              | 0              | 0              | 0                 | 0                 |
| 6324162   | SKO1     | 0                  | 0                  | 0                  | 0                  | 0                  | 0                  | 0                  | 0                  | 0              | 0              | 0              | 0                 | 0                 |
| 398366633 | SNM1     | 0                  | 0                  | 0                  | 0                  | 0                  | 0                  | 0                  | 0                  | 0              | 0              | 0              | 0                 | 0                 |
| 6322778   | STB6     | 0                  | 0                  | 0                  | 0                  | 0                  | 0                  | 0                  | 0                  | 0              | 0              | 0              | 0                 | 0                 |
| 6325081   | TRE1     | 0                  | 0                  | 0                  | 0                  | 0                  | 0                  | 0                  | 0                  | 0              | 0              | 0              | 0                 | 0                 |
| 6324447   | TRM13    | 0                  | 0                  | 0                  | 0                  | 0                  | 0                  | 0                  | 0                  | 0              | 0              | 0              | 0                 | 0                 |
| 6323236   | HRD3     | 0                  | 0                  | 0                  | 0                  | 0                  | 0                  | 0                  | 0                  | 0              | 0              | 0              | 0                 | 0                 |
| 6325184   | UBP16    | 0                  | 0                  | 0                  | 0                  | 0                  | 0                  | 0                  | 0                  | 0              | 0              | 0              | 0                 | 0                 |
| 398364885 | UBP5     | 0                  | 0                  | 0                  | 0                  | 0                  | 0                  | 0                  | 0                  | 0              | 0              | 0              | 0                 | 0                 |
| 6325071   | UIP4     | 0                  | 0                  | 0                  | 0                  | 0                  | 0                  | 0                  | 0                  | 0              | 0              | 0              | 0                 | 0                 |
| 398365127 | UIP5     | 0                  | 0                  | 0                  | 0                  | 0                  | 0                  | 0                  | 0                  | 0              | 0              | 0              | 0                 | 0                 |
| 6319904   | YIH1     | 0                  | 0                  | 0                  | 0                  | 0                  | 0                  | 0                  | 0                  | 0              | 0              | 0              | 0                 | 0                 |
| 6325266   | SUT2     | 0                  | 0                  | 0                  | 0                  | 0                  | 0                  | 0                  | 0                  | 7.46           | 1              | 1              | 0                 | 0                 |
| 6324449   | HRP1     | 1                  | 1                  | 3.18               | 1                  | 1                  | 7.12               | 3                  | 8                  | 1.50           | 1              | 3              | 2.43              | 1                 |
| 6323278   | YEF3     | 36                 | 340                | 43.68              | 36                 | 340                | 29.50              | 26                 | 113                | 15.13          | 18             | 452            | 5.94              | 5                 |
| 6322084   | PFK26    | 28                 | 347                | 37.85              | 28                 | 347                | 28.66              | 18                 | 54                 | 1.21           | 1              | 2              | 0                 | 0                 |
| 6323057   | RPL15A   | 5                  | 18                 | 25.49              | 5                  | 18                 | 36.27              | 7                  | 179                | 15.20          | 4              | 413            | 6.86              | 1                 |
| 6323769   | RPL15B   | 5                  | 12                 | 25.49              | 5                  | 12                 | 31.37              | 6                  | 162                | 15.20          | 4              | 347            | 6.86              | 1                 |
| 6319282   | FUN12    | 2                  | 2                  | 3.09               | 2                  | 2                  | 4.89               | 4                  | 4                  | 3.19           | 2              | 9              | 0                 | 0                 |
| 6320190   | NOP1     | 9                  | 25                 | 35.17              | 9                  | 25                 | 6.42               | 2                  | 7                  | 11.31          | 5              | 16             | 4.89              | 1                 |
| 6323654   | CLU1     | 16                 | 31                 | 16.60              | 16                 | 31                 | 0.70               | 1                  | 1                  | 5.95           | 7              | 20             | 0                 | 0                 |
| 6324886   | NOP58    | 8                  | 17                 | 20.74              | 8                  | 17                 | 21.33              | 8                  | 21                 | 8.22           | 3              | 11             | 0                 | 0                 |

Table S1 - Smith-Kinnaman, *et al* (2014) Abbreviations: %SC = percent sequence coverage, UP = unique peptides, PSM = peptide spectrum matches

| Accession | Acronym | UP                 | # PSM              | %SC                | UP                 | # PSM              | %SC                | UP                 | # PSM              | %SC            | UP             | # PSM          | %SC               | UP                |
|-----------|---------|--------------------|--------------------|--------------------|--------------------|--------------------|--------------------|--------------------|--------------------|----------------|----------------|----------------|-------------------|-------------------|
|           |         | BY4741_F<br>LAG_J1 | BY4741_F<br>LAG_J1 | BY4741_FL<br>AG_J2 | BY4741_F<br>LAG_J2 | BY4741_F<br>LAG_J2 | BY4741_FL<br>AG_J3 | BY4741_F<br>LAG_J3 | BY4741_F<br>LAG_J3 | V5_Rtr1_<br>WT | V5_Rtr1_<br>WT | V5_Rtr1_<br>WT | TAP_Rtr1<br>_WT_1 | TAP_Rtr1<br>_WT_1 |
| 6323226   | NOP56   | 9                  | 15                 | 23.21              | 9                  | 15                 | 22.22              | 10                 | 14                 | 4.37           | 2              | 18             | 0                 | 0                 |
| 37362658  | SSZ1    | 13                 | 54                 | 35.50              | 13                 | 54                 | 36.06              | 15                 | 41                 | 7.06           | 4              | 51             | 7.43              | 2                 |
| 6324452   | RPL18A  | 4                  | 49                 | 24.19              | 4                  | 49                 | 27.96              | 5                  | 98                 | 30.65          | 6              | 380            | 6.99              | 1                 |
| 398366653 | LCD1    | 16                 | 43                 | 26.37              | 16                 | 43                 | 19.68              | 12                 | 41                 | 0              | 0              | 0              | 0                 | 0                 |
| 6322313   | RPA34   | 7                  | 45                 | 37.34              | 7                  | 45                 | 43.35              | 11                 | 215                | 0              | 0              | 0              | 0                 | 0                 |
| 398364437 | RPL1B   | 9                  | 85                 | 38.25              | 9                  | 85                 | 38.71              | 10                 | 111                | 7.37           | 2              | 35             | 0                 | 0                 |
| 6321968   | ENO2    | 14                 | 178                | 42.11              | 14                 | 178                | 48.97              | 17                 | 272                | 13.73          | 6              | 88             | 41.65             | 11                |
| 398365729 | DED1    | 21                 | 115                | 43.71              | 21                 | 115                | 28.81              | 15                 | 52                 | 8.11           | 6              | 60             | 35.60             | 14                |
| 6323566   | FPR3    | 2                  | 6                  | 6.81               | 2                  | 6                  | 6.81               | 2                  | 2                  | 5.11           | 2              | 4              | 0                 | 0                 |
| 398366315 | ENO1    | 10                 | 95                 | 29.52              | 10                 | 95                 | 34.32              | 11                 | 140                | 13.73          | 6              | 88             | 23.11             | 6                 |
| 10383781  | PGK1    | 16                 | 45                 | 48.08              | 16                 | 45                 | 45.67              | 16                 | 47                 | 3.85           | 2              | 30             | 38.22             | 10                |
| 6321874   | KSP1    | 6                  | 12                 | 7.68               | 6                  | 12                 | 0                  | 0                  | 0                  | 0              | 0              | 0              | 0                 | 0                 |
| 6321531   | VAS1    | 31                 | 74                 | 33.42              | 31                 | 74                 | 23.73              | 22                 | 57                 | 3.89           | 4              | 16             | 0                 | 0                 |
| 6322769   | TEF4    | 9                  | 71                 | 27.43              | 9                  | 71                 | 19.17              | 8                  | 31                 | 11.89          | 5              | 30             | 8.01              | 2                 |
| 398366187 | HTA1    | 1                  | 4                  | 6.82               | 1                  | 4                  | 12.12              | 2                  | 12                 | 5.30           | 1              | 18             | 12.12             | 2                 |
| 330443451 | GRS1    | 27                 | 206                | 45.73              | 27                 | 206                | 44.98              | 25                 | 136                | 19.49          | 16             | 261            | 6.15              | 3                 |
| 6321203   | ADE5,7  | 12                 | 31                 | 19.58              | 12                 | 31                 | 20.07              | 11                 | 14                 | 4.24           | 4              | 16             | 2.24              | 1                 |
| 6324486   | ADH1    | 14                 | 654                | 47.99              | 14                 | 654                | 55.75              | 19                 | 463                | 13.79          | 5              | 143            | 13.79             | 4                 |
| 6323371   | RPP0    | 9                  | 100                | 33.33              | 9                  | 100                | 31.73              | 8                  | 113                | 8.65           | 3              | 114            | 3.53              | 1                 |
| 6323886   | RPS10B  | 1                  | 1                  | 17.14              | 1                  | 1                  | 38.10              | 3                  | 51                 | 20.95          | 3              | 5              | 0                 | 0                 |
| 6320009   | ARF1    | 8                  | 735                | 56.35              | 8                  | 735                | 56.35              | 8                  | 336                | 12.71          | 2              | 100            | 27.62             | 4                 |
| 6321429   | LEU1    | 23                 | 320                | 35.82              | 23                 | 320                | 39.41              | 22                 | 122                | 2.82           | 2              | 19             | 0                 | 0                 |
| 6323204   | CBF5    | 2                  | 4                  | 6.42               | 2                  | 4                  | 0                  | 0                  | 0                  | 4.97           | 2              | 4              | 0                 | 0                 |
| 6320064   | ARF2    | 8                  | 326                | 56.35              | 8                  | 326                | 56.35              | 8                  | 129                | 12.71          | 2              | 100            | 14.36             | 2                 |
| 6321265   | XRN1    | 14                 | 21                 | 11.58              | 14                 | 21                 | 2.75               | 3                  | 5                  | 0              | 0              | 0              | 0                 | 0                 |
| 6323904   | RKR1    | 24                 | 63                 | 19.53              | 24                 | 63                 | 1.02               | 1                  | 1                  | 0              | 0              | 0              | 0                 | 0                 |
| 6322790   | FBA1    | 8                  | 60                 | 36.21              | 8                  | 60                 | 31.75              | 7                  | 80                 | 6.13           | 2              | 36             | 9.47              | 2                 |
| 6324562   | HTZ1    | 2                  | 13                 | 14.18              | 2                  | 13                 | 22.39              | 3                  | 11                 | 12.69          | 2              | 27             | 29.85             | 4                 |
| 6321231   | SPT16   | 5                  | 10                 | 5.60               | 5                  | 10                 | 4.93               | 4                  | 5                  | 0.97           | 1              | 1              | 0                 | 0                 |
| 398365455 | TEF3    | 10                 | 61                 | 10.44              | 10                 | 61                 | 6.80               | 6                  | 16                 | 9.39           | 10             | 100            | 1.05              | 1                 |
| 398366333 | FPR4    | 0                  | 0                  | 4.34               | 1                  | 2                  | 9.18               | 3                  | 5                  | 0              | 0              | 0              | 0                 | 0                 |
| 398364607 | DBP3    | 1                  | 1                  | 2.29               | 1                  | 1                  | 4.40               | 2                  | 2                  | 2.10           | 2              | 6              | 0                 | 0                 |
| 6324534   | RPP2A   | 5                  | 76                 | 79.25              | 5                  | 76                 | 79.25              | 5                  | 85                 | 11.32          | 1              | 26             | 28.30             | 2                 |
| 6321430   | PMA1    | 16                 | 71                 | 20.26              | 16                 | 71                 | 24.51              | 20                 | 84                 | 10.89          | 11             | 303            | 1.63              | 1                 |
| 398364809 | DBP2    | 14                 | 66                 | 28.39              | 14                 | 66                 | 9.16               | 4                  | 16                 | 0              | 0              | 0              | 7.14              | 3                 |
| 6319668   | RPL21A  | 5                  | 19                 | 22.50              | 5                  | 19                 | 26.25              | 6                  | 32                 | 26.25          | 6              | 462            | 11.88             | 2                 |
| 6323981   | FET4    | 6                  | 13                 | 13.22              | 6                  | 13                 | 8.33               | 2                  | 4                  | 0              | 0              | 0              | 0                 | 0                 |



Table S1 - Smith-Kinnaman, *et al* (2014) Abbreviations: %SC = percent sequence coverage, UP = unique peptides, PSM = peptide spectrum matches

| Accession | Acronym | UP                 | # PSM              | %SC                | UP                 | # PSM              | %SC                | UP                 | # PSM              | %SC            | UP             | # PSM          | %SC               | UP                |
|-----------|---------|--------------------|--------------------|--------------------|--------------------|--------------------|--------------------|--------------------|--------------------|----------------|----------------|----------------|-------------------|-------------------|
|           |         | BY4741_F<br>LAG_J1 | BY4741_F<br>LAG_J1 | BY4741_FL<br>AG_J2 | BY4741_F<br>LAG_J2 | BY4741_F<br>LAG_J2 | BY4741_FL<br>AG_J3 | BY4741_F<br>LAG_J3 | BY4741_F<br>LAG_J3 | V5_Rtr1_<br>WT | V5_Rtr1_<br>WT | V5_Rtr1_<br>WT | TAP_Rtr1<br>_WT_1 | TAP_Rtr1<br>_WT_1 |
| 6321807   | DED81   | 15                 | 54                 | 33.57              | 15                 | 54                 | 36.82              | 16                 | 65                 | 9.75           | 5              | 11             | 2.17              | 1                 |
| 398364767 | SUI2    | 4                  | 9                  | 18.75              | 4                  | 9                  | 9.87               | 2                  | 5                  | 9.54           | 3              | 25             | 0                 | 0                 |
| 6323011   | DPS1    | 16                 | 55                 | 35.01              | 16                 | 55                 | 42.37              | 21                 | 70                 | 7.18           | 4              | 41             | 6.28              | 3                 |
| 6323885   | RRP5    | 12                 | 16                 | 8.62               | 12                 | 16                 | 3.64               | 6                  | 8                  | 2.14           | 3              | 4              | 0.69              | 1                 |
| 398366547 | RPP2B   | 6                  | 80                 | 81.82              | 6                  | 80                 | 86.36              | 7                  | 111                | 12.73          | 1              | 11             | 22.73             | 2                 |
| 6323288   | HSP60   | 22                 | 82                 | 44.76              | 22                 | 82                 | 52.80              | 26                 | 155                | 8.22           | 4              | 40             | 31.82             | 14                |
| 6321599   | NSR1    | 4                  | 7                  | 13.04              | 4                  | 7                  | 13.04              | 4                  | 7                  | 7.97           | 3              | 14             | 0                 | 0                 |
| 6320863   | GCD11   | 6                  | 14                 | 16.70              | 6                  | 14                 | 22.20              | 9                  | 19                 | 6.83           | 3              | 5              | 0                 | 0                 |
| 398366591 | NPL3    | 9                  | 88                 | 27.05              | 9                  | 88                 | 13.77              | 4                  | 40                 | 0              | 0              | 0              | 11.84             | 3                 |
| 6319483   | IPP1    | 3                  | 4                  | 9.76               | 3                  | 4                  | 10.45              | 2                  | 4                  | 0              | 0              | 0              | 0                 | 0                 |
| 6325221   | PMA2    | 0                  | 0                  | 14.15              | 12                 | 55                 | 18.27              | 15                 | 68                 | 8.24           | 8              | 288            | 1.58              | 1                 |
| 6322745   | GFA1    | 17                 | 74                 | 32.50              | 17                 | 74                 | 19.39              | 10                 | 26                 | 2.37           | 2              | 38             | 2.93              | 1                 |
| 398364525 | LSG1    | 2                  | 3                  | 3.91               | 2                  | 3                  | 12.03              | 6                  | 16                 | 0              | 0              | 0              | 0                 | 0                 |
| 6325038   | SAR1    | 7                  | 50                 | 46.32              | 7                  | 50                 | 24.74              | 4                  | 15                 | 11.05          | 2              | 21             | 0                 | 0                 |
| 6323840   | HSC82   | 30                 | 257                | 41.28              | 30                 | 257                | 42.13              | 34                 | 374                | 11.63          | 8              | 55             | 21.13             | 11                |
| 6321881   | GAR1    | 2                  | 9                  | 14.15              | 2                  | 9                  | 6.34               | 1                  | 5                  | 0              | 0              | 0              | 0                 | 0                 |
| 6320164   | NAT1    | 4                  | 4                  | 5.62               | 4                  | 4                  | 3.40               | 2                  | 2                  | 0              | 0              | 0              | 0                 | 0                 |
| 398366403 | RPS12   | 4                  | 26                 | 29.37              | 4                  | 26                 | 33.57              | 5                  | 34                 | 23.08          | 3              | 162            | 6.99              | 1                 |
| 6322830   | CDC16   | 18                 | 92                 | 24.52              | 18                 | 92                 | 14.40              | 11                 | 30                 | 0              | 0              | 0              | 0                 | 0                 |
| 330443397 | ATP1    | 18                 | 193                | 37.25              | 18                 | 193                | 43.30              | 22                 | 165                | 11.38          | 8              | 215            | 17.80             | 8                 |
| 6324709   | IDH2    | 4                  | 6                  | 14.91              | 4                  | 6                  | 9.76               | 2                  | 2                  | 5.42           | 2              | 8              | 2.98              | 1                 |
| 6325178   | RPL21B  | 0                  | 0                  | 22.50              | 5                  | 19                 | 26.25              | 6                  | 32                 | 33.13          | 7              | 474            | 11.88             | 2                 |
| 6321903   | UBA4    | 14                 | 116                | 28.86              | 14                 | 116                | 31.82              | 13                 | 37                 | 0              | 0              | 0              | 0                 | 0                 |
| 6325138   | DBP1    | 0                  | 0                  | 8.10               | 5                  | 31                 | 8.10               | 5                  | 16                 | 2.59           | 2              | 15             | 8.43              | 4                 |
| 6325248   | TAE2    | 3                  | 3                  | 3.18               | 3                  | 3                  | 0                  | 0                  | 0                  | 0              | 0              | 0              | 0                 | 0                 |
| 330443505 | DBP10   | 1                  | 1                  | 1.31               | 1                  | 1                  | 0                  | 0                  | 0                  | 0              | 0              | 0              | 0                 | 0                 |
| 6320148   | PSA1    | 10                 | 132                | 42.66              | 10                 | 132                | 27.42              | 7                  | 51                 | 0              | 0              | 0              | 8.31              | 2                 |
| 6325016   | HSP82   | 29                 | 236                | 42.60              | 29                 | 236                | 38.79              | 29                 | 337                | 11.42          | 8              | 55             | 21.02             | 11                |
| 6320874   | ARB1    | 9                  | 22                 | 19.84              | 9                  | 22                 | 9.84               | 4                  | 14                 | 11.31          | 6              | 35             | 0                 | 0                 |
| 6319673   | PGI1    | 3                  | 4                  | 7.04               | 3                  | 4                  | 1.81               | 1                  | 2                  | 0              | 0              | 0              | 2.71              | 1                 |
| 398365251 | GSC2    | 18                 | 49                 | 11.50              | 18                 | 49                 | 3.69               | 7                  | 13                 | 1.21           | 1              | 3              | 0                 | 0                 |
| 6325018   | SUI3    | 8                  | 19                 | 33.68              | 8                  | 19                 | 23.16              | 5                  | 18                 | 3.51           | 2              | 3              | 8.42              | 1                 |
| 6323374   | FKS1    | 26                 | 81                 | 18.28              | 26                 | 81                 | 8.00               | 11                 | 24                 | 1.23           | 1              | 2              | 0                 | 0                 |
| 14318479  | ACT1    | 11                 | 77                 | 37.33              | 11                 | 77                 | 49.87              | 13                 | 139                | 20.27          | 7              | 165            | 13.33             | 3                 |
| 6323554   | TUB1    | 9                  | 84                 | 26.85              | 9                  | 84                 | 23.49              | 8                  | 60                 | 5.37           | 2              | 4              | 10.96             | 3                 |
| 6321724   | ZUO1    | 9                  | 22                 | 30.95              | 9                  | 22                 | 27.02              | 8                  | 19                 | 8.55           | 5              | 29             | 3.70              | 1                 |
| 6320842   | NUG1    | 8                  | 14                 | 21.15              | 8                  | 14                 | 13.65              | 5                  | 5                  | 4.42           | 3              | 7              | 0                 | 0                 |

Table S1 - Smith-Kinnaman, *et al* (2014) Abbreviations: %SC = percent sequence coverage, UP = unique peptides, PSM = peptide spectrum matches

| Accession | Acronym | UP                 | # PSM              | %SC                | UP                 | # PSM              | %SC                | UP                 | # PSM              | %SC            | UP             | # PSM          | %SC                | UP                 |
|-----------|---------|--------------------|--------------------|--------------------|--------------------|--------------------|--------------------|--------------------|--------------------|----------------|----------------|----------------|--------------------|--------------------|
|           |         | BY4741_F<br>LAG_J1 | BY4741_F<br>LAG_J1 | BY4741_FL<br>AG_J2 | BY4741_F<br>LAG_J2 | BY4741_F<br>LAG_J2 | BY4741_FL<br>AG_J3 | BY4741_F<br>LAG_J3 | BY4741_F<br>LAG_J3 | V5_Rtr1_<br>WT | V5_Rtr1_<br>WT | V5_Rtr1_<br>WT | TAP_Rtr1_<br>_WT_1 | TAP_Rtr1_<br>_WT_1 |
| 6322652   | YKT6    | 6                  | 11                 | 32.00              | 6                  | 11                 | 13.00              | 3                  | 4                  | 13.00          | 2              | 10             | 7.00               | 1                  |
| 6321706   | FOL2    | 6                  | 6                  | 27.16              | 6                  | 6                  | 24.28              | 5                  | 6                  | 0              | 0              | 0              | 0                  | 0                  |
| 6319546   | HSP26   | 4                  | 7                  | 27.10              | 4                  | 7                  | 15.89              | 2                  | 5                  | 8.88           | 2              | 5              | 27.10              | 5                  |
| 398364355 | RPL29   | 1                  | 2                  | 15.25              | 1                  | 2                  | 13.56              | 1                  | 3                  | 13.56          | 1              | 2              | 13.56              | 1                  |
| 398365973 | TIF4631 | 2                  | 2                  | 2.21               | 2                  | 2                  | 1.26               | 1                  | 1                  | 5.57           | 5              | 9              | 4.31               | 2                  |
| 6321929   | ARO9    | 1                  | 1                  | 1.95               | 1                  | 1                  | 0                  | 0                  | 0                  | 0              | 0              | 0              | 0                  | 0                  |
| 6321808   | YHR020W | 19                 | 138                | 35.76              | 19                 | 138                | 31.98              | 17                 | 70                 | 7.85           | 5              | 55             | 7.41               | 3                  |
| 6323729   | ADH3    | 4                  | 21                 | 9.33               | 4                  | 21                 | 11.47              | 4                  | 6                  | 1.87           | 1              | 1              | 0                  | 0                  |
| 6319395   | ILS1    | 13                 | 26                 | 15.11              | 13                 | 26                 | 16.51              | 13                 | 29                 | 2.33           | 2              | 14             | 1.31               | 1                  |
| 6323969   | NIP1    | 6                  | 7                  | 8.99               | 6                  | 7                  | 8.87               | 5                  | 6                  | 3.94           | 3              | 6              | 3.57               | 2                  |
| 6322666   | FAS1    | 27                 | 53                 | 16.53              | 27                 | 53                 | 14.19              | 21                 | 42                 | 2.63           | 6              | 27             | 2.83               | 4                  |
| 6323568   | TCB3    | 6                  | 9                  | 5.05               | 6                  | 9                  | 2.27               | 2                  | 4                  | 0.84           | 1              | 1              | 0                  | 0                  |
| 398366505 | HXT7    | 1                  | 1                  | 2.46               | 1                  | 1                  | 0                  | 0                  | 0                  | 0              | 0              | 0              | 0                  | 0                  |
| 6322289   | CPS1    | 3                  | 4                  | 5.73               | 3                  | 4                  | 3.65               | 2                  | 2                  | 0              | 0              | 0              | 0                  | 0                  |
| 398366285 | ALA1    | 18                 | 39                 | 23.59              | 18                 | 39                 | 25.37              | 18                 | 55                 | 3.24           | 3              | 4              | 4.07               | 3                  |
| 6319553   | RPG1    | 8                  | 14                 | 11.00              | 8                  | 14                 | 5.71               | 3                  | 4                  | 10.37          | 8              | 38             | 4.36               | 3                  |
| 6325298   | TIF5    | 9                  | 16                 | 24.20              | 9                  | 16                 | 32.59              | 11                 | 31                 | 5.19           | 2              | 22             | 0                  | 0                  |
| 398366229 | FAA1    | 12                 | 35                 | 23.14              | 12                 | 35                 | 9.29               | 4                  | 5                  | 4.14           | 4              | 40             | 0                  | 0                  |
| 6323613   | TSA1    | 4                  | 30                 | 23.98              | 4                  | 30                 | 34.18              | 7                  | 71                 | 0              | 0              | 0              | 20.41              | 3                  |
| 6323183   | RNH203  | 7                  | 113                | 82.73              | 7                  | 113                | 82.73              | 9                  | 347                | 0              | 0              | 0              | 0                  | 0                  |
| 6320359   | CPR1    | 0                  | 0                  | 0                  | 0                  | 0                  | 20.37              | 2                  | 7                  | 8.02           | 1              | 7              | 0                  | 0                  |
| 6321236   | ARO8    | 5                  | 9                  | 14.20              | 5                  | 9                  | 19.00              | 6                  | 9                  | 0              | 0              | 0              | 0                  | 0                  |
| 6323861   | PFK2    | 18                 | 50                 | 25.13              | 18                 | 50                 | 19.50              | 13                 | 35                 | 5.01           | 5              | 17             | 14.91              | 9                  |
| 398365253 | TIF1    | 17                 | 138                | 50.63              | 17                 | 138                | 50.89              | 18                 | 146                | 9.62           | 4              | 67             | 19.24              | 6                  |
| 6323511   | TUB3    | 6                  | 64                 | 18.65              | 6                  | 64                 | 19.10              | 6                  | 48                 | 3.82           | 2              | 2              | 8.09               | 2                  |
| 37362625  | SRO9    | 6                  | 10                 | 20.97              | 6                  | 10                 | 20.51              | 5                  | 9                  | 3.92           | 1              | 2              | 4.61               | 1                  |
| 398365115 | BMH1    | 8                  | 23                 | 26.97              | 8                  | 23                 | 41.57              | 8                  | 27                 | 5.24           | 1              | 7              | 10.11              | 2                  |
| 398366063 | TYS1    | 5                  | 13                 | 15.23              | 5                  | 13                 | 12.18              | 5                  | 10                 | 2.03           | 1              | 5              | 0                  | 0                  |
| 6323002   | HSP104  | 31                 | 97                 | 38.99              | 31                 | 97                 | 16.30              | 11                 | 23                 | 10.90          | 10             | 34             | 2.09               | 1                  |
| 6324902   | MYO2    | 9                  | 9                  | 6.48               | 9                  | 9                  | 0                  | 0                  | 0                  | 2.10           | 2              | 2              | 0                  | 0                  |
| 6323947   | HAS1    | 4                  | 6                  | 9.11               | 4                  | 6                  | 4.95               | 2                  | 2                  | 1.98           | 1              | 2              | 0                  | 0                  |
| 6320376   | HSP42   | 0                  | 0                  | 0                  | 0                  | 0                  | 0                  | 0                  | 0                  | 2.93           | 1              | 10             | 0                  | 0                  |
| 398364255 | HYP2    | 4                  | 21                 | 37.58              | 4                  | 21                 | 22.93              | 3                  | 15                 | 0              | 0              | 0              | 0                  | 0                  |
| 6320809   | SNU13   | 2                  | 5                  | 13.49              | 2                  | 5                  | 30.95              | 3                  | 4                  | 5.56           | 1              | 1              | 0                  | 0                  |
| 6323021   | DRS1    | 2                  | 2                  | 3.19               | 2                  | 2                  | 0                  | 0                  | 0                  | 0              | 0              | 0              | 0                  | 0                  |
| 398366329 | PYK2    | 0                  | 0                  | 1.98               | 1                  | 10                 | 1.98               | 1                  | 5                  | 0              | 0              | 0              | 1.98               | 1                  |
| 398365741 | NOC2    | 1                  | 1                  | 1.41               | 1                  | 1                  | 0.99               | 1                  | 1                  | 0              | 0              | 0              | 0                  | 0                  |

Table S1 - Smith-Kinnaman, *et al* (2014) Abbreviations: %SC = percent sequence coverage, UP = unique peptides, PSM = peptide spectrum matches

| Accession | Acronym | UP                 | # PSM              | %SC                | UP                 | # PSM              | %SC                | UP                 | # PSM              | %SC            | UP             | # PSM          | %SC               | UP                |
|-----------|---------|--------------------|--------------------|--------------------|--------------------|--------------------|--------------------|--------------------|--------------------|----------------|----------------|----------------|-------------------|-------------------|
|           |         | BY4741_F<br>LAG_J1 | BY4741_F<br>LAG_J1 | BY4741_FL<br>AG_J2 | BY4741_F<br>LAG_J2 | BY4741_F<br>LAG_J2 | BY4741_FL<br>AG_J3 | BY4741_F<br>LAG_J3 | BY4741_F<br>LAG_J3 | V5_Rtr1_<br>WT | V5_Rtr1_<br>WT | V5_Rtr1_<br>WT | TAP_Rtr1<br>_WT_1 | TAP_Rtr1<br>_WT_1 |
| 6321027   | DMC1    | 0                  | 0                  | 0                  | 0                  | 0                  | 0                  | 0                  | 0                  | 0              | 0              | 0              | 0                 | 0                 |
| 398364483 | HOR2    | 0                  | 0                  | 13.60              | 3                  | 6                  | 10.80              | 3                  | 14                 | 3.60           | 1              | 14             | 10.80             | 3                 |
| 398365429 | PDR5    | 13                 | 26                 | 11.25              | 13                 | 26                 | 5.29               | 6                  | 7                  | 1.79           | 2              | 9              | 1.13              | 1                 |
| 6325245   | RRP12   | 2                  | 4                  | 2.12               | 2                  | 4                  | 0                  | 0                  | 0                  | 0.98           | 1              | 3              | 0                 | 0                 |
| 398364937 | TOP2    | 6                  | 9                  | 5.25               | 6                  | 9                  | 0                  | 0                  | 0                  | 0              | 0              | 0              | 0                 | 0                 |
| 6324660   | TCB1    | 2                  | 2                  | 2.78               | 2                  | 2                  | 0                  | 0                  | 0                  | 0              | 0              | 0              | 0                 | 0                 |
| 6320056   | COP1    | 10                 | 15                 | 10.82              | 10                 | 15                 | 11.41              | 10                 | 19                 | 2.25           | 3              | 17             | 0                 | 0                 |
| 398365597 | BMH2    | 6                  | 19                 | 21.98              | 6                  | 19                 | 39.56              | 8                  | 23                 | 5.13           | 1              | 3              | 9.89              | 2                 |
| 6325030   | NEW1    | 16                 | 24                 | 16.72              | 16                 | 24                 | 12.29              | 11                 | 13                 | 4.85           | 5              | 16             | 1.34              | 1                 |
| 6321809   | RPS27B  | 2                  | 2                  | 18.29              | 2                  | 2                  | 29.27              | 3                  | 19                 | 10.98          | 1              | 1              | 0                 | 0                 |
| 6321012   | CHD1    | 1                  | 1                  | 0.89               | 1                  | 1                  | 0                  | 0                  | 0                  | 0              | 0              | 0              | 0                 | 0                 |
| 6320499   | SSD1    | 6                  | 9                  | 6.16               | 6                  | 9                  | 4.80               | 4                  | 5                  | 1.12           | 1              | 1              | 0                 | 0                 |
| 6323072   | TRX1    | 6                  | 23                 | 66.02              | 6                  | 23                 | 58.25              | 6                  | 28                 | 22.33          | 2              | 6              | 0                 | 0                 |
| 6325238   | VTC3    | 3                  | 3                  | 3.71               | 3                  | 3                  | 0                  | 0                  | 0                  | 1.20           | 1              | 1              | 1.56              | 1                 |
| 398365319 | MAK21   | 2                  | 2                  | 2.34               | 2                  | 2                  | 1.27               | 1                  | 1                  | 1.27           | 1              | 1              | 0                 | 0                 |
| 398364327 | LSB3    | 3                  | 3                  | 8.93               | 3                  | 3                  | 1.74               | 1                  | 1                  | 7.84           | 2              | 8              | 0                 | 0                 |
| 6319513   | ATP3    | 11                 | 43                 | 40.84              | 11                 | 43                 | 52.09              | 13                 | 48                 | 4.18           | 1              | 9              | 20.58             | 5                 |
| 6324140   | SRP1    | 4                  | 6                  | 7.20               | 4                  | 6                  | 0                  | 0                  | 0                  | 0              | 0              | 0              | 0                 | 0                 |
| 6324297   | HHT2    | 0                  | 0                  | 0                  | 0                  | 0                  | 0                  | 0                  | 0                  | 11.76          | 2              | 11             | 0                 | 0                 |
| 6323306   | DBP9    | 0                  | 0                  | 0                  | 0                  | 0                  | 0                  | 0                  | 0                  | 0              | 0              | 0              | 0                 | 0                 |
| 6324039   | RFC3    | 0                  | 0                  | 2.65               | 1                  | 1                  | 0                  | 0                  | 0                  | 0              | 0              | 0              | 0                 | 0                 |
| 6321193   | RTF1    | 11                 | 55                 | 24.91              | 11                 | 55                 | 0                  | 0                  | 0                  | 0              | 0              | 0              | 0                 | 0                 |
| 398366149 | TRX2    | 6                  | 20                 | 66.35              | 6                  | 20                 | 58.65              | 6                  | 39                 | 9.62           | 1              | 3              | 0                 | 0                 |
| 6322452   | CCT8    | 15                 | 39                 | 30.46              | 15                 | 39                 | 29.58              | 12                 | 26                 | 17.43          | 9              | 89             | 4.40              | 2                 |
| 6321679   | PFK1    | 21                 | 58                 | 26.65              | 21                 | 58                 | 22.70              | 17                 | 37                 | 5.67           | 5              | 66             | 7.19              | 4                 |
| 6324219   | NOP15   | 0                  | 0                  | 0                  | 0                  | 0                  | 10.00              | 2                  | 3                  | 0              | 0              | 0              | 0                 | 0                 |
| 330443717 | CTR9    | 1                  | 1                  | 0.84               | 1                  | 1                  | 0                  | 0                  | 0                  | 0              | 0              | 0              | 0                 | 0                 |
| 6323755   | ILV2    | 13                 | 53                 | 28.24              | 13                 | 53                 | 33.77              | 20                 | 132                | 7.13           | 5              | 104            | 4.66              | 2                 |
| 6320276   | PAA1    | 3                  | 7                  | 16.23              | 3                  | 7                  | 7.33               | 1                  | 2                  | 0              | 0              | 0              | 0                 | 0                 |
| 6681849   | RPL42A  | 3                  | 3                  | 22.64              | 3                  | 3                  | 0                  | 0                  | 0                  | 8.49           | 2              | 5              | 0                 | 0                 |
| 14318517  | SEC4    | 8                  | 38                 | 50.23              | 8                  | 38                 | 50.23              | 8                  | 69                 | 5.58           | 1              | 28             | 0                 | 0                 |
| 6320400   | MSS116  | 7                  | 15                 | 14.16              | 7                  | 15                 | 3.77               | 2                  | 3                  | 6.02           | 3              | 10             | 0                 | 0                 |
| 6321389   | TIF4632 | 1                  | 1                  | 0.98               | 1                  | 1                  | 0                  | 0                  | 0                  | 1.20           | 1              | 1              | 5.80              | 2                 |
| 6324081   | RPA49   | 1                  | 1                  | 3.61               | 1                  | 1                  | 0                  | 0                  | 0                  | 0              | 0              | 0              | 0                 | 0                 |
| 398366347 | MES1    | 14                 | 32                 | 22.24              | 14                 | 32                 | 19.44              | 11                 | 22                 | 3.99           | 3              | 6              | 0                 | 0                 |
| 6320418   | TCP1    | 11                 | 31                 | 23.61              | 11                 | 31                 | 21.29              | 9                  | 30                 | 13.77          | 7              | 39             | 4.83              | 2                 |
| 398365595 | PIL1    | 10                 | 69                 | 39.53              | 10                 | 69                 | 27.43              | 8                  | 58                 | 10.32          | 5              | 8              | 10.32             | 2                 |

Table S1 - Smith-Kinnaman, *et al* (2014) Abbreviations: %SC = percent sequence coverage, UP = unique peptides, PSM = peptide spectrum matches

| Accession | Acronym | UP                 | # PSM              | %SC                | UP                 | # PSM              | %SC                | UP                 | # PSM              | %SC            | UP             | # PSM          | %SC               | UP                |
|-----------|---------|--------------------|--------------------|--------------------|--------------------|--------------------|--------------------|--------------------|--------------------|----------------|----------------|----------------|-------------------|-------------------|
|           |         | BY4741_F<br>LAG_J1 | BY4741_F<br>LAG_J1 | BY4741_FL<br>AG_J2 | BY4741_F<br>LAG_J2 | BY4741_F<br>LAG_J2 | BY4741_FL<br>AG_J3 | BY4741_F<br>LAG_J3 | BY4741_F<br>LAG_J3 | V5_Rtr1_<br>WT | V5_Rtr1_<br>WT | V5_Rtr1_<br>WT | TAP_Rtr1<br>_WT_1 | TAP_Rtr1<br>_WT_1 |
| 398364417 | SAH1    | 2                  | 9                  | 5.12               | 2                  | 9                  | 14.48              | 6                  | 18                 | 0              | 0              | 0              | 2.67              | 1                 |
| 6320396   | RVB1    | 14                 | 42                 | 40.82              | 14                 | 42                 | 19.65              | 7                  | 15                 | 9.72           | 4              | 18             | 0                 | 0                 |
| 6320077   | CDC48   | 22                 | 110                | 35.33              | 22                 | 110                | 35.57              | 23                 | 95                 | 0.96           | 1              | 1              | 1.44              | 1                 |
| 6325025   | FAS2    | 31                 | 53                 | 21.78              | 31                 | 53                 | 15.10              | 23                 | 43                 | 5.03           | 5              | 13             | 1.43              | 2                 |
| 6324517   | THI20   | 20                 | 117                | 47.19              | 20                 | 117                | 23.59              | 9                  | 18                 | 1.81           | 1              | 7              | 0                 | 0                 |
| 6323030   | NOC3    | 1                  | 1                  | 2.41               | 1                  | 1                  | 0                  | 0                  | 0                  | 0              | 0              | 0              | 0                 | 0                 |
| 6320143   | TSR1    | 0                  | 0                  | 0                  | 0                  | 0                  | 0                  | 0                  | 0                  | 0              | 0              | 0              | 0                 | 0                 |
| 6321318   | PRP43   | 2                  | 3                  | 3.26               | 2                  | 3                  | 6.65               | 4                  | 5                  | 0              | 0              | 0              | 0                 | 0                 |
| 6319618   | MAK5    | 1                  | 1                  | 1.42               | 1                  | 1                  | 0                  | 0                  | 0                  | 0              | 0              | 0              | 0                 | 0                 |
| 398364755 | URB1    | 0                  | 0                  | 0                  | 0                  | 0                  | 0                  | 0                  | 0                  | 0              | 0              | 0              | 0                 | 0                 |
| 6320780   | POL5    | 1                  | 1                  | 1.47               | 1                  | 1                  | 0.68               | 1                  | 1                  | 0              | 0              | 0              | 0                 | 0                 |
| 6325021   | RVB2    | 14                 | 43                 | 38.85              | 14                 | 43                 | 14.01              | 5                  | 8                  | 5.10           | 2              | 30             | 6.37              | 2                 |
| 6322350   | CCT7    | 15                 | 35                 | 34.91              | 15                 | 35                 | 16.00              | 7                  | 10                 | 6.91           | 3              | 23             | 2.36              | 1                 |
| 14270688  | UTP20   | 1                  | 1                  | 0.64               | 1                  | 1                  | 0                  | 0                  | 0                  | 0              | 0              | 0              | 0                 | 0                 |
| 6324197   | KRE33   | 3                  | 5                  | 3.31               | 3                  | 5                  | 0                  | 0                  | 0                  | 1.14           | 1              | 1              | 0                 | 0                 |
| 6321816   | RPN1    | 14                 | 22                 | 17.22              | 14                 | 22                 | 4.53               | 3                  | 5                  | 3.73           | 3              | 86             | 0                 | 0                 |
| 6322901   | NAP1    | 10                 | 25                 | 36.93              | 10                 | 25                 | 31.89              | 8                  | 15                 | 0              | 0              | 0              | 8.15              | 2                 |
| 6320030   | GLT1    | 27                 | 48                 | 17.06              | 27                 | 48                 | 11.79              | 17                 | 43                 | 3.36           | 6              | 56             | 1.72              | 2                 |
| 6323470   | CAR2    | 2                  | 2                  | 6.84               | 2                  | 2                  | 7.31               | 2                  | 3                  | 0              | 0              | 0              | 4.95              | 1                 |
| 6320956   | KAP123  | 15                 | 48                 | 17.43              | 15                 | 48                 | 9.16               | 9                  | 25                 | 4.67           | 5              | 41             | 1.80              | 1                 |
| 398365941 | SEC7    | 1                  | 1                  | 0.45               | 1                  | 1                  | 0.60               | 1                  | 1                  | 1.59           | 3              | 8              | 0                 | 0                 |
| 6323324   | GSP1    | 5                  | 10                 | 24.20              | 5                  | 10                 | 15.53              | 3                  | 8                  | 5.02           | 1              | 35             | 0                 | 0                 |
| 6322697   | GPM1    | 6                  | 45                 | 32.39              | 6                  | 45                 | 42.11              | 8                  | 39                 | 8.10           | 2              | 68             | 37.65             | 7                 |
| 6325013   | SRP68   | 2                  | 4                  | 4.51               | 2                  | 4                  | 0                  | 0                  | 0                  | 0              | 0              | 0              | 0                 | 0                 |
| 6322103   | AVT7    | 1                  | 2                  | 1.63               | 1                  | 2                  | 0                  | 0                  | 0                  | 1.63           | 1              | 27             | 0                 | 0                 |
| 6322049   | CCT2    | 16                 | 90                 | 41.56              | 16                 | 90                 | 43.83              | 17                 | 86                 | 0              | 0              | 0              | 10.25             | 3                 |
| 330443694 | SLA2    | 10                 | 14                 | 15.19              | 10                 | 14                 | 3.00               | 2                  | 2                  | 0              | 0              | 0              | 0                 | 0                 |
| 6321804   | YSC84   | 2                  | 3                  | 3.85               | 2                  | 3                  | 1.71               | 1                  | 1                  | 0              | 0              | 0              | 0                 | 0                 |
| 398366021 | CCT6    | 9                  | 16                 | 21.79              | 9                  | 16                 | 21.98              | 9                  | 36                 | 5.31           | 3              | 62             | 2.75              | 1                 |
| 6324042   | SEC21   | 8                  | 14                 | 10.05              | 8                  | 14                 | 8.66               | 5                  | 6                  | 0.96           | 1              | 8              | 0                 | 0                 |
| 398364741 | SCS2    | 3                  | 6                  | 17.21              | 3                  | 6                  | 13.93              | 2                  | 2                  | 9.84           | 2              | 14             | 0                 | 0                 |
| 6325253   | LSP1    | 11                 | 77                 | 38.71              | 11                 | 77                 | 38.42              | 10                 | 70                 | 10.26          | 4              | 33             | 22.29             | 5                 |
| 6321390   | RPT6    | 6                  | 10                 | 17.04              | 6                  | 10                 | 10.37              | 3                  | 5                  | 2.22           | 1              | 9              | 2.96              | 1                 |
| 398364807 | PNC1    | 3                  | 8                  | 17.59              | 3                  | 8                  | 0                  | 0                  | 0                  | 4.17           | 1              | 3              | 0                 | 0                 |
| 6325164   | NOG1    | 6                  | 10                 | 8.81               | 6                  | 10                 | 12.06              | 7                  | 10                 | 1.39           | 1              | 2              | 0                 | 0                 |
| 6319814   | GRX1    | 0                  | 0                  | 0                  | 0                  | 0                  | 0                  | 0                  | 0                  | 0              | 0              | 0              | 0                 | 0                 |
| 6322823   | MAE1    | 9                  | 26                 | 18.09              | 9                  | 26                 | 10.31              | 4                  | 6                  | 13.45          | 8              | 83             | 0                 | 0                 |

Table S1 - Smith-Kinnaman, *et al* (2014) Abbreviations: %SC = percent sequence coverage, UP = unique peptides, PSM = peptide spectrum matches

| Accession | Acronym | UP                 | # PSM              | %SC                | UP                 | # PSM              | %SC                | UP                 | # PSM              | %SC            | UP             | # PSM          | %SC                | UP                 |
|-----------|---------|--------------------|--------------------|--------------------|--------------------|--------------------|--------------------|--------------------|--------------------|----------------|----------------|----------------|--------------------|--------------------|
|           |         | BY4741_F<br>LAG_J1 | BY4741_F<br>LAG_J1 | BY4741_FL<br>AG_J2 | BY4741_F<br>LAG_J2 | BY4741_F<br>LAG_J2 | BY4741_FL<br>AG_J3 | BY4741_F<br>LAG_J3 | BY4741_F<br>LAG_J3 | V5_Rtr1_<br>WT | V5_Rtr1_<br>WT | V5_Rtr1_<br>WT | TAP_Rtr1_<br>_WT_1 | TAP_Rtr1_<br>_WT_1 |
| 6320255   | TPI1    | 3                  | 4                  | 14.52              | 3                  | 4                  | 23.79              | 4                  | 8                  | 3.63           | 1              | 1              | 8.06               | 1                  |
| 6320983   | GDI1    | 4                  | 6                  | 8.65               | 4                  | 6                  | 3.10               | 1                  | 1                  | 0              | 0              | 0              | 0                  | 0                  |
| 398365205 | RPT5    | 12                 | 44                 | 36.87              | 12                 | 44                 | 30.41              | 10                 | 23                 | 8.99           | 4              | 34             | 0                  | 0                  |
| 6324992   | KEL3    | 1                  | 1                  | 1.54               | 1                  | 1                  | 0                  | 0                  | 0                  | 0              | 0              | 0              | 0                  | 0                  |
| 6323028   | DNM1    | 2                  | 3                  | 3.43               | 2                  | 3                  | 1.85               | 1                  | 1                  | 0              | 0              | 0              | 0                  | 0                  |
| 398365977 | RPT4    | 4                  | 8                  | 10.07              | 4                  | 8                  | 2.75               | 1                  | 1                  | 0              | 0              | 0              | 2.75               | 1                  |
| 6320058   | CCT4    | 7                  | 24                 | 17.05              | 7                  | 24                 | 17.61              | 7                  | 13                 | 8.14           | 3              | 36             | 3.03               | 1                  |
| 6320379   | HMO1    | 3                  | 4                  | 13.41              | 3                  | 4                  | 16.67              | 3                  | 11                 | 0              | 0              | 0              | 0                  | 0                  |
| 6322508   | CYC1    | 0                  | 0                  | 0                  | 0                  | 0                  | 0                  | 0                  | 0                  | 7.34           | 1              | 1              | 0                  | 0                  |
| 6325137   | VPS30   | 0                  | 0                  | 0                  | 0                  | 0                  | 0                  | 0                  | 0                  | 0              | 0              | 0              | 0                  | 0                  |
| 6321301   | SEC27   | 9                  | 18                 | 13.39              | 9                  | 18                 | 24.30              | 17                 | 37                 | 7.99           | 7              | 25             | 0                  | 0                  |
| 6321673   | YHB1    | 2                  | 5                  | 7.27               | 2                  | 5                  | 11.78              | 3                  | 18                 | 0              | 0              | 0              | 0                  | 0                  |
| 27469359  | SYN8    | 0                  | 0                  | 0                  | 0                  | 0                  | 0                  | 0                  | 0                  | 0              | 0              | 0              | 0                  | 0                  |
| 6324433   | CDC33   | 4                  | 13                 | 18.78              | 4                  | 13                 | 21.13              | 5                  | 11                 | 21.60          | 5              | 16             | 0                  | 0                  |
| 6323571   | POB3    | 4                  | 4                  | 9.60               | 4                  | 4                  | 6.52               | 2                  | 2                  | 0              | 0              | 0              | 0                  | 0                  |
| 398365157 | NOP2    | 4                  | 5                  | 8.09               | 4                  | 5                  | 16.18              | 7                  | 8                  | 0              | 0              | 0              | 0                  | 0                  |
| 6321228   | YPT32   | 7                  | 40                 | 35.14              | 7                  | 40                 | 36.49              | 8                  | 74                 | 4.95           | 1              | 17             | 0                  | 0                  |
| 398366559 | RPT3    | 6                  | 16                 | 18.69              | 6                  | 16                 | 6.78               | 2                  | 2                  | 0              | 0              | 0              | 2.80               | 1                  |
| 6322704   | RPT1    | 9                  | 17                 | 20.99              | 9                  | 17                 | 12.63              | 5                  | 10                 | 14.56          | 6              | 61             | 2.57               | 1                  |
| 398366379 | PRT1    | 19                 | 42                 | 27.65              | 19                 | 42                 | 17.69              | 10                 | 15                 | 4.85           | 4              | 7              | 1.70               | 1                  |
| 398365125 | PDA1    | 8                  | 12                 | 20.95              | 8                  | 12                 | 19.29              | 7                  | 21                 | 7.86           | 3              | 7              | 7.14               | 2                  |
| 398364913 | GND1    | 6                  | 11                 | 17.18              | 6                  | 11                 | 5.52               | 2                  | 6                  | 0              | 0              | 0              | 9.20               | 4                  |
| 6322637   | SAC1    | 3                  | 6                  | 6.74               | 3                  | 6                  | 4.82               | 2                  | 2                  | 1.61           | 1              | 8              | 0                  | 0                  |
| 398365933 | CYS4    | 20                 | 194                | 52.47              | 20                 | 194                | 66.47              | 30                 | 154                | 9.86           | 5              | 77             | 24.85              | 8                  |
| 6323903   | FAA4    | 6                  | 11                 | 11.10              | 6                  | 11                 | 7.06               | 4                  | 5                  | 4.18           | 3              | 47             | 0                  | 0                  |
| 6319806   | PDI1    | 14                 | 70                 | 34.87              | 14                 | 70                 | 37.74              | 15                 | 73                 | 7.85           | 3              | 10             | 7.66               | 2                  |
| 6323512   | PHO84   | 0                  | 0                  | 0                  | 0                  | 0                  | 0                  | 0                  | 0                  | 0              | 0              | 0              | 0                  | 0                  |
| 6325367   | RPC40   | 5                  | 5                  | 19.10              | 5                  | 5                  | 13.43              | 4                  | 7                  | 0              | 0              | 0              | 0                  | 0                  |
| 6319835   | GBP2    | 2                  | 2                  | 5.85               | 2                  | 2                  | 4.22               | 1                  | 1                  | 0              | 0              | 0              | 0                  | 0                  |
| 6319290   | MYO4    | 0                  | 0                  | 0                  | 0                  | 0                  | 0                  | 0                  | 0                  | 0              | 0              | 0              | 0                  | 0                  |
| 14318531  | GCN20   | 4                  | 9                  | 6.38               | 4                  | 9                  | 2.79               | 2                  | 2                  | 7.98           | 6              | 19             | 0                  | 0                  |
| 6320869   | YPT31   | 9                  | 46                 | 49.33              | 9                  | 46                 | 68.16              | 11                 | 96                 | 4.93           | 1              | 17             | 0                  | 0                  |
| 398365617 | UTP22   | 2                  | 2                  | 1.62               | 2                  | 2                  | 1.13               | 1                  | 1                  | 0              | 0              | 0              | 0                  | 0                  |
| 398366209 | RTN1    | 3                  | 5                  | 13.22              | 3                  | 5                  | 14.24              | 4                  | 13                 | 14.24          | 4              | 87             | 9.83               | 2                  |
| 6325097   | CDC60   | 15                 | 30                 | 17.61              | 15                 | 30                 | 22.20              | 18                 | 38                 | 0              | 0              | 0              | 0                  | 0                  |
| 6323294   | RPS28B  | 2                  | 22                 | 31.34              | 2                  | 22                 | 37.31              | 3                  | 30                 | 0              | 0              | 0              | 13.43              | 1                  |
| 6325151   | SSE1    | 25                 | 178                | 41.56              | 25                 | 178                | 48.92              | 29                 | 256                | 8.37           | 6              | 92             | 11.69              | 6                  |

Table S1 - Smith-Kinnaman, *et al* (2014) Abbreviations: %SC = percent sequence coverage, UP = unique peptides, PSM = peptide spectrum matches

| Accession | Acronym | UP                 | # PSM              | %SC                | UP                 | # PSM              | %SC                | UP                 | # PSM              | %SC            | UP             | # PSM          | %SC               | UP                |
|-----------|---------|--------------------|--------------------|--------------------|--------------------|--------------------|--------------------|--------------------|--------------------|----------------|----------------|----------------|-------------------|-------------------|
|           |         | BY4741_F<br>LAG_J1 | BY4741_F<br>LAG_J1 | BY4741_FL<br>AG_J2 | BY4741_F<br>LAG_J2 | BY4741_F<br>LAG_J2 | BY4741_FL<br>AG_J3 | BY4741_F<br>LAG_J3 | BY4741_F<br>LAG_J3 | V5_Rtr1_<br>WT | V5_Rtr1_<br>WT | V5_Rtr1_<br>WT | TAP_Rtr1<br>_WT_1 | TAP_Rtr1<br>_WT_1 |
| 398365213 | ARL1    | 2                  | 3                  | 13.66              | 2                  | 3                  | 0                  | 0                  | 0                  | 7.65           | 1              | 1              | 0                 | 0                 |
| 6319587   | YSA1    | 2                  | 2                  | 11.69              | 2                  | 2                  | 0                  | 0                  | 0                  | 0              | 0              | 0              | 0                 | 0                 |
| 14318480  | YPT1    | 8                  | 54                 | 49.51              | 8                  | 54                 | 53.40              | 11                 | 81                 | 6.80           | 1              | 4              | 0                 | 0                 |
| 398366227 | SEC26   | 12                 | 16                 | 14.18              | 12                 | 16                 | 5.76               | 5                  | 7                  | 3.80           | 3              | 11             | 0                 | 0                 |
| 6322381   | SCP160  | 40                 | 155                | 39.12              | 40                 | 155                | 30.69              | 32                 | 78                 | 7.20           | 10             | 107            | 4.99              | 4                 |
| 6325131   | NAN1    | 3                  | 5                  | 3.79               | 3                  | 5                  | 7.48               | 5                  | 6                  | 2.46           | 2              | 13             | 0                 | 0                 |
| 6320226   | SES1    | 9                  | 13                 | 20.56              | 9                  | 13                 | 21.00              | 7                  | 14                 | 3.03           | 1              | 1              | 3.25              | 1                 |
| 6322853   | VPS1    | 12                 | 21                 | 23.44              | 12                 | 21                 | 8.10               | 5                  | 7                  | 7.95           | 5              | 70             | 1.70              | 1                 |
| 6321184   | HXK2    | 10                 | 18                 | 25.31              | 10                 | 18                 | 29.42              | 11                 | 26                 | 6.17           | 3              | 8              | 4.32              | 1                 |
| 6323259   | CDC42   | 3                  | 8                  | 19.90              | 3                  | 8                  | 5.24               | 1                  | 5                  | 5.76           | 1              | 2              | 0                 | 0                 |
| 398366139 | GCD6    | 5                  | 5                  | 8.57               | 5                  | 5                  | 0                  | 0                  | 0                  | 0              | 0              | 0              | 0                 | 0                 |
| 6325267   | RPA135  | 7                  | 8                  | 8.40               | 7                  | 8                  | 7.73               | 6                  | 7                  | 1.41           | 2              | 2              | 1.50              | 1                 |
| 6323722   | PDS5    | 2                  | 2                  | 2.58               | 2                  | 2                  | 0                  | 0                  | 0                  | 1.49           | 2              | 2              | 0                 | 0                 |
| 6319809   | GLK1    | 3                  | 5                  | 6.60               | 3                  | 5                  | 7.80               | 3                  | 6                  | 0              | 0              | 0              | 0                 | 0                 |
| 6321857   | SSF1    | 0                  | 0                  | 0                  | 0                  | 0                  | 0                  | 0                  | 0                  | 0              | 0              | 0              | 0                 | 0                 |
| 6324720   | PNO1    | 5                  | 11                 | 22.63              | 5                  | 11                 | 13.87              | 3                  | 7                  | 20.44          | 6              | 16             | 0                 | 0                 |
| 398364619 | UGP1    | 7                  | 11                 | 18.24              | 7                  | 11                 | 7.01               | 3                  | 3                  | 0              | 0              | 0              | 3.21              | 1                 |
| 6319582   | PHO88   | 4                  | 7                  | 26.06              | 4                  | 7                  | 22.34              | 3                  | 7                  | 11.17          | 2              | 2              | 0                 | 0                 |
| 6325103   | PEP4    | 7                  | 31                 | 24.44              | 7                  | 31                 | 10.86              | 3                  | 4                  | 4.20           | 1              | 1              | 20.49             | 6                 |
| 6319499   | OLA1    | 15                 | 43                 | 39.85              | 15                 | 43                 | 34.01              | 11                 | 27                 | 13.96          | 6              | 143            | 7.87              | 2                 |
| 6322254   | LAA1    | 0                  | 0                  | 0                  | 0                  | 0                  | 0                  | 0                  | 0                  | 0              | 0              | 0              | 0                 | 0                 |
| 6322385   | NET1    | 2                  | 3                  | 2.10               | 2                  | 3                  | 1.26               | 1                  | 2                  | 0              | 0              | 0              | 0                 | 0                 |
| 82795243  | NHP2    | 0                  | 0                  | 0                  | 0                  | 0                  | 9.62               | 1                  | 1                  | 0              | 0              | 0              | 0                 | 0                 |
| 6325039   | BMS1    | 0                  | 0                  | 0                  | 0                  | 0                  | 1.10               | 1                  | 1                  | 0              | 0              | 0              | 0                 | 0                 |
| 398365715 | ENP1    | 0                  | 0                  | 0                  | 0                  | 0                  | 3.52               | 1                  | 1                  | 6.63           | 2              | 2              | 0                 | 0                 |
| 398366507 | SVF1    | 6                  | 19                 | 17.46              | 6                  | 19                 | 28.69              | 10                 | 127                | 0              | 0              | 0              | 0                 | 0                 |
| 6322866   | YPT52   | 7                  | 28                 | 42.74              | 7                  | 28                 | 60.68              | 10                 | 37                 | 3.85           | 1              | 1              | 0                 | 0                 |
| 6320197   | RPT2    | 8                  | 19                 | 24.94              | 8                  | 19                 | 5.49               | 2                  | 2                  | 1.83           | 1              | 9              | 0                 | 0                 |
| 398364435 | GVP36   | 11                 | 56                 | 38.65              | 11                 | 56                 | 49.39              | 12                 | 45                 | 10.12          | 3              | 25             | 0                 | 0                 |
| 6324273   | POR1    | 8                  | 13                 | 36.04              | 8                  | 13                 | 12.72              | 3                  | 5                  | 9.54           | 2              | 33             | 0                 | 0                 |
| 83578109  | JIP5    | 0                  | 0                  | 0                  | 0                  | 0                  | 0                  | 0                  | 0                  | 0              | 0              | 0              | 0                 | 0                 |
| 154199622 | HRB1    | 0                  | 0                  | 0                  | 0                  | 0                  | 0                  | 0                  | 0                  | 0              | 0              | 0              | 0                 | 0                 |
| 10383791  | RIM1    | 3                  | 4                  | 28.89              | 3                  | 4                  | 17.04              | 2                  | 4                  | 0              | 0              | 0              | 0                 | 0                 |
| 6325345   | SRP54   | 3                  | 6                  | 6.47               | 3                  | 6                  | 4.07               | 2                  | 3                  | 3.33           | 1              | 5              | 0                 | 0                 |
| 398366281 | SDA1    | 1                  | 1                  | 1.83               | 1                  | 1                  | 0.91               | 1                  | 1                  | 0              | 0              | 0              | 0                 | 0                 |
| 398366061 | IKI3    | 5                  | 5                  | 4.08               | 5                  | 5                  | 5.34               | 6                  | 9                  | 0.74           | 1              | 1              | 0                 | 0                 |
| 6321940   | CRP1    | 2                  | 2                  | 5.38               | 2                  | 2                  | 3.23               | 1                  | 3                  | 0              | 0              | 0              | 0                 | 0                 |

Table S1 - Smith-Kinnaman, *et al* (2014) Abbreviations: %SC = percent sequence coverage, UP = unique peptides, PSM = peptide spectrum matches

| Accession | Acronym | UP                 | # PSM              | %SC                | UP                 | # PSM              | %SC                | UP                 | # PSM              | %SC            | UP             | # PSM          | %SC               | UP                |
|-----------|---------|--------------------|--------------------|--------------------|--------------------|--------------------|--------------------|--------------------|--------------------|----------------|----------------|----------------|-------------------|-------------------|
|           |         | BY4741_F<br>LAG_J1 | BY4741_F<br>LAG_J1 | BY4741_FL<br>AG_J2 | BY4741_F<br>LAG_J2 | BY4741_F<br>LAG_J2 | BY4741_FL<br>AG_J3 | BY4741_F<br>LAG_J3 | BY4741_F<br>LAG_J3 | V5_Rtr1_<br>WT | V5_Rtr1_<br>WT | V5_Rtr1_<br>WT | TAP_Rtr1<br>_WT_1 | TAP_Rtr1<br>_WT_1 |
| 398366337 | APL6    | 1                  | 1                  | 0.99               | 1                  | 1                  | 2.22               | 1                  | 1                  | 0              | 0              | 0              | 0                 | 0                 |
| 6320242   | KRS1    | 10                 | 43                 | 18.78              | 10                 | 43                 | 28.26              | 14                 | 50                 | 5.25           | 3              | 5              | 0                 | 0                 |
| 6324705   | YOR131C | 2                  | 2                  | 9.17               | 2                  | 2                  | 0                  | 0                  | 0                  | 5.50           | 1              | 1              | 0                 | 0                 |
| 6319760   | SSH1    | 2                  | 3                  | 4.69               | 2                  | 3                  | 2.86               | 1                  | 2                  | 1.84           | 1              | 4              | 0                 | 0                 |
| 6323335   | ACO1    | 3                  | 4                  | 5.66               | 3                  | 4                  | 2.83               | 2                  | 3                  | 1.67           | 1              | 1              | 1.67              | 1                 |
| 330443748 | GLN1    | 6                  | 14                 | 17.84              | 6                  | 14                 | 17.30              | 5                  | 15                 | 15.14          | 6              | 40             | 0                 | 0                 |
| 6319464   | SLA1    | 2                  | 2                  | 1.53               | 2                  | 2                  | 1.05               | 1                  | 1                  | 0              | 0              | 0              | 0                 | 0                 |
| 14627173  | BBC1    | 1                  | 2                  | 0.95               | 1                  | 2                  | 0                  | 0                  | 0                  | 0.95           | 1              | 4              | 0                 | 0                 |
| 398364931 | URB2    | 0                  | 0                  | 0                  | 0                  | 0                  | 0                  | 0                  | 0                  | 0              | 0              | 0              | 0                 | 0                 |
| 6325423   | RHO1    | 5                  | 8                  | 42.58              | 5                  | 8                  | 35.41              | 5                  | 9                  | 0              | 0              | 0              | 0                 | 0                 |
| 6321837   | AAP1    | 1                  | 1                  | 1.05               | 1                  | 1                  | 0                  | 0                  | 0                  | 0              | 0              | 0              | 0                 | 0                 |
| 6319281   | RBG1    | 2                  | 2                  | 7.86               | 2                  | 2                  | 10.30              | 2                  | 2                  | 4.61           | 2              | 2              | 0                 | 0                 |
| 6323379   | KAP95   | 2                  | 3                  | 3.14               | 2                  | 3                  | 3.37               | 2                  | 3                  | 0              | 0              | 0              | 0                 | 0                 |
| 398366047 | RNR4    | 10                 | 47                 | 37.10              | 10                 | 47                 | 33.33              | 9                  | 52                 | 4.06           | 1              | 6              | 13.62             | 3                 |
| 6322446   | CCT3    | 12                 | 31                 | 28.84              | 12                 | 31                 | 18.73              | 8                  | 25                 | 14.04          | 7              | 24             | 0                 | 0                 |
| 398365063 | LAT1    | 5                  | 13                 | 15.15              | 5                  | 13                 | 12.45              | 5                  | 6                  | 0              | 0              | 0              | 14.32             | 5                 |
| 6322427   | HCA4    | 0                  | 0                  | 0                  | 0                  | 0                  | 1.82               | 1                  | 1                  | 0              | 0              | 0              | 0                 | 0                 |
| 6322073   | RHO3    | 4                  | 7                  | 19.91              | 4                  | 7                  | 0                  | 0                  | 0                  | 0              | 0              | 0              | 0                 | 0                 |
| 6324630   | NOB1    | 2                  | 2                  | 4.36               | 2                  | 2                  | 0                  | 0                  | 0                  | 1.96           | 1              | 2              | 0                 | 0                 |
| 398364409 | RET2    | 0                  | 0                  | 0                  | 0                  | 0                  | 2.38               | 1                  | 1                  | 0              | 0              | 0              | 0                 | 0                 |
| 6319796   | SPB1    | 3                  | 5                  | 4.88               | 3                  | 5                  | 0                  | 0                  | 0                  | 0              | 0              | 0              | 0                 | 0                 |
| 6323968   | PSE1    | 1                  | 1                  | 1.01               | 1                  | 1                  | 1.56               | 1                  | 5                  | 3.67           | 2              | 10             | 0                 | 0                 |
| 6322934   | RPF2    | 1                  | 3                  | 2.62               | 1                  | 3                  | 6.10               | 2                  | 2                  | 0              | 0              | 0              | 0                 | 0                 |
| 398365233 | RPS21A  | 0                  | 0                  | 26.44              | 2                  | 4                  | 36.78              | 3                  | 18                 | 14.94          | 1              | 3              | 0                 | 0                 |
| 6322325   | RPS21B  | 3                  | 6                  | 44.83              | 3                  | 6                  | 55.17              | 4                  | 20                 | 14.94          | 1              | 3              | 0                 | 0                 |
| 398366473 | SSF2    | 0                  | 0                  | 0                  | 0                  | 0                  | 0                  | 0                  | 0                  | 0              | 0              | 0              | 0                 | 0                 |
| 86559466  | CTT1    | 0                  | 0                  | 0                  | 0                  | 0                  | 0                  | 0                  | 0                  | 0              | 0              | 0              | 0                 | 0                 |
| 6325449   | QCR2    | 6                  | 8                  | 19.02              | 6                  | 8                  | 7.34               | 2                  | 2                  | 0              | 0              | 0              | 0                 | 0                 |
| 6323537   | TSL1    | 5                  | 5                  | 5.56               | 5                  | 5                  | 1.18               | 1                  | 1                  | 0              | 0              | 0              | 0                 | 0                 |
| 6320914   | RNR1    | 13                 | 33                 | 17.34              | 13                 | 33                 | 18.92              | 12                 | 30                 | 4.95           | 5              | 37             | 2.03              | 1                 |
| 6323182   | ACS2    | 13                 | 27                 | 24.60              | 13                 | 27                 | 22.99              | 14                 | 32                 | 6.44           | 5              | 107            | 0                 | 0                 |
| 6319432   | URA7    | 15                 | 44                 | 27.81              | 15                 | 44                 | 18.31              | 8                  | 15                 | 15.89          | 10             | 179            | 0                 | 0                 |
| 6323135   | MDN1    | 1                  | 2                  | 0.22               | 1                  | 2                  | 0                  | 0                  | 0                  | 0              | 0              | 0              | 0                 | 0                 |
| 398365477 | ATP2    | 14                 | 101                | 38.16              | 14                 | 101                | 30.92              | 11                 | 48                 | 5.87           | 3              | 11             | 18.59             | 7                 |
| 6322988   | VPS13   | 8                  | 8                  | 2.96               | 8                  | 8                  | 0.54               | 1                  | 1                  | 1.62           | 3              | 7              | 0                 | 0                 |
| 6322794   | TMA19   | 5                  | 12                 | 29.94              | 5                  | 12                 | 34.13              | 6                  | 20                 | 0              | 0              | 0              | 17.96             | 2                 |
| 6323037   | RLP24   | 1                  | 1                  | 6.53               | 1                  | 1                  | 11.56              | 2                  | 2                  | 0              | 0              | 0              | 0                 | 0                 |

Table S1 - Smith-Kinnaman, *et al* (2014) Abbreviations: %SC = percent sequence coverage, UP = unique peptides, PSM = peptide spectrum matches

| Accession | Acronym | UP                 | # PSM              | %SC                | UP                 | # PSM              | %SC                | UP                 | # PSM              | %SC            | UP             | # PSM          | %SC                | UP                 |
|-----------|---------|--------------------|--------------------|--------------------|--------------------|--------------------|--------------------|--------------------|--------------------|----------------|----------------|----------------|--------------------|--------------------|
|           |         | BY4741_F<br>LAG_J1 | BY4741_F<br>LAG_J1 | BY4741_FL<br>AG_J2 | BY4741_F<br>LAG_J2 | BY4741_F<br>LAG_J2 | BY4741_FL<br>AG_J3 | BY4741_F<br>LAG_J3 | BY4741_F<br>LAG_J3 | V5_Rtr1_<br>WT | V5_Rtr1_<br>WT | V5_Rtr1_<br>WT | TAP_Rtr1_<br>_WT_1 | TAP_Rtr1_<br>_WT_1 |
| 398364441 | NOT3    | 8                  | 12                 | 13.16              | 8                  | 12                 | 7.54               | 4                  | 5                  | 0              | 0              | 0              | 0                  | 0                  |
| 398366191 | RPN13   | 1                  | 1                  | 8.33               | 1                  | 1                  | 22.44              | 3                  | 6                  | 0              | 0              | 0              | 0                  | 0                  |
| 6321453   | YGR016W | 0                  | 0                  | 0                  | 0                  | 0                  | 0                  | 0                  | 0                  | 0              | 0              | 0              | 0                  | 0                  |
| 6320930   | ILV1    | 14                 | 90                 | 33.85              | 14                 | 90                 | 31.60              | 12                 | 43                 | 7.99           | 5              | 33             | 3.65               | 1                  |
| 6323016   | PUF3    | 1                  | 1                  | 1.14               | 1                  | 1                  | 0                  | 0                  | 0                  | 0              | 0              | 0              | 0                  | 0                  |
| 37362700  | SRP72   | 0                  | 0                  | 0                  | 0                  | 0                  | 5.47               | 2                  | 3                  | 0              | 0              | 0              | 0                  | 0                  |
| 6321326   | TAF6    | 3                  | 5                  | 8.91               | 3                  | 5                  | 0                  | 0                  | 0                  | 0              | 0              | 0              | 0                  | 0                  |
| 6322565   | ADO1    | 0                  | 0                  | 0                  | 0                  | 0                  | 10.59              | 2                  | 2                  | 3.53           | 1              | 3              | 0                  | 0                  |
| 6319722   | ISW1    | 4                  | 6                  | 4.34               | 4                  | 6                  | 0                  | 0                  | 0                  | 1.95           | 1              | 3              | 0                  | 0                  |
| 330443605 | SET2    | 2                  | 2                  | 3.68               | 2                  | 2                  | 0                  | 0                  | 0                  | 0              | 0              | 0              | 0                  | 0                  |
| 398365101 | ARP3    | 3                  | 3                  | 6.68               | 3                  | 3                  | 4.90               | 2                  | 6                  | 5.12           | 2              | 3              | 0                  | 0                  |
| 6321780   | STE20   | 0                  | 0                  | 0                  | 0                  | 0                  | 1.28               | 1                  | 2                  | 1.92           | 1              | 1              | 0                  | 0                  |
| 6321776   | PRS3    | 6                  | 8                  | 22.19              | 6                  | 8                  | 24.69              | 7                  | 9                  | 9.06           | 3              | 64             | 0                  | 0                  |
| 6323214   | RPL37A  | 0                  | 0                  | 0                  | 0                  | 0                  | 13.64              | 1                  | 1                  | 39.77          | 5              | 36             | 13.64              | 1                  |
| 6321757   | ECM29   | 0                  | 0                  | 0                  | 0                  | 0                  | 1.12               | 1                  | 3                  | 1.12           | 2              | 3              | 0                  | 0                  |
| 398365069 | ADH5    | 2                  | 10                 | 5.70               | 2                  | 10                 | 2.28               | 1                  | 23                 | 3.42           | 1              | 1              | 2.28               | 1                  |
| 398365695 | CPR8    | 0                  | 0                  | 0                  | 0                  | 0                  | 0                  | 0                  | 0                  | 0              | 0              | 0              | 0                  | 0                  |
| 6319854   | RVS161  | 4                  | 12                 | 19.62              | 4                  | 12                 | 2.64               | 1                  | 1                  | 6.42           | 2              | 6              | 0                  | 0                  |
| 6324620   | DBP5    | 6                  | 10                 | 17.43              | 6                  | 10                 | 5.81               | 2                  | 4                  | 6.22           | 3              | 8              | 0                  | 0                  |
| 6321399   | YGL039W | 2                  | 3                  | 9.20               | 2                  | 3                  | 4.60               | 1                  | 1                  | 0              | 0              | 0              | 0                  | 0                  |
| 398365061 | SUP45   | 14                 | 34                 | 40.27              | 14                 | 34                 | 16.48              | 6                  | 9                  | 3.66           | 1              | 1              | 4.35               | 1                  |
| 6324673   | KTR1    | 6                  | 10                 | 16.54              | 6                  | 10                 | 3.31               | 1                  | 1                  | 0              | 0              | 0              | 0                  | 0                  |
| 6323387   | ILV5    | 9                  | 15                 | 28.10              | 9                  | 15                 | 29.87              | 9                  | 15                 | 0              | 0              | 0              | 0                  | 0                  |
| 6323795   | TIF34   | 10                 | 16                 | 38.62              | 10                 | 16                 | 27.09              | 7                  | 12                 | 10.09          | 3              | 9              | 0                  | 0                  |
| 6322667   | PRS1    | 5                  | 15                 | 16.39              | 5                  | 15                 | 18.03              | 6                  | 15                 | 3.28           | 1              | 14             | 7.73               | 2                  |
| 6320910   | RGI1    | 0                  | 0                  | 0                  | 0                  | 0                  | 0                  | 0                  | 0                  | 0              | 0              | 0              | 0                  | 0                  |
| 398365575 | HOM6    | 0                  | 0                  | 0                  | 0                  | 0                  | 0                  | 0                  | 0                  | 0              | 0              | 0              | 0                  | 0                  |
| 6323916   | TIF11   | 2                  | 2                  | 15.03              | 2                  | 2                  | 26.80              | 3                  | 3                  | 0              | 0              | 0              | 0                  | 0                  |
| 6321612   | RBG2    | 4                  | 8                  | 14.95              | 4                  | 8                  | 2.99               | 1                  | 3                  | 8.15           | 3              | 5              | 8.97               | 2                  |
| 6323225   | PWP1    | 6                  | 7                  | 13.89              | 6                  | 7                  | 7.12               | 4                  | 6                  | 1.56           | 1              | 1              | 0                  | 0                  |
| 6324737   | SSP1    | 0                  | 0                  | 0                  | 0                  | 0                  | 6.38               | 1                  | 1                  | 6.38           | 1              | 4              | 0                  | 0                  |
| 6323450   | CDC73   | 2                  | 2                  | 5.60               | 2                  | 2                  | 0                  | 0                  | 0                  | 0              | 0              | 0              | 0                  | 0                  |
| 398365461 | SRP40   | 1                  | 1                  | 2.96               | 1                  | 1                  | 0                  | 0                  | 0                  | 0              | 0              | 0              | 0                  | 0                  |
| 6320708   | RPL37B  | 0                  | 0                  | 0                  | 0                  | 0                  | 0                  | 0                  | 0                  | 26.14          | 4              | 15             | 0                  | 0                  |
| 398364957 | MKT1    | 2                  | 2                  | 4.10               | 2                  | 2                  | 1.33               | 1                  | 1                  | 1.20           | 1              | 1              | 0                  | 0                  |
| 6320079   | YDL124W | 1                  | 1                  | 4.49               | 1                  | 1                  | 8.33               | 2                  | 2                  | 0              | 0              | 0              | 0                  | 0                  |
| 398364371 | RSC8    | 2                  | 2                  | 5.21               | 2                  | 2                  | 4.31               | 2                  | 2                  | 5.21           | 2              | 2              | 0                  | 0                  |



Table S1 - Smith-Kinnaman, *et al* (2014) Abbreviations: %SC = percent sequence coverage, UP = unique peptides, PSM = peptide spectrum matches

| Accession | Acronym  | UP                 | # PSM              | %SC                | UP                 | # PSM              | %SC                | UP                 | # PSM              | %SC            | UP             | # PSM          | %SC               | UP                |
|-----------|----------|--------------------|--------------------|--------------------|--------------------|--------------------|--------------------|--------------------|--------------------|----------------|----------------|----------------|-------------------|-------------------|
|           |          | BY4741_F<br>LAG_J1 | BY4741_F<br>LAG_J1 | BY4741_FL<br>AG_J2 | BY4741_F<br>LAG_J2 | BY4741_F<br>LAG_J2 | BY4741_FL<br>AG_J3 | BY4741_F<br>LAG_J3 | BY4741_F<br>LAG_J3 | V5_Rtr1_<br>WT | V5_Rtr1_<br>WT | V5_Rtr1_<br>WT | TAP_Rtr1<br>_WT_1 | TAP_Rtr1<br>_WT_1 |
| 6325418   | GPH1     | 8                  | 8                  | 11.97              | 8                  | 8                  | 0                  | 0                  | 0                  | 0              | 0              | 0              | 0                 | 0                 |
| 6321859   | DYS1     | 3                  | 4                  | 8.01               | 3                  | 4                  | 17.31              | 5                  | 15                 | 0              | 0              | 0              | 3.10              | 1                 |
| 6323967   | GAS1     | 8                  | 20                 | 17.53              | 8                  | 20                 | 7.87               | 4                  | 9                  | 4.11           | 3              | 10             | 2.68              | 1                 |
| 6319695   | PYC2     | 11                 | 19                 | 10.68              | 11                 | 19                 | 6.44               | 6                  | 9                  | 6.53           | 8              | 30             | 6.10              | 5                 |
| 6323642   | YPT7     | 9                  | 82                 | 60.10              | 9                  | 82                 | 65.38              | 10                 | 106                | 5.29           | 1              | 17             | 0                 | 0                 |
| 6320552   | HXT3     | 1                  | 1                  | 2.12               | 1                  | 1                  | 3.70               | 1                  | 1                  | 0              | 0              | 0              | 0                 | 0                 |
| 6325196   | ALD6     | 3                  | 4                  | 6.60               | 3                  | 4                  | 13.20              | 5                  | 6                  | 2.20           | 1              | 13             | 0                 | 0                 |
| 6319315   | EFB1     | 4                  | 32                 | 23.30              | 4                  | 32                 | 21.84              | 4                  | 28                 | 0              | 0              | 0              | 0                 | 0                 |
| 10383811  | CDC39    | 2                  | 2                  | 1.42               | 2                  | 2                  | 0.71               | 1                  | 1                  | 0.52           | 1              | 3              | 0                 | 0                 |
| 6321753   | SBP1     | 5                  | 18                 | 23.47              | 5                  | 18                 | 27.55              | 5                  | 24                 | 0              | 0              | 0              | 4.42              | 1                 |
| 6320764   | DLD3     | 1                  | 1                  | 2.22               | 1                  | 1                  | 0                  | 0                  | 0                  | 0              | 0              | 0              | 0                 | 0                 |
| 398366413 | ERV29    | 0                  | 0                  | 0                  | 0                  | 0                  | 0                  | 0                  | 0                  | 0              | 0              | 0              | 0                 | 0                 |
| 6320969   | GLO3     | 1                  | 3                  | 1.42               | 1                  | 3                  | 0                  | 0                  | 0                  | 1.42           | 1              | 59             | 0                 | 0                 |
| 6319602   | TPS1     | 6                  | 15                 | 15.76              | 6                  | 15                 | 10.71              | 4                  | 9                  | 0              | 0              | 0              | 2.22              | 1                 |
| 6579193   | NMD2     | 0                  | 0                  | 0                  | 0                  | 0                  | 0                  | 0                  | 0                  | 0              | 0              | 0              | 0                 | 0                 |
| 6321990   | UTP9     | 3                  | 4                  | 7.30               | 3                  | 4                  | 6.09               | 3                  | 4                  | 0              | 0              | 0              | 0                 | 0                 |
| 398366561 | SXM1     | 0                  | 0                  | 0                  | 0                  | 0                  | 1.06               | 1                  | 1                  | 0              | 0              | 0              | 0                 | 0                 |
| 6320157   | NPC2     | 0                  | 0                  | 0                  | 0                  | 0                  | 0                  | 0                  | 0                  | 0              | 0              | 0              | 0                 | 0                 |
| 398364687 | NOP9     | 0                  | 0                  | 0                  | 0                  | 0                  | 0                  | 0                  | 0                  | 0              | 0              | 0              | 0                 | 0                 |
| 22532997  | BUD27    | 0                  | 0                  | 0                  | 0                  | 0                  | 0                  | 0                  | 0                  | 0              | 0              | 0              | 0                 | 0                 |
| 398366449 | BFR2     | 3                  | 4                  | 5.62               | 3                  | 4                  | 8.99               | 4                  | 6                  | 0              | 0              | 0              | 0                 | 0                 |
| 398365717 | TRM1     | 3                  | 4                  | 5.44               | 3                  | 4                  | 9.82               | 4                  | 9                  | 0              | 0              | 0              | 4.21              | 2                 |
| 6323362   | CHS5     | 0                  | 0                  | 0                  | 0                  | 0                  | 2.24               | 1                  | 2                  | 0              | 0              | 0              | 0                 | 0                 |
| 398364573 | PAN1     | 6                  | 8                  | 5.20               | 6                  | 8                  | 10.00              | 11                 | 27                 | 0              | 0              | 0              | 3.78              | 3                 |
| 6320720   | GRX2     | 1                  | 1                  | 6.99               | 1                  | 1                  | 6.99               | 1                  | 2                  | 0              | 0              | 0              | 0                 | 0                 |
| 6321595   | PTI1     | 0                  | 0                  | 0                  | 0                  | 0                  | 6.12               | 1                  | 1                  | 0              | 0              | 0              | 0                 | 0                 |
| 398364853 | OCA1     | 1                  | 1                  | 5.46               | 1                  | 1                  | 0                  | 0                  | 0                  | 4.20           | 1              | 1              | 0                 | 0                 |
| 6323852   | YMR196   | 0                  | 0                  | 0                  | 0                  | 0                  | 0                  | 0                  | 0                  | 0              | 0              | 0              | 0                 | 0                 |
| 33438816  | YILO02W- | 0                  | 0                  | 0                  | 0                  | 0                  | 0                  | 0                  | 0                  | 0              | 0              | 0              | 0                 | 0                 |
| 398366575 | RRP17    | 0                  | 0                  | 0                  | 0                  | 0                  | 0                  | 0                  | 0                  | 0              | 0              | 0              | 0                 | 0                 |
| 6323359   | TMA10    | 0                  | 0                  | 0                  | 0                  | 0                  | 0                  | 0                  | 0                  | 0              | 0              | 0              | 0                 | 0                 |
| 398365853 | WTM1     | 4                  | 5                  | 12.59              | 4                  | 5                  | 8.01               | 3                  | 4                  | 4.58           | 2              | 10             | 0                 | 0                 |
| 6320181   | GPD1     | 9                  | 61                 | 31.20              | 9                  | 61                 | 14.83              | 5                  | 7                  | 4.09           | 2              | 12             | 0                 | 0                 |
| 6323518   | NAB6     | 3                  | 3                  | 3.35               | 3                  | 3                  | 0                  | 0                  | 0                  | 0              | 0              | 0              | 0                 | 0                 |
| 6321221   | KIP3     | 0                  | 0                  | 0                  | 0                  | 0                  | 0                  | 0                  | 0                  | 0              | 0              | 0              | 0                 | 0                 |
| 398365131 | RFC2     | 0                  | 0                  | 0                  | 0                  | 0                  | 4.82               | 1                  | 2                  | 0              | 0              | 0              | 0                 | 0                 |
| 6322294   | ERG20    | 4                  | 4                  | 12.22              | 4                  | 4                  | 2.84               | 1                  | 1                  | 2.84           | 1              | 1              | 0                 | 0                 |

Table S1 - Smith-Kinnaman, *et al* (2014) Abbreviations: %SC = percent sequence coverage, UP = unique peptides, PSM = peptide spectrum matches

| Accession | Acronym | UP                 | # PSM              | %SC                | UP                 | # PSM              | %SC                | UP                 | # PSM              | %SC            | UP             | # PSM          | %SC               | UP                |
|-----------|---------|--------------------|--------------------|--------------------|--------------------|--------------------|--------------------|--------------------|--------------------|----------------|----------------|----------------|-------------------|-------------------|
|           |         | BY4741_F<br>LAG_J1 | BY4741_F<br>LAG_J1 | BY4741_FL<br>AG_J2 | BY4741_F<br>LAG_J2 | BY4741_F<br>LAG_J2 | BY4741_FL<br>AG_J3 | BY4741_F<br>LAG_J3 | BY4741_F<br>LAG_J3 | V5_Rtr1_<br>WT | V5_Rtr1_<br>WT | V5_Rtr1_<br>WT | TAP_Rtr1<br>_WT_1 | TAP_Rtr1<br>_WT_1 |
| 6321024   | ECM32   | 0                  | 0                  | 0                  | 0                  | 0                  | 0                  | 0                  | 0                  | 0              | 0              | 0              | 0                 | 0                 |
| 37362660  | FUR1    | 5                  | 17                 | 22.69              | 5                  | 17                 | 34.72              | 8                  | 25                 | 4.63           | 1              | 1              | 0                 | 0                 |
| 398364665 | SEC18   | 11                 | 19                 | 18.73              | 11                 | 19                 | 4.75               | 3                  | 5                  | 2.51           | 2              | 3              | 1.58              | 1                 |
| 6323391   | ADE13   | 0                  | 0                  | 0                  | 0                  | 0                  | 0                  | 0                  | 0                  | 0              | 0              | 0              | 0                 | 0                 |
| 6323699   | STV1    | 3                  | 4                  | 3.37               | 3                  | 4                  | 1.24               | 1                  | 1                  | 0              | 0              | 0              | 0                 | 0                 |
| 6321412   | TRP5    | 17                 | 186                | 35.50              | 17                 | 186                | 28.85              | 15                 | 83                 | 0              | 0              | 0              | 8.77              | 4                 |
| 6321973   | OYE2    | 0                  | 0                  | 0                  | 0                  | 0                  | 4.75               | 1                  | 1                  | 2.25           | 1              | 2              | 0                 | 0                 |
| 6321801   | ARD1    | 0                  | 0                  | 0                  | 0                  | 0                  | 4.62               | 1                  | 1                  | 0              | 0              | 0              | 0                 | 0                 |
| 10383761  | HIS4    | 5                  | 8                  | 8.14               | 5                  | 8                  | 2.13               | 1                  | 2                  | 0              | 0              | 0              | 0                 | 0                 |
| 398365759 | SAC6    | 9                  | 18                 | 18.85              | 9                  | 18                 | 11.37              | 5                  | 11                 | 1.56           | 1              | 1              | 0                 | 0                 |
| 6321721   | BGL2    | 2                  | 3                  | 7.99               | 2                  | 3                  | 7.03               | 2                  | 2                  | 0              | 0              | 0              | 0                 | 0                 |
| 398364979 | CCZ1    | 1                  | 1                  | 1.42               | 1                  | 1                  | 0                  | 0                  | 0                  | 0              | 0              | 0              | 0                 | 0                 |
| 42742256  | VTC4    | 2                  | 2                  | 2.36               | 2                  | 2                  | 2.50               | 2                  | 2                  | 4.85           | 3              | 8              | 0                 | 0                 |
| 6321814   | THR1    | 2                  | 2                  | 5.32               | 2                  | 2                  | 0                  | 0                  | 0                  | 3.08           | 1              | 1              | 0                 | 0                 |
| 10383798  | PHO87   | 0                  | 0                  | 0.76               | 1                  | 1                  | 0                  | 0                  | 0                  | 0              | 0              | 0              | 0                 | 0                 |
| 6319847   | CDC10   | 3                  | 5                  | 15.53              | 3                  | 5                  | 2.48               | 1                  | 1                  | 9.32           | 3              | 6              | 0                 | 0                 |
| 398365363 | URA8    | 6                  | 11                 | 11.94              | 6                  | 11                 | 2.42               | 1                  | 1                  | 6.23           | 4              | 7              | 0                 | 0                 |
| 6323138   | AHP1    | 3                  | 8                  | 29.55              | 3                  | 8                  | 14.77              | 2                  | 2                  | 0              | 0              | 0              | 0                 | 0                 |
| 6320657   | UTP6    | 0                  | 0                  | 0                  | 0                  | 0                  | 0                  | 0                  | 0                  | 0              | 0              | 0              | 0                 | 0                 |
| 6321919   | YHR127W | 0                  | 0                  | 0                  | 0                  | 0                  | 0                  | 0                  | 0                  | 0              | 0              | 0              | 0                 | 0                 |
| 41629688  | PSP2    | 1                  | 2                  | 1.69               | 1                  | 2                  | 1.69               | 1                  | 1                  | 2.87           | 2              | 6              | 0                 | 0                 |
| 398364633 | APS3    | 0                  | 0                  | 0                  | 0                  | 0                  | 0                  | 0                  | 0                  | 0              | 0              | 0              | 0                 | 0                 |
| 6322843   | MRT4    | 3                  | 6                  | 16.10              | 3                  | 6                  | 21.19              | 4                  | 4                  | 4.24           | 1              | 1              | 0                 | 0                 |
| 330443486 | PAT1    | 2                  | 2                  | 2.01               | 2                  | 2                  | 0                  | 0                  | 0                  | 4.15           | 3              | 5              | 2.76              | 1                 |
| 37362659  | RRP3    | 0                  | 0                  | 0                  | 0                  | 0                  | 0                  | 0                  | 0                  | 2.59           | 1              | 11             | 0                 | 0                 |
| 6320845   | SEC3    | 0                  | 0                  | 0                  | 0                  | 0                  | 0                  | 0                  | 0                  | 0              | 0              | 0              | 0                 | 0                 |
| 6324791   | RFC1    | 0                  | 0                  | 0                  | 0                  | 0                  | 0                  | 0                  | 0                  | 0              | 0              | 0              | 0                 | 0                 |
| 6325369   | MRD1    | 1                  | 1                  | 1.58               | 1                  | 1                  | 0                  | 0                  | 0                  | 1.58           | 1              | 1              | 0                 | 0                 |
| 6322635   | YRA2    | 0                  | 0                  | 0                  | 0                  | 0                  | 0                  | 0                  | 0                  | 0              | 0              | 0              | 0                 | 0                 |
| 6320368   | SEC1    | 0                  | 0                  | 0                  | 0                  | 0                  | 0                  | 0                  | 0                  | 0              | 0              | 0              | 0                 | 0                 |
| 398364935 | UBP3    | 4                  | 6                  | 5.04               | 4                  | 6                  | 0                  | 0                  | 0                  | 0              | 0              | 0              | 0                 | 0                 |
| 6320789   | GLY1    | 5                  | 10                 | 17.57              | 5                  | 10                 | 31.27              | 9                  | 26                 | 0              | 0              | 0              | 0                 | 0                 |
| 6325172   | SEC16   | 0                  | 0                  | 0                  | 0                  | 0                  | 0                  | 0                  | 0                  | 0              | 0              | 0              | 0                 | 0                 |
| 398364311 | TMA20   | 2                  | 4                  | 12.71              | 2                  | 4                  | 0                  | 0                  | 0                  | 0              | 0              | 0              | 0                 | 0                 |
| 6320926   | UTP7    | 0                  | 0                  | 0                  | 0                  | 0                  | 0                  | 0                  | 0                  | 0              | 0              | 0              | 0                 | 0                 |
| 330443568 | ENP2    | 0                  | 0                  | 0                  | 0                  | 0                  | 0                  | 0                  | 0                  | 0              | 0              | 0              | 0                 | 0                 |
| 6324328   | CIT1    | 1                  | 1                  | 2.09               | 1                  | 1                  | 0                  | 0                  | 0                  | 2.09           | 1              | 1              | 0                 | 0                 |



Table S1 - Smith-Kinnaman, *et al* (2014) Abbreviations: %SC = percent sequence coverage, UP = unique peptides, PSM = peptide spectrum matches

| Accession | Acronym | UP                 | # PSM              | %SC                | UP                 | # PSM              | %SC                | UP                 | # PSM              | %SC            | UP             | # PSM          | %SC               | UP                |
|-----------|---------|--------------------|--------------------|--------------------|--------------------|--------------------|--------------------|--------------------|--------------------|----------------|----------------|----------------|-------------------|-------------------|
|           |         | BY4741_F<br>LAG_J1 | BY4741_F<br>LAG_J1 | BY4741_FL<br>AG_J2 | BY4741_F<br>LAG_J2 | BY4741_F<br>LAG_J2 | BY4741_FL<br>AG_J3 | BY4741_F<br>LAG_J3 | BY4741_F<br>LAG_J3 | V5_Rtr1_<br>WT | V5_Rtr1_<br>WT | V5_Rtr1_<br>WT | TAP_Rtr1<br>_WT_1 | TAP_Rtr1<br>_WT_1 |
| 6324550   | IFM1    | 0                  | 0                  | 0                  | 0                  | 0                  | 0                  | 0                  | 0                  | 0              | 0              | 0              | 0                 | 0                 |
| 6324950   | ALD4    | 5                  | 5                  | 12.33              | 5                  | 5                  | 6.94               | 2                  | 2                  | 2.12           | 1              | 4              | 3.47              | 1                 |
| 6324635   | CKA2    | 0                  | 0                  | 0                  | 0                  | 0                  | 6.78               | 2                  | 2                  | 0              | 0              | 0              | 0                 | 0                 |
| 6319849   | YCP4    | 4                  | 16                 | 20.65              | 4                  | 16                 | 21.46              | 4                  | 9                  | 0              | 0              | 0              | 0                 | 0                 |
| 6325202   | LGE1    | 1                  | 1                  | 4.52               | 1                  | 1                  | 0                  | 0                  | 0                  | 0              | 0              | 0              | 0                 | 0                 |
| 398366027 | SUR4    | 0                  | 0                  | 0                  | 0                  | 0                  | 4.93               | 1                  | 2                  | 5.22           | 1              | 2              | 0                 | 0                 |
| 6321641   | PCT1    | 0                  | 0                  | 0                  | 0                  | 0                  | 0                  | 0                  | 0                  | 0              | 0              | 0              | 0                 | 0                 |
| 6325280   | EAF3    | 1                  | 1                  | 2.00               | 1                  | 1                  | 0                  | 0                  | 0                  | 3.24           | 1              | 1              | 0                 | 0                 |
| 6320803   | MCM3    | 3                  | 5                  | 4.02               | 3                  | 5                  | 0                  | 0                  | 0                  | 4.33           | 4              | 10             | 0                 | 0                 |
| 6323872   | SKY1    | 1                  | 1                  | 1.48               | 1                  | 1                  | 0                  | 0                  | 0                  | 0              | 0              | 0              | 0                 | 0                 |
| 6325140   | IDI1    | 2                  | 6                  | 9.03               | 2                  | 6                  | 9.38               | 2                  | 5                  | 4.86           | 1              | 6              | 0                 | 0                 |
| 6320049   | SAS10   | 3                  | 3                  | 6.56               | 3                  | 3                  | 4.10               | 2                  | 3                  | 1.31           | 1              | 1              | 0                 | 0                 |
| 6324989   | DIM1    | 3                  | 4                  | 11.01              | 3                  | 4                  | 3.14               | 1                  | 1                  | 0              | 0              | 0              | 0                 | 0                 |
| 398366039 | PBP1    | 1                  | 2                  | 2.22               | 1                  | 2                  | 0                  | 0                  | 0                  | 0              | 0              | 0              | 9.70              | 4                 |
| 6323088   | REX2    | 1                  | 1                  | 4.46               | 1                  | 1                  | 0                  | 0                  | 0                  | 0              | 0              | 0              | 0                 | 0                 |
| 6324899   | PRO2    | 1                  | 1                  | 2.41               | 1                  | 1                  | 0                  | 0                  | 0                  | 0              | 0              | 0              | 0                 | 0                 |
| 398365467 | YNL010W | 2                  | 7                  | 7.47               | 2                  | 7                  | 9.13               | 1                  | 1                  | 3.73           | 1              | 1              | 0                 | 0                 |
| 41629671  | SEA4    | 3                  | 3                  | 2.99               | 3                  | 3                  | 0                  | 0                  | 0                  | 2.41           | 2              | 3              | 0                 | 0                 |
| 6320704   | PUF6    | 1                  | 1                  | 1.83               | 1                  | 1                  | 5.18               | 3                  | 3                  | 0              | 0              | 0              | 0                 | 0                 |
| 6323650   | PLB1    | 1                  | 1                  | 1.66               | 1                  | 1                  | 0                  | 0                  | 0                  | 0              | 0              | 0              | 0                 | 0                 |
| 6323158   | DIP2    | 1                  | 1                  | 1.48               | 1                  | 1                  | 0                  | 0                  | 0                  | 0              | 0              | 0              | 0                 | 0                 |
| 6322727   | SRP21   | 0                  | 0                  | 0                  | 0                  | 0                  | 0                  | 0                  | 0                  | 0              | 0              | 0              | 0                 | 0                 |
| 14318504  | MDJ1    | 0                  | 0                  | 0                  | 0                  | 0                  | 3.33               | 1                  | 1                  | 0              | 0              | 0              | 0                 | 0                 |
| 6322878   | GCN3    | 0                  | 0                  | 0                  | 0                  | 0                  | 0                  | 0                  | 0                  | 3.61           | 1              | 7              | 0                 | 0                 |
| 330443380 | PSK1    | 0                  | 0                  | 0                  | 0                  | 0                  | 0                  | 0                  | 0                  | 0              | 0              | 0              | 0                 | 0                 |
| 398364789 | UFD4    | 0                  | 0                  | 0                  | 0                  | 0                  | 0                  | 0                  | 0                  | 0              | 0              | 0              | 0                 | 0                 |
| 6319903   | PWP2    | 2                  | 3                  | 2.17               | 2                  | 3                  | 1.08               | 1                  | 1                  | 0              | 0              | 0              | 0                 | 0                 |
| 6324613   | CKB2    | 0                  | 0                  | 0                  | 0                  | 0                  | 0                  | 0                  | 0                  | 0              | 0              | 0              | 0                 | 0                 |
| 6324568   | TOP1    | 0                  | 0                  | 0                  | 0                  | 0                  | 1.17               | 1                  | 1                  | 0              | 0              | 0              | 0                 | 0                 |
| 398365393 | MDM32   | 0                  | 0                  | 0                  | 0                  | 0                  | 1.61               | 1                  | 1                  | 0              | 0              | 0              | 0                 | 0                 |
| 6322731   | VPH2    | 0                  | 0                  | 0                  | 0                  | 0                  | 4.19               | 1                  | 1                  | 0              | 0              | 0              | 0                 | 0                 |
| 6323653   | HXT2    | 0                  | 0                  | 0                  | 0                  | 0                  | 0                  | 0                  | 0                  | 0              | 0              | 0              | 0                 | 0                 |
| 6320236   | MRH1    | 1                  | 1                  | 5.00               | 1                  | 1                  | 5.00               | 1                  | 6                  | 3.75           | 2              | 8              | 0                 | 0                 |
| 398364559 | NSP1    | 2                  | 4                  | 3.40               | 2                  | 4                  | 23.33              | 13                 | 23                 | 0              | 0              | 0              | 2.07              | 1                 |
| 6321498   | ADE6    | 4                  | 5                  | 3.90               | 4                  | 5                  | 0                  | 0                  | 0                  | 2.80           | 3              | 14             | 0                 | 0                 |
| 6319326   | ADE1    | 1                  | 4                  | 3.92               | 1                  | 4                  | 7.84               | 2                  | 3                  | 3.27           | 1              | 3              | 0                 | 0                 |
| 6321812   | MYO1    | 1                  | 1                  | 0.47               | 1                  | 1                  | 0.78               | 1                  | 1                  | 0              | 0              | 0              | 5.39              | 7                 |





Table S1 - Smith-Kinnaman, *et al* (2014) Abbreviations: %SC = percent sequence coverage, UP = unique peptides, PSM = peptide spectrum matches

| Accession | Acronym | UP                 | # PSM              | %SC                | UP                 | # PSM              | %SC                | UP                 | # PSM              | %SC            | UP             | # PSM          | %SC                | UP                 |
|-----------|---------|--------------------|--------------------|--------------------|--------------------|--------------------|--------------------|--------------------|--------------------|----------------|----------------|----------------|--------------------|--------------------|
|           |         | BY4741_F<br>LAG_J1 | BY4741_F<br>LAG_J1 | BY4741_FL<br>AG_J2 | BY4741_F<br>LAG_J2 | BY4741_F<br>LAG_J2 | BY4741_FL<br>AG_J3 | BY4741_F<br>LAG_J3 | BY4741_F<br>LAG_J3 | V5_Rtr1_<br>WT | V5_Rtr1_<br>WT | V5_Rtr1_<br>WT | TAP_Rtr1_<br>_WT_1 | TAP_Rtr1_<br>_WT_1 |
| 6324734   | MTR10   | 0                  | 0                  | 0                  | 0                  | 0                  | 0                  | 0                  | 0                  | 0              | 0              | 0              | 0                  | 0                  |
| 6320284   | PET100  | 0                  | 0                  | 0                  | 0                  | 0                  | 0                  | 0                  | 0                  | 0              | 0              | 0              | 0                  | 0                  |
| 6323411   | SEC61   | 0                  | 0                  | 0                  | 0                  | 0                  | 0                  | 0                  | 0                  | 0              | 0              | 0              | 0                  | 0                  |
| 6320883   | ERG28   | 0                  | 0                  | 0                  | 0                  | 0                  | 0                  | 0                  | 0                  | 7.43           | 1              | 10             | 0                  | 0                  |
| 6324593   | YOR019W | 0                  | 0                  | 0                  | 0                  | 0                  | 0                  | 0                  | 0                  | 1.23           | 1              | 2              | 0                  | 0                  |
| 6320432   | ADK1    | 5                  | 7                  | 22.97              | 5                  | 7                  | 31.08              | 6                  | 11                 | 4.05           | 1              | 1              | 0                  | 0                  |
| 6322919   | CCP1    | 1                  | 1                  | 3.60               | 1                  | 1                  | 11.63              | 3                  | 7                  | 0              | 0              | 0              | 0                  | 0                  |
| 6320204   | NTH1    | 5                  | 9                  | 6.66               | 5                  | 9                  | 0                  | 0                  | 0                  | 0              | 0              | 0              | 3.33               | 2                  |
| 6320279   | TPS2    | 9                  | 11                 | 12.61              | 9                  | 11                 | 1.23               | 1                  | 1                  | 0              | 0              | 0              | 7.37               | 5                  |
| 6323681   | CCS1    | 3                  | 4                  | 13.25              | 3                  | 4                  | 10.04              | 2                  | 2                  | 0              | 0              | 0              | 0                  | 0                  |
| 398366097 | ADH6    | 1                  | 1                  | 3.06               | 1                  | 1                  | 16.39              | 4                  | 5                  | 0              | 0              | 0              | 0                  | 0                  |
| 6324381   | NOG2    | 4                  | 4                  | 9.67               | 4                  | 4                  | 2.88               | 1                  | 3                  | 1.85           | 1              | 3              | 0                  | 0                  |
| 6323974   | PRE5    | 2                  | 3                  | 9.40               | 2                  | 3                  | 0                  | 0                  | 0                  | 0              | 0              | 0              | 0                  | 0                  |
| 6320090   | ATG20   | 1                  | 1                  | 2.34               | 1                  | 1                  | 0                  | 0                  | 0                  | 0              | 0              | 0              | 0                  | 0                  |
| 37362683  | SCJ1    | 2                  | 2                  | 8.22               | 2                  | 2                  | 8.22               | 2                  | 4                  | 0              | 0              | 0              | 0                  | 0                  |
| 6323676   | ARP9    | 1                  | 2                  | 2.57               | 1                  | 2                  | 0                  | 0                  | 0                  | 0              | 0              | 0              | 0                  | 0                  |
| 398364547 | SER3    | 5                  | 7                  | 14.29              | 5                  | 7                  | 19.19              | 7                  | 13                 | 6.40           | 3              | 6              | 0                  | 0                  |
| 6319439   | HEK2    | 1                  | 1                  | 3.94               | 1                  | 1                  | 2.10               | 1                  | 1                  | 14.96          | 4              | 81             | 0                  | 0                  |
| 6321964   | NMD3    | 6                  | 8                  | 12.55              | 6                  | 8                  | 13.13              | 6                  | 12                 | 5.41           | 2              | 4              | 0                  | 0                  |
| 6321984   | ERG9    | 2                  | 4                  | 4.50               | 2                  | 4                  | 0                  | 0                  | 0                  | 2.25           | 1              | 1              | 0                  | 0                  |
| 6323768   | ADE17   | 15                 | 27                 | 37.67              | 15                 | 27                 | 4.22               | 2                  | 3                  | 0              | 0              | 0              | 0                  | 0                  |
| 398365401 | CPA2    | 6                  | 11                 | 7.96               | 6                  | 11                 | 12.34              | 10                 | 22                 | 0              | 0              | 0              | 0                  | 0                  |
| 42742253  | ATG27   | 4                  | 6                  | 17.34              | 4                  | 6                  | 0                  | 0                  | 0                  | 0              | 0              | 0              | 0                  | 0                  |
| 6324191   | SRV2    | 7                  | 28                 | 15.78              | 7                  | 28                 | 6.65               | 3                  | 5                  | 5.70           | 1              | 1              | 6.27               | 2                  |
| 6322476   | ILV3    | 10                 | 25                 | 22.74              | 10                 | 25                 | 20.85              | 8                  | 20                 | 3.08           | 2              | 8              | 0                  | 0                  |
| 6321900   | GGA2    | 2                  | 4                  | 4.79               | 2                  | 4                  | 9.91               | 4                  | 6                  | 1.37           | 1              | 3              | 2.91               | 1                  |
| 330443535 | STE2    | 1                  | 2                  | 3.25               | 1                  | 2                  | 2.32               | 1                  | 1                  | 0              | 0              | 0              | 0                  | 0                  |
| 6324343   | ACC1    | 28                 | 64                 | 15.18              | 28                 | 64                 | 13.57              | 23                 | 40                 | 3.72           | 8              | 46             | 3.00               | 5                  |
| 6319434   | APL3    | 0                  | 0                  | 0                  | 0                  | 0                  | 0                  | 0                  | 0                  | 0              | 0              | 0              | 0                  | 0                  |
| 398364593 | MET6    | 0                  | 0                  | 0                  | 0                  | 0                  | 0                  | 0                  | 0                  | 0              | 0              | 0              | 0                  | 0                  |
| 6323751   | YPK2    | 0                  | 0                  | 0                  | 0                  | 0                  | 0                  | 0                  | 0                  | 1.92           | 1              | 1              | 0                  | 0                  |
| 330443495 | AIM6    | 2                  | 2                  | 5.90               | 2                  | 2                  | 0                  | 0                  | 0                  | 0              | 0              | 0              | 0                  | 0                  |
| 6323752   | PGM2    | 0                  | 0                  | 0                  | 0                  | 0                  | 0                  | 0                  | 0                  | 0              | 0              | 0              | 0                  | 0                  |
| 82795256  | SEC28   | 1                  | 1                  | 3.38               | 1                  | 1                  | 8.78               | 2                  | 3                  | 0              | 0              | 0              | 0                  | 0                  |
| 6322215   | YIR024C | 0                  | 0                  | 0                  | 0                  | 0                  | 0                  | 0                  | 0                  | 0              | 0              | 0              | 0                  | 0                  |
| 6323291   | YPT6    | 3                  | 8                  | 16.28              | 3                  | 8                  | 5.12               | 1                  | 18                 | 0              | 0              | 0              | 0                  | 0                  |
| 6321632   | PDX1    | 1                  | 1                  | 3.66               | 1                  | 1                  | 0                  | 0                  | 0                  | 3.66           | 1              | 2              | 0                  | 0                  |

Table S1 - Smith-Kinnaman, *et al* (2014) Abbreviations: %SC = percent sequence coverage, UP = unique peptides, PSM = peptide spectrum matches

| Accession | Acronym | UP                 | # PSM              | %SC                | UP                 | # PSM              | %SC                | UP                 | # PSM              | %SC            | UP             | # PSM          | %SC               | UP                |
|-----------|---------|--------------------|--------------------|--------------------|--------------------|--------------------|--------------------|--------------------|--------------------|----------------|----------------|----------------|-------------------|-------------------|
|           |         | BY4741_F<br>LAG_J1 | BY4741_F<br>LAG_J1 | BY4741_FL<br>AG_J2 | BY4741_F<br>LAG_J2 | BY4741_F<br>LAG_J2 | BY4741_FL<br>AG_J3 | BY4741_F<br>LAG_J3 | BY4741_F<br>LAG_J3 | V5_Rtr1_<br>WT | V5_Rtr1_<br>WT | V5_Rtr1_<br>WT | TAP_Rtr1<br>_WT_1 | TAP_Rtr1<br>_WT_1 |
| 398365005 | RIX1    | 0                  | 0                  | 0                  | 0                  | 0                  | 0                  | 0                  | 0                  | 0              | 0              | 0              | 0                 | 0                 |
| 6323975   | YMR315  | 3                  | 3                  | 8.31               | 3                  | 3                  | 0                  | 0                  | 0                  | 0              | 0              | 0              | 2.01              | 1                 |
| 6323740   | UTP15   | 2                  | 2                  | 5.46               | 2                  | 2                  | 11.70              | 4                  | 4                  | 0              | 0              | 0              | 0                 | 0                 |
| 6322743   | AAT1    | 0                  | 0                  | 0                  | 0                  | 0                  | 0                  | 0                  | 0                  | 0              | 0              | 0              | 0                 | 0                 |
| 6323033   | SSL1    | 0                  | 0                  | 0                  | 0                  | 0                  | 0                  | 0                  | 0                  | 0              | 0              | 0              | 0                 | 0                 |
| 398365521 | SWT1    | 0                  | 0                  | 0                  | 0                  | 0                  | 0                  | 0                  | 0                  | 0              | 0              | 0              | 0                 | 0                 |
| 398365403 | NUP133  | 3                  | 3                  | 3.11               | 3                  | 3                  | 1.38               | 1                  | 1                  | 1.04           | 1              | 2              | 0                 | 0                 |
| 6319276   | CDC24   | 0                  | 0                  | 0                  | 0                  | 0                  | 0                  | 0                  | 0                  | 3.04           | 2              | 5              | 0                 | 0                 |
| 6323251   | UTP13   | 4                  | 4                  | 7.34               | 4                  | 4                  | 15.79              | 9                  | 23                 | 2.94           | 2              | 6              | 0                 | 0                 |
| 6321913   | LSM12   | 0                  | 0                  | 0                  | 0                  | 0                  | 0                  | 0                  | 0                  | 0              | 0              | 0              | 17.11             | 2                 |
| 6322257   | RCY1    | 1                  | 3                  | 1.07               | 1                  | 3                  | 1.43               | 1                  | 1                  | 0              | 0              | 0              | 0                 | 0                 |
| 6319900   | RSC6    | 0                  | 0                  | 0                  | 0                  | 0                  | 0                  | 0                  | 0                  | 0              | 0              | 0              | 0                 | 0                 |
| 398364743 | IRC2    | 5                  | 7                  | 21.29              | 5                  | 7                  | 0                  | 0                  | 0                  | 7.60           | 2              | 3              | 0                 | 0                 |
| 6320070   | CDC53   | 0                  | 0                  | 0                  | 0                  | 0                  | 0                  | 0                  | 0                  | 1.10           | 1              | 3              | 1.84              | 1                 |
| 398364601 | NFU1    | 1                  | 1                  | 4.69               | 1                  | 1                  | 17.97              | 4                  | 8                  | 0              | 0              | 0              | 0                 | 0                 |
| 6323229   | YKE2    | 0                  | 0                  | 0                  | 0                  | 0                  | 0                  | 0                  | 0                  | 0              | 0              | 0              | 14.91             | 1                 |
| 6322154   | CKA1    | 0                  | 0                  | 0                  | 0                  | 0                  | 2.42               | 1                  | 1                  | 0              | 0              | 0              | 0                 | 0                 |
| 6323687   | IOC4    | 0                  | 0                  | 0                  | 0                  | 0                  | 0                  | 0                  | 0                  | 0              | 0              | 0              | 0                 | 0                 |
| 6325372   | RGC1    | 0                  | 0                  | 0                  | 0                  | 0                  | 0                  | 0                  | 0                  | 0              | 0              | 0              | 0                 | 0                 |
| 6325234   | MET12   | 2                  | 2                  | 3.65               | 2                  | 2                  | 2.28               | 1                  | 1                  | 1.67           | 1              | 1              | 0                 | 0                 |
| 10383790  | RHB1    | 0                  | 0                  | 0                  | 0                  | 0                  | 0                  | 0                  | 0                  | 5.26           | 1              | 2              | 0                 | 0                 |
| 10383792  | SYP1    | 4                  | 5                  | 4.83               | 4                  | 5                  | 0                  | 0                  | 0                  | 0              | 0              | 0              | 8.05              | 4                 |
| 398365079 | SEC9    | 0                  | 0                  | 0                  | 0                  | 0                  | 0                  | 0                  | 0                  | 0              | 0              | 0              | 0                 | 0                 |
| 398365907 | APM3    | 1                  | 1                  | 2.28               | 1                  | 1                  | 0                  | 0                  | 0                  | 0              | 0              | 0              | 0                 | 0                 |
| 6322783   | YNK1    | 1                  | 1                  | 7.84               | 1                  | 1                  | 18.95              | 2                  | 6                  | 0              | 0              | 0              | 0                 | 0                 |
| 6324470   | TPT1    | 0                  | 0                  | 0                  | 0                  | 0                  | 0                  | 0                  | 0                  | 0              | 0              | 0              | 0                 | 0                 |
| 6321843   | CIC1    | 2                  | 2                  | 5.59               | 2                  | 2                  | 3.46               | 1                  | 1                  | 0              | 0              | 0              | 0                 | 0                 |
| 6319298   | CCR4    | 3                  | 3                  | 4.78               | 3                  | 3                  | 1.91               | 1                  | 1                  | 2.75           | 2              | 7              | 0                 | 0                 |
| 6321257   | GTS1    | 1                  | 3                  | 3.28               | 1                  | 3                  | 4.04               | 1                  | 1                  | 0              | 0              | 0              | 0                 | 0                 |
| 6321341   | SRM1    | 2                  | 2                  | 4.15               | 2                  | 2                  | 0                  | 0                  | 0                  | 0              | 0              | 0              | 0                 | 0                 |
| 398365245 | PFY1    | 1                  | 1                  | 7.94               | 1                  | 1                  | 7.94               | 1                  | 1                  | 0              | 0              | 0              | 0                 | 0                 |
| 6324375   | FPK1    | 0                  | 0                  | 0                  | 0                  | 0                  | 0                  | 0                  | 0                  | 0              | 0              | 0              | 0                 | 0                 |
| 398364253 | AYR1    | 1                  | 1                  | 3.37               | 1                  | 1                  | 0                  | 0                  | 0                  | 2.69           | 1              | 1              | 0                 | 0                 |
| 398365397 | YGR054W | 1                  | 1                  | 2.34               | 1                  | 1                  | 3.58               | 2                  | 2                  | 1.87           | 1              | 3              | 0                 | 0                 |
| 398365527 | RLP7    | 1                  | 1                  | 4.04               | 1                  | 1                  | 4.04               | 1                  | 2                  | 11.18          | 3              | 22             | 0                 | 0                 |
| 6319976   | SHS1    | 2                  | 3                  | 3.63               | 2                  | 3                  | 4.17               | 2                  | 2                  | 0              | 0              | 0              | 0                 | 0                 |
| 398364769 | RSP5    | 5                  | 7                  | 7.66               | 5                  | 7                  | 5.93               | 3                  | 4                  | 0              | 0              | 0              | 0                 | 0                 |















Table S1 - Smith-Kinnaman, *et al* (2014) Abbreviations: %SC = percent sequence coverage, UP = unique peptides, PSM = peptide spectrum matches

| Accession | Acronym  | UP                 | # PSM              | %SC                | UP                 | # PSM              | %SC                | UP                 | # PSM              | %SC            | UP             | # PSM          | %SC               | UP                |
|-----------|----------|--------------------|--------------------|--------------------|--------------------|--------------------|--------------------|--------------------|--------------------|----------------|----------------|----------------|-------------------|-------------------|
|           |          | BY4741_F<br>LAG_J1 | BY4741_F<br>LAG_J1 | BY4741_FL<br>AG_J2 | BY4741_F<br>LAG_J2 | BY4741_F<br>LAG_J2 | BY4741_FL<br>AG_J3 | BY4741_F<br>LAG_J3 | BY4741_F<br>LAG_J3 | V5_Rtr1_<br>WT | V5_Rtr1_<br>WT | V5_Rtr1_<br>WT | TAP_Rtr1<br>_WT_1 | TAP_Rtr1<br>_WT_1 |
| 14318538  | YFR016C  | 0                  | 0                  | 0                  | 0                  | 0                  | 0                  | 0                  | 0                  | 0              | 0              | 0              | 0                 | 0                 |
| 6321647   | SER2     | 0                  | 0                  | 0                  | 0                  | 0                  | 0                  | 0                  | 0                  | 0              | 0              | 0              | 0                 | 0                 |
| 398365769 | SHG1     | 0                  | 0                  | 0                  | 0                  | 0                  | 0                  | 0                  | 0                  | 0              | 0              | 0              | 0                 | 0                 |
| 6321009   | SPT2     | 0                  | 0                  | 0                  | 0                  | 0                  | 0                  | 0                  | 0                  | 0              | 0              | 0              | 0                 | 0                 |
| 398365509 | RRP1     | 3                  | 3                  | 10.43              | 3                  | 3                  | 3.60               | 1                  | 1                  | 2.88           | 1              | 1              | 0                 | 0                 |
| 6323756   | MYO5     | 4                  | 4                  | 4.10               | 4                  | 4                  | 0                  | 0                  | 0                  | 2.05           | 2              | 2              | 0                 | 0                 |
| 6324839   | RBL2     | 0                  | 0                  | 0                  | 0                  | 0                  | 23.58              | 2                  | 2                  | 0              | 0              | 0              | 0                 | 0                 |
| 6319685   | DUR1,2   | 0                  | 0                  | 0                  | 0                  | 0                  | 0.76               | 1                  | 1                  | 0              | 0              | 0              | 0.76              | 1                 |
| 6325273   | TIF6     | 2                  | 3                  | 11.43              | 2                  | 3                  | 12.65              | 2                  | 4                  | 0              | 0              | 0              | 0                 | 0                 |
| 6324938   | PRE10    | 0                  | 0                  | 0                  | 0                  | 0                  | 0                  | 0                  | 0                  | 0              | 0              | 0              | 0                 | 0                 |
| 6324996   | APM1     | 0                  | 0                  | 0                  | 0                  | 0                  | 0                  | 0                  | 0                  | 0              | 0              | 0              | 0                 | 0                 |
| 6324522   | GAL11    | 0                  | 0                  | 0                  | 0                  | 0                  | 0                  | 0                  | 0                  | 0              | 0              | 0              | 1.02              | 1                 |
| 6324113   | RAP1     | 4                  | 8                  | 5.93               | 4                  | 8                  | 1.69               | 1                  | 1                  | 0              | 0              | 0              | 0                 | 0                 |
| 398366009 | YGR169C- | 0                  | 0                  | 0                  | 0                  | 0                  | 0                  | 0                  | 0                  | 0              | 0              | 0              | 0                 | 0                 |
| 6319564   | POL30    | 0                  | 0                  | 0                  | 0                  | 0                  | 0                  | 0                  | 0                  | 0              | 0              | 0              | 0                 | 0                 |
| 6323546   | UTP14    | 1                  | 1                  | 1.11               | 1                  | 1                  | 0                  | 0                  | 0                  | 0              | 0              | 0              | 0                 | 0                 |
| 6324312   | PUB1     | 2                  | 2                  | 3.75               | 2                  | 2                  | 4.86               | 2                  | 9                  | 0              | 0              | 0              | 0                 | 0                 |
| 6325286   | APL4     | 0                  | 0                  | 0                  | 0                  | 0                  | 0                  | 0                  | 0                  | 0              | 0              | 0              | 0                 | 0                 |
| 6323401   | SSQ1     | 0                  | 0                  | 0                  | 0                  | 0                  | 5.02               | 2                  | 3                  | 0              | 0              | 0              | 0                 | 0                 |
| 6324048   | HCH1     | 1                  | 2                  | 7.84               | 1                  | 2                  | 0                  | 0                  | 0                  | 0              | 0              | 0              | 0                 | 0                 |
| 6319627   | APD1     | 2                  | 2                  | 7.28               | 2                  | 2                  | 0                  | 0                  | 0                  | 0              | 0              | 0              | 0                 | 0                 |
| 6320102   | DUN1     | 1                  | 1                  | 1.75               | 1                  | 1                  | 0                  | 0                  | 0                  | 0              | 0              | 0              | 0                 | 0                 |
| 10383806  | SOL2     | 0                  | 0                  | 0                  | 0                  | 0                  | 0                  | 0                  | 0                  | 0              | 0              | 0              | 0                 | 0                 |
| 6320205   | YRB1     | 0                  | 0                  | 0                  | 0                  | 0                  | 14.93              | 2                  | 8                  | 5.47           | 1              | 1              | 0                 | 0                 |
| 398366613 | TOM1     | 4                  | 4                  | 1.32               | 4                  | 4                  | 0                  | 0                  | 0                  | 0.80           | 2              | 2              | 0                 | 0                 |
| 398365693 | TMA64    | 1                  | 1                  | 1.77               | 1                  | 1                  | 0                  | 0                  | 0                  | 0              | 0              | 0              | 0                 | 0                 |
| 6323893   | BCH1     | 1                  | 1                  | 1.24               | 1                  | 1                  | 0                  | 0                  | 0                  | 1.24           | 1              | 1              | 0                 | 0                 |
| 398366023 | YTM1     | 2                  | 2                  | 4.35               | 2                  | 2                  | 0                  | 0                  | 0                  | 4.57           | 2              | 3              | 0                 | 0                 |
| 6319437   | STU1     | 1                  | 1                  | 0.66               | 1                  | 1                  | 0                  | 0                  | 0                  | 0              | 0              | 0              | 0                 | 0                 |
| 398364833 | MET4     | 1                  | 1                  | 2.08               | 1                  | 1                  | 0                  | 0                  | 0                  | 0              | 0              | 0              | 0                 | 0                 |
| 6321424   | PUF4     | 0                  | 0                  | 0                  | 0                  | 0                  | 0                  | 0                  | 0                  | 0.90           | 1              | 3              | 0                 | 0                 |
| 6322411   | MTR4     | 8                  | 9                  | 10.16              | 8                  | 9                  | 1.49               | 1                  | 3                  | 0.84           | 1              | 1              | 0                 | 0                 |
| 14318501  | LPD1     | 6                  | 9                  | 17.03              | 6                  | 9                  | 16.43              | 5                  | 6                  | 0              | 0              | 0              | 0                 | 0                 |
| 6321890   | SFB3     | 1                  | 1                  | 0.86               | 1                  | 1                  | 1.94               | 1                  | 1                  | 0              | 0              | 0              | 0                 | 0                 |
| 398366661 | GIN4     | 1                  | 1                  | 1.31               | 1                  | 1                  | 0                  | 0                  | 0                  | 0              | 0              | 0              | 0                 | 0                 |
| 398365725 | SOL1     | 0                  | 0                  | 0                  | 0                  | 0                  | 0                  | 0                  | 0                  | 0              | 0              | 0              | 0                 | 0                 |
| 6323570   | DAK1     | 7                  | 20                 | 16.10              | 7                  | 20                 | 16.61              | 7                  | 15                 | 1.71           | 1              | 1              | 0                 | 0                 |



























Table S1 - Smith-Kinnaman, *et al* (2014) Abbreviations: %SC = percent sequence coverage, UP = unique peptides, PSM = peptide spectrum matches

| Accession | Acronym | UP                 | # PSM              | %SC                | UP                 | # PSM              | %SC                | UP                 | # PSM              | %SC            | UP             | # PSM          | %SC               | UP                |
|-----------|---------|--------------------|--------------------|--------------------|--------------------|--------------------|--------------------|--------------------|--------------------|----------------|----------------|----------------|-------------------|-------------------|
|           |         | BY4741_F<br>LAG_J1 | BY4741_F<br>LAG_J1 | BY4741_FL<br>AG_J2 | BY4741_F<br>LAG_J2 | BY4741_F<br>LAG_J2 | BY4741_FL<br>AG_J3 | BY4741_F<br>LAG_J3 | BY4741_F<br>LAG_J3 | V5_Rtr1_<br>WT | V5_Rtr1_<br>WT | V5_Rtr1_<br>WT | TAP_Rtr1<br>_WT_1 | TAP_Rtr1<br>_WT_1 |
| 398364717 | OLE1    | 0                  | 0                  | 0                  | 0                  | 0                  | 2.35               | 1                  | 1                  | 0              | 0              | 0              | 0                 | 0                 |
| 398364715 | OST1    | 0                  | 0                  | 0                  | 0                  | 0                  | 0                  | 0                  | 0                  | 0              | 0              | 0              | 0                 | 0                 |
| 6320639   | CYM1    | 0                  | 0                  | 0                  | 0                  | 0                  | 0                  | 0                  | 0                  | 1.01           | 1              | 1              | 0                 | 0                 |
| 6324109   | ADE12   | 6                  | 22                 | 18.01              | 6                  | 22                 | 7.39               | 2                  | 5                  | 0              | 0              | 0              | 0                 | 0                 |
| 330443698 | CHS1    | 0                  | 0                  | 0                  | 0                  | 0                  | 0                  | 0                  | 0                  | 0              | 0              | 0              | 0                 | 0                 |
| 398365123 | AQR1    | 0                  | 0                  | 0                  | 0                  | 0                  | 0                  | 0                  | 0                  | 0              | 0              | 0              | 0                 | 0                 |
| 6324745   | LCB4    | 3                  | 3                  | 7.37               | 3                  | 3                  | 0                  | 0                  | 0                  | 2.08           | 1              | 4              | 0                 | 0                 |
| 398366587 | RPN9    | 6                  | 8                  | 16.03              | 6                  | 8                  | 10.43              | 3                  | 9                  | 4.83           | 2              | 7              | 0                 | 0                 |
| 6320837   | MNN1    | 2                  | 2                  | 2.23               | 2                  | 2                  | 0                  | 0                  | 0                  | 0              | 0              | 0              | 0                 | 0                 |
| 6324594   | HSP10   | 3                  | 3                  | 34.91              | 3                  | 3                  | 65.09              | 6                  | 39                 | 0              | 0              | 0              | 0                 | 0                 |
| 6320859   | RPN3    | 8                  | 19                 | 19.31              | 8                  | 19                 | 7.27               | 3                  | 3                  | 3.63           | 2              | 2              | 0                 | 0                 |
| 398366611 | NHX1    | 0                  | 0                  | 0                  | 0                  | 0                  | 0                  | 0                  | 0                  | 0              | 0              | 0              | 0                 | 0                 |
| 6320395   | SLY1    | 5                  | 12                 | 10.06              | 5                  | 12                 | 4.05               | 2                  | 2                  | 1.50           | 1              | 14             | 2.10              | 1                 |
| 41629692  | YIP4    | 1                  | 1                  | 5.11               | 1                  | 1                  | 0                  | 0                  | 0                  | 0              | 0              | 0              | 0                 | 0                 |
| 330443374 | DRS2    | 1                  | 1                  | 0.74               | 1                  | 1                  | 0                  | 0                  | 0                  | 0              | 0              | 0              | 1.77              | 1                 |
| 6325207   | MNN9    | 1                  | 1                  | 2.53               | 1                  | 1                  | 0                  | 0                  | 0                  | 0              | 0              | 0              | 0                 | 0                 |
| 6323858   | ERG20   | 0                  | 0                  | 0                  | 0                  | 0                  | 0                  | 0                  | 0                  | 0              | 0              | 0              | 0                 | 0                 |
| 6319489   | MNN2    | 3                  | 3                  | 6.87               | 3                  | 3                  | 0                  | 0                  | 0                  | 0              | 0              | 0              | 0                 | 0                 |
| 6319726   | ARO4    | 3                  | 5                  | 9.46               | 3                  | 5                  | 11.08              | 3                  | 10                 | 0              | 0              | 0              | 0                 | 0                 |
| 398364279 | VAC8    | 2                  | 2                  | 4.67               | 2                  | 2                  | 4.67               | 2                  | 2                  | 2.94           | 2              | 6              | 0                 | 0                 |
| 6324555   | TLG2    | 2                  | 2                  | 5.04               | 2                  | 2                  | 0                  | 0                  | 0                  | 0              | 0              | 0              | 0                 | 0                 |
| 398366239 | GNT1    | 2                  | 20                 | 3.05               | 2                  | 20                 | 1.22               | 1                  | 1                  | 0              | 0              | 0              | 0                 | 0                 |
| 6322249   | OPT1    | 0                  | 0                  | 0                  | 0                  | 0                  | 0                  | 0                  | 0                  | 0              | 0              | 0              | 0                 | 0                 |
| 6319454   | PEP1    | 14                 | 17                 | 11.15              | 14                 | 17                 | 4.12               | 5                  | 6                  | 1.14           | 2              | 3              | 0                 | 0                 |
| 6322787   | YKL063C | 0                  | 0                  | 0                  | 0                  | 0                  | 0                  | 0                  | 0                  | 0              | 0              | 0              | 0                 | 0                 |
| 6324645   | NRT1    | 0                  | 0                  | 0                  | 0                  | 0                  | 0                  | 0                  | 0                  | 0              | 0              | 0              | 0                 | 0                 |
| 6323270   | YLR241W | 1                  | 1                  | 1.28               | 1                  | 1                  | 0                  | 0                  | 0                  | 0              | 0              | 0              | 0                 | 0                 |
| 14318577  | RPN12   | 6                  | 12                 | 31.39              | 6                  | 12                 | 31.39              | 8                  | 16                 | 8.03           | 1              | 2              | 0                 | 0                 |
| 6324061   | LYP1    | 0                  | 0                  | 2.29               | 1                  | 1                  | 0                  | 0                  | 0                  | 0              | 0              | 0              | 0                 | 0                 |
| 6320993   | FTR1    | 0                  | 0                  | 0                  | 0                  | 0                  | 0                  | 0                  | 0                  | 0              | 0              | 0              | 0                 | 0                 |
| 6320705   | ITR1    | 0                  | 0                  | 0                  | 0                  | 0                  | 0                  | 0                  | 0                  | 0              | 0              | 0              | 0                 | 0                 |
| 6319319   | ERP1    | 2                  | 4                  | 9.59               | 2                  | 4                  | 0                  | 0                  | 0                  | 0              | 0              | 0              | 0                 | 0                 |
| 6324828   | SEC63   | 2                  | 2                  | 3.02               | 2                  | 2                  | 4.98               | 2                  | 2                  | 7.24           | 5              | 10             | 0                 | 0                 |
| 6319429   | FUI1    | 0                  | 0                  | 0                  | 0                  | 0                  | 0                  | 0                  | 0                  | 0              | 0              | 0              | 0                 | 0                 |
| 6325293   | VMA13   | 9                  | 17                 | 22.38              | 9                  | 17                 | 10.67              | 4                  | 4                  | 2.72           | 1              | 8              | 0                 | 0                 |
| 10383762  | RNQ1    | 1                  | 1                  | 4.20               | 1                  | 1                  | 4.20               | 1                  | 1                  | 2.22           | 1              | 23             | 0                 | 0                 |
| 6320691   | KRE2    | 4                  | 4                  | 10.41              | 4                  | 4                  | 0                  | 0                  | 0                  | 5.20           | 1              | 1              | 0                 | 0                 |

Table S1 - Smith-Kinnaman, *et al* (2014) Abbreviations: %SC = percent sequence coverage, UP = unique peptides, PSM = peptide spectrum matches

| Accession | Acronym | UP                 | # PSM              | %SC                | UP                 | # PSM              | %SC                | UP                 | # PSM              | %SC            | UP             | # PSM          | %SC               | UP                |
|-----------|---------|--------------------|--------------------|--------------------|--------------------|--------------------|--------------------|--------------------|--------------------|----------------|----------------|----------------|-------------------|-------------------|
|           |         | BY4741_F<br>LAG_J1 | BY4741_F<br>LAG_J1 | BY4741_FL<br>AG_J2 | BY4741_F<br>LAG_J2 | BY4741_F<br>LAG_J2 | BY4741_FL<br>AG_J3 | BY4741_F<br>LAG_J3 | BY4741_F<br>LAG_J3 | V5_Rtr1_<br>WT | V5_Rtr1_<br>WT | V5_Rtr1_<br>WT | TAP_Rtr1<br>_WT_1 | TAP_Rtr1<br>_WT_1 |
| 6323630   | ERV25   | 0                  | 0                  | 0                  | 0                  | 0                  | 0                  | 0                  | 0                  | 0              | 0              | 0              | 0                 | 0                 |
| 6323716   | TVP18   | 0                  | 0                  | 0                  | 0                  | 0                  | 0                  | 0                  | 0                  | 0              | 0              | 0              | 0                 | 0                 |
| 6319289   | SNC1    | 0                  | 0                  | 0                  | 0                  | 0                  | 0                  | 0                  | 0                  | 0              | 0              | 0              | 0                 | 0                 |
| 398364281 | EMP24   | 1                  | 1                  | 6.90               | 1                  | 1                  | 6.90               | 1                  | 1                  | 0              | 0              | 0              | 0                 | 0                 |
| 6320298   | DNF2    | 3                  | 3                  | 2.30               | 3                  | 3                  | 0                  | 0                  | 0                  | 0              | 0              | 0              | 0                 | 0                 |
| 330443597 | MNN5    | 3                  | 5                  | 6.48               | 3                  | 5                  | 0                  | 0                  | 0                  | 0              | 0              | 0              | 0                 | 0                 |
| 6320897   | FCY2    | 1                  | 1                  | 1.69               | 1                  | 1                  | 0                  | 0                  | 0                  | 0              | 0              | 0              | 0                 | 0                 |
| 330443542 | SAP155  | 3                  | 3                  | 2.99               | 3                  | 3                  | 0                  | 0                  | 0                  | 0              | 0              | 0              | 0                 | 0                 |
| 14318521  | SPB4    | 0                  | 0                  | 0                  | 0                  | 0                  | 0                  | 0                  | 0                  | 0              | 0              | 0              | 0                 | 0                 |
| 6323367   | NUP2    | 0                  | 0                  | 0                  | 0                  | 0                  | 8.47               | 3                  | 4                  | 0              | 0              | 0              | 0                 | 0                 |
| 6319303   | TPD3    | 2                  | 3                  | 4.57               | 2                  | 3                  | 4.72               | 3                  | 4                  | 0              | 0              | 0              | 0                 | 0                 |
| 6324166   | RIA1    | 1                  | 1                  | 0.99               | 1                  | 1                  | 0                  | 0                  | 0                  | 1.17           | 1              | 2              | 0                 | 0                 |
| 398364557 | AIM21   | 0                  | 0                  | 0                  | 0                  | 0                  | 2.50               | 1                  | 3                  | 0              | 0              | 0              | 0                 | 0                 |
| 6322369   | SRS2    | 1                  | 1                  | 0.68               | 1                  | 1                  | 0.68               | 1                  | 1                  | 0              | 0              | 0              | 0                 | 0                 |
| 6324088   | ZWF1    | 1                  | 1                  | 3.37               | 1                  | 1                  | 0                  | 0                  | 0                  | 0              | 0              | 0              | 0                 | 0                 |
| 6319890   | TAF2    | 1                  | 1                  | 0.57               | 1                  | 1                  | 0                  | 0                  | 0                  | 0              | 0              | 0              | 0                 | 0                 |
| 6320033   | SFA1    | 0                  | 0                  | 0                  | 0                  | 0                  | 0                  | 0                  | 0                  | 0              | 0              | 0              | 0                 | 0                 |
| 6325429   | BSP1    | 0                  | 0                  | 0                  | 0                  | 0                  | 0                  | 0                  | 0                  | 0              | 0              | 0              | 0                 | 0                 |
| 6323022   | YLL007C | 0                  | 0                  | 0                  | 0                  | 0                  | 0                  | 0                  | 0                  | 0              | 0              | 0              | 0                 | 0                 |
| 6324918   | YOR342C | 0                  | 0                  | 0                  | 0                  | 0                  | 0                  | 0                  | 0                  | 0              | 0              | 0              | 0                 | 0                 |
| 6320091   | TRM3    | 1                  | 1                  | 0.63               | 1                  | 1                  | 0                  | 0                  | 0                  | 0.77           | 1              | 3              | 0                 | 0                 |
| 6322925   | SIS2    | 0                  | 0                  | 0                  | 0                  | 0                  | 0                  | 0                  | 0                  | 0              | 0              | 0              | 0                 | 0                 |
| 6321999   | SCH9    | 0                  | 0                  | 0                  | 0                  | 0                  | 0                  | 0                  | 0                  | 4.25           | 3              | 17             | 0                 | 0                 |
| 6320106   | RPN6    | 9                  | 13                 | 25.58              | 9                  | 13                 | 2.30               | 1                  | 4                  | 1.84           | 1              | 2              | 0                 | 0                 |
| 6320934   | PTC2    | 4                  | 4                  | 10.13              | 4                  | 4                  | 4.31               | 2                  | 3                  | 0              | 0              | 0              | 0                 | 0                 |
| 6322545   | STE18   | 1                  | 1                  | 15.45              | 1                  | 1                  | 0                  | 0                  | 0                  | 0              | 0              | 0              | 0                 | 0                 |
| 27808714  | LAP3    | 1                  | 1                  | 3.08               | 1                  | 1                  | 0                  | 0                  | 0                  | 0              | 0              | 0              | 0                 | 0                 |
| 6322410   | IRC8    | 0                  | 0                  | 0                  | 0                  | 0                  | 0                  | 0                  | 0                  | 0              | 0              | 0              | 0                 | 0                 |
| 14318532  | UBP6    | 7                  | 9                  | 17.03              | 7                  | 9                  | 9.02               | 3                  | 5                  | 2.61           | 1              | 11             | 0                 | 0                 |
| 6320129   | BRE1    | 0                  | 0                  | 0                  | 0                  | 0                  | 0                  | 0                  | 0                  | 0              | 0              | 0              | 0                 | 0                 |
| 6324287   | COG6    | 0                  | 0                  | 0                  | 0                  | 0                  | 0                  | 0                  | 0                  | 0              | 0              | 0              | 0                 | 0                 |
| 6320846   | NTF2    | 1                  | 1                  | 12.80              | 1                  | 1                  | 12.80              | 1                  | 1                  | 0              | 0              | 0              | 0                 | 0                 |
| 6324508   | MET22   | 0                  | 0                  | 0                  | 0                  | 0                  | 0                  | 0                  | 0                  | 0              | 0              | 0              | 0                 | 0                 |
| 6319975   | GCS1    | 13                 | 55                 | 53.69              | 13                 | 55                 | 55.97              | 17                 | 78                 | 0              | 0              | 0              | 0                 | 0                 |
| 63535562  | CHA1    | 2                  | 2                  | 6.67               | 2                  | 2                  | 1.94               | 1                  | 1                  | 0              | 0              | 0              | 0                 | 0                 |
| 6322141   | NEO1    | 1                  | 1                  | 1.56               | 1                  | 1                  | 0                  | 0                  | 0                  | 0              | 0              | 0              | 0                 | 0                 |
| 398365175 | CDC28   | 3                  | 4                  | 11.07              | 3                  | 4                  | 3.69               | 1                  | 1                  | 11.41          | 3              | 7              | 0                 | 0                 |

























Table S1 - Smith-Kinnaman, *et al* (2014) Abbreviations: %SC = percent sequence coverage, UP = unique peptides, PSM = peptide spectrum matches

| Accession | Acronym | UP                 | # PSM              | %SC                | UP                 | # PSM              | %SC                | UP                 | # PSM              | %SC            | UP             | # PSM          | %SC               | UP                |
|-----------|---------|--------------------|--------------------|--------------------|--------------------|--------------------|--------------------|--------------------|--------------------|----------------|----------------|----------------|-------------------|-------------------|
|           |         | BY4741_F<br>LAG_J1 | BY4741_F<br>LAG_J1 | BY4741_FL<br>AG_J2 | BY4741_F<br>LAG_J2 | BY4741_F<br>LAG_J2 | BY4741_FL<br>AG_J3 | BY4741_F<br>LAG_J3 | BY4741_F<br>LAG_J3 | V5_Rtr1_<br>WT | V5_Rtr1_<br>WT | V5_Rtr1_<br>WT | TAP_Rtr1<br>_WT_1 | TAP_Rtr1<br>_WT_1 |
| 6322378   | TAX4    | 0                  | 0                  | 0                  | 0                  | 0                  | 0                  | 0                  | 0                  | 0              | 0              | 0              | 0                 | 0                 |
| 6320848   | TIR1    | 0                  | 0                  | 0                  | 0                  | 0                  | 0                  | 0                  | 0                  | 0              | 0              | 0              | 0                 | 0                 |
| 6320093   | TMA17   | 0                  | 0                  | 0                  | 0                  | 0                  | 0                  | 0                  | 0                  | 0              | 0              | 0              | 0                 | 0                 |
| 6322332   | TRK1    | 0                  | 0                  | 0                  | 0                  | 0                  | 0                  | 0                  | 0                  | 0              | 0              | 0              | 0                 | 0                 |
| 6320738   | QCR7    | 0                  | 0                  | 0                  | 0                  | 0                  | 0                  | 0                  | 0                  | 0              | 0              | 0              | 0                 | 0                 |
| 6321543   | VOA1    | 0                  | 0                  | 0                  | 0                  | 0                  | 0                  | 0                  | 0                  | 0              | 0              | 0              | 0                 | 0                 |
| 41629668  | VPS8    | 0                  | 0                  | 0                  | 0                  | 0                  | 0                  | 0                  | 0                  | 0              | 0              | 0              | 0                 | 0                 |
| 6323150   | YPS3    | 0                  | 0                  | 0                  | 0                  | 0                  | 0                  | 0                  | 0                  | 0              | 0              | 0              | 0                 | 0                 |
| 398365307 | EHT1    | 7                  | 10                 | 18.18              | 7                  | 10                 | 21.06              | 7                  | 10                 | 2.00           | 1              | 1              | 0                 | 0                 |
| 6322739   | KTI12   | 5                  | 9                  | 19.17              | 5                  | 9                  | 3.51               | 1                  | 1                  | 3.51           | 1              | 1              | 0                 | 0                 |
| 398366117 | ELP2    | 4                  | 6                  | 6.22               | 4                  | 6                  | 5.46               | 3                  | 6                  | 1.27           | 1              | 1              | 0                 | 0                 |
| 6324932   | CIR2    | 3                  | 4                  | 5.86               | 3                  | 4                  | 1.43               | 1                  | 1                  | 1.43           | 1              | 1              | 0                 | 0                 |
| 6323129   | ERG27   | 2                  | 2                  | 8.36               | 2                  | 2                  | 4.61               | 1                  | 1                  | 2.59           | 1              | 1              | 0                 | 0                 |
| 6322737   | ABF1    | 2                  | 2                  | 3.83               | 2                  | 2                  | 3.69               | 2                  | 3                  | 1.50           | 1              | 1              | 0                 | 0                 |
| 6321278   | AIM14   | 0                  | 0                  | 0                  | 0                  | 0                  | 0                  | 0                  | 0                  | 1.23           | 1              | 1              | 0                 | 0                 |
| 398364589 | DSN1    | 0                  | 0                  | 0                  | 0                  | 0                  | 0                  | 0                  | 0                  | 1.39           | 1              | 1              | 0                 | 0                 |
| 6324870   | YOR296W | 0                  | 0                  | 0                  | 0                  | 0                  | 0                  | 0                  | 0                  | 0.78           | 1              | 1              | 0                 | 0                 |
| 398365441 | ISN1    | 0                  | 0                  | 0                  | 0                  | 0                  | 0                  | 0                  | 0                  | 2.00           | 1              | 1              | 0                 | 0                 |
| 6320409   | RAV2    | 0                  | 0                  | 0                  | 0                  | 0                  | 0                  | 0                  | 0                  | 3.99           | 1              | 1              | 0                 | 0                 |
| 398366501 | MRPS2   | 2                  | 3                  | 11.89              | 2                  | 3                  | 0                  | 0                  | 0                  | 3.15           | 1              | 2              | 0                 | 0                 |
| 398365469 | RPL40B  | 0                  | 0                  | 0                  | 0                  | 0                  | 0                  | 0                  | 0                  | 13.46          | 1              | 2              | 0                 | 0                 |
| 398364921 | TFC1    | 1                  | 1                  | 2.00               | 1                  | 1                  | 0                  | 0                  | 0                  | 1.23           | 1              | 2              | 0                 | 0                 |
| 6320130   | YDL073W | 0                  | 0                  | 0                  | 0                  | 0                  | 0                  | 0                  | 0                  | 0.81           | 1              | 2              | 0                 | 0                 |
| 6321209   | SHE10   | 4                  | 4                  | 7.11               | 4                  | 4                  | 2.08               | 1                  | 1                  | 3.81           | 2              | 3              | 0                 | 0                 |
| 6323662   | FMS1    | 1                  | 3                  | 2.76               | 1                  | 3                  | 0                  | 0                  | 0                  | 1.97           | 1              | 3              | 0                 | 0                 |
| 398365025 | KCS1    | 1                  | 1                  | 0.76               | 1                  | 1                  | 0                  | 0                  | 0                  | 0.86           | 1              | 3              | 0                 | 0                 |
| 398365489 | LST8    | 0                  | 0                  | 0                  | 0                  | 0                  | 0                  | 0                  | 0                  | 3.63           | 1              | 3              | 0                 | 0                 |
| 6322593   | XPT1    | 1                  | 4                  | 5.26               | 1                  | 4                  | 0                  | 0                  | 0                  | 5.26           | 1              | 4              | 0                 | 0                 |
| 398366545 | ARO10   | 9                  | 14                 | 15.28              | 9                  | 14                 | 4.88               | 3                  | 5                  | 2.52           | 2              | 5              | 0                 | 0                 |
| 398366635 | PHO8    | 1                  | 1                  | 1.77               | 1                  | 1                  | 0                  | 0                  | 0                  | 4.06           | 2              | 8              | 0                 | 0                 |
| 6321005   | COG3    | 0                  | 0                  | 0                  | 0                  | 0                  | 0                  | 0                  | 0                  | 1.37           | 1              | 1              | 0                 | 0                 |
| 398364553 | NBP35   | 1                  | 1                  | 3.05               | 1                  | 1                  | 0                  | 0                  | 0                  | 0              | 0              | 0              | 0                 | 0                 |
| 6323569   | COG8    | 0                  | 0                  | 0                  | 0                  | 0                  | 2.97               | 1                  | 1                  | 0              | 0              | 0              | 0                 | 0                 |
| 6322229   | GTT1    | 6                  | 13                 | 31.62              | 6                  | 13                 | 24.36              | 6                  | 16                 | 0              | 0              | 0              | 8.97              | 2                 |
| 398366485 | ASP1    | 5                  | 8                  | 14.96              | 5                  | 8                  | 7.87               | 2                  | 3                  | 0              | 0              | 0              | 0                 | 0                 |
| 398365871 | MGE1    | 4                  | 6                  | 17.54              | 4                  | 6                  | 10.53              | 3                  | 5                  | 0              | 0              | 0              | 0                 | 0                 |
| 6324690   | RPO31   | 3                  | 3                  | 3.08               | 3                  | 3                  | 1.99               | 2                  | 3                  | 0              | 0              | 0              | 0                 | 0                 |



Table S1 - Smith-Kinnaman, *et al* (2014) Abbreviations: %SC = percent sequence coverage, UP = unique peptides, PSM = peptide spectrum matches

| Accession | Acronym | UP                 | # PSM              | %SC                | UP                 | # PSM              | %SC                | UP                 | # PSM              | %SC            | UP             | # PSM          | %SC               | UP                |
|-----------|---------|--------------------|--------------------|--------------------|--------------------|--------------------|--------------------|--------------------|--------------------|----------------|----------------|----------------|-------------------|-------------------|
|           |         | BY4741_F<br>LAG_J1 | BY4741_F<br>LAG_J1 | BY4741_FL<br>AG_J2 | BY4741_F<br>LAG_J2 | BY4741_F<br>LAG_J2 | BY4741_FL<br>AG_J3 | BY4741_F<br>LAG_J3 | BY4741_F<br>LAG_J3 | V5_Rtr1_<br>WT | V5_Rtr1_<br>WT | V5_Rtr1_<br>WT | TAP_Rtr1<br>_WT_1 | TAP_Rtr1<br>_WT_1 |
| 6324946   | MRS6    | 1                  | 1                  | 2.32               | 1                  | 1                  | 0                  | 0                  | 0                  | 0              | 0              | 0              | 0                 | 0                 |
| 6325052   | HRR25   | 1                  | 2                  | 1.82               | 1                  | 2                  | 0                  | 0                  | 0                  | 0              | 0              | 0              | 0                 | 0                 |
| 6324631   | SGT1    | 1                  | 1                  | 2.78               | 1                  | 1                  | 3.04               | 1                  | 1                  | 0              | 0              | 0              | 0                 | 0                 |
| 6323651   | ADI1    | 1                  | 2                  | 7.26               | 1                  | 2                  | 0                  | 0                  | 0                  | 0              | 0              | 0              | 0                 | 0                 |
| 398365629 | DBF2    | 0                  | 0                  | 0                  | 0                  | 0                  | 0                  | 0                  | 0                  | 0              | 0              | 0              | 0                 | 0                 |
| 6320725   | GRH1    | 0                  | 0                  | 0                  | 0                  | 0                  | 0                  | 0                  | 0                  | 0              | 0              | 0              | 0                 | 0                 |
| 6324056   | TOF1    | 1                  | 1                  | 1.05               | 1                  | 1                  | 0                  | 0                  | 0                  | 0              | 0              | 0              | 0                 | 0                 |
| 6321823   | PIH1    | 0                  | 0                  | 0                  | 0                  | 0                  | 0                  | 0                  | 0                  | 0              | 0              | 0              | 0                 | 0                 |
| 10383767  | KCC4    | 0                  | 0                  | 0                  | 0                  | 0                  | 0                  | 0                  | 0                  | 0              | 0              | 0              | 0                 | 0                 |
| 6319556   | UBC4    | 0                  | 0                  | 0                  | 0                  | 0                  | 0                  | 0                  | 0                  | 0              | 0              | 0              | 0                 | 0                 |
| 6325007   | GYP5    | 0                  | 0                  | 0                  | 0                  | 0                  | 0                  | 0                  | 0                  | 0              | 0              | 0              | 0                 | 0                 |
| 6322121   | SEC6    | 0                  | 0                  | 0                  | 0                  | 0                  | 0                  | 0                  | 0                  | 0              | 0              | 0              | 0                 | 0                 |
| 6323292   | TMA7    | 0                  | 0                  | 0                  | 0                  | 0                  | 0                  | 0                  | 0                  | 0              | 0              | 0              | 0                 | 0                 |
| 6325227   | TRM44   | 4                  | 5                  | 8.11               | 4                  | 5                  | 2.29               | 1                  | 1                  | 3.17           | 1              | 1              | 0                 | 0                 |
| 6322526   | TOR1    | 0                  | 0                  | 0                  | 0                  | 0                  | 0                  | 0                  | 0                  | 0.81           | 1              | 1              | 0                 | 0                 |
| 6324085   | SUI1    | 6                  | 28                 | 70.37              | 6                  | 28                 | 62.04              | 6                  | 30                 | 0              | 0              | 0              | 0                 | 0                 |
| 398366199 | IVY1    | 3                  | 3                  | 6.62               | 3                  | 3                  | 0                  | 0                  | 0                  | 0              | 0              | 0              | 0                 | 0                 |
| 6322839   | ARC19   | 2                  | 4                  | 14.04              | 2                  | 4                  | 9.36               | 1                  | 1                  | 0              | 0              | 0              | 0                 | 0                 |
| 6321914   | CIA2    | 1                  | 2                  | 5.19               | 1                  | 2                  | 0                  | 0                  | 0                  | 0              | 0              | 0              | 0                 | 0                 |
| 6319737   | RGD1    | 0                  | 0                  | 0                  | 0                  | 0                  | 0                  | 0                  | 0                  | 0              | 0              | 0              | 0                 | 0                 |
| 6322419   | MHP1    | 1                  | 1                  | 0.50               | 1                  | 1                  | 0                  | 0                  | 0                  | 0              | 0              | 0              | 0                 | 0                 |
| 398366245 | LDB19   | 0                  | 0                  | 0                  | 0                  | 0                  | 0                  | 0                  | 0                  | 0              | 0              | 0              | 0                 | 0                 |
| 6325011   | YPL245W | 0                  | 0                  | 0                  | 0                  | 0                  | 0                  | 0                  | 0                  | 0              | 0              | 0              | 0                 | 0                 |
| 398364697 | LSM4    | 2                  | 2                  | 10.70              | 2                  | 2                  | 14.44              | 3                  | 6                  | 8.56           | 2              | 3              | 0                 | 0                 |
| 6320840   | FMP52   | 4                  | 6                  | 18.61              | 4                  | 6                  | 12.55              | 2                  | 3                  | 0              | 0              | 0              | 30.74             | 5                 |
| 6324794   | RCN2    | 1                  | 1                  | 4.53               | 1                  | 1                  | 13.21              | 2                  | 3                  | 0              | 0              | 0              | 0                 | 0                 |
| 6321800   | VPS29   | 2                  | 2                  | 8.16               | 2                  | 2                  | 0                  | 0                  | 0                  | 0              | 0              | 0              | 0                 | 0                 |
| 398364967 | SOK1    | 0                  | 0                  | 0                  | 0                  | 0                  | 0                  | 0                  | 0                  | 0              | 0              | 0              | 0                 | 0                 |
| 6320413   | UME6    | 0                  | 0                  | 0                  | 0                  | 0                  | 0                  | 0                  | 0                  | 0              | 0              | 0              | 0                 | 0                 |
| 6322379   | IML2    | 1                  | 1                  | 1.23               | 1                  | 1                  | 0                  | 0                  | 0                  | 0              | 0              | 0              | 0                 | 0                 |
| 6325362   | COG4    | 0                  | 0                  | 0                  | 0                  | 0                  | 0                  | 0                  | 0                  | 2.90           | 2              | 2              | 0                 | 0                 |
| 6322156   | BCY1    | 5                  | 6                  | 11.06              | 5                  | 6                  | 16.83              | 6                  | 10                 | 0              | 0              | 0              | 0                 | 0                 |
| 6322424   | SNX4    | 1                  | 1                  | 3.78               | 1                  | 1                  | 0                  | 0                  | 0                  | 0              | 0              | 0              | 0                 | 0                 |
| 398365471 | MCM7    | 1                  | 1                  | 1.54               | 1                  | 1                  | 1.18               | 1                  | 1                  | 0              | 0              | 0              | 0                 | 0                 |
| 398365269 | SMY2    | 0                  | 0                  | 0                  | 0                  | 0                  | 2.43               | 1                  | 1                  | 3.24           | 1              | 1              | 0                 | 0                 |
| 6323616   | YML6    | 1                  | 1                  | 2.45               | 1                  | 1                  | 0                  | 0                  | 0                  | 0              | 0              | 0              | 0                 | 0                 |
| 6325343   | SUA7    | 2                  | 2                  | 8.70               | 2                  | 2                  | 4.93               | 1                  | 1                  | 2.90           | 1              | 1              | 0                 | 0                 |









Table S1 - Smith-Kinnaman, *et al* (2014) Abbreviations: %SC = percent sequence coverage, UP = unique peptides, PSM = peptide spectrum matches

| Accession | Acronym | UP                 | # PSM              | %SC                | UP                 | # PSM              | %SC                | UP                 | # PSM              | %SC            | UP             | # PSM          | %SC               | UP                |
|-----------|---------|--------------------|--------------------|--------------------|--------------------|--------------------|--------------------|--------------------|--------------------|----------------|----------------|----------------|-------------------|-------------------|
|           |         | BY4741_F<br>LAG_J1 | BY4741_F<br>LAG_J1 | BY4741_FL<br>AG_J2 | BY4741_F<br>LAG_J2 | BY4741_F<br>LAG_J2 | BY4741_FL<br>AG_J3 | BY4741_F<br>LAG_J3 | BY4741_F<br>LAG_J3 | V5_Rtr1_<br>WT | V5_Rtr1_<br>WT | V5_Rtr1_<br>WT | TAP_Rtr1<br>_WT_1 | TAP_Rtr1<br>_WT_1 |
| 10383809  | FIG2    | 0                  | 0                  | 0                  | 0                  | 0                  | 0                  | 0                  | 0                  | 0              | 0              | 0              | 0                 | 0                 |
| 6324293   | YNL035C | 0                  | 0                  | 0                  | 0                  | 0                  | 0                  | 0                  | 0                  | 0              | 0              | 0              | 0                 | 0                 |
| 398366365 | EFG1    | 3                  | 4                  | 19.74              | 3                  | 4                  | 6.44               | 1                  | 3                  | 6.87           | 1              | 2              | 0                 | 0                 |
| 6321235   | KEX1    | 0                  | 0                  | 0                  | 0                  | 0                  | 0                  | 0                  | 0                  | 1.37           | 1              | 6              | 0                 | 0                 |
| 6323606   | AMD1    | 6                  | 8                  | 8.40               | 6                  | 8                  | 7.04               | 3                  | 3                  | 0              | 0              | 0              | 0                 | 0                 |
| 398366153 | MBF1    | 2                  | 5                  | 17.88              | 2                  | 5                  | 7.95               | 1                  | 2                  | 0              | 0              | 0              | 9.93              | 1                 |
| 398364537 | VPS45   | 3                  | 4                  | 6.41               | 3                  | 4                  | 0                  | 0                  | 0                  | 3.64           | 2              | 5              | 0                 | 0                 |
| 6325326   | SPE3    | 1                  | 1                  | 4.44               | 1                  | 1                  | 7.17               | 2                  | 2                  | 0              | 0              | 0              | 4.44              | 1                 |
| 37362654  | RRP46   | 0                  | 0                  | 0                  | 0                  | 0                  | 0                  | 0                  | 0                  | 0              | 0              | 0              | 0                 | 0                 |
| 6324194   | FPR1    | 5                  | 20                 | 46.49              | 5                  | 20                 | 56.14              | 5                  | 21                 | 0              | 0              | 0              | 0                 | 0                 |
| 46562125  | VPS5    | 1                  | 1                  | 1.63               | 1                  | 1                  | 0                  | 0                  | 0                  | 1.33           | 1              | 5              | 0                 | 0                 |
| 6322759   | YKL091C | 3                  | 7                  | 10.32              | 3                  | 7                  | 5.81               | 2                  | 19                 | 0              | 0              | 0              | 0                 | 0                 |
| 37362671  | MIA40   | 2                  | 4                  | 9.68               | 2                  | 4                  | 6.95               | 2                  | 10                 | 0              | 0              | 0              | 3.97              | 1                 |
| 6320662   | GUK1    | 2                  | 6                  | 12.30              | 2                  | 6                  | 25.67              | 4                  | 12                 | 0              | 0              | 0              | 0                 | 0                 |
| 6324363   | ARC35   | 3                  | 3                  | 10.23              | 3                  | 3                  | 5.85               | 2                  | 4                  | 0              | 0              | 0              | 0                 | 0                 |
| 398366563 | HPT1    | 0                  | 0                  | 0                  | 0                  | 0                  | 0                  | 0                  | 0                  | 0              | 0              | 0              | 0                 | 0                 |
| 398366275 | LSC2    | 2                  | 2                  | 6.09               | 2                  | 2                  | 0                  | 0                  | 0                  | 0              | 0              | 0              | 0                 | 0                 |
| 6323739   | AIP1    | 0                  | 0                  | 0                  | 0                  | 0                  | 0                  | 0                  | 0                  | 0              | 0              | 0              | 0                 | 0                 |
| 6325215   | SSN3    | 0                  | 0                  | 0                  | 0                  | 0                  | 0                  | 0                  | 0                  | 0              | 0              | 0              | 0                 | 0                 |
| 6324378   | LYS9    | 0                  | 0                  | 0                  | 0                  | 0                  | 3.36               | 1                  | 1                  | 3.36           | 1              | 1              | 0                 | 0                 |
| 6324475   | WRS1    | 4                  | 8                  | 11.57              | 4                  | 8                  | 15.28              | 5                  | 8                  | 2.31           | 1              | 2              | 4.17              | 1                 |
| 6323279   | SSP120  | 0                  | 0                  | 0                  | 0                  | 0                  | 0                  | 0                  | 0                  | 5.13           | 1              | 4              | 0                 | 0                 |
| 6322992   | PRP19   | 5                  | 5                  | 12.52              | 5                  | 5                  | 4.37               | 2                  | 5                  | 0              | 0              | 0              | 0                 | 0                 |
| 330443401 | MAP2    | 2                  | 2                  | 6.89               | 2                  | 2                  | 3.09               | 1                  | 1                  | 0              | 0              | 0              | 0                 | 0                 |
| 6324564   | RCL1    | 0                  | 0                  | 0                  | 0                  | 0                  | 0                  | 0                  | 0                  | 0              | 0              | 0              | 0                 | 0                 |
| 6324379   | BRE5    | 0                  | 0                  | 0                  | 0                  | 0                  | 0                  | 0                  | 0                  | 0              | 0              | 0              | 0                 | 0                 |
| 6320849   | PRE10   | 0                  | 0                  | 0                  | 0                  | 0                  | 0                  | 0                  | 0                  | 0              | 0              | 0              | 0                 | 0                 |
| 6325173   | BRO1    | 1                  | 2                  | 1.30               | 1                  | 2                  | 4.38               | 3                  | 3                  | 1.54           | 1              | 1              | 0                 | 0                 |
| 398366247 | PHO81   | 0                  | 0                  | 0                  | 0                  | 0                  | 0                  | 0                  | 0                  | 0.85           | 1              | 4              | 0                 | 0                 |
| 6323007   | SPA2    | 6                  | 7                  | 4.64               | 6                  | 7                  | 6.68               | 6                  | 16                 | 0              | 0              | 0              | 0                 | 0                 |
| 6325447   | SKI3    | 1                  | 1                  | 0.77               | 1                  | 1                  | 0                  | 0                  | 0                  | 0              | 0              | 0              | 0                 | 0                 |
| 6323332   | HRI1    | 0                  | 0                  | 0                  | 0                  | 0                  | 0                  | 0                  | 0                  | 0              | 0              | 0              | 0                 | 0                 |
| 6324574   | RRP6    | 2                  | 2                  | 3.27               | 2                  | 2                  | 0                  | 0                  | 0                  | 0              | 0              | 0              | 0                 | 0                 |
| 6324031   | CLA4    | 0                  | 0                  | 0                  | 0                  | 0                  | 0                  | 0                  | 0                  | 0              | 0              | 0              | 0                 | 0                 |
| 398365831 | PRE9    | 4                  | 4                  | 17.83              | 4                  | 4                  | 0                  | 0                  | 0                  | 3.10           | 1              | 1              | 0                 | 0                 |
| 6323142   | HOG1    | 0                  | 0                  | 0                  | 0                  | 0                  | 0                  | 0                  | 0                  | 0              | 0              | 0              | 0                 | 0                 |
| 6324615   | CUE5    | 4                  | 4                  | 11.19              | 4                  | 4                  | 3.89               | 1                  | 3                  | 0              | 0              | 0              | 0                 | 0                 |

















Table S1 - Smith-Kinnaman, *et al* (2014) Abbreviations: %SC = percent sequence coverage, UP = unique peptides, PSM = peptide spectrum matches

| Accession | Acronym | UP                 | # PSM              | %SC                | UP                 | # PSM              | %SC                | UP                 | # PSM              | %SC            | UP             | # PSM          | %SC               | UP                |
|-----------|---------|--------------------|--------------------|--------------------|--------------------|--------------------|--------------------|--------------------|--------------------|----------------|----------------|----------------|-------------------|-------------------|
|           |         | BY4741_F<br>LAG_J1 | BY4741_F<br>LAG_J1 | BY4741_FL<br>AG_J2 | BY4741_F<br>LAG_J2 | BY4741_F<br>LAG_J2 | BY4741_FL<br>AG_J3 | BY4741_F<br>LAG_J3 | BY4741_F<br>LAG_J3 | V5_Rtr1_<br>WT | V5_Rtr1_<br>WT | V5_Rtr1_<br>WT | TAP_Rtr1<br>_WT_1 | TAP_Rtr1<br>_WT_1 |
| 6322153   | CST6    | 2                  | 3                  | 3.41               | 2                  | 3                  | 0                  | 0                  | 0                  | 1.36           | 1              | 1              | 5.28              | 1                 |
| 14318524  | NIC96   | 2                  | 3                  | 2.26               | 2                  | 3                  | 2.38               | 2                  | 2                  | 1.31           | 1              | 1              | 0                 | 0                 |
| 6324402   | AIF1    | 3                  | 4                  | 9.26               | 3                  | 4                  | 4.50               | 1                  | 2                  | 2.38           | 1              | 1              | 0                 | 0                 |
| 398364507 | DOT5    | 2                  | 2                  | 11.16              | 2                  | 2                  | 4.19               | 1                  | 2                  | 6.05           | 1              | 1              | 0                 | 0                 |
| 398365867 | ENT5    | 1                  | 1                  | 2.92               | 1                  | 1                  | 2.43               | 1                  | 1                  | 2.92           | 1              | 1              | 0                 | 0                 |
| 6324130   | GCR2    | 1                  | 1                  | 1.50               | 1                  | 1                  | 0                  | 0                  | 0                  | 2.25           | 1              | 1              | 5.24              | 1                 |
| 6323148   | SRN2    | 2                  | 2                  | 10.80              | 2                  | 2                  | 0                  | 0                  | 0                  | 6.57           | 1              | 1              | 0                 | 0                 |
| 6319738   | TAE1    | 1                  | 1                  | 4.74               | 1                  | 1                  | 0                  | 0                  | 0                  | 8.62           | 1              | 1              | 0                 | 0                 |
| 6324656   | WHI5    | 0                  | 0                  | 0                  | 0                  | 0                  | 0                  | 0                  | 0                  | 3.73           | 1              | 1              | 0                 | 0                 |
| 6324781   | RET1    | 0                  | 0                  | 0                  | 0                  | 0                  | 0                  | 0                  | 0                  | 0.78           | 1              | 1              | 0                 | 0                 |
| 37362668  | YJL016W | 0                  | 0                  | 0                  | 0                  | 0                  | 0                  | 0                  | 0                  | 1.43           | 1              | 1              | 0                 | 0                 |
| 6321609   | PSD2    | 0                  | 0                  | 0                  | 0                  | 0                  | 0                  | 0                  | 0                  | 2.11           | 1              | 1              | 0                 | 0                 |
| 6321481   | RME1    | 0                  | 0                  | 0                  | 0                  | 0                  | 0                  | 0                  | 0                  | 4.00           | 1              | 1              | 0                 | 0                 |
| 6325431   | VPS4    | 2                  | 2                  | 5.49               | 2                  | 2                  | 0                  | 0                  | 0                  | 1.83           | 1              | 2              | 0                 | 0                 |
| 6324854   | FSH3    | 1                  | 1                  | 4.14               | 1                  | 1                  | 0                  | 0                  | 0                  | 4.14           | 1              | 2              | 0                 | 0                 |
| 330443376 | MAK16   | 1                  | 1                  | 4.58               | 1                  | 1                  | 0                  | 0                  | 0                  | 2.61           | 1              | 2              | 0                 | 0                 |
| 6322690   | RCN1    | 0                  | 0                  | 0                  | 0                  | 0                  | 0                  | 0                  | 0                  | 6.16           | 1              | 3              | 0                 | 0                 |
| 6322431   | VPS53   | 0                  | 0                  | 0                  | 0                  | 0                  | 0                  | 0                  | 0                  | 1.22           | 1              | 3              | 0                 | 0                 |
| 6322631   | SRY1    | 3                  | 6                  | 14.11              | 3                  | 6                  | 4.60               | 1                  | 1                  | 3.37           | 1              | 5              | 0                 | 0                 |
| 6320580   | VPS74   | 6                  | 30                 | 23.48              | 6                  | 30                 | 26.96              | 7                  | 44                 | 0              | 0              | 0              | 0                 | 0                 |
| 9755336   | DID4    | 2                  | 7                  | 9.91               | 2                  | 7                  | 3.88               | 1                  | 1                  | 0              | 0              | 0              | 0                 | 0                 |
| 6323881   | YML44   | 1                  | 6                  | 11.22              | 1                  | 6                  | 16.33              | 1                  | 4                  | 0              | 0              | 0              | 0                 | 0                 |
| 398366509 | MRP1    | 4                  | 5                  | 16.20              | 4                  | 5                  | 4.36               | 1                  | 1                  | 0              | 0              | 0              | 0                 | 0                 |
| 6320035   | FAP7    | 3                  | 4                  | 18.27              | 3                  | 4                  | 12.18              | 2                  | 3                  | 0              | 0              | 0              | 0                 | 0                 |
| 6323354   | SFH1    | 1                  | 1                  | 3.05               | 1                  | 1                  | 3.05               | 1                  | 1                  | 0              | 0              | 0              | 0                 | 0                 |
| 6323531   | SEC65   | 2                  | 3                  | 8.06               | 2                  | 3                  | 8.79               | 2                  | 2                  | 0              | 0              | 0              | 0                 | 0                 |
| 6321433   | COG7    | 3                  | 3                  | 11.47              | 3                  | 3                  | 7.89               | 2                  | 2                  | 0              | 0              | 0              | 0                 | 0                 |
| 398364865 | PIB2    | 0                  | 0                  | 0                  | 0                  | 0                  | 0                  | 0                  | 0                  | 0              | 0              | 0              | 0                 | 0                 |
| 6320673   | RMT2    | 2                  | 2                  | 4.37               | 2                  | 2                  | 2.18               | 1                  | 1                  | 0              | 0              | 0              | 0                 | 0                 |
| 6323417   | SWC7    | 2                  | 2                  | 19.70              | 2                  | 2                  | 37.88              | 4                  | 5                  | 0              | 0              | 0              | 0                 | 0                 |
| 6324423   | DCP1    | 2                  | 2                  | 11.69              | 2                  | 2                  | 7.79               | 1                  | 1                  | 0              | 0              | 0              | 0                 | 0                 |
| 398365921 | TAF10   | 1                  | 1                  | 3.88               | 1                  | 1                  | 18.45              | 2                  | 2                  | 0              | 0              | 0              | 9.22              | 1                 |
| 6323712   | UBX4    | 1                  | 1                  | 3.13               | 1                  | 1                  | 0                  | 0                  | 0                  | 0              | 0              | 0              | 0                 | 0                 |
| 6325166   | GLR1    | 1                  | 2                  | 2.48               | 1                  | 2                  | 2.48               | 1                  | 1                  | 0              | 0              | 0              | 0                 | 0                 |
| 6320994   | LSM5    | 2                  | 2                  | 26.88              | 2                  | 2                  | 17.20              | 1                  | 3                  | 0              | 0              | 0              | 0                 | 0                 |
| 398366515 | TRP4    | 2                  | 2                  | 4.47               | 2                  | 2                  | 0                  | 0                  | 0                  | 0              | 0              | 0              | 0                 | 0                 |
| 6324551   | TSR4    | 1                  | 1                  | 4.17               | 1                  | 1                  | 8.33               | 2                  | 3                  | 0              | 0              | 0              | 0                 | 0                 |

Table S1 - Smith-Kinnaman, *et al* (2014) Abbreviations: %SC = percent sequence coverage, UP = unique peptides, PSM = peptide spectrum matches

| Accession | Acronym | UP                 | # PSM              | %SC                | UP                 | # PSM              | %SC                | UP                 | # PSM              | %SC            | UP             | # PSM          | %SC               | UP                |
|-----------|---------|--------------------|--------------------|--------------------|--------------------|--------------------|--------------------|--------------------|--------------------|----------------|----------------|----------------|-------------------|-------------------|
|           |         | BY4741_F<br>LAG_J1 | BY4741_F<br>LAG_J1 | BY4741_FL<br>AG_J2 | BY4741_F<br>LAG_J2 | BY4741_F<br>LAG_J2 | BY4741_FL<br>AG_J3 | BY4741_F<br>LAG_J3 | BY4741_F<br>LAG_J3 | V5_Rtr1_<br>WT | V5_Rtr1_<br>WT | V5_Rtr1_<br>WT | TAP_Rtr1<br>_WT_1 | TAP_Rtr1<br>_WT_1 |
| 6324068   | ORC5    | 0                  | 0                  | 0                  | 0                  | 0                  | 0                  | 0                  | 0                  | 0              | 0              | 0              | 0                 | 0                 |
| 6325213   | NOP4    | 2                  | 2                  | 2.48               | 2                  | 2                  | 2.48               | 1                  | 1                  | 0              | 0              | 0              | 0                 | 0                 |
| 6324041   | CAF40   | 0                  | 0                  | 0                  | 0                  | 0                  | 0                  | 0                  | 0                  | 0              | 0              | 0              | 0                 | 0                 |
| 6320086   | CYK3    | 0                  | 0                  | 0                  | 0                  | 0                  | 0                  | 0                  | 0                  | 0              | 0              | 0              | 0                 | 0                 |
| 6321762   | SNF6    | 0                  | 0                  | 0                  | 0                  | 0                  | 0                  | 0                  | 0                  | 0              | 0              | 0              | 0                 | 0                 |
| 398365087 | GRX4    | 0                  | 0                  | 0                  | 0                  | 0                  | 6.97               | 1                  | 1                  | 0              | 0              | 0              | 0                 | 0                 |
| 6323218   | ATG26   | 0                  | 0                  | 0                  | 0                  | 0                  | 0                  | 0                  | 0                  | 0              | 0              | 0              | 0                 | 0                 |
| 41629693  | PRP18   | 0                  | 0                  | 0                  | 0                  | 0                  | 0                  | 0                  | 0                  | 0              | 0              | 0              | 0                 | 0                 |
| 330443528 | PTP3    | 0                  | 0                  | 0                  | 0                  | 0                  | 0                  | 0                  | 0                  | 0              | 0              | 0              | 0                 | 0                 |
| 398364733 | YIR035C | 1                  | 1                  | 3.54               | 1                  | 1                  | 0                  | 0                  | 0                  | 0              | 0              | 0              | 0                 | 0                 |
| 6321766   | AIM17   | 0                  | 0                  | 0                  | 0                  | 0                  | 0                  | 0                  | 0                  | 0              | 0              | 0              | 0                 | 0                 |
| 14318483  | MOB2    | 0                  | 0                  | 0                  | 0                  | 0                  | 0                  | 0                  | 0                  | 0              | 0              | 0              | 0                 | 0                 |
| 6324527   | PSK2    | 0                  | 0                  | 0                  | 0                  | 0                  | 0                  | 0                  | 0                  | 0              | 0              | 0              | 0                 | 0                 |
| 398365421 | PRP16   | 0                  | 0                  | 0                  | 0                  | 0                  | 0.84               | 1                  | 1                  | 0              | 0              | 0              | 0                 | 0                 |
| 41629685  | RSC30   | 0                  | 0                  | 0                  | 0                  | 0                  | 0                  | 0                  | 0                  | 0              | 0              | 0              | 0                 | 0                 |
| 6320907   | VHR2    | 1                  | 1                  | 2.97               | 1                  | 1                  | 0                  | 0                  | 0                  | 0              | 0              | 0              | 0                 | 0                 |
| 398366405 | GCN2    | 0                  | 0                  | 0                  | 0                  | 0                  | 0                  | 0                  | 0                  | 0              | 0              | 0              | 0                 | 0                 |
| 398364549 | GYP6    | 0                  | 0                  | 0                  | 0                  | 0                  | 0                  | 0                  | 0                  | 0              | 0              | 0              | 0                 | 0                 |
| 330443696 | YNL193W | 0                  | 0                  | 0                  | 0                  | 0                  | 0                  | 0                  | 0                  | 0              | 0              | 0              | 0                 | 0                 |
| 6325243   | YPL014W | 0                  | 0                  | 0                  | 0                  | 0                  | 0                  | 0                  | 0                  | 0              | 0              | 0              | 0                 | 0                 |
| 6325327   | MED1    | 0                  | 0                  | 0                  | 0                  | 0                  | 0                  | 0                  | 0                  | 0              | 0              | 0              | 0                 | 0                 |
| 6320160   | MTF2    | 0                  | 0                  | 0                  | 0                  | 0                  | 0                  | 0                  | 0                  | 0              | 0              | 0              | 0                 | 0                 |
| 6319287   | PRP45   | 0                  | 0                  | 0                  | 0                  | 0                  | 0                  | 0                  | 0                  | 0              | 0              | 0              | 0                 | 0                 |
| 398365919 | SEC5    | 0                  | 0                  | 0                  | 0                  | 0                  | 0                  | 0                  | 0                  | 0              | 0              | 0              | 0                 | 0                 |
| 6320433   | SIR4    | 0                  | 0                  | 0                  | 0                  | 0                  | 0.59               | 1                  | 1                  | 0              | 0              | 0              | 0                 | 0                 |
| 6321725   | BIO2    | 0                  | 0                  | 0                  | 0                  | 0                  | 0                  | 0                  | 0                  | 0              | 0              | 0              | 0                 | 0                 |
| 6324177   | INN1    | 0                  | 0                  | 0                  | 0                  | 0                  | 0                  | 0                  | 0                  | 0              | 0              | 0              | 0                 | 0                 |
| 6319534   | ORC2    | 0                  | 0                  | 0                  | 0                  | 0                  | 0                  | 0                  | 0                  | 0              | 0              | 0              | 0                 | 0                 |
| 6320887   | SAP1    | 0                  | 0                  | 0                  | 0                  | 0                  | 0                  | 0                  | 0                  | 0              | 0              | 0              | 0                 | 0                 |
| 6321204   | SEC15   | 0                  | 0                  | 0                  | 0                  | 0                  | 0                  | 0                  | 0                  | 0              | 0              | 0              | 0                 | 0                 |
| 6323111   | SRL2    | 0                  | 0                  | 0                  | 0                  | 0                  | 0                  | 0                  | 0                  | 0              | 0              | 0              | 0                 | 0                 |
| 398366601 | SSN2    | 0                  | 0                  | 0                  | 0                  | 0                  | 0                  | 0                  | 0                  | 0              | 0              | 0              | 0                 | 0                 |
| 6323541   | VPS9    | 0                  | 0                  | 0                  | 0                  | 0                  | 0                  | 0                  | 0                  | 0              | 0              | 0              | 0                 | 0                 |
| 6321955   | YAP1801 | 0                  | 0                  | 0                  | 0                  | 0                  | 0                  | 0                  | 0                  | 1.41           | 1              | 1              | 0                 | 0                 |
| 6323215   | EMG1    | 3                  | 4                  | 15.08              | 3                  | 4                  | 17.46              | 3                  | 4                  | 5.16           | 1              | 2              | 0                 | 0                 |
| 6319868   | HTL1    | 0                  | 0                  | 0                  | 0                  | 0                  | 14.10              | 1                  | 2                  | 11.54          | 1              | 2              | 0                 | 0                 |
| 6321537   | MDR1    | 1                  | 1                  | 0.84               | 1                  | 1                  | 0                  | 0                  | 0                  | 1.16           | 1              | 2              | 0                 | 0                 |















Table S1 - Smith-Kinnaman, *et al* (2014) Abbreviations: %SC = percent sequence coverage, UP = unique peptides, PSM = peptide spectrum matches

| Accession | Acronym  | UP                 | # PSM              | %SC                | UP                 | # PSM              | %SC                | UP                 | # PSM              | %SC            | UP             | # PSM          | %SC               | UP                |
|-----------|----------|--------------------|--------------------|--------------------|--------------------|--------------------|--------------------|--------------------|--------------------|----------------|----------------|----------------|-------------------|-------------------|
|           |          | BY4741_F<br>LAG_J1 | BY4741_F<br>LAG_J1 | BY4741_FL<br>AG_J2 | BY4741_F<br>LAG_J2 | BY4741_F<br>LAG_J2 | BY4741_FL<br>AG_J3 | BY4741_F<br>LAG_J3 | BY4741_F<br>LAG_J3 | V5_Rtr1_<br>WT | V5_Rtr1_<br>WT | V5_Rtr1_<br>WT | TAP_Rtr1<br>_WT_1 | TAP_Rtr1<br>_WT_1 |
| 6320533   | YSP2     | 1                  | 1                  | 0.70               | 1                  | 1                  | 0                  | 0                  | 0                  | 0              | 0              | 0              | 0                 | 0                 |
| 6323749   | YMR102C  | 1                  | 1                  | 0.96               | 1                  | 1                  | 0                  | 0                  | 0                  | 0              | 0              | 0              | 0                 | 0                 |
| 6324651   | RTS2     | 1                  | 1                  | 4.31               | 1                  | 1                  | 0                  | 0                  | 0                  | 0              | 0              | 0              | 0                 | 0                 |
| 6323005   | POM33    | 0                  | 0                  | 2.51               | 1                  | 1                  | 0                  | 0                  | 0                  | 0              | 0              | 0              | 0                 | 0                 |
| 6322036   | GUT2     | 0                  | 0                  | 0                  | 0                  | 0                  | 0                  | 0                  | 0                  | 0              | 0              | 0              | 0                 | 0                 |
| 398365235 | POP7     | 0                  | 0                  | 0                  | 0                  | 0                  | 0                  | 0                  | 0                  | 0              | 0              | 0              | 0                 | 0                 |
| 6321629   | HIP1     | 0                  | 0                  | 0                  | 0                  | 0                  | 0                  | 0                  | 0                  | 0              | 0              | 0              | 0                 | 0                 |
| 6323062   | SMF3     | 0                  | 0                  | 0                  | 0                  | 0                  | 0                  | 0                  | 0                  | 0              | 0              | 0              | 0                 | 0                 |
| 6320619   | DFM1     | 0                  | 0                  | 0                  | 0                  | 0                  | 0                  | 0                  | 0                  | 0              | 0              | 0              | 0                 | 0                 |
| 398366299 | YGR250C  | 0                  | 0                  | 0                  | 0                  | 0                  | 0                  | 0                  | 0                  | 0              | 0              | 0              | 0                 | 0                 |
| 73858744  | YIL156W- | 0                  | 0                  | 0                  | 0                  | 0                  | 0                  | 0                  | 0                  | 0              | 0              | 0              | 0                 | 0                 |
| 6322672   | LST4     | 0                  | 0                  | 0                  | 0                  | 0                  | 0                  | 0                  | 0                  | 0              | 0              | 0              | 0                 | 0                 |
| 6323224   | NMT1     | 0                  | 0                  | 0                  | 0                  | 0                  | 0                  | 0                  | 0                  | 0              | 0              | 0              | 0                 | 0                 |
| 6325414   | TPO3     | 0                  | 0                  | 0                  | 0                  | 0                  | 0                  | 0                  | 0                  | 0              | 0              | 0              | 0                 | 0                 |
| 9755339   | TAD3     | 0                  | 0                  | 0                  | 0                  | 0                  | 0                  | 0                  | 0                  | 0              | 0              | 0              | 0                 | 0                 |
| 6320031   | UGA3     | 0                  | 0                  | 0                  | 0                  | 0                  | 0                  | 0                  | 0                  | 0              | 0              | 0              | 0                 | 0                 |
| 6323713   | AVO2     | 0                  | 0                  | 0                  | 0                  | 0                  | 0                  | 0                  | 0                  | 0              | 0              | 0              | 0                 | 0                 |
| 269970308 | SSY5     | 0                  | 0                  | 0                  | 0                  | 0                  | 1.43               | 1                  | 1                  | 0              | 0              | 0              | 1.43              | 1                 |
| 6323127   | CHA4     | 0                  | 0                  | 0                  | 0                  | 0                  | 0                  | 0                  | 0                  | 0              | 0              | 0              | 2.16              | 1                 |
| 6319498   | SCO2     | 0                  | 0                  | 0                  | 0                  | 0                  | 0                  | 0                  | 0                  | 0              | 0              | 0              | 4.65              | 1                 |
| 398364781 | VFA1     | 0                  | 0                  | 0                  | 0                  | 0                  | 0                  | 0                  | 0                  | 0              | 0              | 0              | 7.39              | 1                 |
| 269970305 | ADH4     | 0                  | 0                  | 0                  | 0                  | 0                  | 4.45               | 1                  | 2                  | 0              | 0              | 0              | 0                 | 0                 |
| 269970311 | ASK1     | 0                  | 0                  | 0                  | 0                  | 0                  | 6.51               | 1                  | 2                  | 0              | 0              | 0              | 0                 | 0                 |
| 6321833   | DOG2     | 0                  | 0                  | 0                  | 0                  | 0                  | 8.13               | 1                  | 2                  | 0              | 0              | 0              | 0                 | 0                 |
| 42759857  | NBL1     | 0                  | 0                  | 0                  | 0                  | 0                  | 23.29              | 2                  | 2                  | 0              | 0              | 0              | 0                 | 0                 |
| 398365807 | REI1     | 0                  | 0                  | 0                  | 0                  | 0                  | 3.82               | 1                  | 2                  | 0              | 0              | 0              | 0                 | 0                 |
| 398366469 | SRB7     | 0                  | 0                  | 0                  | 0                  | 0                  | 12.14              | 1                  | 2                  | 0              | 0              | 0              | 0                 | 0                 |
| 6323627   | TRM9     | 0                  | 0                  | 0                  | 0                  | 0                  | 5.38               | 1                  | 2                  | 0              | 0              | 0              | 0                 | 0                 |
| 6319933   | YCRO90C  | 0                  | 0                  | 0                  | 0                  | 0                  | 4.40               | 1                  | 1                  | 0              | 0              | 0              | 0                 | 0                 |
| 398364703 | YNL134C  | 0                  | 0                  | 0                  | 0                  | 0                  | 3.19               | 1                  | 1                  | 0              | 0              | 0              | 0                 | 0                 |
| 6321870   | IRE1     | 0                  | 0                  | 0                  | 0                  | 0                  | 1.17               | 1                  | 1                  | 0              | 0              | 0              | 0                 | 0                 |
| 398365167 | ARO3     | 0                  | 0                  | 0                  | 0                  | 0                  | 4.32               | 1                  | 1                  | 0              | 0              | 0              | 0                 | 0                 |
| 6322656   | ACP1     | 0                  | 0                  | 0                  | 0                  | 0                  | 12.80              | 1                  | 1                  | 0              | 0              | 0              | 0                 | 0                 |
| 398364449 | CEG1     | 0                  | 0                  | 0                  | 0                  | 0                  | 4.14               | 1                  | 1                  | 0              | 0              | 0              | 0                 | 0                 |
| 21450619  | DAD3     | 0                  | 0                  | 0                  | 0                  | 0                  | 9.57               | 1                  | 1                  | 0              | 0              | 0              | 0                 | 0                 |
| 398364901 | MED2     | 0                  | 0                  | 0                  | 0                  | 0                  | 2.32               | 1                  | 1                  | 0              | 0              | 0              | 0                 | 0                 |
| 6323220   | PEX13    | 0                  | 0                  | 0                  | 0                  | 0                  | 3.63               | 1                  | 1                  | 0              | 0              | 0              | 0                 | 0                 |











Table S1 - Smith-Kinnaman, *et al* (2014) Abbreviations: %SC = percent sequence coverage, UP = unique peptides, PSM = peptide spectrum matches

| Accession | Acronym | UP                 | # PSM              | %SC                | UP                 | # PSM              | %SC                | UP                 | # PSM              | %SC            | UP             | # PSM          | %SC                | UP                 |
|-----------|---------|--------------------|--------------------|--------------------|--------------------|--------------------|--------------------|--------------------|--------------------|----------------|----------------|----------------|--------------------|--------------------|
|           |         | BY4741_F<br>LAG_J1 | BY4741_F<br>LAG_J1 | BY4741_FL<br>AG_J2 | BY4741_F<br>LAG_J2 | BY4741_F<br>LAG_J2 | BY4741_FL<br>AG_J3 | BY4741_F<br>LAG_J3 | BY4741_F<br>LAG_J3 | V5_Rtr1_<br>WT | V5_Rtr1_<br>WT | V5_Rtr1_<br>WT | TAP_Rtr1_<br>_WT_1 | TAP_Rtr1_<br>_WT_1 |
| 398364729 | LYS1    | 0                  | 0                  | 0                  | 0                  | 0                  | 0                  | 0                  | 0                  | 0              | 0              | 0              | 4.56               | 1                  |
| 6322800   | SFK1    | 0                  | 0                  | 0                  | 0                  | 0                  | 0                  | 0                  | 0                  | 0              | 0              | 0              | 3.40               | 1                  |
| 6320860   | SRB4    | 0                  | 0                  | 0                  | 0                  | 0                  | 0                  | 0                  | 0                  | 0              | 0              | 0              | 2.47               | 1                  |
| 398365591 | TDP1    | 0                  | 0                  | 0                  | 0                  | 0                  | 0                  | 0                  | 0                  | 0              | 0              | 0              | 2.57               | 1                  |
| 6321769   | YHL018W | 0                  | 0                  | 0                  | 0                  | 0                  | 9.17               | 1                  | 1                  | 0              | 0              | 0              | 0                  | 0                  |
| 6321830   | BCD1    | 0                  | 0                  | 0                  | 0                  | 0                  | 4.10               | 1                  | 1                  | 0              | 0              | 0              | 0                  | 0                  |
| 398366341 | CIN1    | 0                  | 0                  | 0                  | 0                  | 0                  | 0.79               | 1                  | 1                  | 0              | 0              | 0              | 0                  | 0                  |
| 6323894   | DFG5    | 0                  | 0                  | 0                  | 0                  | 0                  | 2.84               | 1                  | 1                  | 0              | 0              | 0              | 0                  | 0                  |
| 398366533 | DXO1    | 0                  | 0                  | 0                  | 0                  | 0                  | 1.81               | 1                  | 1                  | 0              | 0              | 0              | 0                  | 0                  |
| 398366665 | EMI1    | 0                  | 0                  | 0                  | 0                  | 0                  | 9.09               | 1                  | 1                  | 0              | 0              | 0              | 0                  | 0                  |
| 6320903   | FCY22   | 0                  | 0                  | 0                  | 0                  | 0                  | 1.70               | 1                  | 1                  | 0              | 0              | 0              | 0                  | 0                  |
| 6324540   | MSE1    | 0                  | 0                  | 0                  | 0                  | 0                  | 4.29               | 1                  | 1                  | 0              | 0              | 0              | 0                  | 0                  |
| 6323006   | HIF1    | 0                  | 0                  | 0                  | 0                  | 0                  | 5.19               | 1                  | 1                  | 0              | 0              | 0              | 0                  | 0                  |
| 6319899   | YCR051W | 0                  | 0                  | 0                  | 0                  | 0                  | 5.86               | 1                  | 1                  | 0              | 0              | 0              | 0                  | 0                  |
| 6320512   | YDR306C | 0                  | 0                  | 0                  | 0                  | 0                  | 3.56               | 1                  | 1                  | 0              | 0              | 0              | 0                  | 0                  |
| 6321402   | YGL036W | 0                  | 0                  | 0                  | 0                  | 0                  | 1.43               | 1                  | 1                  | 0              | 0              | 0              | 0                  | 0                  |
| 6322314   | YJL147C | 0                  | 0                  | 0                  | 0                  | 0                  | 1.83               | 1                  | 1                  | 0              | 0              | 0              | 0                  | 0                  |
| 6324499   | YOL073C | 0                  | 0                  | 0                  | 0                  | 0                  | 3.11               | 1                  | 1                  | 0              | 0              | 0              | 0                  | 0                  |
| 330443728 | YOL075C | 0                  | 0                  | 0                  | 0                  | 0                  | 0.93               | 1                  | 1                  | 0              | 0              | 0              | 0                  | 0                  |
| 6323268   | LIP2    | 0                  | 0                  | 0                  | 0                  | 0                  | 5.79               | 1                  | 1                  | 0              | 0              | 0              | 0                  | 0                  |
| 6322349   | MDV1    | 0                  | 0                  | 0                  | 0                  | 0                  | 2.24               | 1                  | 1                  | 0              | 0              | 0              | 0                  | 0                  |
| 398365753 | RSM19   | 0                  | 0                  | 0                  | 0                  | 0                  | 10.99              | 1                  | 1                  | 0              | 0              | 0              | 0                  | 0                  |
| 6322678   | YML38   | 0                  | 0                  | 0                  | 0                  | 0                  | 11.59              | 1                  | 1                  | 0              | 0              | 0              | 0                  | 0                  |
| 6323715   | MOT3    | 0                  | 0                  | 0                  | 0                  | 0                  | 2.24               | 1                  | 1                  | 0              | 0              | 0              | 0                  | 0                  |
| 330443507 | MPS1    | 0                  | 0                  | 0                  | 0                  | 0                  | 3.40               | 1                  | 1                  | 0              | 0              | 0              | 0                  | 0                  |
| 6323816   | MSS11   | 0                  | 0                  | 0                  | 0                  | 0                  | 1.45               | 1                  | 1                  | 0              | 0              | 0              | 0                  | 0                  |
| 6323714   | NAT4    | 0                  | 0                  | 0                  | 0                  | 0                  | 4.56               | 1                  | 1                  | 0              | 0              | 0              | 0                  | 0                  |
| 6323913   | PET111  | 0                  | 0                  | 0                  | 0                  | 0                  | 1.00               | 1                  | 1                  | 0              | 0              | 0              | 0                  | 0                  |
| 6321514   | PEX8    | 0                  | 0                  | 0                  | 0                  | 0                  | 2.21               | 1                  | 1                  | 0              | 0              | 0              | 0                  | 0                  |
| 330443601 | PFD1    | 0                  | 0                  | 0                  | 0                  | 0                  | 13.76              | 1                  | 1                  | 0              | 0              | 0              | 0                  | 0                  |
| 14318559  | PHO4    | 0                  | 0                  | 0                  | 0                  | 0                  | 3.21               | 1                  | 1                  | 0              | 0              | 0              | 0                  | 0                  |
| 6325444   | PZF1    | 0                  | 0                  | 0                  | 0                  | 0                  | 3.26               | 1                  | 1                  | 0              | 0              | 0              | 0                  | 0                  |
| 6324200   | NRK1    | 0                  | 0                  | 0                  | 0                  | 0                  | 6.25               | 1                  | 1                  | 0              | 0              | 0              | 0                  | 0                  |
| 6323914   | ROY1    | 0                  | 0                  | 0                  | 0                  | 0                  | 1.99               | 1                  | 1                  | 0              | 0              | 0              | 0                  | 0                  |
| 6320250   | RPC11   | 0                  | 0                  | 0                  | 0                  | 0                  | 16.36              | 1                  | 1                  | 0              | 0              | 0              | 0                  | 0                  |
| 398366011 | MDM3    | 0                  | 0                  | 0                  | 0                  | 0                  | 2.51               | 1                  | 1                  | 0              | 0              | 0              | 0                  | 0                  |
| 6320089   | YDL114W | 0                  | 0                  | 0                  | 0                  | 0                  | 6.17               | 1                  | 1                  | 0              | 0              | 0              | 0                  | 0                  |









Table S1 - Smith-Kinnaman, *et al* (2014) Abbreviations: %SC = percent sequence coverage, UP = unique peptides, PSM = peptide spectrum matches

| Accession | Acronym | UP                 | # PSM              | %SC                | UP                 | # PSM              | %SC                | UP                 | # PSM              | %SC            | UP             | # PSM          | %SC               | UP                |
|-----------|---------|--------------------|--------------------|--------------------|--------------------|--------------------|--------------------|--------------------|--------------------|----------------|----------------|----------------|-------------------|-------------------|
|           |         | BY4741_F<br>LAG_J1 | BY4741_F<br>LAG_J1 | BY4741_FL<br>AG_J2 | BY4741_F<br>LAG_J2 | BY4741_F<br>LAG_J2 | BY4741_FL<br>AG_J3 | BY4741_F<br>LAG_J3 | BY4741_F<br>LAG_J3 | V5_Rtr1_<br>WT | V5_Rtr1_<br>WT | V5_Rtr1_<br>WT | TAP_Rtr1<br>_WT_1 | TAP_Rtr1<br>_WT_1 |
| 398365719 | CLB6    | 0                  | 0                  | 0                  | 0                  | 0                  | 0                  | 0                  | 0                  | 0              | 0              | 0              | 0                 | 0                 |
| 6324674   | CRC1    | 0                  | 0                  | 0                  | 0                  | 0                  | 0                  | 0                  | 0                  | 0              | 0              | 0              | 0                 | 0                 |
| 6321317   | GPG1    | 0                  | 0                  | 0                  | 0                  | 0                  | 0                  | 0                  | 0                  | 0              | 0              | 0              | 0                 | 0                 |
| 6324832   | HNT3    | 0                  | 0                  | 0                  | 0                  | 0                  | 0                  | 0                  | 0                  | 0              | 0              | 0              | 0                 | 0                 |
| 6321177   | YGL260W | 0                  | 0                  | 0                  | 0                  | 0                  | 0                  | 0                  | 0                  | 0              | 0              | 0              | 0                 | 0                 |
| 6323877   | YMR221C | 0                  | 0                  | 0                  | 0                  | 0                  | 0                  | 0                  | 0                  | 0              | 0              | 0              | 0                 | 0                 |
| 6319408   | KIP1    | 0                  | 0                  | 0                  | 0                  | 0                  | 0                  | 0                  | 0                  | 0              | 0              | 0              | 0                 | 0                 |
| 6324872   | MUM3    | 0                  | 0                  | 0                  | 0                  | 0                  | 0                  | 0                  | 0                  | 0              | 0              | 0              | 0                 | 0                 |
| 6323136   | REX3    | 0                  | 0                  | 0                  | 0                  | 0                  | 0                  | 0                  | 0                  | 0              | 0              | 0              | 0                 | 0                 |
| 398366181 | SLI1    | 0                  | 0                  | 0                  | 0                  | 0                  | 0                  | 0                  | 0                  | 0              | 0              | 0              | 0                 | 0                 |
| 6323658   | SOK2    | 0                  | 0                  | 0                  | 0                  | 0                  | 0                  | 0                  | 0                  | 0              | 0              | 0              | 0                 | 0                 |
| 6320871   | ZRG8    | 0                  | 0                  | 0                  | 0                  | 0                  | 0                  | 0                  | 0                  | 0              | 0              | 0              | 0                 | 0                 |
| 6324461   | MDY2    | 3                  | 5                  | 16.51              | 3                  | 5                  | 5.19               | 1                  | 3                  | 5.19           | 1              | 1              | 0                 | 0                 |
| 6324739   | SEY1    | 1                  | 1                  | 1.68               | 1                  | 1                  | 0                  | 0                  | 0                  | 1.29           | 1              | 1              | 0                 | 0                 |
| 398365665 | YNR021W | 1                  | 1                  | 4.21               | 1                  | 1                  | 4.21               | 1                  | 2                  | 1.98           | 1              | 1              | 0                 | 0                 |
| 6322465   | POL31   | 1                  | 1                  | 2.26               | 1                  | 1                  | 2.26               | 1                  | 1                  | 4.11           | 1              | 1              | 0                 | 0                 |
| 6323610   | NDC1    | 0                  | 0                  | 0                  | 0                  | 0                  | 0                  | 0                  | 0                  | 1.83           | 1              | 1              | 0                 | 0                 |
| 6323736   | YTA12   | 1                  | 1                  | 2.06               | 1                  | 1                  | 0                  | 0                  | 0                  | 2.30           | 1              | 1              | 0                 | 0                 |
| 6323671   | FAR8    | 1                  | 1                  | 1.34               | 1                  | 1                  | 2.68               | 1                  | 1                  | 1.72           | 1              | 1              | 0                 | 0                 |
| 6319503   | CDS1    | 1                  | 1                  | 1.97               | 1                  | 1                  | 0                  | 0                  | 0                  | 2.63           | 1              | 1              | 0                 | 0                 |
| 398366089 | MPD1    | 1                  | 1                  | 3.46               | 1                  | 1                  | 0                  | 0                  | 0                  | 2.52           | 1              | 1              | 0                 | 0                 |
| 6321373   | ALG2    | 1                  | 1                  | 2.58               | 1                  | 1                  | 0                  | 0                  | 0                  | 2.58           | 1              | 1              | 0                 | 0                 |
| 6325397   | LOA1    | 1                  | 1                  | 5.33               | 1                  | 1                  | 0                  | 0                  | 0                  | 3.00           | 1              | 1              | 0                 | 0                 |
| 116006497 | MRPL15  | 0                  | 0                  | 0                  | 0                  | 0                  | 3.56               | 1                  | 1                  | 4.74           | 1              | 1              | 0                 | 0                 |
| 330443583 | ERG7    | 1                  | 1                  | 2.05               | 1                  | 1                  | 0                  | 0                  | 0                  | 1.64           | 1              | 1              | 0                 | 0                 |
| 6324069   | LTO1    | 1                  | 1                  | 5.05               | 1                  | 1                  | 0                  | 0                  | 0                  | 6.57           | 1              | 1              | 0                 | 0                 |
| 6324930   | MSC6    | 1                  | 1                  | 1.59               | 1                  | 1                  | 0                  | 0                  | 0                  | 1.88           | 1              | 1              | 0                 | 0                 |
| 6320901   | PCL6    | 1                  | 1                  | 1.90               | 1                  | 1                  | 0                  | 0                  | 0                  | 2.62           | 1              | 1              | 0                 | 0                 |
| 398365081 | SPC34   | 1                  | 1                  | 4.75               | 1                  | 1                  | 0                  | 0                  | 0                  | 5.08           | 1              | 1              | 0                 | 0                 |
| 6321878   | NAM8    | 0                  | 0                  | 0                  | 0                  | 0                  | 0                  | 0                  | 0                  | 3.63           | 1              | 1              | 0                 | 0                 |
| 398364895 | RAV1    | 0                  | 0                  | 0                  | 0                  | 0                  | 0                  | 0                  | 0                  | 0.96           | 1              | 1              | 0                 | 0                 |
| 42759860  | TOR2    | 0                  | 0                  | 0                  | 0                  | 0                  | 0                  | 0                  | 0                  | 0.36           | 1              | 1              | 0                 | 0                 |
| 14270687  | AST1    | 0                  | 0                  | 0                  | 0                  | 0                  | 2.33               | 1                  | 1                  | 1.63           | 1              | 1              | 0                 | 0                 |
| 398364431 | AGE2    | 0                  | 0                  | 0                  | 0                  | 0                  | 0                  | 0                  | 0                  | 2.68           | 1              | 1              | 0                 | 0                 |
| 398365583 | GAC1    | 0                  | 0                  | 0                  | 0                  | 0                  | 0                  | 0                  | 0                  | 1.77           | 1              | 1              | 0                 | 0                 |
| 6324345   | RCF2    | 0                  | 0                  | 0                  | 0                  | 0                  | 0                  | 0                  | 0                  | 4.91           | 1              | 1              | 0                 | 0                 |
| 6322351   | GZF3    | 0                  | 0                  | 0                  | 0                  | 0                  | 0                  | 0                  | 0                  | 2.18           | 1              | 1              | 0                 | 0                 |



Table S1 - Smith-Kinnaman, *et al* (2014) Abbreviations: %SC = percent sequence coverage, UP = unique peptides, PSM = peptide spectrum matches

| Accession | Acronym | UP                 | # PSM              | %SC                | UP                 | # PSM              | %SC                | UP                 | # PSM              | %SC            | UP             | # PSM          | %SC               | UP                |
|-----------|---------|--------------------|--------------------|--------------------|--------------------|--------------------|--------------------|--------------------|--------------------|----------------|----------------|----------------|-------------------|-------------------|
|           |         | BY4741_F<br>LAG_J1 | BY4741_F<br>LAG_J1 | BY4741_FL<br>AG_J2 | BY4741_F<br>LAG_J2 | BY4741_F<br>LAG_J2 | BY4741_FL<br>AG_J3 | BY4741_F<br>LAG_J3 | BY4741_F<br>LAG_J3 | V5_Rtr1_<br>WT | V5_Rtr1_<br>WT | V5_Rtr1_<br>WT | TAP_Rtr1<br>_WT_1 | TAP_Rtr1<br>_WT_1 |
| 330443362 | BDH1    | 0                  | 0                  | 0                  | 0                  | 0                  | 0                  | 0                  | 0                  | 2.36           | 1              | 1              | 0                 | 0                 |
| 6325377   | CLB5    | 0                  | 0                  | 0                  | 0                  | 0                  | 0                  | 0                  | 0                  | 1.84           | 1              | 1              | 0                 | 0                 |
| 6324301   | CRZ1    | 0                  | 0                  | 0                  | 0                  | 0                  | 0                  | 0                  | 0                  | 1.33           | 1              | 1              | 0                 | 0                 |
| 6321426   | ERG4    | 0                  | 0                  | 0                  | 0                  | 0                  | 0                  | 0                  | 0                  | 1.69           | 1              | 1              | 0                 | 0                 |
| 6322803   | ELM1    | 0                  | 0                  | 0                  | 0                  | 0                  | 0                  | 0                  | 0                  | 1.41           | 1              | 1              | 0                 | 0                 |
| 398366135 | FLD1    | 0                  | 0                  | 0                  | 0                  | 0                  | 0                  | 0                  | 0                  | 5.26           | 1              | 1              | 0                 | 0                 |
| 6321381   | GEP7    | 0                  | 0                  | 0                  | 0                  | 0                  | 0                  | 0                  | 0                  | 2.44           | 1              | 1              | 0                 | 0                 |
| 6325242   | HST2    | 0                  | 0                  | 0                  | 0                  | 0                  | 0                  | 0                  | 0                  | 3.64           | 1              | 1              | 0                 | 0                 |
| 330443455 | YBR138C | 0                  | 0                  | 0                  | 0                  | 0                  | 0                  | 0                  | 0                  | 1.72           | 1              | 1              | 0                 | 0                 |
| 6320002   | YDL199C | 0                  | 0                  | 0                  | 0                  | 0                  | 0                  | 0                  | 0                  | 4.66           | 1              | 1              | 0                 | 0                 |
| 6320294   | YDR089W | 0                  | 0                  | 0                  | 0                  | 0                  | 0                  | 0                  | 0                  | 1.38           | 1              | 1              | 0                 | 0                 |
| 6322972   | YLL056C | 0                  | 0                  | 0                  | 0                  | 0                  | 0                  | 0                  | 0                  | 2.68           | 1              | 1              | 0                 | 0                 |
| 6323358   | YLR326W | 0                  | 0                  | 0                  | 0                  | 0                  | 0                  | 0                  | 0                  | 6.25           | 1              | 1              | 0                 | 0                 |
| 6325189   | YPL068C | 0                  | 0                  | 0                  | 0                  | 0                  | 0                  | 0                  | 0                  | 7.85           | 1              | 1              | 0                 | 0                 |
| 398366259 | KEL2    | 0                  | 0                  | 0                  | 0                  | 0                  | 0                  | 0                  | 0                  | 0.91           | 1              | 1              | 0                 | 0                 |
| 6324755   | LAS17   | 0                  | 0                  | 0                  | 0                  | 0                  | 0                  | 0                  | 0                  | 1.42           | 1              | 1              | 0                 | 0                 |
| 6323686   | MCM1    | 0                  | 0                  | 0                  | 0                  | 0                  | 0                  | 0                  | 0                  | 3.85           | 1              | 1              | 0                 | 0                 |
| 6321441   | PEX31   | 0                  | 0                  | 0                  | 0                  | 0                  | 0                  | 0                  | 0                  | 3.46           | 1              | 1              | 0                 | 0                 |
| 6324436   | PFK27   | 0                  | 0                  | 0                  | 0                  | 0                  | 0                  | 0                  | 0                  | 2.52           | 1              | 1              | 0                 | 0                 |
| 398366391 | PIP2    | 0                  | 0                  | 0                  | 0                  | 0                  | 0                  | 0                  | 0                  | 0.90           | 1              | 1              | 0                 | 0                 |
| 6323238   | PNP1    | 0                  | 0                  | 0                  | 0                  | 0                  | 0                  | 0                  | 0                  | 2.25           | 1              | 1              | 0                 | 0                 |
| 6319818   | RRP7    | 0                  | 0                  | 0                  | 0                  | 0                  | 0                  | 0                  | 0                  | 3.03           | 1              | 1              | 0                 | 0                 |
| 6323655   | SEC59   | 0                  | 0                  | 0                  | 0                  | 0                  | 0                  | 0                  | 0                  | 1.54           | 1              | 1              | 0                 | 0                 |
| 6324650   | SKI7    | 0                  | 0                  | 0                  | 0                  | 0                  | 0                  | 0                  | 0                  | 2.01           | 1              | 1              | 0                 | 0                 |
| 6324847   | TPO4    | 0                  | 0                  | 0                  | 0                  | 0                  | 0                  | 0                  | 0                  | 1.21           | 1              | 1              | 0                 | 0                 |
| 398366289 | RMD5    | 0                  | 0                  | 0                  | 0                  | 0                  | 0                  | 0                  | 0                  | 2.85           | 1              | 1              | 0                 | 0                 |
| 398364689 | YVH1    | 2                  | 2                  | 6.32               | 2                  | 2                  | 18.41              | 4                  | 10                 | 7.14           | 2              | 2              | 0                 | 0                 |
| 6324543   | GAS5    | 3                  | 4                  | 8.88               | 3                  | 4                  | 8.26               | 3                  | 3                  | 2.48           | 1              | 2              | 0                 | 0                 |
| 6322303   | CIS3    | 2                  | 2                  | 7.05               | 2                  | 2                  | 3.52               | 1                  | 1                  | 3.52           | 1              | 2              | 0                 | 0                 |
| 6325237   | ULP1    | 2                  | 3                  | 3.70               | 2                  | 3                  | 0                  | 0                  | 0                  | 1.29           | 1              | 2              | 0                 | 0                 |
| 116006493 | HSP150  | 2                  | 2                  | 10.90              | 2                  | 2                  | 1.94               | 1                  | 1                  | 1.94           | 1              | 2              | 0                 | 0                 |
| 6226534   | VAR1    | 1                  | 2                  | 2.76               | 1                  | 2                  | 0                  | 0                  | 0                  | 2.51           | 1              | 2              | 0                 | 0                 |
| 6321942   | IMP3    | 1                  | 1                  | 8.20               | 1                  | 1                  | 0                  | 0                  | 0                  | 4.37           | 1              | 2              | 0                 | 0                 |
| 6320857   | SBH2    | 1                  | 1                  | 14.77              | 1                  | 1                  | 0                  | 0                  | 0                  | 14.77          | 1              | 2              | 0                 | 0                 |
| 6321909   | TOM71   | 0                  | 0                  | 0                  | 0                  | 0                  | 0                  | 0                  | 0                  | 3.13           | 2              | 2              | 0                 | 0                 |
| 6321566   | YGR127W | 1                  | 1                  | 2.56               | 1                  | 1                  | 0                  | 0                  | 0                  | 2.56           | 1              | 2              | 0                 | 0                 |
| 6323942   | YML33   | 1                  | 1                  | 16.28              | 1                  | 1                  | 0                  | 0                  | 0                  | 13.95          | 1              | 2              | 0                 | 0                 |

Table S1 - Smith-Kinnaman, *et al* (2014) Abbreviations: %SC = percent sequence coverage, UP = unique peptides, PSM = peptide spectrum matches

| Accession | Acronym | UP                 | # PSM              | %SC                | UP                 | # PSM              | %SC                | UP                 | # PSM              | %SC            | UP             | # PSM          | %SC               | UP                |
|-----------|---------|--------------------|--------------------|--------------------|--------------------|--------------------|--------------------|--------------------|--------------------|----------------|----------------|----------------|-------------------|-------------------|
|           |         | BY4741_F<br>LAG_J1 | BY4741_F<br>LAG_J1 | BY4741_FL<br>AG_J2 | BY4741_F<br>LAG_J2 | BY4741_F<br>LAG_J2 | BY4741_FL<br>AG_J3 | BY4741_F<br>LAG_J3 | BY4741_F<br>LAG_J3 | V5_Rtr1_<br>WT | V5_Rtr1_<br>WT | V5_Rtr1_<br>WT | TAP_Rtr1<br>_WT_1 | TAP_Rtr1<br>_WT_1 |
| 6325075   | CTI6    | 0                  | 0                  | 0                  | 0                  | 0                  | 0                  | 0                  | 0                  | 2.57           | 1              | 2              | 0                 | 0                 |
| 6323612   | USA1    | 0                  | 0                  | 0                  | 0                  | 0                  | 0                  | 0                  | 0                  | 1.55           | 1              | 2              | 0                 | 0                 |
| 6324845   | FSF1    | 0                  | 0                  | 0                  | 0                  | 0                  | 0                  | 0                  | 0                  | 3.98           | 1              | 2              | 0                 | 0                 |
| 398365295 | YDR056C | 0                  | 0                  | 0                  | 0                  | 0                  | 0                  | 0                  | 0                  | 6.83           | 1              | 2              | 0                 | 0                 |
| 6324510   | APM4    | 0                  | 0                  | 0                  | 0                  | 0                  | 0                  | 0                  | 0                  | 2.04           | 1              | 2              | 0                 | 0                 |
| 6323263   | TOP3    | 0                  | 0                  | 0                  | 0                  | 0                  | 0                  | 0                  | 0                  | 1.52           | 1              | 2              | 0                 | 0                 |
| 41629680  | FMP21   | 0                  | 0                  | 0                  | 0                  | 0                  | 0                  | 0                  | 0                  | 5.80           | 1              | 2              | 0                 | 0                 |
| 6319813   | GFD2    | 0                  | 0                  | 0                  | 0                  | 0                  | 0                  | 0                  | 0                  | 1.59           | 1              | 2              | 0                 | 0                 |
| 6324214   | YNL115C | 0                  | 0                  | 0                  | 0                  | 0                  | 0                  | 0                  | 0                  | 2.02           | 1              | 2              | 0                 | 0                 |
| 398364237 | RML2    | 0                  | 0                  | 0                  | 0                  | 0                  | 0                  | 0                  | 0                  | 3.82           | 2              | 2              | 0                 | 0                 |
| 398365189 | OCA2    | 0                  | 0                  | 0                  | 0                  | 0                  | 0                  | 0                  | 0                  | 5.08           | 1              | 2              | 0                 | 0                 |
| 398366517 | SPC110  | 0                  | 0                  | 0                  | 0                  | 0                  | 0                  | 0                  | 0                  | 1.17           | 1              | 2              | 0                 | 0                 |
| 6323897   | YHM2    | 0                  | 0                  | 0                  | 0                  | 0                  | 0                  | 0                  | 0                  | 2.55           | 1              | 3              | 0                 | 0                 |
| 6323573   | ERV41   | 0                  | 0                  | 0                  | 0                  | 0                  | 0                  | 0                  | 0                  | 2.27           | 1              | 3              | 0                 | 0                 |
| 6320503   | SUR2    | 0                  | 0                  | 0                  | 0                  | 0                  | 0                  | 0                  | 0                  | 5.44           | 2              | 3              | 0                 | 0                 |
| 6319643   | TYR1    | 0                  | 0                  | 0                  | 0                  | 0                  | 0                  | 0                  | 0                  | 2.21           | 1              | 3              | 0                 | 0                 |
| 398364575 | SBH1    | 0                  | 0                  | 0                  | 0                  | 0                  | 0                  | 0                  | 0                  | 13.41          | 1              | 3              | 0                 | 0                 |
| 6320189   | TSC13   | 0                  | 0                  | 0                  | 0                  | 0                  | 0                  | 0                  | 0                  | 3.55           | 2              | 4              | 0                 | 0                 |
| 6324066   | YIF1    | 0                  | 0                  | 0                  | 0                  | 0                  | 0                  | 0                  | 0                  | 4.46           | 1              | 4              | 0                 | 0                 |
| 6321596   | CHO2    | 0                  | 0                  | 0.81               | 1                  | 1                  | 0                  | 0                  | 0                  | 2.19           | 2              | 5              | 0                 | 0                 |
| 6321331   | RMD9    | 0                  | 0                  | 0                  | 0                  | 0                  | 0                  | 0                  | 0                  | 4.02           | 2              | 5              | 0                 | 0                 |
| 6323745   | ATP25   | 0                  | 0                  | 0                  | 0                  | 0                  | 0                  | 0                  | 0                  | 2.29           | 1              | 5              | 0                 | 0                 |
| 6321861   | TRM5    | 0                  | 0                  | 0                  | 0                  | 0                  | 0                  | 0                  | 0                  | 9.82           | 4              | 7              | 0                 | 0                 |
| 6321963   | SBP8    | 3                  | 3                  | 6.50               | 3                  | 3                  | 0                  | 0                  | 0                  | 3.02           | 1              | 9              | 0                 | 0                 |
| 6325448   | RPC82   | 3                  | 3                  | 5.50               | 3                  | 3                  | 2.45               | 1                  | 1                  | 5.35           | 3              | 10             | 0                 | 0                 |
| 6325370   | PIS1    | 0                  | 0                  | 0                  | 0                  | 0                  | 0                  | 0                  | 0                  | 5.00           | 1              | 10             | 0                 | 0                 |
| 6319804   | EMC1    | 0                  | 0                  | 0                  | 0                  | 0                  | 0                  | 0                  | 0                  | 3.03           | 2              | 10             | 0                 | 0                 |
| 6322762   | CAB3    | 0                  | 0                  | 0                  | 0                  | 0                  | 0                  | 0                  | 0                  | 2.10           | 1              | 12             | 0                 | 0                 |
| 99030930  | ZIM17   | 2                  | 12                 | 13.22              | 2                  | 12                 | 24.71              | 2                  | 3                  | 13.22          | 2              | 13             | 0                 | 0                 |

Table S1 - Smith-Kinnaman, *et al* (2014) Abbreviations: %SC = percent sequence coverage, UP = unique peptides, PSM = peptide spectrum matches

| Accession | Acronym | # PSM<br>TAP_Rtr1_<br>WT_1 | %SC<br>TAP_Rtr1_<br>WT_2 | UP<br>TAP_Rtr1_<br>_WT_2 | # PSM<br>TAP_Rtr1_<br>_WT_2 | %SC<br>TAP_Rtr1_<br>_WT_3 | UP<br>TAP_Rtr1_<br>_WT_3 | # PSM<br>TAP_Rtr1_<br>_WT_3 | %SC<br>TAP_Rtr1_<br>_WT_4 | UP<br>TAP_Rtr1_<br>_WT_4 | # PSM<br>TAP_Rtr1_<br>_WT_4 | %SC<br>TAP_Rtr1_<br>_ctk1_del<br>etion | UP<br>TAP_Rtr1_<br>_ctk1_del<br>etion | # PSM<br>TAP_Rtr1_<br>_ctk1_del<br>etion |
|-----------|---------|----------------------------|--------------------------|--------------------------|-----------------------------|---------------------------|--------------------------|-----------------------------|---------------------------|--------------------------|-----------------------------|----------------------------------------|---------------------------------------|------------------------------------------|
| 398364847 | RTR1    | 3529                       | 75.66                    | 14                       | 623                         | 79.65                     | 21                       | 2834                        | 53.54                     | 15                       | 2499                        | 46.46                                  | 12                                    | 4513                                     |
| 6320061   | RPB1    | 845                        | 33.47                    | 37                       | 254                         | 37.05                     | 45                       | 464                         | 19.85                     | 34                       | 456                         | 4.15                                   | 6                                     | 20                                       |
| 398365417 | RPB2    | 537                        | 31.94                    | 29                       | 125                         | 35.38                     | 33                       | 292                         | 26.39                     | 28                       | 133                         | 5.23                                   | 6                                     | 16                                       |
| 398364469 | RPB3    | 116                        | 52.20                    | 10                       | 53                          | 57.86                     | 11                       | 108                         | 13.52                     | 3                        | 16                          | 0                                      | 0                                     | 0                                        |
| 6322321   | RPB4    | 8                          | 35.75                    | 4                        | 7                           | 0                         | 0                        | 0                           | 0                         | 0                        | 0                           | 0                                      | 0                                     | 0                                        |
| 6319630   | RPB5    | 108                        | 37.67                    | 7                        | 67                          | 36.74                     | 6                        | 99                          | 23.72                     | 4                        | 38                          | 6.98                                   | 1                                     | 3                                        |
| 398366567 | RPB7    | 0                          | 0                        | 0                        | 0                           | 0                         | 0                        | 0                           | 0                         | 0                        | 0                           | 0                                      | 0                                     | 0                                        |
| 398365775 | RPB10   | 10                         | 52.86                    | 2                        | 14                          | 15.71                     | 1                        | 29                          | 0                         | 0                        | 0                           | 0                                      | 0                                     | 0                                        |
| 6325445   | RPB6    | 35                         | 26.45                    | 2                        | 15                          | 26.45                     | 2                        | 10                          | 0                         | 0                        | 0                           | 0                                      | 0                                     | 0                                        |
| 6321368   | RPB9    | 9                          | 0                        | 0                        | 0                           | 12.30                     | 1                        | 5                           | 0                         | 0                        | 0                           | 0                                      | 0                                     | 0                                        |
| 6324798   | RPB8    | 21                         | 10.96                    | 1                        | 19                          | 31.51                     | 4                        | 24                          | 10.96                     | 1                        | 1                           | 0                                      | 0                                     | 0                                        |
| 6324569   | RPB11   | 39                         | 25.83                    | 3                        | 3                           | 47.50                     | 5                        | 19                          | 0                         | 0                        | 0                           | 0                                      | 0                                     | 0                                        |
| 6323632   | SPT5    | 0                          | 2.73                     | 2                        | 4                           | 7.90                      | 6                        | 18                          | 1.22                      | 1                        | 1                           | 0                                      | 0                                     | 0                                        |
| 6321625   | TFG1    | 0                          | 2.59                     | 1                        | 1                           | 0                         | 0                        | 0                           | 0                         | 0                        | 0                           | 0                                      | 0                                     | 0                                        |
| 6321937   | RPB12   | 67                         | 28.57                    | 1                        | 3                           | 40.00                     | 2                        | 35                          | 28.57                     | 1                        | 3                           | 0                                      | 0                                     | 0                                        |
| 398365043 | TFG2    | 0                          | 0                        | 0                        | 0                           | 0                         | 0                        | 0                           | 3.00                      | 1                        | 1                           | 0                                      | 0                                     | 0                                        |
| 154199603 | IWR1    | 0                          | 0                        | 0                        | 0                           | 0                         | 0                        | 0                           | 0                         | 0                        | 0                           | 0                                      | 0                                     | 0                                        |
| 398365457 | SPT4    | 0                          | 0                        | 0                        | 0                           | 0                         | 0                        | 0                           | 0                         | 0                        | 0                           | 0                                      | 0                                     | 0                                        |
| 6325128   | TAF14   | 0                          | 0                        | 0                        | 0                           | 6.97                      | 1                        | 3                           | 0                         | 0                        | 0                           | 0                                      | 0                                     | 0                                        |
| 398365155 | NPA3    | 40                         | 6.23                     | 2                        | 8                           | 20.00                     | 7                        | 28                          | 2.60                      | 1                        | 1                           | 0                                      | 0                                     | 0                                        |
| 6323272   | GPN3    | 24                         | 10.66                    | 2                        | 4                           | 10.66                     | 2                        | 7                           | 0                         | 0                        | 0                           | 0                                      | 0                                     | 0                                        |
| 6322163   | IRR1    | 0                          | 1.04                     | 1                        | 1                           | 1.22                      | 1                        | 3                           | 0                         | 0                        | 0                           | 0                                      | 0                                     | 0                                        |
| 398366099 | RRP41   | 0                          | 0                        | 0                        | 0                           | 0                         | 0                        | 0                           | 0                         | 0                        | 0                           | 0                                      | 0                                     | 0                                        |
| 398366555 | UBA2    | 0                          | 0                        | 0                        | 0                           | 0                         | 0                        | 0                           | 0                         | 0                        | 0                           | 0                                      | 0                                     | 0                                        |
| 6323670   | TAP42   | 0                          | 0                        | 0                        | 0                           | 17.76                     | 4                        | 8                           | 0                         | 0                        | 0                           | 0                                      | 0                                     | 0                                        |
| 6323004   | SSA2    | 191                        | 19.56                    | 7                        | 31                          | 59.78                     | 26                       | 311                         | 26.92                     | 13                       | 49                          | 6.42                                   | 3                                     | 11                                       |
| 6319505   | RPL4A   | 29                         | 22.10                    | 5                        | 32                          | 30.94                     | 8                        | 46                          | 2.76                      | 1                        | 1                           | 0                                      | 0                                     | 0                                        |
| 398364991 | RPL4B   | 26                         | 22.10                    | 5                        | 32                          | 30.94                     | 8                        | 46                          | 2.76                      | 1                        | 1                           | 0                                      | 0                                     | 0                                        |
| 398365303 | RPL43B  | 320                        | 29.35                    | 2                        | 19                          | 29.35                     | 3                        | 12                          | 0                         | 0                        | 0                           | 0                                      | 0                                     | 0                                        |
| 398364349 | RPL2A   | 32                         | 24.41                    | 3                        | 3                           | 27.17                     | 4                        | 8                           | 4.33                      | 1                        | 6                           | 0                                      | 0                                     | 0                                        |
| 6325337   | TEF1    | 71                         | 28.17                    | 7                        | 37                          | 55.68                     | 18                       | 1023                        | 12.66                     | 6                        | 196                         | 11.79                                  | 6                                     | 206                                      |
| 144228166 | SSA1    | 206                        | 16.20                    | 5                        | 20                          | 62.15                     | 28                       | 308                         | 28.35                     | 14                       | 51                          | 8.26                                   | 4                                     | 21                                       |
| 6319559   | RPL19A  | 25                         | 20.11                    | 3                        | 5                           | 14.29                     | 2                        | 5                           | 0                         | 0                        | 0                           | 0                                      | 0                                     | 0                                        |
| 6320065   | RPL35A  | 170                        | 0                        | 0                        | 0                           | 11.67                     | 1                        | 3                           | 0                         | 0                        | 0                           | 0                                      | 0                                     | 0                                        |
| 398365603 | RPS4A   | 28                         | 3.83                     | 1                        | 1                           | 24.14                     | 4                        | 21                          | 6.51                      | 2                        | 2                           | 3.83                                   | 1                                     | 5                                        |
| 398365321 | RPS6B   | 163                        | 0                        | 0                        | 0                           | 13.56                     | 2                        | 10                          | 15.25                     | 3                        | 4                           | 11.44                                  | 2                                     | 13                                       |
| 398364655 | SSA4    | 75                         | 6.23                     | 3                        | 14                          | 16.20                     | 9                        | 93                          | 9.66                      | 5                        | 26                          | 3.89                                   | 2                                     | 10                                       |

Table S1 - Smith-Kinnaman, *et al* (2014) Abbreviations: %SC = percent sequence coverage, UP = unique peptides, PSM = peptide spectrum matches

| Accession | Acronym | # PSM<br>TAP_Rtr1_<br>WT_1 | %SC<br>TAP_Rtr1_<br>WT_2 | UP<br>TAP_Rtr1_<br>WT_2 | # PSM<br>TAP_Rtr1_<br>WT_2 | %SC<br>TAP_Rtr1_<br>WT_3 | UP<br>TAP_Rtr1_<br>WT_3 | # PSM<br>TAP_Rtr1_<br>WT_3 | %SC<br>TAP_Rtr1_<br>WT_4 | UP<br>TAP_Rtr1_<br>WT_4 | # PSM<br>TAP_Rtr1_<br>WT_4 | %SC<br>TAP_Rtr1_<br>ctk1_del<br>etion | UP<br>TAP_Rtr1_<br>ctk1_del<br>etion | # PSM<br>TAP_Rtr1_<br>ctk1_del<br>etion |
|-----------|---------|----------------------------|--------------------------|-------------------------|----------------------------|--------------------------|-------------------------|----------------------------|--------------------------|-------------------------|----------------------------|---------------------------------------|--------------------------------------|-----------------------------------------|
| 398366603 | RPS17B  | 350                        | 26.47                    | 3                       | 9                          | 33.82                    | 4                       | 12                         | 8.82                     | 1                       | 3                          | 11.76                                 | 1                                    | 1                                       |
| 6324533   | RPS15   | 332                        | 30.28                    | 3                       | 13                         | 22.54                    | 2                       | 12                         | 7.75                     | 1                       | 1                          | 0                                     | 0                                    | 0                                       |
| 6323104   | RPL10   | 7                          | 4.98                     | 1                       | 5                          | 18.10                    | 2                       | 11                         | 0                        | 0                       | 0                          | 0                                     | 0                                    | 0                                       |
| 6319396   | SSA3    | 62                         | 6.16                     | 3                       | 6                          | 14.79                    | 9                       | 90                         | 11.86                    | 6                       | 16                         | 2.00                                  | 1                                    | 1                                       |
| 6321786   | RPL14B  | 25                         | 21.74                    | 2                       | 17                         | 28.26                    | 4                       | 65                         | 13.04                    | 2                       | 2                          | 0                                     | 0                                    | 0                                       |
| 6322847   | RPL14A  | 25                         | 21.74                    | 2                       | 17                         | 28.26                    | 4                       | 65                         | 13.04                    | 2                       | 2                          | 0                                     | 0                                    | 0                                       |
| 6324670   | RPS7A   | 92                         | 44.21                    | 6                       | 31                         | 41.05                    | 6                       | 28                         | 5.26                     | 1                       | 1                          | 0                                     | 0                                    | 0                                       |
| 6322668   | RPL17A  | 107                        | 15.76                    | 2                       | 18                         | 15.76                    | 2                       | 4                          | 0                        | 0                       | 0                          | 0                                     | 0                                    | 0                                       |
| 398365285 | CAX4    | 0                          | 0                        | 0                       | 0                          | 0                        | 0                       | 0                          | 0                        | 0                       | 0                          | 0                                     | 0                                    | 0                                       |
| 6322284   | RPL17B  | 91                         | 15.76                    | 2                       | 18                         | 15.76                    | 2                       | 4                          | 0                        | 0                       | 0                          | 0                                     | 0                                    | 0                                       |
| 398364883 | RPS7B   | 142                        | 21.58                    | 4                       | 7                          | 30.53                    | 5                       | 23                         | 5.26                     | 1                       | 1                          | 0                                     | 0                                    | 0                                       |
| 6323791   | RPL13B  | 52                         | 13.07                    | 1                       | 2                          | 15.08                    | 3                       | 13                         | 15.58                    | 3                       | 5                          | 5.53                                  | 1                                    | 2                                       |
| 6320121   | RPL13A  | 49                         | 13.07                    | 1                       | 2                          | 15.08                    | 3                       | 13                         | 15.58                    | 3                       | 5                          | 5.53                                  | 1                                    | 2                                       |
| 6324120   | SSB2    | 139                        | 20.07                    | 7                       | 32                         | 60.85                    | 24                      | 266                        | 16.80                    | 9                       | 28                         | 15.99                                 | 7                                    | 40                                      |
| 6323577   | RPS1B   | 77                         | 3.92                     | 1                       | 2                          | 17.25                    | 4                       | 19                         | 8.24                     | 2                       | 2                          | 5.10                                  | 1                                    | 1                                       |
| 6325157   | ATG21   | 0                          | 0                        | 0                       | 0                          | 0                        | 0                       | 0                          | 0                        | 0                       | 0                          | 7.66                                  | 1                                    | 1                                       |
| 6323474   | RPS1A   | 62                         | 3.92                     | 1                       | 2                          | 17.25                    | 4                       | 19                         | 3.14                     | 1                       | 1                          | 0                                     | 0                                    | 0                                       |
| 398364725 | RPL23B  | 78                         | 25.55                    | 2                       | 5                          | 35.04                    | 5                       | 27                         | 10.95                    | 1                       | 1                          | 0                                     | 0                                    | 0                                       |
| 6319972   | SSB1    | 133                        | 23.49                    | 8                       | 36                         | 56.44                    | 23                      | 270                        | 16.80                    | 9                       | 28                         | 15.99                                 | 7                                    | 40                                      |
| 154200011 | RPL20B  | 16                         | 0                        | 0                       | 0                          | 10.47                    | 1                       | 1                          | 0                        | 0                       | 0                          | 0                                     | 0                                    | 0                                       |
| 6322989   | UBI4    | 24                         | 0                        | 0                       | 0                          | 32.89                    | 2                       | 78                         | 32.89                    | 2                       | 34                         | 21.05                                 | 1                                    | 1                                       |
| 9755341   | RPS16A  | 88                         | 18.18                    | 2                       | 3                          | 39.86                    | 5                       | 23                         | 0                        | 0                       | 0                          | 0                                     | 0                                    | 0                                       |
| 6319378   | RPL32   | 105                        | 0                        | 0                       | 0                          | 22.31                    | 2                       | 6                          | 0                        | 0                       | 0                          | 0                                     | 0                                    | 0                                       |
| 6325061   | APL5    | 0                          | 0                        | 0                       | 0                          | 11.16                    | 7                       | 16                         | 0                        | 0                       | 0                          | 0                                     | 0                                    | 0                                       |
| 398364505 | RPS3    | 53                         | 0                        | 0                       | 0                          | 42.08                    | 7                       | 15                         | 5.42                     | 1                       | 1                          | 12.50                                 | 2                                    | 13                                      |
| 398365351 | RPS13   | 46                         | 35.10                    | 4                       | 12                         | 19.21                    | 2                       | 8                          | 12.58                    | 2                       | 2                          | 0                                     | 0                                    | 0                                       |
| 6324260   | RPL16B  | 2                          | 6.06                     | 1                       | 1                          | 14.14                    | 2                       | 11                         | 0                        | 0                       | 0                          | 7.58                                  | 1                                    | 1                                       |
| 398365605 | RPS30B  | 41                         | 15.87                    | 1                       | 1                          | 15.87                    | 1                       | 2                          | 15.87                    | 1                       | 1                          | 0                                     | 0                                    | 0                                       |
| 6323481   | RPL6B   | 1                          | 8.52                     | 1                       | 2                          | 14.20                    | 2                       | 5                          | 4.55                     | 1                       | 2                          | 0                                     | 0                                    | 0                                       |
| 398365377 | RPS9B   | 19                         | 0                        | 0                       | 0                          | 0                        | 0                       | 0                          | 4.62                     | 1                       | 2                          | 8.21                                  | 1                                    | 4                                       |
| 6324265   | YDJ1    | 3                          | 17.36                    | 3                       | 5                          | 36.43                    | 12                      | 67                         | 14.18                    | 5                       | 11                         | 0                                     | 0                                    | 0                                       |
| 398364745 | ATP7    | 14                         | 14.37                    | 1                       | 4                          | 14.37                    | 1                       | 1                          | 0                        | 0                       | 0                          | 0                                     | 0                                    | 0                                       |
| 6321464   | RPS25A  | 150                        | 31.48                    | 3                       | 7                          | 0                        | 0                       | 0                          | 0                        | 0                       | 0                          | 0                                     | 0                                    | 0                                       |
| 6323077   | RPS0B   | 17                         | 5.16                     | 1                       | 2                          | 37.70                    | 6                       | 26                         | 5.16                     | 1                       | 1                          | 0                                     | 0                                    | 0                                       |
| 398365071 | RPS11A  | 9                          | 7.05                     | 1                       | 2                          | 0                        | 0                       | 0                          | 5.13                     | 1                       | 1                          | 0                                     | 0                                    | 0                                       |
| 6321653   | RPS0A   | 17                         | 5.16                     | 1                       | 2                          | 37.70                    | 6                       | 26                         | 5.16                     | 1                       | 1                          | 0                                     | 0                                    | 0                                       |
| 6323465   | CNA1    | 56                         | 5.79                     | 2                       | 7                          | 2.53                     | 1                       | 2                          | 0                        | 0                       | 0                          | 0                                     | 0                                    | 0                                       |

Table S1 - Smith-Kinnaman, *et al* (2014) Abbreviations: %SC = percent sequence coverage, UP = unique peptides, PSM = peptide spectrum matches

| Accession | Acronym | # PSM<br>TAP_Rtr1_<br>WT_1 | %SC<br>TAP_Rtr1_<br>WT_2 | UP<br>TAP_Rtr1_<br>WT_2 | # PSM<br>TAP_Rtr1_<br>WT_2 | %SC<br>TAP_Rtr1_<br>WT_3 | UP<br>TAP_Rtr1_<br>WT_3 | # PSM<br>TAP_Rtr1_<br>WT_3 | %SC<br>TAP_Rtr1_<br>WT_4 | UP<br>TAP_Rtr1_<br>WT_4 | # PSM<br>TAP_Rtr1_<br>WT_4 | %SC<br>TAP_Rtr1_<br>ctk1_del<br>etion | UP<br>TAP_Rtr1_<br>ctk1_del<br>etion | # PSM<br>TAP_Rtr1_<br>ctk1_del<br>etion |
|-----------|---------|----------------------------|--------------------------|-------------------------|----------------------------|--------------------------|-------------------------|----------------------------|--------------------------|-------------------------|----------------------------|---------------------------------------|--------------------------------------|-----------------------------------------|
| 6321335   | RPL28   | 14                         | 7.38                     | 2                       | 2                          | 10.07                    | 1                       | 2                          | 0                        | 0                       | 0                          | 0                                     | 0                                    | 0                                       |
| 6322505   | SSC1    | 32                         | 2.75                     | 1                       | 1                          | 31.80                    | 13                      | 64                         | 0                        | 0                       | 0                          | 0                                     | 0                                    | 0                                       |
| 6323567   | RPL6A   | 1                          | 8.52                     | 1                       | 2                          | 8.52                     | 1                       | 4                          | 4.55                     | 1                       | 2                          | 0                                     | 0                                    | 0                                       |
| 6321754   | RPL8A   | 45                         | 4.30                     | 1                       | 2                          | 34.77                    | 7                       | 20                         | 12.11                    | 3                       | 8                          | 4.30                                  | 1                                    | 1                                       |
| 6322984   | RPL8B   | 47                         | 4.30                     | 1                       | 2                          | 34.77                    | 7                       | 20                         | 12.11                    | 3                       | 8                          | 4.30                                  | 1                                    | 1                                       |
| 6323615   | RPS18B  | 18                         | 8.22                     | 1                       | 1                          | 27.40                    | 4                       | 6                          | 15.07                    | 2                       | 3                          | 7.53                                  | 1                                    | 1                                       |
| 398366307 | RPA190  | 0                          | 0                        | 0                       | 0                          | 14.30                    | 14                      | 33                         | 0                        | 0                       | 0                          | 0                                     | 0                                    | 0                                       |
| 6324637   | RPL3    | 0                          | 0                        | 0                       | 0                          | 2.07                     | 1                       | 3                          | 2.07                     | 1                       | 1                          | 0                                     | 0                                    | 0                                       |
| 6320128   | RPL31A  | 13                         | 28.32                    | 3                       | 29                         | 14.16                    | 1                       | 11                         | 0                        | 0                       | 0                          | 0                                     | 0                                    | 0                                       |
| 398366143 | RPL31B  | 13                         | 20.35                    | 2                       | 28                         | 14.16                    | 1                       | 11                         | 0                        | 0                       | 0                          | 0                                     | 0                                    | 0                                       |
| 398365761 | RPS23A  | 2                          | 7.59                     | 1                       | 3                          | 7.59                     | 1                       | 2                          | 0                        | 0                       | 0                          | 0                                     | 0                                    | 0                                       |
| 6322137   | RPL34B  | 1                          | 14.05                    | 1                       | 2                          | 0                        | 0                       | 0                          | 0                        | 0                       | 0                          | 0                                     | 0                                    | 0                                       |
| 6321315   | RPS2    | 19                         | 0                        | 0                       | 0                          | 19.29                    | 3                       | 11                         | 0                        | 0                       | 0                          | 0                                     | 0                                    | 0                                       |
| 6320949   | RPS8B   | 13                         | 6.50                     | 1                       | 1                          | 35.50                    | 5                       | 15                         | 0                        | 0                       | 0                          | 0                                     | 0                                    | 0                                       |
| 6321798   | RPL27A  | 2                          | 17.65                    | 2                       | 5                          | 25.74                    | 3                       | 12                         | 10.29                    | 1                       | 1                          | 16.91                                 | 2                                    | 8                                       |
| 6325176   | RPS9A   | 18                         | 0                        | 0                       | 0                          | 0                        | 0                       | 0                          | 4.57                     | 1                       | 2                          | 0                                     | 0                                    | 0                                       |
| 86558907  | RHR2    | 46                         | 0                        | 0                       | 0                          | 52.00                    | 10                      | 129                        | 0                        | 0                       | 0                          | 0                                     | 0                                    | 0                                       |
| 6322058   | RPL16A  | 0                          | 0                        | 0                       | 0                          | 6.03                     | 1                       | 1                          | 0                        | 0                       | 0                          | 0                                     | 0                                    | 0                                       |
| 6324027   | RPS19B  | 291                        | 18.06                    | 2                       | 13                         | 31.94                    | 3                       | 44                         | 6.25                     | 1                       | 4                          | 6.25                                  | 1                                    | 3                                       |
| 6323090   | RPL22A  | 48                         | 18.18                    | 1                       | 6                          | 18.18                    | 1                       | 23                         | 0                        | 0                       | 0                          | 0                                     | 0                                    | 0                                       |
| 6320142   | RPS29B  | 9                          | 0                        | 0                       | 0                          | 14.29                    | 1                       | 2                          | 0                        | 0                       | 0                          | 0                                     | 0                                    | 0                                       |
| 6324807   | KIN4    | 0                          | 0                        | 0                       | 0                          | 0                        | 0                       | 0                          | 0                        | 0                       | 0                          | 0                                     | 0                                    | 0                                       |
| 6321522   | RPL11B  | 22                         | 0                        | 0                       | 0                          | 7.47                     | 1                       | 2                          | 0                        | 0                       | 0                          | 0                                     | 0                                    | 0                                       |
| 6322583   | RPS5    | 82                         | 6.67                     | 1                       | 9                          | 20.89                    | 4                       | 56                         | 4.89                     | 1                       | 2                          | 4.89                                  | 1                                    | 1                                       |
| 6325126   | RPL5    | 4                          | 5.72                     | 1                       | 1                          | 8.75                     | 2                       | 6                          | 3.03                     | 1                       | 1                          | 0                                     | 0                                    | 0                                       |
| 6323073   | PDC1    | 42                         | 19.72                    | 6                       | 16                         | 36.41                    | 12                      | 62                         | 1.78                     | 1                       | 1                          | 0                                     | 0                                    | 0                                       |
| 398366277 | VMA4    | 44                         | 6.44                     | 1                       | 2                          | 41.20                    | 8                       | 51                         | 20.17                    | 4                       | 6                          | 0                                     | 0                                    | 0                                       |
| 6323824   | HOT1    | 0                          | 0                        | 0                       | 0                          | 0                        | 0                       | 0                          | 0                        | 0                       | 0                          | 0                                     | 0                                    | 0                                       |
| 6325066   | NAB3    | 0                          | 0                        | 0                       | 0                          | 0                        | 0                       | 0                          | 0                        | 0                       | 0                          | 0                                     | 0                                    | 0                                       |
| 398364517 | RPS24A  | 47                         | 18.52                    | 2                       | 8                          | 24.44                    | 3                       | 6                          | 6.67                     | 1                       | 1                          | 0                                     | 0                                    | 0                                       |
| 6321362   | RPL7A   | 17                         | 13.11                    | 2                       | 11                         | 27.05                    | 5                       | 14                         | 0                        | 0                       | 0                          | 0                                     | 0                                    | 0                                       |
| 6325058   | RPL7B   | 17                         | 13.11                    | 2                       | 11                         | 27.05                    | 5                       | 14                         | 0                        | 0                       | 0                          | 0                                     | 0                                    | 0                                       |
| 37362649  | GUS1    | 1                          | 0                        | 0                       | 0                          | 23.31                    | 12                      | 45                         | 13.28                    | 9                       | 37                         | 1.55                                  | 1                                    | 1                                       |
| 398365909 | RPL24B  | 2                          | 9.03                     | 1                       | 1                          | 0                        | 0                       | 0                          | 0                        | 0                       | 0                          | 0                                     | 0                                    | 0                                       |
| 6324707   | EFT1    | 32                         | 10.81                    | 5                       | 9                          | 53.92                    | 31                      | 257                        | 2.85                     | 2                       | 2                          | 1.66                                  | 1                                    | 2                                       |
| 6323376   | RPL26A  | 68                         | 18.90                    | 2                       | 7                          | 6.30                     | 1                       | 1                          | 7.09                     | 1                       | 1                          | 6.30                                  | 1                                    | 14                                      |
| 116006491 | RPL26B  | 77                         | 18.90                    | 2                       | 7                          | 6.30                     | 1                       | 1                          | 7.09                     | 1                       | 1                          | 6.30                                  | 1                                    | 14                                      |

Table S1 - Smith-Kinnaman, *et al* (2014) Abbreviations: %SC = percent sequence coverage, UP = unique peptides, PSM = peptide spectrum matches

| Accession | Acronym | # PSM<br>TAP_Rtr1_<br>WT_1 | %SC<br>TAP_Rtr1_<br>WT_2 | UP<br>TAP_Rtr1_<br>WT_2 | # PSM<br>TAP_Rtr1_<br>WT_2 | %SC<br>TAP_Rtr1_<br>WT_3 | UP<br>TAP_Rtr1_<br>WT_3 | # PSM<br>TAP_Rtr1_<br>WT_3 | %SC<br>TAP_Rtr1_<br>WT_4 | UP<br>TAP_Rtr1_<br>WT_4 | # PSM<br>TAP_Rtr1_<br>WT_4 | %SC<br>TAP_Rtr1_<br>ctk1_del<br>etion | UP<br>TAP_Rtr1_<br>ctk1_del<br>etion | # PSM<br>TAP_Rtr1_<br>ctk1_del<br>etion |
|-----------|---------|----------------------------|--------------------------|-------------------------|----------------------------|--------------------------|-------------------------|----------------------------|--------------------------|-------------------------|----------------------------|---------------------------------------|--------------------------------------|-----------------------------------------|
| 6325006   | RPL36B  | 116                        | 0                        | 0                       | 0                          | 19.00                    | 2                       | 5                          | 0                        | 0                       | 0                          | 0                                     | 0                                    | 0                                       |
| 6323848   | RPL36A  | 116                        | 0                        | 0                       | 0                          | 19.00                    | 2                       | 5                          | 0                        | 0                       | 0                          | 0                                     | 0                                    | 0                                       |
| 398366579 | RPL12B  | 14                         | 0                        | 0                       | 0                          | 28.48                    | 3                       | 7                          | 9.09                     | 1                       | 2                          | 0                                     | 0                                    | 0                                       |
| 6321540   | NOP7    | 0                          | 0                        | 0                       | 0                          | 7.60                     | 3                       | 6                          | 1.65                     | 1                       | 1                          | 0                                     | 0                                    | 0                                       |
| 398365599 | PDC6    | 15                         | 3.37                     | 1                       | 2                          | 3.37                     | 1                       | 3                          | 0                        | 0                       | 0                          | 0                                     | 0                                    | 0                                       |
| 6323163   | PDC5    | 15                         | 3.37                     | 1                       | 2                          | 5.15                     | 2                       | 4                          | 0                        | 0                       | 0                          | 0                                     | 0                                    | 0                                       |
| 6323583   | CMP2    | 23                         | 3.81                     | 1                       | 2                          | 0                        | 0                       | 0                          | 1.82                     | 1                       | 1                          | 0                                     | 0                                    | 0                                       |
| 398365991 | CLC1    | 28                         | 6.87                     | 1                       | 3                          | 6.87                     | 1                       | 1                          | 0                        | 0                       | 0                          | 0                                     | 0                                    | 0                                       |
| 37362619  | RXT2    | 0                          | 0                        | 0                       | 0                          | 3.49                     | 1                       | 2                          | 0                        | 0                       | 0                          | 0                                     | 0                                    | 0                                       |
| 10383793  | RPS14A  | 59                         | 8.03                     | 1                       | 3                          | 51.82                    | 6                       | 25                         | 0                        | 0                       | 0                          | 9.49                                  | 1                                    | 9                                       |
| 6322271   | RPS22A  | 13                         | 12.31                    | 1                       | 6                          | 19.23                    | 2                       | 15                         | 17.69                    | 2                       | 3                          | 0                                     | 0                                    | 0                                       |
| 6321407   | RPL24A  | 3                          | 9.03                     | 1                       | 1                          | 0                        | 0                       | 0                          | 0                        | 0                       | 0                          | 0                                     | 0                                    | 0                                       |
| 6323357   | RPL38   | 48                         | 33.33                    | 2                       | 6                          | 19.23                    | 1                       | 23                         | 0                        | 0                       | 0                          | 0                                     | 0                                    | 0                                       |
| 398366183 | HTB1    | 5                          | 0                        | 0                       | 0                          | 18.32                    | 2                       | 10                         | 0                        | 0                       | 0                          | 11.45                                 | 1                                    | 3                                       |
| 398364287 | GCN1    | 0                          | 0                        | 0                       | 0                          | 18.90                    | 39                      | 116                        | 0                        | 0                       | 0                          | 0                                     | 0                                    | 0                                       |
| 6320016   | VMA1    | 3                          | 0                        | 0                       | 0                          | 23.81                    | 18                      | 89                         | 0                        | 0                       | 0                          | 1.77                                  | 2                                    | 30                                      |
| 14318481  | TUB2    | 6                          | 0                        | 0                       | 0                          | 42.67                    | 13                      | 62                         | 0                        | 0                       | 0                          | 0                                     | 0                                    | 0                                       |
| 398364585 | KAR2    | 19                         | 0                        | 0                       | 0                          | 15.84                    | 7                       | 27                         | 1.76                     | 1                       | 13                         | 1.76                                  | 1                                    | 9                                       |
| 6323196   | RPS31   | 0                          | 0                        | 0                       | 0                          | 0                        | 0                       | 0                          | 0                        | 0                       | 0                          | 0                                     | 0                                    | 0                                       |
| 6321013   | PAB1    | 132                        | 31.02                    | 10                      | 57                         | 33.10                    | 10                      | 42                         | 12.82                    | 6                       | 19                         | 6.76                                  | 3                                    | 23                                      |
| 6324993   | FUM1    | 0                          | 0                        | 0                       | 0                          | 0                        | 0                       | 0                          | 0                        | 0                       | 0                          | 0                                     | 0                                    | 0                                       |
| 398366075 | RPS29A  | 13                         | 0                        | 0                       | 0                          | 0                        | 0                       | 0                          | 0                        | 0                       | 0                          | 0                                     | 0                                    | 0                                       |
| 6322755   | YJU2    | 0                          | 0                        | 0                       | 0                          | 3.96                     | 1                       | 2                          | 0                        | 0                       | 0                          | 0                                     | 0                                    | 0                                       |
| 398366059 | PLP2    | 0                          | 0                        | 0                       | 0                          | 0                        | 0                       | 0                          | 0                        | 0                       | 0                          | 0                                     | 0                                    | 0                                       |
| 6320718   | SMT3    | 0                          | 0                        | 0                       | 0                          | 0                        | 0                       | 0                          | 0                        | 0                       | 0                          | 0                                     | 0                                    | 0                                       |
| 398365031 | YBR139W | 1                          | 0                        | 0                       | 0                          | 13.39                    | 4                       | 14                         | 0                        | 0                       | 0                          | 0                                     | 0                                    | 0                                       |
| 6321850   | FYV4    | 0                          | 0                        | 0                       | 0                          | 0                        | 0                       | 0                          | 0                        | 0                       | 0                          | 0                                     | 0                                    | 0                                       |
| 398366083 | TDH3    | 286                        | 28.61                    | 5                       | 15                         | 66.27                    | 14                      | 354                        | 14.16                    | 5                       | 9                          | 4.52                                  | 1                                    | 28                                      |
| 6319279   | CDC19   | 107                        | 3.60                     | 1                       | 1                          | 65.40                    | 26                      | 504                        | 21.80                    | 9                       | 14                         | 32.80                                 | 12                                   | 206                                     |
| 6322468   | TDH2    | 257                        | 15.06                    | 3                       | 7                          | 46.99                    | 12                      | 245                        | 14.16                    | 5                       | 9                          | 4.52                                  | 1                                    | 28                                      |
| 6321249   | RPS26A  | 23                         | 5.88                     | 1                       | 1                          | 12.61                    | 1                       | 14                         | 0                        | 0                       | 0                          | 12.61                                 | 1                                    | 3                                       |
| 6321772   | RPS20   | 1                          | 0                        | 0                       | 0                          | 22.31                    | 3                       | 11                         | 0                        | 0                       | 0                          | 29.75                                 | 3                                    | 27                                      |
| 14318474  | SEC53   | 1                          | 10.24                    | 1                       | 1                          | 14.17                    | 3                       | 5                          | 0                        | 0                       | 0                          | 0                                     | 0                                    | 0                                       |
| 6320589   | YRA1    | 33                         | 0                        | 0                       | 0                          | 5.75                     | 1                       | 4                          | 18.58                    | 4                       | 9                          | 0                                     | 0                                    | 0                                       |
| 6320805   | ECM10   | 3                          | 2.80                     | 1                       | 1                          | 3.73                     | 2                       | 6                          | 0                        | 0                       | 0                          | 0                                     | 0                                    | 0                                       |
| 6323776   | ECM16   | 0                          | 0                        | 0                       | 0                          | 3.55                     | 3                       | 4                          | 0                        | 0                       | 0                          | 0                                     | 0                                    | 0                                       |
| 6320596   | RVS167  | 0                          | 4.15                     | 1                       | 1                          | 32.99                    | 10                      | 87                         | 0                        | 0                       | 0                          | 0                                     | 0                                    | 0                                       |

Table S1 - Smith-Kinnaman, *et al* (2014) Abbreviations: %SC = percent sequence coverage, UP = unique peptides, PSM = peptide spectrum matches

| Accession | Acronym  | # PSM<br>TAP_Rtr1_<br>WT_1 | %SC<br>TAP_Rtr1_<br>WT_2 | UP<br>TAP_Rtr1_<br>WT_2 | # PSM<br>TAP_Rtr1_<br>WT_2 | %SC<br>TAP_Rtr1_<br>WT_3 | UP<br>TAP_Rtr1_<br>WT_3 | # PSM<br>TAP_Rtr1_<br>WT_3 | %SC<br>TAP_Rtr1_<br>WT_4 | UP<br>TAP_Rtr1_<br>WT_4 | # PSM<br>TAP_Rtr1_<br>WT_4 | %SC<br>TAP_Rtr1_<br>ctk1_del<br>etion | UP<br>TAP_Rtr1_<br>ctk1_del<br>etion | # PSM<br>TAP_Rtr1_<br>ctk1_del<br>etion |
|-----------|----------|----------------------------|--------------------------|-------------------------|----------------------------|--------------------------|-------------------------|----------------------------|--------------------------|-------------------------|----------------------------|---------------------------------------|--------------------------------------|-----------------------------------------|
| 398366359 | SLH1     | 0                          | 0                        | 0                       | 0                          | 1.63                     | 2                       | 3                          | 0                        | 0                       | 0                          | 0                                     | 0                                    | 0                                       |
| 6324321   | SIS1     | 10                         | 0                        | 0                       | 0                          | 12.50                    | 3                       | 9                          | 9.38                     | 3                       | 5                          | 7.39                                  | 2                                    | 7                                       |
| 6319447   | NCL1     | 0                          | 0                        | 0                       | 0                          | 0                        | 0                       | 0                          | 0                        | 0                       | 0                          | 0                                     | 0                                    | 0                                       |
| 6323112   | EMP70    | 0                          | 0                        | 0                       | 0                          | 3.90                     | 1                       | 1                          | 0                        | 0                       | 0                          | 0                                     | 0                                    | 0                                       |
| 6324595   | SFM1     | 0                          | 0                        | 0                       | 0                          | 8.92                     | 1                       | 6                          | 0                        | 0                       | 0                          | 0                                     | 0                                    | 0                                       |
| 330443411 | UBP13    | 0                          | 0                        | 0                       | 0                          | 6.83                     | 3                       | 12                         | 0                        | 0                       | 0                          | 0                                     | 0                                    | 0                                       |
| 6323868   | EFR3     | 0                          | 0                        | 0                       | 0                          | 0                        | 0                       | 0                          | 0                        | 0                       | 0                          | 0                                     | 0                                    | 0                                       |
| 330443676 | CDC34    | 0                          | 0                        | 0                       | 0                          | 17.12                    | 5                       | 36                         | 0                        | 0                       | 0                          | 0                                     | 0                                    | 0                                       |
| 6320615   | TRS120   | 0                          | 0                        | 0                       | 0                          | 0                        | 0                       | 0                          | 0                        | 0                       | 0                          | 0                                     | 0                                    | 0                                       |
| 6323487   | FMP27    | 0                          | 0                        | 0                       | 0                          | 0                        | 0                       | 0                          | 0                        | 0                       | 0                          | 0                                     | 0                                    | 0                                       |
| 6320231   | REG1     | 0                          | 0                        | 0                       | 0                          | 0.89                     | 1                       | 1                          | 0                        | 0                       | 0                          | 0                                     | 0                                    | 0                                       |
| 6324585   | AUS1     | 0                          | 0                        | 0                       | 0                          | 0                        | 0                       | 0                          | 0                        | 0                       | 0                          | 0                                     | 0                                    | 0                                       |
| 6325048   | RKM1     | 0                          | 0                        | 0                       | 0                          | 0                        | 0                       | 0                          | 0                        | 0                       | 0                          | 0                                     | 0                                    | 0                                       |
| 6323732   | SEG1     | 0                          | 0                        | 0                       | 0                          | 0                        | 0                       | 0                          | 0                        | 0                       | 0                          | 0                                     | 0                                    | 0                                       |
| 398364779 | YGL041W- | 6                          | 13.64                    | 1                       | 2                          | 13.64                    | 1                       | 2                          | 0                        | 0                       | 0                          | 0                                     | 0                                    | 0                                       |
| 398365827 | CAF130   | 0                          | 0                        | 0                       | 0                          | 1.07                     | 1                       | 1                          | 0                        | 0                       | 0                          | 0                                     | 0                                    | 0                                       |
| 6325063   | RSA1     | 0                          | 0                        | 0                       | 0                          | 3.15                     | 1                       | 1                          | 0                        | 0                       | 0                          | 0                                     | 0                                    | 0                                       |
| 398365559 | MSH6     | 0                          | 0                        | 0                       | 0                          | 1.05                     | 1                       | 1                          | 0                        | 0                       | 0                          | 0                                     | 0                                    | 0                                       |
| 398365727 | YNR034W- | 0                          | 0                        | 0                       | 0                          | 0                        | 0                       | 0                          | 0                        | 0                       | 0                          | 0                                     | 0                                    | 0                                       |
| 6323683   | YET2     | 0                          | 0                        | 0                       | 0                          | 0                        | 0                       | 0                          | 0                        | 0                       | 0                          | 0                                     | 0                                    | 0                                       |
| 330443366 | GPB2     | 0                          | 0                        | 0                       | 0                          | 0                        | 0                       | 0                          | 0                        | 0                       | 0                          | 0                                     | 0                                    | 0                                       |
| 6325012   | HUT1     | 0                          | 0                        | 0                       | 0                          | 0                        | 0                       | 0                          | 0                        | 0                       | 0                          | 0                                     | 0                                    | 0                                       |
| 99030927  | KKQ8     | 0                          | 0                        | 0                       | 0                          | 0                        | 0                       | 0                          | 0                        | 0                       | 0                          | 0                                     | 0                                    | 0                                       |
| 398364567 | MAD1     | 0                          | 0                        | 0                       | 0                          | 0                        | 0                       | 0                          | 0                        | 0                       | 0                          | 0                                     | 0                                    | 0                                       |
| 6320763   | RMD6     | 0                          | 0                        | 0                       | 0                          | 0                        | 0                       | 0                          | 0                        | 0                       | 0                          | 0                                     | 0                                    | 0                                       |
| 398365009 | MEC1     | 0                          | 0                        | 0                       | 0                          | 0                        | 0                       | 0                          | 0                        | 0                       | 0                          | 0                                     | 0                                    | 0                                       |
| 398364407 | RPL9A    | 18                         | 0                        | 0                       | 0                          | 23.04                    | 3                       | 16                         | 6.28                     | 1                       | 1                          | 0                                     | 0                                    | 0                                       |
| 6324298   | HHF2     | 22                         | 0                        | 0                       | 0                          | 33.01                    | 3                       | 11                         | 29.13                    | 3                       | 9                          | 0                                     | 0                                    | 0                                       |
| 6324262   | RPL9B    | 7                          | 0                        | 0                       | 0                          | 23.04                    | 3                       | 8                          | 6.28                     | 1                       | 1                          | 0                                     | 0                                    | 0                                       |
| 398364523 | TDH1     | 86                         | 4.22                     | 1                       | 1                          | 48.19                    | 11                      | 182                        | 16.27                    | 5                       | 12                         | 4.52                                  | 1                                    | 28                                      |
| 398364951 | VMA2     | 31                         | 10.06                    | 3                       | 9                          | 66.54                    | 26                      | 515                        | 5.80                     | 3                       | 4                          | 0                                     | 0                                    | 0                                       |
| 6321333   | ARC1     | 0                          | 0                        | 0                       | 0                          | 25.00                    | 6                       | 40                         | 8.24                     | 3                       | 10                         | 0                                     | 0                                    | 0                                       |
| 6321408   | RPL30    | 31                         | 16.19                    | 1                       | 1                          | 45.71                    | 3                       | 19                         | 0                        | 0                       | 0                          | 0                                     | 0                                    | 0                                       |
| 6324445   | RPL25    | 12                         | 0                        | 0                       | 0                          | 19.01                    | 2                       | 3                          | 9.15                     | 1                       | 14                         | 0                                     | 0                                    | 0                                       |
| 6325114   | RPL33A   | 0                          | 0                        | 0                       | 0                          | 24.30                    | 2                       | 5                          | 0                        | 0                       | 0                          | 0                                     | 0                                    | 0                                       |
| 398365881 | RPL33B   | 0                          | 0                        | 0                       | 0                          | 24.30                    | 2                       | 4                          | 0                        | 0                       | 0                          | 0                                     | 0                                    | 0                                       |
| 398364339 | THS1     | 12                         | 0                        | 0                       | 0                          | 5.31                     | 3                       | 6                          | 6.27                     | 4                       | 7                          | 0                                     | 0                                    | 0                                       |





Table S1 - Smith-Kinnaman, *et al* (2014) Abbreviations: %SC = percent sequence coverage, UP = unique peptides, PSM = peptide spectrum matches

| Accession | Acronym | # PSM<br>TAP_Rtr1_<br>WT_1 | %SC<br>TAP_Rtr1_<br>WT_2 | UP<br>TAP_Rtr1_<br>WT_2 | # PSM<br>TAP_Rtr1_<br>WT_2 | %SC<br>TAP_Rtr1_<br>WT_3 | UP<br>TAP_Rtr1_<br>WT_3 | # PSM<br>TAP_Rtr1_<br>WT_3 | %SC<br>TAP_Rtr1_<br>WT_4 | UP<br>TAP_Rtr1_<br>WT_4 | # PSM<br>TAP_Rtr1_<br>WT_4 | %SC<br>TAP_Rtr1_<br>ctk1_del<br>etion | UP<br>TAP_Rtr1_<br>ctk1_del<br>etion | # PSM<br>TAP_Rtr1_<br>ctk1_del<br>etion |
|-----------|---------|----------------------------|--------------------------|-------------------------|----------------------------|--------------------------|-------------------------|----------------------------|--------------------------|-------------------------|----------------------------|---------------------------------------|--------------------------------------|-----------------------------------------|
| 6320637   | TIF35   | 0                          | 0                        | 0                       | 0                          | 13.50                    | 2                       | 4                          | 0                        | 0                       | 0                          | 0                                     | 0                                    | 0                                       |
| 398364223 | NPR2    | 0                          | 0                        | 0                       | 0                          | 0                        | 0                       | 0                          | 0                        | 0                       | 0                          | 0                                     | 0                                    | 0                                       |
| 6325390   | SPN1    | 1                          | 0                        | 0                       | 0                          | 16.83                    | 5                       | 25                         | 0                        | 0                       | 0                          | 0                                     | 0                                    | 0                                       |
| 6324578   | DNL4    | 0                          | 0                        | 0                       | 0                          | 0                        | 0                       | 0                          | 0                        | 0                       | 0                          | 0                                     | 0                                    | 0                                       |
| 6319291   | FRT2    | 0                          | 0                        | 0                       | 0                          | 0                        | 0                       | 0                          | 0                        | 0                       | 0                          | 0                                     | 0                                    | 0                                       |
| 6322242   | HXT9    | 0                          | 0                        | 0                       | 0                          | 0                        | 0                       | 0                          | 0                        | 0                       | 0                          | 0                                     | 0                                    | 0                                       |
| 6322272   | RPL39   | 0                          | 0                        | 0                       | 0                          | 0                        | 0                       | 0                          | 0                        | 0                       | 0                          | 0                                     | 0                                    | 0                                       |
| 14318518  | VTC2    | 0                          | 0                        | 0                       | 0                          | 1.93                     | 1                       | 1                          | 0                        | 0                       | 0                          | 0                                     | 0                                    | 0                                       |
| 330443752 | THI22   | 0                          | 0                        | 0                       | 0                          | 0                        | 0                       | 0                          | 0                        | 0                       | 0                          | 0                                     | 0                                    | 0                                       |
| 6325175   | MOT1    | 0                          | 0                        | 0                       | 0                          | 1.50                     | 2                       | 3                          | 0                        | 0                       | 0                          | 0                                     | 0                                    | 0                                       |
| 6322796   | DEF1    | 3                          | 0                        | 0                       | 0                          | 0                        | 0                       | 0                          | 0                        | 0                       | 0                          | 4.34                                  | 1                                    | 1                                       |
| 398365059 | PTK2    | 0                          | 0                        | 0                       | 0                          | 0                        | 0                       | 0                          | 0.98                     | 1                       | 1                          | 0                                     | 0                                    | 0                                       |
| 6320345   | DOP1    | 0                          | 0                        | 0                       | 0                          | 1.06                     | 2                       | 3                          | 0                        | 0                       | 0                          | 0                                     | 0                                    | 0                                       |
| 6323863   | HFA1    | 0                          | 0                        | 0                       | 0                          | 1.04                     | 2                       | 7                          | 0                        | 0                       | 0                          | 0                                     | 0                                    | 0                                       |
| 6322948   | MLP1    | 0                          | 0                        | 0                       | 0                          | 0                        | 0                       | 0                          | 0                        | 0                       | 0                          | 0                                     | 0                                    | 0                                       |
| 6322999   | FRA1    | 0                          | 0                        | 0                       | 0                          | 0                        | 0                       | 0                          | 0                        | 0                       | 0                          | 0                                     | 0                                    | 0                                       |
| 6324491   | IRA2    | 0                          | 0                        | 0                       | 0                          | 0                        | 0                       | 0                          | 0                        | 0                       | 0                          | 0                                     | 0                                    | 0                                       |
| 6324215   | RPC19   | 2                          | 0                        | 0                       | 0                          | 8.45                     | 1                       | 1                          | 0                        | 0                       | 0                          | 0                                     | 0                                    | 0                                       |
| 6320419   | UPC2    | 0                          | 0                        | 0                       | 0                          | 1.64                     | 1                       | 1                          | 0                        | 0                       | 0                          | 0                                     | 0                                    | 0                                       |
| 398364627 | RDH54   | 0                          | 0                        | 0                       | 0                          | 2.09                     | 2                       | 2                          | 0                        | 0                       | 0                          | 0                                     | 0                                    | 0                                       |
| 6321752   | VMR1    | 0                          | 0                        | 0                       | 0                          | 0                        | 0                       | 0                          | 0                        | 0                       | 0                          | 0                                     | 0                                    | 0                                       |
| 6321793   | TIM10   | 0                          | 0                        | 0                       | 0                          | 0                        | 0                       | 0                          | 0                        | 0                       | 0                          | 0                                     | 0                                    | 0                                       |
| 6322032   | BNR1    | 0                          | 0                        | 0                       | 0                          | 0                        | 0                       | 0                          | 0                        | 0                       | 0                          | 0                                     | 0                                    | 0                                       |
| 6325074   | RTT10   | 0                          | 0                        | 0                       | 0                          | 0                        | 0                       | 0                          | 0                        | 0                       | 0                          | 0                                     | 0                                    | 0                                       |
| 6325235   | RAD1    | 0                          | 0                        | 0                       | 0                          | 0                        | 0                       | 0                          | 0                        | 0                       | 0                          | 0                                     | 0                                    | 0                                       |
| 6323869   | CEF1    | 0                          | 0                        | 0                       | 0                          | 3.39                     | 1                       | 1                          | 0                        | 0                       | 0                          | 1.53                                  | 1                                    | 1                                       |
| 6323917   | TPS3    | 0                          | 0                        | 0                       | 0                          | 0                        | 0                       | 0                          | 0                        | 0                       | 0                          | 0                                     | 0                                    | 0                                       |
| 6321552   | SPT6    | 0                          | 0                        | 0                       | 0                          | 4.27                     | 5                       | 15                         | 0                        | 0                       | 0                          | 0                                     | 0                                    | 0                                       |
| 6320853   | BIM1    | 0                          | 0                        | 0                       | 0                          | 6.98                     | 2                       | 8                          | 0                        | 0                       | 0                          | 0                                     | 0                                    | 0                                       |
| 398364243 | YEL043W | 0                          | 0                        | 0                       | 0                          | 0                        | 0                       | 0                          | 0                        | 0                       | 0                          | 0                                     | 0                                    | 0                                       |
| 6320027   | DLD1    | 0                          | 0                        | 0                       | 0                          | 0                        | 0                       | 0                          | 0                        | 0                       | 0                          | 0                                     | 0                                    | 0                                       |
| 6323356   | PEX30   | 0                          | 0                        | 0                       | 0                          | 0                        | 0                       | 0                          | 0                        | 0                       | 0                          | 0                                     | 0                                    | 0                                       |
| 6320799   | ANP1    | 0                          | 0                        | 0                       | 0                          | 0                        | 0                       | 0                          | 0                        | 0                       | 0                          | 0                                     | 0                                    | 0                                       |
| 6324393   | YNR065C | 0                          | 0                        | 0                       | 0                          | 0                        | 0                       | 0                          | 0                        | 0                       | 0                          | 0                                     | 0                                    | 0                                       |
| 6323266   | THI7    | 0                          | 2.51                     | 1                       | 1                          | 0                        | 0                       | 0                          | 0                        | 0                       | 0                          | 0                                     | 0                                    | 0                                       |
| 6323445   | YLR413W | 0                          | 0                        | 0                       | 0                          | 0                        | 0                       | 0                          | 0                        | 0                       | 0                          | 0                                     | 0                                    | 0                                       |
| 398364667 | THO2    | 0                          | 0                        | 0                       | 0                          | 0.50                     | 1                       | 1                          | 0                        | 0                       | 0                          | 0                                     | 0                                    | 0                                       |

Table S1 - Smith-Kinnaman, *et al* (2014) Abbreviations: %SC = percent sequence coverage, UP = unique peptides, PSM = peptide spectrum matches

| Accession | Acronym  | # PSM<br>TAP_Rtr1_<br>WT_1 | %SC<br>TAP_Rtr1_<br>WT_2 | UP<br>TAP_Rtr1_<br>WT_2 | # PSM<br>TAP_Rtr1_<br>WT_2 | %SC<br>TAP_Rtr1_<br>WT_3 | UP<br>TAP_Rtr1_<br>WT_3 | # PSM<br>TAP_Rtr1_<br>WT_3 | %SC<br>TAP_Rtr1_<br>WT_4 | UP<br>TAP_Rtr1_<br>WT_4 | # PSM<br>TAP_Rtr1_<br>WT_4 | %SC<br>TAP_Rtr1_<br>ctk1_del<br>etion | UP<br>TAP_Rtr1_<br>ctk1_del<br>etion | # PSM<br>TAP_Rtr1_<br>ctk1_del<br>etion |
|-----------|----------|----------------------------|--------------------------|-------------------------|----------------------------|--------------------------|-------------------------|----------------------------|--------------------------|-------------------------|----------------------------|---------------------------------------|--------------------------------------|-----------------------------------------|
| 37362637  | JIP4     | 0                          | 0                        | 0                       | 0                          | 0                        | 0                       | 0                          | 0                        | 0                       | 0                          | 0                                     | 0                                    | 0                                       |
| 398364707 | AAC3     | 2                          | 0                        | 0                       | 0                          | 3.91                     | 1                       | 1                          | 0                        | 0                       | 0                          | 0                                     | 0                                    | 0                                       |
| 6322570   | YMR1     | 0                          | 0                        | 0                       | 0                          | 3.78                     | 2                       | 2                          | 0                        | 0                       | 0                          | 0                                     | 0                                    | 0                                       |
| 6324879   | ISW2     | 0                          | 0                        | 0                       | 0                          | 5.09                     | 5                       | 14                         | 0.80                     | 1                       | 1                          | 0                                     | 0                                    | 0                                       |
| 10383772  | LEU2     | 1                          | 0                        | 0                       | 0                          | 6.32                     | 1                       | 1                          | 0                        | 0                       | 0                          | 0                                     | 0                                    | 0                                       |
| 6322079   | HOS4     | 0                          | 0                        | 0                       | 0                          | 1.57                     | 1                       | 1                          | 0                        | 0                       | 0                          | 0                                     | 0                                    | 0                                       |
| 6321210   | VID30    | 0                          | 0                        | 0                       | 0                          | 2.40                     | 1                       | 1                          | 0                        | 0                       | 0                          | 0                                     | 0                                    | 0                                       |
| 398365701 | YNR029C  | 0                          | 0                        | 0                       | 0                          | 5.83                     | 2                       | 6                          | 0                        | 0                       | 0                          | 0                                     | 0                                    | 0                                       |
| 6320692   | VPS52    | 0                          | 0                        | 0                       | 0                          | 4.21                     | 2                       | 5                          | 0                        | 0                       | 0                          | 0                                     | 0                                    | 0                                       |
| 398365525 | SMD1     | 0                          | 0                        | 0                       | 0                          | 17.12                    | 2                       | 3                          | 0                        | 0                       | 0                          | 0                                     | 0                                    | 0                                       |
| 6322086   | SLM1     | 2                          | 0                        | 0                       | 0                          | 6.85                     | 3                       | 3                          | 0                        | 0                       | 0                          | 0                                     | 0                                    | 0                                       |
| 398364897 | CBP6     | 5                          | 0                        | 0                       | 0                          | 0                        | 0                       | 0                          | 0                        | 0                       | 0                          | 0                                     | 0                                    | 0                                       |
| 6323726   | NAM7     | 0                          | 0                        | 0                       | 0                          | 0                        | 0                       | 0                          | 0                        | 0                       | 0                          | 0                                     | 0                                    | 0                                       |
| 6324982   | SAM4     | 0                          | 0                        | 0                       | 0                          | 0                        | 0                       | 0                          | 0                        | 0                       | 0                          | 0                                     | 0                                    | 0                                       |
| 6320324   | VBA4     | 0                          | 0                        | 0                       | 0                          | 0                        | 0                       | 0                          | 0                        | 0                       | 0                          | 0                                     | 0                                    | 0                                       |
| 6324612   | HIR2     | 0                          | 0                        | 0                       | 0                          | 0                        | 0                       | 0                          | 0                        | 0                       | 0                          | 0                                     | 0                                    | 0                                       |
| 6324981   | SAM3     | 0                          | 0                        | 0                       | 0                          | 0                        | 0                       | 0                          | 0                        | 0                       | 0                          | 0                                     | 0                                    | 0                                       |
| 6325379   | AXL1     | 0                          | 0                        | 0                       | 0                          | 0                        | 0                       | 0                          | 0                        | 0                       | 0                          | 0                                     | 0                                    | 0                                       |
| 6321020   | BRR2     | 0                          | 0                        | 0                       | 0                          | 0                        | 0                       | 0                          | 0                        | 0                       | 0                          | 0                                     | 0                                    | 0                                       |
| 6324694   | GCY1     | 0                          | 0                        | 0                       | 0                          | 0                        | 0                       | 0                          | 0                        | 0                       | 0                          | 0                                     | 0                                    | 0                                       |
| 6322312   | DAS1     | 0                          | 0                        | 0                       | 0                          | 0                        | 0                       | 0                          | 0                        | 0                       | 0                          | 0                                     | 0                                    | 0                                       |
| 398364625 | YKL033W- | 0                          | 0                        | 0                       | 0                          | 4.66                     | 1                       | 2                          | 0                        | 0                       | 0                          | 0                                     | 0                                    | 0                                       |
| 6320034   | NRP1     | 0                          | 0                        | 0                       | 0                          | 15.86                    | 5                       | 6                          | 0                        | 0                       | 0                          | 0                                     | 0                                    | 0                                       |
| 6325374   | YPR117W  | 0                          | 0                        | 0                       | 0                          | 0                        | 0                       | 0                          | 0                        | 0                       | 0                          | 0                                     | 0                                    | 0                                       |
| 6324546   | MDM38    | 2                          | 0                        | 0                       | 0                          | 0                        | 0                       | 0                          | 0                        | 0                       | 0                          | 0                                     | 0                                    | 0                                       |
| 6323289   | LCB5     | 0                          | 0                        | 0                       | 0                          | 0                        | 0                       | 0                          | 0                        | 0                       | 0                          | 0                                     | 0                                    | 0                                       |
| 6321205   | TAN1     | 0                          | 0                        | 0                       | 0                          | 0                        | 0                       | 0                          | 0                        | 0                       | 0                          | 0                                     | 0                                    | 0                                       |
| 6319351   | PHO11    | 0                          | 0                        | 0                       | 0                          | 0                        | 0                       | 0                          | 0                        | 0                       | 0                          | 0                                     | 0                                    | 0                                       |
| 6319523   | REB1     | 0                          | 0                        | 0                       | 0                          | 0                        | 0                       | 0                          | 0                        | 0                       | 0                          | 0                                     | 0                                    | 0                                       |
| 6320921   | YER077C  | 0                          | 0                        | 0                       | 0                          | 0                        | 0                       | 0                          | 2.76                     | 1                       | 1                          | 0                                     | 0                                    | 0                                       |
| 6320826   | GLC3     | 0                          | 0                        | 0                       | 0                          | 0                        | 0                       | 0                          | 3.41                     | 1                       | 1                          | 0                                     | 0                                    | 0                                       |
| 398365141 | INP53    | 0                          | 0                        | 0                       | 0                          | 1.26                     | 1                       | 3                          | 0                        | 0                       | 0                          | 0                                     | 0                                    | 0                                       |
| 398366583 | SIP1     | 0                          | 0                        | 0                       | 0                          | 1.84                     | 1                       | 1                          | 0                        | 0                       | 0                          | 0                                     | 0                                    | 0                                       |
| 398364669 | MAD3     | 0                          | 0                        | 0                       | 0                          | 3.88                     | 1                       | 2                          | 0                        | 0                       | 0                          | 0                                     | 0                                    | 0                                       |
| 6322700   | DBR1     | 0                          | 0                        | 0                       | 0                          | 2.72                     | 1                       | 1                          | 0                        | 0                       | 0                          | 0                                     | 0                                    | 0                                       |
| 6323317   | YLR287C  | 0                          | 0                        | 0                       | 0                          | 3.66                     | 1                       | 1                          | 0                        | 0                       | 0                          | 0                                     | 0                                    | 0                                       |
| 398365819 | SAN1     | 0                          | 0                        | 0                       | 0                          | 3.28                     | 1                       | 1                          | 0                        | 0                       | 0                          | 0                                     | 0                                    | 0                                       |



Table S1 - Smith-Kinnaman, *et al* (2014) Abbreviations: %SC = percent sequence coverage, UP = unique peptides, PSM = peptide spectrum matches

| Accession | Acronym  | # PSM<br>TAP_Rtr1_<br>WT_1 | %SC<br>TAP_Rtr1_<br>WT_2 | UP<br>TAP_Rtr1_<br>WT_2 | # PSM<br>TAP_Rtr1_<br>WT_2 | %SC<br>TAP_Rtr1_<br>WT_3 | UP<br>TAP_Rtr1_<br>WT_3 | # PSM<br>TAP_Rtr1_<br>WT_3 | %SC<br>TAP_Rtr1_<br>WT_4 | UP<br>TAP_Rtr1_<br>WT_4 | # PSM<br>TAP_Rtr1_<br>WT_4 | %SC<br>TAP_Rtr1_<br>ctk1_del<br>etion | UP<br>TAP_Rtr1_<br>ctk1_del<br>etion | # PSM<br>TAP_Rtr1_<br>ctk1_del<br>etion |
|-----------|----------|----------------------------|--------------------------|-------------------------|----------------------------|--------------------------|-------------------------|----------------------------|--------------------------|-------------------------|----------------------------|---------------------------------------|--------------------------------------|-----------------------------------------|
| 398365335 | YNL033W  | 0                          | 0                        | 0                       | 0                          | 0                        | 0                       | 0                          | 0                        | 0                       | 0                          | 0                                     | 0                                    | 0                                       |
| 33438893  | YPL119C- | 0                          | 0                        | 0                       | 0                          | 0                        | 0                       | 0                          | 0                        | 0                       | 0                          | 0                                     | 0                                    | 0                                       |
| 6322579   | JHD2     | 0                          | 0                        | 0                       | 0                          | 0                        | 0                       | 0                          | 0                        | 0                       | 0                          | 0                                     | 0                                    | 0                                       |
| 6324141   | KAR1     | 0                          | 0                        | 0                       | 0                          | 0                        | 0                       | 0                          | 0                        | 0                       | 0                          | 0                                     | 0                                    | 0                                       |
| 10383756  | LRE1     | 0                          | 0                        | 0                       | 0                          | 0                        | 0                       | 0                          | 0                        | 0                       | 0                          | 0                                     | 0                                    | 0                                       |
| 398364917 | NHP10    | 0                          | 0                        | 0                       | 0                          | 0                        | 0                       | 0                          | 0                        | 0                       | 0                          | 0                                     | 0                                    | 0                                       |
| 6323035   | NSE1     | 0                          | 0                        | 0                       | 0                          | 0                        | 0                       | 0                          | 0                        | 0                       | 0                          | 0                                     | 0                                    | 0                                       |
| 50593425  | OMA1     | 0                          | 0                        | 0                       | 0                          | 0                        | 0                       | 0                          | 0                        | 0                       | 0                          | 0                                     | 0                                    | 0                                       |
| 6321910   | ORC6     | 0                          | 0                        | 0                       | 0                          | 0                        | 0                       | 0                          | 0                        | 0                       | 0                          | 0                                     | 0                                    | 0                                       |
| 6322494   | PET191   | 0                          | 0                        | 0                       | 0                          | 0                        | 0                       | 0                          | 0                        | 0                       | 0                          | 0                                     | 0                                    | 0                                       |
| 398365057 | SPO14    | 0                          | 0                        | 0                       | 0                          | 0                        | 0                       | 0                          | 0                        | 0                       | 0                          | 0                                     | 0                                    | 0                                       |
| 398364971 | TRP1     | 0                          | 0                        | 0                       | 0                          | 0                        | 0                       | 0                          | 0                        | 0                       | 0                          | 0                                     | 0                                    | 0                                       |
| 398365003 | PSF1     | 0                          | 0                        | 0                       | 0                          | 0                        | 0                       | 0                          | 0                        | 0                       | 0                          | 0                                     | 0                                    | 0                                       |
| 6321697   | RAD2     | 0                          | 0                        | 0                       | 0                          | 0                        | 0                       | 0                          | 0                        | 0                       | 0                          | 0                                     | 0                                    | 0                                       |
| 6319525   | REG2     | 0                          | 0                        | 0                       | 0                          | 0                        | 0                       | 0                          | 0                        | 0                       | 0                          | 0                                     | 0                                    | 0                                       |
| 6320271   | RTR2     | 0                          | 0                        | 0                       | 0                          | 0                        | 0                       | 0                          | 0                        | 0                       | 0                          | 0                                     | 0                                    | 0                                       |
| 6324162   | SKO1     | 0                          | 0                        | 0                       | 0                          | 0                        | 0                       | 0                          | 0                        | 0                       | 0                          | 0                                     | 0                                    | 0                                       |
| 398366633 | SNM1     | 0                          | 0                        | 0                       | 0                          | 0                        | 0                       | 0                          | 0                        | 0                       | 0                          | 0                                     | 0                                    | 0                                       |
| 6322778   | STB6     | 0                          | 0                        | 0                       | 0                          | 0                        | 0                       | 0                          | 0                        | 0                       | 0                          | 0                                     | 0                                    | 0                                       |
| 6325081   | TRE1     | 0                          | 0                        | 0                       | 0                          | 0                        | 0                       | 0                          | 0                        | 0                       | 0                          | 0                                     | 0                                    | 0                                       |
| 6324447   | TRM13    | 0                          | 0                        | 0                       | 0                          | 0                        | 0                       | 0                          | 0                        | 0                       | 0                          | 0                                     | 0                                    | 0                                       |
| 6323236   | HRD3     | 0                          | 0                        | 0                       | 0                          | 0                        | 0                       | 0                          | 0                        | 0                       | 0                          | 0                                     | 0                                    | 0                                       |
| 6325184   | UBP16    | 0                          | 0                        | 0                       | 0                          | 0                        | 0                       | 0                          | 0                        | 0                       | 0                          | 0                                     | 0                                    | 0                                       |
| 398364885 | UBP5     | 0                          | 0                        | 0                       | 0                          | 0                        | 0                       | 0                          | 0                        | 0                       | 0                          | 0                                     | 0                                    | 0                                       |
| 6325071   | UIP4     | 0                          | 0                        | 0                       | 0                          | 0                        | 0                       | 0                          | 0                        | 0                       | 0                          | 0                                     | 0                                    | 0                                       |
| 398365127 | UIP5     | 0                          | 0                        | 0                       | 0                          | 0                        | 0                       | 0                          | 0                        | 0                       | 0                          | 0                                     | 0                                    | 0                                       |
| 6319904   | YIH1     | 0                          | 0                        | 0                       | 0                          | 0                        | 0                       | 0                          | 0                        | 0                       | 0                          | 0                                     | 0                                    | 0                                       |
| 6325266   | SUT2     | 0                          | 0                        | 0                       | 0                          | 0                        | 0                       | 0                          | 0                        | 0                       | 0                          | 0                                     | 0                                    | 0                                       |
| 6324449   | HRP1     | 2                          | 4.31                     | 1                       | 1                          | 0                        | 0                       | 0                          | 0                        | 0                       | 0                          | 0                                     | 0                                    | 0                                       |
| 6323278   | YEF3     | 20                         | 3.07                     | 2                       | 3                          | 16.00                    | 11                      | 30                         | 5.36                     | 5                       | 30                         | 0.77                                  | 1                                    | 1                                       |
| 6322084   | PFK26    | 0                          | 0                        | 0                       | 0                          | 0                        | 0                       | 0                          | 0                        | 0                       | 0                          | 0                                     | 0                                    | 0                                       |
| 6323057   | RPL15A   | 2                          | 0                        | 0                       | 0                          | 13.73                    | 2                       | 4                          | 0                        | 0                       | 0                          | 0                                     | 0                                    | 0                                       |
| 6323769   | RPL15B   | 2                          | 0                        | 0                       | 0                          | 13.73                    | 2                       | 4                          | 0                        | 0                       | 0                          | 0                                     | 0                                    | 0                                       |
| 6319282   | FUN12    | 0                          | 0                        | 0                       | 0                          | 30.04                    | 18                      | 110                        | 5.79                     | 6                       | 8                          | 0                                     | 0                                    | 0                                       |
| 6320190   | NOP1     | 10                         | 0                        | 0                       | 0                          | 37.92                    | 10                      | 33                         | 18.96                    | 6                       | 20                         | 0                                     | 0                                    | 0                                       |
| 6323654   | CLU1     | 0                          | 0                        | 0                       | 0                          | 22.87                    | 21                      | 89                         | 9.55                     | 12                      | 19                         | 0                                     | 0                                    | 0                                       |
| 6324886   | NOP58    | 0                          | 6.85                     | 2                       | 2                          | 34.44                    | 11                      | 70                         | 10.18                    | 4                       | 4                          | 0                                     | 0                                    | 0                                       |



Table S1 - Smith-Kinnaman, *et al* (2014) Abbreviations: %SC = percent sequence coverage, UP = unique peptides, PSM = peptide spectrum matches

| Accession | Acronym | # PSM<br>TAP_Rtr1_<br>WT_1 | %SC<br>TAP_Rtr1_<br>WT_2 | UP<br>TAP_Rtr1_<br>WT_2 | # PSM<br>TAP_Rtr1_<br>WT_2 | %SC<br>TAP_Rtr1_<br>WT_3 | UP<br>TAP_Rtr1_<br>WT_3 | # PSM<br>TAP_Rtr1_<br>WT_3 | %SC<br>TAP_Rtr1_<br>WT_4 | UP<br>TAP_Rtr1_<br>WT_4 | # PSM<br>TAP_Rtr1_<br>WT_4 | %SC<br>TAP_Rtr1_<br>ctk1_del<br>etion | UP<br>TAP_Rtr1_<br>ctk1_del<br>etion | # PSM<br>TAP_Rtr1_<br>ctk1_del<br>etion |
|-----------|---------|----------------------------|--------------------------|-------------------------|----------------------------|--------------------------|-------------------------|----------------------------|--------------------------|-------------------------|----------------------------|---------------------------------------|--------------------------------------|-----------------------------------------|
| 6321807   | DED81   | 6                          | 0                        | 0                       | 0                          | 6.86                     | 3                       | 5                          | 1.99                     | 1                       | 1                          | 9.39                                  | 4                                    | 48                                      |
| 398364767 | SUI2    | 0                          | 0                        | 0                       | 0                          | 16.78                    | 3                       | 9                          | 3.62                     | 1                       | 2                          | 0                                     | 0                                    | 0                                       |
| 6323011   | DPS1    | 4                          | 0                        | 0                       | 0                          | 6.82                     | 3                       | 3                          | 7.18                     | 4                       | 5                          | 5.75                                  | 2                                    | 21                                      |
| 6323885   | RRP5    | 1                          | 0                        | 0                       | 0                          | 9.66                     | 11                      | 30                         | 1.27                     | 2                       | 2                          | 0                                     | 0                                    | 0                                       |
| 398366547 | RPP2B   | 16                         | 0                        | 0                       | 0                          | 53.64                    | 4                       | 8                          | 10.00                    | 1                       | 1                          | 0                                     | 0                                    | 0                                       |
| 6323288   | HSP60   | 50                         | 2.80                     | 1                       | 1                          | 37.76                    | 18                      | 112                        | 0                        | 0                       | 0                          | 0                                     | 0                                    | 0                                       |
| 6321599   | NSR1    | 0                          | 0                        | 0                       | 0                          | 16.91                    | 5                       | 11                         | 9.90                     | 4                       | 4                          | 0                                     | 0                                    | 0                                       |
| 6320863   | GCD11   | 0                          | 0                        | 0                       | 0                          | 26.76                    | 10                      | 38                         | 10.06                    | 5                       | 10                         | 3.04                                  | 1                                    | 2                                       |
| 398366591 | NPL3    | 19                         | 19.32                    | 4                       | 14                         | 11.84                    | 3                       | 13                         | 11.84                    | 3                       | 53                         | 3.38                                  | 1                                    | 1                                       |
| 6319483   | IPP1    | 0                          | 0                        | 0                       | 0                          | 0                        | 0                       | 0                          | 0                        | 0                       | 0                          | 0                                     | 0                                    | 0                                       |
| 6325221   | PMA2    | 1                          | 0                        | 0                       | 0                          | 6.65                     | 4                       | 9                          | 0                        | 0                       | 0                          | 0                                     | 0                                    | 0                                       |
| 6322745   | GFA1    | 3                          | 0                        | 0                       | 0                          | 30.82                    | 14                      | 92                         | 0                        | 0                       | 0                          | 0                                     | 0                                    | 0                                       |
| 398364525 | LSG1    | 0                          | 0                        | 0                       | 0                          | 0                        | 0                       | 0                          | 1.72                     | 1                       | 4                          | 0                                     | 0                                    | 0                                       |
| 6325038   | SAR1    | 0                          | 15.79                    | 2                       | 3                          | 86.32                    | 13                      | 152                        | 0                        | 0                       | 0                          | 0                                     | 0                                    | 0                                       |
| 6323840   | HSC82   | 44                         | 7.94                     | 3                       | 3                          | 37.45                    | 24                      | 300                        | 4.96                     | 3                       | 3                          | 1.99                                  | 1                                    | 1                                       |
| 6321881   | GAR1    | 0                          | 0                        | 0                       | 0                          | 32.68                    | 4                       | 22                         | 0                        | 0                       | 0                          | 0                                     | 0                                    | 0                                       |
| 6320164   | NAT1    | 0                          | 0                        | 0                       | 0                          | 0                        | 0                       | 0                          | 3.63                     | 3                       | 5                          | 0                                     | 0                                    | 0                                       |
| 398366403 | RPS12   | 1                          | 0                        | 0                       | 0                          | 39.86                    | 4                       | 7                          | 0                        | 0                       | 0                          | 0                                     | 0                                    | 0                                       |
| 6322830   | CDC16   | 0                          | 0                        | 0                       | 0                          | 0                        | 0                       | 0                          | 0                        | 0                       | 0                          | 0                                     | 0                                    | 0                                       |
| 330443397 | ATP1    | 14                         | 0                        | 0                       | 0                          | 42.57                    | 17                      | 114                        | 0                        | 0                       | 0                          | 0                                     | 0                                    | 0                                       |
| 6324709   | IDH2    | 3                          | 0                        | 0                       | 0                          | 44.17                    | 9                       | 76                         | 0                        | 0                       | 0                          | 0                                     | 0                                    | 0                                       |
| 6325178   | RPL21B  | 4                          | 0                        | 0                       | 0                          | 5.63                     | 1                       | 1                          | 0                        | 0                       | 0                          | 0                                     | 0                                    | 0                                       |
| 6321903   | UBA4    | 0                          | 0                        | 0                       | 0                          | 4.09                     | 2                       | 3                          | 0                        | 0                       | 0                          | 0                                     | 0                                    | 0                                       |
| 6325138   | DBP1    | 12                         | 1.78                     | 1                       | 1                          | 6.16                     | 3                       | 7                          | 3.24                     | 2                       | 10                         | 0                                     | 0                                    | 0                                       |
| 6325248   | TAE2    | 0                          | 0                        | 0                       | 0                          | 4.14                     | 3                       | 8                          | 0                        | 0                       | 0                          | 0                                     | 0                                    | 0                                       |
| 330443505 | DBP10   | 0                          | 0                        | 0                       | 0                          | 8.64                     | 6                       | 7                          | 0                        | 0                       | 0                          | 0                                     | 0                                    | 0                                       |
| 6320148   | PSA1    | 4                          | 4.99                     | 1                       | 2                          | 62.88                    | 15                      | 983                        | 0                        | 0                       | 0                          | 0                                     | 0                                    | 0                                       |
| 6325016   | HSP82   | 40                         | 4.09                     | 2                       | 2                          | 36.39                    | 22                      | 248                        | 4.94                     | 3                       | 3                          | 1.97                                  | 1                                    | 1                                       |
| 6320874   | ARB1    | 0                          | 0                        | 0                       | 0                          | 26.39                    | 11                      | 49                         | 6.07                     | 3                       | 3                          | 0                                     | 0                                    | 0                                       |
| 6319673   | PGI1    | 2                          | 0                        | 0                       | 0                          | 8.12                     | 3                       | 12                         | 0                        | 0                       | 0                          | 0                                     | 0                                    | 0                                       |
| 398365251 | GSC2    | 0                          | 0                        | 0                       | 0                          | 0                        | 0                       | 0                          | 0.53                     | 1                       | 1                          | 0                                     | 0                                    | 0                                       |
| 6325018   | SUI3    | 3                          | 0                        | 0                       | 0                          | 18.25                    | 4                       | 14                         | 9.47                     | 3                       | 5                          | 0                                     | 0                                    | 0                                       |
| 6323374   | FKS1    | 0                          | 0                        | 0                       | 0                          | 0                        | 0                       | 0                          | 0.53                     | 1                       | 1                          | 0                                     | 0                                    | 0                                       |
| 14318479  | ACT1    | 19                         | 7.73                     | 2                       | 4                          | 24.80                    | 5                       | 27                         | 2.67                     | 1                       | 1                          | 0                                     | 0                                    | 0                                       |
| 6323554   | TUB1    | 4                          | 0                        | 0                       | 0                          | 25.73                    | 8                       | 66                         | 0                        | 0                       | 0                          | 0                                     | 0                                    | 0                                       |
| 6321724   | ZUO1    | 2                          | 0                        | 0                       | 0                          | 3.70                     | 1                       | 1                          | 2.77                     | 1                       | 1                          | 2.31                                  | 1                                    | 1                                       |
| 6320842   | NUG1    | 0                          | 0                        | 0                       | 0                          | 27.31                    | 10                      | 32                         | 0                        | 0                       | 0                          | 0                                     | 0                                    | 0                                       |

Table S1 - Smith-Kinnaman, *et al* (2014) Abbreviations: %SC = percent sequence coverage, UP = unique peptides, PSM = peptide spectrum matches

| Accession | Acronym | # PSM<br>TAP_Rtr1_<br>WT_1 | %SC<br>TAP_Rtr1_<br>WT_2 | UP<br>TAP_Rtr1_<br>WT_2 | # PSM<br>TAP_Rtr1_<br>WT_2 | %SC<br>TAP_Rtr1_<br>WT_3 | UP<br>TAP_Rtr1_<br>WT_3 | # PSM<br>TAP_Rtr1_<br>WT_3 | %SC<br>TAP_Rtr1_<br>WT_4 | UP<br>TAP_Rtr1_<br>WT_4 | # PSM<br>TAP_Rtr1_<br>WT_4 | %SC<br>TAP_Rtr1_<br>ctk1_del<br>etion | UP<br>TAP_Rtr1_<br>ctk1_del<br>etion | # PSM<br>TAP_Rtr1_<br>ctk1_del<br>etion |
|-----------|---------|----------------------------|--------------------------|-------------------------|----------------------------|--------------------------|-------------------------|----------------------------|--------------------------|-------------------------|----------------------------|---------------------------------------|--------------------------------------|-----------------------------------------|
| 6322652   | YKT6    | 2                          | 0                        | 0                       | 0                          | 56.00                    | 9                       | 79                         | 0                        | 0                       | 0                          | 0                                     | 0                                    | 0                                       |
| 6321706   | FOL2    | 0                          | 0                        | 0                       | 0                          | 3.70                     | 1                       | 1                          | 0                        | 0                       | 0                          | 0                                     | 0                                    | 0                                       |
| 6319546   | HSP26   | 13                         | 0                        | 0                       | 0                          | 30.84                    | 5                       | 11                         | 5.14                     | 2                       | 3                          | 22.43                                 | 3                                    | 112                                     |
| 398364355 | RPL29   | 2                          | 32.20                    | 2                       | 2                          | 13.56                    | 1                       | 1                          | 0                        | 0                       | 0                          | 0                                     | 0                                    | 0                                       |
| 398365973 | TIF4631 | 6                          | 0                        | 0                       | 0                          | 18.91                    | 10                      | 35                         | 1.16                     | 1                       | 1                          | 0                                     | 0                                    | 0                                       |
| 6321929   | ARO9    | 0                          | 0                        | 0                       | 0                          | 6.63                     | 2                       | 4                          | 0                        | 0                       | 0                          | 0                                     | 0                                    | 0                                       |
| 6321808   | YHR020W | 8                          | 2.76                     | 1                       | 1                          | 41.13                    | 18                      | 64                         | 2.33                     | 1                       | 2                          | 0                                     | 0                                    | 0                                       |
| 6323729   | ADH3    | 0                          | 0                        | 0                       | 0                          | 0                        | 0                       | 0                          | 0                        | 0                       | 0                          | 0                                     | 0                                    | 0                                       |
| 6319395   | ILS1    | 2                          | 0                        | 0                       | 0                          | 4.20                     | 3                       | 3                          | 0                        | 0                       | 0                          | 1.59                                  | 1                                    | 1                                       |
| 6323969   | NIP1    | 4                          | 0                        | 0                       | 0                          | 5.30                     | 3                       | 6                          | 1.23                     | 1                       | 1                          | 0                                     | 0                                    | 0                                       |
| 6322666   | FAS1    | 8                          | 0.93                     | 1                       | 1                          | 12.14                    | 16                      | 48                         | 0                        | 0                       | 0                          | 0                                     | 0                                    | 0                                       |
| 6323568   | TCB3    | 0                          | 0                        | 0                       | 0                          | 1.04                     | 1                       | 1                          | 0                        | 0                       | 0                          | 0                                     | 0                                    | 0                                       |
| 398366505 | HXT7    | 0                          | 0                        | 0                       | 0                          | 0                        | 0                       | 0                          | 0                        | 0                       | 0                          | 0                                     | 0                                    | 0                                       |
| 6322289   | CPS1    | 0                          | 0                        | 0                       | 0                          | 5.21                     | 3                       | 4                          | 0                        | 0                       | 0                          | 0                                     | 0                                    | 0                                       |
| 398366285 | ALA1    | 4                          | 0                        | 0                       | 0                          | 10.86                    | 8                       | 19                         | 0                        | 0                       | 0                          | 0                                     | 0                                    | 0                                       |
| 6319553   | RPG1    | 15                         | 0                        | 0                       | 0                          | 7.78                     | 5                       | 9                          | 1.24                     | 1                       | 1                          | 0                                     | 0                                    | 0                                       |
| 6325298   | TIF5    | 0                          | 0                        | 0                       | 0                          | 3.21                     | 1                       | 2                          | 2.72                     | 1                       | 1                          | 0                                     | 0                                    | 0                                       |
| 398366229 | FAA1    | 0                          | 0                        | 0                       | 0                          | 0                        | 0                       | 0                          | 0                        | 0                       | 0                          | 0                                     | 0                                    | 0                                       |
| 6323613   | TSA1    | 11                         | 0                        | 0                       | 0                          | 33.16                    | 6                       | 23                         | 4.08                     | 1                       | 1                          | 0                                     | 0                                    | 0                                       |
| 6323183   | RNH203  | 0                          | 0                        | 0                       | 0                          | 0                        | 0                       | 0                          | 0                        | 0                       | 0                          | 0                                     | 0                                    | 0                                       |
| 6320359   | CPR1    | 0                          | 0                        | 0                       | 0                          | 20.99                    | 2                       | 5                          | 0                        | 0                       | 0                          | 0                                     | 0                                    | 0                                       |
| 6321236   | ARO8    | 0                          | 0                        | 0                       | 0                          | 8.80                     | 3                       | 9                          | 0                        | 0                       | 0                          | 0                                     | 0                                    | 0                                       |
| 6323861   | PFK2    | 42                         | 2.50                     | 1                       | 1                          | 16.58                    | 9                       | 42                         | 0                        | 0                       | 0                          | 5.94                                  | 4                                    | 11                                      |
| 398365253 | TIF1    | 21                         | 4.05                     | 1                       | 1                          | 52.66                    | 15                      | 215                        | 5.32                     | 2                       | 2                          | 0                                     | 0                                    | 0                                       |
| 6323511   | TUB3    | 3                          | 0                        | 0                       | 0                          | 18.20                    | 5                       | 54                         | 0                        | 0                       | 0                          | 0                                     | 0                                    | 0                                       |
| 37362625  | SRO9    | 10                         | 25.58                    | 5                       | 11                         | 28.34                    | 7                       | 57                         | 0                        | 0                       | 0                          | 0                                     | 0                                    | 0                                       |
| 398365115 | BMH1    | 9                          | 0                        | 0                       | 0                          | 38.95                    | 8                       | 37                         | 0                        | 0                       | 0                          | 0                                     | 0                                    | 0                                       |
| 398366063 | TYS1    | 0                          | 0                        | 0                       | 0                          | 0                        | 0                       | 0                          | 2.03                     | 1                       | 2                          | 0                                     | 0                                    | 0                                       |
| 6323002   | HSP104  | 2                          | 0                        | 0                       | 0                          | 14.98                    | 10                      | 24                         | 3.85                     | 3                       | 3                          | 0                                     | 0                                    | 0                                       |
| 6324902   | MYO2    | 0                          | 0                        | 0                       | 0                          | 15.76                    | 17                      | 50                         | 0                        | 0                       | 0                          | 0                                     | 0                                    | 0                                       |
| 6323947   | HAS1    | 0                          | 0                        | 0                       | 0                          | 12.08                    | 5                       | 11                         | 4.36                     | 2                       | 2                          | 0                                     | 0                                    | 0                                       |
| 6320376   | HSP42   | 0                          | 0                        | 0                       | 0                          | 2.93                     | 1                       | 1                          | 0                        | 0                       | 0                          | 0                                     | 0                                    | 0                                       |
| 398364255 | HYP2    | 0                          | 0                        | 0                       | 0                          | 11.46                    | 1                       | 1                          | 0                        | 0                       | 0                          | 0                                     | 0                                    | 0                                       |
| 6320809   | SNU13   | 0                          | 19.05                    | 1                       | 2                          | 36.51                    | 2                       | 13                         | 0                        | 0                       | 0                          | 0                                     | 0                                    | 0                                       |
| 6323021   | DRS1    | 0                          | 0                        | 0                       | 0                          | 16.49                    | 8                       | 11                         | 0                        | 0                       | 0                          | 0                                     | 0                                    | 0                                       |
| 398366329 | PYK2    | 4                          | 0                        | 0                       | 0                          | 1.98                     | 1                       | 17                         | 1.98                     | 1                       | 1                          | 1.98                                  | 1                                    | 22                                      |
| 398365741 | NOC2    | 0                          | 0                        | 0                       | 0                          | 7.46                     | 4                       | 9                          | 0                        | 0                       | 0                          | 0                                     | 0                                    | 0                                       |

Table S1 - Smith-Kinnaman, *et al* (2014) Abbreviations: %SC = percent sequence coverage, UP = unique peptides, PSM = peptide spectrum matches

| Accession | Acronym | # PSM<br>TAP_Rtr1_<br>WT_1 | %SC<br>TAP_Rtr1_<br>WT_2 | UP<br>TAP_Rtr1_<br>WT_2 | # PSM<br>TAP_Rtr1_<br>WT_2 | %SC<br>TAP_Rtr1_<br>WT_3 | UP<br>TAP_Rtr1_<br>WT_3 | # PSM<br>TAP_Rtr1_<br>WT_3 | %SC<br>TAP_Rtr1_<br>WT_4 | UP<br>TAP_Rtr1_<br>WT_4 | # PSM<br>TAP_Rtr1_<br>WT_4 | %SC<br>TAP_Rtr1_<br>ctk1_del<br>etion | UP<br>TAP_Rtr1_<br>ctk1_del<br>etion | # PSM<br>TAP_Rtr1_<br>ctk1_del<br>etion |
|-----------|---------|----------------------------|--------------------------|-------------------------|----------------------------|--------------------------|-------------------------|----------------------------|--------------------------|-------------------------|----------------------------|---------------------------------------|--------------------------------------|-----------------------------------------|
| 6321027   | DMC1    | 0                          | 0                        | 0                       | 0                          | 0                        | 0                       | 0                          | 0                        | 0                       | 0                          | 0                                     | 0                                    | 0                                       |
| 398364483 | HOR2    | 27                         | 0                        | 0                       | 0                          | 19.20                    | 4                       | 8                          | 0                        | 0                       | 0                          | 0                                     | 0                                    | 0                                       |
| 398365429 | PDR5    | 1                          | 0                        | 0                       | 0                          | 3.64                     | 3                       | 4                          | 0                        | 0                       | 0                          | 0                                     | 0                                    | 0                                       |
| 6325245   | RRP12   | 0                          | 0                        | 0                       | 0                          | 6.03                     | 6                       | 22                         | 0                        | 0                       | 0                          | 0                                     | 0                                    | 0                                       |
| 398364937 | TOP2    | 0                          | 0                        | 0                       | 0                          | 0.91                     | 1                       | 1                          | 0.77                     | 1                       | 1                          | 1                                     | 0                                    | 0                                       |
| 6324660   | TCB1    | 0                          | 0                        | 0                       | 0                          | 0                        | 0                       | 0                          | 0                        | 0                       | 0                          | 0                                     | 0                                    | 0                                       |
| 6320056   | COP1    | 0                          | 0                        | 0                       | 0                          | 23.23                    | 18                      | 55                         | 0.67                     | 1                       | 1                          | 0                                     | 0                                    | 0                                       |
| 398365597 | BMH2    | 9                          | 0                        | 0                       | 0                          | 29.30                    | 6                       | 32                         | 0                        | 0                       | 0                          | 0                                     | 0                                    | 0                                       |
| 6325030   | NEW1    | 1                          | 0                        | 0                       | 0                          | 6.19                     | 5                       | 10                         | 0                        | 0                       | 0                          | 0                                     | 0                                    | 0                                       |
| 6321809   | RPS27B  | 0                          | 0                        | 0                       | 0                          | 0                        | 0                       | 0                          | 0                        | 0                       | 0                          | 0                                     | 0                                    | 0                                       |
| 6321012   | CHD1    | 0                          | 0                        | 0                       | 0                          | 8.45                     | 9                       | 24                         | 0.68                     | 1                       | 1                          | 0                                     | 0                                    | 0                                       |
| 6320499   | SSD1    | 0                          | 0                        | 0                       | 0                          | 1.60                     | 1                       | 1                          | 1.28                     | 2                       | 3                          | 0                                     | 0                                    | 0                                       |
| 6323072   | TRX1    | 0                          | 0                        | 0                       | 0                          | 41.75                    | 4                       | 11                         | 0                        | 0                       | 0                          | 0                                     | 0                                    | 0                                       |
| 6325238   | VTC3    | 1                          | 0                        | 0                       | 0                          | 0                        | 0                       | 0                          | 0                        | 0                       | 0                          | 0                                     | 0                                    | 0                                       |
| 398365319 | MAK21   | 0                          | 0                        | 0                       | 0                          | 7.41                     | 6                       | 10                         | 0                        | 0                       | 0                          | 0                                     | 0                                    | 0                                       |
| 398364327 | LSB3    | 0                          | 0                        | 0                       | 0                          | 40.09                    | 11                      | 86                         | 1.74                     | 1                       | 1                          | 3.92                                  | 1                                    | 14                                      |
| 6319513   | ATP3    | 30                         | 0                        | 0                       | 0                          | 33.12                    | 7                       | 36                         | 13.50                    | 4                       | 4                          | 0                                     | 0                                    | 0                                       |
| 6324140   | SRP1    | 0                          | 0                        | 0                       | 0                          | 16.42                    | 5                       | 15                         | 0                        | 0                       | 0                          | 0                                     | 0                                    | 0                                       |
| 6324297   | HHT2    | 0                          | 0                        | 0                       | 0                          | 0                        | 0                       | 0                          | 0                        | 0                       | 0                          | 0                                     | 0                                    | 0                                       |
| 6323306   | DBP9    | 0                          | 0                        | 0                       | 0                          | 15.32                    | 7                       | 20                         | 0                        | 0                       | 0                          | 0                                     | 0                                    | 0                                       |
| 6324039   | RFC3    | 0                          | 0                        | 0                       | 0                          | 12.94                    | 3                       | 7                          | 2.65                     | 1                       | 1                          | 0                                     | 0                                    | 0                                       |
| 6321193   | RTF1    | 0                          | 0                        | 0                       | 0                          | 5.73                     | 2                       | 3                          | 0                        | 0                       | 0                          | 0                                     | 0                                    | 0                                       |
| 398366149 | TRX2    | 0                          | 0                        | 0                       | 0                          | 67.31                    | 7                       | 22                         | 0                        | 0                       | 0                          | 0                                     | 0                                    | 0                                       |
| 6322452   | CCT8    | 2                          | 0                        | 0                       | 0                          | 51.23                    | 20                      | 82                         | 0                        | 0                       | 0                          | 0                                     | 0                                    | 0                                       |
| 6321679   | PFK1    | 7                          | 0                        | 0                       | 0                          | 17.02                    | 11                      | 34                         | 0                        | 0                       | 0                          | 5.37                                  | 3                                    | 3                                       |
| 6324219   | NOP15   | 0                          | 0                        | 0                       | 0                          | 5.91                     | 1                       | 4                          | 0                        | 0                       | 0                          | 0                                     | 0                                    | 0                                       |
| 330443717 | CTR9    | 0                          | 0                        | 0                       | 0                          | 4.36                     | 3                       | 4                          | 2.32                     | 1                       | 1                          | 0                                     | 0                                    | 0                                       |
| 6323755   | ILV2    | 4                          | 3.06                     | 1                       | 1                          | 31.00                    | 13                      | 140                        | 6.55                     | 2                       | 2                          | 0                                     | 0                                    | 0                                       |
| 6320276   | PAA1    | 0                          | 0                        | 0                       | 0                          | 18.85                    | 3                       | 12                         | 0                        | 0                       | 0                          | 0                                     | 0                                    | 0                                       |
| 6681849   | RPL42A  | 0                          | 0                        | 0                       | 0                          | 0                        | 0                       | 0                          | 0                        | 0                       | 0                          | 0                                     | 0                                    | 0                                       |
| 14318517  | SEC4    | 0                          | 0                        | 0                       | 0                          | 13.02                    | 2                       | 9                          | 0                        | 0                       | 0                          | 0                                     | 0                                    | 0                                       |
| 6320400   | MSS116  | 0                          | 0                        | 0                       | 0                          | 0                        | 0                       | 0                          | 0                        | 0                       | 0                          | 0                                     | 0                                    | 0                                       |
| 6321389   | TIF4632 | 4                          | 0                        | 0                       | 0                          | 2.08                     | 2                       | 8                          | 0                        | 0                       | 0                          | 0                                     | 0                                    | 0                                       |
| 6324081   | RPA49   | 0                          | 0                        | 0                       | 0                          | 28.67                    | 7                       | 22                         | 0                        | 0                       | 0                          | 0                                     | 0                                    | 0                                       |
| 398366347 | MES1    | 0                          | 0                        | 0                       | 0                          | 19.17                    | 10                      | 25                         | 0                        | 0                       | 0                          | 0                                     | 0                                    | 0                                       |
| 6320418   | TCP1    | 6                          | 0                        | 0                       | 0                          | 49.19                    | 18                      | 126                        | 0                        | 0                       | 0                          | 0                                     | 0                                    | 0                                       |
| 398365595 | PIL1    | 16                         | 5.31                     | 1                       | 2                          | 20.94                    | 5                       | 16                         | 2.95                     | 1                       | 1                          | 0                                     | 0                                    | 0                                       |



Table S1 - Smith-Kinnaman, *et al* (2014) Abbreviations: %SC = percent sequence coverage, UP = unique peptides, PSM = peptide spectrum matches

| Accession | Acronym | # PSM<br>TAP_Rtr1_<br>WT_1 | %SC<br>TAP_Rtr1_<br>WT_2 | UP<br>TAP_Rtr1_<br>WT_2 | # PSM<br>TAP_Rtr1_<br>WT_2 | %SC<br>TAP_Rtr1_<br>WT_3 | UP<br>TAP_Rtr1_<br>WT_3 | # PSM<br>TAP_Rtr1_<br>WT_3 | %SC<br>TAP_Rtr1_<br>WT_4 | UP<br>TAP_Rtr1_<br>WT_4 | # PSM<br>TAP_Rtr1_<br>WT_4 | %SC<br>TAP_Rtr1_<br>ctk1_del<br>etion | UP<br>TAP_Rtr1_<br>ctk1_del<br>etion | # PSM<br>TAP_Rtr1_<br>ctk1_del<br>etion |
|-----------|---------|----------------------------|--------------------------|-------------------------|----------------------------|--------------------------|-------------------------|----------------------------|--------------------------|-------------------------|----------------------------|---------------------------------------|--------------------------------------|-----------------------------------------|
| 398364417 | SAH1    | 1                          | 0                        | 0                       | 0                          | 17.59                    | 7                       | 24                         | 2.45                     | 1                       | 1                          | 0                                     | 0                                    | 0                                       |
| 6320396   | RVB1    | 0                          | 0                        | 0                       | 0                          | 44.28                    | 13                      | 88                         | 0                        | 0                       | 0                          | 0                                     | 0                                    | 0                                       |
| 6320077   | CDC48   | 6                          | 0                        | 0                       | 0                          | 27.54                    | 15                      | 84                         | 0                        | 0                       | 0                          | 0                                     | 0                                    | 0                                       |
| 6325025   | FAS2    | 8                          | 0                        | 0                       | 0                          | 8.69                     | 9                       | 18                         | 0                        | 0                       | 0                          | 0                                     | 0                                    | 0                                       |
| 6324517   | THI20   | 0                          | 0                        | 0                       | 0                          | 3.09                     | 1                       | 1                          | 0                        | 0                       | 0                          | 0                                     | 0                                    | 0                                       |
| 6323030   | NOC3    | 0                          | 0                        | 0                       | 0                          | 3.77                     | 2                       | 3                          | 0                        | 0                       | 0                          | 0                                     | 0                                    | 0                                       |
| 6320143   | TSR1    | 0                          | 0                        | 0                       | 0                          | 0                        | 0                       | 0                          | 0                        | 0                       | 0                          | 0                                     | 0                                    | 0                                       |
| 6321318   | PRP43   | 0                          | 0                        | 0                       | 0                          | 14.86                    | 8                       | 18                         | 3.91                     | 3                       | 4                          | 0                                     | 0                                    | 0                                       |
| 6319618   | MAK5    | 0                          | 0                        | 0                       | 0                          | 3.36                     | 2                       | 7                          | 1.42                     | 1                       | 1                          | 0                                     | 0                                    | 0                                       |
| 398364755 | URB1    | 0                          | 0                        | 0                       | 0                          | 1.42                     | 2                       | 3                          | 0                        | 0                       | 0                          | 0                                     | 0                                    | 0                                       |
| 6320780   | POL5    | 0                          | 0                        | 0                       | 0                          | 0                        | 0                       | 0                          | 0                        | 0                       | 0                          | 0                                     | 0                                    | 0                                       |
| 6325021   | RVB2    | 2                          | 0                        | 0                       | 0                          | 32.70                    | 11                      | 48                         | 0                        | 0                       | 0                          | 0                                     | 0                                    | 0                                       |
| 6322350   | CCT7    | 1                          | 0                        | 0                       | 0                          | 25.09                    | 10                      | 59                         | 0                        | 0                       | 0                          | 0                                     | 0                                    | 0                                       |
| 14270688  | UTP20   | 0                          | 0                        | 0                       | 0                          | 1.72                     | 3                       | 5                          | 0                        | 0                       | 0                          | 0                                     | 0                                    | 0                                       |
| 6324197   | KRE33   | 0                          | 0                        | 0                       | 0                          | 10.89                    | 7                       | 11                         | 0.85                     | 1                       | 2                          | 0                                     | 0                                    | 0                                       |
| 6321816   | RPN1    | 0                          | 0                        | 0                       | 0                          | 8.86                     | 6                       | 25                         | 0                        | 0                       | 0                          | 0                                     | 0                                    | 0                                       |
| 6322901   | NAP1    | 3                          | 0                        | 0                       | 0                          | 20.38                    | 5                       | 12                         | 0                        | 0                       | 0                          | 0                                     | 0                                    | 0                                       |
| 6320030   | GLT1    | 3                          | 0                        | 0                       | 0                          | 14.73                    | 21                      | 65                         | 0                        | 0                       | 0                          | 0.56                                  | 1                                    | 2                                       |
| 6323470   | CAR2    | 2                          | 0                        | 0                       | 0                          | 11.32                    | 3                       | 5                          | 0                        | 0                       | 0                          | 0                                     | 0                                    | 0                                       |
| 6320956   | KAP123  | 1                          | 0                        | 0                       | 0                          | 44.38                    | 29                      | 205                        | 0                        | 0                       | 0                          | 0                                     | 0                                    | 0                                       |
| 398365941 | SEC7    | 0                          | 0                        | 0                       | 0                          | 13.64                    | 16                      | 49                         | 0                        | 0                       | 0                          | 0.40                                  | 1                                    | 1                                       |
| 6323324   | GSP1    | 0                          | 0                        | 0                       | 0                          | 20.55                    | 4                       | 14                         | 4.57                     | 1                       | 1                          | 0                                     | 0                                    | 0                                       |
| 6322697   | GPM1    | 24                         | 4.86                     | 1                       | 2                          | 45.75                    | 10                      | 136                        | 14.17                    | 3                       | 5                          | 12.15                                 | 2                                    | 10                                      |
| 6325013   | SRP68   | 0                          | 0                        | 0                       | 0                          | 9.68                     | 4                       | 6                          | 0                        | 0                       | 0                          | 0                                     | 0                                    | 0                                       |
| 6322103   | AVT7    | 0                          | 0                        | 0                       | 0                          | 0                        | 0                       | 0                          | 0                        | 0                       | 0                          | 0                                     | 0                                    | 0                                       |
| 6322049   | CCT2    | 5                          | 6.45                     | 2                       | 3                          | 59.58                    | 20                      | 111                        | 0                        | 0                       | 0                          | 0                                     | 0                                    | 0                                       |
| 330443694 | SLA2    | 0                          | 0                        | 0                       | 0                          | 23.66                    | 13                      | 39                         | 2.07                     | 2                       | 2                          | 0                                     | 0                                    | 0                                       |
| 6321804   | YSC84   | 0                          | 0                        | 0                       | 0                          | 25.00                    | 7                       | 42                         | 1.71                     | 1                       | 1                          | 0                                     | 0                                    | 0                                       |
| 398366021 | CCT6    | 1                          | 0                        | 0                       | 0                          | 42.86                    | 14                      | 63                         | 0                        | 0                       | 0                          | 0                                     | 0                                    | 0                                       |
| 6324042   | SEC21   | 0                          | 0                        | 0                       | 0                          | 16.79                    | 9                       | 22                         | 0                        | 0                       | 0                          | 0                                     | 0                                    | 0                                       |
| 398364741 | SCS2    | 0                          | 0                        | 0                       | 0                          | 12.30                    | 2                       | 3                          | 0                        | 0                       | 0                          | 0                                     | 0                                    | 0                                       |
| 6325253   | LSP1    | 26                         | 0                        | 0                       | 0                          | 18.48                    | 4                       | 17                         | 3.52                     | 1                       | 1                          | 0                                     | 0                                    | 0                                       |
| 6321390   | RPT6    | 1                          | 0                        | 0                       | 0                          | 6.42                     | 2                       | 9                          | 0                        | 0                       | 0                          | 0                                     | 0                                    | 0                                       |
| 398364807 | PNC1    | 0                          | 0                        | 0                       | 0                          | 0                        | 0                       | 0                          | 0                        | 0                       | 0                          | 0                                     | 0                                    | 0                                       |
| 6325164   | NOG1    | 0                          | 0                        | 0                       | 0                          | 9.27                     | 4                       | 9                          | 0                        | 0                       | 0                          | 1.85                                  | 1                                    | 1                                       |
| 6319814   | GRX1    | 0                          | 0                        | 0                       | 0                          | 31.82                    | 3                       | 6                          | 0                        | 0                       | 0                          | 0                                     | 0                                    | 0                                       |
| 6322823   | MAE1    | 0                          | 2.39                     | 1                       | 2                          | 29.00                    | 11                      | 83                         | 0                        | 0                       | 0                          | 0                                     | 0                                    | 0                                       |

Table S1 - Smith-Kinnaman, *et al* (2014) Abbreviations: %SC = percent sequence coverage, UP = unique peptides, PSM = peptide spectrum matches

| Accession | Acronym | # PSM<br>TAP_Rtr1_<br>WT_1 | %SC<br>TAP_Rtr1_<br>WT_2 | UP<br>TAP_Rtr1_<br>WT_2 | # PSM<br>TAP_Rtr1_<br>WT_2 | %SC<br>TAP_Rtr1_<br>WT_3 | UP<br>TAP_Rtr1_<br>WT_3 | # PSM<br>TAP_Rtr1_<br>WT_3 | %SC<br>TAP_Rtr1_<br>WT_4 | UP<br>TAP_Rtr1_<br>WT_4 | # PSM<br>TAP_Rtr1_<br>WT_4 | %SC<br>TAP_Rtr1_<br>ctk1_del<br>etion | UP<br>TAP_Rtr1_<br>ctk1_del<br>etion | # PSM<br>TAP_Rtr1_<br>ctk1_del<br>etion |
|-----------|---------|----------------------------|--------------------------|-------------------------|----------------------------|--------------------------|-------------------------|----------------------------|--------------------------|-------------------------|----------------------------|---------------------------------------|--------------------------------------|-----------------------------------------|
| 6320255   | TPI1    | 4                          | 0                        | 0                       | 0                          | 8.06                     | 1                       | 3                          | 0                        | 0                       | 0                          | 6.05                                  | 1                                    | 2                                       |
| 6320983   | GDI1    | 0                          | 0                        | 0                       | 0                          | 0                        | 0                       | 0                          | 0                        | 0                       | 0                          | 0                                     | 0                                    | 0                                       |
| 398365205 | RPT5    | 0                          | 5.99                     | 2                       | 2                          | 33.64                    | 10                      | 39                         | 0                        | 0                       | 0                          | 0                                     | 0                                    | 0                                       |
| 6324992   | KEL3    | 0                          | 0                        | 0                       | 0                          | 0                        | 0                       | 0                          | 1.54                     | 1                       | 1                          | 0                                     | 0                                    | 0                                       |
| 6323028   | DNM1    | 0                          | 0                        | 0                       | 0                          | 20.48                    | 10                      | 28                         | 0                        | 0                       | 0                          | 0                                     | 0                                    | 0                                       |
| 398365977 | RPT4    | 1                          | 0                        | 0                       | 0                          | 16.93                    | 5                       | 13                         | 0                        | 0                       | 0                          | 0                                     | 0                                    | 0                                       |
| 6320058   | CCT4    | 1                          | 0                        | 0                       | 0                          | 21.59                    | 7                       | 48                         | 1.52                     | 1                       | 1                          | 3.03                                  | 1                                    | 2                                       |
| 6320379   | HMO1    | 0                          | 0                        | 0                       | 0                          | 4.88                     | 1                       | 7                          | 0                        | 0                       | 0                          | 0                                     | 0                                    | 0                                       |
| 6322508   | CYC1    | 0                          | 0                        | 0                       | 0                          | 7.34                     | 1                       | 1                          | 0                        | 0                       | 0                          | 0                                     | 0                                    | 0                                       |
| 6325137   | VPS30   | 0                          | 0                        | 0                       | 0                          | 0                        | 0                       | 0                          | 0                        | 0                       | 0                          | 0                                     | 0                                    | 0                                       |
| 6321301   | SEC27   | 0                          | 0                        | 0                       | 0                          | 16.20                    | 10                      | 39                         | 0                        | 0                       | 0                          | 1.80                                  | 1                                    | 2                                       |
| 6321673   | YHB1    | 0                          | 0                        | 0                       | 0                          | 42.86                    | 10                      | 72                         | 0                        | 0                       | 0                          | 0                                     | 0                                    | 0                                       |
| 27469359  | SYN8    | 0                          | 0                        | 0                       | 0                          | 0                        | 0                       | 0                          | 0                        | 0                       | 0                          | 0                                     | 0                                    | 0                                       |
| 6324433   | CDC33   | 0                          | 0                        | 0                       | 0                          | 30.52                    | 6                       | 27                         | 7.51                     | 1                       | 1                          | 0                                     | 0                                    | 0                                       |
| 6323571   | POB3    | 0                          | 0                        | 0                       | 0                          | 0                        | 0                       | 0                          | 0                        | 0                       | 0                          | 0                                     | 0                                    | 0                                       |
| 398365157 | NOP2    | 0                          | 0                        | 0                       | 0                          | 8.90                     | 4                       | 7                          | 0                        | 0                       | 0                          | 0                                     | 0                                    | 0                                       |
| 6321228   | YPT32   | 0                          | 0                        | 0                       | 0                          | 0                        | 0                       | 0                          | 0                        | 0                       | 0                          | 0                                     | 0                                    | 0                                       |
| 398366559 | RPT3    | 1                          | 0                        | 0                       | 0                          | 23.36                    | 6                       | 37                         | 0                        | 0                       | 0                          | 0                                     | 0                                    | 0                                       |
| 6322704   | RPT1    | 2                          | 0                        | 0                       | 0                          | 13.92                    | 5                       | 12                         | 0                        | 0                       | 0                          | 0                                     | 0                                    | 0                                       |
| 398366379 | PRT1    | 1                          | 0                        | 0                       | 0                          | 6.29                     | 4                       | 7                          | 0                        | 0                       | 0                          | 0                                     | 0                                    | 0                                       |
| 398365125 | PDA1    | 3                          | 0                        | 0                       | 0                          | 8.57                     | 3                       | 11                         | 0                        | 0                       | 0                          | 0                                     | 0                                    | 0                                       |
| 398364913 | GND1    | 23                         | 2.86                     | 1                       | 3                          | 12.07                    | 4                       | 11                         | 0                        | 0                       | 0                          | 14.31                                 | 5                                    | 13                                      |
| 6322637   | SAC1    | 0                          | 0                        | 0                       | 0                          | 0                        | 0                       | 0                          | 0                        | 0                       | 0                          | 0                                     | 0                                    | 0                                       |
| 398365933 | CYS4    | 17                         | 4.14                     | 1                       | 1                          | 46.15                    | 15                      | 97                         | 0                        | 0                       | 0                          | 0                                     | 0                                    | 0                                       |
| 6323903   | FAA4    | 0                          | 0                        | 0                       | 0                          | 12.39                    | 6                       | 22                         | 0                        | 0                       | 0                          | 0                                     | 0                                    | 0                                       |
| 6319806   | PDI1    | 10                         | 0                        | 0                       | 0                          | 4.21                     | 1                       | 3                          | 0                        | 0                       | 0                          | 0                                     | 0                                    | 0                                       |
| 6323512   | PHO84   | 0                          | 0                        | 0                       | 0                          | 0                        | 0                       | 0                          | 0                        | 0                       | 0                          | 0                                     | 0                                    | 0                                       |
| 6325367   | RPC40   | 0                          | 0                        | 0                       | 0                          | 25.07                    | 5                       | 18                         | 0                        | 0                       | 0                          | 0                                     | 0                                    | 0                                       |
| 6319835   | GBP2    | 0                          | 0                        | 0                       | 0                          | 0                        | 0                       | 0                          | 7.26                     | 3                       | 4                          | 0                                     | 0                                    | 0                                       |
| 6319290   | MYO4    | 0                          | 0                        | 0                       | 0                          | 8.16                     | 9                       | 15                         | 0                        | 0                       | 0                          | 0                                     | 0                                    | 0                                       |
| 14318531  | GCN20   | 0                          | 0                        | 0                       | 0                          | 0                        | 0                       | 0                          | 0                        | 0                       | 0                          | 0                                     | 0                                    | 0                                       |
| 6320869   | YPT31   | 0                          | 0                        | 0                       | 0                          | 0                        | 0                       | 0                          | 0                        | 0                       | 0                          | 0                                     | 0                                    | 0                                       |
| 398365617 | UTP22   | 0                          | 0                        | 0                       | 0                          | 7.03                     | 6                       | 13                         | 0                        | 0                       | 0                          | 0                                     | 0                                    | 0                                       |
| 398366209 | RTN1    | 5                          | 0                        | 0                       | 0                          | 5.76                     | 1                       | 2                          | 4.07                     | 1                       | 1                          | 4.07                                  | 1                                    | 1                                       |
| 6325097   | CDC60   | 0                          | 0                        | 0                       | 0                          | 1.38                     | 1                       | 1                          | 1.01                     | 1                       | 1                          | 0                                     | 0                                    | 0                                       |
| 6323294   | RPS28B  | 1                          | 0                        | 0                       | 0                          | 31.34                    | 2                       | 4                          | 13.43                    | 1                       | 1                          | 13.43                                 | 1                                    | 2                                       |
| 6325151   | SSE1    | 29                         | 0                        | 0                       | 0                          | 38.96                    | 18                      | 117                        | 0                        | 0                       | 0                          | 1.59                                  | 1                                    | 1                                       |





Table S1 - Smith-Kinnaman, *et al* (2014) Abbreviations: %SC = percent sequence coverage, UP = unique peptides, PSM = peptide spectrum matches

| Accession | Acronym | # PSM<br>TAP_Rtr1_<br>WT_1 | %SC<br>TAP_Rtr1_<br>WT_2 | UP<br>TAP_Rtr1_<br>WT_2 | # PSM<br>TAP_Rtr1_<br>WT_2 | %SC<br>TAP_Rtr1_<br>WT_3 | UP<br>TAP_Rtr1_<br>WT_3 | # PSM<br>TAP_Rtr1_<br>WT_3 | %SC<br>TAP_Rtr1_<br>WT_4 | UP<br>TAP_Rtr1_<br>WT_4 | # PSM<br>TAP_Rtr1_<br>WT_4 | %SC<br>TAP_Rtr1_<br>ctk1_del<br>etion | UP<br>TAP_Rtr1_<br>ctk1_del<br>etion | # PSM<br>TAP_Rtr1_<br>ctk1_del<br>etion |
|-----------|---------|----------------------------|--------------------------|-------------------------|----------------------------|--------------------------|-------------------------|----------------------------|--------------------------|-------------------------|----------------------------|---------------------------------------|--------------------------------------|-----------------------------------------|
| 398364441 | NOT3    | 0                          | 0                        | 0                       | 0                          | 9.21                     | 5                       | 9                          | 0                        | 0                       | 0                          | 0                                     | 0                                    | 0                                       |
| 398366191 | RPN13   | 0                          | 0                        | 0                       | 0                          | 28.21                    | 3                       | 12                         | 0                        | 0                       | 0                          | 0                                     | 0                                    | 0                                       |
| 6321453   | YGR016W | 0                          | 0                        | 0                       | 0                          | 5.26                     | 1                       | 1                          | 0                        | 0                       | 0                          | 0                                     | 0                                    | 0                                       |
| 6320930   | ILV1    | 1                          | 0                        | 0                       | 0                          | 48.96                    | 17                      | 97                         | 0                        | 0                       | 0                          | 0                                     | 0                                    | 0                                       |
| 6323016   | PUF3    | 0                          | 0                        | 0                       | 0                          | 3.19                     | 2                       | 4                          | 0                        | 0                       | 0                          | 0                                     | 0                                    | 0                                       |
| 37362700  | SRP72   | 0                          | 0                        | 0                       | 0                          | 21.88                    | 9                       | 21                         | 0                        | 0                       | 0                          | 0                                     | 0                                    | 0                                       |
| 6321326   | TAF6    | 0                          | 3.49                     | 1                       | 1                          | 12.98                    | 4                       | 9                          | 0                        | 0                       | 0                          | 0                                     | 0                                    | 0                                       |
| 6322565   | ADO1    | 0                          | 0                        | 0                       | 0                          | 0                        | 0                       | 0                          | 0                        | 0                       | 0                          | 0                                     | 0                                    | 0                                       |
| 6319722   | ISW1    | 0                          | 0                        | 0                       | 0                          | 5.58                     | 6                       | 16                         | 0.80                     | 1                       | 1                          | 0                                     | 0                                    | 0                                       |
| 330443605 | SET2    | 0                          | 0                        | 0                       | 0                          | 3.00                     | 2                       | 3                          | 0                        | 0                       | 0                          | 0                                     | 0                                    | 0                                       |
| 398365101 | ARP3    | 0                          | 0                        | 0                       | 0                          | 17.59                    | 5                       | 8                          | 0                        | 0                       | 0                          | 1.78                                  | 1                                    | 1                                       |
| 6321780   | STE20   | 0                          | 0                        | 0                       | 0                          | 9.80                     | 5                       | 8                          | 0                        | 0                       | 0                          | 0                                     | 0                                    | 0                                       |
| 6321776   | PRS3    | 0                          | 0                        | 0                       | 0                          | 37.50                    | 9                       | 34                         | 0                        | 0                       | 0                          | 0                                     | 0                                    | 0                                       |
| 6323214   | RPL37A  | 8                          | 0                        | 0                       | 0                          | 0                        | 0                       | 0                          | 0                        | 0                       | 0                          | 0                                     | 0                                    | 0                                       |
| 6321757   | ECM29   | 0                          | 0                        | 0                       | 0                          | 8.57                     | 12                      | 19                         | 0                        | 0                       | 0                          | 0                                     | 0                                    | 0                                       |
| 398365069 | ADH5    | 1                          | 0                        | 0                       | 0                          | 2.28                     | 1                       | 5                          | 0                        | 0                       | 0                          | 0                                     | 0                                    | 0                                       |
| 398365695 | CPR8    | 0                          | 0                        | 0                       | 0                          | 0                        | 0                       | 0                          | 0                        | 0                       | 0                          | 0                                     | 0                                    | 0                                       |
| 6319854   | RVS161  | 0                          | 7.92                     | 1                       | 1                          | 56.98                    | 11                      | 106                        | 4.15                     | 1                       | 2                          | 0                                     | 0                                    | 0                                       |
| 6324620   | DBP5    | 0                          | 0                        | 0                       | 0                          | 49.79                    | 15                      | 66                         | 0                        | 0                       | 0                          | 0                                     | 0                                    | 0                                       |
| 6321399   | YGL039W | 0                          | 0                        | 0                       | 0                          | 16.95                    | 3                       | 6                          | 0                        | 0                       | 0                          | 0                                     | 0                                    | 0                                       |
| 398365061 | SUP45   | 1                          | 0                        | 0                       | 0                          | 44.62                    | 14                      | 69                         | 0                        | 0                       | 0                          | 0                                     | 0                                    | 0                                       |
| 6324673   | KTR1    | 0                          | 0                        | 0                       | 0                          | 0                        | 0                       | 0                          | 0                        | 0                       | 0                          | 0                                     | 0                                    | 0                                       |
| 6323387   | ILV5    | 0                          | 5.32                     | 1                       | 1                          | 5.32                     | 1                       | 4                          | 0                        | 0                       | 0                          | 0                                     | 0                                    | 0                                       |
| 6323795   | TIF34   | 0                          | 5.48                     | 1                       | 1                          | 36.31                    | 8                       | 19                         | 2.31                     | 1                       | 1                          | 0                                     | 0                                    | 0                                       |
| 6322667   | PRS1    | 2                          | 0                        | 0                       | 0                          | 18.27                    | 6                       | 21                         | 0                        | 0                       | 0                          | 0                                     | 0                                    | 0                                       |
| 6320910   | RGI1    | 0                          | 0                        | 0                       | 0                          | 0                        | 0                       | 0                          | 0                        | 0                       | 0                          | 0                                     | 0                                    | 0                                       |
| 398365575 | HOM6    | 0                          | 6.69                     | 1                       | 1                          | 0                        | 0                       | 0                          | 0                        | 0                       | 0                          | 0                                     | 0                                    | 0                                       |
| 6323916   | TIF11   | 0                          | 0                        | 0                       | 0                          | 7.84                     | 1                       | 1                          | 0                        | 0                       | 0                          | 0                                     | 0                                    | 0                                       |
| 6321612   | RBG2    | 10                         | 0                        | 0                       | 0                          | 21.74                    | 5                       | 20                         | 0                        | 0                       | 0                          | 0                                     | 0                                    | 0                                       |
| 6323225   | PWP1    | 0                          | 0                        | 0                       | 0                          | 2.26                     | 1                       | 1                          | 3.99                     | 2                       | 2                          | 0                                     | 0                                    | 0                                       |
| 6324737   | SSP1    | 0                          | 0                        | 0                       | 0                          | 0                        | 0                       | 0                          | 0                        | 0                       | 0                          | 0                                     | 0                                    | 0                                       |
| 6323450   | CDC73   | 0                          | 0                        | 0                       | 0                          | 2.54                     | 1                       | 1                          | 0                        | 0                       | 0                          | 3.56                                  | 1                                    | 1                                       |
| 398365461 | SRP40   | 0                          | 0                        | 0                       | 0                          | 0                        | 0                       | 0                          | 0                        | 0                       | 0                          | 0                                     | 0                                    | 0                                       |
| 6320708   | RPL37B  | 0                          | 0                        | 0                       | 0                          | 0                        | 0                       | 0                          | 0                        | 0                       | 0                          | 0                                     | 0                                    | 0                                       |
| 398364957 | MKT1    | 0                          | 0                        | 0                       | 0                          | 7.71                     | 4                       | 7                          | 0                        | 0                       | 0                          | 0                                     | 0                                    | 0                                       |
| 6320079   | YDL124W | 0                          | 0                        | 0                       | 0                          | 0                        | 0                       | 0                          | 0                        | 0                       | 0                          | 0                                     | 0                                    | 0                                       |
| 398364371 | RSC8    | 0                          | 0                        | 0                       | 0                          | 6.46                     | 3                       | 8                          | 0                        | 0                       | 0                          | 0                                     | 0                                    | 0                                       |



Table S1 - Smith-Kinnaman, *et al* (2014) Abbreviations: %SC = percent sequence coverage, UP = unique peptides, PSM = peptide spectrum matches

| Accession | Acronym | # PSM<br>TAP_Rtr1_<br>WT_1 | %SC<br>TAP_Rtr1_<br>WT_2 | UP<br>TAP_Rtr1_<br>WT_2 | # PSM<br>TAP_Rtr1_<br>WT_2 | %SC<br>TAP_Rtr1_<br>WT_3 | UP<br>TAP_Rtr1_<br>WT_3 | # PSM<br>TAP_Rtr1_<br>WT_3 | %SC<br>TAP_Rtr1_<br>WT_4 | UP<br>TAP_Rtr1_<br>WT_4 | # PSM<br>TAP_Rtr1_<br>WT_4 | %SC<br>TAP_Rtr1_<br>ctk1_del<br>etion | UP<br>TAP_Rtr1_<br>ctk1_del<br>etion | # PSM<br>TAP_Rtr1_<br>ctk1_del<br>etion |
|-----------|---------|----------------------------|--------------------------|-------------------------|----------------------------|--------------------------|-------------------------|----------------------------|--------------------------|-------------------------|----------------------------|---------------------------------------|--------------------------------------|-----------------------------------------|
| 6321024   | ECM32   | 0                          | 0                        | 0                       | 0                          | 0                        | 0                       | 0                          | 0                        | 0                       | 0                          | 0                                     | 0                                    | 0                                       |
| 37362660  | FUR1    | 0                          | 8.80                     | 1                       | 2                          | 33.33                    | 4                       | 17                         | 0                        | 0                       | 0                          | 0                                     | 0                                    | 0                                       |
| 398364665 | SEC18   | 2                          | 0                        | 0                       | 0                          | 24.93                    | 14                      | 43                         | 0                        | 0                       | 0                          | 0                                     | 0                                    | 0                                       |
| 6323391   | ADE13   | 0                          | 0                        | 0                       | 0                          | 0                        | 0                       | 0                          | 0                        | 0                       | 0                          | 0                                     | 0                                    | 0                                       |
| 6323699   | STV1    | 0                          | 0                        | 0                       | 0                          | 0                        | 0                       | 0                          | 0                        | 0                       | 0                          | 0                                     | 0                                    | 0                                       |
| 6321412   | TRP5    | 8                          | 0                        | 0                       | 0                          | 56.58                    | 26                      | 212                        | 0                        | 0                       | 0                          | 0                                     | 0                                    | 0                                       |
| 6321973   | OYE2    | 0                          | 0                        | 0                       | 0                          | 0                        | 0                       | 0                          | 0                        | 0                       | 0                          | 0                                     | 0                                    | 0                                       |
| 6321801   | ARD1    | 0                          | 0                        | 0                       | 0                          | 6.30                     | 1                       | 1                          | 0                        | 0                       | 0                          | 0                                     | 0                                    | 0                                       |
| 10383761  | HIS4    | 0                          | 0                        | 0                       | 0                          | 2.13                     | 1                       | 1                          | 0                        | 0                       | 0                          | 0                                     | 0                                    | 0                                       |
| 398365759 | SAC6    | 0                          | 0                        | 0                       | 0                          | 16.20                    | 6                       | 11                         | 0                        | 0                       | 0                          | 0                                     | 0                                    | 0                                       |
| 6321721   | BGL2    | 0                          | 0                        | 0                       | 0                          | 0                        | 0                       | 0                          | 0                        | 0                       | 0                          | 0                                     | 0                                    | 0                                       |
| 398364979 | CCZ1    | 0                          | 0                        | 0                       | 0                          | 0                        | 0                       | 0                          | 0                        | 0                       | 0                          | 0                                     | 0                                    | 0                                       |
| 42742256  | VTC4    | 0                          | 0                        | 0                       | 0                          | 0                        | 0                       | 0                          | 0                        | 0                       | 0                          | 0                                     | 0                                    | 0                                       |
| 6321814   | THR1    | 0                          | 0                        | 0                       | 0                          | 21.57                    | 5                       | 20                         | 0                        | 0                       | 0                          | 3.08                                  | 1                                    | 1                                       |
| 10383798  | PHO87   | 0                          | 0                        | 0                       | 0                          | 0                        | 0                       | 0                          | 0                        | 0                       | 0                          | 0                                     | 0                                    | 0                                       |
| 6319847   | CDC10   | 0                          | 0                        | 0                       | 0                          | 11.49                    | 2                       | 6                          | 0                        | 0                       | 0                          | 0                                     | 0                                    | 0                                       |
| 398365363 | URA8    | 0                          | 0                        | 0                       | 0                          | 11.25                    | 3                       | 21                         | 0                        | 0                       | 0                          | 0                                     | 0                                    | 0                                       |
| 6323138   | AHP1    | 0                          | 0                        | 0                       | 0                          | 11.36                    | 1                       | 7                          | 0                        | 0                       | 0                          | 0                                     | 0                                    | 0                                       |
| 6320657   | UTP6    | 0                          | 0                        | 0                       | 0                          | 0                        | 0                       | 0                          | 0                        | 0                       | 0                          | 0                                     | 0                                    | 0                                       |
| 6321919   | YHR127W | 0                          | 0                        | 0                       | 0                          | 0                        | 0                       | 0                          | 0                        | 0                       | 0                          | 0                                     | 0                                    | 0                                       |
| 41629688  | PSP2    | 0                          | 0                        | 0                       | 0                          | 7.08                     | 3                       | 22                         | 11.80                    | 5                       | 10                         | 0                                     | 0                                    | 0                                       |
| 398364633 | APS3    | 0                          | 0                        | 0                       | 0                          | 11.86                    | 2                       | 2                          | 0                        | 0                       | 0                          | 0                                     | 0                                    | 0                                       |
| 6322843   | MRT4    | 0                          | 0                        | 0                       | 0                          | 24.15                    | 4                       | 13                         | 0                        | 0                       | 0                          | 0                                     | 0                                    | 0                                       |
| 330443486 | PAT1    | 1                          | 0                        | 0                       | 0                          | 9.30                     | 4                       | 5                          | 0                        | 0                       | 0                          | 0                                     | 0                                    | 0                                       |
| 37362659  | RRP3    | 0                          | 0                        | 0                       | 0                          | 31.34                    | 11                      | 42                         | 2.20                     | 1                       | 1                          | 0                                     | 0                                    | 0                                       |
| 6320845   | SEC3    | 0                          | 0                        | 0                       | 0                          | 7.49                     | 6                       | 10                         | 0                        | 0                       | 0                          | 0                                     | 0                                    | 0                                       |
| 6324791   | RFC1    | 0                          | 0                        | 0                       | 0                          | 7.32                     | 5                       | 10                         | 0                        | 0                       | 0                          | 0                                     | 0                                    | 0                                       |
| 6325369   | MRD1    | 0                          | 0                        | 0                       | 0                          | 6.76                     | 5                       | 9                          | 0                        | 0                       | 0                          | 0                                     | 0                                    | 0                                       |
| 6322635   | YRA2    | 0                          | 0                        | 0                       | 0                          | 0                        | 0                       | 0                          | 9.36                     | 1                       | 1                          | 0                                     | 0                                    | 0                                       |
| 6320368   | SEC1    | 0                          | 0                        | 0                       | 0                          | 21.69                    | 9                       | 31                         | 0                        | 0                       | 0                          | 0                                     | 0                                    | 0                                       |
| 398364935 | UBP3    | 0                          | 2.30                     | 2                       | 2                          | 4.93                     | 3                       | 10                         | 0.99                     | 1                       | 1                          | 0                                     | 0                                    | 0                                       |
| 6320789   | GLY1    | 0                          | 0                        | 0                       | 0                          | 4.65                     | 1                       | 1                          | 0                        | 0                       | 0                          | 0                                     | 0                                    | 0                                       |
| 6325172   | SEC16   | 0                          | 0                        | 0                       | 0                          | 8.75                     | 11                      | 25                         | 0                        | 0                       | 0                          | 0                                     | 0                                    | 0                                       |
| 398364311 | TMA20   | 0                          | 0                        | 0                       | 0                          | 6.08                     | 1                       | 1                          | 0                        | 0                       | 0                          | 0                                     | 0                                    | 0                                       |
| 6320926   | UTP7    | 0                          | 0                        | 0                       | 0                          | 3.25                     | 1                       | 4                          | 0                        | 0                       | 0                          | 0                                     | 0                                    | 0                                       |
| 330443568 | ENP2    | 0                          | 0                        | 0                       | 0                          | 2.12                     | 1                       | 2                          | 0                        | 0                       | 0                          | 0                                     | 0                                    | 0                                       |
| 6324328   | CIT1    | 0                          | 0                        | 0                       | 0                          | 2.51                     | 1                       | 1                          | 0                        | 0                       | 0                          | 0                                     | 0                                    | 0                                       |

Table S1 - Smith-Kinnaman, *et al* (2014) Abbreviations: %SC = percent sequence coverage, UP = unique peptides, PSM = peptide spectrum matches

| Accession | Acronym | # PSM<br>TAP_Rtr1_<br>WT_1 | %SC<br>TAP_Rtr1_<br>WT_2 | UP<br>TAP_Rtr1_<br>WT_2 | # PSM<br>TAP_Rtr1_<br>WT_2 | %SC<br>TAP_Rtr1_<br>WT_3 | UP<br>TAP_Rtr1_<br>WT_3 | # PSM<br>TAP_Rtr1_<br>WT_3 | %SC<br>TAP_Rtr1_<br>WT_4 | UP<br>TAP_Rtr1_<br>WT_4 | # PSM<br>TAP_Rtr1_<br>WT_4 | %SC<br>TAP_Rtr1_<br>ctk1_del<br>etion | UP<br>TAP_Rtr1_<br>ctk1_del<br>etion | # PSM<br>TAP_Rtr1_<br>ctk1_del<br>etion |
|-----------|---------|----------------------------|--------------------------|-------------------------|----------------------------|--------------------------|-------------------------|----------------------------|--------------------------|-------------------------|----------------------------|---------------------------------------|--------------------------------------|-----------------------------------------|
| 6322845   | CAP1    | 1                          | 0                        | 0                       | 0                          | 13.06                    | 2                       | 5                          | 0                        | 0                       | 0                          | 0                                     | 0                                    | 0                                       |
| 6323625   | PPZ1    | 0                          | 0                        | 0                       | 0                          | 3.90                     | 2                       | 3                          | 0                        | 0                       | 0                          | 0                                     | 0                                    | 0                                       |
| 6321267   | ROK1    | 0                          | 0                        | 0                       | 0                          | 9.04                     | 3                       | 10                         | 0                        | 0                       | 0                          | 0                                     | 0                                    | 0                                       |
| 6321422   | KAP122  | 0                          | 0                        | 0                       | 0                          | 6.66                     | 4                       | 6                          | 0                        | 0                       | 0                          | 0                                     | 0                                    | 0                                       |
| 6323717   | ABF2    | 9                          | 0                        | 0                       | 0                          | 0                        | 0                       | 0                          | 0                        | 0                       | 0                          | 0                                     | 0                                    | 0                                       |
| 27808701  | IST2    | 0                          | 0                        | 0                       | 0                          | 0                        | 0                       | 0                          | 0                        | 0                       | 0                          | 0                                     | 0                                    | 0                                       |
| 6322942   | TGL4    | 0                          | 0                        | 0                       | 0                          | 0                        | 0                       | 0                          | 0                        | 0                       | 0                          | 0                                     | 0                                    | 0                                       |
| 6319307   | CYS3    | 2                          | 0                        | 0                       | 0                          | 7.87                     | 2                       | 7                          | 0                        | 0                       | 0                          | 0                                     | 0                                    | 0                                       |
| 6322719   | SHE2    | 0                          | 0                        | 0                       | 0                          | 10.98                    | 2                       | 2                          | 0                        | 0                       | 0                          | 0                                     | 0                                    | 0                                       |
| 6323837   | SSO2    | 0                          | 0                        | 0                       | 0                          | 0                        | 0                       | 0                          | 0                        | 0                       | 0                          | 0                                     | 0                                    | 0                                       |
| 6319923   | SRB8    | 0                          | 0                        | 0                       | 0                          | 0                        | 0                       | 0                          | 0                        | 0                       | 0                          | 0                                     | 0                                    | 0                                       |
| 6321290   | ARO2    | 0                          | 0                        | 0                       | 0                          | 6.65                     | 2                       | 2                          | 0                        | 0                       | 0                          | 0                                     | 0                                    | 0                                       |
| 6325072   | MRN1    | 0                          | 0                        | 0                       | 0                          | 0                        | 0                       | 0                          | 0                        | 0                       | 0                          | 0                                     | 0                                    | 0                                       |
| 6324291   | IDH1    | 0                          | 0                        | 0                       | 0                          | 14.72                    | 4                       | 5                          | 0                        | 0                       | 0                          | 0                                     | 0                                    | 0                                       |
| 6325024   | SSO1    | 0                          | 0                        | 0                       | 0                          | 0                        | 0                       | 0                          | 0                        | 0                       | 0                          | 0                                     | 0                                    | 0                                       |
| 398366609 | PPN1    | 0                          | 0                        | 0                       | 0                          | 2.82                     | 1                       | 2                          | 0                        | 0                       | 0                          | 0                                     | 0                                    | 0                                       |
| 6323639   | GLO1    | 0                          | 0                        | 0                       | 0                          | 0                        | 0                       | 0                          | 0                        | 0                       | 0                          | 0                                     | 0                                    | 0                                       |
| 6321832   | NCP1    | 3                          | 0                        | 0                       | 0                          | 0                        | 0                       | 0                          | 0                        | 0                       | 0                          | 0                                     | 0                                    | 0                                       |
| 398364239 | FRD1    | 0                          | 0                        | 0                       | 0                          | 3.40                     | 1                       | 1                          | 0                        | 0                       | 0                          | 0                                     | 0                                    | 0                                       |
| 6320235   | PST2    | 5                          | 0                        | 0                       | 0                          | 19.70                    | 2                       | 8                          | 0                        | 0                       | 0                          | 0                                     | 0                                    | 0                                       |
| 6322770   | VMA5    | 0                          | 4.34                     | 1                       | 2                          | 38.27                    | 11                      | 105                        | 0                        | 0                       | 0                          | 0                                     | 0                                    | 0                                       |
| 6325209   | CAM1    | 1                          | 0                        | 0                       | 0                          | 0                        | 0                       | 0                          | 5.06                     | 2                       | 2                          | 0                                     | 0                                    | 0                                       |
| 6320041   | DHH1    | 4                          | 0                        | 0                       | 0                          | 29.25                    | 10                      | 53                         | 6.32                     | 3                       | 4                          | 0                                     | 0                                    | 0                                       |
| 6323635   | ERG6    | 0                          | 0                        | 0                       | 0                          | 4.70                     | 1                       | 1                          | 0                        | 0                       | 0                          | 0                                     | 0                                    | 0                                       |
| 6319698   | PDB1    | 0                          | 0                        | 0                       | 0                          | 17.21                    | 4                       | 11                         | 0                        | 0                       | 0                          | 0                                     | 0                                    | 0                                       |
| 398365225 | IMD2    | 0                          | 0                        | 0                       | 0                          | 4.40                     | 2                       | 3                          | 0                        | 0                       | 0                          | 2.87                                  | 1                                    | 1                                       |
| 6324990   | DIP5    | 0                          | 0                        | 0                       | 0                          | 0                        | 0                       | 0                          | 0                        | 0                       | 0                          | 0                                     | 0                                    | 0                                       |
| 6323585   | IMD4    | 2                          | 3.05                     | 1                       | 1                          | 5.92                     | 2                       | 3                          | 0                        | 0                       | 0                          | 2.86                                  | 1                                    | 1                                       |
| 6323386   | TAL1    | 1                          | 0                        | 0                       | 0                          | 0                        | 0                       | 0                          | 0                        | 0                       | 0                          | 0                                     | 0                                    | 0                                       |
| 398366255 | IMD3    | 2                          | 3.06                     | 1                       | 1                          | 5.93                     | 2                       | 3                          | 0                        | 0                       | 0                          | 2.87                                  | 1                                    | 1                                       |
| 6319426   | COR1    | 0                          | 0                        | 0                       | 0                          | 0                        | 0                       | 0                          | 0                        | 0                       | 0                          | 0                                     | 0                                    | 0                                       |
| 398364269 | SEC24   | 0                          | 0                        | 0                       | 0                          | 3.13                     | 2                       | 3                          | 0                        | 0                       | 0                          | 0                                     | 0                                    | 0                                       |
| 6320695   | RIB3    | 0                          | 0                        | 0                       | 0                          | 0                        | 0                       | 0                          | 0                        | 0                       | 0                          | 0                                     | 0                                    | 0                                       |
| 398364515 | URM1    | 0                          | 0                        | 0                       | 0                          | 13.13                    | 1                       | 1                          | 0                        | 0                       | 0                          | 0                                     | 0                                    | 0                                       |
| 398364803 | GLC7    | 0                          | 0                        | 0                       | 0                          | 19.55                    | 4                       | 11                         | 0                        | 0                       | 0                          | 0                                     | 0                                    | 0                                       |
| 398365877 | HOM2    | 1                          | 0                        | 0                       | 0                          | 20.82                    | 5                       | 19                         | 0                        | 0                       | 0                          | 0                                     | 0                                    | 0                                       |
| 6324428   | NOP8    | 0                          | 0                        | 0                       | 0                          | 2.69                     | 1                       | 1                          | 0                        | 0                       | 0                          | 0                                     | 0                                    | 0                                       |



Table S1 - Smith-Kinnaman, *et al* (2014) Abbreviations: %SC = percent sequence coverage, UP = unique peptides, PSM = peptide spectrum matches

| Accession | Acronym | # PSM<br>TAP_Rtr1_<br>WT_1 | %SC<br>TAP_Rtr1_<br>WT_2 | UP<br>TAP_Rtr1_<br>WT_2 | # PSM<br>TAP_Rtr1_<br>WT_2 | %SC<br>TAP_Rtr1_<br>WT_3 | UP<br>TAP_Rtr1_<br>WT_3 | # PSM<br>TAP_Rtr1_<br>WT_3 | %SC<br>TAP_Rtr1_<br>WT_4 | UP<br>TAP_Rtr1_<br>WT_4 | # PSM<br>TAP_Rtr1_<br>WT_4 | %SC<br>TAP_Rtr1_<br>ctk1_del<br>etion | UP<br>TAP_Rtr1_<br>ctk1_del<br>etion | # PSM<br>TAP_Rtr1_<br>ctk1_del<br>etion |
|-----------|---------|----------------------------|--------------------------|-------------------------|----------------------------|--------------------------|-------------------------|----------------------------|--------------------------|-------------------------|----------------------------|---------------------------------------|--------------------------------------|-----------------------------------------|
| 6324550   | IFM1    | 0                          | 0                        | 0                       | 0                          | 1.92                     | 1                       | 1                          | 0                        | 0                       | 0                          | 0                                     | 0                                    | 0                                       |
| 6324950   | ALD4    | 1                          | 0                        | 0                       | 0                          | 6.55                     | 2                       | 2                          | 0                        | 0                       | 0                          | 0                                     | 0                                    | 0                                       |
| 6324635   | CKA2    | 0                          | 0                        | 0                       | 0                          | 17.11                    | 4                       | 7                          | 0                        | 0                       | 0                          | 0                                     | 0                                    | 0                                       |
| 6319849   | YCP4    | 0                          | 0                        | 0                       | 0                          | 0                        | 0                       | 0                          | 0                        | 0                       | 0                          | 0                                     | 0                                    | 0                                       |
| 6325202   | LGE1    | 0                          | 0                        | 0                       | 0                          | 0                        | 0                       | 0                          | 0                        | 0                       | 0                          | 0                                     | 0                                    | 0                                       |
| 398366027 | SUR4    | 0                          | 0                        | 0                       | 0                          | 0                        | 0                       | 0                          | 0                        | 0                       | 0                          | 0                                     | 0                                    | 0                                       |
| 6321641   | PCT1    | 0                          | 0                        | 0                       | 0                          | 4.72                     | 1                       | 2                          | 0                        | 0                       | 0                          | 0                                     | 0                                    | 0                                       |
| 6325280   | EAF3    | 0                          | 0                        | 0                       | 0                          | 6.98                     | 2                       | 2                          | 0                        | 0                       | 0                          | 0                                     | 0                                    | 0                                       |
| 6320803   | MCM3    | 0                          | 0                        | 0                       | 0                          | 14.52                    | 10                      | 24                         | 0                        | 0                       | 0                          | 0                                     | 0                                    | 0                                       |
| 6323872   | SKY1    | 0                          | 0                        | 0                       | 0                          | 0                        | 0                       | 0                          | 0                        | 0                       | 0                          | 0                                     | 0                                    | 0                                       |
| 6325140   | IDI1    | 0                          | 0                        | 0                       | 0                          | 0                        | 0                       | 0                          | 0                        | 0                       | 0                          | 0                                     | 0                                    | 0                                       |
| 6320049   | SAS10   | 0                          | 0                        | 0                       | 0                          | 5.74                     | 2                       | 2                          | 0                        | 0                       | 0                          | 0                                     | 0                                    | 0                                       |
| 6324989   | DIM1    | 0                          | 0                        | 0                       | 0                          | 9.12                     | 3                       | 4                          | 3.46                     | 1                       | 1                          | 0                                     | 0                                    | 0                                       |
| 398366039 | PBP1    | 14                         | 7.62                     | 3                       | 7                          | 16.20                    | 7                       | 26                         | 3.32                     | 2                       | 2                          | 0                                     | 0                                    | 0                                       |
| 6323088   | REX2    | 0                          | 0                        | 0                       | 0                          | 0                        | 0                       | 0                          | 0                        | 0                       | 0                          | 0                                     | 0                                    | 0                                       |
| 6324899   | PRO2    | 0                          | 0                        | 0                       | 0                          | 4.17                     | 1                       | 2                          | 0                        | 0                       | 0                          | 0                                     | 0                                    | 0                                       |
| 398365467 | YNL010W | 0                          | 0                        | 0                       | 0                          | 0                        | 0                       | 0                          | 0                        | 0                       | 0                          | 0                                     | 0                                    | 0                                       |
| 41629671  | SEA4    | 0                          | 0                        | 0                       | 0                          | 0                        | 0                       | 0                          | 0                        | 0                       | 0                          | 0                                     | 0                                    | 0                                       |
| 6320704   | PUF6    | 0                          | 0                        | 0                       | 0                          | 1.68                     | 1                       | 1                          | 0                        | 0                       | 0                          | 0                                     | 0                                    | 0                                       |
| 6323650   | PLB1    | 0                          | 0                        | 0                       | 0                          | 6.33                     | 1                       | 1                          | 0                        | 0                       | 0                          | 0                                     | 0                                    | 0                                       |
| 6323158   | DIP2    | 0                          | 0                        | 0                       | 0                          | 1.27                     | 1                       | 1                          | 0                        | 0                       | 0                          | 0                                     | 0                                    | 0                                       |
| 6322727   | SRP21   | 0                          | 0                        | 0                       | 0                          | 4.79                     | 1                       | 2                          | 0                        | 0                       | 0                          | 0                                     | 0                                    | 0                                       |
| 14318504  | MDJ1    | 0                          | 0                        | 0                       | 0                          | 10.76                    | 3                       | 5                          | 0                        | 0                       | 0                          | 0                                     | 0                                    | 0                                       |
| 6322878   | GCN3    | 0                          | 0                        | 0                       | 0                          | 16.39                    | 3                       | 11                         | 0                        | 0                       | 0                          | 0                                     | 0                                    | 0                                       |
| 330443380 | PSK1    | 0                          | 0                        | 0                       | 0                          | 5.16                     | 4                       | 5                          | 0                        | 0                       | 0                          | 0                                     | 0                                    | 0                                       |
| 398364789 | UFD4    | 0                          | 0                        | 0                       | 0                          | 8.56                     | 8                       | 13                         | 0                        | 0                       | 0                          | 0                                     | 0                                    | 0                                       |
| 6319903   | PWP2    | 0                          | 0                        | 0                       | 0                          | 0                        | 0                       | 0                          | 0                        | 0                       | 0                          | 0                                     | 0                                    | 0                                       |
| 6324613   | CKB2    | 0                          | 0                        | 0                       | 0                          | 0                        | 0                       | 0                          | 0                        | 0                       | 0                          | 0                                     | 0                                    | 0                                       |
| 6324568   | TOP1    | 0                          | 0                        | 0                       | 0                          | 0                        | 0                       | 0                          | 0                        | 0                       | 0                          | 0                                     | 0                                    | 0                                       |
| 398365393 | MDM32   | 0                          | 0                        | 0                       | 0                          | 0                        | 0                       | 0                          | 0                        | 0                       | 0                          | 0                                     | 0                                    | 0                                       |
| 6322731   | VPH2    | 0                          | 0                        | 0                       | 0                          | 0                        | 0                       | 0                          | 0                        | 0                       | 0                          | 0                                     | 0                                    | 0                                       |
| 6323653   | HXT2    | 0                          | 0                        | 0                       | 0                          | 0                        | 0                       | 0                          | 0                        | 0                       | 0                          | 0                                     | 0                                    | 0                                       |
| 6320236   | MRH1    | 0                          | 0                        | 0                       | 0                          | 0                        | 0                       | 0                          | 0                        | 0                       | 0                          | 0                                     | 0                                    | 0                                       |
| 398364559 | NSP1    | 2                          | 1.82                     | 1                       | 1                          | 2.07                     | 1                       | 2                          | 0                        | 0                       | 0                          | 0                                     | 0                                    | 0                                       |
| 6321498   | ADE6    | 0                          | 0                        | 0                       | 0                          | 6.55                     | 6                       | 16                         | 0                        | 0                       | 0                          | 0                                     | 0                                    | 0                                       |
| 6319326   | ADE1    | 0                          | 0                        | 0                       | 0                          | 3.92                     | 1                       | 1                          | 0                        | 0                       | 0                          | 0                                     | 0                                    | 0                                       |
| 6321812   | MYO1    | 14                         | 0                        | 0                       | 0                          | 3.37                     | 5                       | 8                          | 0                        | 0                       | 0                          | 0                                     | 0                                    | 0                                       |







Table S1 - Smith-Kinnaman, *et al* (2014) Abbreviations: %SC = percent sequence coverage, UP = unique peptides, PSM = peptide spectrum matches

| Accession | Acronym | # PSM<br>TAP_Rtr1_<br>WT_1 | %SC<br>TAP_Rtr1_<br>WT_2 | UP<br>TAP_Rtr1_<br>WT_2 | # PSM<br>TAP_Rtr1_<br>WT_2 | %SC<br>TAP_Rtr1_<br>WT_3 | UP<br>TAP_Rtr1_<br>WT_3 | # PSM<br>TAP_Rtr1_<br>WT_3 | %SC<br>TAP_Rtr1_<br>WT_4 | UP<br>TAP_Rtr1_<br>WT_4 | # PSM<br>TAP_Rtr1_<br>WT_4 | %SC<br>TAP_Rtr1_<br>ctk1_del<br>etion | UP<br>TAP_Rtr1_<br>ctk1_del<br>etion | # PSM<br>TAP_Rtr1_<br>ctk1_del<br>etion |
|-----------|---------|----------------------------|--------------------------|-------------------------|----------------------------|--------------------------|-------------------------|----------------------------|--------------------------|-------------------------|----------------------------|---------------------------------------|--------------------------------------|-----------------------------------------|
| 398365005 | RIX1    | 0                          | 0                        | 0                       | 0                          | 3.01                     | 2                       | 5                          | 0                        | 0                       | 0                          | 4.59                                  | 1                                    | 1                                       |
| 6323975   | YMR315  | 1                          | 0                        | 0                       | 0                          | 4.01                     | 1                       | 4                          | 0                        | 0                       | 0                          | 0                                     | 0                                    | 0                                       |
| 6323740   | UTP15   | 0                          | 0                        | 0                       | 0                          | 3.70                     | 1                       | 2                          | 0                        | 0                       | 0                          | 0                                     | 0                                    | 0                                       |
| 6322743   | AAT1    | 0                          | 0                        | 0                       | 0                          | 2.22                     | 1                       | 2                          | 0                        | 0                       | 0                          | 0                                     | 0                                    | 0                                       |
| 6323033   | SSL1    | 0                          | 0                        | 0                       | 0                          | 3.90                     | 1                       | 2                          | 0                        | 0                       | 0                          | 0                                     | 0                                    | 0                                       |
| 398365521 | SWT1    | 0                          | 0                        | 0                       | 0                          | 2.84                     | 1                       | 2                          | 0                        | 0                       | 0                          | 0                                     | 0                                    | 0                                       |
| 398365403 | NUP133  | 0                          | 0                        | 0                       | 0                          | 1.12                     | 1                       | 1                          | 0                        | 0                       | 0                          | 0                                     | 0                                    | 0                                       |
| 6319276   | CDC24   | 0                          | 0                        | 0                       | 0                          | 1.76                     | 1                       | 1                          | 0                        | 0                       | 0                          | 0                                     | 0                                    | 0                                       |
| 6323251   | UTP13   | 0                          | 0                        | 0                       | 0                          | 2.45                     | 1                       | 2                          | 0                        | 0                       | 0                          | 0                                     | 0                                    | 0                                       |
| 6321913   | LSM12   | 7                          | 16.04                    | 2                       | 7                          | 25.13                    | 3                       | 20                         | 0                        | 0                       | 0                          | 0                                     | 0                                    | 0                                       |
| 6322257   | RCY1    | 0                          | 0                        | 0                       | 0                          | 7.14                     | 3                       | 5                          | 0                        | 0                       | 0                          | 0                                     | 0                                    | 0                                       |
| 6319900   | RSC6    | 0                          | 0                        | 0                       | 0                          | 8.90                     | 3                       | 5                          | 0                        | 0                       | 0                          | 0                                     | 0                                    | 0                                       |
| 398364743 | IRC2    | 0                          | 0                        | 0                       | 0                          | 15.97                    | 3                       | 4                          | 0                        | 0                       | 0                          | 0                                     | 0                                    | 0                                       |
| 6320070   | CDC53   | 2                          | 0                        | 0                       | 0                          | 5.40                     | 3                       | 5                          | 0                        | 0                       | 0                          | 0                                     | 0                                    | 0                                       |
| 398364601 | NFU1    | 0                          | 0                        | 0                       | 0                          | 0                        | 0                       | 0                          | 0                        | 0                       | 0                          | 0                                     | 0                                    | 0                                       |
| 6323229   | YKE2    | 1                          | 0                        | 0                       | 0                          | 0                        | 0                       | 0                          | 0                        | 0                       | 0                          | 0                                     | 0                                    | 0                                       |
| 6322154   | CKA1    | 0                          | 0                        | 0                       | 0                          | 0                        | 0                       | 0                          | 0                        | 0                       | 0                          | 0                                     | 0                                    | 0                                       |
| 6323687   | IOC4    | 0                          | 0                        | 0                       | 0                          | 0                        | 0                       | 0                          | 0                        | 0                       | 0                          | 0                                     | 0                                    | 0                                       |
| 6325372   | RGC1    | 0                          | 0                        | 0                       | 0                          | 0                        | 0                       | 0                          | 0                        | 0                       | 0                          | 0                                     | 0                                    | 0                                       |
| 6325234   | MET12   | 0                          | 0                        | 0                       | 0                          | 0                        | 0                       | 0                          | 0                        | 0                       | 0                          | 0                                     | 0                                    | 0                                       |
| 10383790  | RHB1    | 0                          | 0                        | 0                       | 0                          | 0                        | 0                       | 0                          | 0                        | 0                       | 0                          | 0                                     | 0                                    | 0                                       |
| 10383792  | SYP1    | 8                          | 0                        | 0                       | 0                          | 14.94                    | 7                       | 14                         | 1.72                     | 1                       | 1                          | 0                                     | 0                                    | 0                                       |
| 398365079 | SEC9    | 0                          | 0                        | 0                       | 0                          | 2.46                     | 1                       | 1                          | 0                        | 0                       | 0                          | 0                                     | 0                                    | 0                                       |
| 398365907 | APM3    | 0                          | 0                        | 0                       | 0                          | 6.00                     | 2                       | 7                          | 0                        | 0                       | 0                          | 0                                     | 0                                    | 0                                       |
| 6322783   | YNK1    | 0                          | 0                        | 0                       | 0                          | 18.95                    | 2                       | 3                          | 0                        | 0                       | 0                          | 0                                     | 0                                    | 0                                       |
| 6324470   | TPT1    | 0                          | 0                        | 0                       | 0                          | 22.17                    | 2                       | 10                         | 0                        | 0                       | 0                          | 0                                     | 0                                    | 0                                       |
| 6321843   | CIC1    | 0                          | 0                        | 0                       | 0                          | 12.77                    | 3                       | 11                         | 0                        | 0                       | 0                          | 0                                     | 0                                    | 0                                       |
| 6319298   | CCR4    | 0                          | 0                        | 0                       | 0                          | 9.44                     | 6                       | 17                         | 0                        | 0                       | 0                          | 0                                     | 0                                    | 0                                       |
| 6321257   | GTS1    | 0                          | 0                        | 0                       | 0                          | 0                        | 0                       | 0                          | 0                        | 0                       | 0                          | 0                                     | 0                                    | 0                                       |
| 6321341   | SRM1    | 0                          | 0                        | 0                       | 0                          | 0                        | 0                       | 0                          | 0                        | 0                       | 0                          | 0                                     | 0                                    | 0                                       |
| 398365245 | PFY1    | 0                          | 0                        | 0                       | 0                          | 0                        | 0                       | 0                          | 0                        | 0                       | 0                          | 0                                     | 0                                    | 0                                       |
| 6324375   | FPK1    | 0                          | 0                        | 0                       | 0                          | 0                        | 0                       | 0                          | 0                        | 0                       | 0                          | 0                                     | 0                                    | 0                                       |
| 398364253 | AYR1    | 0                          | 0                        | 0                       | 0                          | 0                        | 0                       | 0                          | 0                        | 0                       | 0                          | 0                                     | 0                                    | 0                                       |
| 398365397 | YGR054W | 0                          | 0                        | 0                       | 0                          | 0                        | 0                       | 0                          | 0                        | 0                       | 0                          | 0                                     | 0                                    | 0                                       |
| 398365527 | RLP7    | 0                          | 0                        | 0                       | 0                          | 10.56                    | 2                       | 8                          | 0                        | 0                       | 0                          | 0                                     | 0                                    | 0                                       |
| 6319976   | SHS1    | 0                          | 0                        | 0                       | 0                          | 8.53                     | 3                       | 11                         | 0                        | 0                       | 0                          | 0                                     | 0                                    | 0                                       |
| 398364769 | RSP5    | 0                          | 0                        | 0                       | 0                          | 8.78                     | 5                       | 8                          | 0                        | 0                       | 0                          | 0                                     | 0                                    | 0                                       |



Table S1 - Smith-Kinnaman, *et al* (2014) Abbreviations: %SC = percent sequence coverage, UP = unique peptides, PSM = peptide spectrum matches

| Accession | Acronym   | # PSM<br>TAP_Rtr1_<br>WT_1 | %SC<br>TAP_Rtr1_<br>WT_2 | UP<br>TAP_Rtr1_<br>WT_2 | # PSM<br>TAP_Rtr1_<br>WT_2 | %SC<br>TAP_Rtr1_<br>WT_3 | UP<br>TAP_Rtr1_<br>WT_3 | # PSM<br>TAP_Rtr1_<br>WT_3 | %SC<br>TAP_Rtr1_<br>WT_4 | UP<br>TAP_Rtr1_<br>WT_4 | # PSM<br>TAP_Rtr1_<br>WT_4 | %SC<br>TAP_Rtr1_<br>ctk1_del<br>etion | UP<br>TAP_Rtr1_<br>ctk1_del<br>etion | # PSM<br>TAP_Rtr1_<br>ctk1_del<br>etion |
|-----------|-----------|----------------------------|--------------------------|-------------------------|----------------------------|--------------------------|-------------------------|----------------------------|--------------------------|-------------------------|----------------------------|---------------------------------------|--------------------------------------|-----------------------------------------|
| 6320843   | PAC2      | 0                          | 0                        | 0                       | 0                          | 0                        | 0                       | 0                          | 0                        | 0                       | 0                          | 0                                     | 0                                    | 0                                       |
| 398365529 | SIR1      | 0                          | 0                        | 0                       | 0                          | 0                        | 0                       | 0                          | 0                        | 0                       | 0                          | 0                                     | 0                                    | 0                                       |
| 14318435  | TIP20     | 0                          | 0                        | 0                       | 0                          | 0                        | 0                       | 0                          | 0                        | 0                       | 0                          | 0                                     | 0                                    | 0                                       |
| 6323645   | AIM34     | 0                          | 0                        | 0                       | 0                          | 0                        | 0                       | 0                          | 0                        | 0                       | 0                          | 0                                     | 0                                    | 0                                       |
| 330443386 | BUD14     | 0                          | 0                        | 0                       | 0                          | 0                        | 0                       | 0                          | 0                        | 0                       | 0                          | 0                                     | 0                                    | 0                                       |
| 6319751   | CHK1      | 0                          | 0                        | 0                       | 0                          | 0                        | 0                       | 0                          | 0                        | 0                       | 0                          | 0                                     | 0                                    | 0                                       |
| 6319452   | APN2      | 0                          | 0                        | 0                       | 0                          | 0                        | 0                       | 0                          | 0                        | 0                       | 0                          | 0                                     | 0                                    | 0                                       |
| 10383783  | YCR015C   | 0                          | 0                        | 0                       | 0                          | 0                        | 0                       | 0                          | 0                        | 0                       | 0                          | 0                                     | 0                                    | 0                                       |
| 33438820  | YJL133C-A | 0                          | 0                        | 0                       | 0                          | 0                        | 0                       | 0                          | 0                        | 0                       | 0                          | 0                                     | 0                                    | 0                                       |
| 398365435 | ERG25     | 0                          | 0                        | 0                       | 0                          | 0                        | 0                       | 0                          | 0                        | 0                       | 0                          | 0                                     | 0                                    | 0                                       |
| 6321363   | MPS2      | 0                          | 0                        | 0                       | 0                          | 0                        | 0                       | 0                          | 0                        | 0                       | 0                          | 0                                     | 0                                    | 0                                       |
| 6323180   | PCD1      | 0                          | 0                        | 0                       | 0                          | 0                        | 0                       | 0                          | 0                        | 0                       | 0                          | 0                                     | 0                                    | 0                                       |
| 398364799 | PMD1      | 0                          | 0                        | 0                       | 0                          | 0                        | 0                       | 0                          | 0                        | 0                       | 0                          | 0                                     | 0                                    | 0                                       |
| 6322709   | TGL1      | 0                          | 0                        | 0                       | 0                          | 0                        | 0                       | 0                          | 0                        | 0                       | 0                          | 0                                     | 0                                    | 0                                       |
| 6325305   | TAH18     | 0                          | 0                        | 0                       | 0                          | 0                        | 0                       | 0                          | 0                        | 0                       | 0                          | 0                                     | 0                                    | 0                                       |
| 6322698   | YKL151C   | 0                          | 0                        | 0                       | 0                          | 0                        | 0                       | 0                          | 0                        | 0                       | 0                          | 0                                     | 0                                    | 0                                       |
| 6322341   | RPE1      | 0                          | 0                        | 0                       | 0                          | 0                        | 0                       | 0                          | 0                        | 0                       | 0                          | 0                                     | 0                                    | 0                                       |
| 6323336   | STT4      | 0                          | 0                        | 0                       | 0                          | 0                        | 0                       | 0                          | 0                        | 0                       | 0                          | 0                                     | 0                                    | 0                                       |
| 6320542   | MSN5      | 0                          | 0                        | 0                       | 0                          | 0                        | 0                       | 0                          | 0                        | 0                       | 0                          | 0                                     | 0                                    | 0                                       |
| 6325171   | ELP3      | 0                          | 0                        | 0                       | 0                          | 0                        | 0                       | 0                          | 0                        | 0                       | 0                          | 0                                     | 0                                    | 0                                       |
| 6319274   | ERV46     | 0                          | 0                        | 0                       | 0                          | 0                        | 0                       | 0                          | 0                        | 0                       | 0                          | 0                                     | 0                                    | 0                                       |
| 398366207 | CRM1      | 0                          | 0                        | 0                       | 0                          | 9.13                     | 7                       | 18                         | 0                        | 0                       | 0                          | 0                                     | 0                                    | 0                                       |
| 6321198   | CSE1      | 0                          | 0                        | 0                       | 0                          | 3.54                     | 3                       | 5                          | 0                        | 0                       | 0                          | 0                                     | 0                                    | 0                                       |
| 398366491 | SKP1      | 0                          | 0                        | 0                       | 0                          | 8.76                     | 1                       | 5                          | 0                        | 0                       | 0                          | 0                                     | 0                                    | 0                                       |
| 6323819   | MLH1      | 0                          | 0                        | 0                       | 0                          | 2.21                     | 1                       | 1                          | 0                        | 0                       | 0                          | 0                                     | 0                                    | 0                                       |
| 398365033 | IRA1      | 0                          | 0                        | 0                       | 0                          | 0                        | 0                       | 0                          | 0                        | 0                       | 0                          | 0                                     | 0                                    | 0                                       |
| 398366427 | SRP101    | 0                          | 0                        | 0                       | 0                          | 0                        | 0                       | 0                          | 0                        | 0                       | 0                          | 0                                     | 0                                    | 0                                       |
| 6320008   | NUS1      | 0                          | 0                        | 0                       | 0                          | 0                        | 0                       | 0                          | 0                        | 0                       | 0                          | 0                                     | 0                                    | 0                                       |
| 6324098   | PDR16     | 0                          | 0                        | 0                       | 0                          | 33.33                    | 9                       | 35                         | 3.42                     | 1                       | 1                          | 0                                     | 0                                    | 0                                       |
| 6324093   | SIN4      | 0                          | 0                        | 0                       | 0                          | 7.29                     | 4                       | 11                         | 0                        | 0                       | 0                          | 0                                     | 0                                    | 0                                       |
| 6322063   | MET18     | 0                          | 0                        | 0                       | 0                          | 8.53                     | 6                       | 17                         | 0                        | 0                       | 0                          | 0                                     | 0                                    | 0                                       |
| 6319901   | THR4      | 0                          | 0                        | 0                       | 0                          | 0                        | 0                       | 0                          | 0                        | 0                       | 0                          | 0                                     | 0                                    | 0                                       |
| 6321899   | CDC12     | 0                          | 0                        | 0                       | 0                          | 0                        | 0                       | 0                          | 0                        | 0                       | 0                          | 0                                     | 0                                    | 0                                       |
| 398364305 | YND1      | 0                          | 0                        | 0                       | 0                          | 0                        | 0                       | 0                          | 0                        | 0                       | 0                          | 0                                     | 0                                    | 0                                       |
| 6325365   | RPN7      | 2                          | 0                        | 0                       | 0                          | 16.32                    | 6                       | 13                         | 2.10                     | 1                       | 1                          | 2.10                                  | 1                                    | 3                                       |
| 6322288   | RFA3      | 0                          | 0                        | 0                       | 0                          | 27.05                    | 2                       | 12                         | 0                        | 0                       | 0                          | 0                                     | 0                                    | 0                                       |
| 6323832   | YMR178    | 0                          | 0                        | 0                       | 0                          | 6.20                     | 1                       | 1                          | 0                        | 0                       | 0                          | 0                                     | 0                                    | 0                                       |

Table S1 - Smith-Kinnaman, *et al* (2014) Abbreviations: %SC = percent sequence coverage, UP = unique peptides, PSM = peptide spectrum matches

| Accession | Acronym | # PSM<br>TAP_Rtr1_<br>WT_1 | %SC<br>TAP_Rtr1_<br>WT_2 | UP<br>TAP_Rtr1_<br>WT_2 | # PSM<br>TAP_Rtr1_<br>WT_2 | %SC<br>TAP_Rtr1_<br>WT_3 | UP<br>TAP_Rtr1_<br>WT_3 | # PSM<br>TAP_Rtr1_<br>WT_3 | %SC<br>TAP_Rtr1_<br>WT_4 | UP<br>TAP_Rtr1_<br>WT_4 | # PSM<br>TAP_Rtr1_<br>WT_4 | %SC<br>TAP_Rtr1_<br>ctk1_del<br>etion | UP<br>TAP_Rtr1_<br>ctk1_del<br>etion | # PSM<br>TAP_Rtr1_<br>ctk1_del<br>etion |
|-----------|---------|----------------------------|--------------------------|-------------------------|----------------------------|--------------------------|-------------------------|----------------------------|--------------------------|-------------------------|----------------------------|---------------------------------------|--------------------------------------|-----------------------------------------|
| 6321327   | NSA1    | 0                          | 0                        | 0                       | 0                          | 2.59                     | 1                       | 1                          | 0                        | 0                       | 0                          | 0                                     | 0                                    | 0                                       |
| 398366645 | PKH1    | 0                          | 0                        | 0                       | 0                          | 1.17                     | 1                       | 1                          | 0                        | 0                       | 0                          | 0                                     | 0                                    | 0                                       |
| 6323507   | MSC1    | 0                          | 0                        | 0                       | 0                          | 0                        | 0                       | 0                          | 0                        | 0                       | 0                          | 0                                     | 0                                    | 0                                       |
| 398366107 | YPP1    | 0                          | 0                        | 0                       | 0                          | 0                        | 0                       | 0                          | 0                        | 0                       | 0                          | 0                                     | 0                                    | 0                                       |
| 6323586   | SPC2    | 0                          | 0                        | 0                       | 0                          | 0                        | 0                       | 0                          | 0                        | 0                       | 0                          | 0                                     | 0                                    | 0                                       |
| 6324079   | RAD50   | 0                          | 0                        | 0                       | 0                          | 0                        | 0                       | 0                          | 0                        | 0                       | 0                          | 0                                     | 0                                    | 0                                       |
| 6320865   | GAL83   | 0                          | 0                        | 0                       | 0                          | 0                        | 0                       | 0                          | 0                        | 0                       | 0                          | 0                                     | 0                                    | 0                                       |
| 14318465  | YFL054C | 0                          | 0                        | 0                       | 0                          | 0                        | 0                       | 0                          | 0                        | 0                       | 0                          | 0                                     | 0                                    | 0                                       |
| 6325349   | NVJ2    | 0                          | 0                        | 0                       | 0                          | 0                        | 0                       | 0                          | 0                        | 0                       | 0                          | 0                                     | 0                                    | 0                                       |
| 6323962   | UBP15   | 0                          | 0                        | 0                       | 0                          | 0                        | 0                       | 0                          | 0                        | 0                       | 0                          | 0                                     | 0                                    | 0                                       |
| 6323891   | RNA1    | 0                          | 0                        | 0                       | 0                          | 35.63                    | 11                      | 35                         | 0                        | 0                       | 0                          | 0                                     | 0                                    | 0                                       |
| 6323273   | MAP1    | 0                          | 0                        | 0                       | 0                          | 0                        | 0                       | 0                          | 0                        | 0                       | 0                          | 0                                     | 0                                    | 0                                       |
| 6320935   | TRP2    | 2                          | 0                        | 0                       | 0                          | 31.56                    | 11                      | 25                         | 0                        | 0                       | 0                          | 0                                     | 0                                    | 0                                       |
| 6324994   | YPL260W | 0                          | 0                        | 0                       | 0                          | 2.36                     | 1                       | 9                          | 0                        | 0                       | 0                          | 0                                     | 0                                    | 0                                       |
| 27469358  | PMT2    | 0                          | 0                        | 0                       | 0                          | 0                        | 0                       | 0                          | 0                        | 0                       | 0                          | 0                                     | 0                                    | 0                                       |
| 398365969 | CDC31   | 0                          | 0                        | 0                       | 0                          | 31.68                    | 4                       | 14                         | 0                        | 0                       | 0                          | 0                                     | 0                                    | 0                                       |
| 6320214   | SNQ2    | 0                          | 0                        | 0                       | 0                          | 0                        | 0                       | 0                          | 0                        | 0                       | 0                          | 0                                     | 0                                    | 0                                       |
| 6322263   | PHO90   | 0                          | 0                        | 0                       | 0                          | 0                        | 0                       | 0                          | 0                        | 0                       | 0                          | 0                                     | 0                                    | 0                                       |
| 42742305  | YNL208W | 2                          | 0                        | 0                       | 0                          | 28.64                    | 3                       | 37                         | 0                        | 0                       | 0                          | 0                                     | 0                                    | 0                                       |
| 6321432   | PMC1    | 0                          | 0                        | 0                       | 0                          | 0                        | 0                       | 0                          | 0                        | 0                       | 0                          | 0                                     | 0                                    | 0                                       |
| 6323221   | HCR1    | 0                          | 0                        | 0                       | 0                          | 0                        | 0                       | 0                          | 4.15                     | 1                       | 2                          | 0                                     | 0                                    | 0                                       |
| 6322722   | PGM1    | 0                          | 0                        | 0                       | 0                          | 0                        | 0                       | 0                          | 0                        | 0                       | 0                          | 0                                     | 0                                    | 0                                       |
| 6323089   | FRS1    | 0                          | 0                        | 0                       | 0                          | 2.18                     | 1                       | 7                          | 0                        | 0                       | 0                          | 0                                     | 0                                    | 0                                       |
| 6321271   | PMR1    | 0                          | 0                        | 0                       | 0                          | 0                        | 0                       | 0                          | 0                        | 0                       | 0                          | 0                                     | 0                                    | 0                                       |
| 6322097   | LYS12   | 22                         | 0                        | 0                       | 0                          | 43.94                    | 15                      | 68                         | 0                        | 0                       | 0                          | 0                                     | 0                                    | 0                                       |
| 6320151   | SLC1    | 1                          | 0                        | 0                       | 0                          | 0                        | 0                       | 0                          | 0                        | 0                       | 0                          | 0                                     | 0                                    | 0                                       |
| 6319312   | ERP2    | 0                          | 0                        | 0                       | 0                          | 0                        | 0                       | 0                          | 0                        | 0                       | 0                          | 0                                     | 0                                    | 0                                       |
| 398365779 | YCF1    | 0                          | 0                        | 0                       | 0                          | 0                        | 0                       | 0                          | 0                        | 0                       | 0                          | 0                                     | 0                                    | 0                                       |
| 6324082   | YNL247W | 0                          | 0                        | 0                       | 0                          | 0                        | 0                       | 0                          | 0                        | 0                       | 0                          | 0                                     | 0                                    | 0                                       |
| 6324625   | ETT1    | 0                          | 0                        | 0                       | 0                          | 21.60                    | 6                       | 41                         | 0                        | 0                       | 0                          | 0                                     | 0                                    | 0                                       |
| 6321492   | MUP1    | 0                          | 0                        | 0                       | 0                          | 0                        | 0                       | 0                          | 0                        | 0                       | 0                          | 0                                     | 0                                    | 0                                       |
| 6322434   | RNR2    | 0                          | 0                        | 0                       | 0                          | 6.77                     | 2                       | 9                          | 0                        | 0                       | 0                          | 0                                     | 0                                    | 0                                       |
| 6320245   | ENA1    | 0                          | 0                        | 0                       | 0                          | 0                        | 0                       | 0                          | 0                        | 0                       | 0                          | 0                                     | 0                                    | 0                                       |
| 6323853   | VTI1    | 0                          | 0                        | 0                       | 0                          | 0                        | 0                       | 0                          | 0                        | 0                       | 0                          | 0                                     | 0                                    | 0                                       |
| 6319837   | ILV6    | 0                          | 0                        | 0                       | 0                          | 21.68                    | 4                       | 12                         | 0                        | 0                       | 0                          | 0                                     | 0                                    | 0                                       |
| 6319441   | PET9    | 7                          | 3.14                     | 1                       | 1                          | 7.55                     | 2                       | 2                          | 0                        | 0                       | 0                          | 0                                     | 0                                    | 0                                       |
| 398365855 | KGD2    | 29                         | 0                        | 0                       | 0                          | 1.94                     | 1                       | 1                          | 0                        | 0                       | 0                          | 3.46                                  | 1                                    | 2                                       |



Table S1 - Smith-Kinnaman, *et al* (2014) Abbreviations: %SC = percent sequence coverage, UP = unique peptides, PSM = peptide spectrum matches

| Accession | Acronym | # PSM<br>TAP_Rtr1_<br>WT_1 | %SC<br>TAP_Rtr1_<br>WT_2 | UP<br>TAP_Rtr1_<br>WT_2 | # PSM<br>TAP_Rtr1_<br>WT_2 | %SC<br>TAP_Rtr1_<br>WT_3 | UP<br>TAP_Rtr1_<br>WT_3 | # PSM<br>TAP_Rtr1_<br>WT_3 | %SC<br>TAP_Rtr1_<br>WT_4 | UP<br>TAP_Rtr1_<br>WT_4 | # PSM<br>TAP_Rtr1_<br>WT_4 | %SC<br>TAP_Rtr1_<br>ctk1_del<br>etion | UP<br>TAP_Rtr1_<br>ctk1_del<br>etion | # PSM<br>TAP_Rtr1_<br>ctk1_del<br>etion |
|-----------|---------|----------------------------|--------------------------|-------------------------|----------------------------|--------------------------|-------------------------|----------------------------|--------------------------|-------------------------|----------------------------|---------------------------------------|--------------------------------------|-----------------------------------------|
| 6322980   | YBT1    | 0                          | 0                        | 0                       | 0                          | 0                        | 0                       | 0                          | 0                        | 0                       | 0                          | 0                                     | 0                                    | 0                                       |
| 6320717   | GNP1    | 0                          | 0                        | 0                       | 0                          | 0                        | 0                       | 0                          | 0                        | 0                       | 0                          | 0                                     | 0                                    | 0                                       |
| 398365985 | RPN8    | 0                          | 0                        | 0                       | 0                          | 26.63                    | 6                       | 36                         | 0                        | 0                       | 0                          | 0                                     | 0                                    | 0                                       |
| 398364411 | MMF1    | 3                          | 0                        | 0                       | 0                          | 9.66                     | 1                       | 2                          | 0                        | 0                       | 0                          | 0                                     | 0                                    | 0                                       |
| 398366385 | RNH202  | 0                          | 0                        | 0                       | 0                          | 0                        | 0                       | 0                          | 0                        | 0                       | 0                          | 0                                     | 0                                    | 0                                       |
| 6320332   | ARO1    | 2                          | 0                        | 0                       | 0                          | 11.52                    | 13                      | 39                         | 0                        | 0                       | 0                          | 0                                     | 0                                    | 0                                       |
| 330443439 | ECM33   | 14                         | 0                        | 0                       | 0                          | 0                        | 0                       | 0                          | 0                        | 0                       | 0                          | 0                                     | 0                                    | 0                                       |
| 6322640   | STE6    | 0                          | 0                        | 0                       | 0                          | 0                        | 0                       | 0                          | 0                        | 0                       | 0                          | 0                                     | 0                                    | 0                                       |
| 398365037 | DNF1    | 0                          | 0                        | 0                       | 0                          | 0                        | 0                       | 0                          | 0                        | 0                       | 0                          | 0                                     | 0                                    | 0                                       |
| 398366015 | VPH1    | 0                          | 0                        | 0                       | 0                          | 1.79                     | 1                       | 1                          | 0                        | 0                       | 0                          | 0                                     | 0                                    | 0                                       |
| 398364221 | SIT1    | 0                          | 0                        | 0                       | 0                          | 0                        | 0                       | 0                          | 0                        | 0                       | 0                          | 0                                     | 0                                    | 0                                       |
| 6323965   | FKS3    | 0                          | 0                        | 0                       | 0                          | 0                        | 0                       | 0                          | 0.56                     | 1                       | 1                          | 0                                     | 0                                    | 0                                       |
| 6321346   | NUP145  | 0                          | 0                        | 0                       | 0                          | 0                        | 0                       | 0                          | 0.68                     | 1                       | 1                          | 0                                     | 0                                    | 0                                       |
| 6324067   | POL2    | 0                          | 0                        | 0                       | 0                          | 0.54                     | 1                       | 1                          | 0                        | 0                       | 0                          | 0                                     | 0                                    | 0                                       |
| 6325441   | DPM1    | 0                          | 0                        | 0                       | 0                          | 4.87                     | 1                       | 1                          | 0                        | 0                       | 0                          | 0                                     | 0                                    | 0                                       |
| 6320150   | PBP4    | 8                          | 12.43                    | 1                       | 1                          | 20.00                    | 2                       | 5                          | 0                        | 0                       | 0                          | 0                                     | 0                                    | 0                                       |
| 6319704   | MCX1    | 0                          | 0                        | 0                       | 0                          | 7.31                     | 3                       | 5                          | 0                        | 0                       | 0                          | 0                                     | 0                                    | 0                                       |
| 6323235   | ENT2    | 0                          | 0                        | 0                       | 0                          | 0                        | 0                       | 0                          | 0                        | 0                       | 0                          | 0                                     | 0                                    | 0                                       |
| 398365451 | PXL1    | 0                          | 0                        | 0                       | 0                          | 0                        | 0                       | 0                          | 0                        | 0                       | 0                          | 0                                     | 0                                    | 0                                       |
| 37362705  | YPR089W | 0                          | 0                        | 0                       | 0                          | 5.63                     | 4                       | 5                          | 0                        | 0                       | 0                          | 0                                     | 0                                    | 0                                       |
| 116006501 | MGM1    | 0                          | 0                        | 0                       | 0                          | 0                        | 0                       | 0                          | 0                        | 0                       | 0                          | 0                                     | 0                                    | 0                                       |
| 6324111   | MGS1    | 0                          | 0                        | 0                       | 0                          | 2.21                     | 1                       | 1                          | 0                        | 0                       | 0                          | 0                                     | 0                                    | 0                                       |
| 6321880   | RPF1    | 0                          | 0                        | 0                       | 0                          | 0                        | 0                       | 0                          | 0                        | 0                       | 0                          | 0                                     | 0                                    | 0                                       |
| 6325407   | NCE102  | 0                          | 0                        | 0                       | 0                          | 0                        | 0                       | 0                          | 0                        | 0                       | 0                          | 0                                     | 0                                    | 0                                       |
| 398366221 | YML7    | 0                          | 0                        | 0                       | 0                          | 0                        | 0                       | 0                          | 0                        | 0                       | 0                          | 0                                     | 0                                    | 0                                       |
| 398364731 | MPP10   | 0                          | 0                        | 0                       | 0                          | 3.04                     | 1                       | 2                          | 0                        | 0                       | 0                          | 0                                     | 0                                    | 0                                       |
| 6319449   | PIM1    | 0                          | 0                        | 0                       | 0                          | 12.71                    | 9                       | 27                         | 0                        | 0                       | 0                          | 0                                     | 0                                    | 0                                       |
| 6319448   | MCM2    | 0                          | 0                        | 0                       | 0                          | 7.95                     | 5                       | 9                          | 0                        | 0                       | 0                          | 1.73                                  | 1                                    | 1                                       |
| 6321851   | VMA22   | 0                          | 0                        | 0                       | 0                          | 9.39                     | 1                       | 1                          | 0                        | 0                       | 0                          | 0                                     | 0                                    | 0                                       |
| 398365621 | YJR149W | 0                          | 0                        | 0                       | 0                          | 0                        | 0                       | 0                          | 0                        | 0                       | 0                          | 0                                     | 0                                    | 0                                       |
| 6319646   | SSE2    | 13                         | 0                        | 0                       | 0                          | 3.75                     | 2                       | 4                          | 0                        | 0                       | 0                          | 0                                     | 0                                    | 0                                       |
| 6321332   | MLC1    | 2                          | 14.77                    | 1                       | 1                          | 44.97                    | 5                       | 57                         | 0                        | 0                       | 0                          | 0                                     | 0                                    | 0                                       |
| 398365795 | YGR126W | 0                          | 0                        | 0                       | 0                          | 3.04                     | 1                       | 4                          | 0                        | 0                       | 0                          | 0                                     | 0                                    | 0                                       |
| 6324350   | SNF12   | 0                          | 0                        | 0                       | 0                          | 29.86                    | 11                      | 27                         | 0                        | 0                       | 0                          | 2.47                                  | 1                                    | 1                                       |
| 398366497 | RQC1    | 0                          | 0                        | 0                       | 0                          | 0                        | 0                       | 0                          | 1.24                     | 1                       | 1                          | 0                                     | 0                                    | 0                                       |
| 6322676   | EBP2    | 0                          | 0                        | 0                       | 0                          | 3.75                     | 1                       | 2                          | 0                        | 0                       | 0                          | 0                                     | 0                                    | 0                                       |
| 6323944   | HSH155  | 0                          | 0                        | 0                       | 0                          | 1.75                     | 1                       | 3                          | 0                        | 0                       | 0                          | 0                                     | 0                                    | 0                                       |







Table S1 - Smith-Kinnaman, *et al* (2014) Abbreviations: %SC = percent sequence coverage, UP = unique peptides, PSM = peptide spectrum matches

| Accession | Acronym  | # PSM<br>TAP_Rtr1_<br>WT_1 | %SC<br>TAP_Rtr1_<br>WT_2 | UP<br>TAP_Rtr1_<br>WT_2 | # PSM<br>TAP_Rtr1_<br>WT_2 | %SC<br>TAP_Rtr1_<br>WT_3 | UP<br>TAP_Rtr1_<br>WT_3 | # PSM<br>TAP_Rtr1_<br>WT_3 | %SC<br>TAP_Rtr1_<br>WT_4 | UP<br>TAP_Rtr1_<br>WT_4 | # PSM<br>TAP_Rtr1_<br>WT_4 | %SC<br>TAP_Rtr1_<br>ctk1_del<br>etion | UP<br>TAP_Rtr1_<br>ctk1_del<br>etion | # PSM<br>TAP_Rtr1_<br>ctk1_del<br>etion |
|-----------|----------|----------------------------|--------------------------|-------------------------|----------------------------|--------------------------|-------------------------|----------------------------|--------------------------|-------------------------|----------------------------|---------------------------------------|--------------------------------------|-----------------------------------------|
| 6322531   | LIA1     | 0                          | 0                        | 0                       | 0                          | 0                        | 0                       | 0                          | 0                        | 0                       | 0                          | 0                                     | 0                                    | 0                                       |
| 398364353 | PRO3     | 0                          | 0                        | 0                       | 0                          | 10.14                    | 2                       | 4                          | 0                        | 0                       | 0                          | 0                                     | 0                                    | 0                                       |
| 6322645   | EAP1     | 1                          | 0                        | 0                       | 0                          | 0                        | 0                       | 0                          | 1.74                     | 1                       | 1                          | 1                                     | 0                                    | 0                                       |
| 6323237   | SEC13    | 0                          | 0                        | 0                       | 0                          | 0                        | 0                       | 0                          | 0                        | 0                       | 0                          | 0                                     | 0                                    | 0                                       |
| 398365809 | RUD3     | 0                          | 0                        | 0                       | 0                          | 0                        | 0                       | 0                          | 0                        | 0                       | 0                          | 0                                     | 0                                    | 0                                       |
| 6319930   | YCR087C- | 0                          | 0                        | 0                       | 0                          | 0                        | 0                       | 0                          | 7.19                     | 1                       | 1                          | 1                                     | 0                                    | 0                                       |
| 398366045 | CSR1     | 2                          | 0                        | 0                       | 0                          | 28.92                    | 9                       | 25                         | 0                        | 0                       | 0                          | 0                                     | 0                                    | 0                                       |
| 6323938   | AEP2     | 0                          | 0                        | 0                       | 0                          | 0                        | 0                       | 0                          | 0                        | 0                       | 0                          | 0                                     | 0                                    | 0                                       |
| 6322167   | TIM44    | 23                         | 0                        | 0                       | 0                          | 35.03                    | 11                      | 60                         | 2.09                     | 1                       | 1                          | 0                                     | 0                                    | 0                                       |
| 6320000   | TRM8     | 0                          | 0                        | 0                       | 0                          | 0                        | 0                       | 0                          | 0                        | 0                       | 0                          | 0                                     | 0                                    | 0                                       |
| 6319321   | RFA1     | 0                          | 0                        | 0                       | 0                          | 0                        | 0                       | 0                          | 0                        | 0                       | 0                          | 1.93                                  | 1                                    | 1                                       |
| 6323934   | PGM3     | 0                          | 0                        | 0                       | 0                          | 0                        | 0                       | 0                          | 0                        | 0                       | 0                          | 1.13                                  | 1                                    | 2                                       |
| 6324629   | VHS3     | 0                          | 0                        | 0                       | 0                          | 0                        | 0                       | 0                          | 0                        | 0                       | 0                          | 2.37                                  | 1                                    | 1                                       |
| 398366511 | ATP22    | 4                          | 0                        | 0                       | 0                          | 2.49                     | 1                       | 1                          | 2.49                     | 1                       | 4                          | 2.49                                  | 1                                    | 4                                       |
| 6323706   | RNA14    | 0                          | 0                        | 0                       | 0                          | 0.89                     | 1                       | 1                          | 0.89                     | 1                       | 1                          | 0                                     | 0                                    | 0                                       |
| 6321395   | DST1     | 2                          | 0                        | 0                       | 0                          | 10.36                    | 2                       | 3                          | 9.71                     | 3                       | 3                          | 0                                     | 0                                    | 0                                       |
| 398364447 | CAP2     | 0                          | 0                        | 0                       | 0                          | 4.53                     | 1                       | 2                          | 0                        | 0                       | 0                          | 0                                     | 0                                    | 0                                       |
| 398365841 | RIF1     | 0                          | 0                        | 0                       | 0                          | 1.10                     | 1                       | 1                          | 0                        | 0                       | 0                          | 0                                     | 0                                    | 0                                       |
| 398365073 | RAD3     | 0                          | 0                        | 0                       | 0                          | 1.93                     | 1                       | 1                          | 0                        | 0                       | 0                          | 0                                     | 0                                    | 0                                       |
| 6319622   | MRPS9    | 0                          | 0                        | 0                       | 0                          | 3.60                     | 1                       | 1                          | 0                        | 0                       | 0                          | 0                                     | 0                                    | 0                                       |
| 6323895   | RNT1     | 0                          | 0                        | 0                       | 0                          | 4.03                     | 1                       | 2                          | 0                        | 0                       | 0                          | 0                                     | 0                                    | 0                                       |
| 6319317   | TFC3     | 0                          | 0                        | 0                       | 0                          | 1.29                     | 1                       | 1                          | 0                        | 0                       | 0                          | 0                                     | 0                                    | 0                                       |
| 6323216   | SKG3     | 0                          | 0                        | 0                       | 0                          | 1.46                     | 1                       | 2                          | 0                        | 0                       | 0                          | 0                                     | 0                                    | 0                                       |
| 6323341   | CDC25    | 0                          | 0                        | 0                       | 0                          | 0.94                     | 1                       | 2                          | 0                        | 0                       | 0                          | 0                                     | 0                                    | 0                                       |
| 6320087   | NUP84    | 0                          | 0                        | 0                       | 0                          | 2.34                     | 1                       | 2                          | 0                        | 0                       | 0                          | 0                                     | 0                                    | 0                                       |
| 6322188   | CFD1     | 0                          | 0                        | 0                       | 0                          | 5.12                     | 1                       | 2                          | 0                        | 0                       | 0                          | 0                                     | 0                                    | 0                                       |
| 6324424   | SPT20    | 0                          | 0                        | 0                       | 0                          | 2.65                     | 1                       | 2                          | 0                        | 0                       | 0                          | 0                                     | 0                                    | 0                                       |
| 6323034   | SSK1     | 0                          | 0                        | 0                       | 0                          | 1.97                     | 1                       | 2                          | 0                        | 0                       | 0                          | 0                                     | 0                                    | 0                                       |
| 398365691 | SRB5     | 0                          | 0                        | 0                       | 0                          | 5.86                     | 1                       | 1                          | 0                        | 0                       | 0                          | 0                                     | 0                                    | 0                                       |
| 398364427 | PIG2     | 0                          | 0                        | 0                       | 0                          | 2.60                     | 1                       | 1                          | 0                        | 0                       | 0                          | 0                                     | 0                                    | 0                                       |
| 398364977 | ALY1     | 0                          | 0                        | 0                       | 0                          | 1.53                     | 1                       | 1                          | 0                        | 0                       | 0                          | 0                                     | 0                                    | 0                                       |
| 6320315   | FOB1     | 0                          | 0                        | 0                       | 0                          | 3.36                     | 1                       | 1                          | 0                        | 0                       | 0                          | 0                                     | 0                                    | 0                                       |
| 6323621   | YML020W  | 0                          | 0                        | 0                       | 0                          | 3.77                     | 1                       | 1                          | 0                        | 0                       | 0                          | 0                                     | 0                                    | 0                                       |
| 14318535  | IOC3     | 0                          | 0                        | 0                       | 0                          | 1.91                     | 1                       | 1                          | 0                        | 0                       | 0                          | 0                                     | 0                                    | 0                                       |
| 10383754  | MRC1     | 0                          | 0                        | 0                       | 0                          | 1.92                     | 1                       | 1                          | 0                        | 0                       | 0                          | 0                                     | 0                                    | 0                                       |
| 6319988   | NOP6     | 0                          | 0                        | 0                       | 0                          | 4.89                     | 1                       | 1                          | 0                        | 0                       | 0                          | 0                                     | 0                                    | 0                                       |
| 6323394   | STE11    | 0                          | 0                        | 0                       | 0                          | 2.79                     | 1                       | 1                          | 0                        | 0                       | 0                          | 0                                     | 0                                    | 0                                       |

Table S1 - Smith-Kinnaman, *et al* (2014) Abbreviations: %SC = percent sequence coverage, UP = unique peptides, PSM = peptide spectrum matches

| Accession | Acronym | # PSM<br>TAP_Rtr1_<br>WT_1 | %SC<br>TAP_Rtr1_<br>WT_2 | UP<br>TAP_Rtr1_<br>WT_2 | # PSM<br>TAP_Rtr1_<br>WT_2 | %SC<br>TAP_Rtr1_<br>WT_3 | UP<br>TAP_Rtr1_<br>WT_3 | # PSM<br>TAP_Rtr1_<br>WT_3 | %SC<br>TAP_Rtr1_<br>WT_4 | UP<br>TAP_Rtr1_<br>WT_4 | # PSM<br>TAP_Rtr1_<br>WT_4 | %SC<br>TAP_Rtr1_<br>ctk1_del<br>etion | UP<br>TAP_Rtr1_<br>ctk1_del<br>etion | # PSM<br>TAP_Rtr1_<br>ctk1_del<br>etion |
|-----------|---------|----------------------------|--------------------------|-------------------------|----------------------------|--------------------------|-------------------------|----------------------------|--------------------------|-------------------------|----------------------------|---------------------------------------|--------------------------------------|-----------------------------------------|
| 330443700 | UBP10   | 0                          | 0                        | 0                       | 0                          | 2.02                     | 1                       | 1                          | 0                        | 0                       | 0                          | 0                                     | 0                                    | 0                                       |
| 330443395 | PKC1    | 0                          | 0                        | 0                       | 0                          | 0.96                     | 1                       | 1                          | 0                        | 0                       | 0                          | 0                                     | 0                                    | 0                                       |
| 6321782   | MRP4    | 0                          | 0                        | 0                       | 0                          | 2.79                     | 1                       | 1                          | 0                        | 0                       | 0                          | 0                                     | 0                                    | 0                                       |
| 6323846   | GYL1    | 0                          | 0                        | 0                       | 0                          | 1.39                     | 1                       | 2                          | 0                        | 0                       | 0                          | 0                                     | 0                                    | 0                                       |
| 398365475 | VPS41   | 0                          | 0                        | 0                       | 0                          | 1.11                     | 1                       | 1                          | 0                        | 0                       | 0                          | 0                                     | 0                                    | 0                                       |
| 6323526   | COQ5    | 0                          | 0                        | 0                       | 0                          | 10.10                    | 2                       | 2                          | 0                        | 0                       | 0                          | 0                                     | 0                                    | 0                                       |
| 6325226   | PHO85   | 0                          | 0                        | 0                       | 0                          | 5.57                     | 2                       | 3                          | 0                        | 0                       | 0                          | 0                                     | 0                                    | 0                                       |
| 398364611 | PUP3    | 0                          | 0                        | 0                       | 0                          | 16.59                    | 2                       | 13                         | 0                        | 0                       | 0                          | 0                                     | 0                                    | 0                                       |
| 6323915   | TRM732  | 0                          | 0                        | 0                       | 0                          | 1.83                     | 2                       | 6                          | 0                        | 0                       | 0                          | 0                                     | 0                                    | 0                                       |
| 6320438   | HEM1    | 0                          | 0                        | 0                       | 0                          | 5.29                     | 2                       | 6                          | 0                        | 0                       | 0                          | 0                                     | 0                                    | 0                                       |
| 6325102   | KIP2    | 0                          | 0                        | 0                       | 0                          | 4.25                     | 2                       | 4                          | 0                        | 0                       | 0                          | 0                                     | 0                                    | 0                                       |
| 6323575   | ORC1    | 0                          | 0                        | 0                       | 0                          | 2.52                     | 2                       | 3                          | 0                        | 0                       | 0                          | 0                                     | 0                                    | 0                                       |
| 398365487 | RRP8    | 0                          | 0                        | 0                       | 0                          | 8.93                     | 2                       | 2                          | 0                        | 0                       | 0                          | 0                                     | 0                                    | 0                                       |
| 6324338   | PRP2    | 0                          | 0                        | 0                       | 0                          | 2.40                     | 2                       | 2                          | 0                        | 0                       | 0                          | 0                                     | 0                                    | 0                                       |
| 6325104   | RAD53   | 0                          | 0                        | 0                       | 0                          | 3.90                     | 2                       | 2                          | 0                        | 0                       | 0                          | 0                                     | 0                                    | 0                                       |
| 6324107   | SSU72   | 0                          | 0                        | 0                       | 0                          | 20.87                    | 2                       | 2                          | 0                        | 0                       | 0                          | 0                                     | 0                                    | 0                                       |
| 6319526   | RFS1    | 0                          | 0                        | 0                       | 0                          | 15.71                    | 2                       | 3                          | 0                        | 0                       | 0                          | 0                                     | 0                                    | 0                                       |
| 6320952   | NUP157  | 0                          | 0                        | 0                       | 0                          | 2.30                     | 2                       | 2                          | 0                        | 0                       | 0                          | 0                                     | 0                                    | 0                                       |
| 6324147   | IPI3    | 0                          | 0                        | 0                       | 0                          | 8.83                     | 3                       | 6                          | 0                        | 0                       | 0                          | 0                                     | 0                                    | 0                                       |
| 330443409 | PRS4    | 0                          | 0                        | 0                       | 0                          | 11.66                    | 3                       | 5                          | 0                        | 0                       | 0                          | 0                                     | 0                                    | 0                                       |
| 6322806   | PRI2    | 0                          | 0                        | 0                       | 0                          | 10.04                    | 3                       | 12                         | 0                        | 0                       | 0                          | 0                                     | 0                                    | 0                                       |
| 330443500 | UFD2    | 0                          | 0                        | 0                       | 0                          | 5.52                     | 3                       | 6                          | 0                        | 0                       | 0                          | 0                                     | 0                                    | 0                                       |
| 6324062   | PIK1    | 0                          | 0                        | 0                       | 0                          | 4.60                     | 3                       | 3                          | 0                        | 0                       | 0                          | 0                                     | 0                                    | 0                                       |
| 6324801   | HER1    | 0                          | 1.77                     | 1                       | 2                          | 3.69                     | 3                       | 5                          | 0                        | 0                       | 0                          | 0                                     | 0                                    | 0                                       |
| 398366237 | PRP28   | 0                          | 0                        | 0                       | 0                          | 8.16                     | 3                       | 5                          | 0                        | 0                       | 0                          | 0                                     | 0                                    | 0                                       |
| 6325096   | BEM4    | 0                          | 0                        | 0                       | 0                          | 4.90                     | 3                       | 5                          | 0                        | 0                       | 0                          | 0                                     | 0                                    | 0                                       |
| 6325402   | NOC4    | 0                          | 0                        | 0                       | 0                          | 8.15                     | 3                       | 5                          | 0                        | 0                       | 0                          | 0                                     | 0                                    | 0                                       |
| 6324770   | LIP5    | 6                          | 0                        | 0                       | 0                          | 13.77                    | 3                       | 8                          | 0                        | 0                       | 0                          | 0                                     | 0                                    | 0                                       |
| 398364793 | DMA2    | 0                          | 0                        | 0                       | 0                          | 10.15                    | 3                       | 7                          | 0                        | 0                       | 0                          | 0                                     | 0                                    | 0                                       |
| 398364875 | YML13   | 0                          | 0                        | 0                       | 0                          | 24.24                    | 4                       | 8                          | 0                        | 0                       | 0                          | 0                                     | 0                                    | 0                                       |
| 6322491   | GEA1    | 0                          | 0                        | 0                       | 0                          | 4.47                     | 4                       | 9                          | 0                        | 0                       | 0                          | 0                                     | 0                                    | 0                                       |
| 6323061   | RSC58   | 0                          | 0                        | 0                       | 0                          | 13.15                    | 4                       | 7                          | 0                        | 0                       | 0                          | 0                                     | 0                                    | 0                                       |
| 6323842   | MRPS17  | 0                          | 0                        | 0                       | 0                          | 21.10                    | 4                       | 6                          | 0                        | 0                       | 0                          | 0                                     | 0                                    | 0                                       |
| 6325121   | GIP3    | 0                          | 0                        | 0                       | 0                          | 4.23                     | 4                       | 10                         | 0                        | 0                       | 0                          | 0                                     | 0                                    | 0                                       |
| 16198342  | RGD2    | 0                          | 0                        | 0                       | 0                          | 10.22                    | 4                       | 12                         | 0                        | 0                       | 0                          | 0                                     | 0                                    | 0                                       |
| 6323045   | MEU1    | 0                          | 0                        | 0                       | 0                          | 21.66                    | 5                       | 17                         | 0                        | 0                       | 0                          | 0                                     | 0                                    | 0                                       |
| 6322286   | SWI3    | 0                          | 0                        | 0                       | 0                          | 10.91                    | 6                       | 20                         | 0                        | 0                       | 0                          | 0                                     | 0                                    | 0                                       |

























Table S1 - Smith-Kinnaman, *et al* (2014) Abbreviations: %SC = percent sequence coverage, UP = unique peptides, PSM = peptide spectrum matches

| Accession | Acronym | # PSM<br>TAP_Rtr1_<br>WT_1 | %SC<br>TAP_Rtr1_<br>WT_2 | UP<br>TAP_Rtr1_<br>WT_2 | # PSM<br>TAP_Rtr1_<br>WT_2 | %SC<br>TAP_Rtr1_<br>WT_3 | UP<br>TAP_Rtr1_<br>WT_3 | # PSM<br>TAP_Rtr1_<br>WT_3 | %SC<br>TAP_Rtr1_<br>WT_4 | UP<br>TAP_Rtr1_<br>WT_4 | # PSM<br>TAP_Rtr1_<br>WT_4 | %SC<br>TAP_Rtr1_<br>ctk1_del<br>etion | UP<br>TAP_Rtr1_<br>ctk1_del<br>etion | # PSM<br>TAP_Rtr1_<br>ctk1_del<br>etion |
|-----------|---------|----------------------------|--------------------------|-------------------------|----------------------------|--------------------------|-------------------------|----------------------------|--------------------------|-------------------------|----------------------------|---------------------------------------|--------------------------------------|-----------------------------------------|
| 6323630   | ERV25   | 0                          | 0                        | 0                       | 0                          | 0                        | 0                       | 0                          | 0                        | 0                       | 0                          | 0                                     | 0                                    | 0                                       |
| 6323716   | TVP18   | 0                          | 0                        | 0                       | 0                          | 0                        | 0                       | 0                          | 0                        | 0                       | 0                          | 0                                     | 0                                    | 0                                       |
| 6319289   | SNC1    | 0                          | 0                        | 0                       | 0                          | 0                        | 0                       | 0                          | 0                        | 0                       | 0                          | 0                                     | 0                                    | 0                                       |
| 398364281 | EMP24   | 0                          | 0                        | 0                       | 0                          | 0                        | 0                       | 0                          | 0                        | 0                       | 0                          | 0                                     | 0                                    | 0                                       |
| 6320298   | DNF2    | 0                          | 0                        | 0                       | 0                          | 0                        | 0                       | 0                          | 0                        | 0                       | 0                          | 0                                     | 0                                    | 0                                       |
| 330443597 | MNN5    | 0                          | 0                        | 0                       | 0                          | 3.07                     | 1                       | 1                          | 0                        | 0                       | 0                          | 0                                     | 0                                    | 0                                       |
| 6320897   | FCY2    | 0                          | 0                        | 0                       | 0                          | 0                        | 0                       | 0                          | 0                        | 0                       | 0                          | 0                                     | 0                                    | 0                                       |
| 330443542 | SAP155  | 0                          | 0                        | 0                       | 0                          | 2.00                     | 1                       | 2                          | 0                        | 0                       | 0                          | 0                                     | 0                                    | 0                                       |
| 14318521  | SPB4    | 0                          | 0                        | 0                       | 0                          | 1.82                     | 1                       | 2                          | 0                        | 0                       | 0                          | 0                                     | 0                                    | 0                                       |
| 6323367   | NUP2    | 0                          | 0                        | 0                       | 0                          | 4.58                     | 2                       | 5                          | 0                        | 0                       | 0                          | 0                                     | 0                                    | 0                                       |
| 6319303   | TPD3    | 0                          | 0                        | 0                       | 0                          | 8.19                     | 4                       | 11                         | 0                        | 0                       | 0                          | 0                                     | 0                                    | 0                                       |
| 6324166   | RIA1    | 0                          | 0                        | 0                       | 0                          | 4.95                     | 4                       | 9                          | 0                        | 0                       | 0                          | 0                                     | 0                                    | 0                                       |
| 398364557 | AIM21   | 0                          | 0                        | 0                       | 0                          | 0                        | 0                       | 0                          | 0                        | 0                       | 0                          | 0                                     | 0                                    | 0                                       |
| 6322369   | SRS2    | 0                          | 0                        | 0                       | 0                          | 0                        | 0                       | 0                          | 0                        | 0                       | 0                          | 0                                     | 0                                    | 0                                       |
| 6324088   | ZWF1    | 0                          | 0                        | 0                       | 0                          | 0                        | 0                       | 0                          | 0                        | 0                       | 0                          | 0                                     | 0                                    | 0                                       |
| 6319890   | TAF2    | 0                          | 0                        | 0                       | 0                          | 0                        | 0                       | 0                          | 0                        | 0                       | 0                          | 0                                     | 0                                    | 0                                       |
| 6320033   | SFA1    | 0                          | 0                        | 0                       | 0                          | 0                        | 0                       | 0                          | 0                        | 0                       | 0                          | 0                                     | 0                                    | 0                                       |
| 6325429   | BSP1    | 0                          | 0                        | 0                       | 0                          | 0                        | 0                       | 0                          | 0                        | 0                       | 0                          | 0                                     | 0                                    | 0                                       |
| 6323022   | YLL007C | 0                          | 0                        | 0                       | 0                          | 0                        | 0                       | 0                          | 0                        | 0                       | 0                          | 0                                     | 0                                    | 0                                       |
| 6324918   | YOR342C | 0                          | 0                        | 0                       | 0                          | 0                        | 0                       | 0                          | 0                        | 0                       | 0                          | 0                                     | 0                                    | 0                                       |
| 6320091   | TRM3    | 0                          | 0                        | 0                       | 0                          | 0                        | 0                       | 0                          | 0                        | 0                       | 0                          | 0                                     | 0                                    | 0                                       |
| 6322925   | SIS2    | 0                          | 0                        | 0                       | 0                          | 3.91                     | 1                       | 2                          | 0                        | 0                       | 0                          | 0                                     | 0                                    | 0                                       |
| 6321999   | SCH9    | 0                          | 0                        | 0                       | 0                          | 1.82                     | 1                       | 1                          | 0                        | 0                       | 0                          | 0                                     | 0                                    | 0                                       |
| 6320106   | RPN6    | 0                          | 0                        | 0                       | 0                          | 19.59                    | 6                       | 19                         | 0                        | 0                       | 0                          | 0                                     | 0                                    | 0                                       |
| 6320934   | PTC2    | 0                          | 0                        | 0                       | 0                          | 0                        | 0                       | 0                          | 0                        | 0                       | 0                          | 0                                     | 0                                    | 0                                       |
| 6322545   | STE18   | 0                          | 0                        | 0                       | 0                          | 0                        | 0                       | 0                          | 0                        | 0                       | 0                          | 0                                     | 0                                    | 0                                       |
| 27808714  | LAP3    | 0                          | 0                        | 0                       | 0                          | 0                        | 0                       | 0                          | 0                        | 0                       | 0                          | 0                                     | 0                                    | 0                                       |
| 6322410   | IRC8    | 0                          | 0                        | 0                       | 0                          | 0                        | 0                       | 0                          | 0                        | 0                       | 0                          | 0                                     | 0                                    | 0                                       |
| 14318532  | UBP6    | 0                          | 0                        | 0                       | 0                          | 6.61                     | 2                       | 3                          | 0                        | 0                       | 0                          | 0                                     | 0                                    | 0                                       |
| 6320129   | BRE1    | 0                          | 0                        | 0                       | 0                          | 9.43                     | 5                       | 17                         | 0                        | 0                       | 0                          | 0                                     | 0                                    | 0                                       |
| 6324287   | COG6    | 0                          | 0                        | 0                       | 0                          | 9.89                     | 5                       | 14                         | 0                        | 0                       | 0                          | 0                                     | 0                                    | 0                                       |
| 6320846   | NTF2    | 0                          | 0                        | 0                       | 0                          | 0                        | 0                       | 0                          | 0                        | 0                       | 0                          | 0                                     | 0                                    | 0                                       |
| 6324508   | MET22   | 0                          | 0                        | 0                       | 0                          | 0                        | 0                       | 0                          | 0                        | 0                       | 0                          | 0                                     | 0                                    | 0                                       |
| 6319975   | GCS1    | 0                          | 0                        | 0                       | 0                          | 9.66                     | 2                       | 6                          | 0                        | 0                       | 0                          | 0                                     | 0                                    | 0                                       |
| 63535562  | CHA1    | 0                          | 0                        | 0                       | 0                          | 16.39                    | 3                       | 9                          | 0                        | 0                       | 0                          | 0                                     | 0                                    | 0                                       |
| 6322141   | NEO1    | 0                          | 0                        | 0                       | 0                          | 0                        | 0                       | 0                          | 0                        | 0                       | 0                          | 0                                     | 0                                    | 0                                       |
| 398365175 | CDC28   | 0                          | 0                        | 0                       | 0                          | 6.38                     | 2                       | 3                          | 0                        | 0                       | 0                          | 0                                     | 0                                    | 0                                       |





Table S1 - Smith-Kinnaman, *et al* (2014) Abbreviations: %SC = percent sequence coverage, UP = unique peptides, PSM = peptide spectrum matches

| Accession | Acronym | # PSM<br>TAP_Rtr1_<br>WT_1 | %SC<br>TAP_Rtr1_<br>WT_2 | UP<br>TAP_Rtr1_<br>WT_2 | # PSM<br>TAP_Rtr1_<br>WT_2 | %SC<br>TAP_Rtr1_<br>WT_3 | UP<br>TAP_Rtr1_<br>WT_3 | # PSM<br>TAP_Rtr1_<br>WT_3 | %SC<br>TAP_Rtr1_<br>WT_4 | UP<br>TAP_Rtr1_<br>WT_4 | # PSM<br>TAP_Rtr1_<br>WT_4 | %SC<br>TAP_Rtr1_<br>ctk1_del<br>etion | UP<br>TAP_Rtr1_<br>ctk1_del<br>etion | # PSM<br>TAP_Rtr1_<br>ctk1_del<br>etion |
|-----------|---------|----------------------------|--------------------------|-------------------------|----------------------------|--------------------------|-------------------------|----------------------------|--------------------------|-------------------------|----------------------------|---------------------------------------|--------------------------------------|-----------------------------------------|
| 6323323   | SEC72   | 0                          | 0                        | 0                       | 0                          | 0                        | 0                       | 0                          | 0                        | 0                       | 0                          | 0                                     | 0                                    | 0                                       |
| 6321649   | YGR210C | 0                          | 0                        | 0                       | 0                          | 0                        | 0                       | 0                          | 0                        | 0                       | 0                          | 0                                     | 0                                    | 0                                       |
| 6323423   | CCW14   | 0                          | 0                        | 0                       | 0                          | 0                        | 0                       | 0                          | 0                        | 0                       | 0                          | 0                                     | 0                                    | 0                                       |
| 398366295 | HSP78   | 0                          | 0                        | 0                       | 0                          | 11.10                    | 6                       | 17                         | 0                        | 0                       | 0                          | 0                                     | 0                                    | 0                                       |
| 6324169   | YGP1    | 0                          | 0                        | 0                       | 0                          | 3.39                     | 1                       | 2                          | 0                        | 0                       | 0                          | 0                                     | 0                                    | 0                                       |
| 6323085   | ERG3    | 0                          | 0                        | 0                       | 0                          | 0                        | 0                       | 0                          | 0                        | 0                       | 0                          | 0                                     | 0                                    | 0                                       |
| 6319997   | RTN2    | 0                          | 0                        | 0                       | 0                          | 0                        | 0                       | 0                          | 0                        | 0                       | 0                          | 0                                     | 0                                    | 0                                       |
| 14318526  | RPN11   | 0                          | 0                        | 0                       | 0                          | 8.50                     | 2                       | 2                          | 0                        | 0                       | 0                          | 0                                     | 0                                    | 0                                       |
| 6320913   | ARG5,6  | 0                          | 0                        | 0                       | 0                          | 1.51                     | 1                       | 1                          | 0                        | 0                       | 0                          | 0                                     | 0                                    | 0                                       |
| 398365815 | PHB1    | 2                          | 13.94                    | 1                       | 1                          | 6.97                     | 1                       | 3                          | 0                        | 0                       | 0                          | 0                                     | 0                                    | 0                                       |
| 14318497  | FRS2    | 0                          | 0                        | 0                       | 0                          | 0                        | 0                       | 0                          | 0                        | 0                       | 0                          | 0                                     | 0                                    | 0                                       |
| 6320291   | SSS1    | 0                          | 0                        | 0                       | 0                          | 0                        | 0                       | 0                          | 0                        | 0                       | 0                          | 0                                     | 0                                    | 0                                       |
| 6319367   | ECM21   | 1                          | 0                        | 0                       | 0                          | 1.16                     | 1                       | 1                          | 0                        | 0                       | 0                          | 0.54                                  | 1                                    | 1                                       |
| 6319714   | PRP5    | 0                          | 0                        | 0                       | 0                          | 0                        | 0                       | 0                          | 1.06                     | 1                       | 1                          | 1.06                                  | 1                                    | 1                                       |
| 6323841   | YMR187C | 0                          | 0                        | 0                       | 0                          | 0                        | 0                       | 0                          | 0                        | 0                       | 0                          | 1.39                                  | 1                                    | 1                                       |
| 6321813   | MAS2    | 0                          | 0                        | 0                       | 0                          | 4.98                     | 2                       | 2                          | 0                        | 0                       | 0                          | 1.66                                  | 1                                    | 1                                       |
| 6322607   | HMS2    | 0                          | 3.35                     | 1                       | 1                          | 0                        | 0                       | 0                          | 0                        | 0                       | 0                          | 2.23                                  | 1                                    | 1                                       |
| 6319750   | UBX7    | 0                          | 0                        | 0                       | 0                          | 4.59                     | 1                       | 1                          | 0                        | 0                       | 0                          | 2.29                                  | 1                                    | 1                                       |
| 6322917   | OAF3    | 0                          | 0                        | 0                       | 0                          | 0                        | 0                       | 0                          | 0                        | 0                       | 0                          | 3.82                                  | 1                                    | 1                                       |
| 37362687  | FOL1    | 0                          | 0                        | 0                       | 0                          | 1.21                     | 1                       | 3                          | 1.21                     | 1                       | 1                          | 0                                     | 0                                    | 0                                       |
| 37362652  | PGD1    | 0                          | 0                        | 0                       | 0                          | 8.31                     | 2                       | 3                          | 2.52                     | 1                       | 1                          | 0                                     | 0                                    | 0                                       |
| 37362689  | GPI15   | 0                          | 0                        | 0                       | 0                          | 0                        | 0                       | 0                          | 3.93                     | 1                       | 3                          | 0                                     | 0                                    | 0                                       |
| 398364551 | CBK1    | 0                          | 0                        | 0                       | 0                          | 0                        | 0                       | 0                          | 0.79                     | 1                       | 1                          | 0                                     | 0                                    | 0                                       |
| 6325386   | SCD6    | 0                          | 0                        | 0                       | 0                          | 4.58                     | 1                       | 1                          | 6.59                     | 2                       | 3                          | 0                                     | 0                                    | 0                                       |
| 6320372   | CDC37   | 0                          | 0                        | 0                       | 0                          | 3.75                     | 1                       | 1                          | 0                        | 0                       | 0                          | 0                                     | 0                                    | 0                                       |
| 6321266   | NUP49   | 0                          | 0                        | 0                       | 0                          | 1.48                     | 1                       | 1                          | 0                        | 0                       | 0                          | 0                                     | 0                                    | 0                                       |
| 6325406   | YPR148C | 0                          | 0                        | 0                       | 0                          | 3.22                     | 1                       | 2                          | 0                        | 0                       | 0                          | 0                                     | 0                                    | 0                                       |
| 6321873   | LRP1    | 0                          | 0                        | 0                       | 0                          | 7.07                     | 1                       | 3                          | 0                        | 0                       | 0                          | 0                                     | 0                                    | 0                                       |
| 6325152   | SYH1    | 0                          | 0                        | 0                       | 0                          | 1.65                     | 1                       | 1                          | 0                        | 0                       | 0                          | 0                                     | 0                                    | 0                                       |
| 6320036   | CDC36   | 0                          | 0                        | 0                       | 0                          | 7.33                     | 1                       | 1                          | 0                        | 0                       | 0                          | 0                                     | 0                                    | 0                                       |
| 6322810   | VPS24   | 0                          | 0                        | 0                       | 0                          | 7.14                     | 1                       | 1                          | 0                        | 0                       | 0                          | 0                                     | 0                                    | 0                                       |
| 6323125   | KIN2    | 0                          | 0                        | 0                       | 0                          | 0.78                     | 1                       | 2                          | 0                        | 0                       | 0                          | 0                                     | 0                                    | 0                                       |
| 6319555   | SPT7    | 0                          | 0                        | 0                       | 0                          | 0.90                     | 1                       | 1                          | 0                        | 0                       | 0                          | 0                                     | 0                                    | 0                                       |
| 6322523   | RPA12   | 0                          | 0                        | 0                       | 0                          | 12.00                    | 1                       | 2                          | 0                        | 0                       | 0                          | 0                                     | 0                                    | 0                                       |
| 6324622   | RAT1    | 0                          | 0                        | 0                       | 0                          | 1.29                     | 1                       | 1                          | 0                        | 0                       | 0                          | 0                                     | 0                                    | 0                                       |
| 6322788   | MSN4    | 0                          | 0                        | 0                       | 0                          | 2.70                     | 1                       | 5                          | 0                        | 0                       | 0                          | 0                                     | 0                                    | 0                                       |
| 6321889   | YHR097C | 0                          | 0                        | 0                       | 0                          | 4.64                     | 1                       | 2                          | 0                        | 0                       | 0                          | 0                                     | 0                                    | 0                                       |

Table S1 - Smith-Kinnaman, *et al* (2014) Abbreviations: %SC = percent sequence coverage, UP = unique peptides, PSM = peptide spectrum matches

| Accession | Acronym | # PSM<br>TAP_Rtr1_<br>WT_1 | %SC<br>TAP_Rtr1_<br>WT_2 | UP<br>TAP_Rtr1_<br>WT_2 | # PSM<br>TAP_Rtr1_<br>WT_2 | %SC<br>TAP_Rtr1_<br>WT_3 | UP<br>TAP_Rtr1_<br>WT_3 | # PSM<br>TAP_Rtr1_<br>WT_3 | %SC<br>TAP_Rtr1_<br>WT_4 | UP<br>TAP_Rtr1_<br>WT_4 | # PSM<br>TAP_Rtr1_<br>WT_4 | %SC<br>TAP_Rtr1_<br>ctk1_del<br>etion | UP<br>TAP_Rtr1_<br>ctk1_del<br>etion | # PSM<br>TAP_Rtr1_<br>ctk1_del<br>etion |
|-----------|---------|----------------------------|--------------------------|-------------------------|----------------------------|--------------------------|-------------------------|----------------------------|--------------------------|-------------------------|----------------------------|---------------------------------------|--------------------------------------|-----------------------------------------|
| 6324330   | RPC34   | 0                          | 0                        | 0                       | 0                          | 4.10                     | 1                       | 1                          | 0                        | 0                       | 0                          | 0                                     | 0                                    | 0                                       |
| 6321796   | SOD2    | 0                          | 0                        | 0                       | 0                          | 6.01                     | 1                       | 5                          | 0                        | 0                       | 0                          | 0                                     | 0                                    | 0                                       |
| 6320862   | YAT2    | 4                          | 0                        | 0                       | 0                          | 1.52                     | 1                       | 1                          | 0                        | 0                       | 0                          | 0                                     | 0                                    | 0                                       |
| 6320360   | RPA14   | 0                          | 0                        | 0                       | 0                          | 14.60                    | 1                       | 4                          | 0                        | 0                       | 0                          | 0                                     | 0                                    | 0                                       |
| 6324174   | YNL155W | 0                          | 0                        | 0                       | 0                          | 4.38                     | 1                       | 2                          | 0                        | 0                       | 0                          | 0                                     | 0                                    | 0                                       |
| 6323305   | SMD2    | 0                          | 0                        | 0                       | 0                          | 7.27                     | 1                       | 2                          | 0                        | 0                       | 0                          | 0                                     | 0                                    | 0                                       |
| 6322296   | HAL5    | 0                          | 0                        | 0                       | 0                          | 2.11                     | 1                       | 2                          | 0                        | 0                       | 0                          | 0                                     | 0                                    | 0                                       |
| 6323559   | TDA9    | 0                          | 0                        | 0                       | 0                          | 1.04                     | 1                       | 1                          | 0                        | 0                       | 0                          | 0                                     | 0                                    | 0                                       |
| 6324374   | TRM112  | 0                          | 0                        | 0                       | 0                          | 12.59                    | 1                       | 1                          | 0                        | 0                       | 0                          | 0                                     | 0                                    | 0                                       |
| 6325225   | SVL3    | 0                          | 0                        | 0                       | 0                          | 1.94                     | 1                       | 1                          | 0                        | 0                       | 0                          | 0                                     | 0                                    | 0                                       |
| 6324874   | BUD7    | 0                          | 0                        | 0                       | 0                          | 2.28                     | 1                       | 3                          | 0                        | 0                       | 0                          | 0                                     | 0                                    | 0                                       |
| 6322261   | ACO2    | 0                          | 0                        | 0                       | 0                          | 1.01                     | 1                       | 1                          | 0                        | 0                       | 0                          | 0                                     | 0                                    | 0                                       |
| 398365029 | BCH2    | 0                          | 0                        | 0                       | 0                          | 1.57                     | 1                       | 1                          | 0                        | 0                       | 0                          | 0                                     | 0                                    | 0                                       |
| 6324371   | MVD1    | 0                          | 0                        | 0                       | 0                          | 4.80                     | 1                       | 1                          | 0                        | 0                       | 0                          | 0                                     | 0                                    | 0                                       |
| 6321623   | UBR1    | 0                          | 0                        | 0                       | 0                          | 1.08                     | 1                       | 1                          | 0                        | 0                       | 0                          | 0                                     | 0                                    | 0                                       |
| 6321425   | PDR1    | 0                          | 0                        | 0                       | 0                          | 1.31                     | 1                       | 1                          | 0                        | 0                       | 0                          | 0                                     | 0                                    | 0                                       |
| 6324203   | SPC98   | 0                          | 0                        | 0                       | 0                          | 1.89                     | 1                       | 1                          | 0                        | 0                       | 0                          | 0                                     | 0                                    | 0                                       |
| 6325129   | TBF1    | 0                          | 0                        | 0                       | 0                          | 2.31                     | 1                       | 1                          | 0                        | 0                       | 0                          | 0                                     | 0                                    | 0                                       |
| 6322644   | LOS1    | 0                          | 0                        | 0                       | 0                          | 1.73                     | 1                       | 1                          | 0                        | 0                       | 0                          | 0                                     | 0                                    | 0                                       |
| 6322363   | SAP185  | 0                          | 0                        | 0                       | 0                          | 1.04                     | 1                       | 1                          | 0                        | 0                       | 0                          | 0                                     | 0                                    | 0                                       |
| 6323081   | IES3    | 0                          | 0                        | 0                       | 0                          | 8.40                     | 1                       | 2                          | 0                        | 0                       | 0                          | 0                                     | 0                                    | 0                                       |
| 6321378   | YBP2    | 0                          | 0                        | 0                       | 0                          | 1.72                     | 1                       | 2                          | 0                        | 0                       | 0                          | 0                                     | 0                                    | 0                                       |
| 398364843 | POL1    | 0                          | 0                        | 0                       | 0                          | 1.29                     | 1                       | 1                          | 0                        | 0                       | 0                          | 0                                     | 0                                    | 0                                       |
| 6321764   | NPR3    | 0                          | 0                        | 0                       | 0                          | 2.53                     | 1                       | 1                          | 0                        | 0                       | 0                          | 0                                     | 0                                    | 0                                       |
| 398366625 | SDC1    | 0                          | 0                        | 0                       | 0                          | 6.86                     | 1                       | 1                          | 0                        | 0                       | 0                          | 0                                     | 0                                    | 0                                       |
| 6322540   | AIM24   | 0                          | 0                        | 0                       | 0                          | 2.79                     | 1                       | 1                          | 0                        | 0                       | 0                          | 0                                     | 0                                    | 0                                       |
| 6320026   | AIR2    | 0                          | 0                        | 0                       | 0                          | 4.94                     | 1                       | 1                          | 0                        | 0                       | 0                          | 0                                     | 0                                    | 0                                       |
| 6323114   | ARP6    | 0                          | 0                        | 0                       | 0                          | 2.51                     | 1                       | 1                          | 0                        | 0                       | 0                          | 0                                     | 0                                    | 0                                       |
| 6324096   | BNI4    | 0                          | 0                        | 0                       | 0                          | 1.79                     | 1                       | 1                          | 0                        | 0                       | 0                          | 0                                     | 0                                    | 0                                       |
| 6322876   | DBP7    | 0                          | 0                        | 0                       | 0                          | 2.29                     | 1                       | 1                          | 0                        | 0                       | 0                          | 0                                     | 0                                    | 0                                       |
| 6321458   | YGR021W | 0                          | 0                        | 0                       | 0                          | 3.45                     | 1                       | 1                          | 0                        | 0                       | 0                          | 0                                     | 0                                    | 0                                       |
| 398365777 | YGR122W | 0                          | 0                        | 0                       | 0                          | 3.73                     | 1                       | 1                          | 0                        | 0                       | 0                          | 0                                     | 0                                    | 0                                       |
| 398365293 | LAS1    | 0                          | 0                        | 0                       | 0                          | 2.79                     | 1                       | 1                          | 0                        | 0                       | 0                          | 0                                     | 0                                    | 0                                       |
| 398364695 | MAK11   | 0                          | 0                        | 0                       | 0                          | 3.85                     | 1                       | 1                          | 0                        | 0                       | 0                          | 0                                     | 0                                    | 0                                       |
| 6324805   | MKK1    | 0                          | 0                        | 0                       | 0                          | 3.35                     | 1                       | 1                          | 0                        | 0                       | 0                          | 0                                     | 0                                    | 0                                       |
| 6321398   | HEM2    | 0                          | 0                        | 0                       | 0                          | 5.56                     | 1                       | 1                          | 0                        | 0                       | 0                          | 0                                     | 0                                    | 0                                       |
| 6319365   | RTG3    | 0                          | 0                        | 0                       | 0                          | 2.06                     | 1                       | 1                          | 0                        | 0                       | 0                          | 0                                     | 0                                    | 0                                       |

Table S1 - Smith-Kinnaman, *et al* (2014) Abbreviations: %SC = percent sequence coverage, UP = unique peptides, PSM = peptide spectrum matches

| Accession | Acronym | # PSM<br>TAP_Rtr1_<br>WT_1 | %SC<br>TAP_Rtr1_<br>WT_2 | UP<br>TAP_Rtr1_<br>WT_2 | # PSM<br>TAP_Rtr1_<br>WT_2 | %SC<br>TAP_Rtr1_<br>WT_3 | UP<br>TAP_Rtr1_<br>WT_3 | # PSM<br>TAP_Rtr1_<br>WT_3 | %SC<br>TAP_Rtr1_<br>WT_4 | UP<br>TAP_Rtr1_<br>WT_4 | # PSM<br>TAP_Rtr1_<br>WT_4 | %SC<br>TAP_Rtr1_<br>ctk1_del<br>etion | UP<br>TAP_Rtr1_<br>ctk1_del<br>etion | # PSM<br>TAP_Rtr1_<br>ctk1_del<br>etion |
|-----------|---------|----------------------------|--------------------------|-------------------------|----------------------------|--------------------------|-------------------------|----------------------------|--------------------------|-------------------------|----------------------------|---------------------------------------|--------------------------------------|-----------------------------------------|
| 6322549   | GRR1    | 0                          | 0                        | 0                       | 0                          | 0.96                     | 1                       | 1                          | 0                        | 0                       | 0                          | 0                                     | 0                                    | 0                                       |
| 6323551   | UFO1    | 0                          | 0                        | 0                       | 0                          | 1.80                     | 1                       | 1                          | 0                        | 0                       | 0                          | 0                                     | 0                                    | 0                                       |
| 6323108   | SIC1    | 0                          | 0                        | 0                       | 0                          | 6.69                     | 1                       | 1                          | 0                        | 0                       | 0                          | 0                                     | 0                                    | 0                                       |
| 6324100   | URE2    | 0                          | 0                        | 0                       | 0                          | 3.39                     | 1                       | 1                          | 0                        | 0                       | 0                          | 0                                     | 0                                    | 0                                       |
| 6321534   | ASK10   | 0                          | 0                        | 0                       | 0                          | 1.48                     | 1                       | 1                          | 0                        | 0                       | 0                          | 0                                     | 0                                    | 0                                       |
| 6322907   | DYN1    | 0                          | 0                        | 0                       | 0                          | 0.49                     | 1                       | 1                          | 0                        | 0                       | 0                          | 0                                     | 0                                    | 0                                       |
| 6319529   | PRP6    | 0                          | 0                        | 0                       | 0                          | 1.67                     | 1                       | 3                          | 0                        | 0                       | 0                          | 0                                     | 0                                    | 0                                       |
| 6321907   | DMA1    | 0                          | 0                        | 0                       | 0                          | 5.77                     | 1                       | 1                          | 0                        | 0                       | 0                          | 0                                     | 0                                    | 0                                       |
| 398364783 | FES1    | 0                          | 0                        | 0                       | 0                          | 10.69                    | 2                       | 7                          | 0                        | 0                       | 0                          | 0                                     | 0                                    | 0                                       |
| 6324188   | AAH1    | 0                          | 0                        | 0                       | 0                          | 9.22                     | 2                       | 2                          | 0                        | 0                       | 0                          | 0                                     | 0                                    | 0                                       |
| 398364975 | SHE3    | 0                          | 0                        | 0                       | 0                          | 7.29                     | 2                       | 4                          | 0                        | 0                       | 0                          | 0                                     | 0                                    | 0                                       |
| 398364251 | RAD23   | 0                          | 0                        | 0                       | 0                          | 7.54                     | 2                       | 4                          | 0                        | 0                       | 0                          | 0                                     | 0                                    | 0                                       |
| 6320565   | GGA1    | 0                          | 0                        | 0                       | 0                          | 5.21                     | 2                       | 2                          | 0                        | 0                       | 0                          | 0                                     | 0                                    | 0                                       |
| 398365259 | UBP2    | 0                          | 0                        | 0                       | 0                          | 2.28                     | 2                       | 4                          | 0                        | 0                       | 0                          | 0                                     | 0                                    | 0                                       |
| 398364701 | CYR1    | 0                          | 0                        | 0                       | 0                          | 1.33                     | 2                       | 2                          | 0                        | 0                       | 0                          | 0                                     | 0                                    | 0                                       |
| 398365573 | GRX3    | 0                          | 0                        | 0                       | 0                          | 8.42                     | 2                       | 5                          | 0                        | 0                       | 0                          | 0                                     | 0                                    | 0                                       |
| 6321217   | NIF3    | 0                          | 0                        | 0                       | 0                          | 16.32                    | 2                       | 2                          | 0                        | 0                       | 0                          | 0                                     | 0                                    | 0                                       |
| 6323525   | BUL2    | 0                          | 0                        | 0                       | 0                          | 3.15                     | 2                       | 3                          | 0                        | 0                       | 0                          | 0                                     | 0                                    | 0                                       |
| 6324490   | ATG19   | 0                          | 0                        | 0                       | 0                          | 7.23                     | 2                       | 4                          | 0                        | 0                       | 0                          | 0                                     | 0                                    | 0                                       |
| 14318523  | LOC1    | 0                          | 0                        | 0                       | 0                          | 11.76                    | 2                       | 3                          | 0                        | 0                       | 0                          | 0                                     | 0                                    | 0                                       |
| 37362641  | CIN8    | 0                          | 0                        | 0                       | 0                          | 2.50                     | 2                       | 2                          | 0                        | 0                       | 0                          | 0                                     | 0                                    | 0                                       |
| 6324033   | MON2    | 0                          | 0                        | 0                       | 0                          | 1.22                     | 2                       | 2                          | 0                        | 0                       | 0                          | 0                                     | 0                                    | 0                                       |
| 6321948   | RTT107  | 0                          | 0                        | 0                       | 0                          | 2.15                     | 2                       | 2                          | 0                        | 0                       | 0                          | 0                                     | 0                                    | 0                                       |
| 14318438  | MET5    | 0                          | 0                        | 0                       | 0                          | 1.87                     | 2                       | 3                          | 0                        | 0                       | 0                          | 0                                     | 0                                    | 0                                       |
| 6320454   | YDR248C | 0                          | 0                        | 0                       | 0                          | 17.10                    | 2                       | 6                          | 0                        | 0                       | 0                          | 0                                     | 0                                    | 0                                       |
| 398366363 | SNX3    | 0                          | 0                        | 0                       | 0                          | 10.49                    | 2                       | 4                          | 0                        | 0                       | 0                          | 0                                     | 0                                    | 0                                       |
| 398365949 | NAT5    | 0                          | 0                        | 0                       | 0                          | 17.61                    | 2                       | 3                          | 0                        | 0                       | 0                          | 0                                     | 0                                    | 0                                       |
| 6324279   | SFB2    | 0                          | 0                        | 0                       | 0                          | 3.31                     | 2                       | 4                          | 0                        | 0                       | 0                          | 0                                     | 0                                    | 0                                       |
| 6322400   | NUP82   | 0                          | 0                        | 0                       | 0                          | 5.19                     | 2                       | 8                          | 0                        | 0                       | 0                          | 0                                     | 0                                    | 0                                       |
| 398366177 | ZPR1    | 0                          | 0                        | 0                       | 0                          | 7.41                     | 3                       | 5                          | 0                        | 0                       | 0                          | 0                                     | 0                                    | 0                                       |
| 6323054   | SED5    | 0                          | 0                        | 0                       | 0                          | 12.94                    | 3                       | 4                          | 0                        | 0                       | 0                          | 0                                     | 0                                    | 0                                       |
| 6324123   | RTT106  | 0                          | 0                        | 0                       | 0                          | 9.45                     | 3                       | 8                          | 0                        | 0                       | 0                          | 0                                     | 0                                    | 0                                       |
| 6319977   | WHI4    | 0                          | 0                        | 0                       | 0                          | 6.63                     | 3                       | 6                          | 0                        | 0                       | 0                          | 0                                     | 0                                    | 0                                       |
| 398365083 | SKN7    | 0                          | 0                        | 0                       | 0                          | 7.88                     | 3                       | 8                          | 0                        | 0                       | 0                          | 0                                     | 0                                    | 0                                       |
| 14318486  | RIM15   | 0                          | 0                        | 0                       | 0                          | 2.82                     | 3                       | 5                          | 0                        | 0                       | 0                          | 0                                     | 0                                    | 0                                       |
| 398366197 | PCF11   | 0                          | 0                        | 0                       | 0                          | 5.27                     | 3                       | 5                          | 0                        | 0                       | 0                          | 0                                     | 0                                    | 0                                       |
| 6681848   | MOB1    | 0                          | 0                        | 0                       | 0                          | 16.24                    | 3                       | 4                          | 0                        | 0                       | 0                          | 0                                     | 0                                    | 0                                       |















Table S1 - Smith-Kinnaman, *et al* (2014) Abbreviations: %SC = percent sequence coverage, UP = unique peptides, PSM = peptide spectrum matches

| Accession | Acronym | # PSM<br>TAP_Rtr1_<br>WT_1 | %SC<br>TAP_Rtr1_<br>WT_2 | UP<br>TAP_Rtr1_<br>WT_2 | # PSM<br>TAP_Rtr1_<br>WT_2 | %SC<br>TAP_Rtr1_<br>WT_3 | UP<br>TAP_Rtr1_<br>WT_3 | # PSM<br>TAP_Rtr1_<br>WT_3 | %SC<br>TAP_Rtr1_<br>WT_4 | UP<br>TAP_Rtr1_<br>WT_4 | # PSM<br>TAP_Rtr1_<br>WT_4 | %SC<br>TAP_Rtr1_<br>ctk1_del<br>etion | UP<br>TAP_Rtr1_<br>ctk1_del<br>etion | # PSM<br>TAP_Rtr1_<br>ctk1_del<br>etion |
|-----------|---------|----------------------------|--------------------------|-------------------------|----------------------------|--------------------------|-------------------------|----------------------------|--------------------------|-------------------------|----------------------------|---------------------------------------|--------------------------------------|-----------------------------------------|
| 6322378   | TAX4    | 0                          | 0                        | 0                       | 0                          | 0                        | 0                       | 0                          | 0                        | 0                       | 0                          | 0                                     | 0                                    | 0                                       |
| 6320848   | TIR1    | 0                          | 0                        | 0                       | 0                          | 0                        | 0                       | 0                          | 0                        | 0                       | 0                          | 0                                     | 0                                    | 0                                       |
| 6320093   | TMA17   | 0                          | 0                        | 0                       | 0                          | 0                        | 0                       | 0                          | 0                        | 0                       | 0                          | 0                                     | 0                                    | 0                                       |
| 6322332   | TRK1    | 0                          | 0                        | 0                       | 0                          | 0                        | 0                       | 0                          | 0                        | 0                       | 0                          | 0                                     | 0                                    | 0                                       |
| 6320738   | QCR7    | 0                          | 0                        | 0                       | 0                          | 0                        | 0                       | 0                          | 0                        | 0                       | 0                          | 0                                     | 0                                    | 0                                       |
| 6321543   | VOA1    | 0                          | 0                        | 0                       | 0                          | 0                        | 0                       | 0                          | 0                        | 0                       | 0                          | 0                                     | 0                                    | 0                                       |
| 41629668  | VPS8    | 0                          | 0                        | 0                       | 0                          | 0                        | 0                       | 0                          | 0                        | 0                       | 0                          | 0                                     | 0                                    | 0                                       |
| 6323150   | YPS3    | 0                          | 0                        | 0                       | 0                          | 0                        | 0                       | 0                          | 0                        | 0                       | 0                          | 0                                     | 0                                    | 0                                       |
| 398365307 | EHT1    | 0                          | 0                        | 0                       | 0                          | 0                        | 0                       | 0                          | 0                        | 0                       | 0                          | 0                                     | 0                                    | 0                                       |
| 6322739   | KTI12   | 0                          | 0                        | 0                       | 0                          | 0                        | 0                       | 0                          | 0                        | 0                       | 0                          | 0                                     | 0                                    | 0                                       |
| 398366117 | ELP2    | 0                          | 0                        | 0                       | 0                          | 0                        | 0                       | 0                          | 0                        | 0                       | 0                          | 0                                     | 0                                    | 0                                       |
| 6324932   | CIR2    | 0                          | 0                        | 0                       | 0                          | 0                        | 0                       | 0                          | 0                        | 0                       | 0                          | 0                                     | 0                                    | 0                                       |
| 6323129   | ERG27   | 0                          | 0                        | 0                       | 0                          | 0                        | 0                       | 0                          | 0                        | 0                       | 0                          | 0                                     | 0                                    | 0                                       |
| 6322737   | ABF1    | 0                          | 0                        | 0                       | 0                          | 0                        | 0                       | 0                          | 0                        | 0                       | 0                          | 0                                     | 0                                    | 0                                       |
| 6321278   | AIM14   | 0                          | 0                        | 0                       | 0                          | 0                        | 0                       | 0                          | 0                        | 0                       | 0                          | 0                                     | 0                                    | 0                                       |
| 398364589 | DSN1    | 0                          | 0                        | 0                       | 0                          | 0                        | 0                       | 0                          | 0                        | 0                       | 0                          | 0                                     | 0                                    | 0                                       |
| 6324870   | YOR296W | 0                          | 0                        | 0                       | 0                          | 0                        | 0                       | 0                          | 0                        | 0                       | 0                          | 0                                     | 0                                    | 0                                       |
| 398365441 | ISN1    | 0                          | 0                        | 0                       | 0                          | 0                        | 0                       | 0                          | 0                        | 0                       | 0                          | 0                                     | 0                                    | 0                                       |
| 6320409   | RAV2    | 0                          | 0                        | 0                       | 0                          | 0                        | 0                       | 0                          | 0                        | 0                       | 0                          | 0                                     | 0                                    | 0                                       |
| 398366501 | MRPS2   | 0                          | 0                        | 0                       | 0                          | 0                        | 0                       | 0                          | 0                        | 0                       | 0                          | 0                                     | 0                                    | 0                                       |
| 398365469 | RPL40B  | 0                          | 0                        | 0                       | 0                          | 0                        | 0                       | 0                          | 0                        | 0                       | 0                          | 0                                     | 0                                    | 0                                       |
| 398364921 | TFC1    | 0                          | 0                        | 0                       | 0                          | 0                        | 0                       | 0                          | 0                        | 0                       | 0                          | 0                                     | 0                                    | 0                                       |
| 6320130   | YDL073W | 0                          | 0                        | 0                       | 0                          | 0                        | 0                       | 0                          | 0                        | 0                       | 0                          | 0                                     | 0                                    | 0                                       |
| 6321209   | SHE10   | 0                          | 0                        | 0                       | 0                          | 0                        | 0                       | 0                          | 0                        | 0                       | 0                          | 0                                     | 0                                    | 0                                       |
| 6323662   | FMS1    | 0                          | 0                        | 0                       | 0                          | 0                        | 0                       | 0                          | 0                        | 0                       | 0                          | 0                                     | 0                                    | 0                                       |
| 398365025 | KCS1    | 0                          | 0                        | 0                       | 0                          | 0                        | 0                       | 0                          | 0                        | 0                       | 0                          | 0                                     | 0                                    | 0                                       |
| 398365489 | LST8    | 0                          | 0                        | 0                       | 0                          | 0                        | 0                       | 0                          | 0                        | 0                       | 0                          | 0                                     | 0                                    | 0                                       |
| 6322593   | XPT1    | 0                          | 0                        | 0                       | 0                          | 0                        | 0                       | 0                          | 0                        | 0                       | 0                          | 0                                     | 0                                    | 0                                       |
| 398366545 | ARO10   | 0                          | 0                        | 0                       | 0                          | 0                        | 0                       | 0                          | 0                        | 0                       | 0                          | 0                                     | 0                                    | 0                                       |
| 398366635 | PHO8    | 0                          | 0                        | 0                       | 0                          | 0                        | 0                       | 0                          | 0                        | 0                       | 0                          | 0                                     | 0                                    | 0                                       |
| 6321005   | COG3    | 0                          | 0                        | 0                       | 0                          | 4.99                     | 3                       | 3                          | 0                        | 0                       | 0                          | 2.00                                  | 1                                    | 1                                       |
| 398364553 | NBP35   | 0                          | 0                        | 0                       | 0                          | 6.71                     | 1                       | 1                          | 0                        | 0                       | 0                          | 2.44                                  | 1                                    | 1                                       |
| 6323569   | COG8    | 0                          | 0                        | 0                       | 0                          | 4.78                     | 2                       | 4                          | 0                        | 0                       | 0                          | 2.97                                  | 1                                    | 3                                       |
| 6322229   | GTT1    | 5                          | 0                        | 0                       | 0                          | 8.97                     | 2                       | 2                          | 3.85                     | 1                       | 1                          | 0                                     | 0                                    | 0                                       |
| 398366485 | ASP1    | 0                          | 0                        | 0                       | 0                          | 3.67                     | 1                       | 1                          | 0                        | 0                       | 0                          | 0                                     | 0                                    | 0                                       |
| 398365871 | MGE1    | 0                          | 0                        | 0                       | 0                          | 4.39                     | 1                       | 1                          | 0                        | 0                       | 0                          | 0                                     | 0                                    | 0                                       |
| 6324690   | RPO31   | 0                          | 0                        | 0                       | 0                          | 1.30                     | 1                       | 3                          | 0                        | 0                       | 0                          | 0                                     | 0                                    | 0                                       |

Table S1 - Smith-Kinnaman, *et al* (2014) Abbreviations: %SC = percent sequence coverage, UP = unique peptides, PSM = peptide spectrum matches

| Accession | Acronym | # PSM<br>TAP_Rtr1_<br>WT_1 | %SC<br>TAP_Rtr1_<br>WT_2 | UP<br>TAP_Rtr1_<br>WT_2 | # PSM<br>TAP_Rtr1_<br>WT_2 | %SC<br>TAP_Rtr1_<br>WT_3 | UP<br>TAP_Rtr1_<br>WT_3 | # PSM<br>TAP_Rtr1_<br>WT_3 | %SC<br>TAP_Rtr1_<br>WT_4 | UP<br>TAP_Rtr1_<br>WT_4 | # PSM<br>TAP_Rtr1_<br>WT_4 | %SC<br>TAP_Rtr1_<br>ctk1_del<br>etion | UP<br>TAP_Rtr1_<br>ctk1_del<br>etion | # PSM<br>TAP_Rtr1_<br>ctk1_del<br>etion |
|-----------|---------|----------------------------|--------------------------|-------------------------|----------------------------|--------------------------|-------------------------|----------------------------|--------------------------|-------------------------|----------------------------|---------------------------------------|--------------------------------------|-----------------------------------------|
| 6324946   | MRS6    | 0                          | 0                        | 0                       | 0                          | 2.32                     | 1                       | 4                          | 0                        | 0                       | 0                          | 0                                     | 0                                    | 0                                       |
| 6325052   | HRR25   | 0                          | 0                        | 0                       | 0                          | 4.66                     | 1                       | 1                          | 0                        | 0                       | 0                          | 0                                     | 0                                    | 0                                       |
| 6324631   | SGT1    | 0                          | 0                        | 0                       | 0                          | 1.77                     | 1                       | 2                          | 0                        | 0                       | 0                          | 0                                     | 0                                    | 0                                       |
| 6323651   | ADI1    | 0                          | 0                        | 0                       | 0                          | 7.26                     | 1                       | 2                          | 0                        | 0                       | 0                          | 0                                     | 0                                    | 0                                       |
| 398365629 | DBF2    | 0                          | 0                        | 0                       | 0                          | 2.27                     | 1                       | 2                          | 0                        | 0                       | 0                          | 0                                     | 0                                    | 0                                       |
| 6320725   | GRH1    | 0                          | 0                        | 0                       | 0                          | 3.49                     | 1                       | 2                          | 0                        | 0                       | 0                          | 0                                     | 0                                    | 0                                       |
| 6324056   | TOF1    | 0                          | 0                        | 0                       | 0                          | 1.21                     | 1                       | 1                          | 0                        | 0                       | 0                          | 0                                     | 0                                    | 0                                       |
| 6321823   | PIH1    | 0                          | 0                        | 0                       | 0                          | 6.98                     | 1                       | 2                          | 0                        | 0                       | 0                          | 0                                     | 0                                    | 0                                       |
| 10383767  | KCC4    | 0                          | 0                        | 0                       | 0                          | 1.74                     | 1                       | 1                          | 0                        | 0                       | 0                          | 0                                     | 0                                    | 0                                       |
| 6319556   | UBC4    | 0                          | 0                        | 0                       | 0                          | 18.24                    | 1                       | 1                          | 0                        | 0                       | 0                          | 0                                     | 0                                    | 0                                       |
| 6325007   | GYP5    | 0                          | 0                        | 0                       | 0                          | 2.13                     | 1                       | 1                          | 0                        | 0                       | 0                          | 0                                     | 0                                    | 0                                       |
| 6322121   | SEC6    | 0                          | 0                        | 0                       | 0                          | 1.74                     | 1                       | 1                          | 0                        | 0                       | 0                          | 0                                     | 0                                    | 0                                       |
| 6323292   | TMA7    | 0                          | 0                        | 0                       | 0                          | 17.19                    | 1                       | 1                          | 0                        | 0                       | 0                          | 0                                     | 0                                    | 0                                       |
| 6325227   | TRM44   | 0                          | 0                        | 0                       | 0                          | 2.29                     | 1                       | 2                          | 0                        | 0                       | 0                          | 0                                     | 0                                    | 0                                       |
| 6322526   | TOR1    | 0                          | 0                        | 0                       | 0                          | 0.57                     | 1                       | 1                          | 0                        | 0                       | 0                          | 0                                     | 0                                    | 0                                       |
| 6324085   | SUI1    | 0                          | 0                        | 0                       | 0                          | 25.93                    | 2                       | 4                          | 0                        | 0                       | 0                          | 0                                     | 0                                    | 0                                       |
| 398366199 | IVY1    | 0                          | 4.42                     | 1                       | 1                          | 6.84                     | 2                       | 6                          | 0                        | 0                       | 0                          | 0                                     | 0                                    | 0                                       |
| 6322839   | ARC19   | 0                          | 0                        | 0                       | 0                          | 14.04                    | 2                       | 2                          | 0                        | 0                       | 0                          | 0                                     | 0                                    | 0                                       |
| 6321914   | CIA2    | 0                          | 0                        | 0                       | 0                          | 11.69                    | 2                       | 6                          | 0                        | 0                       | 0                          | 0                                     | 0                                    | 0                                       |
| 6319737   | RGD1    | 0                          | 0                        | 0                       | 0                          | 3.45                     | 2                       | 5                          | 0                        | 0                       | 0                          | 0                                     | 0                                    | 0                                       |
| 6322419   | MHP1    | 0                          | 0                        | 0                       | 0                          | 2.43                     | 2                       | 3                          | 0                        | 0                       | 0                          | 0                                     | 0                                    | 0                                       |
| 398366245 | LDB19   | 0                          | 0                        | 0                       | 0                          | 2.93                     | 2                       | 4                          | 0                        | 0                       | 0                          | 0                                     | 0                                    | 0                                       |
| 6325011   | YPL245W | 0                          | 0                        | 0                       | 0                          | 5.95                     | 2                       | 2                          | 0                        | 0                       | 0                          | 0                                     | 0                                    | 0                                       |
| 398364697 | LSM4    | 0                          | 0                        | 0                       | 0                          | 9.63                     | 2                       | 3                          | 0                        | 0                       | 0                          | 0                                     | 0                                    | 0                                       |
| 6320840   | FMP52   | 26                         | 0                        | 0                       | 0                          | 14.72                    | 3                       | 5                          | 0                        | 0                       | 0                          | 0                                     | 0                                    | 0                                       |
| 6324794   | RCN2    | 0                          | 0                        | 0                       | 0                          | 14.72                    | 3                       | 7                          | 0                        | 0                       | 0                          | 0                                     | 0                                    | 0                                       |
| 6321800   | VPS29   | 0                          | 0                        | 0                       | 0                          | 13.12                    | 3                       | 7                          | 0                        | 0                       | 0                          | 0                                     | 0                                    | 0                                       |
| 398364967 | SOK1    | 0                          | 0                        | 0                       | 0                          | 6.99                     | 3                       | 6                          | 0                        | 0                       | 0                          | 0                                     | 0                                    | 0                                       |
| 6320413   | UME6    | 0                          | 0                        | 0                       | 0                          | 4.43                     | 3                       | 5                          | 0                        | 0                       | 0                          | 0                                     | 0                                    | 0                                       |
| 6322379   | IML2    | 0                          | 0                        | 0                       | 0                          | 4.51                     | 3                       | 3                          | 0                        | 0                       | 0                          | 0                                     | 0                                    | 0                                       |
| 6325362   | COG4    | 0                          | 0                        | 0                       | 0                          | 5.92                     | 3                       | 7                          | 0                        | 0                       | 0                          | 0                                     | 0                                    | 0                                       |
| 6322156   | BCY1    | 0                          | 0                        | 0                       | 0                          | 13.46                    | 4                       | 6                          | 0                        | 0                       | 0                          | 0                                     | 0                                    | 0                                       |
| 6322424   | SNX4    | 0                          | 0                        | 0                       | 0                          | 15.84                    | 4                       | 7                          | 0                        | 0                       | 0                          | 0                                     | 0                                    | 0                                       |
| 398365471 | MCM7    | 0                          | 0                        | 0                       | 0                          | 7.93                     | 4                       | 4                          | 0                        | 0                       | 0                          | 0                                     | 0                                    | 0                                       |
| 398365269 | SMY2    | 0                          | 0                        | 0                       | 0                          | 7.43                     | 4                       | 12                         | 0                        | 0                       | 0                          | 0                                     | 0                                    | 0                                       |
| 6323616   | YML6    | 0                          | 0                        | 0                       | 0                          | 21.33                    | 5                       | 5                          | 0                        | 0                       | 0                          | 0                                     | 0                                    | 0                                       |
| 6325343   | SUA7    | 0                          | 0                        | 0                       | 0                          | 24.93                    | 5                       | 23                         | 0                        | 0                       | 0                          | 0                                     | 0                                    | 0                                       |



Table S1 - Smith-Kinnaman, *et al* (2014) Abbreviations: %SC = percent sequence coverage, UP = unique peptides, PSM = peptide spectrum matches

| Accession | Acronym  | # PSM<br>TAP_Rtr1_<br>WT_1 | %SC<br>TAP_Rtr1_<br>WT_2 | UP<br>TAP_Rtr1_<br>WT_2 | # PSM<br>TAP_Rtr1_<br>WT_2 | %SC<br>TAP_Rtr1_<br>WT_3 | UP<br>TAP_Rtr1_<br>WT_3 | # PSM<br>TAP_Rtr1_<br>WT_3 | %SC<br>TAP_Rtr1_<br>WT_4 | UP<br>TAP_Rtr1_<br>WT_4 | # PSM<br>TAP_Rtr1_<br>WT_4 | %SC<br>TAP_Rtr1_<br>ctk1_del<br>etion | UP<br>TAP_Rtr1_<br>ctk1_del<br>etion | # PSM<br>TAP_Rtr1_<br>ctk1_del<br>etion |
|-----------|----------|----------------------------|--------------------------|-------------------------|----------------------------|--------------------------|-------------------------|----------------------------|--------------------------|-------------------------|----------------------------|---------------------------------------|--------------------------------------|-----------------------------------------|
| 6320490   | DPP1     | 0                          | 0                        | 0                       | 0                          | 0                        | 0                       | 0                          | 0                        | 0                       | 0                          | 0                                     | 0                                    | 0                                       |
| 6321749   | CBP2     | 0                          | 0                        | 0                       | 0                          | 0                        | 0                       | 0                          | 0                        | 0                       | 0                          | 0                                     | 0                                    | 0                                       |
| 6323230   | COQ9     | 0                          | 0                        | 0                       | 0                          | 0                        | 0                       | 0                          | 0                        | 0                       | 0                          | 0                                     | 0                                    | 0                                       |
| 6323020   | COX17    | 0                          | 0                        | 0                       | 0                          | 0                        | 0                       | 0                          | 0                        | 0                       | 0                          | 0                                     | 0                                    | 0                                       |
| 6325319   | FCY1     | 0                          | 0                        | 0                       | 0                          | 0                        | 0                       | 0                          | 0                        | 0                       | 0                          | 0                                     | 0                                    | 0                                       |
| 6323523   | DAT1     | 0                          | 0                        | 0                       | 0                          | 0                        | 0                       | 0                          | 0                        | 0                       | 0                          | 0                                     | 0                                    | 0                                       |
| 330443382 | DEP1     | 0                          | 0                        | 0                       | 0                          | 0                        | 0                       | 0                          | 0                        | 0                       | 0                          | 0                                     | 0                                    | 0                                       |
| 6322633   | URA1     | 0                          | 0                        | 0                       | 0                          | 0                        | 0                       | 0                          | 0                        | 0                       | 0                          | 0                                     | 0                                    | 0                                       |
| 6322657   | DPH2     | 0                          | 0                        | 0                       | 0                          | 0                        | 0                       | 0                          | 0                        | 0                       | 0                          | 0                                     | 0                                    | 0                                       |
| 6321200   | HAP2     | 0                          | 0                        | 0                       | 0                          | 0                        | 0                       | 0                          | 0                        | 0                       | 0                          | 0                                     | 0                                    | 0                                       |
| 9755326   | YBR085C- | 0                          | 0                        | 0                       | 0                          | 0                        | 0                       | 0                          | 0                        | 0                       | 0                          | 0                                     | 0                                    | 0                                       |
| 42759851  | YCL012C  | 0                          | 0                        | 0                       | 0                          | 0                        | 0                       | 0                          | 0                        | 0                       | 0                          | 0                                     | 0                                    | 0                                       |
| 6323669   | YMR027   | 0                          | 0                        | 0                       | 0                          | 0                        | 0                       | 0                          | 0                        | 0                       | 0                          | 0                                     | 0                                    | 0                                       |
| 398365291 | ACB1     | 0                          | 0                        | 0                       | 0                          | 0                        | 0                       | 0                          | 0                        | 0                       | 0                          | 0                                     | 0                                    | 0                                       |
| 6323941   | NGL2     | 0                          | 0                        | 0                       | 0                          | 0                        | 0                       | 0                          | 0                        | 0                       | 0                          | 0                                     | 0                                    | 0                                       |
| 6323177   | PEP3     | 0                          | 0                        | 0                       | 0                          | 0                        | 0                       | 0                          | 0                        | 0                       | 0                          | 0                                     | 0                                    | 0                                       |
| 6324678   | PIN2     | 0                          | 0                        | 0                       | 0                          | 0                        | 0                       | 0                          | 0                        | 0                       | 0                          | 0                                     | 0                                    | 0                                       |
| 14318491  | CAF16    | 0                          | 0                        | 0                       | 0                          | 0                        | 0                       | 0                          | 0                        | 0                       | 0                          | 0                                     | 0                                    | 0                                       |
| 398365407 | RCM1     | 0                          | 0                        | 0                       | 0                          | 0                        | 0                       | 0                          | 0                        | 0                       | 0                          | 0                                     | 0                                    | 0                                       |
| 398364993 | RPN14    | 0                          | 0                        | 0                       | 0                          | 0                        | 0                       | 0                          | 0                        | 0                       | 0                          | 0                                     | 0                                    | 0                                       |
| 6324072   | SIP3     | 0                          | 0                        | 0                       | 0                          | 0                        | 0                       | 0                          | 0                        | 0                       | 0                          | 0                                     | 0                                    | 0                                       |
| 6324655   | TGL5     | 0                          | 0                        | 0                       | 0                          | 0                        | 0                       | 0                          | 0                        | 0                       | 0                          | 0                                     | 0                                    | 0                                       |
| 398366623 | TLG1     | 0                          | 0                        | 0                       | 0                          | 0                        | 0                       | 0                          | 0                        | 0                       | 0                          | 0                                     | 0                                    | 0                                       |
| 6320100   | QRI1     | 0                          | 0                        | 0                       | 0                          | 0                        | 0                       | 0                          | 0                        | 0                       | 0                          | 0                                     | 0                                    | 0                                       |
| 6321226   | VAM7     | 0                          | 0                        | 0                       | 0                          | 0                        | 0                       | 0                          | 0                        | 0                       | 0                          | 0                                     | 0                                    | 0                                       |
| 6322459   | PRE3     | 0                          | 0                        | 0                       | 0                          | 0                        | 0                       | 0                          | 0                        | 0                       | 0                          | 0                                     | 0                                    | 0                                       |
| 6322083   | YIL108W  | 0                          | 0                        | 0                       | 0                          | 0                        | 0                       | 0                          | 0                        | 0                       | 0                          | 0                                     | 0                                    | 0                                       |
| 398366489 | UTP4     | 0                          | 0                        | 0                       | 0                          | 0                        | 0                       | 0                          | 0                        | 0                       | 0                          | 0                                     | 0                                    | 0                                       |
| 6325194   | TIM50    | 0                          | 0                        | 0                       | 0                          | 0                        | 0                       | 0                          | 0                        | 0                       | 0                          | 0                                     | 0                                    | 0                                       |
| 398365181 | HOC1     | 0                          | 0                        | 0                       | 0                          | 0                        | 0                       | 0                          | 0                        | 0                       | 0                          | 0                                     | 0                                    | 0                                       |
| 6320380   | RSM24    | 0                          | 0                        | 0                       | 0                          | 0                        | 0                       | 0                          | 0                        | 0                       | 0                          | 0                                     | 0                                    | 0                                       |
| 330443750 | YPR097W  | 0                          | 0                        | 0                       | 0                          | 4.01                     | 2                       | 5                          | 1.58                     | 1                       | 1                          | 0                                     | 0                                    | 0                                       |
| 6324984   | ATP15    | 1                          | 0                        | 0                       | 0                          | 27.42                    | 1                       | 1                          | 0                        | 0                       | 0                          | 0                                     | 0                                    | 0                                       |
| 6323999   | RPD3     | 0                          | 0                        | 0                       | 0                          | 3.70                     | 1                       | 1                          | 0                        | 0                       | 0                          | 0                                     | 0                                    | 0                                       |
| 6320974   | LCP5     | 0                          | 0                        | 0                       | 0                          | 5.04                     | 1                       | 1                          | 0                        | 0                       | 0                          | 0                                     | 0                                    | 0                                       |
| 6324552   | DIS3     | 0                          | 0                        | 0                       | 0                          | 1.60                     | 1                       | 3                          | 0                        | 0                       | 0                          | 0                                     | 0                                    | 0                                       |
| 398365639 | PBP2     | 0                          | 0                        | 0                       | 0                          | 3.39                     | 1                       | 5                          | 0                        | 0                       | 0                          | 0                                     | 0                                    | 0                                       |









Table S1 - Smith-Kinnaman, *et al* (2014) Abbreviations: %SC = percent sequence coverage, UP = unique peptides, PSM = peptide spectrum matches

| Accession | Acronym | # PSM<br>TAP_Rtr1_<br>WT_1 | %SC<br>TAP_Rtr1_<br>WT_2 | UP<br>TAP_Rtr1_<br>WT_2 | # PSM<br>TAP_Rtr1_<br>WT_2 | %SC<br>TAP_Rtr1_<br>WT_3 | UP<br>TAP_Rtr1_<br>WT_3 | # PSM<br>TAP_Rtr1_<br>WT_3 | %SC<br>TAP_Rtr1_<br>WT_4 | UP<br>TAP_Rtr1_<br>WT_4 | # PSM<br>TAP_Rtr1_<br>WT_4 | %SC<br>TAP_Rtr1_<br>ctk1_del<br>etion | UP<br>TAP_Rtr1_<br>ctk1_del<br>etion | # PSM<br>TAP_Rtr1_<br>ctk1_del<br>etion |
|-----------|---------|----------------------------|--------------------------|-------------------------|----------------------------|--------------------------|-------------------------|----------------------------|--------------------------|-------------------------|----------------------------|---------------------------------------|--------------------------------------|-----------------------------------------|
| 6325146   | CAR1    | 0                          | 0                        | 0                       | 0                          | 0                        | 0                       | 0                          | 0                        | 0                       | 0                          | 0                                     | 0                                    | 0                                       |
| 6319895   | BUD23   | 0                          | 0                        | 0                       | 0                          | 0                        | 0                       | 0                          | 0                        | 0                       | 0                          | 0                                     | 0                                    | 0                                       |
| 398365793 | SHM1    | 2                          | 0                        | 0                       | 0                          | 2.86                     | 1                       | 3                          | 0                        | 0                       | 0                          | 0                                     | 0                                    | 0                                       |
| 398365279 | ADE2    | 0                          | 0                        | 0                       | 0                          | 2.28                     | 1                       | 1                          | 0                        | 0                       | 0                          | 0                                     | 0                                    | 0                                       |
| 6322564   | SOD1    | 1                          | 0                        | 0                       | 0                          | 6.49                     | 1                       | 1                          | 0                        | 0                       | 0                          | 0                                     | 0                                    | 0                                       |
| 6323931   | BUL1    | 0                          | 0                        | 0                       | 0                          | 2.36                     | 1                       | 1                          | 0                        | 0                       | 0                          | 0                                     | 0                                    | 0                                       |
| 6322714   | APL2    | 0                          | 0                        | 0                       | 0                          | 4.96                     | 3                       | 5                          | 0                        | 0                       | 0                          | 0                                     | 0                                    | 0                                       |
| 398365723 | DPB4    | 0                          | 0                        | 0                       | 0                          | 0                        | 0                       | 0                          | 0                        | 0                       | 0                          | 0                                     | 0                                    | 0                                       |
| 6324250   | TPM1    | 0                          | 0                        | 0                       | 0                          | 0                        | 0                       | 0                          | 0                        | 0                       | 0                          | 0                                     | 0                                    | 0                                       |
| 6324382   | ESF2    | 0                          | 0                        | 0                       | 0                          | 0                        | 0                       | 0                          | 0                        | 0                       | 0                          | 0                                     | 0                                    | 0                                       |
| 398364299 | NOP16   | 1                          | 0                        | 0                       | 0                          | 0                        | 0                       | 0                          | 0                        | 0                       | 0                          | 0                                     | 0                                    | 0                                       |
| 398364461 | HMF1    | 0                          | 0                        | 0                       | 0                          | 0                        | 0                       | 0                          | 0                        | 0                       | 0                          | 0                                     | 0                                    | 0                                       |
| 330443644 | APE2    | 0                          | 0                        | 0                       | 0                          | 0                        | 0                       | 0                          | 0                        | 0                       | 0                          | 0                                     | 0                                    | 0                                       |
| 6323951   | JNM1    | 0                          | 0                        | 0                       | 0                          | 0                        | 0                       | 0                          | 0                        | 0                       | 0                          | 0                                     | 0                                    | 0                                       |
| 6323103   | BUD20   | 1                          | 0                        | 0                       | 0                          | 7.23                     | 1                       | 1                          | 0                        | 0                       | 0                          | 0                                     | 0                                    | 0                                       |
| 6324245   | END3    | 2                          | 0                        | 0                       | 0                          | 29.51                    | 6                       | 23                         | 0                        | 0                       | 0                          | 0                                     | 0                                    | 0                                       |
| 398365535 | GLN4    | 4                          | 0                        | 0                       | 0                          | 0                        | 0                       | 0                          | 0                        | 0                       | 0                          | 0                                     | 0                                    | 0                                       |
| 6321829   | VMA10   | 0                          | 0                        | 0                       | 0                          | 9.65                     | 1                       | 2                          | 0                        | 0                       | 0                          | 0                                     | 0                                    | 0                                       |
| 6323340   | IMH1    | 0                          | 0                        | 0                       | 0                          | 16.25                    | 11                      | 17                         | 0                        | 0                       | 0                          | 0                                     | 0                                    | 0                                       |
| 330443364 | ECM1    | 0                          | 0                        | 0                       | 0                          | 0                        | 0                       | 0                          | 0                        | 0                       | 0                          | 0                                     | 0                                    | 0                                       |
| 6324601   | STI1    | 2                          | 0                        | 0                       | 0                          | 3.06                     | 1                       | 1                          | 0                        | 0                       | 0                          | 0                                     | 0                                    | 0                                       |
| 6321563   | ASN2    | 2                          | 0                        | 0                       | 0                          | 0                        | 0                       | 0                          | 0                        | 0                       | 0                          | 0                                     | 0                                    | 0                                       |
| 6323779   | RRB1    | 0                          | 0                        | 0                       | 0                          | 0                        | 0                       | 0                          | 0                        | 0                       | 0                          | 0                                     | 0                                    | 0                                       |
| 6320306   | ARX1    | 1                          | 0                        | 0                       | 0                          | 3.04                     | 1                       | 2                          | 0                        | 0                       | 0                          | 5.40                                  | 1                                    | 1                                       |
| 398365749 | MTC5    | 0                          | 0                        | 0                       | 0                          | 0                        | 0                       | 0                          | 0                        | 0                       | 0                          | 0                                     | 0                                    | 0                                       |
| 6320152   | LHP1    | 0                          | 0                        | 0                       | 0                          | 0                        | 0                       | 0                          | 0                        | 0                       | 0                          | 0                                     | 0                                    | 0                                       |
| 6319926   | TUP1    | 0                          | 0                        | 0                       | 0                          | 3.23                     | 2                       | 4                          | 0                        | 0                       | 0                          | 0                                     | 0                                    | 0                                       |
| 398364983 | EGD2    | 8                          | 0                        | 0                       | 0                          | 20.69                    | 2                       | 5                          | 0                        | 0                       | 0                          | 7.47                                  | 1                                    | 1                                       |
| 398366421 | GDH1    | 1                          | 0                        | 0                       | 0                          | 10.79                    | 3                       | 3                          | 0                        | 0                       | 0                          | 0                                     | 0                                    | 0                                       |
| 6325421   | TIF3    | 0                          | 0                        | 0                       | 0                          | 0                        | 0                       | 0                          | 0                        | 0                       | 0                          | 0                                     | 0                                    | 0                                       |
| 339046261 | NHP6BP  | 0                          | 0                        | 0                       | 0                          | 13.13                    | 1                       | 1                          | 0                        | 0                       | 0                          | 0                                     | 0                                    | 0                                       |
| 6325229   | ERG10   | 0                          | 0                        | 0                       | 0                          | 9.80                     | 3                       | 3                          | 0                        | 0                       | 0                          | 0                                     | 0                                    | 0                                       |
| 398366043 | CAF20   | 0                          | 0                        | 0                       | 0                          | 42.86                    | 3                       | 9                          | 0                        | 0                       | 0                          | 0                                     | 0                                    | 0                                       |
| 6325014   | IQG1    | 0                          | 0                        | 0                       | 0                          | 1.40                     | 1                       | 1                          | 0                        | 0                       | 0                          | 0.54                                  | 1                                    | 2                                       |
| 398365281 | BUD4    | 0                          | 0                        | 0                       | 0                          | 0.76                     | 1                       | 2                          | 0                        | 0                       | 0                          | 0.83                                  | 1                                    | 1                                       |
| 398365669 | TEL2    | 0                          | 0                        | 0                       | 0                          | 0                        | 0                       | 0                          | 0                        | 0                       | 0                          | 1.02                                  | 1                                    | 1                                       |
| 10383780  | ADP1    | 0                          | 0                        | 0                       | 0                          | 0                        | 0                       | 0                          | 0                        | 0                       | 0                          | 1.05                                  | 1                                    | 1                                       |

Table S1 - Smith-Kinnaman, *et al* (2014) Abbreviations: %SC = percent sequence coverage, UP = unique peptides, PSM = peptide spectrum matches

| Accession | Acronym  | # PSM<br>TAP_Rtr1_<br>WT_1 | %SC<br>TAP_Rtr1_<br>WT_2 | UP<br>TAP_Rtr1_<br>WT_2 | # PSM<br>TAP_Rtr1_<br>WT_2 | %SC<br>TAP_Rtr1_<br>WT_3 | UP<br>TAP_Rtr1_<br>WT_3 | # PSM<br>TAP_Rtr1_<br>WT_3 | %SC<br>TAP_Rtr1_<br>WT_4 | UP<br>TAP_Rtr1_<br>WT_4 | # PSM<br>TAP_Rtr1_<br>WT_4 | %SC<br>TAP_Rtr1_<br>ctk1_del<br>etion | UP<br>TAP_Rtr1_<br>ctk1_del<br>etion | # PSM<br>TAP_Rtr1_<br>ctk1_del<br>etion |
|-----------|----------|----------------------------|--------------------------|-------------------------|----------------------------|--------------------------|-------------------------|----------------------------|--------------------------|-------------------------|----------------------------|---------------------------------------|--------------------------------------|-----------------------------------------|
| 6323181   | YLR152C  | 0                          | 0                        | 0                       | 0                          | 0                        | 0                       | 0                          | 0                        | 0                       | 0                          | 1.22                                  | 1                                    | 1                                       |
| 6323217   | MDL1     | 0                          | 0                        | 0                       | 0                          | 0                        | 0                       | 0                          | 0                        | 0                       | 0                          | 1.44                                  | 1                                    | 1                                       |
| 6321439   | SWC4     | 0                          | 0                        | 0                       | 0                          | 3.78                     | 1                       | 3                          | 0                        | 0                       | 0                          | 1.68                                  | 1                                    | 1                                       |
| 6325116   | FRK1     | 0                          | 0                        | 0                       | 0                          | 0                        | 0                       | 0                          | 0                        | 0                       | 0                          | 1.97                                  | 1                                    | 1                                       |
| 6321223   | CLG1     | 0                          | 0                        | 0                       | 0                          | 0                        | 0                       | 0                          | 0                        | 0                       | 0                          | 2.21                                  | 1                                    | 1                                       |
| 398364759 | PRP40    | 0                          | 0                        | 0                       | 0                          | 0                        | 0                       | 0                          | 0                        | 0                       | 0                          | 2.23                                  | 1                                    | 1                                       |
| 330443403 | TEL1     | 0                          | 0                        | 0                       | 0                          | 0                        | 0                       | 0                          | 0                        | 0                       | 0                          | 2.26                                  | 2                                    | 2                                       |
| 6323724   | CTF18    | 0                          | 0                        | 0                       | 0                          | 0                        | 0                       | 0                          | 0                        | 0                       | 0                          | 2.43                                  | 1                                    | 1                                       |
| 6324482   | MSH2     | 0                          | 0                        | 0                       | 0                          | 0                        | 0                       | 0                          | 0                        | 0                       | 0                          | 2.90                                  | 1                                    | 1                                       |
| 6322471   | YJR011C  | 0                          | 0                        | 0                       | 0                          | 0                        | 0                       | 0                          | 0                        | 0                       | 0                          | 3.07                                  | 1                                    | 17                                      |
| 6322075   | HIS5     | 1                          | 0                        | 0                       | 0                          | 12.21                    | 4                       | 7                          | 0                        | 0                       | 0                          | 3.64                                  | 1                                    | 1                                       |
| 6323435   | SFP1     | 0                          | 0                        | 0                       | 0                          | 10.10                    | 3                       | 6                          | 0                        | 0                       | 0                          | 5.27                                  | 1                                    | 1                                       |
| 330443407 | PET112   | 0                          | 0                        | 0                       | 0                          | 0                        | 0                       | 0                          | 0                        | 0                       | 0                          | 5.91                                  | 1                                    | 1                                       |
| 6325210   | SGF11    | 0                          | 0                        | 0                       | 0                          | 0                        | 0                       | 0                          | 0                        | 0                       | 0                          | 7.07                                  | 1                                    | 1                                       |
| 6320137   | IDP1     | 0                          | 0                        | 0                       | 0                          | 2.57                     | 1                       | 1                          | 0                        | 0                       | 0                          | 8.41                                  | 3                                    | 3                                       |
| 6323640   | YML003W  | 0                          | 0                        | 0                       | 0                          | 0                        | 0                       | 0                          | 0                        | 0                       | 0                          | 10.69                                 | 1                                    | 1                                       |
| 6321215   | COG1     | 0                          | 0                        | 0                       | 0                          | 2.88                     | 1                       | 1                          | 0                        | 0                       | 0                          | 11.51                                 | 2                                    | 2                                       |
| 6323826   | DDR48    | 0                          | 0                        | 0                       | 0                          | 0                        | 0                       | 0                          | 0                        | 0                       | 0                          | 22.33                                 | 3                                    | 4                                       |
| 398365503 | RSF2     | 0                          | 0                        | 0                       | 0                          | 0.80                     | 1                       | 2                          | 0.43                     | 1                       | 1                          | 0                                     | 0                                    | 0                                       |
| 398366065 | VAC14    | 0                          | 0                        | 0                       | 0                          | 2.27                     | 1                       | 1                          | 2.16                     | 1                       | 1                          | 0                                     | 0                                    | 0                                       |
| 398365047 | DAS2     | 0                          | 0                        | 0                       | 0                          | 13.79                    | 2                       | 2                          | 8.19                     | 1                       | 1                          | 0                                     | 0                                    | 0                                       |
| 6324235   | APP1     | 0                          | 0                        | 0                       | 0                          | 9.54                     | 3                       | 3                          | 1.02                     | 1                       | 1                          | 0                                     | 0                                    | 0                                       |
| 6321557   | NUP57    | 1                          | 0                        | 0                       | 0                          | 7.58                     | 4                       | 6                          | 1.85                     | 1                       | 1                          | 0                                     | 0                                    | 0                                       |
| 6320775   | PRB1     | 0                          | 0                        | 0                       | 0                          | 0                        | 0                       | 0                          | 2.05                     | 1                       | 1                          | 0                                     | 0                                    | 0                                       |
| 6325212   | VPS16    | 0                          | 0                        | 0                       | 0                          | 0                        | 0                       | 0                          | 1.75                     | 1                       | 1                          | 0                                     | 0                                    | 0                                       |
| 6321418   | GET1     | 0                          | 0                        | 0                       | 0                          | 0                        | 0                       | 0                          | 2.98                     | 1                       | 1                          | 0                                     | 0                                    | 0                                       |
| 6323517   | NGL3     | 0                          | 0                        | 0                       | 0                          | 0                        | 0                       | 0                          | 1.98                     | 1                       | 3                          | 0                                     | 0                                    | 0                                       |
| 6325228   | SUV3     | 0                          | 0                        | 0                       | 0                          | 0                        | 0                       | 0                          | 1.22                     | 1                       | 1                          | 0                                     | 0                                    | 0                                       |
| 398364413 | PCL7     | 0                          | 0                        | 0                       | 0                          | 0                        | 0                       | 0                          | 4.21                     | 1                       | 2                          | 0                                     | 0                                    | 0                                       |
| 6322556   | YJR096W  | 0                          | 0                        | 0                       | 0                          | 0                        | 0                       | 0                          | 11.35                    | 1                       | 1                          | 0                                     | 0                                    | 0                                       |
| 6322804   | ANR2     | 0                          | 0                        | 0                       | 0                          | 0                        | 0                       | 0                          | 1.94                     | 1                       | 1                          | 0                                     | 0                                    | 0                                       |
| 6323271   | ARV1     | 0                          | 0                        | 0                       | 0                          | 0                        | 0                       | 0                          | 10.90                    | 1                       | 1                          | 0                                     | 0                                    | 0                                       |
| 6324506   | RIB2     | 0                          | 0                        | 0                       | 0                          | 0                        | 0                       | 0                          | 3.05                     | 1                       | 1                          | 0                                     | 0                                    | 0                                       |
| 6320046   | CLB3     | 0                          | 0                        | 0                       | 0                          | 0                        | 0                       | 0                          | 3.51                     | 1                       | 1                          | 0                                     | 0                                    | 0                                       |
| 82795250  | YGL194C- | 0                          | 0                        | 0                       | 0                          | 0                        | 0                       | 0                          | 26.25                    | 1                       | 1                          | 0                                     | 0                                    | 0                                       |
| 398365389 | YGR053C  | 0                          | 0                        | 0                       | 0                          | 0                        | 0                       | 0                          | 3.18                     | 1                       | 1                          | 0                                     | 0                                    | 0                                       |
| 33438858  | YMR230   | 0                          | 0                        | 0                       | 0                          | 0                        | 0                       | 0                          | 20.97                    | 1                       | 1                          | 0                                     | 0                                    | 0                                       |

Table S1 - Smith-Kinnaman, *et al* (2014) Abbreviations: %SC = percent sequence coverage, UP = unique peptides, PSM = peptide spectrum matches

| Accession | Acronym | # PSM<br>TAP_Rtr1_<br>WT_1 | %SC<br>TAP_Rtr1_<br>WT_2 | UP<br>TAP_Rtr1_<br>WT_2 | # PSM<br>TAP_Rtr1_<br>WT_2 | %SC<br>TAP_Rtr1_<br>WT_3 | UP<br>TAP_Rtr1_<br>WT_3 | # PSM<br>TAP_Rtr1_<br>WT_3 | %SC<br>TAP_Rtr1_<br>WT_4 | UP<br>TAP_Rtr1_<br>WT_4 | # PSM<br>TAP_Rtr1_<br>WT_4 | %SC<br>TAP_Rtr1_<br>ctk1_del<br>etion | UP<br>TAP_Rtr1_<br>ctk1_del<br>etion | # PSM<br>TAP_Rtr1_<br>ctk1_del<br>etion |
|-----------|---------|----------------------------|--------------------------|-------------------------|----------------------------|--------------------------|-------------------------|----------------------------|--------------------------|-------------------------|----------------------------|---------------------------------------|--------------------------------------|-----------------------------------------|
| 6325279   | YPRO22C | 0                          | 0                        | 0                       | 0                          | 0                        | 0                       | 0                          | 0.79                     | 1                       | 1                          | 0                                     | 0                                    | 0                                       |
| 6321028   | ISC10   | 0                          | 0                        | 0                       | 0                          | 0                        | 0                       | 0                          | 3.75                     | 1                       | 1                          | 0                                     | 0                                    | 0                                       |
| 6321274   | YRB30   | 0                          | 0                        | 0                       | 0                          | 0                        | 0                       | 0                          | 1.59                     | 1                       | 1                          | 0                                     | 0                                    | 0                                       |
| 6324519   | AIM39   | 0                          | 0                        | 0                       | 0                          | 0                        | 0                       | 0                          | 2.78                     | 1                       | 1                          | 0                                     | 0                                    | 0                                       |
| 6322658   | CNB1    | 3                          | 0                        | 0                       | 0                          | 10.29                    | 1                       | 2                          | 0                        | 0                       | 0                          | 0                                     | 0                                    | 0                                       |
| 10383760  | LSB5    | 0                          | 0                        | 0                       | 0                          | 6.50                     | 1                       | 1                          | 0                        | 0                       | 0                          | 0                                     | 0                                    | 0                                       |
| 398364999 | CKS1    | 0                          | 0                        | 0                       | 0                          | 10.00                    | 1                       | 1                          | 0                        | 0                       | 0                          | 0                                     | 0                                    | 0                                       |
| 398366627 | TRS31   | 0                          | 0                        | 0                       | 0                          | 8.83                     | 1                       | 1                          | 0                        | 0                       | 0                          | 0                                     | 0                                    | 0                                       |
| 6324672   | NUP1    | 11                         | 0                        | 0                       | 0                          | 1.21                     | 1                       | 1                          | 0                        | 0                       | 0                          | 0                                     | 0                                    | 0                                       |
| 6323031   | CMS1    | 0                          | 0                        | 0                       | 0                          | 5.15                     | 1                       | 6                          | 0                        | 0                       | 0                          | 0                                     | 0                                    | 0                                       |
| 6323287   | GSY2    | 0                          | 0                        | 0                       | 0                          | 2.70                     | 1                       | 1                          | 0                        | 0                       | 0                          | 0                                     | 0                                    | 0                                       |
| 6323425   | ATP10   | 0                          | 0                        | 0                       | 0                          | 7.53                     | 1                       | 3                          | 0                        | 0                       | 0                          | 0                                     | 0                                    | 0                                       |
| 398365917 | RSR1    | 0                          | 0                        | 0                       | 0                          | 4.04                     | 1                       | 2                          | 0                        | 0                       | 0                          | 0                                     | 0                                    | 0                                       |
| 6321849   | MED6    | 0                          | 0                        | 0                       | 0                          | 5.42                     | 1                       | 7                          | 0                        | 0                       | 0                          | 0                                     | 0                                    | 0                                       |
| 6322281   | ATP12   | 0                          | 0                        | 0                       | 0                          | 3.69                     | 1                       | 5                          | 0                        | 0                       | 0                          | 0                                     | 0                                    | 0                                       |
| 6319867   | MAK31   | 0                          | 0                        | 0                       | 0                          | 10.23                    | 1                       | 4                          | 0                        | 0                       | 0                          | 0                                     | 0                                    | 0                                       |
| 6321785   | HSE1    | 0                          | 0                        | 0                       | 0                          | 3.54                     | 1                       | 4                          | 0                        | 0                       | 0                          | 0                                     | 0                                    | 0                                       |
| 6325087   | DAP1    | 0                          | 0                        | 0                       | 0                          | 8.55                     | 1                       | 2                          | 0                        | 0                       | 0                          | 0                                     | 0                                    | 0                                       |
| 6324502   | NBA1    | 0                          | 0                        | 0                       | 0                          | 3.99                     | 1                       | 1                          | 0                        | 0                       | 0                          | 0                                     | 0                                    | 0                                       |
| 6323019   | PSR1    | 0                          | 0                        | 0                       | 0                          | 3.04                     | 1                       | 7                          | 0                        | 0                       | 0                          | 0                                     | 0                                    | 0                                       |
| 398364635 | IXR1    | 7                          | 0                        | 0                       | 0                          | 1.84                     | 1                       | 2                          | 0                        | 0                       | 0                          | 0                                     | 0                                    | 0                                       |
| 6322996   | YLL032C | 0                          | 0                        | 0                       | 0                          | 1.70                     | 1                       | 4                          | 0                        | 0                       | 0                          | 0                                     | 0                                    | 0                                       |
| 6323533   | NUP188  | 0                          | 0                        | 0                       | 0                          | 0.91                     | 1                       | 3                          | 0                        | 0                       | 0                          | 0                                     | 0                                    | 0                                       |
| 6322337   | LSM1    | 0                          | 0                        | 0                       | 0                          | 9.30                     | 1                       | 2                          | 0                        | 0                       | 0                          | 0                                     | 0                                    | 0                                       |
| 6321906   | BZZ1    | 0                          | 0                        | 0                       | 0                          | 2.84                     | 1                       | 2                          | 0                        | 0                       | 0                          | 0                                     | 0                                    | 0                                       |
| 6320163   | SIR2    | 0                          | 0                        | 0                       | 0                          | 3.38                     | 1                       | 5                          | 0                        | 0                       | 0                          | 0                                     | 0                                    | 0                                       |
| 398364637 | PRS2    | 0                          | 0                        | 0                       | 0                          | 5.03                     | 1                       | 2                          | 0                        | 0                       | 0                          | 0                                     | 0                                    | 0                                       |
| 398364293 | FMC1    | 4                          | 0                        | 0                       | 0                          | 6.45                     | 1                       | 1                          | 0                        | 0                       | 0                          | 0                                     | 0                                    | 0                                       |
| 6325113   | POC4    | 0                          | 0                        | 0                       | 0                          | 10.14                    | 1                       | 1                          | 0                        | 0                       | 0                          | 0                                     | 0                                    | 0                                       |
| 6323162   | CKI1    | 0                          | 0                        | 0                       | 0                          | 1.89                     | 1                       | 1                          | 0                        | 0                       | 0                          | 0                                     | 0                                    | 0                                       |
| 6320127   | RXT3    | 0                          | 0                        | 0                       | 0                          | 3.40                     | 1                       | 1                          | 0                        | 0                       | 0                          | 0                                     | 0                                    | 0                                       |
| 330443546 | MDS3    | 0                          | 0                        | 0                       | 0                          | 1.08                     | 1                       | 4                          | 0                        | 0                       | 0                          | 0                                     | 0                                    | 0                                       |
| 398366201 | ATG17   | 0                          | 0                        | 0                       | 0                          | 2.88                     | 1                       | 2                          | 0                        | 0                       | 0                          | 0                                     | 0                                    | 0                                       |
| 6324934   | HAP5    | 0                          | 0                        | 0                       | 0                          | 4.96                     | 1                       | 2                          | 0                        | 0                       | 0                          | 0                                     | 0                                    | 0                                       |
| 398364577 | DOT6    | 0                          | 0                        | 0                       | 0                          | 1.79                     | 1                       | 1                          | 0                        | 0                       | 0                          | 0                                     | 0                                    | 0                                       |
| 6324023   | YMS18   | 0                          | 0                        | 0                       | 0                          | 5.07                     | 1                       | 1                          | 0                        | 0                       | 0                          | 0                                     | 0                                    | 0                                       |
| 37362669  | ESS1    | 0                          | 0                        | 0                       | 0                          | 8.82                     | 1                       | 1                          | 0                        | 0                       | 0                          | 0                                     | 0                                    | 0                                       |

Table S1 - Smith-Kinnaman, *et al* (2014) Abbreviations: %SC = percent sequence coverage, UP = unique peptides, PSM = peptide spectrum matches

| Accession | Acronym | # PSM<br>TAP_Rtr1_<br>WT_1 | %SC<br>TAP_Rtr1_<br>WT_2 | UP<br>TAP_Rtr1_<br>WT_2 | # PSM<br>TAP_Rtr1_<br>WT_2 | %SC<br>TAP_Rtr1_<br>WT_3 | UP<br>TAP_Rtr1_<br>WT_3 | # PSM<br>TAP_Rtr1_<br>WT_3 | %SC<br>TAP_Rtr1_<br>WT_4 | UP<br>TAP_Rtr1_<br>WT_4 | # PSM<br>TAP_Rtr1_<br>WT_4 | %SC<br>TAP_Rtr1_<br>ctk1_del<br>etion | UP<br>TAP_Rtr1_<br>ctk1_del<br>etion | # PSM<br>TAP_Rtr1_<br>ctk1_del<br>etion |
|-----------|---------|----------------------------|--------------------------|-------------------------|----------------------------|--------------------------|-------------------------|----------------------------|--------------------------|-------------------------|----------------------------|---------------------------------------|--------------------------------------|-----------------------------------------|
| 6320537   | UBX5    | 0                          | 0                        | 0                       | 0                          | 2.40                     | 1                       | 1                          | 0                        | 0                       | 0                          | 0                                     | 0                                    | 0                                       |
| 398366051 | REF2    | 0                          | 0                        | 0                       | 0                          | 2.63                     | 1                       | 1                          | 0                        | 0                       | 0                          | 0                                     | 0                                    | 0                                       |
| 93117371  | PEX19   | 0                          | 0                        | 0                       | 0                          | 4.68                     | 1                       | 1                          | 0                        | 0                       | 0                          | 0                                     | 0                                    | 0                                       |
| 6323146   | CLF1    | 0                          | 0                        | 0                       | 0                          | 2.04                     | 1                       | 5                          | 0                        | 0                       | 0                          | 0                                     | 0                                    | 0                                       |
| 6322990   | ENT4    | 0                          | 0                        | 0                       | 0                          | 5.67                     | 1                       | 5                          | 0                        | 0                       | 0                          | 0                                     | 0                                    | 0                                       |
| 6320990   | MAG1    | 0                          | 0                        | 0                       | 0                          | 6.42                     | 1                       | 5                          | 0                        | 0                       | 0                          | 0                                     | 0                                    | 0                                       |
| 398365849 | EKI1    | 0                          | 0                        | 0                       | 0                          | 1.69                     | 1                       | 4                          | 0                        | 0                       | 0                          | 0                                     | 0                                    | 0                                       |
| 6322662   | MTR2    | 0                          | 0                        | 0                       | 0                          | 9.24                     | 1                       | 3                          | 0                        | 0                       | 0                          | 0                                     | 0                                    | 0                                       |
| 6320507   | CFT1    | 0                          | 0                        | 0                       | 0                          | 1.33                     | 1                       | 3                          | 0                        | 0                       | 0                          | 0                                     | 0                                    | 0                                       |
| 6325155   | ELP4    | 1                          | 0                        | 0                       | 0                          | 2.41                     | 1                       | 2                          | 0                        | 0                       | 0                          | 0                                     | 0                                    | 0                                       |
| 6319894   | IMG1    | 0                          | 0                        | 0                       | 0                          | 9.47                     | 1                       | 2                          | 0                        | 0                       | 0                          | 0                                     | 0                                    | 0                                       |
| 6321705   | YGR266W | 0                          | 0                        | 0                       | 0                          | 1.43                     | 1                       | 2                          | 0                        | 0                       | 0                          | 0                                     | 0                                    | 0                                       |
| 14318554  | SMC2    | 0                          | 0                        | 0                       | 0                          | 1.45                     | 1                       | 2                          | 0                        | 0                       | 0                          | 0                                     | 0                                    | 0                                       |
| 398366369 | VTS1    | 0                          | 0                        | 0                       | 0                          | 4.02                     | 1                       | 1                          | 0                        | 0                       | 0                          | 0                                     | 0                                    | 0                                       |
| 6325307   | MAK3    | 0                          | 0                        | 0                       | 0                          | 9.09                     | 1                       | 1                          | 0                        | 0                       | 0                          | 0                                     | 0                                    | 0                                       |
| 398364521 | NAS2    | 0                          | 0                        | 0                       | 0                          | 4.55                     | 1                       | 1                          | 0                        | 0                       | 0                          | 0                                     | 0                                    | 0                                       |
| 6323222   | UPS1    | 0                          | 0                        | 0                       | 0                          | 5.14                     | 1                       | 1                          | 0                        | 0                       | 0                          | 0                                     | 0                                    | 0                                       |
| 6321924   | ECM14   | 0                          | 0                        | 0                       | 0                          | 3.26                     | 1                       | 4                          | 0                        | 0                       | 0                          | 0                                     | 0                                    | 0                                       |
| 398365805 | MSO1    | 0                          | 0                        | 0                       | 0                          | 5.71                     | 1                       | 4                          | 0                        | 0                       | 0                          | 0                                     | 0                                    | 0                                       |
| 6322100   | UTP25   | 0                          | 1.94                     | 1                       | 1                          | 2.08                     | 1                       | 2                          | 0                        | 0                       | 0                          | 0                                     | 0                                    | 0                                       |
| 398365089 | FKH2    | 0                          | 0                        | 0                       | 0                          | 3.25                     | 1                       | 2                          | 0                        | 0                       | 0                          | 0                                     | 0                                    | 0                                       |
| 398364225 | IMP2'P  | 0                          | 0                        | 0                       | 0                          | 4.62                     | 1                       | 2                          | 0                        | 0                       | 0                          | 0                                     | 0                                    | 0                                       |
| 6320643   | PPM1    | 0                          | 0                        | 0                       | 0                          | 4.88                     | 1                       | 2                          | 0                        | 0                       | 0                          | 0                                     | 0                                    | 0                                       |
| 6319436   | POL12   | 0                          | 0                        | 0                       | 0                          | 2.70                     | 1                       | 1                          | 0                        | 0                       | 0                          | 0                                     | 0                                    | 0                                       |
| 6322334   | SPT10   | 0                          | 0                        | 0                       | 0                          | 4.06                     | 1                       | 1                          | 0                        | 0                       | 0                          | 0                                     | 0                                    | 0                                       |
| 6319631   | CNS1    | 0                          | 0                        | 0                       | 0                          | 4.68                     | 1                       | 1                          | 0                        | 0                       | 0                          | 0                                     | 0                                    | 0                                       |
| 6320050   | RPC53   | 0                          | 0                        | 0                       | 0                          | 2.13                     | 1                       | 1                          | 0                        | 0                       | 0                          | 0                                     | 0                                    | 0                                       |
| 6321713   | TAF1    | 0                          | 0                        | 0                       | 0                          | 1.13                     | 1                       | 1                          | 0                        | 0                       | 0                          | 0                                     | 0                                    | 0                                       |
| 6325118   | UME1    | 0                          | 0                        | 0                       | 0                          | 3.70                     | 1                       | 1                          | 0                        | 0                       | 0                          | 0                                     | 0                                    | 0                                       |
| 6321493   | RSC1    | 0                          | 0                        | 0                       | 0                          | 2.48                     | 1                       | 1                          | 0                        | 0                       | 0                          | 0                                     | 0                                    | 0                                       |
| 6323274   | CDD1    | 0                          | 0                        | 0                       | 0                          | 8.45                     | 1                       | 3                          | 0                        | 0                       | 0                          | 0                                     | 0                                    | 0                                       |
| 398364583 | YGL082W | 0                          | 0                        | 0                       | 0                          | 5.51                     | 1                       | 3                          | 0                        | 0                       | 0                          | 0                                     | 0                                    | 0                                       |
| 398364535 | YNL165W | 0                          | 0                        | 0                       | 0                          | 2.71                     | 1                       | 3                          | 0                        | 0                       | 0                          | 0                                     | 0                                    | 0                                       |
| 398365015 | AIM46   | 1                          | 0                        | 0                       | 0                          | 4.52                     | 1                       | 2                          | 0                        | 0                       | 0                          | 0                                     | 0                                    | 0                                       |
| 6325183   | YTA6    | 0                          | 0                        | 0                       | 0                          | 1.33                     | 1                       | 2                          | 0                        | 0                       | 0                          | 0                                     | 0                                    | 0                                       |
| 6324128   | PSY2    | 0                          | 0                        | 0                       | 0                          | 1.28                     | 1                       | 2                          | 0                        | 0                       | 0                          | 0                                     | 0                                    | 0                                       |
| 6320259   | CDC34   | 0                          | 0                        | 0                       | 0                          | 5.42                     | 1                       | 2                          | 0                        | 0                       | 0                          | 0                                     | 0                                    | 0                                       |

Table S1 - Smith-Kinnaman, *et al* (2014) Abbreviations: %SC = percent sequence coverage, UP = unique peptides, PSM = peptide spectrum matches

| Accession | Acronym | # PSM<br>TAP_Rtr1_<br>WT_1 | %SC<br>TAP_Rtr1_<br>WT_2 | UP<br>TAP_Rtr1_<br>WT_2 | # PSM<br>TAP_Rtr1_<br>WT_2 | %SC<br>TAP_Rtr1_<br>WT_3 | UP<br>TAP_Rtr1_<br>WT_3 | # PSM<br>TAP_Rtr1_<br>WT_3 | %SC<br>TAP_Rtr1_<br>WT_4 | UP<br>TAP_Rtr1_<br>WT_4 | # PSM<br>TAP_Rtr1_<br>WT_4 | %SC<br>TAP_Rtr1_<br>ctk1_del<br>etion | UP<br>TAP_Rtr1_<br>ctk1_del<br>etion | # PSM<br>TAP_Rtr1_<br>ctk1_del<br>etion |
|-----------|---------|----------------------------|--------------------------|-------------------------|----------------------------|--------------------------|-------------------------|----------------------------|--------------------------|-------------------------|----------------------------|---------------------------------------|--------------------------------------|-----------------------------------------|
| 398364911 | SPT15   | 0                          | 0                        | 0                       | 0                          | 2.92                     | 1                       | 2                          | 0                        | 0                       | 0                          | 0                                     | 0                                    | 0                                       |
| 330443461 | COS111  | 1                          | 0.87                     | 1                       | 1                          | 1.52                     | 1                       | 1                          | 0                        | 0                       | 0                          | 0                                     | 0                                    | 0                                       |
| 6320652   | YDR444W | 0                          | 0                        | 0                       | 0                          | 2.18                     | 1                       | 1                          | 0                        | 0                       | 0                          | 0                                     | 0                                    | 0                                       |
| 398365541 | UBC13   | 0                          | 0                        | 0                       | 0                          | 12.42                    | 1                       | 1                          | 0                        | 0                       | 0                          | 0                                     | 0                                    | 0                                       |
| 398365707 | GPX2    | 0                          | 0                        | 0                       | 0                          | 8.64                     | 1                       | 1                          | 0                        | 0                       | 0                          | 0                                     | 0                                    | 0                                       |
| 398365979 | GTR2    | 0                          | 0                        | 0                       | 0                          | 2.64                     | 1                       | 1                          | 0                        | 0                       | 0                          | 0                                     | 0                                    | 0                                       |
| 6323528   | YML108W | 0                          | 0                        | 0                       | 0                          | 9.52                     | 1                       | 1                          | 0                        | 0                       | 0                          | 0                                     | 0                                    | 0                                       |
| 6321894   | KIC1    | 0                          | 0                        | 0                       | 0                          | 1.11                     | 1                       | 1                          | 0                        | 0                       | 0                          | 0                                     | 0                                    | 0                                       |
| 398364893 | PTC1    | 0                          | 0                        | 0                       | 0                          | 6.05                     | 1                       | 1                          | 0                        | 0                       | 0                          | 0                                     | 0                                    | 0                                       |
| 398366573 | SIZ1    | 0                          | 0                        | 0                       | 0                          | 1.55                     | 1                       | 1                          | 0                        | 0                       | 0                          | 0                                     | 0                                    | 0                                       |
| 398366291 | TEA1    | 0                          | 0                        | 0                       | 0                          | 3.16                     | 1                       | 1                          | 0                        | 0                       | 0                          | 0                                     | 0                                    | 0                                       |
| 398366471 | TFB1    | 0                          | 0                        | 0                       | 0                          | 1.40                     | 1                       | 1                          | 0                        | 0                       | 0                          | 0                                     | 0                                    | 0                                       |
| 6325426   | NUT2    | 0                          | 0                        | 0                       | 0                          | 5.10                     | 1                       | 1                          | 0                        | 0                       | 0                          | 0                                     | 0                                    | 0                                       |
| 154199620 | CGI121  | 0                          | 0                        | 0                       | 0                          | 4.97                     | 1                       | 1                          | 0                        | 0                       | 0                          | 0                                     | 0                                    | 0                                       |
| 6320156   | SIT4    | 0                          | 0                        | 0                       | 0                          | 6.43                     | 1                       | 1                          | 0                        | 0                       | 0                          | 0                                     | 0                                    | 0                                       |
| 398366599 | APT2    | 0                          | 0                        | 0                       | 0                          | 6.08                     | 1                       | 2                          | 0                        | 0                       | 0                          | 0                                     | 0                                    | 0                                       |
| 6324668   | ARF3    | 0                          | 0                        | 0                       | 0                          | 8.74                     | 1                       | 2                          | 0                        | 0                       | 0                          | 0                                     | 0                                    | 0                                       |
| 6324087   | ATG2    | 0                          | 0                        | 0                       | 0                          | 1.13                     | 1                       | 2                          | 0                        | 0                       | 0                          | 0                                     | 0                                    | 0                                       |
| 6323143   | AVL9    | 0                          | 0                        | 0                       | 0                          | 2.23                     | 1                       | 2                          | 0                        | 0                       | 0                          | 0                                     | 0                                    | 0                                       |
| 398364821 | BYE1    | 0                          | 0                        | 0                       | 0                          | 2.19                     | 1                       | 2                          | 0                        | 0                       | 0                          | 0                                     | 0                                    | 0                                       |
| 6322088   | DPH1    | 0                          | 0                        | 0                       | 0                          | 2.59                     | 1                       | 2                          | 0                        | 0                       | 0                          | 0                                     | 0                                    | 0                                       |
| 6323972   | ELP6    | 0                          | 0                        | 0                       | 0                          | 4.03                     | 1                       | 2                          | 0                        | 0                       | 0                          | 0                                     | 0                                    | 0                                       |
| 398364641 | FLO11   | 0                          | 0                        | 0                       | 0                          | 1.32                     | 1                       | 2                          | 0                        | 0                       | 0                          | 0                                     | 0                                    | 0                                       |
| 6322659   | HYM1    | 0                          | 0                        | 0                       | 0                          | 3.01                     | 1                       | 2                          | 0                        | 0                       | 0                          | 0                                     | 0                                    | 0                                       |
| 6322040   | YIL151C | 0                          | 0                        | 0                       | 0                          | 0.98                     | 1                       | 2                          | 0                        | 0                       | 0                          | 0                                     | 0                                    | 0                                       |
| 398365375 | YKR078W | 0                          | 0                        | 0                       | 0                          | 1.88                     | 1                       | 2                          | 0                        | 0                       | 0                          | 0                                     | 0                                    | 0                                       |
| 6323758   | YMR111C | 0                          | 0                        | 0                       | 0                          | 6.49                     | 1                       | 2                          | 0                        | 0                       | 0                          | 0                                     | 0                                    | 0                                       |
| 6323793   | YMR144  | 0                          | 0                        | 0                       | 0                          | 4.09                     | 1                       | 2                          | 0                        | 0                       | 0                          | 0                                     | 0                                    | 0                                       |
| 6320208   | MAF1    | 0                          | 0                        | 0                       | 0                          | 5.32                     | 1                       | 2                          | 0                        | 0                       | 0                          | 0                                     | 0                                    | 0                                       |
| 6324437   | MED7    | 0                          | 0                        | 0                       | 0                          | 7.21                     | 1                       | 2                          | 0                        | 0                       | 0                          | 0                                     | 0                                    | 0                                       |
| 6323880   | MRE11   | 0                          | 0                        | 0                       | 0                          | 1.45                     | 1                       | 2                          | 0                        | 0                       | 0                          | 0                                     | 0                                    | 0                                       |
| 6323680   | MSN2    | 0                          | 0                        | 0                       | 0                          | 2.27                     | 1                       | 2                          | 0                        | 0                       | 0                          | 0                                     | 0                                    | 0                                       |
| 6324503   | NUF2    | 0                          | 0                        | 0                       | 0                          | 3.10                     | 1                       | 2                          | 0                        | 0                       | 0                          | 0                                     | 0                                    | 0                                       |
| 6323025   | ORC3    | 0                          | 0                        | 0                       | 0                          | 2.11                     | 1                       | 2                          | 0                        | 0                       | 0                          | 0                                     | 0                                    | 0                                       |
| 6323147   | YLR118C | 0                          | 0                        | 0                       | 0                          | 6.61                     | 1                       | 2                          | 0                        | 0                       | 0                          | 0                                     | 0                                    | 0                                       |
| 6322733   | PRR1    | 0                          | 0                        | 0                       | 0                          | 2.51                     | 1                       | 2                          | 0                        | 0                       | 0                          | 0                                     | 0                                    | 0                                       |
| 6319504   | RKM3    | 0                          | 0                        | 0                       | 0                          | 2.17                     | 1                       | 2                          | 0                        | 0                       | 0                          | 0                                     | 0                                    | 0                                       |



Table S1 - Smith-Kinnaman, *et al* (2014) Abbreviations: %SC = percent sequence coverage, UP = unique peptides, PSM = peptide spectrum matches

| Accession | Acronym | # PSM<br>TAP_Rtr1_<br>WT_1 | %SC<br>TAP_Rtr1_<br>WT_2 | UP<br>TAP_Rtr1_<br>WT_2 | # PSM<br>TAP_Rtr1_<br>WT_2 | %SC<br>TAP_Rtr1_<br>WT_3 | UP<br>TAP_Rtr1_<br>WT_3 | # PSM<br>TAP_Rtr1_<br>WT_3 | %SC<br>TAP_Rtr1_<br>WT_4 | UP<br>TAP_Rtr1_<br>WT_4 | # PSM<br>TAP_Rtr1_<br>WT_4 | %SC<br>TAP_Rtr1_<br>ctk1_del<br>etion | UP<br>TAP_Rtr1_<br>ctk1_del<br>etion | # PSM<br>TAP_Rtr1_<br>ctk1_del<br>etion |
|-----------|---------|----------------------------|--------------------------|-------------------------|----------------------------|--------------------------|-------------------------|----------------------------|--------------------------|-------------------------|----------------------------|---------------------------------------|--------------------------------------|-----------------------------------------|
| 6321876   | STE12   | 0                          | 0                        | 0                       | 0                          | 2.47                     | 1                       | 2                          | 0                        | 0                       | 0                          | 0                                     | 0                                    | 0                                       |
| 6324836   | GPN2    | 0                          | 6.34                     | 1                       | 1                          | 5.48                     | 1                       | 1                          | 0                        | 0                       | 0                          | 0                                     | 0                                    | 0                                       |
| 6321605   | TRS65   | 1                          | 0                        | 0                       | 0                          | 2.86                     | 1                       | 1                          | 0                        | 0                       | 0                          | 0                                     | 0                                    | 0                                       |
| 6324138   | DUG3    | 0                          | 0                        | 0                       | 0                          | 4.48                     | 1                       | 1                          | 0                        | 0                       | 0                          | 0                                     | 0                                    | 0                                       |
| 6319940   | HMRA1   | 0                          | 0                        | 0                       | 0                          | 6.35                     | 1                       | 1                          | 0                        | 0                       | 0                          | 0                                     | 0                                    | 0                                       |
| 330443533 | YFL034W | 0                          | 0                        | 0                       | 0                          | 0.84                     | 1                       | 1                          | 0                        | 0                       | 0                          | 0                                     | 0                                    | 0                                       |
| 6323815   | INP2    | 0                          | 0                        | 0                       | 0                          | 2.13                     | 1                       | 1                          | 0                        | 0                       | 0                          | 0                                     | 0                                    | 0                                       |
| 330443515 | PSP1    | 0                          | 0                        | 0                       | 0                          | 1.78                     | 1                       | 1                          | 0                        | 0                       | 0                          | 0                                     | 0                                    | 0                                       |
| 6323711   | SOV1    | 0                          | 0                        | 0                       | 0                          | 1.78                     | 1                       | 1                          | 0                        | 0                       | 0                          | 0                                     | 0                                    | 0                                       |
| 330443539 | FAB1    | 0                          | 0                        | 0                       | 0                          | 0.83                     | 1                       | 1                          | 0                        | 0                       | 0                          | 0                                     | 0                                    | 0                                       |
| 398365149 | ICS2    | 0                          | 0                        | 0                       | 0                          | 7.06                     | 1                       | 1                          | 0                        | 0                       | 0                          | 0                                     | 0                                    | 0                                       |
| 6323764   | SPC24   | 0                          | 0                        | 0                       | 0                          | 5.63                     | 1                       | 1                          | 0                        | 0                       | 0                          | 0                                     | 0                                    | 0                                       |
| 6325028   | CET1    | 0                          | 0                        | 0                       | 0                          | 3.46                     | 1                       | 1                          | 0                        | 0                       | 0                          | 0                                     | 0                                    | 0                                       |
| 6322081   | HPM1    | 0                          | 0                        | 0                       | 0                          | 4.77                     | 1                       | 1                          | 0                        | 0                       | 0                          | 0                                     | 0                                    | 0                                       |
| 6322195   | IST3    | 0                          | 0                        | 0                       | 0                          | 9.46                     | 1                       | 1                          | 0                        | 0                       | 0                          | 0                                     | 0                                    | 0                                       |
| 398366647 | RSM28   | 0                          | 0                        | 0                       | 0                          | 3.88                     | 1                       | 1                          | 0                        | 0                       | 0                          | 0                                     | 0                                    | 0                                       |
| 6320113   | RAM1    | 0                          | 0                        | 0                       | 0                          | 3.71                     | 1                       | 1                          | 0                        | 0                       | 0                          | 0                                     | 0                                    | 0                                       |
| 6323522   | TAF8    | 0                          | 0                        | 0                       | 0                          | 3.92                     | 1                       | 1                          | 0                        | 0                       | 0                          | 0                                     | 0                                    | 0                                       |
| 6323874   | TRS130  | 0                          | 0                        | 0                       | 0                          | 0.73                     | 1                       | 1                          | 0                        | 0                       | 0                          | 0                                     | 0                                    | 0                                       |
| 6323456   | SPP382  | 0                          | 0                        | 0                       | 0                          | 1.69                     | 1                       | 1                          | 0                        | 0                       | 0                          | 0                                     | 0                                    | 0                                       |
| 6324386   | BIO3    | 0                          | 0                        | 0                       | 0                          | 2.92                     | 1                       | 1                          | 0                        | 0                       | 0                          | 0                                     | 0                                    | 0                                       |
| 6324228   | AVT4    | 0                          | 0                        | 0                       | 0                          | 4.77                     | 1                       | 1                          | 0                        | 0                       | 0                          | 0                                     | 0                                    | 0                                       |
| 398364711 | RAM2    | 0                          | 0                        | 0                       | 0                          | 4.11                     | 1                       | 1                          | 0                        | 0                       | 0                          | 0                                     | 0                                    | 0                                       |
| 14318494  | BST1    | 0                          | 0                        | 0                       | 0                          | 0.97                     | 1                       | 1                          | 0                        | 0                       | 0                          | 0                                     | 0                                    | 0                                       |
| 6320579   | CTS2    | 0                          | 0                        | 0                       | 0                          | 2.15                     | 1                       | 1                          | 0                        | 0                       | 0                          | 0                                     | 0                                    | 0                                       |
| 6322760   | CUE2    | 0                          | 0                        | 0                       | 0                          | 3.84                     | 1                       | 1                          | 0                        | 0                       | 0                          | 0                                     | 0                                    | 0                                       |
| 6320023   | DLD2    | 0                          | 0                        | 0                       | 0                          | 5.28                     | 1                       | 1                          | 0                        | 0                       | 0                          | 0                                     | 0                                    | 0                                       |
| 6323060   | RAD5    | 0                          | 0                        | 0                       | 0                          | 1.03                     | 1                       | 1                          | 0                        | 0                       | 0                          | 0                                     | 0                                    | 0                                       |
| 6319754   | DPB3    | 0                          | 0                        | 0                       | 0                          | 3.98                     | 1                       | 1                          | 0                        | 0                       | 0                          | 0                                     | 0                                    | 0                                       |
| 6319994   | GLE1    | 0                          | 0                        | 0                       | 0                          | 2.42                     | 1                       | 1                          | 0                        | 0                       | 0                          | 0                                     | 0                                    | 0                                       |
| 6323950   | HER2    | 0                          | 0                        | 0                       | 0                          | 3.66                     | 1                       | 1                          | 0                        | 0                       | 0                          | 0                                     | 0                                    | 0                                       |
| 398366409 | GPB1    | 0                          | 0                        | 0                       | 0                          | 0.89                     | 1                       | 1                          | 0                        | 0                       | 0                          | 0                                     | 0                                    | 0                                       |
| 6319390   | YBL081W | 0                          | 0                        | 0                       | 0                          | 3.80                     | 1                       | 1                          | 0                        | 0                       | 0                          | 0                                     | 0                                    | 0                                       |
| 398364947 | YDR003W | 0                          | 0                        | 0                       | 0                          | 32.50                    | 1                       | 1                          | 0                        | 0                       | 0                          | 0                                     | 0                                    | 0                                       |
| 6323384   | YLR352W | 0                          | 0                        | 0                       | 0                          | 2.35                     | 1                       | 1                          | 0                        | 0                       | 0                          | 0                                     | 0                                    | 0                                       |
| 6324536   | YOL036W | 0                          | 0                        | 0                       | 0                          | 1.84                     | 1                       | 1                          | 0                        | 0                       | 0                          | 0                                     | 0                                    | 0                                       |
| 6325180   | YPL077C | 0                          | 0                        | 0                       | 0                          | 4.17                     | 1                       | 1                          | 0                        | 0                       | 0                          | 0                                     | 0                                    | 0                                       |

Table S1 - Smith-Kinnaman, *et al* (2014) Abbreviations: %SC = percent sequence coverage, UP = unique peptides, PSM = peptide spectrum matches

| Accession | Acronym | # PSM<br>TAP_Rtr1_<br>WT_1 | %SC<br>TAP_Rtr1_<br>WT_2 | UP<br>TAP_Rtr1_<br>WT_2 | # PSM<br>TAP_Rtr1_<br>WT_2 | %SC<br>TAP_Rtr1_<br>WT_3 | UP<br>TAP_Rtr1_<br>WT_3 | # PSM<br>TAP_Rtr1_<br>WT_3 | %SC<br>TAP_Rtr1_<br>WT_4 | UP<br>TAP_Rtr1_<br>WT_4 | # PSM<br>TAP_Rtr1_<br>WT_4 | %SC<br>TAP_Rtr1_<br>ctk1_del<br>etion | UP<br>TAP_Rtr1_<br>ctk1_del<br>etion | # PSM<br>TAP_Rtr1_<br>ctk1_del<br>etion |
|-----------|---------|----------------------------|--------------------------|-------------------------|----------------------------|--------------------------|-------------------------|----------------------------|--------------------------|-------------------------|----------------------------|---------------------------------------|--------------------------------------|-----------------------------------------|
| 6320328   | INO2    | 0                          | 0                        | 0                       | 0                          | 3.95                     | 1                       | 1                          | 0                        | 0                       | 0                          | 0                                     | 0                                    | 0                                       |
| 6324064   | IST1    | 0                          | 0                        | 0                       | 0                          | 3.36                     | 1                       | 1                          | 0                        | 0                       | 0                          | 0                                     | 0                                    | 0                                       |
| 6321196   | KAP114  | 0                          | 0                        | 0                       | 0                          | 1.49                     | 1                       | 1                          | 0                        | 0                       | 0                          | 0                                     | 0                                    | 0                                       |
| 398366685 | KRE28   | 0                          | 0                        | 0                       | 0                          | 3.64                     | 1                       | 1                          | 0                        | 0                       | 0                          | 0                                     | 0                                    | 0                                       |
| 398364391 | KRE29   | 0                          | 0                        | 0                       | 0                          | 3.88                     | 1                       | 1                          | 0                        | 0                       | 0                          | 0                                     | 0                                    | 0                                       |
| 6320055   | LDB17   | 0                          | 0                        | 0                       | 0                          | 3.67                     | 1                       | 1                          | 0                        | 0                       | 0                          | 0                                     | 0                                    | 0                                       |
| 6321950   | LIN1    | 0                          | 0                        | 0                       | 0                          | 4.71                     | 1                       | 1                          | 0                        | 0                       | 0                          | 0                                     | 0                                    | 0                                       |
| 6325219   | MET31   | 0                          | 0                        | 0                       | 0                          | 9.60                     | 1                       | 1                          | 0                        | 0                       | 0                          | 0                                     | 0                                    | 0                                       |
| 6320158   | YMS-T   | 0                          | 0                        | 0                       | 0                          | 9.47                     | 1                       | 1                          | 0                        | 0                       | 0                          | 0                                     | 0                                    | 0                                       |
| 6323472   | YML4    | 0                          | 0                        | 0                       | 0                          | 4.08                     | 1                       | 1                          | 0                        | 0                       | 0                          | 0                                     | 0                                    | 0                                       |
| 6324640   | MSA1    | 0                          | 0                        | 0                       | 0                          | 3.18                     | 1                       | 1                          | 0                        | 0                       | 0                          | 0                                     | 0                                    | 0                                       |
| 6319938   | OCA4    | 0                          | 0                        | 0                       | 0                          | 3.04                     | 1                       | 1                          | 0                        | 0                       | 0                          | 0                                     | 0                                    | 0                                       |
| 14318475  | OTU1    | 0                          | 0                        | 0                       | 0                          | 6.64                     | 1                       | 1                          | 0                        | 0                       | 0                          | 0                                     | 0                                    | 0                                       |
| 6324012   | PFS2    | 0                          | 0                        | 0                       | 0                          | 1.94                     | 1                       | 1                          | 0                        | 0                       | 0                          | 0                                     | 0                                    | 0                                       |
| 398366005 | PLP1    | 0                          | 0                        | 0                       | 0                          | 6.96                     | 1                       | 1                          | 0                        | 0                       | 0                          | 0                                     | 0                                    | 0                                       |
| 6321904   | YHR112C | 0                          | 0                        | 0                       | 0                          | 7.41                     | 1                       | 1                          | 0                        | 0                       | 0                          | 0                                     | 0                                    | 0                                       |
| 6323631   | RAD33   | 0                          | 0                        | 0                       | 0                          | 5.65                     | 1                       | 1                          | 0                        | 0                       | 0                          | 0                                     | 0                                    | 0                                       |
| 6323930   | RCE1    | 0                          | 0                        | 0                       | 0                          | 8.57                     | 1                       | 1                          | 0                        | 0                       | 0                          | 0                                     | 0                                    | 0                                       |
| 6324701   | RGA1    | 0                          | 0                        | 0                       | 0                          | 1.69                     | 1                       | 1                          | 0                        | 0                       | 0                          | 0                                     | 0                                    | 0                                       |
| 6323919   | SAP30   | 0                          | 0                        | 0                       | 0                          | 4.98                     | 1                       | 1                          | 0                        | 0                       | 0                          | 0                                     | 0                                    | 0                                       |
| 6322536   | CDC11   | 0                          | 0                        | 0                       | 0                          | 3.13                     | 1                       | 1                          | 0                        | 0                       | 0                          | 0                                     | 0                                    | 0                                       |
| 6319410   | SKT5    | 0                          | 0                        | 0                       | 0                          | 1.29                     | 1                       | 1                          | 0                        | 0                       | 0                          | 0                                     | 0                                    | 0                                       |
| 6321311   | SOH1    | 0                          | 0                        | 0                       | 0                          | 12.60                    | 1                       | 1                          | 0                        | 0                       | 0                          | 0                                     | 0                                    | 0                                       |
| 398364839 | SLX5    | 0                          | 0                        | 0                       | 0                          | 1.94                     | 1                       | 1                          | 0                        | 0                       | 0                          | 0                                     | 0                                    | 0                                       |
| 330443427 | TCM62   | 0                          | 0                        | 0                       | 0                          | 2.45                     | 1                       | 1                          | 0                        | 0                       | 0                          | 0                                     | 0                                    | 0                                       |
| 6324684   | TFC7    | 0                          | 0                        | 0                       | 0                          | 3.91                     | 1                       | 1                          | 0                        | 0                       | 0                          | 0                                     | 0                                    | 0                                       |
| 398364235 | TID3    | 0                          | 0                        | 0                       | 0                          | 2.17                     | 1                       | 1                          | 0                        | 0                       | 0                          | 0                                     | 0                                    | 0                                       |
| 6325297   | TIP41   | 0                          | 0                        | 0                       | 0                          | 3.65                     | 1                       | 1                          | 0                        | 0                       | 0                          | 0                                     | 0                                    | 0                                       |
| 6320112   | UBX3    | 0                          | 0                        | 0                       | 0                          | 3.30                     | 1                       | 1                          | 0                        | 0                       | 0                          | 0                                     | 0                                    | 0                                       |
| 6324852   | HEM4    | 0                          | 0                        | 0                       | 0                          | 5.45                     | 1                       | 1                          | 0                        | 0                       | 0                          | 0                                     | 0                                    | 0                                       |
| 398366151 | UTP21   | 0                          | 0                        | 0                       | 0                          | 1.17                     | 1                       | 1                          | 0                        | 0                       | 0                          | 0                                     | 0                                    | 0                                       |
| 6323405   | VID22   | 0                          | 0                        | 0                       | 0                          | 2.11                     | 1                       | 1                          | 0                        | 0                       | 0                          | 0                                     | 0                                    | 0                                       |
| 398366111 | VPS33   | 0                          | 0                        | 0                       | 0                          | 1.74                     | 1                       | 1                          | 0                        | 0                       | 0                          | 0                                     | 0                                    | 0                                       |
| 398366641 | VPS60   | 0                          | 0                        | 0                       | 0                          | 8.73                     | 1                       | 1                          | 0                        | 0                       | 0                          | 0                                     | 0                                    | 0                                       |
| 398364823 | YAF9    | 0                          | 0                        | 0                       | 0                          | 5.31                     | 1                       | 1                          | 0                        | 0                       | 0                          | 0                                     | 0                                    | 0                                       |
| 27469361  | YCG1    | 0                          | 0                        | 0                       | 0                          | 1.35                     | 1                       | 1                          | 0                        | 0                       | 0                          | 0                                     | 0                                    | 0                                       |
| 14318529  | YFH7    | 0                          | 0                        | 0                       | 0                          | 3.40                     | 1                       | 1                          | 0                        | 0                       | 0                          | 0                                     | 0                                    | 0                                       |

Table S1 - Smith-Kinnaman, *et al* (2014) Abbreviations: %SC = percent sequence coverage, UP = unique peptides, PSM = peptide spectrum matches

| Accession | Acronym | # PSM<br>TAP_Rtr1_<br>WT_1 | %SC<br>TAP_Rtr1_<br>WT_2 | UP<br>TAP_Rtr1_<br>WT_2 | # PSM<br>TAP_Rtr1_<br>WT_2 | %SC<br>TAP_Rtr1_<br>WT_3 | UP<br>TAP_Rtr1_<br>WT_3 | # PSM<br>TAP_Rtr1_<br>WT_3 | %SC<br>TAP_Rtr1_<br>WT_4 | UP<br>TAP_Rtr1_<br>WT_4 | # PSM<br>TAP_Rtr1_<br>WT_4 | %SC<br>TAP_Rtr1_<br>ctk1_del<br>etion | UP<br>TAP_Rtr1_<br>ctk1_del<br>etion | # PSM<br>TAP_Rtr1_<br>ctk1_del<br>etion |
|-----------|---------|----------------------------|--------------------------|-------------------------|----------------------------|--------------------------|-------------------------|----------------------------|--------------------------|-------------------------|----------------------------|---------------------------------------|--------------------------------------|-----------------------------------------|
| 6322153   | CST6    | 11                         | 0                        | 0                       | 0                          | 3.92                     | 1                       | 3                          | 0                        | 0                       | 0                          | 0                                     | 0                                    | 0                                       |
| 14318524  | NIC96   | 0                          | 0                        | 0                       | 0                          | 1.07                     | 1                       | 1                          | 0                        | 0                       | 0                          | 0                                     | 0                                    | 0                                       |
| 6324402   | AIF1    | 0                          | 0                        | 0                       | 0                          | 5.03                     | 1                       | 3                          | 0                        | 0                       | 0                          | 0                                     | 0                                    | 0                                       |
| 398364507 | DOT5    | 0                          | 0                        | 0                       | 0                          | 4.19                     | 1                       | 2                          | 0                        | 0                       | 0                          | 0                                     | 0                                    | 0                                       |
| 398365867 | ENT5    | 0                          | 0                        | 0                       | 0                          | 4.14                     | 1                       | 2                          | 0                        | 0                       | 0                          | 0                                     | 0                                    | 0                                       |
| 6324130   | GCR2    | 1                          | 0                        | 0                       | 0                          | 2.62                     | 1                       | 4                          | 0                        | 0                       | 0                          | 0                                     | 0                                    | 0                                       |
| 6323148   | SRN2    | 0                          | 0                        | 0                       | 0                          | 6.10                     | 1                       | 1                          | 0                        | 0                       | 0                          | 0                                     | 0                                    | 0                                       |
| 6319738   | TAE1    | 0                          | 0                        | 0                       | 0                          | 3.88                     | 1                       | 1                          | 0                        | 0                       | 0                          | 0                                     | 0                                    | 0                                       |
| 6324656   | WHI5    | 0                          | 0                        | 0                       | 0                          | 2.71                     | 1                       | 4                          | 0                        | 0                       | 0                          | 0                                     | 0                                    | 0                                       |
| 6324781   | RET1    | 0                          | 0                        | 0                       | 0                          | 1.04                     | 1                       | 2                          | 0                        | 0                       | 0                          | 0                                     | 0                                    | 0                                       |
| 37362668  | YJL016W | 0                          | 0                        | 0                       | 0                          | 2.14                     | 1                       | 1                          | 0                        | 0                       | 0                          | 0                                     | 0                                    | 0                                       |
| 6321609   | PSD2    | 0                          | 0                        | 0                       | 0                          | 2.20                     | 1                       | 1                          | 0                        | 0                       | 0                          | 0                                     | 0                                    | 0                                       |
| 6321481   | RME1    | 0                          | 0                        | 0                       | 0                          | 3.67                     | 1                       | 1                          | 0                        | 0                       | 0                          | 0                                     | 0                                    | 0                                       |
| 6325431   | VPS4    | 0                          | 0                        | 0                       | 0                          | 3.89                     | 1                       | 1                          | 0                        | 0                       | 0                          | 0                                     | 0                                    | 0                                       |
| 6324854   | FSH3    | 0                          | 0                        | 0                       | 0                          | 6.39                     | 1                       | 1                          | 0                        | 0                       | 0                          | 0                                     | 0                                    | 0                                       |
| 330443376 | MAK16   | 0                          | 0                        | 0                       | 0                          | 4.58                     | 1                       | 1                          | 0                        | 0                       | 0                          | 0                                     | 0                                    | 0                                       |
| 6322690   | RCN1    | 0                          | 0                        | 0                       | 0                          | 7.11                     | 1                       | 5                          | 0                        | 0                       | 0                          | 0                                     | 0                                    | 0                                       |
| 6322431   | VPS53   | 0                          | 0                        | 0                       | 0                          | 1.70                     | 1                       | 1                          | 0                        | 0                       | 0                          | 0                                     | 0                                    | 0                                       |
| 6322631   | SRY1    | 0                          | 0                        | 0                       | 0                          | 4.91                     | 1                       | 1                          | 0                        | 0                       | 0                          | 0                                     | 0                                    | 0                                       |
| 6320580   | VPS74   | 0                          | 0                        | 0                       | 0                          | 9.57                     | 2                       | 3                          | 0                        | 0                       | 0                          | 0                                     | 0                                    | 0                                       |
| 9755336   | DID4    | 0                          | 0                        | 0                       | 0                          | 9.91                     | 2                       | 2                          | 0                        | 0                       | 0                          | 0                                     | 0                                    | 0                                       |
| 6323881   | YML44   | 0                          | 0                        | 0                       | 0                          | 27.55                    | 2                       | 4                          | 0                        | 0                       | 0                          | 0                                     | 0                                    | 0                                       |
| 398366509 | MRP1    | 0                          | 0                        | 0                       | 0                          | 9.66                     | 2                       | 3                          | 0                        | 0                       | 0                          | 0                                     | 0                                    | 0                                       |
| 6320035   | FAP7    | 0                          | 0                        | 0                       | 0                          | 12.69                    | 2                       | 5                          | 0                        | 0                       | 0                          | 0                                     | 0                                    | 0                                       |
| 6323354   | SFH1    | 0                          | 0                        | 0                       | 0                          | 7.28                     | 2                       | 13                         | 0                        | 0                       | 0                          | 0                                     | 0                                    | 0                                       |
| 6323531   | SEC65   | 0                          | 0                        | 0                       | 0                          | 9.16                     | 2                       | 6                          | 0                        | 0                       | 0                          | 0                                     | 0                                    | 0                                       |
| 6321433   | COG7    | 0                          | 0                        | 0                       | 0                          | 9.32                     | 2                       | 4                          | 0                        | 0                       | 0                          | 0                                     | 0                                    | 0                                       |
| 398364865 | PIB2    | 0                          | 2.68                     | 1                       | 1                          | 5.67                     | 2                       | 12                         | 0                        | 0                       | 0                          | 0                                     | 0                                    | 0                                       |
| 6320673   | RMT2    | 0                          | 0                        | 0                       | 0                          | 5.10                     | 2                       | 7                          | 0                        | 0                       | 0                          | 0                                     | 0                                    | 0                                       |
| 6323417   | SWC7    | 0                          | 0                        | 0                       | 0                          | 19.70                    | 2                       | 2                          | 0                        | 0                       | 0                          | 0                                     | 0                                    | 0                                       |
| 6324423   | DCP1    | 0                          | 0                        | 0                       | 0                          | 9.09                     | 2                       | 6                          | 0                        | 0                       | 0                          | 0                                     | 0                                    | 0                                       |
| 398365921 | TAF10   | 1                          | 0                        | 0                       | 0                          | 20.87                    | 2                       | 4                          | 0                        | 0                       | 0                          | 0                                     | 0                                    | 0                                       |
| 6323712   | UBX4    | 0                          | 0                        | 0                       | 0                          | 5.77                     | 2                       | 9                          | 0                        | 0                       | 0                          | 0                                     | 0                                    | 0                                       |
| 6325166   | GLR1    | 0                          | 0                        | 0                       | 0                          | 6.83                     | 2                       | 3                          | 0                        | 0                       | 0                          | 0                                     | 0                                    | 0                                       |
| 6320994   | LSM5    | 0                          | 0                        | 0                       | 0                          | 26.88                    | 2                       | 2                          | 0                        | 0                       | 0                          | 0                                     | 0                                    | 0                                       |
| 398366515 | TRP4    | 0                          | 0                        | 0                       | 0                          | 7.89                     | 2                       | 4                          | 0                        | 0                       | 0                          | 0                                     | 0                                    | 0                                       |
| 6324551   | TSR4    | 0                          | 0                        | 0                       | 0                          | 6.62                     | 2                       | 2                          | 0                        | 0                       | 0                          | 0                                     | 0                                    | 0                                       |

Table S1 - Smith-Kinnaman, *et al* (2014) Abbreviations: %SC = percent sequence coverage, UP = unique peptides, PSM = peptide spectrum matches

| Accession | Acronym | # PSM<br>TAP_Rtr1_<br>WT_1 | %SC<br>TAP_Rtr1_<br>WT_2 | UP<br>TAP_Rtr1_<br>WT_2 | # PSM<br>TAP_Rtr1_<br>WT_2 | %SC<br>TAP_Rtr1_<br>WT_3 | UP<br>TAP_Rtr1_<br>WT_3 | # PSM<br>TAP_Rtr1_<br>WT_3 | %SC<br>TAP_Rtr1_<br>WT_4 | UP<br>TAP_Rtr1_<br>WT_4 | # PSM<br>TAP_Rtr1_<br>WT_4 | %SC<br>TAP_Rtr1_<br>ctk1_del<br>etion | UP<br>TAP_Rtr1_<br>ctk1_del<br>etion | # PSM<br>TAP_Rtr1_<br>ctk1_del<br>etion |
|-----------|---------|----------------------------|--------------------------|-------------------------|----------------------------|--------------------------|-------------------------|----------------------------|--------------------------|-------------------------|----------------------------|---------------------------------------|--------------------------------------|-----------------------------------------|
| 6324068   | ORC5    | 0                          | 0                        | 0                       | 0                          | 5.22                     | 2                       | 5                          | 0                        | 0                       | 0                          | 0                                     | 0                                    | 0                                       |
| 6325213   | NOP4    | 0                          | 0                        | 0                       | 0                          | 5.11                     | 2                       | 2                          | 0                        | 0                       | 0                          | 0                                     | 0                                    | 0                                       |
| 6324041   | CAF40   | 0                          | 0                        | 0                       | 0                          | 6.43                     | 2                       | 6                          | 0                        | 0                       | 0                          | 0                                     | 0                                    | 0                                       |
| 6320086   | CYK3    | 0                          | 0                        | 0                       | 0                          | 3.62                     | 2                       | 6                          | 0                        | 0                       | 0                          | 0                                     | 0                                    | 0                                       |
| 6321762   | SNF6    | 0                          | 12.95                    | 1                       | 1                          | 10.84                    | 2                       | 5                          | 0                        | 0                       | 0                          | 0                                     | 0                                    | 0                                       |
| 398365087 | GRX4    | 0                          | 0                        | 0                       | 0                          | 8.20                     | 2                       | 5                          | 0                        | 0                       | 0                          | 0                                     | 0                                    | 0                                       |
| 6323218   | ATG26   | 0                          | 0                        | 0                       | 0                          | 2.59                     | 2                       | 5                          | 0                        | 0                       | 0                          | 0                                     | 0                                    | 0                                       |
| 41629693  | PRP18   | 0                          | 0                        | 0                       | 0                          | 7.97                     | 2                       | 5                          | 0                        | 0                       | 0                          | 0                                     | 0                                    | 0                                       |
| 330443528 | PTP3    | 0                          | 0                        | 0                       | 0                          | 3.66                     | 2                       | 5                          | 0                        | 0                       | 0                          | 0                                     | 0                                    | 0                                       |
| 398364733 | YIR035C | 0                          | 0                        | 0                       | 0                          | 10.24                    | 2                       | 2                          | 0                        | 0                       | 0                          | 0                                     | 0                                    | 0                                       |
| 6321766   | AIM17   | 0                          | 0                        | 0                       | 0                          | 6.67                     | 2                       | 4                          | 0                        | 0                       | 0                          | 0                                     | 0                                    | 0                                       |
| 14318483  | MOB2    | 0                          | 0                        | 0                       | 0                          | 10.10                    | 2                       | 4                          | 0                        | 0                       | 0                          | 0                                     | 0                                    | 0                                       |
| 6324527   | PSK2    | 0                          | 0                        | 0                       | 0                          | 2.72                     | 2                       | 4                          | 0                        | 0                       | 0                          | 0                                     | 0                                    | 0                                       |
| 398365421 | PRP16   | 0                          | 0                        | 0                       | 0                          | 2.89                     | 2                       | 3                          | 0                        | 0                       | 0                          | 0                                     | 0                                    | 0                                       |
| 41629685  | RSC30   | 0                          | 0                        | 0                       | 0                          | 2.04                     | 2                       | 3                          | 0                        | 0                       | 0                          | 0                                     | 0                                    | 0                                       |
| 6320907   | VHR2    | 0                          | 0                        | 0                       | 0                          | 4.75                     | 2                       | 2                          | 0                        | 0                       | 0                          | 0                                     | 0                                    | 0                                       |
| 398366405 | GCN2    | 0                          | 0                        | 0                       | 0                          | 1.57                     | 2                       | 3                          | 0                        | 0                       | 0                          | 0                                     | 0                                    | 0                                       |
| 398364549 | GYP6    | 0                          | 0                        | 0                       | 0                          | 5.02                     | 2                       | 3                          | 0                        | 0                       | 0                          | 0                                     | 0                                    | 0                                       |
| 330443696 | YNL193W | 0                          | 0                        | 0                       | 0                          | 5.38                     | 2                       | 3                          | 0                        | 0                       | 0                          | 0                                     | 0                                    | 0                                       |
| 6325243   | YPL014W | 0                          | 0                        | 0                       | 0                          | 9.97                     | 2                       | 3                          | 0                        | 0                       | 0                          | 0                                     | 0                                    | 0                                       |
| 6325327   | MED1    | 0                          | 0                        | 0                       | 0                          | 5.12                     | 2                       | 3                          | 0                        | 0                       | 0                          | 0                                     | 0                                    | 0                                       |
| 6320160   | MTF2    | 0                          | 0                        | 0                       | 0                          | 5.23                     | 2                       | 3                          | 0                        | 0                       | 0                          | 0                                     | 0                                    | 0                                       |
| 6319287   | PRP45   | 0                          | 0                        | 0                       | 0                          | 6.86                     | 2                       | 3                          | 0                        | 0                       | 0                          | 0                                     | 0                                    | 0                                       |
| 398365919 | SEC5    | 0                          | 0                        | 0                       | 0                          | 2.78                     | 2                       | 3                          | 0                        | 0                       | 0                          | 0                                     | 0                                    | 0                                       |
| 6320433   | SIR4    | 0                          | 0                        | 0                       | 0                          | 2.36                     | 2                       | 2                          | 0                        | 0                       | 0                          | 0                                     | 0                                    | 0                                       |
| 6321725   | BIO2    | 0                          | 0                        | 0                       | 0                          | 9.60                     | 2                       | 2                          | 0                        | 0                       | 0                          | 0                                     | 0                                    | 0                                       |
| 6324177   | INN1    | 0                          | 0                        | 0                       | 0                          | 6.11                     | 2                       | 2                          | 0                        | 0                       | 0                          | 0                                     | 0                                    | 0                                       |
| 6319534   | ORC2    | 0                          | 0                        | 0                       | 0                          | 4.35                     | 2                       | 2                          | 0                        | 0                       | 0                          | 0                                     | 0                                    | 0                                       |
| 6320887   | SAP1    | 0                          | 0                        | 0                       | 0                          | 3.34                     | 2                       | 2                          | 0                        | 0                       | 0                          | 0                                     | 0                                    | 0                                       |
| 6321204   | SEC15   | 0                          | 0                        | 0                       | 0                          | 2.75                     | 2                       | 2                          | 0                        | 0                       | 0                          | 0                                     | 0                                    | 0                                       |
| 6323111   | SRL2    | 0                          | 0                        | 0                       | 0                          | 6.63                     | 2                       | 2                          | 0                        | 0                       | 0                          | 0                                     | 0                                    | 0                                       |
| 398366601 | SSN2    | 0                          | 0                        | 0                       | 0                          | 2.32                     | 2                       | 2                          | 0                        | 0                       | 0                          | 0                                     | 0                                    | 0                                       |
| 6323541   | VPS9    | 0                          | 0                        | 0                       | 0                          | 7.76                     | 2                       | 2                          | 0                        | 0                       | 0                          | 0                                     | 0                                    | 0                                       |
| 6321955   | YAP1801 | 0                          | 0                        | 0                       | 0                          | 4.87                     | 2                       | 5                          | 0                        | 0                       | 0                          | 0                                     | 0                                    | 0                                       |
| 6323215   | EMG1    | 0                          | 0                        | 0                       | 0                          | 13.10                    | 2                       | 3                          | 0                        | 0                       | 0                          | 0                                     | 0                                    | 0                                       |
| 6319868   | HTL1    | 0                          | 0                        | 0                       | 0                          | 33.33                    | 2                       | 5                          | 0                        | 0                       | 0                          | 0                                     | 0                                    | 0                                       |
| 6321537   | MDR1    | 0                          | 0                        | 0                       | 0                          | 2.84                     | 2                       | 3                          | 0                        | 0                       | 0                          | 0                                     | 0                                    | 0                                       |

Table S1 - Smith-Kinnaman, *et al* (2014) Abbreviations: %SC = percent sequence coverage, UP = unique peptides, PSM = peptide spectrum matches

| Accession | Acronym | # PSM<br>TAP_Rtr1_<br>WT_1 | %SC<br>TAP_Rtr1_<br>WT_2 | UP<br>TAP_Rtr1_<br>WT_2 | # PSM<br>TAP_Rtr1_<br>WT_2 | %SC<br>TAP_Rtr1_<br>WT_3 | UP<br>TAP_Rtr1_<br>WT_3 | # PSM<br>TAP_Rtr1_<br>WT_3 | %SC<br>TAP_Rtr1_<br>WT_4 | UP<br>TAP_Rtr1_<br>WT_4 | # PSM<br>TAP_Rtr1_<br>WT_4 | %SC<br>TAP_Rtr1_<br>ctk1_del<br>etion | UP<br>TAP_Rtr1_<br>ctk1_del<br>etion | # PSM<br>TAP_Rtr1_<br>ctk1_del<br>etion |
|-----------|---------|----------------------------|--------------------------|-------------------------|----------------------------|--------------------------|-------------------------|----------------------------|--------------------------|-------------------------|----------------------------|---------------------------------------|--------------------------------------|-----------------------------------------|
| 6321941   | YML16   | 0                          | 0                        | 0                       | 0                          | 10.75                    | 2                       | 2                          | 0                        | 0                       | 0                          | 0                                     | 0                                    | 0                                       |
| 398365813 | POP2    | 0                          | 0                        | 0                       | 0                          | 4.85                     | 2                       | 2                          | 0                        | 0                       | 0                          | 0                                     | 0                                    | 0                                       |
| 6322855   | OSH6    | 12                         | 0                        | 0                       | 0                          | 4.69                     | 2                       | 4                          | 0                        | 0                       | 0                          | 0                                     | 0                                    | 0                                       |
| 6319407   | PRX1    | 0                          | 0                        | 0                       | 0                          | 14.94                    | 3                       | 7                          | 0                        | 0                       | 0                          | 0                                     | 0                                    | 0                                       |
| 398366397 | SCP1    | 0                          | 0                        | 0                       | 0                          | 22.00                    | 3                       | 7                          | 0                        | 0                       | 0                          | 0                                     | 0                                    | 0                                       |
| 6325247   | RET3    | 0                          | 0                        | 0                       | 0                          | 21.16                    | 3                       | 7                          | 0                        | 0                       | 0                          | 0                                     | 0                                    | 0                                       |
| 6322574   | RSM7    | 1                          | 0                        | 0                       | 0                          | 15.79                    | 3                       | 3                          | 0                        | 0                       | 0                          | 0                                     | 0                                    | 0                                       |
| 6321831   | SRB2    | 0                          | 0                        | 0                       | 0                          | 23.81                    | 3                       | 7                          | 0                        | 0                       | 0                          | 0                                     | 0                                    | 0                                       |
| 6324815   | MET7    | 0                          | 0                        | 0                       | 0                          | 8.21                     | 3                       | 7                          | 0                        | 0                       | 0                          | 0                                     | 0                                    | 0                                       |
| 6322771   | SMY1    | 0                          | 0                        | 0                       | 0                          | 7.16                     | 3                       | 8                          | 0                        | 0                       | 0                          | 0                                     | 0                                    | 0                                       |
| 398365395 | MED8    | 0                          | 0                        | 0                       | 0                          | 19.73                    | 3                       | 11                         | 0                        | 0                       | 0                          | 0                                     | 0                                    | 0                                       |
| 16740527  | ATG18   | 0                          | 0                        | 0                       | 0                          | 9.40                     | 3                       | 8                          | 0                        | 0                       | 0                          | 0                                     | 0                                    | 0                                       |
| 6320526   | SWA2    | 0                          | 0                        | 0                       | 0                          | 7.49                     | 3                       | 10                         | 0                        | 0                       | 0                          | 0                                     | 0                                    | 0                                       |
| 6319430   | PRE7    | 0                          | 0                        | 0                       | 0                          | 17.84                    | 3                       | 9                          | 0                        | 0                       | 0                          | 0                                     | 0                                    | 0                                       |
| 6323626   | TAF11   | 0                          | 0                        | 0                       | 0                          | 10.69                    | 3                       | 4                          | 0                        | 0                       | 0                          | 0                                     | 0                                    | 0                                       |
| 6319558   | MIS1    | 0                          | 0                        | 0                       | 0                          | 4.10                     | 3                       | 3                          | 0                        | 0                       | 0                          | 0                                     | 0                                    | 0                                       |
| 398366353 | SOG2    | 0                          | 0                        | 0                       | 0                          | 5.94                     | 3                       | 6                          | 0                        | 0                       | 0                          | 0                                     | 0                                    | 0                                       |
| 6321377   | DUO1    | 0                          | 0                        | 0                       | 0                          | 18.22                    | 3                       | 3                          | 0                        | 0                       | 0                          | 0                                     | 0                                    | 0                                       |
| 6319820   | BIK1    | 0                          | 0                        | 0                       | 0                          | 10.00                    | 3                       | 6                          | 0                        | 0                       | 0                          | 0                                     | 0                                    | 0                                       |
| 6325187   | MUK1    | 0                          | 0                        | 0                       | 0                          | 7.35                     | 3                       | 6                          | 0                        | 0                       | 0                          | 0                                     | 0                                    | 0                                       |
| 6320957   | SWI4    | 0                          | 0                        | 0                       | 0                          | 4.85                     | 3                       | 6                          | 0                        | 0                       | 0                          | 0                                     | 0                                    | 0                                       |
| 398366093 | EBS1    | 0                          | 0                        | 0                       | 0                          | 8.03                     | 3                       | 5                          | 0                        | 0                       | 0                          | 0                                     | 0                                    | 0                                       |
| 398364617 | RAD51   | 0                          | 0                        | 0                       | 0                          | 12.75                    | 3                       | 3                          | 0                        | 0                       | 0                          | 0                                     | 0                                    | 0                                       |
| 398365445 | BEM1    | 0                          | 0                        | 0                       | 0                          | 10.89                    | 3                       | 4                          | 0                        | 0                       | 0                          | 0                                     | 0                                    | 0                                       |
| 6324824   | CLP1    | 0                          | 0                        | 0                       | 0                          | 10.79                    | 3                       | 4                          | 0                        | 0                       | 0                          | 0                                     | 0                                    | 0                                       |
| 6323772   | YMR124  | 0                          | 0                        | 0                       | 0                          | 4.14                     | 3                       | 4                          | 0                        | 0                       | 0                          | 0                                     | 0                                    | 0                                       |
| 6325420   | ORC4    | 0                          | 0                        | 0                       | 0                          | 9.07                     | 3                       | 4                          | 0                        | 0                       | 0                          | 0                                     | 0                                    | 0                                       |
| 398366267 | SCD5    | 0                          | 0                        | 0                       | 0                          | 5.28                     | 3                       | 4                          | 0                        | 0                       | 0                          | 0                                     | 0                                    | 0                                       |
| 6324327   | DOM34   | 0                          | 0                        | 0                       | 0                          | 10.62                    | 3                       | 9                          | 0                        | 0                       | 0                          | 0                                     | 0                                    | 0                                       |
| 6323429   | AFG2    | 0                          | 0                        | 0                       | 0                          | 6.92                     | 3                       | 3                          | 0                        | 0                       | 0                          | 0                                     | 0                                    | 0                                       |
| 398365705 | MCA1    | 0                          | 0                        | 0                       | 0                          | 13.89                    | 4                       | 21                         | 0                        | 0                       | 0                          | 0                                     | 0                                    | 0                                       |
| 398366069 | HGH1    | 0                          | 0                        | 0                       | 0                          | 14.21                    | 4                       | 14                         | 0                        | 0                       | 0                          | 0                                     | 0                                    | 0                                       |
| 6325299   | PUF2    | 0                          | 0                        | 0                       | 0                          | 6.23                     | 4                       | 17                         | 0                        | 0                       | 0                          | 0                                     | 0                                    | 0                                       |
| 6321269   | SUA5    | 0                          | 0                        | 0                       | 0                          | 17.61                    | 4                       | 14                         | 0                        | 0                       | 0                          | 0                                     | 0                                    | 0                                       |
| 6319902   | CTR86   | 0                          | 0                        | 0                       | 0                          | 7.10                     | 4                       | 9                          | 0                        | 0                       | 0                          | 0                                     | 0                                    | 0                                       |
| 398366309 | SIR3    | 0                          | 0                        | 0                       | 0                          | 5.21                     | 4                       | 7                          | 0                        | 0                       | 0                          | 0                                     | 0                                    | 0                                       |
| 398366425 | HRQ1    | 1                          | 0                        | 0                       | 0                          | 4.92                     | 4                       | 6                          | 0                        | 0                       | 0                          | 0                                     | 0                                    | 0                                       |









































Table S1 - Smith-Kinnaman, *et al* (2014) Abbreviations: %SC = percent sequence coverage, UP = unique peptides, PSM = peptide spectrum matches

| Accession | Acronym | %SC<br>FLAG_Rtr<br>1_1 | UP<br>FLAG_Rtr1<br>_1 | # PSM<br>FLAG_Rtr<br>1_1 | %SC<br>FLAG_Rtr1_<br>ctk1_deleti<br>on | UP<br>FLAG_Rtr<br>1_ctk1_d<br>eletion | # PSM<br>FLAG_Rtr<br>1_ctk1_d<br>eletion | %SC<br>FLAG_Rtr1<br>_2 | UP<br>FLAG_Rtr<br>1_2 | # PSM<br>FLAG_Rtr<br>1_2 | %SC<br>Rpb3_TA<br>P_WT | UP<br>Rpb3_TA<br>P_WT | # PSM<br>Rpb3_TA<br>P_WT |
|-----------|---------|------------------------|-----------------------|--------------------------|----------------------------------------|---------------------------------------|------------------------------------------|------------------------|-----------------------|--------------------------|------------------------|-----------------------|--------------------------|
| 398364847 | RTR1    | 47.79                  | 12                    | 728                      | 48.67                                  | 10                                    | 465                                      | 45.58                  | 11                    | 680                      | 43.81                  | 7                     | 20                       |
| 6320061   | RPB1    | 21.00                  | 33                    | 863                      | 13.21                                  | 18                                    | 124                                      | 19.91                  | 27                    | 406                      | 65.67                  | 128                   | 14665                    |
| 398365417 | RPB2    | 18.63                  | 20                    | 360                      | 8.33                                   | 8                                     | 54                                       | 16.34                  | 16                    | 167                      | 73.20                  | 105                   | 14108                    |
| 398364469 | RPB3    | 29.25                  | 6                     | 84                       | 9.12                                   | 2                                     | 6                                        | 35.85                  | 7                     | 42                       | 74.53                  | 26                    | 5873                     |
| 6322321   | RPB4    | 28.51                  | 3                     | 5                        | 4.98                                   | 1                                     | 2                                        | 0                      | 0                     | 0                        | 82.81                  | 18                    | 4185                     |
| 6319630   | RPB5    | 20.00                  | 3                     | 30                       | 13.02                                  | 2                                     | 7                                        | 21.86                  | 3                     | 30                       | 63.26                  | 17                    | 3182                     |
| 398366567 | RPB7    | 7.60                   | 1                     | 2                        | 0                                      | 0                                     | 0                                        | 0                      | 0                     | 0                        | 87.13                  | 13                    | 2096                     |
| 398365775 | RPB10   | 0                      | 0                     | 0                        | 0                                      | 0                                     | 0                                        | 0                      | 0                     | 0                        | 68.57                  | 6                     | 1373                     |
| 6325445   | RPB6    | 0                      | 0                     | 0                        | 14.19                                  | 1                                     | 2                                        | 14.19                  | 1                     | 3                        | 87.10                  | 12                    | 1289                     |
| 6321368   | RPB9    | 20.49                  | 2                     | 5                        | 0                                      | 0                                     | 0                                        | 0                      | 0                     | 0                        | 71.31                  | 8                     | 1230                     |
| 6324798   | RPB8    | 25.34                  | 3                     | 51                       | 0                                      | 0                                     | 0                                        | 17.12                  | 2                     | 7                        | 70.55                  | 13                    | 944                      |
| 6324569   | RPB11   | 36.67                  | 4                     | 5                        | 15.00                                  | 1                                     | 1                                        | 19.17                  | 2                     | 2                        | 94.17                  | 15                    | 895                      |
| 6323632   | SPT5    | 10.91                  | 8                     | 16                       | 0                                      | 0                                     | 0                                        | 0                      | 0                     | 0                        | 61.71                  | 52                    | 636                      |
| 6321625   | TFG1    | 5.99                   | 3                     | 4                        | 0                                      | 0                                     | 0                                        | 0                      | 0                     | 0                        | 47.07                  | 35                    | 363                      |
| 6321937   | RPB12   | 38.57                  | 2                     | 21                       | 0                                      | 0                                     | 0                                        | 28.57                  | 1                     | 44                       | 52.86                  | 4                     | 356                      |
| 398365043 | TFG2    | 3.00                   | 1                     | 1                        | 0                                      | 0                                     | 0                                        | 0                      | 0                     | 0                        | 36.25                  | 16                    | 344                      |
| 154199603 | IWR1    | 0                      | 0                     | 0                        | 0                                      | 0                                     | 0                                        | 0                      | 0                     | 0                        | 43.06                  | 12                    | 160                      |
| 398365457 | SPT4    | 0                      | 0                     | 0                        | 0                                      | 0                                     | 0                                        | 0                      | 0                     | 0                        | 65.69                  | 3                     | 130                      |
| 6325128   | TAF14   | 6.56                   | 1                     | 1                        | 0                                      | 0                                     | 0                                        | 0                      | 0                     | 0                        | 35.25                  | 6                     | 77                       |
| 398365155 | NPA3    | 11.43                  | 4                     | 4                        | 4.16                                   | 1                                     | 1                                        | 9.87                   | 3                     | 34                       | 0                      | 0                     | 0                        |
| 6323272   | GPN3    | 0                      | 0                     | 0                        | 4.78                                   | 1                                     | 1                                        | 5.15                   | 1                     | 1                        | 0                      | 0                     | 0                        |
| 6322163   | IRR1    | 0.87                   | 1                     | 1                        | 1.04                                   | 1                                     | 1                                        | 0                      | 0                     | 0                        | 0                      | 0                     | 0                        |
| 398366099 | RRP41   | 4.07                   | 1                     | 1                        | 0                                      | 0                                     | 0                                        | 0                      | 0                     | 0                        | 3.66                   | 1                     | 1                        |
| 398366555 | UBA2    | 0                      | 0                     | 0                        | 0                                      | 0                                     | 0                                        | 0                      | 0                     | 0                        | 0                      | 0                     | 0                        |
| 6323670   | TAP42   | 23.77                  | 6                     | 127                      | 6.01                                   | 2                                     | 37                                       | 15.85                  | 5                     | 43                       | 0                      | 0                     | 0                        |
| 6323004   | SSA2    | 41.16                  | 21                    | 1833                     | 45.07                                  | 19                                    | 399                                      | 44.13                  | 22                    | 613                      | 38.65                  | 17                    | 63                       |
| 6319505   | RPL4A   | 6.63                   | 2                     | 66                       | 43.09                                  | 12                                    | 417                                      | 33.98                  | 10                    | 416                      | 44.20                  | 11                    | 82                       |
| 398364991 | RPL4B   | 6.63                   | 2                     | 66                       | 38.67                                  | 11                                    | 416                                      | 33.43                  | 9                     | 388                      | 39.78                  | 9                     | 76                       |
| 398365303 | RPL43B  | 19.57                  | 1                     | 49                       | 29.35                                  | 3                                     | 168                                      | 30.43                  | 4                     | 100                      | 43.48                  | 6                     | 67                       |
| 398364349 | RPL2A   | 4.33                   | 1                     | 194                      | 32.68                                  | 6                                     | 329                                      | 27.17                  | 4                     | 299                      | 26.38                  | 5                     | 62                       |
| 6325337   | TEF1    | 17.03                  | 10                    | 430                      | 30.13                                  | 11                                    | 342                                      | 28.60                  | 10                    | 297                      | 40.61                  | 12                    | 57                       |
| 144228166 | SSA1    | 40.97                  | 21                    | 1735                     | 54.52                                  | 21                                    | 476                                      | 43.93                  | 22                    | 606                      | 32.55                  | 15                    | 57                       |
| 6319559   | RPL19A  | 19.05                  | 3                     | 49                       | 30.16                                  | 7                                     | 125                                      | 23.81                  | 4                     | 118                      | 29.63                  | 7                     | 48                       |
| 6320065   | RPL35A  | 16.67                  | 2                     | 3                        | 22.50                                  | 4                                     | 18                                       | 19.17                  | 5                     | 43                       | 34.17                  | 5                     | 48                       |
| 398365603 | RPS4A   | 19.92                  | 4                     | 12                       | 34.87                                  | 8                                     | 145                                      | 24.14                  | 4                     | 80                       | 35.63                  | 8                     | 40                       |
| 398365321 | RPS6B   | 16.53                  | 3                     | 7                        | 42.80                                  | 11                                    | 382                                      | 16.95                  | 4                     | 26                       | 40.68                  | 9                     | 38                       |
| 398364655 | SSA4    | 8.88                   | 5                     | 666                      | 9.50                                   | 5                                     | 170                                      | 6.23                   | 4                     | 124                      | 12.77                  | 7                     | 35                       |



Table S1 - Smith-Kinnaman, *et al* (2014) Abbreviations: %SC = percent sequence coverage, UP = unique peptides, PSM = peptide spectrum matches

| Accession | Acronym | %SC<br>FLAG_Rtr<br>1_1 | UP<br>FLAG_Rtr1<br>_1 | # PSM<br>FLAG_Rtr<br>1_1 | %SC<br>FLAG_Rtr1_<br>ctk1_deleti<br>on | UP<br>FLAG_Rtr<br>1_ctk1_d<br>eletion | # PSM<br>FLAG_Rtr<br>1_ctk1_d<br>eletion | %SC<br>FLAG_Rtr1<br>_2 | UP<br>FLAG_Rtr<br>1_2 | # PSM<br>FLAG_Rtr<br>1_2 | %SC<br>Rpb3_TA<br>P_WT | UP<br>Rpb3_TA<br>P_WT | # PSM<br>Rpb3_TA<br>P_WT |
|-----------|---------|------------------------|-----------------------|--------------------------|----------------------------------------|---------------------------------------|------------------------------------------|------------------------|-----------------------|--------------------------|------------------------|-----------------------|--------------------------|
| 398366603 | RPS17B  | 44.12                  | 5                     | 40                       | 45.59                                  | 6                                     | 246                                      | 31.62                  | 4                     | 85                       | 47.06                  | 7                     | 34                       |
| 6324533   | RPS15   | 16.90                  | 2                     | 15                       | 30.28                                  | 3                                     | 171                                      | 30.28                  | 3                     | 21                       | 30.28                  | 3                     | 34                       |
| 6323104   | RPL10   | 12.22                  | 3                     | 3                        | 25.34                                  | 5                                     | 110                                      | 17.19                  | 4                     | 9                        | 18.55                  | 3                     | 33                       |
| 6319396   | SSA3    | 11.09                  | 6                     | 613                      | 15.56                                  | 7                                     | 57                                       | 8.47                   | 5                     | 234                      | 9.55                   | 6                     | 33                       |
| 6321786   | RPL14B  | 17.39                  | 4                     | 82                       | 22.46                                  | 3                                     | 68                                       | 13.77                  | 2                     | 34                       | 33.33                  | 5                     | 31                       |
| 6322847   | RPL14A  | 23.91                  | 5                     | 83                       | 22.46                                  | 3                                     | 68                                       | 13.77                  | 2                     | 34                       | 33.33                  | 5                     | 31                       |
| 6324670   | RPS7A   | 30.00                  | 6                     | 195                      | 37.37                                  | 5                                     | 28                                       | 13.16                  | 2                     | 15                       | 46.32                  | 7                     | 31                       |
| 6322668   | RPL17A  | 7.07                   | 1                     | 1                        | 39.67                                  | 6                                     | 236                                      | 34.78                  | 5                     | 136                      | 35.33                  | 5                     | 27                       |
| 398365285 | CAX4    | 0                      | 0                     | 0                        | 0                                      | 0                                     | 0                                        | 0                      | 0                     | 0                        | 10.88                  | 1                     | 25                       |
| 6322284   | RPL17B  | 7.07                   | 1                     | 1                        | 39.67                                  | 6                                     | 235                                      | 34.78                  | 5                     | 116                      | 29.89                  | 4                     | 21                       |
| 398364883 | RPS7B   | 38.95                  | 7                     | 204                      | 24.21                                  | 4                                     | 49                                       | 14.21                  | 2                     | 9                        | 35.79                  | 6                     | 21                       |
| 6323791   | RPL13B  | 20.60                  | 4                     | 125                      | 29.65                                  | 7                                     | 227                                      | 34.17                  | 6                     | 40                       | 33.17                  | 5                     | 20                       |
| 6320121   | RPL13A  | 20.60                  | 4                     | 125                      | 29.65                                  | 7                                     | 227                                      | 32.66                  | 5                     | 39                       | 33.17                  | 5                     | 20                       |
| 6324120   | SSB2    | 51.71                  | 25                    | 2235                     | 35.89                                  | 15                                    | 232                                      | 35.56                  | 15                    | 238                      | 19.25                  | 8                     | 19                       |
| 6323577   | RPS1B   | 11.37                  | 3                     | 66                       | 44.71                                  | 11                                    | 295                                      | 20.78                  | 5                     | 20                       | 21.57                  | 5                     | 16                       |
| 6325157   | ATG21   | 0                      | 0                     | 0                        | 0                                      | 0                                     | 0                                        | 0                      | 0                     | 0                        | 3.83                   | 1                     | 16                       |
| 6323474   | RPS1A   | 11.37                  | 3                     | 32                       | 48.24                                  | 12                                    | 237                                      | 20.78                  | 5                     | 20                       | 16.47                  | 4                     | 15                       |
| 398364725 | RPL23B  | 5.84                   | 1                     | 1                        | 16.79                                  | 2                                     | 14                                       | 10.95                  | 1                     | 63                       | 31.39                  | 3                     | 15                       |
| 6319972   | SSB1    | 51.71                  | 25                    | 2462                     | 32.46                                  | 14                                    | 230                                      | 34.26                  | 15                    | 231                      | 15.82                  | 7                     | 15                       |
| 154200011 | RPL20B  | 20.35                  | 4                     | 106                      | 34.30                                  | 5                                     | 192                                      | 30.81                  | 5                     | 49                       | 29.07                  | 4                     | 15                       |
| 6322989   | UBI4    | 32.89                  | 2                     | 304                      | 0                                      | 0                                     | 0                                        | 50.00                  | 3                     | 12                       | 32.89                  | 2                     | 15                       |
| 9755341   | RPS16A  | 29.37                  | 4                     | 201                      | 48.25                                  | 6                                     | 47                                       | 27.27                  | 3                     | 35                       | 28.67                  | 3                     | 14                       |
| 6319378   | RPL32   | 0                      | 0                     | 0                        | 30.00                                  | 4                                     | 110                                      | 17.69                  | 2                     | 176                      | 17.69                  | 2                     | 14                       |
| 6325061   | APL5    | 6.01                   | 4                     | 5                        | 0                                      | 0                                     | 0                                        | 0                      | 0                     | 0                        | 1.93                   | 1                     | 14                       |
| 398364505 | RPS3    | 39.17                  | 8                     | 296                      | 52.92                                  | 10                                    | 454                                      | 21.67                  | 4                     | 39                       | 30.83                  | 5                     | 13                       |
| 398365351 | RPS13   | 23.84                  | 3                     | 45                       | 51.66                                  | 7                                     | 277                                      | 33.77                  | 4                     | 41                       | 33.11                  | 4                     | 13                       |
| 6324260   | RPL16B  | 17.17                  | 3                     | 12                       | 19.70                                  | 4                                     | 59                                       | 19.70                  | 4                     | 82                       | 18.69                  | 5                     | 13                       |
| 398365605 | RPS30B  | 15.87                  | 1                     | 6                        | 15.87                                  | 1                                     | 8                                        | 0                      | 0                     | 0                        | 28.57                  | 3                     | 12                       |
| 6323481   | RPL6B   | 27.27                  | 5                     | 89                       | 37.50                                  | 6                                     | 88                                       | 12.50                  | 2                     | 55                       | 16.48                  | 2                     | 11                       |
| 398365377 | RPS9B   | 32.31                  | 7                     | 80                       | 29.74                                  | 7                                     | 109                                      | 12.31                  | 2                     | 20                       | 23.08                  | 6                     | 11                       |
| 6324265   | YDJ1    | 11.25                  | 3                     | 53                       | 5.87                                   | 2                                     | 2                                        | 11.00                  | 4                     | 24                       | 28.36                  | 5                     | 11                       |
| 398364745 | ATP7    | 7.47                   | 1                     | 1                        | 0                                      | 0                                     | 0                                        | 0                      | 0                     | 0                        | 40.23                  | 5                     | 11                       |
| 6321464   | RPS25A  | 21.30                  | 3                     | 6                        | 39.81                                  | 5                                     | 49                                       | 21.30                  | 2                     | 5                        | 14.81                  | 3                     | 10                       |
| 6323077   | RPS0B   | 8.33                   | 2                     | 5                        | 0                                      | 0                                     | 0                                        | 0                      | 0                     | 0                        | 4.76                   | 1                     | 10                       |
| 398365071 | RPS11A  | 13.46                  | 2                     | 6                        | 26.28                                  | 5                                     | 22                                       | 14.10                  | 2                     | 48                       | 17.31                  | 2                     | 10                       |
| 6321653   | RPS0A   | 8.33                   | 2                     | 5                        | 0                                      | 0                                     | 0                                        | 0                      | 0                     | 0                        | 4.76                   | 1                     | 10                       |
| 6323465   | CNA1    | 2.53                   | 1                     | 1                        | 0                                      | 0                                     | 0                                        | 0                      | 0                     | 0                        | 17.36                  | 6                     | 10                       |

Table S1 - Smith-Kinnaman, *et al* (2014) Abbreviations: %SC = percent sequence coverage, UP = unique peptides, PSM = peptide spectrum matches

| Accession | Acronym | %SC<br>FLAG_Rtr<br>1_1 | UP<br>FLAG_Rtr1<br>_1 | # PSM<br>FLAG_Rtr<br>1_1 | %SC<br>FLAG_Rtr1_<br>ctk1_deleti<br>on | UP<br>FLAG_Rtr<br>1_ctk1_d<br>eletion | # PSM<br>FLAG_Rtr<br>1_ctk1_d<br>eletion | %SC<br>FLAG_Rtr1<br>_2 | UP<br>FLAG_Rtr<br>1_2 | # PSM<br>FLAG_Rtr<br>1_2 | %SC<br>Rpb3_TA<br>P_WT | UP<br>Rpb3_TA<br>P_WT | # PSM<br>Rpb3_TA<br>P_WT |
|-----------|---------|------------------------|-----------------------|--------------------------|----------------------------------------|---------------------------------------|------------------------------------------|------------------------|-----------------------|--------------------------|------------------------|-----------------------|--------------------------|
| 6321335   | RPL28   | 16.11                  | 2                     | 6                        | 18.79                                  | 3                                     | 155                                      | 17.45                  | 3                     | 22                       | 30.87                  | 5                     | 9                        |
| 6322505   | SSC1    | 29.05                  | 15                    | 568                      | 15.29                                  | 7                                     | 37                                       | 30.73                  | 13                    | 77                       | 6.27                   | 3                     | 9                        |
| 6323567   | RPL6A   | 15.34                  | 3                     | 48                       | 31.82                                  | 5                                     | 77                                       | 12.50                  | 2                     | 40                       | 8.52                   | 1                     | 8                        |
| 6321754   | RPL8A   | 30.47                  | 8                     | 88                       | 53.52                                  | 14                                    | 355                                      | 35.94                  | 10                    | 90                       | 18.36                  | 4                     | 8                        |
| 6322984   | RPL8B   | 30.47                  | 8                     | 88                       | 50.78                                  | 14                                    | 377                                      | 36.72                  | 11                    | 91                       | 18.36                  | 4                     | 8                        |
| 6323615   | RPS18B  | 29.45                  | 4                     | 91                       | 41.10                                  | 6                                     | 120                                      | 13.01                  | 2                     | 5                        | 35.62                  | 5                     | 8                        |
| 398366307 | RPA190  | 20.19                  | 28                    | 190                      | 0.72                                   | 1                                     | 1                                        | 0                      | 0                     | 0                        | 0.54                   | 1                     | 8                        |
| 6324637   | RPL3    | 20.67                  | 10                    | 27                       | 27.13                                  | 8                                     | 194                                      | 28.94                  | 9                     | 144                      | 11.37                  | 3                     | 7                        |
| 6320128   | RPL31A  | 0                      | 0                     | 0                        | 38.05                                  | 4                                     | 18                                       | 14.16                  | 1                     | 2                        | 30.97                  | 3                     | 7                        |
| 398366143 | RPL31B  | 0                      | 0                     | 0                        | 30.09                                  | 3                                     | 17                                       | 14.16                  | 1                     | 2                        | 30.97                  | 3                     | 7                        |
| 398365761 | RPS23A  | 0                      | 0                     | 0                        | 13.10                                  | 2                                     | 2                                        | 0                      | 0                     | 0                        | 26.21                  | 2                     | 7                        |
| 6322137   | RPL34B  | 6.61                   | 1                     | 32                       | 6.61                                   | 1                                     | 49                                       | 0                      | 0                     | 0                        | 20.66                  | 2                     | 7                        |
| 6321315   | RPS2    | 11.02                  | 2                     | 27                       | 44.49                                  | 9                                     | 159                                      | 13.39                  | 2                     | 48                       | 12.60                  | 2                     | 6                        |
| 6320949   | RPS8B   | 14.00                  | 2                     | 78                       | 34.50                                  | 6                                     | 280                                      | 20.50                  | 3                     | 157                      | 21.00                  | 3                     | 6                        |
| 6321798   | RPL27A  | 16.91                  | 2                     | 122                      | 37.50                                  | 6                                     | 97                                       | 34.56                  | 5                     | 68                       | 22.06                  | 3                     | 6                        |
| 6325176   | RPS9A   | 32.99                  | 7                     | 73                       | 21.32                                  | 6                                     | 99                                       | 4.06                   | 1                     | 6                        | 23.35                  | 4                     | 6                        |
| 86558907  | RHR2    | 24.40                  | 5                     | 114                      | 11.60                                  | 2                                     | 23                                       | 11.20                  | 2                     | 9                        | 15.60                  | 3                     | 6                        |
| 6322058   | RPL16A  | 21.61                  | 4                     | 10                       | 14.07                                  | 3                                     | 17                                       | 19.60                  | 4                     | 30                       | 18.59                  | 4                     | 6                        |
| 6324027   | RPS19B  | 50.00                  | 6                     | 230                      | 45.14                                  | 5                                     | 36                                       | 20.14                  | 2                     | 9                        | 24.31                  | 2                     | 6                        |
| 6323090   | RPL22A  | 18.18                  | 1                     | 29                       | 41.32                                  | 2                                     | 5                                        | 18.18                  | 1                     | 13                       | 32.23                  | 2                     | 6                        |
| 6320142   | RPS29B  | 17.86                  | 1                     | 1                        | 0                                      | 0                                     | 0                                        | 0                      | 0                     | 0                        | 17.86                  | 1                     | 6                        |
| 6324807   | KIN4    | 2.88                   | 2                     | 2                        | 0                                      | 0                                     | 0                                        | 0                      | 0                     | 0                        | 2.38                   | 1                     | 6                        |
| 6321522   | RPL11B  | 12.64                  | 2                     | 26                       | 27.59                                  | 4                                     | 102                                      | 8.05                   | 1                     | 5                        | 13.79                  | 2                     | 5                        |
| 6322583   | RPS5    | 26.22                  | 6                     | 292                      | 21.33                                  | 4                                     | 331                                      | 11.56                  | 2                     | 20                       | 12.44                  | 2                     | 5                        |
| 6325126   | RPL5    | 7.74                   | 2                     | 9                        | 21.89                                  | 4                                     | 34                                       | 21.89                  | 4                     | 29                       | 10.77                  | 2                     | 5                        |
| 6323073   | PDC1    | 27.35                  | 12                    | 175                      | 36.41                                  | 12                                    | 388                                      | 29.66                  | 10                    | 190                      | 6.04                   | 2                     | 5                        |
| 398366277 | VMA4    | 40.77                  | 8                     | 110                      | 4.72                                   | 1                                     | 4                                        | 12.45                  | 3                     | 15                       | 21.46                  | 3                     | 5                        |
| 6323824   | HOT1    | 0                      | 0                     | 0                        | 0                                      | 0                                     | 0                                        | 0                      | 0                     | 0                        | 6.40                   | 2                     | 5                        |
| 6325066   | NAB3    | 0                      | 0                     | 0                        | 0                                      | 0                                     | 0                                        | 1.87                   | 1                     | 1                        | 7.48                   | 4                     | 5                        |
| 398364517 | RPS24A  | 13.33                  | 2                     | 62                       | 37.78                                  | 5                                     | 114                                      | 11.11                  | 1                     | 38                       | 15.56                  | 2                     | 4                        |
| 6321362   | RPL7A   | 21.72                  | 4                     | 67                       | 30.74                                  | 7                                     | 129                                      | 27.05                  | 6                     | 96                       | 9.84                   | 2                     | 4                        |
| 6325058   | RPL7B   | 18.03                  | 3                     | 63                       | 30.74                                  | 7                                     | 98                                       | 23.36                  | 5                     | 92                       | 9.84                   | 2                     | 4                        |
| 37362649  | GUS1    | 15.96                  | 11                    | 104                      | 7.20                                   | 5                                     | 40                                       | 8.47                   | 5                     | 20                       | 2.82                   | 2                     | 4                        |
| 398365909 | RPL24B  | 7.74                   | 1                     | 1                        | 16.77                                  | 2                                     | 19                                       | 0                      | 0                     | 0                        | 16.13                  | 3                     | 4                        |
| 6324707   | EFT1    | 26.01                  | 20                    | 570                      | 13.90                                  | 10                                    | 71                                       | 17.93                  | 11                    | 84                       | 8.19                   | 4                     | 4                        |
| 6323376   | RPL26A  | 35.43                  | 7                     | 49                       | 30.71                                  | 5                                     | 17                                       | 18.11                  | 3                     | 48                       | 14.17                  | 2                     | 4                        |
| 116006491 | RPL26B  | 35.43                  | 7                     | 53                       | 30.71                                  | 5                                     | 17                                       | 18.11                  | 3                     | 48                       | 14.17                  | 2                     | 4                        |

Table S1 - Smith-Kinnaman, *et al* (2014) Abbreviations: %SC = percent sequence coverage, UP = unique peptides, PSM = peptide spectrum matches

| Accession | Acronym | %SC<br>FLAG_Rtr<br>1_1 | UP<br>FLAG_Rtr1<br>_1 | # PSM<br>FLAG_Rtr<br>1_1 | %SC<br>FLAG_Rtr1_<br>ctk1_deleti<br>on | UP<br>FLAG_Rtr<br>1_ctk1_d<br>eletion | # PSM<br>FLAG_Rtr<br>1_ctk1_d<br>eletion | %SC<br>FLAG_Rtr1<br>_2 | UP<br>FLAG_Rtr<br>1_2 | # PSM<br>FLAG_Rtr<br>1_2 | %SC<br>Rpb3_TA<br>P_WT | UP<br>Rpb3_TA<br>P_WT | # PSM<br>Rpb3_TA<br>P_WT |
|-----------|---------|------------------------|-----------------------|--------------------------|----------------------------------------|---------------------------------------|------------------------------------------|------------------------|-----------------------|--------------------------|------------------------|-----------------------|--------------------------|
| 6325006   | RPL36B  | 33.00                  | 4                     | 39                       | 42.00                                  | 5                                     | 298                                      | 33.00                  | 5                     | 53                       | 7.00                   | 1                     | 4                        |
| 6323848   | RPL36A  | 33.00                  | 4                     | 39                       | 33.00                                  | 4                                     | 282                                      | 23.00                  | 3                     | 51                       | 7.00                   | 1                     | 4                        |
| 398366579 | RPL12B  | 33.33                  | 4                     | 538                      | 28.48                                  | 3                                     | 144                                      | 37.58                  | 4                     | 164                      | 16.97                  | 2                     | 4                        |
| 6321540   | NOP7    | 7.93                   | 3                     | 3                        | 0                                      | 0                                     | 0                                        | 0                      | 0                     | 0                        | 2.98                   | 1                     | 4                        |
| 398365599 | PDC6    | 3.37                   | 1                     | 19                       | 3.37                                   | 1                                     | 28                                       | 4.97                   | 2                     | 66                       | 3.37                   | 1                     | 4                        |
| 6323163   | PDC5    | 7.28                   | 3                     | 35                       | 9.59                                   | 3                                     | 35                                       | 7.82                   | 2                     | 67                       | 3.37                   | 1                     | 4                        |
| 6323583   | CMP2    | 2.65                   | 1                     | 1                        | 0                                      | 0                                     | 0                                        | 0                      | 0                     | 0                        | 8.61                   | 3                     | 4                        |
| 398365991 | CLC1    | 4.29                   | 1                     | 2                        | 6.87                                   | 1                                     | 3                                        | 11.59                  | 2                     | 16                       | 12.45                  | 2                     | 4                        |
| 37362619  | RXT2    | 0                      | 0                     | 0                        | 0                                      | 0                                     | 0                                        | 0                      | 0                     | 0                        | 3.72                   | 1                     | 4                        |
| 10383793  | RPS14A  | 37.96                  | 5                     | 133                      | 19.71                                  | 4                                     | 10                                       | 29.93                  | 3                     | 4                        | 28.47                  | 2                     | 3                        |
| 6322271   | RPS22A  | 23.85                  | 3                     | 23                       | 25.38                                  | 3                                     | 24                                       | 12.31                  | 1                     | 13                       | 19.23                  | 2                     | 3                        |
| 6321407   | RPL24A  | 7.74                   | 2                     | 2                        | 22.58                                  | 3                                     | 18                                       | 0                      | 0                     | 0                        | 9.68                   | 2                     | 3                        |
| 6323357   | RPL38   | 32.05                  | 2                     | 95                       | 28.21                                  | 2                                     | 16                                       | 19.23                  | 1                     | 11                       | 19.23                  | 1                     | 3                        |
| 398366183 | HTB1    | 13.74                  | 2                     | 11                       | 0                                      | 0                                     | 0                                        | 0                      | 0                     | 0                        | 11.45                  | 1                     | 3                        |
| 398364287 | GCN1    | 8.57                   | 20                    | 78                       | 6.29                                   | 12                                    | 47                                       | 6.96                   | 13                    | 38                       | 0.60                   | 1                     | 3                        |
| 6320016   | VMA1    | 20.63                  | 21                    | 108                      | 5.32                                   | 4                                     | 8                                        | 11.95                  | 9                     | 75                       | 1.87                   | 1                     | 3                        |
| 14318481  | TUB2    | 13.79                  | 6                     | 99                       | 8.75                                   | 3                                     | 21                                       | 6.56                   | 2                     | 7                        | 15.10                  | 3                     | 3                        |
| 398364585 | KAR2    | 14.66                  | 8                     | 99                       | 15.69                                  | 8                                     | 154                                      | 8.21                   | 4                     | 41                       | 1.76                   | 1                     | 3                        |
| 6323196   | RPS31   | 10.53                  | 1                     | 2                        | 0                                      | 0                                     | 0                                        | 0                      | 0                     | 0                        | 22.37                  | 1                     | 3                        |
| 6321013   | PAB1    | 19.58                  | 10                    | 168                      | 9.01                                   | 4                                     | 12                                       | 5.55                   | 2                     | 9                        | 4.51                   | 2                     | 3                        |
| 6324993   | FUM1    | 9.43                   | 4                     | 29                       | 0                                      | 0                                     | 0                                        | 3.07                   | 1                     | 2                        | 3.28                   | 1                     | 3                        |
| 398366075 | RPS29A  | 14.29                  | 1                     | 1                        | 14.29                                  | 1                                     | 1                                        | 0                      | 0                     | 0                        | 17.86                  | 1                     | 3                        |
| 6322755   | YJU2    | 4.32                   | 1                     | 1                        | 0                                      | 0                                     | 0                                        | 0                      | 0                     | 0                        | 12.23                  | 2                     | 3                        |
| 398366059 | PLP2    | 3.50                   | 1                     | 1                        | 0                                      | 0                                     | 0                                        | 0                      | 0                     | 0                        | 3.50                   | 1                     | 3                        |
| 6320718   | SMT3    | 10.89                  | 1                     | 51                       | 0                                      | 0                                     | 0                                        | 0                      | 0                     | 0                        | 32.67                  | 2                     | 3                        |
| 398365031 | YBR139W | 0                      | 0                     | 0                        | 0                                      | 0                                     | 0                                        | 0                      | 0                     | 0                        | 6.10                   | 2                     | 3                        |
| 6321850   | FYV4    | 0                      | 0                     | 0                        | 0                                      | 0                                     | 0                                        | 0                      | 0                     | 0                        | 14.62                  | 1                     | 3                        |
| 398366083 | TDH3    | 52.11                  | 14                    | 985                      | 58.73                                  | 13                                    | 441                                      | 34.64                  | 10                    | 475                      | 7.53                   | 2                     | 2                        |
| 6319279   | CDC19   | 47.00                  | 22                    | 1858                     | 44.00                                  | 19                                    | 634                                      | 31.00                  | 14                    | 344                      | 3.60                   | 1                     | 2                        |
| 6322468   | TDH2    | 44.58                  | 12                    | 956                      | 35.84                                  | 9                                     | 361                                      | 27.71                  | 8                     | 453                      | 7.53                   | 2                     | 2                        |
| 6321249   | RPS26A  | 20.17                  | 2                     | 121                      | 20.17                                  | 2                                     | 153                                      | 12.61                  | 1                     | 3                        | 20.17                  | 2                     | 2                        |
| 6321772   | RPS20   | 38.02                  | 5                     | 361                      | 31.40                                  | 3                                     | 14                                       | 9.92                   | 1                     | 32                       | 9.92                   | 1                     | 2                        |
| 14318474  | SEC53   | 25.20                  | 6                     | 25                       | 32.68                                  | 5                                     | 15                                       | 11.81                  | 2                     | 21                       | 5.51                   | 1                     | 2                        |
| 6320589   | YRA1    | 22.12                  | 5                     | 187                      | 9.73                                   | 2                                     | 13                                       | 5.75                   | 1                     | 2                        | 5.75                   | 1                     | 2                        |
| 6320805   | ECM10   | 4.50                   | 4                     | 64                       | 0                                      | 0                                     | 0                                        | 5.12                   | 2                     | 6                        | 1.40                   | 1                     | 2                        |
| 6323776   | ECM16   | 1.66                   | 2                     | 2                        | 0                                      | 0                                     | 0                                        | 0                      | 0                     | 0                        | 1.10                   | 1                     | 2                        |
| 6320596   | RVS167  | 9.75                   | 3                     | 5                        | 0                                      | 0                                     | 0                                        | 14.94                  | 4                     | 20                       | 5.19                   | 2                     | 2                        |

Table S1 - Smith-Kinnaman, *et al* (2014) Abbreviations: %SC = percent sequence coverage, UP = unique peptides, PSM = peptide spectrum matches

| Accession | Acronym  | %SC<br>FLAG_Rtr<br>1_1 | UP<br>FLAG_Rtr1<br>_1 | # PSM<br>FLAG_Rtr<br>1_1 | %SC<br>FLAG_Rtr1_<br>ctk1_deleti<br>on | UP<br>FLAG_Rtr<br>1_ctk1_d<br>eletion | # PSM<br>FLAG_Rtr<br>1_ctk1_d<br>eletion | %SC<br>FLAG_Rtr1<br>_2 | UP<br>FLAG_Rtr<br>1_2 | # PSM<br>FLAG_Rtr<br>1_2 | %SC<br>Rpb3_TA<br>P_WT | UP<br>Rpb3_TA<br>P_WT | # PSM<br>Rpb3_TA<br>P_WT |
|-----------|----------|------------------------|-----------------------|--------------------------|----------------------------------------|---------------------------------------|------------------------------------------|------------------------|-----------------------|--------------------------|------------------------|-----------------------|--------------------------|
| 398366359 | SLH1     | 0.51                   | 1                     | 1                        | 0                                      | 0                                     | 0                                        | 0                      | 0                     | 0                        | 2.80                   | 2                     | 2                        |
| 6324321   | SIS1     | 25.00                  | 5                     | 10                       | 6.53                                   | 2                                     | 4                                        | 12.22                  | 3                     | 5                        | 5.97                   | 1                     | 2                        |
| 6319447   | NCL1     | 17.54                  | 10                    | 77                       | 1.90                                   | 1                                     | 1                                        | 0                      | 0                     | 0                        | 5.56                   | 2                     | 2                        |
| 6323112   | EMP70    | 4.35                   | 2                     | 2                        | 2.40                                   | 1                                     | 12                                       | 2.55                   | 1                     | 11                       | 3.15                   | 1                     | 2                        |
| 6324595   | SFM1     | 3.29                   | 1                     | 1                        | 0                                      | 0                                     | 0                                        | 0                      | 0                     | 0                        | 12.68                  | 1                     | 2                        |
| 330443411 | UBP13    | 1.07                   | 1                     | 1                        | 0                                      | 0                                     | 0                                        | 0                      | 0                     | 0                        | 3.21                   | 1                     | 2                        |
| 6323868   | EFR3     | 3.58                   | 2                     | 4                        | 0                                      | 0                                     | 0                                        | 0                      | 0                     | 0                        | 2.05                   | 1                     | 2                        |
| 330443676 | CDC34    | 8.27                   | 4                     | 5                        | 0                                      | 0                                     | 0                                        | 0                      | 0                     | 0                        | 2.69                   | 1                     | 2                        |
| 6320615   | TRS120   | 0                      | 0                     | 0                        | 0                                      | 0                                     | 0                                        | 0                      | 0                     | 0                        | 1.16                   | 1                     | 2                        |
| 6323487   | FMP27    | 0                      | 0                     | 0                        | 0                                      | 0                                     | 0                                        | 0                      | 0                     | 0                        | 1.14                   | 2                     | 2                        |
| 6320231   | REG1     | 0                      | 0                     | 0                        | 0                                      | 0                                     | 0                                        | 1.28                   | 1                     | 1                        | 1.58                   | 1                     | 2                        |
| 6324585   | AUS1     | 0                      | 0                     | 0                        | 1.08                                   | 1                                     | 5                                        | 3.59                   | 3                     | 4                        | 1.15                   | 1                     | 2                        |
| 6325048   | RKM1     | 3.43                   | 2                     | 2                        | 0                                      | 0                                     | 0                                        | 0                      | 0                     | 0                        | 5.32                   | 2                     | 2                        |
| 6323732   | SEG1     | 5.52                   | 4                     | 6                        | 0                                      | 0                                     | 0                                        | 0                      | 0                     | 0                        | 1.56                   | 1                     | 2                        |
| 398364779 | YGL041W- | 0                      | 0                     | 0                        | 0                                      | 0                                     | 0                                        | 0                      | 0                     | 0                        | 13.64                  | 1                     | 2                        |
| 398365827 | CAF130   | 0                      | 0                     | 0                        | 0                                      | 0                                     | 0                                        | 0                      | 0                     | 0                        | 1.07                   | 1                     | 2                        |
| 6325063   | RSA1     | 0                      | 0                     | 0                        | 0                                      | 0                                     | 0                                        | 0                      | 0                     | 0                        | 6.30                   | 1                     | 2                        |
| 398365559 | MSH6     | 0                      | 0                     | 0                        | 0                                      | 0                                     | 0                                        | 0                      | 0                     | 0                        | 1.85                   | 2                     | 2                        |
| 398365727 | YNR034W- | 0                      | 0                     | 0                        | 0                                      | 0                                     | 0                                        | 0                      | 0                     | 0                        | 11.22                  | 1                     | 2                        |
| 6323683   | YET2     | 0                      | 0                     | 0                        | 0                                      | 0                                     | 0                                        | 0                      | 0                     | 0                        | 11.88                  | 1                     | 2                        |
| 330443366 | GPB2     | 0                      | 0                     | 0                        | 0                                      | 0                                     | 0                                        | 0                      | 0                     | 0                        | 1.14                   | 1                     | 2                        |
| 6325012   | HUT1     | 0                      | 0                     | 0                        | 0                                      | 0                                     | 0                                        | 0                      | 0                     | 0                        | 6.19                   | 1                     | 2                        |
| 99030927  | KKQ8     | 0                      | 0                     | 0                        | 0                                      | 0                                     | 0                                        | 0                      | 0                     | 0                        | 1.10                   | 1                     | 2                        |
| 398364567 | MAD1     | 0                      | 0                     | 0                        | 0                                      | 0                                     | 0                                        | 0                      | 0                     | 0                        | 2.14                   | 2                     | 2                        |
| 6320763   | RMD6     | 0                      | 0                     | 0                        | 0                                      | 0                                     | 0                                        | 0                      | 0                     | 0                        | 6.49                   | 1                     | 2                        |
| 398365009 | MEC1     | 24.58                  | 54                    | 2197                     | 8.91                                   | 17                                    | 163                                      | 17.53                  | 36                    | 383                      | 0.68                   | 1                     | 1                        |
| 398364407 | RPL9A    | 33.51                  | 4                     | 41                       | 24.08                                  | 4                                     | 56                                       | 25.65                  | 4                     | 105                      | 5.24                   | 1                     | 1                        |
| 6324298   | HHF2     | 21.36                  | 2                     | 7                        | 33.01                                  | 3                                     | 131                                      | 40.78                  | 4                     | 110                      | 11.65                  | 1                     | 1                        |
| 6324262   | RPL9B    | 33.51                  | 4                     | 30                       | 14.14                                  | 3                                     | 43                                       | 15.71                  | 3                     | 100                      | 5.24                   | 1                     | 1                        |
| 398364523 | TDH1     | 38.25                  | 11                    | 237                      | 39.46                                  | 10                                    | 369                                      | 23.49                  | 7                     | 348                      | 4.22                   | 1                     | 1                        |
| 398364951 | VMA2     | 36.17                  | 14                    | 511                      | 22.63                                  | 8                                     | 39                                       | 24.18                  | 9                     | 53                       | 2.71                   | 1                     | 1                        |
| 6321333   | ARC1     | 14.63                  | 5                     | 47                       | 7.18                                   | 2                                     | 2                                        | 7.18                   | 2                     | 13                       | 4.26                   | 1                     | 1                        |
| 6321408   | RPL30    | 44.76                  | 3                     | 108                      | 39.05                                  | 4                                     | 89                                       | 27.62                  | 3                     | 36                       | 11.43                  | 1                     | 1                        |
| 6324445   | RPL25    | 25.35                  | 4                     | 68                       | 34.51                                  | 4                                     | 182                                      | 42.25                  | 5                     | 31                       | 9.15                   | 1                     | 1                        |
| 6325114   | RPL33A   | 24.30                  | 2                     | 54                       | 29.91                                  | 3                                     | 83                                       | 14.95                  | 1                     | 58                       | 10.28                  | 1                     | 1                        |
| 398365881 | RPL33B   | 9.35                   | 1                     | 2                        | 29.91                                  | 3                                     | 63                                       | 14.95                  | 1                     | 51                       | 10.28                  | 1                     | 1                        |
| 398364339 | THS1     | 17.44                  | 11                    | 51                       | 3.68                                   | 2                                     | 7                                        | 5.99                   | 3                     | 6                        | 1.23                   | 1                     | 1                        |

Table S1 - Smith-Kinnaman, *et al* (2014) Abbreviations: %SC = percent sequence coverage, UP = unique peptides, PSM = peptide spectrum matches

| Accession | Acronym | %SC<br>FLAG_Rtr<br>1_1 | UP<br>FLAG_Rtr1<br>_1 | # PSM<br>FLAG_Rtr<br>1_1 | %SC<br>FLAG_Rtr1_<br>ctk1_deleti<br>on | UP<br>FLAG_Rtr<br>1_ctk1_d<br>eletion | # PSM<br>FLAG_Rtr<br>1_ctk1_d<br>eletion | %SC<br>FLAG_Rtr1<br>_2 | UP<br>FLAG_Rtr<br>1_2 | # PSM<br>FLAG_Rtr<br>1_2 | %SC<br>Rpb3_TA<br>P_WT | UP<br>Rpb3_TA<br>P_WT | # PSM<br>Rpb3_TA<br>P_WT |
|-----------|---------|------------------------|-----------------------|--------------------------|----------------------------------------|---------------------------------------|------------------------------------------|------------------------|-----------------------|--------------------------|------------------------|-----------------------|--------------------------|
| 330443609 | URA2    | 16.26                  | 30                    | 229                      | 6.01                                   | 10                                    | 24                                       | 4.29                   | 7                     | 21                       | 0.59                   | 1                     | 1                        |
| 6323209   | SAM1    | 13.61                  | 5                     | 108                      | 12.04                                  | 3                                     | 22                                       | 10.99                  | 3                     | 24                       | 2.36                   | 1                     | 1                        |
| 398364415 | HXK1    | 7.01                   | 3                     | 20                       | 6.80                                   | 3                                     | 38                                       | 12.99                  | 4                     | 11                       | 3.71                   | 1                     | 1                        |
| 6321232   | CHC1    | 8.65                   | 13                    | 75                       | 7.20                                   | 10                                    | 21                                       | 6.17                   | 8                     | 51                       | 0.73                   | 1                     | 1                        |
| 6322352   | UTP10   | 2.94                   | 4                     | 5                        | 0                                      | 0                                     | 0                                        | 0.90                   | 1                     | 1                        | 0.90                   | 1                     | 1                        |
| 398366655 | SAM2    | 11.20                  | 4                     | 36                       | 9.11                                   | 2                                     | 17                                       | 8.07                   | 2                     | 14                       | 2.34                   | 1                     | 1                        |
| 6322115   | RPN2    | 15.56                  | 13                    | 33                       | 6.67                                   | 5                                     | 11                                       | 6.03                   | 5                     | 15                       | 1.06                   | 1                     | 1                        |
| 6320073   | RPP1B   | 15.09                  | 1                     | 178                      | 15.09                                  | 1                                     | 12                                       | 15.09                  | 1                     | 2                        | 15.09                  | 1                     | 1                        |
| 6320122   | RPP1A   | 25.47                  | 2                     | 4                        | 0                                      | 0                                     | 0                                        | 0                      | 0                     | 0                        | 20.75                  | 1                     | 1                        |
| 6323693   | ERB1    | 3.97                   | 3                     | 9                        | 0                                      | 0                                     | 0                                        | 0                      | 0                     | 0                        | 2.60                   | 1                     | 1                        |
| 6320784   | VMA8    | 3.91                   | 1                     | 8                        | 0                                      | 0                                     | 0                                        | 4.30                   | 1                     | 3                        | 4.30                   | 1                     | 1                        |
| 6323087   | SHM2    | 19.83                  | 9                     | 69                       | 6.18                                   | 2                                     | 14                                       | 8.74                   | 3                     | 32                       | 1.92                   | 1                     | 1                        |
| 6320119   | SUB2    | 4.26                   | 2                     | 3                        | 7.62                                   | 3                                     | 38                                       | 3.36                   | 1                     | 1                        | 7.17                   | 1                     | 1                        |
| 6320573   | ESF1    | 7.64                   | 4                     | 4                        | 0                                      | 0                                     | 0                                        | 0                      | 0                     | 0                        | 2.39                   | 1                     | 1                        |
| 6323179   | STM1    | 13.92                  | 2                     | 5                        | 0                                      | 0                                     | 0                                        | 7.33                   | 1                     | 11                       | 8.79                   | 1                     | 1                        |
| 398366241 | SEN1    | 0.49                   | 1                     | 1                        | 0                                      | 0                                     | 0                                        | 0                      | 0                     | 0                        | 0.58                   | 1                     | 1                        |
| 6323763   | ASC1    | 20.06                  | 6                     | 254                      | 3.76                                   | 1                                     | 2                                        | 4.70                   | 1                     | 1                        | 4.70                   | 1                     | 1                        |
| 6324772   | BFR1    | 17.87                  | 7                     | 28                       | 2.55                                   | 1                                     | 3                                        | 4.04                   | 1                     | 2                        | 3.19                   | 1                     | 1                        |
| 6320175   | ARP2    | 6.91                   | 2                     | 9                        | 0                                      | 0                                     | 0                                        | 11.25                  | 3                     | 6                        | 5.12                   | 1                     | 1                        |
| 398366669 | EMI2    | 0                      | 0                     | 0                        | 0                                      | 0                                     | 0                                        | 0                      | 0                     | 0                        | 2.80                   | 1                     | 1                        |
| 6323389   | RSC2    | 0                      | 0                     | 0                        | 0                                      | 0                                     | 0                                        | 0                      | 0                     | 0                        | 2.02                   | 1                     | 1                        |
| 6324663   | VPS21   | 5.24                   | 1                     | 1                        | 12.38                                  | 2                                     | 4                                        | 7.14                   | 1                     | 1                        | 8.57                   | 1                     | 1                        |
| 6319543   | TAT1    | 2.10                   | 1                     | 1                        | 0                                      | 0                                     | 0                                        | 6.46                   | 3                     | 7                        | 4.36                   | 1                     | 1                        |
| 6325417   | KRE6    | 7.92                   | 4                     | 59                       | 2.08                                   | 1                                     | 1                                        | 6.39                   | 3                     | 11                       | 2.64                   | 1                     | 1                        |
| 6324021   | KRI1    | 6.09                   | 3                     | 8                        | 0                                      | 0                                     | 0                                        | 1.69                   | 1                     | 1                        | 2.20                   | 1                     | 1                        |
| 6323454   | YLR422W | 0                      | 0                     | 0                        | 0                                      | 0                                     | 0                                        | 0.47                   | 1                     | 1                        | 0.67                   | 1                     | 1                        |
| 6319756   | PAF1    | 24.04                  | 7                     | 65                       | 0                                      | 0                                     | 0                                        | 0                      | 0                     | 0                        | 2.25                   | 1                     | 1                        |
| 6323725   | SEC14   | 8.55                   | 4                     | 10                       | 3.29                                   | 1                                     | 1                                        | 0                      | 0                     | 0                        | 7.57                   | 1                     | 1                        |
| 6323368   | SGD1    | 3.89                   | 3                     | 4                        | 0                                      | 0                                     | 0                                        | 0                      | 0                     | 0                        | 2.45                   | 1                     | 1                        |
| 6322598   | IML1    | 4.99                   | 6                     | 11                       | 0                                      | 0                                     | 0                                        | 0                      | 0                     | 0                        | 1.14                   | 1                     | 1                        |
| 398366503 | YDR341C | 7.74                   | 4                     | 13                       | 0                                      | 0                                     | 0                                        | 0                      | 0                     | 0                        | 1.65                   | 1                     | 1                        |
| 6320423   | RAD9    | 0                      | 0                     | 0                        | 0                                      | 0                                     | 0                                        | 0                      | 0                     | 0                        | 1.45                   | 1                     | 1                        |
| 6325147   | GDE1    | 10.87                  | 10                    | 38                       | 0                                      | 0                                     | 0                                        | 1.23                   | 1                     | 1                        | 1.55                   | 1                     | 1                        |
| 6319585   | CMD1    | 38.10                  | 4                     | 19                       | 8.84                                   | 1                                     | 2                                        | 16.33                  | 2                     | 6                        | 8.84                   | 1                     | 1                        |
| 6322946   | PTR2    | 0                      | 0                     | 0                        | 0                                      | 0                                     | 0                                        | 8.65                   | 3                     | 42                       | 3.66                   | 1                     | 1                        |
| 398366323 | GND2    | 4.47                   | 2                     | 79                       | 2.03                                   | 1                                     | 6                                        | 0                      | 0                     | 0                        | 5.08                   | 1                     | 1                        |
| 6324231   | RAS2    | 18.32                  | 4                     | 4                        | 0                                      | 0                                     | 0                                        | 0                      | 0                     | 0                        | 4.66                   | 1                     | 1                        |

Table S1 - Smith-Kinnaman, *et al* (2014) Abbreviations: %SC = percent sequence coverage, UP = unique peptides, PSM = peptide spectrum matches

| Accession | Acronym | %SC<br>FLAG_Rtr<br>1_1 | UP<br>FLAG_Rtr1<br>_1 | # PSM<br>FLAG_Rtr<br>1_1 | %SC<br>FLAG_Rtr1_<br>ctk1_deleti<br>on | UP<br>FLAG_Rtr<br>1_ctk1_d<br>eletion | # PSM<br>FLAG_Rtr<br>1_ctk1_d<br>eletion | %SC<br>FLAG_Rtr1<br>_2 | UP<br>FLAG_Rtr<br>1_2 | # PSM<br>FLAG_Rtr<br>1_2 | %SC<br>Rpb3_TA<br>P_WT | UP<br>Rpb3_TA<br>P_WT | # PSM<br>Rpb3_TA<br>P_WT |
|-----------|---------|------------------------|-----------------------|--------------------------|----------------------------------------|---------------------------------------|------------------------------------------|------------------------|-----------------------|--------------------------|------------------------|-----------------------|--------------------------|
| 6320637   | TIF35   | 15.33                  | 3                     | 6                        | 0                                      | 0                                     | 0                                        | 0                      | 0                     | 0                        | 2.55                   | 1                     | 1                        |
| 398364223 | NPR2    | 7.80                   | 4                     | 13                       | 0                                      | 0                                     | 0                                        | 0                      | 0                     | 0                        | 2.44                   | 1                     | 1                        |
| 6325390   | SPN1    | 13.66                  | 5                     | 14                       | 0                                      | 0                                     | 0                                        | 0                      | 0                     | 0                        | 3.41                   | 1                     | 1                        |
| 6324578   | DNL4    | 0                      | 0                     | 0                        | 0                                      | 0                                     | 0                                        | 0                      | 0                     | 0                        | 1.69                   | 1                     | 1                        |
| 6319291   | FRT2    | 0                      | 0                     | 0                        | 0                                      | 0                                     | 0                                        | 0                      | 0                     | 0                        | 2.84                   | 1                     | 1                        |
| 6322242   | HXT9    | 0                      | 0                     | 0                        | 0                                      | 0                                     | 0                                        | 0                      | 0                     | 0                        | 4.06                   | 1                     | 1                        |
| 6322272   | RPL39   | 0                      | 0                     | 0                        | 0                                      | 0                                     | 0                                        | 0                      | 0                     | 0                        | 15.69                  | 1                     | 1                        |
| 14318518  | VTC2    | 1.81                   | 1                     | 1                        | 1.45                                   | 1                                     | 1                                        | 6.52                   | 3                     | 3                        | 1.57                   | 1                     | 1                        |
| 330443752 | THI22   | 0                      | 0                     | 0                        | 1.75                                   | 1                                     | 12                                       | 3.15                   | 2                     | 5                        | 2.97                   | 1                     | 1                        |
| 6325175   | MOT1    | 0.54                   | 1                     | 1                        | 1.12                                   | 1                                     | 1                                        | 0                      | 0                     | 0                        | 0.80                   | 1                     | 1                        |
| 6322796   | DEF1    | 6.64                   | 3                     | 7                        | 1.08                                   | 1                                     | 1                                        | 0                      | 0                     | 0                        | 4.20                   | 1                     | 1                        |
| 398365059 | PTK2    | 1.47                   | 1                     | 1                        | 0                                      | 0                                     | 0                                        | 0                      | 0                     | 0                        | 2.81                   | 1                     | 1                        |
| 6320345   | DOP1    | 1.88                   | 2                     | 2                        | 0                                      | 0                                     | 0                                        | 0                      | 0                     | 0                        | 0.71                   | 1                     | 1                        |
| 6323863   | HFA1    | 0.52                   | 1                     | 2                        | 0                                      | 0                                     | 0                                        | 0                      | 0                     | 0                        | 1.08                   | 1                     | 1                        |
| 6322948   | MLP1    | 1.12                   | 2                     | 2                        | 0                                      | 0                                     | 0                                        | 0                      | 0                     | 0                        | 0.64                   | 1                     | 1                        |
| 6322999   | FRA1    | 2.94                   | 2                     | 2                        | 0                                      | 0                                     | 0                                        | 0                      | 0                     | 0                        | 2.27                   | 1                     | 1                        |
| 6324491   | IRA2    | 0.23                   | 1                     | 2                        | 0                                      | 0                                     | 0                                        | 0                      | 0                     | 0                        | 0.23                   | 1                     | 1                        |
| 6324215   | RPC19   | 37.32                  | 4                     | 11                       | 0                                      | 0                                     | 0                                        | 0                      | 0                     | 0                        | 10.56                  | 1                     | 1                        |
| 6320419   | UPC2    | 0                      | 0                     | 0                        | 0                                      | 0                                     | 0                                        | 0                      | 0                     | 0                        | 3.40                   | 1                     | 1                        |
| 398364627 | RDH54   | 0                      | 0                     | 0                        | 0                                      | 0                                     | 0                                        | 0                      | 0                     | 0                        | 2.82                   | 1                     | 1                        |
| 6321752   | VMR1    | 0                      | 0                     | 0                        | 0                                      | 0                                     | 0                                        | 0                      | 0                     | 0                        | 0.75                   | 1                     | 1                        |
| 6321793   | TIM10   | 0                      | 0                     | 0                        | 0                                      | 0                                     | 0                                        | 0                      | 0                     | 0                        | 7.53                   | 1                     | 1                        |
| 6322032   | BNR1    | 0                      | 0                     | 0                        | 0                                      | 0                                     | 0                                        | 0                      | 0                     | 0                        | 1.09                   | 1                     | 1                        |
| 6325074   | RTT10   | 0                      | 0                     | 0                        | 0                                      | 0                                     | 0                                        | 0                      | 0                     | 0                        | 0.69                   | 1                     | 1                        |
| 6325235   | RAD1    | 0                      | 0                     | 0                        | 0                                      | 0                                     | 0                                        | 0                      | 0                     | 0                        | 1.82                   | 1                     | 1                        |
| 6323869   | CEF1    | 3.39                   | 1                     | 1                        | 0                                      | 0                                     | 0                                        | 2.20                   | 1                     | 1                        | 2.20                   | 1                     | 1                        |
| 6323917   | TPS3    | 4.46                   | 4                     | 6                        | 0                                      | 0                                     | 0                                        | 1.61                   | 1                     | 1                        | 2.47                   | 1                     | 1                        |
| 6321552   | SPT6    | 8.34                   | 11                    | 17                       | 0                                      | 0                                     | 0                                        | 1.24                   | 1                     | 1                        | 0.69                   | 1                     | 1                        |
| 6320853   | BIM1    | 0                      | 0                     | 0                        | 0                                      | 0                                     | 0                                        | 4.65                   | 1                     | 1                        | 4.07                   | 1                     | 1                        |
| 398364243 | YEL043W | 0                      | 0                     | 0                        | 0                                      | 0                                     | 0                                        | 1.78                   | 1                     | 1                        | 1.15                   | 1                     | 1                        |
| 6320027   | DLD1    | 0                      | 0                     | 0                        | 0                                      | 0                                     | 0                                        | 2.21                   | 1                     | 1                        | 3.58                   | 1                     | 1                        |
| 6323356   | PEX30   | 0                      | 0                     | 0                        | 0                                      | 0                                     | 0                                        | 3.44                   | 1                     | 1                        | 3.25                   | 1                     | 1                        |
| 6320799   | ANP1    | 0                      | 0                     | 0                        | 0                                      | 0                                     | 0                                        | 3.60                   | 1                     | 2                        | 4.40                   | 1                     | 1                        |
| 6324393   | YNR065C | 3.14                   | 3                     | 57                       | 0                                      | 0                                     | 0                                        | 1.25                   | 1                     | 7                        | 1.70                   | 1                     | 1                        |
| 6323266   | THI7    | 0                      | 0                     | 0                        | 0                                      | 0                                     | 0                                        | 5.02                   | 2                     | 8                        | 6.02                   | 1                     | 1                        |
| 6323445   | YLR413W | 2.96                   | 2                     | 2                        | 0                                      | 0                                     | 0                                        | 5.78                   | 3                     | 14                       | 2.52                   | 1                     | 1                        |
| 398364667 | THO2    | 0.63                   | 1                     | 1                        | 0.75                                   | 1                                     | 1                                        | 0                      | 0                     | 0                        | 1.19                   | 1                     | 1                        |

Table S1 - Smith-Kinnaman, *et al* (2014) Abbreviations: %SC = percent sequence coverage, UP = unique peptides, PSM = peptide spectrum matches

| Accession | Acronym  | %SC<br>FLAG_Rtr<br>1_1 | UP<br>FLAG_Rtr1<br>_1 | # PSM<br>FLAG_Rtr<br>1_1 | %SC<br>FLAG_Rtr1_<br>ctk1_deleti<br>on | UP<br>FLAG_Rtr<br>1_ctk1_d<br>eletion | # PSM<br>FLAG_Rtr<br>1_ctk1_d<br>eletion | %SC<br>FLAG_Rtr1<br>_2 | UP<br>FLAG_Rtr<br>1_2 | # PSM<br>FLAG_Rtr<br>1_2 | %SC<br>Rpb3_TA<br>P_WT | UP<br>Rpb3_TA<br>P_WT | # PSM<br>Rpb3_TA<br>P_WT |
|-----------|----------|------------------------|-----------------------|--------------------------|----------------------------------------|---------------------------------------|------------------------------------------|------------------------|-----------------------|--------------------------|------------------------|-----------------------|--------------------------|
| 37362637  | JIP4     | 1.48                   | 1                     | 1                        | 1.03                                   | 1                                     | 1                                        | 0                      | 0                     | 0                        | 1.14                   | 1                     | 1                        |
| 398364707 | AAC3     | 3.58                   | 1                     | 1                        | 6.19                                   | 2                                     | 2                                        | 0                      | 0                     | 0                        | 8.79                   | 1                     | 1                        |
| 6322570   | YMR1     | 1.02                   | 1                     | 1                        | 1.02                                   | 1                                     | 2                                        | 0                      | 0                     | 0                        | 1.74                   | 1                     | 1                        |
| 6324879   | ISW2     | 1.34                   | 1                     | 1                        | 0                                      | 0                                     | 0                                        | 0                      | 0                     | 0                        | 2.23                   | 1                     | 1                        |
| 10383772  | LEU2     | 6.32                   | 1                     | 1                        | 0                                      | 0                                     | 0                                        | 0                      | 0                     | 0                        | 6.32                   | 1                     | 1                        |
| 6322079   | HOS4     | 0.92                   | 1                     | 1                        | 0                                      | 0                                     | 0                                        | 0                      | 0                     | 0                        | 2.49                   | 1                     | 1                        |
| 6321210   | VID30    | 1.36                   | 1                     | 1                        | 0                                      | 0                                     | 0                                        | 0                      | 0                     | 0                        | 2.19                   | 1                     | 1                        |
| 398365701 | YNR029C  | 2.10                   | 1                     | 1                        | 0                                      | 0                                     | 0                                        | 0                      | 0                     | 0                        | 4.20                   | 1                     | 1                        |
| 6320692   | VPS52    | 1.40                   | 1                     | 1                        | 0                                      | 0                                     | 0                                        | 0                      | 0                     | 0                        | 2.03                   | 1                     | 1                        |
| 398365525 | SMD1     | 6.16                   | 1                     | 1                        | 0                                      | 0                                     | 0                                        | 0                      | 0                     | 0                        | 23.29                  | 1                     | 1                        |
| 6322086   | SLM1     | 1.60                   | 1                     | 1                        | 0                                      | 0                                     | 0                                        | 0                      | 0                     | 0                        | 1.75                   | 1                     | 1                        |
| 398364897 | CBP6     | 6.79                   | 1                     | 1                        | 0                                      | 0                                     | 0                                        | 0                      | 0                     | 0                        | 9.26                   | 1                     | 1                        |
| 6323726   | NAM7     | 0.93                   | 1                     | 1                        | 0                                      | 0                                     | 0                                        | 0                      | 0                     | 0                        | 1.75                   | 1                     | 1                        |
| 6324982   | SAM4     | 3.08                   | 1                     | 1                        | 0                                      | 0                                     | 0                                        | 0                      | 0                     | 0                        | 5.85                   | 1                     | 1                        |
| 6320324   | VBA4     | 1.69                   | 1                     | 1                        | 0                                      | 0                                     | 0                                        | 0                      | 0                     | 0                        | 3.78                   | 1                     | 1                        |
| 6324612   | HIR2     | 1.26                   | 1                     | 1                        | 0                                      | 0                                     | 0                                        | 0                      | 0                     | 0                        | 2.29                   | 1                     | 1                        |
| 6324981   | SAM3     | 2.39                   | 1                     | 1                        | 0                                      | 0                                     | 0                                        | 0                      | 0                     | 0                        | 3.24                   | 1                     | 1                        |
| 6325379   | AXL1     | 0.99                   | 1                     | 1                        | 0                                      | 0                                     | 0                                        | 0                      | 0                     | 0                        | 0.91                   | 1                     | 1                        |
| 6321020   | BRR2     | 0.46                   | 1                     | 1                        | 0                                      | 0                                     | 0                                        | 0                      | 0                     | 0                        | 0.83                   | 1                     | 1                        |
| 6324694   | GCY1     | 3.21                   | 1                     | 1                        | 0                                      | 0                                     | 0                                        | 0                      | 0                     | 0                        | 6.09                   | 1                     | 1                        |
| 6322312   | DAS1     | 1.06                   | 1                     | 1                        | 0                                      | 0                                     | 0                                        | 0                      | 0                     | 0                        | 2.71                   | 1                     | 1                        |
| 398364625 | YKL033W- | 3.81                   | 1                     | 2                        | 0                                      | 0                                     | 0                                        | 0                      | 0                     | 0                        | 6.36                   | 1                     | 1                        |
| 6320034   | NRP1     | 3.06                   | 2                     | 2                        | 0                                      | 0                                     | 0                                        | 0                      | 0                     | 0                        | 2.50                   | 1                     | 1                        |
| 6325374   | YPR117W  | 0.40                   | 1                     | 2                        | 0                                      | 0                                     | 0                                        | 0                      | 0                     | 0                        | 0.68                   | 1                     | 1                        |
| 6324546   | MDM38    | 7.16                   | 2                     | 2                        | 0                                      | 0                                     | 0                                        | 0                      | 0                     | 0                        | 3.66                   | 1                     | 1                        |
| 6323289   | LCB5     | 2.33                   | 1                     | 3                        | 0                                      | 0                                     | 0                                        | 0                      | 0                     | 0                        | 2.33                   | 1                     | 1                        |
| 6321205   | TAN1     | 13.84                  | 4                     | 4                        | 0                                      | 0                                     | 0                                        | 0                      | 0                     | 0                        | 3.11                   | 1                     | 1                        |
| 6319351   | PHO11    | 1.71                   | 1                     | 4                        | 0                                      | 0                                     | 0                                        | 0                      | 0                     | 0                        | 4.71                   | 1                     | 1                        |
| 6319523   | REB1     | 6.67                   | 4                     | 5                        | 0                                      | 0                                     | 0                                        | 0                      | 0                     | 0                        | 3.70                   | 1                     | 1                        |
| 6320921   | YER077C  | 0                      | 0                     | 0                        | 0                                      | 0                                     | 0                                        | 0                      | 0                     | 0                        | 3.05                   | 1                     | 1                        |
| 6320826   | GLC3     | 0                      | 0                     | 0                        | 0                                      | 0                                     | 0                                        | 0                      | 0                     | 0                        | 2.41                   | 1                     | 1                        |
| 398365141 | INP53    | 0                      | 0                     | 0                        | 0                                      | 0                                     | 0                                        | 0                      | 0                     | 0                        | 1.99                   | 1                     | 1                        |
| 398366583 | SIP1     | 0                      | 0                     | 0                        | 0                                      | 0                                     | 0                                        | 0                      | 0                     | 0                        | 2.70                   | 1                     | 1                        |
| 398364669 | MAD3     | 0                      | 0                     | 0                        | 0                                      | 0                                     | 0                                        | 0                      | 0                     | 0                        | 3.88                   | 1                     | 1                        |
| 6322700   | DBR1     | 0                      | 0                     | 0                        | 0                                      | 0                                     | 0                                        | 0                      | 0                     | 0                        | 3.95                   | 1                     | 1                        |
| 6323317   | YLR287C  | 0                      | 0                     | 0                        | 0                                      | 0                                     | 0                                        | 0                      | 0                     | 0                        | 6.20                   | 1                     | 1                        |
| 398365819 | SAN1     | 0                      | 0                     | 0                        | 0                                      | 0                                     | 0                                        | 0                      | 0                     | 0                        | 3.44                   | 1                     | 1                        |

Table S1 - Smith-Kinnaman, *et al* (2014) Abbreviations: %SC = percent sequence coverage, UP = unique peptides, PSM = peptide spectrum matches

| Accession | Acronym | %SC<br>FLAG_Rtr<br>1_1 | UP<br>FLAG_Rtr1<br>_1 | # PSM<br>FLAG_Rtr<br>1_1 | %SC<br>FLAG_Rtr1_<br>ctk1_deleti<br>on | UP<br>FLAG_Rtr<br>1_ctk1_d<br>eletion | # PSM<br>FLAG_Rtr<br>1_ctk1_d<br>eletion | %SC<br>FLAG_Rtr1<br>_2 | UP<br>FLAG_Rtr<br>1_2 | # PSM<br>FLAG_Rtr<br>1_2 | %SC<br>Rpb3_TA<br>P_WT | UP<br>Rpb3_TA<br>P_WT | # PSM<br>Rpb3_TA<br>P_WT |
|-----------|---------|------------------------|-----------------------|--------------------------|----------------------------------------|---------------------------------------|------------------------------------------|------------------------|-----------------------|--------------------------|------------------------|-----------------------|--------------------------|
| 6319273   | PTA1    | 0                      | 0                     | 0                        | 0                                      | 0                                     | 0                                        | 0                      | 0                     | 0                        | 1.78                   | 1                     | 1                        |
| 6323592   | RSE1    | 0                      | 0                     | 0                        | 0                                      | 0                                     | 0                                        | 0                      | 0                     | 0                        | 0.88                   | 1                     | 1                        |
| 398364677 | GLE2    | 0                      | 0                     | 0                        | 0                                      | 0                                     | 0                                        | 0                      | 0                     | 0                        | 3.56                   | 1                     | 1                        |
| 6324505   | RTG1    | 0                      | 0                     | 0                        | 0                                      | 0                                     | 0                                        | 0                      | 0                     | 0                        | 10.73                  | 1                     | 1                        |
| 6325281   | YME1    | 0                      | 0                     | 0                        | 0                                      | 0                                     | 0                                        | 0                      | 0                     | 0                        | 5.09                   | 1                     | 1                        |
| 6320159   | FAD1    | 0                      | 0                     | 0                        | 0                                      | 0                                     | 0                                        | 0                      | 0                     | 0                        | 5.88                   | 1                     | 1                        |
| 6319711   | ARC40   | 0                      | 0                     | 0                        | 0                                      | 0                                     | 0                                        | 0                      | 0                     | 0                        | 3.65                   | 1                     | 1                        |
| 6323933   | FCP1    | 0                      | 0                     | 0                        | 0                                      | 0                                     | 0                                        | 0                      | 0                     | 0                        | 3.96                   | 1                     | 1                        |
| 6323641   | YML002W | 0                      | 0                     | 0                        | 0                                      | 0                                     | 0                                        | 0                      | 0                     | 0                        | 1.90                   | 1                     | 1                        |
| 6323762   | MGR3    | 0                      | 0                     | 0                        | 0                                      | 0                                     | 0                                        | 0                      | 0                     | 0                        | 3.39                   | 1                     | 1                        |
| 6324948   | NDD1    | 0                      | 0                     | 0                        | 0                                      | 0                                     | 0                                        | 0                      | 0                     | 0                        | 3.61                   | 1                     | 1                        |
| 398365185 | AZF1    | 0                      | 0                     | 0                        | 0                                      | 0                                     | 0                                        | 0                      | 0                     | 0                        | 3.94                   | 1                     | 1                        |
| 6325040   | YPL216W | 0                      | 0                     | 0                        | 0                                      | 0                                     | 0                                        | 0                      | 0                     | 0                        | 1.27                   | 1                     | 1                        |
| 6322932   | TRZ1    | 0                      | 0                     | 0                        | 0                                      | 0                                     | 0                                        | 0                      | 0                     | 0                        | 3.82                   | 1                     | 1                        |
| 6322965   | AYT1    | 0                      | 0                     | 0                        | 0                                      | 0                                     | 0                                        | 0                      | 0                     | 0                        | 4.85                   | 1                     | 1                        |
| 398366037 | NUP42   | 0                      | 0                     | 0                        | 0                                      | 0                                     | 0                                        | 0                      | 0                     | 0                        | 6.51                   | 1                     | 1                        |
| 398364347 | GPA2    | 0                      | 0                     | 0                        | 0                                      | 0                                     | 0                                        | 0                      | 0                     | 0                        | 3.34                   | 1                     | 1                        |
| 6322492   | CPR7    | 0                      | 0                     | 0                        | 0                                      | 0                                     | 0                                        | 0                      | 0                     | 0                        | 4.07                   | 1                     | 1                        |
| 37362610  | FUN19   | 0                      | 0                     | 0                        | 0                                      | 0                                     | 0                                        | 0                      | 0                     | 0                        | 6.30                   | 1                     | 1                        |
| 398364541 | INP51   | 0                      | 0                     | 0                        | 0                                      | 0                                     | 0                                        | 0                      | 0                     | 0                        | 2.96                   | 1                     | 1                        |
| 6323580   | OGG1    | 0                      | 0                     | 0                        | 0                                      | 0                                     | 0                                        | 0                      | 0                     | 0                        | 4.26                   | 1                     | 1                        |
| 398366675 | AGE1    | 0                      | 0                     | 0                        | 0                                      | 0                                     | 0                                        | 0                      | 0                     | 0                        | 3.32                   | 1                     | 1                        |
| 6320060   | BPL1    | 0                      | 0                     | 0                        | 0                                      | 0                                     | 0                                        | 0                      | 0                     | 0                        | 2.61                   | 1                     | 1                        |
| 330443457 | BMT2    | 0                      | 0                     | 0                        | 0                                      | 0                                     | 0                                        | 0                      | 0                     | 0                        | 6.23                   | 1                     | 1                        |
| 6323385   | BUD8    | 0                      | 0                     | 0                        | 0                                      | 0                                     | 0                                        | 0                      | 0                     | 0                        | 4.64                   | 1                     | 1                        |
| 398364867 | CTR2    | 0                      | 0                     | 0                        | 0                                      | 0                                     | 0                                        | 0                      | 0                     | 0                        | 6.88                   | 1                     | 1                        |
| 398364539 | RTT101  | 0                      | 0                     | 0                        | 0                                      | 0                                     | 0                                        | 0                      | 0                     | 0                        | 1.66                   | 1                     | 1                        |
| 398364351 | CUP2    | 0                      | 0                     | 0                        | 0                                      | 0                                     | 0                                        | 0                      | 0                     | 0                        | 10.22                  | 1                     | 1                        |
| 6323896   | CUS1    | 0                      | 0                     | 0                        | 0                                      | 0                                     | 0                                        | 0                      | 0                     | 0                        | 2.52                   | 1                     | 1                        |
| 6323760   | FOL3    | 0                      | 0                     | 0                        | 0                                      | 0                                     | 0                                        | 0                      | 0                     | 0                        | 4.45                   | 1                     | 1                        |
| 398365821 | EFM2    | 0                      | 0                     | 0                        | 0                                      | 0                                     | 0                                        | 0                      | 0                     | 0                        | 6.44                   | 1                     | 1                        |
| 6322629   | FRE2    | 0                      | 0                     | 0                        | 0                                      | 0                                     | 0                                        | 0                      | 0                     | 0                        | 4.36                   | 1                     | 1                        |
| 6322324   | GLG2    | 0                      | 0                     | 0                        | 0                                      | 0                                     | 0                                        | 0                      | 0                     | 0                        | 2.37                   | 1                     | 1                        |
| 6321676   | YGR237C | 0                      | 0                     | 0                        | 0                                      | 0                                     | 0                                        | 0                      | 0                     | 0                        | 1.27                   | 1                     | 1                        |
| 6322432   | YJL028W | 0                      | 0                     | 0                        | 0                                      | 0                                     | 0                                        | 0                      | 0                     | 0                        | 8.11                   | 1                     | 1                        |
| 6322498   | YJR039W | 0                      | 0                     | 0                        | 0                                      | 0                                     | 0                                        | 0                      | 0                     | 0                        | 1.43                   | 1                     | 1                        |
| 6323075   | YLR046C | 0                      | 0                     | 0                        | 0                                      | 0                                     | 0                                        | 0                      | 0                     | 0                        | 4.44                   | 1                     | 1                        |



Table S1 - Smith-Kinnaman, *et al* (2014) Abbreviations: %SC = percent sequence coverage, UP = unique peptides, PSM = peptide spectrum matches

| Accession | Acronym  | %SC<br>FLAG_Rtr<br>1_1 | UP<br>FLAG_Rtr1<br>_1 | # PSM<br>FLAG_Rtr<br>1_1 | %SC<br>FLAG_Rtr1_<br>ctk1_deleti<br>on | UP<br>FLAG_Rtr<br>1_ctk1_d<br>eletion | # PSM<br>FLAG_Rtr<br>1_ctk1_d<br>eletion | %SC<br>FLAG_Rtr1<br>_2 | UP<br>FLAG_Rtr<br>1_2 | # PSM<br>FLAG_Rtr<br>1_2 | %SC<br>Rpb3_TA<br>P_WT | UP<br>Rpb3_TA<br>P_WT | # PSM<br>Rpb3_TA<br>P_WT |
|-----------|----------|------------------------|-----------------------|--------------------------|----------------------------------------|---------------------------------------|------------------------------------------|------------------------|-----------------------|--------------------------|------------------------|-----------------------|--------------------------|
| 398365335 | YNL033W  | 0                      | 0                     | 0                        | 0                                      | 0                                     | 0                                        | 0                      | 0                     | 0                        | 4.93                   | 1                     | 1                        |
| 33438893  | YPL119C- | 0                      | 0                     | 0                        | 0                                      | 0                                     | 0                                        | 0                      | 0                     | 0                        | 25.29                  | 1                     | 1                        |
| 6322579   | JHD2     | 0                      | 0                     | 0                        | 0                                      | 0                                     | 0                                        | 0                      | 0                     | 0                        | 3.43                   | 1                     | 1                        |
| 6324141   | KAR1     | 0                      | 0                     | 0                        | 0                                      | 0                                     | 0                                        | 0                      | 0                     | 0                        | 2.31                   | 1                     | 1                        |
| 10383756  | LRE1     | 0                      | 0                     | 0                        | 0                                      | 0                                     | 0                                        | 0                      | 0                     | 0                        | 3.77                   | 1                     | 1                        |
| 398364917 | NHP10    | 0                      | 0                     | 0                        | 0                                      | 0                                     | 0                                        | 0                      | 0                     | 0                        | 4.93                   | 1                     | 1                        |
| 6323035   | NSE1     | 0                      | 0                     | 0                        | 0                                      | 0                                     | 0                                        | 0                      | 0                     | 0                        | 6.85                   | 1                     | 1                        |
| 50593425  | OMA1     | 0                      | 0                     | 0                        | 0                                      | 0                                     | 0                                        | 0                      | 0                     | 0                        | 3.77                   | 1                     | 1                        |
| 6321910   | ORC6     | 0                      | 0                     | 0                        | 0                                      | 0                                     | 0                                        | 0                      | 0                     | 0                        | 5.75                   | 1                     | 1                        |
| 6322494   | PET191   | 0                      | 0                     | 0                        | 0                                      | 0                                     | 0                                        | 0                      | 0                     | 0                        | 23.15                  | 1                     | 1                        |
| 398365057 | SPO14    | 0                      | 0                     | 0                        | 0                                      | 0                                     | 0                                        | 0                      | 0                     | 0                        | 0.83                   | 1                     | 1                        |
| 398364971 | TRP1     | 0                      | 0                     | 0                        | 0                                      | 0                                     | 0                                        | 0                      | 0                     | 0                        | 11.16                  | 1                     | 1                        |
| 398365003 | PSF1     | 0                      | 0                     | 0                        | 0                                      | 0                                     | 0                                        | 0                      | 0                     | 0                        | 7.69                   | 1                     | 1                        |
| 6321697   | RAD2     | 0                      | 0                     | 0                        | 0                                      | 0                                     | 0                                        | 0                      | 0                     | 0                        | 0.78                   | 1                     | 1                        |
| 6319525   | REG2     | 0                      | 0                     | 0                        | 0                                      | 0                                     | 0                                        | 0                      | 0                     | 0                        | 3.85                   | 1                     | 1                        |
| 6320271   | RTR2     | 0                      | 0                     | 0                        | 0                                      | 0                                     | 0                                        | 0                      | 0                     | 0                        | 5.61                   | 1                     | 1                        |
| 6324162   | SKO1     | 0                      | 0                     | 0                        | 0                                      | 0                                     | 0                                        | 0                      | 0                     | 0                        | 3.40                   | 1                     | 1                        |
| 398366633 | SNM1     | 0                      | 0                     | 0                        | 0                                      | 0                                     | 0                                        | 0                      | 0                     | 0                        | 5.05                   | 1                     | 1                        |
| 6322778   | STB6     | 0                      | 0                     | 0                        | 0                                      | 0                                     | 0                                        | 0                      | 0                     | 0                        | 2.61                   | 1                     | 1                        |
| 6325081   | TRE1     | 0                      | 0                     | 0                        | 0                                      | 0                                     | 0                                        | 0                      | 0                     | 0                        | 2.68                   | 1                     | 1                        |
| 6324447   | TRM13    | 0                      | 0                     | 0                        | 0                                      | 0                                     | 0                                        | 0                      | 0                     | 0                        | 2.52                   | 1                     | 1                        |
| 6323236   | HRD3     | 0                      | 0                     | 0                        | 0                                      | 0                                     | 0                                        | 0                      | 0                     | 0                        | 1.80                   | 1                     | 1                        |
| 6325184   | UBP16    | 0                      | 0                     | 0                        | 0                                      | 0                                     | 0                                        | 0                      | 0                     | 0                        | 3.61                   | 1                     | 1                        |
| 398364885 | UBP5     | 0                      | 0                     | 0                        | 0                                      | 0                                     | 0                                        | 0                      | 0                     | 0                        | 1.86                   | 1                     | 1                        |
| 6325071   | UIP4     | 0                      | 0                     | 0                        | 0                                      | 0                                     | 0                                        | 0                      | 0                     | 0                        | 10.20                  | 1                     | 1                        |
| 398365127 | UIP5     | 0                      | 0                     | 0                        | 0                                      | 0                                     | 0                                        | 0                      | 0                     | 0                        | 4.74                   | 1                     | 1                        |
| 6319904   | YIH1     | 0                      | 0                     | 0                        | 0                                      | 0                                     | 0                                        | 0                      | 0                     | 0                        | 11.24                  | 1                     | 1                        |
| 6325266   | SUT2     | 0                      | 0                     | 0                        | 0                                      | 0                                     | 0                                        | 0                      | 0                     | 0                        | 7.46                   | 1                     | 1                        |
| 6324449   | HRP1     | 0                      | 0                     | 0                        | 0                                      | 0                                     | 0                                        | 0                      | 0                     | 0                        | 4.31                   | 1                     | 1                        |
| 6323278   | YEF3     | 19.44                  | 17                    | 205                      | 10.63                                  | 9                                     | 72                                       | 12.36                  | 12                    | 100                      | 0                      | 0                     | 0                        |
| 6322084   | PFK26    | 37.00                  | 27                    | 1046                     | 48.85                                  | 32                                    | 1153                                     | 45.59                  | 28                    | 1064                     | 0                      | 0                     | 0                        |
| 6323057   | RPL15A   | 25.49                  | 5                     | 82                       | 24.02                                  | 4                                     | 76                                       | 11.27                  | 2                     | 4                        | 0                      | 0                     | 0                        |
| 6323769   | RPL15B   | 25.49                  | 5                     | 75                       | 20.59                                  | 3                                     | 58                                       | 7.84                   | 1                     | 3                        | 0                      | 0                     | 0                        |
| 6319282   | FUN12    | 15.77                  | 13                    | 32                       | 0                                      | 0                                     | 0                                        | 0                      | 0                     | 0                        | 0                      | 0                     | 0                        |
| 6320190   | NOP1     | 19.27                  | 5                     | 17                       | 0                                      | 0                                     | 0                                        | 0                      | 0                     | 0                        | 0                      | 0                     | 0                        |
| 6323654   | CLU1     | 22.08                  | 21                    | 499                      | 0                                      | 0                                     | 0                                        | 6.11                   | 5                     | 10                       | 0                      | 0                     | 0                        |
| 6324886   | NOP58    | 17.42                  | 7                     | 21                       | 0                                      | 0                                     | 0                                        | 15.85                  | 5                     | 11                       | 0                      | 0                     | 0                        |

Table S1 - Smith-Kinnaman, *et al* (2014) Abbreviations: %SC = percent sequence coverage, UP = unique peptides, PSM = peptide spectrum matches

| Accession | Acronym | %SC<br>FLAG_Rtr<br>1_1 | UP<br>FLAG_Rtr1<br>_1 | # PSM<br>FLAG_Rtr<br>1_1 | %SC<br>FLAG_Rtr1_<br>ctk1_deleti<br>on | UP<br>FLAG_Rtr<br>1_ctk1_d<br>eletion | # PSM<br>FLAG_Rtr<br>1_ctk1_d<br>eletion | %SC<br>FLAG_Rtr1<br>_2 | UP<br>FLAG_Rtr<br>1_2 | # PSM<br>FLAG_Rtr<br>1_2 | %SC<br>Rpb3_TA<br>P_WT | UP<br>Rpb3_TA<br>P_WT | # PSM<br>Rpb3_TA<br>P_WT |
|-----------|---------|------------------------|-----------------------|--------------------------|----------------------------------------|---------------------------------------|------------------------------------------|------------------------|-----------------------|--------------------------|------------------------|-----------------------|--------------------------|
| 6323226   | NOP56   | 18.65                  | 7                     | 25                       | 0                                      | 0                                     | 0                                        | 10.52                  | 3                     | 10                       | 0                      | 0                     | 0                        |
| 37362658  | SSZ1    | 26.39                  | 11                    | 119                      | 17.29                                  | 6                                     | 51                                       | 13.75                  | 5                     | 14                       | 0                      | 0                     | 0                        |
| 6324452   | RPL18A  | 23.66                  | 4                     | 161                      | 22.04                                  | 4                                     | 311                                      | 12.37                  | 2                     | 89                       | 0                      | 0                     | 0                        |
| 398366653 | LCD1    | 31.99                  | 21                    | 565                      | 6.43                                   | 5                                     | 27                                       | 16.47                  | 9                     | 86                       | 0                      | 0                     | 0                        |
| 6322313   | RPA34   | 44.64                  | 7                     | 48                       | 32.62                                  | 6                                     | 71                                       | 26.61                  | 4                     | 150                      | 0                      | 0                     | 0                        |
| 398364437 | RPL1B   | 6.45                   | 2                     | 9                        | 28.11                                  | 5                                     | 343                                      | 24.42                  | 5                     | 136                      | 0                      | 0                     | 0                        |
| 6321968   | ENO2    | 37.76                  | 15                    | 1712                     | 50.57                                  | 14                                    | 415                                      | 46.00                  | 16                    | 633                      | 0                      | 0                     | 0                        |
| 398365729 | DED1    | 24.83                  | 12                    | 51                       | 15.40                                  | 6                                     | 40                                       | 5.13                   | 2                     | 2                        | 0                      | 0                     | 0                        |
| 6323566   | FPR3    | 2.68                   | 1                     | 73                       | 2.68                                   | 1                                     | 1                                        | 4.14                   | 1                     | 2                        | 0                      | 0                     | 0                        |
| 398366315 | ENO1    | 38.44                  | 14                    | 1548                     | 47.14                                  | 13                                    | 427                                      | 35.70                  | 12                    | 518                      | 0                      | 0                     | 0                        |
| 10383781  | PGK1    | 40.14                  | 16                    | 691                      | 39.90                                  | 13                                    | 164                                      | 37.50                  | 14                    | 273                      | 0                      | 0                     | 0                        |
| 6321874   | KSP1    | 11.08                  | 9                     | 148                      | 0                                      | 0                                     | 0                                        | 2.62                   | 2                     | 3                        | 0                      | 0                     | 0                        |
| 6321531   | VAS1    | 23.82                  | 23                    | 229                      | 5.71                                   | 5                                     | 7                                        | 5.25                   | 4                     | 5                        | 0                      | 0                     | 0                        |
| 6322769   | TEF4    | 14.08                  | 5                     | 173                      | 9.71                                   | 3                                     | 24                                       | 22.57                  | 7                     | 65                       | 0                      | 0                     | 0                        |
| 398366187 | HTA1    | 6.82                   | 1                     | 15                       | 6.82                                   | 1                                     | 4                                        | 0                      | 0                     | 0                        | 0                      | 0                     | 0                        |
| 330443451 | GRS1    | 25.49                  | 17                    | 98                       | 2.40                                   | 1                                     | 1                                        | 6.60                   | 3                     | 10                       | 0                      | 0                     | 0                        |
| 6321203   | ADE5,7  | 15.71                  | 9                     | 23                       | 4.99                                   | 3                                     | 5                                        | 9.10                   | 5                     | 14                       | 0                      | 0                     | 0                        |
| 6324486   | ADH1    | 31.90                  | 11                    | 1603                     | 43.10                                  | 10                                    | 217                                      | 46.55                  | 13                    | 501                      | 0                      | 0                     | 0                        |
| 6323371   | RPP0    | 15.38                  | 4                     | 115                      | 24.04                                  | 7                                     | 186                                      | 28.85                  | 7                     | 157                      | 0                      | 0                     | 0                        |
| 6323886   | RPS10B  | 7.62                   | 1                     | 2                        | 0                                      | 0                                     | 0                                        | 0                      | 0                     | 0                        | 0                      | 0                     | 0                        |
| 6320009   | ARF1    | 18.78                  | 3                     | 11                       | 13.81                                  | 2                                     | 25                                       | 29.28                  | 4                     | 54                       | 0                      | 0                     | 0                        |
| 6321429   | LEU1    | 26.57                  | 18                    | 905                      | 10.01                                  | 7                                     | 88                                       | 7.32                   | 4                     | 22                       | 0                      | 0                     | 0                        |
| 6323204   | CBF5    | 3.93                   | 1                     | 4                        | 0                                      | 0                                     | 0                                        | 0                      | 0                     | 0                        | 0                      | 0                     | 0                        |
| 6320064   | ARF2    | 18.78                  | 3                     | 11                       | 13.81                                  | 2                                     | 10                                       | 23.76                  | 3                     | 24                       | 0                      | 0                     | 0                        |
| 6321265   | XRN1    | 10.67                  | 12                    | 49                       | 0                                      | 0                                     | 0                                        | 3.01                   | 3                     | 4                        | 0                      | 0                     | 0                        |
| 6323904   | RKR1    | 17.99                  | 26                    | 637                      | 5.06                                   | 6                                     | 12                                       | 3.20                   | 5                     | 18                       | 0                      | 0                     | 0                        |
| 6322790   | FBA1    | 12.81                  | 3                     | 602                      | 18.11                                  | 5                                     | 59                                       | 24.51                  | 5                     | 160                      | 0                      | 0                     | 0                        |
| 6324562   | HTZ1    | 7.46                   | 1                     | 1                        | 0                                      | 0                                     | 0                                        | 7.46                   | 1                     | 3                        | 0                      | 0                     | 0                        |
| 6321231   | SPT16   | 5.60                   | 5                     | 10                       | 0                                      | 0                                     | 0                                        | 0                      | 0                     | 0                        | 0                      | 0                     | 0                        |
| 398365455 | TEF3    | 3.07                   | 3                     | 71                       | 2.59                                   | 2                                     | 2                                        | 2.01                   | 2                     | 19                       | 0                      | 0                     | 0                        |
| 398366333 | FPR4    | 0                      | 0                     | 0                        | 0                                      | 0                                     | 0                                        | 4.34                   | 1                     | 2                        | 0                      | 0                     | 0                        |
| 398364607 | DBP3    | 20.46                  | 9                     | 74                       | 0                                      | 0                                     | 0                                        | 0                      | 0                     | 0                        | 0                      | 0                     | 0                        |
| 6324534   | RPP2A   | 61.32                  | 4                     | 75                       | 37.74                                  | 2                                     | 6                                        | 50.94                  | 3                     | 10                       | 0                      | 0                     | 0                        |
| 6321430   | PMA1    | 16.12                  | 14                    | 78                       | 19.93                                  | 13                                    | 99                                       | 14.16                  | 11                    | 138                      | 0                      | 0                     | 0                        |
| 398364809 | DBP2    | 15.57                  | 8                     | 18                       | 9.16                                   | 4                                     | 8                                        | 0                      | 0                     | 0                        | 0                      | 0                     | 0                        |
| 6319668   | RPL21A  | 21.88                  | 4                     | 21                       | 21.88                                  | 4                                     | 106                                      | 16.25                  | 3                     | 16                       | 0                      | 0                     | 0                        |
| 6323981   | FET4    | 11.23                  | 5                     | 18                       | 1.99                                   | 1                                     | 24                                       | 8.51                   | 4                     | 52                       | 0                      | 0                     | 0                        |

Table S1 - Smith-Kinnaman, *et al* (2014) Abbreviations: %SC = percent sequence coverage, UP = unique peptides, PSM = peptide spectrum matches

| Accession | Acronym | %SC<br>FLAG_Rtr<br>1_1 | UP<br>FLAG_Rtr1<br>_1 | # PSM<br>FLAG_Rtr<br>1_1 | %SC<br>FLAG_Rtr1_<br>ctk1_deleti<br>on | UP<br>FLAG_Rtr<br>1_ctk1_d<br>eletion | # PSM<br>FLAG_Rtr<br>1_ctk1_d<br>eletion | %SC<br>FLAG_Rtr1<br>_2 | UP<br>FLAG_Rtr<br>1_2 | # PSM<br>FLAG_Rtr<br>1_2 | %SC<br>Rpb3_TA<br>P_WT | UP<br>Rpb3_TA<br>P_WT | # PSM<br>Rpb3_TA<br>P_WT |
|-----------|---------|------------------------|-----------------------|--------------------------|----------------------------------------|---------------------------------------|------------------------------------------|------------------------|-----------------------|--------------------------|------------------------|-----------------------|--------------------------|
| 6321807   | DED81   | 13.18                  | 6                     | 32                       | 5.96                                   | 2                                     | 5                                        | 10.11                  | 4                     | 20                       | 0                      | 0                     | 0                        |
| 398364767 | SUI2    | 25.33                  | 6                     | 20                       | 3.62                                   | 1                                     | 1                                        | 9.21                   | 2                     | 5                        | 0                      | 0                     | 0                        |
| 6323011   | DPS1    | 20.65                  | 10                    | 56                       | 1.62                                   | 1                                     | 2                                        | 3.23                   | 1                     | 3                        | 0                      | 0                     | 0                        |
| 6323885   | RRP5    | 4.80                   | 8                     | 10                       | 0                                      | 0                                     | 0                                        | 0                      | 0                     | 0                        | 0                      | 0                     | 0                        |
| 398366547 | RPP2B   | 50.00                  | 4                     | 138                      | 40.00                                  | 2                                     | 2                                        | 61.82                  | 5                     | 33                       | 0                      | 0                     | 0                        |
| 6323288   | HSP60   | 35.49                  | 16                    | 256                      | 33.39                                  | 14                                    | 215                                      | 31.82                  | 13                    | 167                      | 0                      | 0                     | 0                        |
| 6321599   | NSR1    | 11.11                  | 3                     | 16                       | 0                                      | 0                                     | 0                                        | 0                      | 0                     | 0                        | 0                      | 0                     | 0                        |
| 6320863   | GCD11   | 22.39                  | 10                    | 73                       | 3.23                                   | 1                                     | 3                                        | 9.11                   | 3                     | 9                        | 0                      | 0                     | 0                        |
| 398366591 | NPL3    | 14.73                  | 4                     | 20                       | 15.70                                  | 4                                     | 215                                      | 10.87                  | 3                     | 13                       | 0                      | 0                     | 0                        |
| 6319483   | IPP1    | 19.86                  | 5                     | 89                       | 17.07                                  | 3                                     | 30                                       | 30.66                  | 5                     | 28                       | 0                      | 0                     | 0                        |
| 6325221   | PMA2    | 12.35                  | 11                    | 75                       | 14.99                                  | 11                                    | 86                                       | 10.77                  | 9                     | 133                      | 0                      | 0                     | 0                        |
| 6322745   | GFA1    | 16.32                  | 7                     | 75                       | 9.90                                   | 5                                     | 26                                       | 18.41                  | 8                     | 30                       | 0                      | 0                     | 0                        |
| 398364525 | LSG1    | 14.22                  | 8                     | 10                       | 1.72                                   | 1                                     | 2                                        | 0                      | 0                     | 0                        | 0                      | 0                     | 0                        |
| 6325038   | SAR1    | 25.79                  | 4                     | 33                       | 20.53                                  | 3                                     | 53                                       | 6.84                   | 1                     | 1                        | 0                      | 0                     | 0                        |
| 6323840   | HSC82   | 34.04                  | 23                    | 914                      | 17.02                                  | 10                                    | 109                                      | 21.13                  | 12                    | 62                       | 0                      | 0                     | 0                        |
| 6321881   | GAR1    | 0                      | 0                     | 0                        | 0                                      | 0                                     | 0                                        | 6.34                   | 1                     | 1                        | 0                      | 0                     | 0                        |
| 6320164   | NAT1    | 5.62                   | 4                     | 7                        | 0                                      | 0                                     | 0                                        | 0                      | 0                     | 0                        | 0                      | 0                     | 0                        |
| 398366403 | RPS12   | 22.38                  | 3                     | 21                       | 7.69                                   | 2                                     | 4                                        | 26.57                  | 4                     | 65                       | 0                      | 0                     | 0                        |
| 6322830   | CDC16   | 21.19                  | 17                    | 255                      | 15.48                                  | 11                                    | 86                                       | 17.74                  | 11                    | 83                       | 0                      | 0                     | 0                        |
| 330443397 | ATP1    | 10.46                  | 5                     | 43                       | 19.45                                  | 9                                     | 89                                       | 21.10                  | 8                     | 47                       | 0                      | 0                     | 0                        |
| 6324709   | IDH2    | 23.85                  | 7                     | 188                      | 15.99                                  | 4                                     | 19                                       | 15.99                  | 4                     | 19                       | 0                      | 0                     | 0                        |
| 6325178   | RPL21B  | 21.88                  | 4                     | 21                       | 21.88                                  | 4                                     | 106                                      | 16.25                  | 3                     | 16                       | 0                      | 0                     | 0                        |
| 6321903   | UBA4    | 28.86                  | 13                    | 382                      | 23.18                                  | 11                                    | 343                                      | 15.00                  | 6                     | 159                      | 0                      | 0                     | 0                        |
| 6325138   | DBP1    | 6.32                   | 4                     | 36                       | 1.78                                   | 1                                     | 2                                        | 0                      | 0                     | 0                        | 0                      | 0                     | 0                        |
| 6325248   | TAE2    | 1.16                   | 1                     | 1                        | 0                                      | 0                                     | 0                                        | 0                      | 0                     | 0                        | 0                      | 0                     | 0                        |
| 330443505 | DBP10   | 4.52                   | 4                     | 6                        | 0                                      | 0                                     | 0                                        | 0                      | 0                     | 0                        | 0                      | 0                     | 0                        |
| 6320148   | PSA1    | 10.25                  | 3                     | 4                        | 21.61                                  | 5                                     | 36                                       | 16.07                  | 5                     | 57                       | 0                      | 0                     | 0                        |
| 6325016   | HSP82   | 31.17                  | 21                    | 887                      | 19.32                                  | 11                                    | 110                                      | 21.44                  | 12                    | 63                       | 0                      | 0                     | 0                        |
| 6320874   | ARB1    | 20.82                  | 9                     | 113                      | 8.52                                   | 4                                     | 9                                        | 9.67                   | 4                     | 8                        | 0                      | 0                     | 0                        |
| 6319673   | PGI1    | 12.09                  | 6                     | 72                       | 0                                      | 0                                     | 0                                        | 2.53                   | 1                     | 1                        | 0                      | 0                     | 0                        |
| 398365251 | GSC2    | 3.43                   | 6                     | 9                        | 6.60                                   | 9                                     | 130                                      | 16.89                  | 21                    | 465                      | 0                      | 0                     | 0                        |
| 6325018   | SUI3    | 35.44                  | 8                     | 73                       | 0                                      | 0                                     | 0                                        | 4.56                   | 1                     | 1                        | 0                      | 0                     | 0                        |
| 6323374   | FKS1    | 9.49                   | 14                    | 41                       | 8.80                                   | 12                                    | 156                                      | 19.03                  | 26                    | 633                      | 0                      | 0                     | 0                        |
| 14318479  | ACT1    | 20.53                  | 7                     | 65                       | 14.93                                  | 5                                     | 49                                       | 23.20                  | 6                     | 55                       | 0                      | 0                     | 0                        |
| 6323554   | TUB1    | 10.96                  | 5                     | 90                       | 5.37                                   | 2                                     | 2                                        | 8.05                   | 3                     | 3                        | 0                      | 0                     | 0                        |
| 6321724   | ZUO1    | 20.09                  | 7                     | 55                       | 21.94                                  | 5                                     | 21                                       | 3.70                   | 1                     | 4                        | 0                      | 0                     | 0                        |
| 6320842   | NUG1    | 10.58                  | 4                     | 4                        | 2.50                                   | 1                                     | 3                                        | 0                      | 0                     | 0                        | 0                      | 0                     | 0                        |



Table S1 - Smith-Kinnaman, *et al* (2014) Abbreviations: %SC = percent sequence coverage, UP = unique peptides, PSM = peptide spectrum matches

| Accession | Acronym | %SC<br>FLAG_Rtr<br>1_1 | UP<br>FLAG_Rtr1<br>_1 | # PSM<br>FLAG_Rtr<br>1_1 | %SC<br>FLAG_Rtr1_<br>ctk1_deleti<br>on | UP<br>FLAG_Rtr<br>1_ctk1_d<br>eletion | # PSM<br>FLAG_Rtr<br>1_ctk1_d<br>eletion | %SC<br>FLAG_Rtr1<br>_2 | UP<br>FLAG_Rtr<br>1_2 | # PSM<br>FLAG_Rtr<br>1_2 | %SC<br>Rpb3_TA<br>P_WT | UP<br>Rpb3_TA<br>P_WT | # PSM<br>Rpb3_TA<br>P_WT |
|-----------|---------|------------------------|-----------------------|--------------------------|----------------------------------------|---------------------------------------|------------------------------------------|------------------------|-----------------------|--------------------------|------------------------|-----------------------|--------------------------|
| 6321027   | DMC1    | 0                      | 0                     | 0                        | 0                                      | 0                                     | 0                                        | 0                      | 0                     | 0                        | 0                      | 0                     | 0                        |
| 398364483 | HOR2    | 17.20                  | 4                     | 100                      | 6.00                                   | 1                                     | 22                                       | 6.00                   | 1                     | 8                        | 0                      | 0                     | 0                        |
| 398365429 | PDR5    | 10.13                  | 12                    | 19                       | 0                                      | 0                                     | 0                                        | 17.94                  | 19                    | 375                      | 0                      | 0                     | 0                        |
| 6325245   | RRP12   | 5.54                   | 6                     | 8                        | 0                                      | 0                                     | 0                                        | 0                      | 0                     | 0                        | 0                      | 0                     | 0                        |
| 398364937 | TOP2    | 0.77                   | 1                     | 1                        | 0                                      | 0                                     | 0                                        | 0                      | 0                     | 0                        | 0                      | 0                     | 0                        |
| 6324660   | TCB1    | 1.01                   | 1                     | 1                        | 1.26                                   | 1                                     | 1                                        | 1.60                   | 1                     | 2                        | 0                      | 0                     | 0                        |
| 6320056   | COP1    | 11.32                  | 11                    | 20                       | 0.67                                   | 1                                     | 1                                        | 6.74                   | 5                     | 12                       | 0                      | 0                     | 0                        |
| 398365597 | BMH2    | 24.54                  | 7                     | 105                      | 8.42                                   | 1                                     | 11                                       | 15.38                  | 3                     | 12                       | 0                      | 0                     | 0                        |
| 6325030   | NEW1    | 8.53                   | 9                     | 24                       | 2.84                                   | 3                                     | 3                                        | 0.84                   | 1                     | 2                        | 0                      | 0                     | 0                        |
| 6321809   | RPS27B  | 9.76                   | 1                     | 5                        | 0                                      | 0                                     | 0                                        | 0                      | 0                     | 0                        | 0                      | 0                     | 0                        |
| 6321012   | CHD1    | 5.72                   | 7                     | 8                        | 0                                      | 0                                     | 0                                        | 0                      | 0                     | 0                        | 0                      | 0                     | 0                        |
| 6320499   | SSD1    | 4.88                   | 5                     | 8                        | 0                                      | 0                                     | 0                                        | 0                      | 0                     | 0                        | 0                      | 0                     | 0                        |
| 6323072   | TRX1    | 45.63                  | 4                     | 105                      | 9.71                                   | 1                                     | 1                                        | 24.27                  | 2                     | 8                        | 0                      | 0                     | 0                        |
| 6325238   | VTC3    | 2.75                   | 2                     | 2                        | 1.56                                   | 1                                     | 1                                        | 10.18                  | 6                     | 32                       | 0                      | 0                     | 0                        |
| 398365319 | MAK21   | 10.15                  | 7                     | 16                       | 0                                      | 0                                     | 0                                        | 0                      | 0                     | 0                        | 0                      | 0                     | 0                        |
| 398364327 | LSB3    | 22.88                  | 8                     | 72                       | 0                                      | 0                                     | 0                                        | 7.84                   | 2                     | 2                        | 0                      | 0                     | 0                        |
| 6319513   | ATP3    | 18.97                  | 6                     | 44                       | 8.68                                   | 2                                     | 6                                        | 17.04                  | 4                     | 6                        | 0                      | 0                     | 0                        |
| 6324140   | SRP1    | 5.35                   | 3                     | 27                       | 2.40                                   | 1                                     | 1                                        | 2.40                   | 1                     | 14                       | 0                      | 0                     | 0                        |
| 6324297   | HHT2    | 0                      | 0                     | 0                        | 5.15                                   | 1                                     | 1                                        | 0                      | 0                     | 0                        | 0                      | 0                     | 0                        |
| 6323306   | DBP9    | 10.61                  | 6                     | 7                        | 0                                      | 0                                     | 0                                        | 0                      | 0                     | 0                        | 0                      | 0                     | 0                        |
| 6324039   | RFC3    | 17.35                  | 5                     | 7                        | 0                                      | 0                                     | 0                                        | 3.24                   | 1                     | 1                        | 0                      | 0                     | 0                        |
| 6321193   | RTF1    | 14.87                  | 8                     | 127                      | 1.97                                   | 1                                     | 1                                        | 2.33                   | 1                     | 4                        | 0                      | 0                     | 0                        |
| 398366149 | TRX2    | 58.65                  | 5                     | 183                      | 9.62                                   | 1                                     | 1                                        | 12.50                  | 1                     | 4                        | 0                      | 0                     | 0                        |
| 6322452   | CCT8    | 19.72                  | 10                    | 32                       | 13.03                                  | 6                                     | 15                                       | 6.34                   | 3                     | 46                       | 0                      | 0                     | 0                        |
| 6321679   | PFK1    | 24.11                  | 19                    | 339                      | 10.03                                  | 7                                     | 29                                       | 10.64                  | 8                     | 46                       | 0                      | 0                     | 0                        |
| 6324219   | NOP15   | 4.09                   | 1                     | 1                        | 0                                      | 0                                     | 0                                        | 0                      | 0                     | 0                        | 0                      | 0                     | 0                        |
| 330443717 | CTR9    | 16.06                  | 15                    | 62                       | 0                                      | 0                                     | 0                                        | 0                      | 0                     | 0                        | 0                      | 0                     | 0                        |
| 6323755   | ILV2    | 9.75                   | 5                     | 49                       | 6.26                                   | 3                                     | 10                                       | 10.77                  | 4                     | 7                        | 0                      | 0                     | 0                        |
| 6320276   | PAA1    | 9.95                   | 2                     | 3                        | 6.81                                   | 1                                     | 9                                        | 0                      | 0                     | 0                        | 0                      | 0                     | 0                        |
| 6681849   | RPL42A  | 0                      | 0                     | 0                        | 0                                      | 0                                     | 0                                        | 0                      | 0                     | 0                        | 0                      | 0                     | 0                        |
| 14318517  | SEC4    | 15.81                  | 3                     | 6                        | 5.12                                   | 1                                     | 2                                        | 8.37                   | 1                     | 10                       | 0                      | 0                     | 0                        |
| 6320400   | MSS116  | 3.92                   | 2                     | 3                        | 0                                      | 0                                     | 0                                        | 0                      | 0                     | 0                        | 0                      | 0                     | 0                        |
| 6321389   | TIF4632 | 4.92                   | 3                     | 6                        | 0                                      | 0                                     | 0                                        | 0                      | 0                     | 0                        | 0                      | 0                     | 0                        |
| 6324081   | RPA49   | 32.53                  | 11                    | 52                       | 0                                      | 0                                     | 0                                        | 0                      | 0                     | 0                        | 0                      | 0                     | 0                        |
| 398366347 | MES1    | 17.44                  | 12                    | 33                       | 0                                      | 0                                     | 0                                        | 3.46                   | 2                     | 7                        | 0                      | 0                     | 0                        |
| 6320418   | TCP1    | 19.50                  | 10                    | 146                      | 10.38                                  | 5                                     | 20                                       | 10.02                  | 4                     | 24                       | 0                      | 0                     | 0                        |
| 398365595 | PIL1    | 34.51                  | 8                     | 113                      | 27.73                                  | 6                                     | 33                                       | 34.51                  | 7                     | 42                       | 0                      | 0                     | 0                        |

Table S1 - Smith-Kinnaman, *et al* (2014) Abbreviations: %SC = percent sequence coverage, UP = unique peptides, PSM = peptide spectrum matches

| Accession | Acronym | %SC<br>FLAG_Rtr<br>1_1 | UP<br>FLAG_Rtr1<br>_1 | # PSM<br>FLAG_Rtr<br>1_1 | %SC<br>FLAG_Rtr1_<br>ctk1_deleti<br>on | UP<br>FLAG_Rtr<br>1_ctk1_d<br>eletion | # PSM<br>FLAG_Rtr<br>1_ctk1_d<br>eletion | %SC<br>FLAG_Rtr1<br>_2 | UP<br>FLAG_Rtr<br>1_2 | # PSM<br>FLAG_Rtr<br>1_2 | %SC<br>Rpb3_TA<br>P_WT | UP<br>Rpb3_TA<br>P_WT | # PSM<br>Rpb3_TA<br>P_WT |
|-----------|---------|------------------------|-----------------------|--------------------------|----------------------------------------|---------------------------------------|------------------------------------------|------------------------|-----------------------|--------------------------|------------------------|-----------------------|--------------------------|
| 398364417 | SAH1    | 13.14                  | 5                     | 94                       | 2.67                                   | 1                                     | 1                                        | 3.34                   | 1                     | 1                        | 0                      | 0                     | 0                        |
| 6320396   | RVB1    | 16.41                  | 6                     | 26                       | 2.59                                   | 1                                     | 1                                        | 5.40                   | 2                     | 2                        | 0                      | 0                     | 0                        |
| 6320077   | CDC48   | 13.05                  | 8                     | 44                       | 8.02                                   | 5                                     | 32                                       | 9.10                   | 5                     | 12                       | 0                      | 0                     | 0                        |
| 6325025   | FAS2    | 13.94                  | 21                    | 150                      | 14.84                                  | 20                                    | 126                                      | 18.02                  | 23                    | 146                      | 0                      | 0                     | 0                        |
| 6324517   | THI20   | 14.52                  | 6                     | 32                       | 30.67                                  | 15                                    | 548                                      | 31.22                  | 14                    | 411                      | 0                      | 0                     | 0                        |
| 6323030   | NOC3    | 1.96                   | 1                     | 1                        | 0                                      | 0                                     | 0                                        | 0                      | 0                     | 0                        | 0                      | 0                     | 0                        |
| 6320143   | TSR1    | 4.44                   | 3                     | 5                        | 0                                      | 0                                     | 0                                        | 0                      | 0                     | 0                        | 0                      | 0                     | 0                        |
| 6321318   | PRP43   | 7.17                   | 5                     | 10                       | 0                                      | 0                                     | 0                                        | 0                      | 0                     | 0                        | 0                      | 0                     | 0                        |
| 6319618   | MAK5    | 9.44                   | 7                     | 11                       | 0                                      | 0                                     | 0                                        | 0                      | 0                     | 0                        | 0                      | 0                     | 0                        |
| 398364755 | URB1    | 0                      | 0                     | 0                        | 0                                      | 0                                     | 0                                        | 0                      | 0                     | 0                        | 0                      | 0                     | 0                        |
| 6320780   | POL5    | 4.79                   | 4                     | 4                        | 0                                      | 0                                     | 0                                        | 1.47                   | 1                     | 1                        | 0                      | 0                     | 0                        |
| 6325021   | RVB2    | 18.47                  | 7                     | 34                       | 5.10                                   | 2                                     | 2                                        | 6.58                   | 2                     | 3                        | 0                      | 0                     | 0                        |
| 6322350   | CCT7    | 15.64                  | 6                     | 48                       | 16.36                                  | 7                                     | 66                                       | 8.91                   | 4                     | 21                       | 0                      | 0                     | 0                        |
| 14270688  | UTP20   | 1.20                   | 3                     | 3                        | 0                                      | 0                                     | 0                                        | 0                      | 0                     | 0                        | 0                      | 0                     | 0                        |
| 6324197   | KRE33   | 5.40                   | 4                     | 5                        | 0                                      | 0                                     | 0                                        | 0                      | 0                     | 0                        | 0                      | 0                     | 0                        |
| 6321816   | RPN1    | 13.39                  | 11                    | 53                       | 2.52                                   | 2                                     | 2                                        | 5.24                   | 4                     | 9                        | 0                      | 0                     | 0                        |
| 6322901   | NAP1    | 9.83                   | 3                     | 5                        | 4.08                                   | 1                                     | 1                                        | 8.15                   | 2                     | 10                       | 0                      | 0                     | 0                        |
| 6320030   | GLT1    | 6.90                   | 12                    | 135                      | 5.59                                   | 10                                    | 19                                       | 0.65                   | 1                     | 10                       | 0                      | 0                     | 0                        |
| 6323470   | CAR2    | 6.84                   | 2                     | 9                        | 14.39                                  | 3                                     | 12                                       | 11.79                  | 3                     | 12                       | 0                      | 0                     | 0                        |
| 6320956   | KAP123  | 16.80                  | 13                    | 66                       | 10.15                                  | 8                                     | 42                                       | 8.09                   | 7                     | 34                       | 0                      | 0                     | 0                        |
| 398365941 | SEC7    | 4.13                   | 7                     | 9                        | 1.99                                   | 2                                     | 2                                        | 0.70                   | 1                     | 1                        | 0                      | 0                     | 0                        |
| 6323324   | GSP1    | 14.61                  | 3                     | 27                       | 9.59                                   | 2                                     | 6                                        | 5.02                   | 1                     | 1                        | 0                      | 0                     | 0                        |
| 6322697   | GPM1    | 36.44                  | 7                     | 433                      | 29.15                                  | 6                                     | 24                                       | 27.94                  | 5                     | 123                      | 0                      | 0                     | 0                        |
| 6325013   | SRP68   | 2.17                   | 1                     | 11                       | 1.34                                   | 1                                     | 2                                        | 0                      | 0                     | 0                        | 0                      | 0                     | 0                        |
| 6322103   | AVT7    | 0                      | 0                     | 0                        | 1.63                                   | 1                                     | 14                                       | 0                      | 0                     | 0                        | 0                      | 0                     | 0                        |
| 6322049   | CCT2    | 32.26                  | 12                    | 51                       | 20.30                                  | 8                                     | 38                                       | 14.99                  | 5                     | 28                       | 0                      | 0                     | 0                        |
| 330443694 | SLA2    | 19.42                  | 14                    | 86                       | 3.00                                   | 2                                     | 2                                        | 0                      | 0                     | 0                        | 0                      | 0                     | 0                        |
| 6321804   | YSC84   | 12.18                  | 5                     | 20                       | 0                                      | 0                                     | 0                                        | 0                      | 0                     | 0                        | 0                      | 0                     | 0                        |
| 398366021 | CCT6    | 8.24                   | 4                     | 52                       | 11.17                                  | 5                                     | 15                                       | 3.66                   | 1                     | 1                        | 0                      | 0                     | 0                        |
| 6324042   | SEC21   | 8.66                   | 5                     | 6                        | 3.32                                   | 2                                     | 5                                        | 5.45                   | 4                     | 14                       | 0                      | 0                     | 0                        |
| 398364741 | SCS2    | 11.48                  | 2                     | 5                        | 11.89                                  | 2                                     | 9                                        | 27.05                  | 4                     | 16                       | 0                      | 0                     | 0                        |
| 6325253   | LSP1    | 29.91                  | 8                     | 86                       | 13.20                                  | 3                                     | 17                                       | 10.26                  | 2                     | 20                       | 0                      | 0                     | 0                        |
| 6321390   | RPT6    | 15.06                  | 5                     | 17                       | 10.37                                  | 3                                     | 28                                       | 14.07                  | 4                     | 27                       | 0                      | 0                     | 0                        |
| 398364807 | PNC1    | 13.43                  | 2                     | 129                      | 13.43                                  | 2                                     | 7                                        | 9.26                   | 1                     | 1                        | 0                      | 0                     | 0                        |
| 6325164   | NOG1    | 17.62                  | 8                     | 12                       | 2.78                                   | 1                                     | 12                                       | 2.01                   | 1                     | 1                        | 0                      | 0                     | 0                        |
| 6319814   | GRX1    | 20.00                  | 2                     | 6                        | 25.45                                  | 2                                     | 14                                       | 11.82                  | 1                     | 1                        | 0                      | 0                     | 0                        |
| 6322823   | MAE1    | 5.68                   | 3                     | 4                        | 1.20                                   | 1                                     | 1                                        | 2.39                   | 1                     | 2                        | 0                      | 0                     | 0                        |

Table S1 - Smith-Kinnaman, *et al* (2014) Abbreviations: %SC = percent sequence coverage, UP = unique peptides, PSM = peptide spectrum matches

| Accession | Acronym | %SC<br>FLAG_Rtr<br>1_1 | UP<br>FLAG_Rtr1<br>_1 | # PSM<br>FLAG_Rtr<br>1_1 | %SC<br>FLAG_Rtr1_<br>ctk1_deleti<br>on | UP<br>FLAG_Rtr<br>1_ctk1_d<br>eletion | # PSM<br>FLAG_Rtr<br>1_ctk1_d<br>eletion | %SC<br>FLAG_Rtr1<br>_2 | UP<br>FLAG_Rtr<br>1_2 | # PSM<br>FLAG_Rtr<br>1_2 | %SC<br>Rpb3_TA<br>P_WT | UP<br>Rpb3_TA<br>P_WT | # PSM<br>Rpb3_TA<br>P_WT |
|-----------|---------|------------------------|-----------------------|--------------------------|----------------------------------------|---------------------------------------|------------------------------------------|------------------------|-----------------------|--------------------------|------------------------|-----------------------|--------------------------|
| 6320255   | TPI1    | 15.32                  | 3                     | 139                      | 0                                      | 0                                     | 0                                        | 14.52                  | 2                     | 2                        | 0                      | 0                     | 0                        |
| 6320983   | GDI1    | 3.10                   | 1                     | 15                       | 4.21                                   | 1                                     | 1                                        | 3.10                   | 1                     | 6                        | 0                      | 0                     | 0                        |
| 398365205 | RPT5    | 24.65                  | 8                     | 29                       | 12.21                                  | 4                                     | 12                                       | 13.13                  | 4                     | 10                       | 0                      | 0                     | 0                        |
| 6324992   | KEL3    | 6.30                   | 3                     | 4                        | 0                                      | 0                                     | 0                                        | 0                      | 0                     | 0                        | 0                      | 0                     | 0                        |
| 6323028   | DNM1    | 1.59                   | 1                     | 1                        | 0                                      | 0                                     | 0                                        | 1.85                   | 1                     | 1                        | 0                      | 0                     | 0                        |
| 398365977 | RPT4    | 10.07                  | 4                     | 15                       | 10.98                                  | 4                                     | 26                                       | 2.52                   | 1                     | 4                        | 0                      | 0                     | 0                        |
| 6320058   | CCT4    | 11.74                  | 6                     | 70                       | 9.66                                   | 4                                     | 48                                       | 10.98                  | 4                     | 48                       | 0                      | 0                     | 0                        |
| 6320379   | HMO1    | 16.67                  | 3                     | 29                       | 4.88                                   | 1                                     | 2                                        | 0                      | 0                     | 0                        | 0                      | 0                     | 0                        |
| 6322508   | CYC1    | 7.34                   | 1                     | 1                        | 0                                      | 0                                     | 0                                        | 0                      | 0                     | 0                        | 0                      | 0                     | 0                        |
| 6325137   | VPS30   | 0                      | 0                     | 0                        | 0                                      | 0                                     | 0                                        | 0                      | 0                     | 0                        | 0                      | 0                     | 0                        |
| 6321301   | SEC27   | 8.10                   | 6                     | 10                       | 3.04                                   | 2                                     | 5                                        | 2.70                   | 1                     | 1                        | 0                      | 0                     | 0                        |
| 6321673   | YHB1    | 6.77                   | 2                     | 15                       | 0                                      | 0                                     | 0                                        | 3.51                   | 1                     | 1                        | 0                      | 0                     | 0                        |
| 27469359  | SYN8    | 13.33                  | 3                     | 6                        | 0                                      | 0                                     | 0                                        | 5.88                   | 1                     | 6                        | 0                      | 0                     | 0                        |
| 6324433   | CDC33   | 25.82                  | 6                     | 94                       | 0                                      | 0                                     | 0                                        | 12.68                  | 2                     | 12                       | 0                      | 0                     | 0                        |
| 6323571   | POB3    | 3.62                   | 2                     | 2                        | 0                                      | 0                                     | 0                                        | 0                      | 0                     | 0                        | 0                      | 0                     | 0                        |
| 398365157 | NOP2    | 19.09                  | 9                     | 65                       | 0                                      | 0                                     | 0                                        | 0                      | 0                     | 0                        | 0                      | 0                     | 0                        |
| 6321228   | YPT32   | 30.18                  | 5                     | 6                        | 16.22                                  | 3                                     | 7                                        | 5.86                   | 1                     | 1                        | 0                      | 0                     | 0                        |
| 398366559 | RPT3    | 4.91                   | 2                     | 10                       | 7.01                                   | 2                                     | 13                                       | 8.64                   | 2                     | 3                        | 0                      | 0                     | 0                        |
| 6322704   | RPT1    | 11.56                  | 5                     | 27                       | 10.71                                  | 4                                     | 9                                        | 5.78                   | 2                     | 5                        | 0                      | 0                     | 0                        |
| 398366379 | PRT1    | 13.50                  | 8                     | 14                       | 2.62                                   | 2                                     | 2                                        | 6.95                   | 3                     | 6                        | 0                      | 0                     | 0                        |
| 398365125 | PDA1    | 2.14                   | 1                     | 1                        | 4.76                                   | 2                                     | 18                                       | 2.62                   | 1                     | 6                        | 0                      | 0                     | 0                        |
| 398364913 | GND1    | 19.43                  | 8                     | 91                       | 5.52                                   | 2                                     | 11                                       | 6.34                   | 2                     | 9                        | 0                      | 0                     | 0                        |
| 6322637   | SAC1    | 0                      | 0                     | 0                        | 4.82                                   | 2                                     | 6                                        | 7.54                   | 3                     | 11                       | 0                      | 0                     | 0                        |
| 398365933 | CYS4    | 25.05                  | 12                    | 124                      | 3.35                                   | 1                                     | 11                                       | 16.77                  | 5                     | 13                       | 0                      | 0                     | 0                        |
| 6323903   | FAA4    | 7.06                   | 4                     | 28                       | 5.33                                   | 3                                     | 7                                        | 3.46                   | 2                     | 34                       | 0                      | 0                     | 0                        |
| 6319806   | PDI1    | 17.62                  | 7                     | 59                       | 9.39                                   | 3                                     | 23                                       | 19.54                  | 6                     | 69                       | 0                      | 0                     | 0                        |
| 6323512   | PHO84   | 10.73                  | 6                     | 73                       | 9.88                                   | 3                                     | 33                                       | 17.21                  | 8                     | 305                      | 0                      | 0                     | 0                        |
| 6325367   | RPC40   | 17.01                  | 4                     | 34                       | 5.37                                   | 1                                     | 2                                        | 0                      | 0                     | 0                        | 0                      | 0                     | 0                        |
| 6319835   | GBP2    | 5.15                   | 2                     | 3                        | 0                                      | 0                                     | 0                                        | 0                      | 0                     | 0                        | 0                      | 0                     | 0                        |
| 6319290   | MYO4    | 0.68                   | 1                     | 1                        | 0                                      | 0                                     | 0                                        | 1.22                   | 1                     | 1                        | 0                      | 0                     | 0                        |
| 14318531  | GCN20   | 11.44                  | 8                     | 43                       | 0                                      | 0                                     | 0                                        | 1.86                   | 1                     | 1                        | 0                      | 0                     | 0                        |
| 6320869   | YPT31   | 16.14                  | 3                     | 4                        | 16.14                                  | 3                                     | 7                                        | 11.21                  | 2                     | 2                        | 0                      | 0                     | 0                        |
| 398365617 | UTP22   | 5.25                   | 5                     | 7                        | 0                                      | 0                                     | 0                                        | 2.18                   | 2                     | 2                        | 0                      | 0                     | 0                        |
| 398366209 | RTN1    | 9.83                   | 2                     | 9                        | 9.83                                   | 2                                     | 10                                       | 9.83                   | 2                     | 3                        | 0                      | 0                     | 0                        |
| 6325097   | CDC60   | 11.74                  | 10                    | 24                       | 4.50                                   | 4                                     | 14                                       | 3.12                   | 3                     | 5                        | 0                      | 0                     | 0                        |
| 6323294   | RPS28B  | 31.34                  | 2                     | 80                       | 13.43                                  | 1                                     | 1                                        | 17.91                  | 1                     | 6                        | 0                      | 0                     | 0                        |
| 6325151   | SSE1    | 23.95                  | 15                    | 74                       | 15.15                                  | 8                                     | 24                                       | 14.29                  | 7                     | 43                       | 0                      | 0                     | 0                        |





Table S1 - Smith-Kinnaman, *et al* (2014) Abbreviations: %SC = percent sequence coverage, UP = unique peptides, PSM = peptide spectrum matches

| Accession | Acronym | %SC<br>FLAG_Rtr<br>1_1 | UP<br>FLAG_Rtr1<br>_1 | # PSM<br>FLAG_Rtr<br>1_1 | %SC<br>FLAG_Rtr1_<br>ctk1_deleti<br>on | UP<br>FLAG_Rtr<br>1_ctk1_d<br>eletion | # PSM<br>FLAG_Rtr<br>1_ctk1_d<br>eletion | %SC<br>FLAG_Rtr1<br>_2 | UP<br>FLAG_Rtr<br>1_2 | # PSM<br>FLAG_Rtr<br>1_2 | %SC<br>Rpb3_TA<br>P_WT | UP<br>Rpb3_TA<br>P_WT | # PSM<br>Rpb3_TA<br>P_WT |
|-----------|---------|------------------------|-----------------------|--------------------------|----------------------------------------|---------------------------------------|------------------------------------------|------------------------|-----------------------|--------------------------|------------------------|-----------------------|--------------------------|
| 398366337 | APL6    | 10.38                  | 8                     | 12                       | 0                                      | 0                                     | 0                                        | 0                      | 0                     | 0                        | 0                      | 0                     | 0                        |
| 6320242   | KRS1    | 17.26                  | 9                     | 15                       | 0                                      | 0                                     | 0                                        | 0                      | 0                     | 0                        | 0                      | 0                     | 0                        |
| 6324705   | YOR131C | 0                      | 0                     | 0                        | 0                                      | 0                                     | 0                                        | 0                      | 0                     | 0                        | 0                      | 0                     | 0                        |
| 6319760   | SSH1    | 0                      | 0                     | 0                        | 4.29                                   | 1                                     | 1                                        | 0                      | 0                     | 0                        | 0                      | 0                     | 0                        |
| 6323335   | ACO1    | 12.85                  | 8                     | 11                       | 3.34                                   | 2                                     | 3                                        | 0                      | 0                     | 0                        | 0                      | 0                     | 0                        |
| 330443748 | GLN1    | 9.19                   | 3                     | 5                        | 0                                      | 0                                     | 0                                        | 0                      | 0                     | 0                        | 0                      | 0                     | 0                        |
| 6319464   | SLA1    | 8.68                   | 6                     | 16                       | 0                                      | 0                                     | 0                                        | 0                      | 0                     | 0                        | 0                      | 0                     | 0                        |
| 14627173  | BBC1    | 12.53                  | 12                    | 27                       | 0                                      | 0                                     | 0                                        | 0                      | 0                     | 0                        | 0                      | 0                     | 0                        |
| 398364931 | URB2    | 0                      | 0                     | 0                        | 0                                      | 0                                     | 0                                        | 0                      | 0                     | 0                        | 0                      | 0                     | 0                        |
| 6325423   | RHO1    | 0                      | 0                     | 0                        | 0                                      | 0                                     | 0                                        | 0                      | 0                     | 0                        | 0                      | 0                     | 0                        |
| 6321837   | AAP1    | 2.69                   | 2                     | 2                        | 0                                      | 0                                     | 0                                        | 1.64                   | 1                     | 2                        | 0                      | 0                     | 0                        |
| 6319281   | RBG1    | 11.11                  | 3                     | 3                        | 0                                      | 0                                     | 0                                        | 4.34                   | 1                     | 3                        | 0                      | 0                     | 0                        |
| 6323379   | KAP95   | 4.88                   | 4                     | 9                        | 0                                      | 0                                     | 0                                        | 3.72                   | 2                     | 3                        | 0                      | 0                     | 0                        |
| 398366047 | RNR4    | 24.64                  | 7                     | 122                      | 5.51                                   | 1                                     | 2                                        | 10.14                  | 2                     | 11                       | 0                      | 0                     | 0                        |
| 6322446   | CCT3    | 29.59                  | 14                    | 69                       | 4.12                                   | 2                                     | 28                                       | 10.49                  | 4                     | 15                       | 0                      | 0                     | 0                        |
| 398365063 | LAT1    | 7.26                   | 3                     | 5                        | 13.69                                  | 6                                     | 59                                       | 27.80                  | 7                     | 48                       | 0                      | 0                     | 0                        |
| 6322427   | HCA4    | 3.64                   | 2                     | 7                        | 0.91                                   | 1                                     | 1                                        | 0                      | 0                     | 0                        | 0                      | 0                     | 0                        |
| 6322073   | RHO3    | 0                      | 0                     | 0                        | 5.63                                   | 1                                     | 1                                        | 0                      | 0                     | 0                        | 0                      | 0                     | 0                        |
| 6324630   | NOB1    | 1.96                   | 1                     | 2                        | 0                                      | 0                                     | 0                                        | 0                      | 0                     | 0                        | 0                      | 0                     | 0                        |
| 398364409 | RET2    | 2.93                   | 2                     | 3                        | 0                                      | 0                                     | 0                                        | 0                      | 0                     | 0                        | 0                      | 0                     | 0                        |
| 6319796   | SPB1    | 4.52                   | 3                     | 4                        | 0                                      | 0                                     | 0                                        | 0                      | 0                     | 0                        | 0                      | 0                     | 0                        |
| 6323968   | PSE1    | 2.20                   | 2                     | 4                        | 0                                      | 0                                     | 0                                        | 0                      | 0                     | 0                        | 0                      | 0                     | 0                        |
| 6322934   | RPF2    | 2.62                   | 1                     | 9                        | 0                                      | 0                                     | 0                                        | 0                      | 0                     | 0                        | 0                      | 0                     | 0                        |
| 398365233 | RPS21A  | 25.29                  | 2                     | 22                       | 0                                      | 0                                     | 0                                        | 0                      | 0                     | 0                        | 0                      | 0                     | 0                        |
| 6322325   | RPS21B  | 25.29                  | 2                     | 22                       | 0                                      | 0                                     | 0                                        | 0                      | 0                     | 0                        | 0                      | 0                     | 0                        |
| 398366473 | SSF2    | 0                      | 0                     | 0                        | 0                                      | 0                                     | 0                                        | 0                      | 0                     | 0                        | 0                      | 0                     | 0                        |
| 86559466  | CTT1    | 0                      | 0                     | 0                        | 0                                      | 0                                     | 0                                        | 0                      | 0                     | 0                        | 0                      | 0                     | 0                        |
| 6325449   | QCR2    | 2.72                   | 1                     | 1                        | 8.42                                   | 2                                     | 4                                        | 4.08                   | 1                     | 1                        | 0                      | 0                     | 0                        |
| 6323537   | TSL1    | 5.46                   | 5                     | 5                        | 3.73                                   | 3                                     | 7                                        | 1.46                   | 1                     | 1                        | 0                      | 0                     | 0                        |
| 6320914   | RNR1    | 9.12                   | 6                     | 12                       | 1.58                                   | 1                                     | 1                                        | 1.46                   | 1                     | 2                        | 0                      | 0                     | 0                        |
| 6323182   | ACS2    | 10.25                  | 7                     | 25                       | 2.64                                   | 1                                     | 1                                        | 5.27                   | 2                     | 2                        | 0                      | 0                     | 0                        |
| 6319432   | URA7    | 22.11                  | 11                    | 81                       | 2.42                                   | 1                                     | 3                                        | 7.25                   | 3                     | 4                        | 0                      | 0                     | 0                        |
| 6323135   | MDN1    | 4.13                   | 15                    | 28                       | 0.73                                   | 3                                     | 5                                        | 0.86                   | 3                     | 5                        | 0                      | 0                     | 0                        |
| 398365477 | ATP2    | 16.83                  | 7                     | 27                       | 23.87                                  | 9                                     | 51                                       | 7.44                   | 2                     | 8                        | 0                      | 0                     | 0                        |
| 6322988   | VPS13   | 12.15                  | 30                    | 70                       | 1.11                                   | 3                                     | 3                                        | 2.54                   | 5                     | 10                       | 0                      | 0                     | 0                        |
| 6322794   | TMA19   | 25.15                  | 4                     | 120                      | 9.58                                   | 1                                     | 6                                        | 17.96                  | 2                     | 25                       | 0                      | 0                     | 0                        |
| 6323037   | RLP24   | 5.03                   | 1                     | 1                        | 6.53                                   | 1                                     | 1                                        | 0                      | 0                     | 0                        | 0                      | 0                     | 0                        |

Table S1 - Smith-Kinnaman, *et al* (2014) Abbreviations: %SC = percent sequence coverage, UP = unique peptides, PSM = peptide spectrum matches

| Accession | Acronym | %SC<br>FLAG_Rtr<br>1_1 | UP<br>FLAG_Rtr1<br>_1 | # PSM<br>FLAG_Rtr<br>1_1 | %SC<br>FLAG_Rtr1_<br>ctk1_deleti<br>on | UP<br>FLAG_Rtr<br>1_ctk1_d<br>eletion | # PSM<br>FLAG_Rtr<br>1_ctk1_d<br>eletion | %SC<br>FLAG_Rtr1<br>_2 | UP<br>FLAG_Rtr<br>1_2 | # PSM<br>FLAG_Rtr<br>1_2 | %SC<br>Rpb3_TA<br>P_WT | UP<br>Rpb3_TA<br>P_WT | # PSM<br>Rpb3_TA<br>P_WT |
|-----------|---------|------------------------|-----------------------|--------------------------|----------------------------------------|---------------------------------------|------------------------------------------|------------------------|-----------------------|--------------------------|------------------------|-----------------------|--------------------------|
| 398364441 | NOT3    | 5.38                   | 4                     | 6                        | 1.67                                   | 1                                     | 1                                        | 0                      | 0                     | 0                        | 0                      | 0                     | 0                        |
| 398366191 | RPN13   | 21.15                  | 2                     | 6                        | 21.15                                  | 2                                     | 4                                        | 0                      | 0                     | 0                        | 0                      | 0                     | 0                        |
| 6321453   | YGR016W | 5.26                   | 1                     | 2                        | 0                                      | 0                                     | 0                                        | 0                      | 0                     | 0                        | 0                      | 0                     | 0                        |
| 6320930   | ILV1    | 1.39                   | 1                     | 2                        | 0                                      | 0                                     | 0                                        | 0                      | 0                     | 0                        | 0                      | 0                     | 0                        |
| 6323016   | PUF3    | 1.93                   | 2                     | 3                        | 0                                      | 0                                     | 0                                        | 0                      | 0                     | 0                        | 0                      | 0                     | 0                        |
| 37362700  | SRP72   | 7.19                   | 3                     | 3                        | 0                                      | 0                                     | 0                                        | 0                      | 0                     | 0                        | 0                      | 0                     | 0                        |
| 6321326   | TAF6    | 8.91                   | 3                     | 7                        | 0                                      | 0                                     | 0                                        | 0                      | 0                     | 0                        | 0                      | 0                     | 0                        |
| 6322565   | ADO1    | 11.47                  | 3                     | 10                       | 0                                      | 0                                     | 0                                        | 0                      | 0                     | 0                        | 0                      | 0                     | 0                        |
| 6319722   | ISW1    | 6.29                   | 6                     | 11                       | 0                                      | 0                                     | 0                                        | 0                      | 0                     | 0                        | 0                      | 0                     | 0                        |
| 330443605 | SET2    | 9.96                   | 6                     | 12                       | 0                                      | 0                                     | 0                                        | 0                      | 0                     | 0                        | 0                      | 0                     | 0                        |
| 398365101 | ARP3    | 7.35                   | 3                     | 58                       | 0                                      | 0                                     | 0                                        | 0                      | 0                     | 0                        | 0                      | 0                     | 0                        |
| 6321780   | STE20   | 25.77                  | 17                    | 85                       | 0                                      | 0                                     | 0                                        | 0                      | 0                     | 0                        | 0                      | 0                     | 0                        |
| 6321776   | PRS3    | 6.56                   | 2                     | 2                        | 2.81                                   | 1                                     | 1                                        | 5.94                   | 1                     | 1                        | 0                      | 0                     | 0                        |
| 6323214   | RPL37A  | 0                      | 0                     | 0                        | 11.36                                  | 1                                     | 1                                        | 11.36                  | 1                     | 1                        | 0                      | 0                     | 0                        |
| 6321757   | ECM29   | 4.66                   | 7                     | 10                       | 1.93                                   | 3                                     | 5                                        | 1.28                   | 2                     | 2                        | 0                      | 0                     | 0                        |
| 398365069 | ADH5    | 2.28                   | 1                     | 69                       | 2.28                                   | 1                                     | 6                                        | 2.28                   | 1                     | 2                        | 0                      | 0                     | 0                        |
| 398365695 | CPR8    | 0                      | 0                     | 0                        | 0                                      | 0                                     | 0                                        | 4.22                   | 1                     | 4                        | 0                      | 0                     | 0                        |
| 6319854   | RVS161  | 16.60                  | 4                     | 21                       | 11.70                                  | 2                                     | 4                                        | 13.21                  | 3                     | 6                        | 0                      | 0                     | 0                        |
| 6324620   | DBP5    | 14.52                  | 7                     | 26                       | 2.70                                   | 1                                     | 2                                        | 7.47                   | 3                     | 7                        | 0                      | 0                     | 0                        |
| 6321399   | YGL039W | 9.20                   | 2                     | 2                        | 0                                      | 0                                     | 0                                        | 13.51                  | 3                     | 12                       | 0                      | 0                     | 0                        |
| 398365061 | SUP45   | 11.90                  | 5                     | 11                       | 5.49                                   | 2                                     | 5                                        | 9.61                   | 3                     | 14                       | 0                      | 0                     | 0                        |
| 6324673   | KTR1    | 4.58                   | 2                     | 2                        | 0                                      | 0                                     | 0                                        | 11.45                  | 4                     | 34                       | 0                      | 0                     | 0                        |
| 6323387   | ILV5    | 23.04                  | 8                     | 32                       | 10.13                                  | 3                                     | 9                                        | 21.77                  | 6                     | 42                       | 0                      | 0                     | 0                        |
| 6323795   | TIF34   | 17.58                  | 5                     | 10                       | 4.32                                   | 1                                     | 1                                        | 0                      | 0                     | 0                        | 0                      | 0                     | 0                        |
| 6322667   | PRS1    | 9.84                   | 3                     | 9                        | 2.58                                   | 1                                     | 6                                        | 0                      | 0                     | 0                        | 0                      | 0                     | 0                        |
| 6320910   | RGI1    | 8.07                   | 1                     | 1                        | 0                                      | 0                                     | 0                                        | 0                      | 0                     | 0                        | 0                      | 0                     | 0                        |
| 398365575 | HOM6    | 8.91                   | 3                     | 4                        | 0                                      | 0                                     | 0                                        | 0                      | 0                     | 0                        | 0                      | 0                     | 0                        |
| 6323916   | TIF11   | 26.14                  | 4                     | 5                        | 0                                      | 0                                     | 0                                        | 0                      | 0                     | 0                        | 0                      | 0                     | 0                        |
| 6321612   | RBG2    | 17.93                  | 5                     | 8                        | 0                                      | 0                                     | 0                                        | 0                      | 0                     | 0                        | 0                      | 0                     | 0                        |
| 6323225   | PWP1    | 13.54                  | 6                     | 13                       | 0                                      | 0                                     | 0                                        | 0                      | 0                     | 0                        | 0                      | 0                     | 0                        |
| 6324737   | SSP1    | 21.81                  | 4                     | 31                       | 0                                      | 0                                     | 0                                        | 0                      | 0                     | 0                        | 0                      | 0                     | 0                        |
| 6323450   | CDC73   | 25.95                  | 8                     | 78                       | 0                                      | 0                                     | 0                                        | 0                      | 0                     | 0                        | 0                      | 0                     | 0                        |
| 398365461 | SRP40   | 0                      | 0                     | 0                        | 0                                      | 0                                     | 0                                        | 0                      | 0                     | 0                        | 0                      | 0                     | 0                        |
| 6320708   | RPL37B  | 0                      | 0                     | 0                        | 0                                      | 0                                     | 0                                        | 0                      | 0                     | 0                        | 0                      | 0                     | 0                        |
| 398364957 | MKT1    | 2.53                   | 1                     | 1                        | 0                                      | 0                                     | 0                                        | 1.81                   | 1                     | 1                        | 0                      | 0                     | 0                        |
| 6320079   | YDL124W | 11.54                  | 3                     | 6                        | 8.33                                   | 2                                     | 2                                        | 4.49                   | 1                     | 2                        | 0                      | 0                     | 0                        |
| 398364371 | RSC8    | 13.29                  | 6                     | 7                        | 0                                      | 0                                     | 0                                        | 5.57                   | 2                     | 2                        | 0                      | 0                     | 0                        |

Table S1 - Smith-Kinnaman, *et al* (2014) Abbreviations: %SC = percent sequence coverage, UP = unique peptides, PSM = peptide spectrum matches

| Accession | Acronym  | %SC<br>FLAG_Rtr<br>1_1 | UP<br>FLAG_Rtr1<br>_1 | # PSM<br>FLAG_Rtr<br>1_1 | %SC<br>FLAG_Rtr1_<br>ctk1_deleti<br>on | UP<br>FLAG_Rtr<br>1_ctk1_d<br>eletion | # PSM<br>FLAG_Rtr<br>1_ctk1_d<br>eletion | %SC<br>FLAG_Rtr1<br>_2 | UP<br>FLAG_Rtr<br>1_2 | # PSM<br>FLAG_Rtr<br>1_2 | %SC<br>Rpb3_TA<br>P_WT | UP<br>Rpb3_TA<br>P_WT | # PSM<br>Rpb3_TA<br>P_WT |
|-----------|----------|------------------------|-----------------------|--------------------------|----------------------------------------|---------------------------------------|------------------------------------------|------------------------|-----------------------|--------------------------|------------------------|-----------------------|--------------------------|
| 6325418   | GPH1     | 1.11                   | 1                     | 1                        | 2.66                                   | 2                                     | 2                                        | 1.44                   | 1                     | 3                        | 0                      | 0                     | 0                        |
| 6321859   | DYS1     | 2.33                   | 1                     | 3                        | 7.49                                   | 2                                     | 2                                        | 7.49                   | 2                     | 3                        | 0                      | 0                     | 0                        |
| 6323967   | GAS1     | 7.51                   | 3                     | 3                        | 2.50                                   | 1                                     | 1                                        | 2.50                   | 1                     | 7                        | 0                      | 0                     | 0                        |
| 6319695   | PYC2     | 6.27                   | 7                     | 13                       | 0.85                                   | 1                                     | 1                                        | 3.56                   | 3                     | 8                        | 0                      | 0                     | 0                        |
| 6323642   | YPT7     | 0                      | 0                     | 0                        | 12.02                                  | 2                                     | 5                                        | 18.27                  | 2                     | 9                        | 0                      | 0                     | 0                        |
| 6320552   | HXT3     | 2.12                   | 1                     | 1                        | 2.12                                   | 1                                     | 2                                        | 12.35                  | 4                     | 11                       | 0                      | 0                     | 0                        |
| 6325196   | ALD6     | 25.60                  | 10                    | 75                       | 6.60                                   | 2                                     | 3                                        | 9.80                   | 3                     | 12                       | 0                      | 0                     | 0                        |
| 6319315   | EFB1     | 42.72                  | 6                     | 153                      | 8.25                                   | 1                                     | 1                                        | 8.25                   | 1                     | 14                       | 0                      | 0                     | 0                        |
| 10383811  | CDC39    | 0.90                   | 2                     | 2                        | 0.76                                   | 1                                     | 1                                        | 0                      | 0                     | 0                        | 0                      | 0                     | 0                        |
| 6321753   | SBP1     | 6.80                   | 2                     | 2                        | 5.78                                   | 1                                     | 1                                        | 0                      | 0                     | 0                        | 0                      | 0                     | 0                        |
| 6320764   | DLD3     | 9.68                   | 4                     | 12                       | 3.23                                   | 1                                     | 1                                        | 0                      | 0                     | 0                        | 0                      | 0                     | 0                        |
| 398366413 | ERV29    | 0                      | 0                     | 0                        | 7.74                                   | 2                                     | 2                                        | 0                      | 0                     | 0                        | 0                      | 0                     | 0                        |
| 6320969   | GLO3     | 2.23                   | 1                     | 1                        | 1.42                                   | 1                                     | 12                                       | 0                      | 0                     | 0                        | 0                      | 0                     | 0                        |
| 6319602   | TPS1     | 2.02                   | 1                     | 1                        | 8.48                                   | 3                                     | 28                                       | 0                      | 0                     | 0                        | 0                      | 0                     | 0                        |
| 6579193   | NMD2     | 0.83                   | 1                     | 1                        | 0                                      | 0                                     | 0                                        | 0                      | 0                     | 0                        | 0                      | 0                     | 0                        |
| 6321990   | UTP9     | 1.22                   | 1                     | 2                        | 0                                      | 0                                     | 0                                        | 0                      | 0                     | 0                        | 0                      | 0                     | 0                        |
| 398366561 | SXM1     | 2.22                   | 2                     | 2                        | 0                                      | 0                                     | 0                                        | 0                      | 0                     | 0                        | 0                      | 0                     | 0                        |
| 6320157   | NPC2     | 6.94                   | 1                     | 2                        | 0                                      | 0                                     | 0                                        | 0                      | 0                     | 0                        | 0                      | 0                     | 0                        |
| 398364687 | NOP9     | 8.71                   | 5                     | 5                        | 0                                      | 0                                     | 0                                        | 0                      | 0                     | 0                        | 0                      | 0                     | 0                        |
| 22532997  | BUD27    | 2.51                   | 2                     | 5                        | 0                                      | 0                                     | 0                                        | 0                      | 0                     | 0                        | 0                      | 0                     | 0                        |
| 398366449 | BFR2     | 9.18                   | 4                     | 6                        | 0                                      | 0                                     | 0                                        | 0                      | 0                     | 0                        | 0                      | 0                     | 0                        |
| 398365717 | TRM1     | 10.88                  | 5                     | 11                       | 0                                      | 0                                     | 0                                        | 0                      | 0                     | 0                        | 0                      | 0                     | 0                        |
| 6323362   | CHS5     | 11.03                  | 5                     | 12                       | 0                                      | 0                                     | 0                                        | 0                      | 0                     | 0                        | 0                      | 0                     | 0                        |
| 398364573 | PAN1     | 15.34                  | 16                    | 70                       | 0                                      | 0                                     | 0                                        | 0                      | 0                     | 0                        | 0                      | 0                     | 0                        |
| 6320720   | GRX2     | 0                      | 0                     | 0                        | 0                                      | 0                                     | 0                                        | 0                      | 0                     | 0                        | 0                      | 0                     | 0                        |
| 6321595   | PTI1     | 0                      | 0                     | 0                        | 0                                      | 0                                     | 0                                        | 0                      | 0                     | 0                        | 0                      | 0                     | 0                        |
| 398364853 | OCA1     | 0                      | 0                     | 0                        | 0                                      | 0                                     | 0                                        | 0                      | 0                     | 0                        | 0                      | 0                     | 0                        |
| 6323852   | YMR196   | 0                      | 0                     | 0                        | 0                                      | 0                                     | 0                                        | 0                      | 0                     | 0                        | 0                      | 0                     | 0                        |
| 33438816  | YILOO2W- | 0                      | 0                     | 0                        | 0                                      | 0                                     | 0                                        | 0                      | 0                     | 0                        | 0                      | 0                     | 0                        |
| 398366575 | RRP17    | 0                      | 0                     | 0                        | 0                                      | 0                                     | 0                                        | 0                      | 0                     | 0                        | 0                      | 0                     | 0                        |
| 6323359   | TMA10    | 0                      | 0                     | 0                        | 0                                      | 0                                     | 0                                        | 0                      | 0                     | 0                        | 0                      | 0                     | 0                        |
| 398365853 | WTM1     | 13.96                  | 5                     | 20                       | 1.83                                   | 1                                     | 1                                        | 3.20                   | 1                     | 1                        | 0                      | 0                     | 0                        |
| 6320181   | GPD1     | 7.67                   | 3                     | 13                       | 8.44                                   | 3                                     | 11                                       | 3.58                   | 1                     | 1                        | 0                      | 0                     | 0                        |
| 6323518   | NAB6     | 1.23                   | 1                     | 1                        | 0                                      | 0                                     | 0                                        | 1.06                   | 1                     | 1                        | 0                      | 0                     | 0                        |
| 6321221   | KIP3     | 1.12                   | 1                     | 1                        | 0                                      | 0                                     | 0                                        | 1.86                   | 1                     | 1                        | 0                      | 0                     | 0                        |
| 398365131 | RFC2     | 9.63                   | 3                     | 4                        | 0                                      | 0                                     | 0                                        | 2.27                   | 1                     | 1                        | 0                      | 0                     | 0                        |
| 6322294   | ERG20    | 9.09                   | 3                     | 12                       | 0                                      | 0                                     | 0                                        | 3.98                   | 1                     | 1                        | 0                      | 0                     | 0                        |





Table S1 - Smith-Kinnaman, *et al* (2014) Abbreviations: %SC = percent sequence coverage, UP = unique peptides, PSM = peptide spectrum matches

| Accession | Acronym | %SC<br>FLAG_Rtr<br>1_1 | UP<br>FLAG_Rtr1<br>_1 | # PSM<br>FLAG_Rtr<br>1_1 | %SC<br>FLAG_Rtr1_<br>ctk1_deleti<br>on | UP<br>FLAG_Rtr<br>1_ctk1_d<br>eletion | # PSM<br>FLAG_Rtr<br>1_ctk1_d<br>eletion | %SC<br>FLAG_Rtr1<br>_2 | UP<br>FLAG_Rtr<br>1_2 | # PSM<br>FLAG_Rtr<br>1_2 | %SC<br>Rpb3_TA<br>P_WT | UP<br>Rpb3_TA<br>P_WT | # PSM<br>Rpb3_TA<br>P_WT |
|-----------|---------|------------------------|-----------------------|--------------------------|----------------------------------------|---------------------------------------|------------------------------------------|------------------------|-----------------------|--------------------------|------------------------|-----------------------|--------------------------|
| 6324550   | IFM1    | 1.78                   | 1                     | 1                        | 0                                      | 0                                     | 0                                        | 0                      | 0                     | 0                        | 0                      | 0                     | 0                        |
| 6324950   | ALD4    | 1.73                   | 1                     | 1                        | 0                                      | 0                                     | 0                                        | 0                      | 0                     | 0                        | 0                      | 0                     | 0                        |
| 6324635   | CKA2    | 2.65                   | 1                     | 1                        | 0                                      | 0                                     | 0                                        | 0                      | 0                     | 0                        | 0                      | 0                     | 0                        |
| 6319849   | YCP4    | 4.86                   | 1                     | 1                        | 0                                      | 0                                     | 0                                        | 0                      | 0                     | 0                        | 0                      | 0                     | 0                        |
| 6325202   | LGE1    | 2.71                   | 1                     | 1                        | 0                                      | 0                                     | 0                                        | 0                      | 0                     | 0                        | 0                      | 0                     | 0                        |
| 398366027 | SUR4    | 4.93                   | 1                     | 1                        | 0                                      | 0                                     | 0                                        | 0                      | 0                     | 0                        | 0                      | 0                     | 0                        |
| 6321641   | PCT1    | 6.60                   | 2                     | 2                        | 0                                      | 0                                     | 0                                        | 0                      | 0                     | 0                        | 0                      | 0                     | 0                        |
| 6325280   | EAF3    | 6.48                   | 2                     | 2                        | 0                                      | 0                                     | 0                                        | 0                      | 0                     | 0                        | 0                      | 0                     | 0                        |
| 6320803   | MCM3    | 2.88                   | 2                     | 2                        | 0                                      | 0                                     | 0                                        | 0                      | 0                     | 0                        | 0                      | 0                     | 0                        |
| 6323872   | SKY1    | 4.58                   | 2                     | 2                        | 0                                      | 0                                     | 0                                        | 0                      | 0                     | 0                        | 0                      | 0                     | 0                        |
| 6325140   | IDI1    | 4.51                   | 1                     | 2                        | 0                                      | 0                                     | 0                                        | 0                      | 0                     | 0                        | 0                      | 0                     | 0                        |
| 6320049   | SAS10   | 10.82                  | 4                     | 4                        | 0                                      | 0                                     | 0                                        | 0                      | 0                     | 0                        | 0                      | 0                     | 0                        |
| 6324989   | DIM1    | 11.01                  | 3                     | 5                        | 0                                      | 0                                     | 0                                        | 0                      | 0                     | 0                        | 0                      | 0                     | 0                        |
| 398366039 | PBP1    | 9.97                   | 5                     | 7                        | 0                                      | 0                                     | 0                                        | 0                      | 0                     | 0                        | 0                      | 0                     | 0                        |
| 6323088   | REX2    | 9.67                   | 2                     | 8                        | 0                                      | 0                                     | 0                                        | 0                      | 0                     | 0                        | 0                      | 0                     | 0                        |
| 6324899   | PRO2    | 11.18                  | 4                     | 10                       | 0                                      | 0                                     | 0                                        | 0                      | 0                     | 0                        | 0                      | 0                     | 0                        |
| 398365467 | YNL010W | 7.47                   | 2                     | 16                       | 0                                      | 0                                     | 0                                        | 0                      | 0                     | 0                        | 0                      | 0                     | 0                        |
| 41629671  | SEA4    | 13.58                  | 11                    | 21                       | 0                                      | 0                                     | 0                                        | 0                      | 0                     | 0                        | 0                      | 0                     | 0                        |
| 6320704   | PUF6    | 0                      | 0                     | 0                        | 0                                      | 0                                     | 0                                        | 0                      | 0                     | 0                        | 0                      | 0                     | 0                        |
| 6323650   | PLB1    | 0                      | 0                     | 0                        | 0                                      | 0                                     | 0                                        | 0                      | 0                     | 0                        | 0                      | 0                     | 0                        |
| 6323158   | DIP2    | 0                      | 0                     | 0                        | 0                                      | 0                                     | 0                                        | 0                      | 0                     | 0                        | 0                      | 0                     | 0                        |
| 6322727   | SRP21   | 0                      | 0                     | 0                        | 0                                      | 0                                     | 0                                        | 0                      | 0                     | 0                        | 0                      | 0                     | 0                        |
| 14318504  | MDJ1    | 0                      | 0                     | 0                        | 0                                      | 0                                     | 0                                        | 0                      | 0                     | 0                        | 0                      | 0                     | 0                        |
| 6322878   | GCN3    | 0                      | 0                     | 0                        | 0                                      | 0                                     | 0                                        | 0                      | 0                     | 0                        | 0                      | 0                     | 0                        |
| 330443380 | PSK1    | 0                      | 0                     | 0                        | 0                                      | 0                                     | 0                                        | 0                      | 0                     | 0                        | 0                      | 0                     | 0                        |
| 398364789 | UFD4    | 0                      | 0                     | 0                        | 0                                      | 0                                     | 0                                        | 0                      | 0                     | 0                        | 0                      | 0                     | 0                        |
| 6319903   | PWP2    | 0                      | 0                     | 0                        | 0                                      | 0                                     | 0                                        | 0                      | 0                     | 0                        | 0                      | 0                     | 0                        |
| 6324613   | CKB2    | 0                      | 0                     | 0                        | 0                                      | 0                                     | 0                                        | 0                      | 0                     | 0                        | 0                      | 0                     | 0                        |
| 6324568   | TOP1    | 0                      | 0                     | 0                        | 0                                      | 0                                     | 0                                        | 0                      | 0                     | 0                        | 0                      | 0                     | 0                        |
| 398365393 | MDM32   | 0                      | 0                     | 0                        | 0                                      | 0                                     | 0                                        | 0                      | 0                     | 0                        | 0                      | 0                     | 0                        |
| 6322731   | VPH2    | 0                      | 0                     | 0                        | 0                                      | 0                                     | 0                                        | 0                      | 0                     | 0                        | 0                      | 0                     | 0                        |
| 6323653   | HXT2    | 0                      | 0                     | 0                        | 0                                      | 0                                     | 0                                        | 0                      | 0                     | 0                        | 0                      | 0                     | 0                        |
| 6320236   | MRH1    | 0                      | 0                     | 0                        | 0                                      | 0                                     | 0                                        | 0                      | 0                     | 0                        | 0                      | 0                     | 0                        |
| 398364559 | NSP1    | 0                      | 0                     | 0                        | 1.22                                   | 1                                     | 1                                        | 0.97                   | 1                     | 1                        | 0                      | 0                     | 0                        |
| 6321498   | ADE6    | 8.39                   | 9                     | 14                       | 1.25                                   | 1                                     | 2                                        | 1.18                   | 1                     | 1                        | 0                      | 0                     | 0                        |
| 6319326   | ADE1    | 7.19                   | 2                     | 2                        | 0                                      | 0                                     | 0                                        | 3.92                   | 1                     | 1                        | 0                      | 0                     | 0                        |
| 6321812   | MYO1    | 1.30                   | 2                     | 2                        | 0                                      | 0                                     | 0                                        | 0.57                   | 1                     | 1                        | 0                      | 0                     | 0                        |







Table S1 - Smith-Kinnaman, *et al* (2014) Abbreviations: %SC = percent sequence coverage, UP = unique peptides, PSM = peptide spectrum matches

| Accession | Acronym | %SC<br>FLAG_Rtr<br>1_1 | UP<br>FLAG_Rtr1<br>_1 | # PSM<br>FLAG_Rtr<br>1_1 | %SC<br>FLAG_Rtr1_<br>ctk1_deleti<br>on | UP<br>FLAG_Rtr<br>1_ctk1_d<br>eletion | # PSM<br>FLAG_Rtr<br>1_ctk1_d<br>eletion | %SC<br>FLAG_Rtr1<br>_2 | UP<br>FLAG_Rtr<br>1_2 | # PSM<br>FLAG_Rtr<br>1_2 | %SC<br>Rpb3_TA<br>P_WT | UP<br>Rpb3_TA<br>P_WT | # PSM<br>Rpb3_TA<br>P_WT |
|-----------|---------|------------------------|-----------------------|--------------------------|----------------------------------------|---------------------------------------|------------------------------------------|------------------------|-----------------------|--------------------------|------------------------|-----------------------|--------------------------|
| 6324734   | MTR10   | 0                      | 0                     | 0                        | 0                                      | 0                                     | 0                                        | 0                      | 0                     | 0                        | 0                      | 0                     | 0                        |
| 6320284   | PET100  | 0                      | 0                     | 0                        | 0                                      | 0                                     | 0                                        | 0                      | 0                     | 0                        | 0                      | 0                     | 0                        |
| 6323411   | SEC61   | 0                      | 0                     | 0                        | 0                                      | 0                                     | 0                                        | 0                      | 0                     | 0                        | 0                      | 0                     | 0                        |
| 6320883   | ERG28   | 0                      | 0                     | 0                        | 0                                      | 0                                     | 0                                        | 0                      | 0                     | 0                        | 0                      | 0                     | 0                        |
| 6324593   | YOR019W | 1.78                   | 1                     | 5                        | 1.78                                   | 1                                     | 1                                        | 1.23                   | 1                     | 1                        | 0                      | 0                     | 0                        |
| 6320432   | ADK1    | 24.32                  | 5                     | 89                       | 4.50                                   | 1                                     | 1                                        | 4.50                   | 1                     | 1                        | 0                      | 0                     | 0                        |
| 6322919   | CCP1    | 0                      | 0                     | 0                        | 2.77                                   | 1                                     | 1                                        | 4.71                   | 1                     | 1                        | 0                      | 0                     | 0                        |
| 6320204   | NTH1    | 0                      | 0                     | 0                        | 1.73                                   | 1                                     | 2                                        | 1.73                   | 1                     | 1                        | 0                      | 0                     | 0                        |
| 6320279   | TPS2    | 1.67                   | 1                     | 2                        | 6.14                                   | 4                                     | 9                                        | 1.67                   | 1                     | 1                        | 0                      | 0                     | 0                        |
| 6323681   | CCS1    | 6.02                   | 1                     | 1                        | 0                                      | 0                                     | 0                                        | 4.02                   | 1                     | 1                        | 0                      | 0                     | 0                        |
| 398366097 | ADH6    | 8.06                   | 2                     | 4                        | 0                                      | 0                                     | 0                                        | 5.00                   | 1                     | 1                        | 0                      | 0                     | 0                        |
| 6324381   | NOG2    | 9.67                   | 4                     | 7                        | 0                                      | 0                                     | 0                                        | 2.88                   | 1                     | 1                        | 0                      | 0                     | 0                        |
| 6323974   | PRE5    | 22.65                  | 5                     | 7                        | 0                                      | 0                                     | 0                                        | 5.98                   | 1                     | 1                        | 0                      | 0                     | 0                        |
| 6320090   | ATG20   | 30.00                  | 15                    | 41                       | 0                                      | 0                                     | 0                                        | 2.19                   | 1                     | 1                        | 0                      | 0                     | 0                        |
| 37362683  | SCJ1    | 0                      | 0                     | 0                        | 0                                      | 0                                     | 0                                        | 4.24                   | 1                     | 1                        | 0                      | 0                     | 0                        |
| 6323676   | ARP9    | 0                      | 0                     | 0                        | 0                                      | 0                                     | 0                                        | 2.78                   | 1                     | 1                        | 0                      | 0                     | 0                        |
| 398364547 | SER3    | 2.35                   | 1                     | 1                        | 0                                      | 0                                     | 0                                        | 7.04                   | 2                     | 2                        | 0                      | 0                     | 0                        |
| 6319439   | HEK2    | 6.04                   | 2                     | 2                        | 0                                      | 0                                     | 0                                        | 6.30                   | 2                     | 2                        | 0                      | 0                     | 0                        |
| 6321964   | NMD3    | 6.56                   | 3                     | 7                        | 2.70                                   | 1                                     | 1                                        | 2.70                   | 1                     | 3                        | 0                      | 0                     | 0                        |
| 6321984   | ERG9    | 0                      | 0                     | 0                        | 4.73                                   | 2                                     | 3                                        | 2.70                   | 1                     | 3                        | 0                      | 0                     | 0                        |
| 6323768   | ADE17   | 15.88                  | 7                     | 33                       | 0                                      | 0                                     | 0                                        | 2.53                   | 1                     | 3                        | 0                      | 0                     | 0                        |
| 398365401 | CPA2    | 1.79                   | 2                     | 3                        | 0                                      | 0                                     | 0                                        | 1.43                   | 1                     | 4                        | 0                      | 0                     | 0                        |
| 42742253  | ATG27   | 11.44                  | 3                     | 7                        | 0                                      | 0                                     | 0                                        | 11.07                  | 2                     | 5                        | 0                      | 0                     | 0                        |
| 6324191   | SRV2    | 16.16                  | 6                     | 17                       | 0                                      | 0                                     | 0                                        | 6.08                   | 2                     | 7                        | 0                      | 0                     | 0                        |
| 6322476   | ILV3    | 10.26                  | 6                     | 53                       | 1.54                                   | 1                                     | 5                                        | 2.39                   | 1                     | 9                        | 0                      | 0                     | 0                        |
| 6321900   | GGA2    | 4.79                   | 2                     | 4                        | 0                                      | 0                                     | 0                                        | 7.52                   | 3                     | 11                       | 0                      | 0                     | 0                        |
| 330443535 | STE2    | 6.03                   | 2                     | 14                       | 3.25                                   | 1                                     | 1                                        | 18.56                  | 6                     | 16                       | 0                      | 0                     | 0                        |
| 6324343   | ACC1    | 9.54                   | 19                    | 54                       | 4.75                                   | 8                                     | 23                                       | 4.12                   | 6                     | 18                       | 0                      | 0                     | 0                        |
| 6319434   | APL3    | 4.00                   | 3                     | 3                        | 1.07                                   | 1                                     | 1                                        | 0                      | 0                     | 0                        | 0                      | 0                     | 0                        |
| 398364593 | MET6    | 14.86                  | 10                    | 14                       | 1.17                                   | 1                                     | 1                                        | 0                      | 0                     | 0                        | 0                      | 0                     | 0                        |
| 6323751   | YPK2    | 0                      | 0                     | 0                        | 1.92                                   | 1                                     | 1                                        | 0                      | 0                     | 0                        | 0                      | 0                     | 0                        |
| 330443495 | AIM6    | 0                      | 0                     | 0                        | 3.59                                   | 1                                     | 1                                        | 0                      | 0                     | 0                        | 0                      | 0                     | 0                        |
| 6323752   | PGM2    | 0                      | 0                     | 0                        | 2.28                                   | 1                                     | 1                                        | 0                      | 0                     | 0                        | 0                      | 0                     | 0                        |
| 82795256  | SEC28   | 3.38                   | 1                     | 1                        | 5.41                                   | 1                                     | 2                                        | 0                      | 0                     | 0                        | 0                      | 0                     | 0                        |
| 6322215   | YIR024C | 0                      | 0                     | 0                        | 4.63                                   | 1                                     | 2                                        | 0                      | 0                     | 0                        | 0                      | 0                     | 0                        |
| 6323291   | YPT6    | 5.12                   | 1                     | 1                        | 5.12                                   | 1                                     | 3                                        | 0                      | 0                     | 0                        | 0                      | 0                     | 0                        |
| 6321632   | PDX1    | 4.63                   | 2                     | 2                        | 12.20                                  | 2                                     | 5                                        | 0                      | 0                     | 0                        | 0                      | 0                     | 0                        |





Table S1 - Smith-Kinnaman, *et al* (2014) Abbreviations: %SC = percent sequence coverage, UP = unique peptides, PSM = peptide spectrum matches

| Accession | Acronym   | %SC<br>FLAG_Rtr<br>1_1 | UP<br>FLAG_Rtr1<br>_1 | # PSM<br>FLAG_Rtr<br>1_1 | %SC<br>FLAG_Rtr1_<br>ctk1_deleti<br>on | UP<br>FLAG_Rtr<br>1_ctk1_d<br>eletion | # PSM<br>FLAG_Rtr<br>1_ctk1_d<br>eletion | %SC<br>FLAG_Rtr1<br>_2 | UP<br>FLAG_Rtr<br>1_2 | # PSM<br>FLAG_Rtr<br>1_2 | %SC<br>Rpb3_TA<br>P_WT | UP<br>Rpb3_TA<br>P_WT | # PSM<br>Rpb3_TA<br>P_WT |
|-----------|-----------|------------------------|-----------------------|--------------------------|----------------------------------------|---------------------------------------|------------------------------------------|------------------------|-----------------------|--------------------------|------------------------|-----------------------|--------------------------|
| 6320843   | PAC2      | 0                      | 0                     | 0                        | 0                                      | 0                                     | 0                                        | 0                      | 0                     | 0                        | 0                      | 0                     | 0                        |
| 398365529 | SIR1      | 0                      | 0                     | 0                        | 0                                      | 0                                     | 0                                        | 0                      | 0                     | 0                        | 0                      | 0                     | 0                        |
| 14318435  | TIP20     | 0                      | 0                     | 0                        | 0                                      | 0                                     | 0                                        | 0                      | 0                     | 0                        | 0                      | 0                     | 0                        |
| 6323645   | AIM34     | 0                      | 0                     | 0                        | 0                                      | 0                                     | 0                                        | 0                      | 0                     | 0                        | 0                      | 0                     | 0                        |
| 330443386 | BUD14     | 0                      | 0                     | 0                        | 0                                      | 0                                     | 0                                        | 0                      | 0                     | 0                        | 0                      | 0                     | 0                        |
| 6319751   | CHK1      | 0                      | 0                     | 0                        | 0                                      | 0                                     | 0                                        | 0                      | 0                     | 0                        | 0                      | 0                     | 0                        |
| 6319452   | APN2      | 0                      | 0                     | 0                        | 0                                      | 0                                     | 0                                        | 0                      | 0                     | 0                        | 0                      | 0                     | 0                        |
| 10383783  | YCR015C   | 0                      | 0                     | 0                        | 0                                      | 0                                     | 0                                        | 0                      | 0                     | 0                        | 0                      | 0                     | 0                        |
| 33438820  | YJL133C-A | 0                      | 0                     | 0                        | 0                                      | 0                                     | 0                                        | 0                      | 0                     | 0                        | 0                      | 0                     | 0                        |
| 398365435 | ERG25     | 0                      | 0                     | 0                        | 0                                      | 0                                     | 0                                        | 0                      | 0                     | 0                        | 0                      | 0                     | 0                        |
| 6321363   | MPS2      | 0                      | 0                     | 0                        | 0                                      | 0                                     | 0                                        | 0                      | 0                     | 0                        | 0                      | 0                     | 0                        |
| 6323180   | PCD1      | 0                      | 0                     | 0                        | 0                                      | 0                                     | 0                                        | 0                      | 0                     | 0                        | 0                      | 0                     | 0                        |
| 398364799 | PMD1      | 0                      | 0                     | 0                        | 0                                      | 0                                     | 0                                        | 0                      | 0                     | 0                        | 0                      | 0                     | 0                        |
| 6322709   | TGL1      | 0                      | 0                     | 0                        | 0                                      | 0                                     | 0                                        | 0                      | 0                     | 0                        | 0                      | 0                     | 0                        |
| 6325305   | TAH18     | 0                      | 0                     | 0                        | 0                                      | 0                                     | 0                                        | 0                      | 0                     | 0                        | 0                      | 0                     | 0                        |
| 6322698   | YKL151C   | 0                      | 0                     | 0                        | 0                                      | 0                                     | 0                                        | 0                      | 0                     | 0                        | 0                      | 0                     | 0                        |
| 6322341   | RPE1      | 0                      | 0                     | 0                        | 0                                      | 0                                     | 0                                        | 0                      | 0                     | 0                        | 0                      | 0                     | 0                        |
| 6323336   | STT4      | 0                      | 0                     | 0                        | 0                                      | 0                                     | 0                                        | 0                      | 0                     | 0                        | 0                      | 0                     | 0                        |
| 6320542   | MSN5      | 0                      | 0                     | 0                        | 0                                      | 0                                     | 0                                        | 0                      | 0                     | 0                        | 0                      | 0                     | 0                        |
| 6325171   | ELP3      | 0                      | 0                     | 0                        | 0                                      | 0                                     | 0                                        | 0                      | 0                     | 0                        | 0                      | 0                     | 0                        |
| 6319274   | ERV46     | 0                      | 0                     | 0                        | 0                                      | 0                                     | 0                                        | 0                      | 0                     | 0                        | 0                      | 0                     | 0                        |
| 398366207 | CRM1      | 2.58                   | 3                     | 4                        | 1.38                                   | 1                                     | 1                                        | 1.66                   | 1                     | 1                        | 0                      | 0                     | 0                        |
| 6321198   | CSE1      | 0.94                   | 1                     | 1                        | 1.25                                   | 1                                     | 3                                        | 1.25                   | 1                     | 1                        | 0                      | 0                     | 0                        |
| 398366491 | SKP1      | 12.89                  | 1                     | 1                        | 0                                      | 0                                     | 0                                        | 8.76                   | 1                     | 1                        | 0                      | 0                     | 0                        |
| 6323819   | MLH1      | 1.69                   | 1                     | 1                        | 0                                      | 0                                     | 0                                        | 1.69                   | 1                     | 1                        | 0                      | 0                     | 0                        |
| 398365033 | IRA1      | 0.36                   | 1                     | 1                        | 0                                      | 0                                     | 0                                        | 0.32                   | 1                     | 1                        | 0                      | 0                     | 0                        |
| 398366427 | SRP101    | 1.93                   | 1                     | 1                        | 0                                      | 0                                     | 0                                        | 2.25                   | 1                     | 1                        | 0                      | 0                     | 0                        |
| 6320008   | NUS1      | 4.00                   | 1                     | 1                        | 0                                      | 0                                     | 0                                        | 1.87                   | 1                     | 1                        | 0                      | 0                     | 0                        |
| 6324098   | PDR16     | 7.69                   | 2                     | 2                        | 0                                      | 0                                     | 0                                        | 3.42                   | 1                     | 1                        | 0                      | 0                     | 0                        |
| 6324093   | SIN4      | 2.36                   | 2                     | 2                        | 0                                      | 0                                     | 0                                        | 1.75                   | 1                     | 1                        | 0                      | 0                     | 0                        |
| 6322063   | MET18     | 2.23                   | 2                     | 2                        | 0                                      | 0                                     | 0                                        | 1.74                   | 1                     | 1                        | 0                      | 0                     | 0                        |
| 6319901   | THR4      | 7.00                   | 3                     | 4                        | 0                                      | 0                                     | 0                                        | 3.70                   | 1                     | 1                        | 0                      | 0                     | 0                        |
| 6321899   | CDC12     | 11.79                  | 4                     | 4                        | 0                                      | 0                                     | 0                                        | 3.19                   | 1                     | 1                        | 0                      | 0                     | 0                        |
| 398364305 | YND1      | 1.27                   | 1                     | 9                        | 0                                      | 0                                     | 0                                        | 2.22                   | 1                     | 1                        | 0                      | 0                     | 0                        |
| 6325365   | RPN7      | 19.11                  | 9                     | 39                       | 0                                      | 0                                     | 0                                        | 2.10                   | 1                     | 1                        | 0                      | 0                     | 0                        |
| 6322288   | RFA3      | 53.28                  | 4                     | 74                       | 0                                      | 0                                     | 0                                        | 12.30                  | 1                     | 1                        | 0                      | 0                     | 0                        |
| 6323832   | YMR178    | 0                      | 0                     | 0                        | 0                                      | 0                                     | 0                                        | 6.20                   | 1                     | 1                        | 0                      | 0                     | 0                        |

Table S1 - Smith-Kinnaman, *et al* (2014) Abbreviations: %SC = percent sequence coverage, UP = unique peptides, PSM = peptide spectrum matches

| Accession | Acronym | %SC<br>FLAG_Rtr<br>1_1 | UP<br>FLAG_Rtr1<br>_1 | # PSM<br>FLAG_Rtr<br>1_1 | %SC<br>FLAG_Rtr1_<br>ctk1_deleti<br>on | UP<br>FLAG_Rtr<br>1_ctk1_d<br>eletion | # PSM<br>FLAG_Rtr<br>1_ctk1_d<br>eletion | %SC<br>FLAG_Rtr1<br>_2 | UP<br>FLAG_Rtr<br>1_2 | # PSM<br>FLAG_Rtr<br>1_2 | %SC<br>Rpb3_TA<br>P_WT | UP<br>Rpb3_TA<br>P_WT | # PSM<br>Rpb3_TA<br>P_WT |
|-----------|---------|------------------------|-----------------------|--------------------------|----------------------------------------|---------------------------------------|------------------------------------------|------------------------|-----------------------|--------------------------|------------------------|-----------------------|--------------------------|
| 6321327   | NSA1    | 0                      | 0                     | 0                        | 0                                      | 0                                     | 0                                        | 3.02                   | 1                     | 1                        | 0                      | 0                     | 0                        |
| 398366645 | PKH1    | 0                      | 0                     | 0                        | 0                                      | 0                                     | 0                                        | 2.09                   | 1                     | 1                        | 0                      | 0                     | 0                        |
| 6323507   | MSC1    | 0                      | 0                     | 0                        | 0                                      | 0                                     | 0                                        | 1.75                   | 1                     | 1                        | 0                      | 0                     | 0                        |
| 398366107 | YPP1    | 0                      | 0                     | 0                        | 0                                      | 0                                     | 0                                        | 1.22                   | 1                     | 1                        | 0                      | 0                     | 0                        |
| 6323586   | SPC2    | 0                      | 0                     | 0                        | 0                                      | 0                                     | 0                                        | 6.74                   | 1                     | 1                        | 0                      | 0                     | 0                        |
| 6324079   | RAD50   | 0                      | 0                     | 0                        | 0                                      | 0                                     | 0                                        | 0.91                   | 1                     | 1                        | 0                      | 0                     | 0                        |
| 6320865   | GAL83   | 0                      | 0                     | 0                        | 0                                      | 0                                     | 0                                        | 2.64                   | 1                     | 1                        | 0                      | 0                     | 0                        |
| 14318465  | YFL054C | 0                      | 0                     | 0                        | 0                                      | 0                                     | 0                                        | 2.17                   | 1                     | 1                        | 0                      | 0                     | 0                        |
| 6325349   | NVJ2    | 0                      | 0                     | 0                        | 0                                      | 0                                     | 0                                        | 2.21                   | 1                     | 1                        | 0                      | 0                     | 0                        |
| 6323962   | UBP15   | 0.98                   | 1                     | 1                        | 0.98                                   | 1                                     | 1                                        | 0.98                   | 1                     | 2                        | 0                      | 0                     | 0                        |
| 6323891   | RNA1    | 6.88                   | 2                     | 3                        | 3.19                                   | 1                                     | 1                                        | 7.86                   | 2                     | 2                        | 0                      | 0                     | 0                        |
| 6323273   | MAP1    | 9.30                   | 3                     | 4                        | 3.10                                   | 1                                     | 1                                        | 3.10                   | 1                     | 2                        | 0                      | 0                     | 0                        |
| 6320935   | TRP2    | 12.43                  | 5                     | 6                        | 1.97                                   | 1                                     | 1                                        | 6.71                   | 2                     | 2                        | 0                      | 0                     | 0                        |
| 6324994   | YPL260W | 2.54                   | 1                     | 1                        | 1.81                                   | 1                                     | 2                                        | 4.72                   | 2                     | 2                        | 0                      | 0                     | 0                        |
| 27469358  | PMT2    | 0                      | 0                     | 0                        | 3.03                                   | 2                                     | 11                                       | 1.58                   | 1                     | 2                        | 0                      | 0                     | 0                        |
| 398365969 | CDC31   | 8.70                   | 1                     | 1                        | 0                                      | 0                                     | 0                                        | 8.70                   | 1                     | 2                        | 0                      | 0                     | 0                        |
| 6320214   | SNQ2    | 1.87                   | 2                     | 4                        | 0                                      | 0                                     | 0                                        | 0.80                   | 1                     | 2                        | 0                      | 0                     | 0                        |
| 6322263   | PHO90   | 2.04                   | 2                     | 2                        | 1.70                                   | 1                                     | 1                                        | 2.95                   | 2                     | 3                        | 0                      | 0                     | 0                        |
| 42742305  | YNL208W | 0                      | 0                     | 0                        | 17.09                                  | 2                                     | 2                                        | 9.05                   | 1                     | 3                        | 0                      | 0                     | 0                        |
| 6321432   | PMC1    | 0                      | 0                     | 0                        | 2.13                                   | 2                                     | 4                                        | 2.81                   | 2                     | 3                        | 0                      | 0                     | 0                        |
| 6323221   | HCR1    | 8.30                   | 2                     | 4                        | 4.15                                   | 1                                     | 5                                        | 4.15                   | 1                     | 3                        | 0                      | 0                     | 0                        |
| 6322722   | PGM1    | 2.46                   | 1                     | 1                        | 0                                      | 0                                     | 0                                        | 2.28                   | 1                     | 3                        | 0                      | 0                     | 0                        |
| 6323089   | FRS1    | 4.71                   | 2                     | 2                        | 0                                      | 0                                     | 0                                        | 4.20                   | 2                     | 3                        | 0                      | 0                     | 0                        |
| 6321271   | PMR1    | 3.47                   | 3                     | 3                        | 0                                      | 0                                     | 0                                        | 3.37                   | 2                     | 3                        | 0                      | 0                     | 0                        |
| 6322097   | LYS12   | 20.49                  | 6                     | 35                       | 0                                      | 0                                     | 0                                        | 7.01                   | 2                     | 3                        | 0                      | 0                     | 0                        |
| 6320151   | SLC1    | 0                      | 0                     | 0                        | 0                                      | 0                                     | 0                                        | 5.94                   | 1                     | 3                        | 0                      | 0                     | 0                        |
| 6319312   | ERP2    | 0                      | 0                     | 0                        | 0                                      | 0                                     | 0                                        | 12.09                  | 1                     | 3                        | 0                      | 0                     | 0                        |
| 398365779 | YCF1    | 1.98                   | 2                     | 2                        | 0                                      | 0                                     | 0                                        | 2.05                   | 2                     | 4                        | 0                      | 0                     | 0                        |
| 6324082   | YNL247W | 3.91                   | 3                     | 3                        | 0                                      | 0                                     | 0                                        | 3.39                   | 2                     | 4                        | 0                      | 0                     | 0                        |
| 6324625   | ETT1    | 0                      | 0                     | 0                        | 0                                      | 0                                     | 0                                        | 2.91                   | 1                     | 4                        | 0                      | 0                     | 0                        |
| 6321492   | MUP1    | 0                      | 0                     | 0                        | 0                                      | 0                                     | 0                                        | 1.74                   | 1                     | 4                        | 0                      | 0                     | 0                        |
| 6322434   | RNR2    | 9.52                   | 4                     | 13                       | 2.76                                   | 1                                     | 7                                        | 7.02                   | 2                     | 5                        | 0                      | 0                     | 0                        |
| 6320245   | ENA1    | 1.01                   | 1                     | 2                        | 0                                      | 0                                     | 0                                        | 2.66                   | 2                     | 5                        | 0                      | 0                     | 0                        |
| 6323853   | VTI1    | 24.42                  | 4                     | 7                        | 0                                      | 0                                     | 0                                        | 14.75                  | 2                     | 5                        | 0                      | 0                     | 0                        |
| 6319837   | ILV6    | 5.18                   | 1                     | 6                        | 5.18                                   | 1                                     | 1                                        | 9.06                   | 2                     | 6                        | 0                      | 0                     | 0                        |
| 6319441   | PET9    | 3.46                   | 1                     | 1                        | 16.04                                  | 5                                     | 14                                       | 3.14                   | 1                     | 6                        | 0                      | 0                     | 0                        |
| 398365855 | KGD2    | 2.81                   | 1                     | 1                        | 6.26                                   | 2                                     | 5                                        | 10.58                  | 3                     | 7                        | 0                      | 0                     | 0                        |























Table S1 - Smith-Kinnaman, *et al* (2014) Abbreviations: %SC = percent sequence coverage, UP = unique peptides, PSM = peptide spectrum matches

| Accession | Acronym | %SC<br>FLAG_Rtr<br>1_1 | UP<br>FLAG_Rtr1<br>_1 | # PSM<br>FLAG_Rtr<br>1_1 | %SC<br>FLAG_Rtr1_<br>ctk1_deleti<br>on | UP<br>FLAG_Rtr<br>1_ctk1_d<br>eletion | # PSM<br>FLAG_Rtr<br>1_ctk1_d<br>eletion | %SC<br>FLAG_Rtr1<br>_2 | UP<br>FLAG_Rtr<br>1_2 | # PSM<br>FLAG_Rtr<br>1_2 | %SC<br>Rpb3_TA<br>P_WT | UP<br>Rpb3_TA<br>P_WT | # PSM<br>Rpb3_TA<br>P_WT |
|-----------|---------|------------------------|-----------------------|--------------------------|----------------------------------------|---------------------------------------|------------------------------------------|------------------------|-----------------------|--------------------------|------------------------|-----------------------|--------------------------|
| 6324988   | ACM1    | 0                      | 0                     | 0                        | 0                                      | 0                                     | 0                                        | 0                      | 0                     | 0                        | 0                      | 0                     | 0                        |
| 330443417 | RRN6    | 0                      | 0                     | 0                        | 0                                      | 0                                     | 0                                        | 0                      | 0                     | 0                        | 0                      | 0                     | 0                        |
| 6325398   | TAZ1    | 0                      | 0                     | 0                        | 0                                      | 0                                     | 0                                        | 0                      | 0                     | 0                        | 0                      | 0                     | 0                        |
| 6321828   | MSC7    | 0                      | 0                     | 0                        | 0                                      | 0                                     | 0                                        | 0                      | 0                     | 0                        | 0                      | 0                     | 0                        |
| 6323320   | GUF1    | 0                      | 0                     | 0                        | 0                                      | 0                                     | 0                                        | 0                      | 0                     | 0                        | 0                      | 0                     | 0                        |
| 16740526  | GYP8    | 0                      | 0                     | 0                        | 0                                      | 0                                     | 0                                        | 0                      | 0                     | 0                        | 0                      | 0                     | 0                        |
| 6324783   | NPT1    | 2.56                   | 1                     | 1                        | 2.56                                   | 1                                     | 1                                        | 3.96                   | 1                     | 1                        | 0                      | 0                     | 0                        |
| 6319974   | HOP     | 5.97                   | 2                     | 2                        | 2.73                                   | 1                                     | 1                                        | 2.73                   | 1                     | 1                        | 0                      | 0                     | 0                        |
| 6319931   | ABP1    | 15.20                  | 6                     | 18                       | 2.03                                   | 1                                     | 1                                        | 2.20                   | 1                     | 1                        | 0                      | 0                     | 0                        |
| 6321787   | OSH7    | 0                      | 0                     | 0                        | 1.83                                   | 1                                     | 1                                        | 1.83                   | 1                     | 1                        | 0                      | 0                     | 0                        |
| 6319512   | CHS2    | 0                      | 0                     | 0                        | 0.83                                   | 1                                     | 1                                        | 1.66                   | 1                     | 1                        | 0                      | 0                     | 0                        |
| 6324912   | KRE5    | 0                      | 0                     | 0                        | 0.88                                   | 1                                     | 1                                        | 0.73                   | 1                     | 1                        | 0                      | 0                     | 0                        |
| 398365337 | SFL1    | 0                      | 0                     | 0                        | 6.14                                   | 1                                     | 1                                        | 2.74                   | 1                     | 1                        | 0                      | 0                     | 0                        |
| 398364433 | CAJ1    | 7.16                   | 2                     | 10                       | 3.58                                   | 1                                     | 2                                        | 3.58                   | 1                     | 1                        | 0                      | 0                     | 0                        |
| 6322547   | EMC2    | 0                      | 0                     | 0                        | 3.77                                   | 1                                     | 2                                        | 6.16                   | 1                     | 1                        | 0                      | 0                     | 0                        |
| 6324225   | LEU4    | 3.55                   | 1                     | 1                        | 3.88                                   | 2                                     | 4                                        | 2.42                   | 1                     | 1                        | 0                      | 0                     | 0                        |
| 6322537   | MIR1    | 0                      | 0                     | 0                        | 3.86                                   | 1                                     | 4                                        | 3.86                   | 1                     | 1                        | 0                      | 0                     | 0                        |
| 6321795   | ERG11   | 0                      | 0                     | 0                        | 9.81                                   | 3                                     | 15                                       | 3.40                   | 1                     | 1                        | 0                      | 0                     | 0                        |
| 6323953   | YMR295C | 0                      | 0                     | 0                        | 15.74                                  | 1                                     | 28                                       | 12.18                  | 1                     | 1                        | 0                      | 0                     | 0                        |
| 398366013 | YDR186C | 1.94                   | 1                     | 1                        | 0                                      | 0                                     | 0                                        | 2.17                   | 1                     | 1                        | 0                      | 0                     | 0                        |
| 6323943   | DSS1    | 1.14                   | 1                     | 1                        | 0                                      | 0                                     | 0                                        | 1.14                   | 1                     | 1                        | 0                      | 0                     | 0                        |
| 6320851   | HEM14   | 1.48                   | 1                     | 1                        | 0                                      | 0                                     | 0                                        | 2.78                   | 1                     | 1                        | 0                      | 0                     | 0                        |
| 6322116   | SER33   | 2.35                   | 1                     | 1                        | 0                                      | 0                                     | 0                                        | 2.99                   | 1                     | 1                        | 0                      | 0                     | 0                        |
| 83578105  | TMA46   | 2.90                   | 1                     | 1                        | 0                                      | 0                                     | 0                                        | 3.19                   | 1                     | 1                        | 0                      | 0                     | 0                        |
| 6321960   | CDC23   | 2.08                   | 1                     | 1                        | 0                                      | 0                                     | 0                                        | 1.76                   | 1                     | 1                        | 0                      | 0                     | 0                        |
| 6320470   | AKR1    | 1.70                   | 1                     | 1                        | 0                                      | 0                                     | 0                                        | 3.40                   | 1                     | 1                        | 0                      | 0                     | 0                        |
| 398365797 | YNR048W | 3.05                   | 1                     | 1                        | 0                                      | 0                                     | 0                                        | 3.05                   | 1                     | 1                        | 0                      | 0                     | 0                        |
| 6322387   | SMC3    | 0.81                   | 1                     | 1                        | 0                                      | 0                                     | 0                                        | 1.22                   | 1                     | 1                        | 0                      | 0                     | 0                        |
| 6321806   | ARG4    | 1.94                   | 1                     | 1                        | 0                                      | 0                                     | 0                                        | 2.59                   | 1                     | 1                        | 0                      | 0                     | 0                        |
| 6324055   | GOR1    | 2.57                   | 1                     | 1                        | 0                                      | 0                                     | 0                                        | 3.43                   | 1                     | 1                        | 0                      | 0                     | 0                        |
| 6324554   | YOL019W | 2.18                   | 1                     | 1                        | 0                                      | 0                                     | 0                                        | 2.72                   | 1                     | 1                        | 0                      | 0                     | 0                        |
| 6324897   | PMT3    | 1.59                   | 1                     | 1                        | 0                                      | 0                                     | 0                                        | 1.73                   | 1                     | 1                        | 0                      | 0                     | 0                        |
| 6323553   | ALO1    | 1.90                   | 1                     | 1                        | 0                                      | 0                                     | 0                                        | 2.66                   | 1                     | 1                        | 0                      | 0                     | 0                        |
| 6323958   | ADE4    | 4.12                   | 2                     | 2                        | 0                                      | 0                                     | 0                                        | 2.35                   | 1                     | 1                        | 0                      | 0                     | 0                        |
| 6322585   | ENT3    | 2.70                   | 1                     | 2                        | 0                                      | 0                                     | 0                                        | 3.92                   | 1                     | 1                        | 0                      | 0                     | 0                        |
| 6322732   | SBA1    | 4.17                   | 1                     | 2                        | 0                                      | 0                                     | 0                                        | 4.17                   | 1                     | 1                        | 0                      | 0                     | 0                        |
| 6319767   | BSD2    | 11.53                  | 1                     | 2                        | 0                                      | 0                                     | 0                                        | 4.05                   | 1                     | 1                        | 0                      | 0                     | 0                        |



Table S1 - Smith-Kinnaman, *et al* (2014) Abbreviations: %SC = percent sequence coverage, UP = unique peptides, PSM = peptide spectrum matches

| Accession | Acronym | %SC<br>FLAG_Rtr<br>1_1 | UP<br>FLAG_Rtr1<br>_1 | # PSM<br>FLAG_Rtr<br>1_1 | %SC<br>FLAG_Rtr1_<br>ctk1_deleti<br>on | UP<br>FLAG_Rtr<br>1_ctk1_d<br>eletion | # PSM<br>FLAG_Rtr<br>1_ctk1_d<br>eletion | %SC<br>FLAG_Rtr1<br>_2 | UP<br>FLAG_Rtr<br>1_2 | # PSM<br>FLAG_Rtr<br>1_2 | %SC<br>Rpb3_TA<br>P_WT | UP<br>Rpb3_TA<br>P_WT | # PSM<br>Rpb3_TA<br>P_WT |
|-----------|---------|------------------------|-----------------------|--------------------------|----------------------------------------|---------------------------------------|------------------------------------------|------------------------|-----------------------|--------------------------|------------------------|-----------------------|--------------------------|
| 398365317 | GPT2    | 2.02                   | 1                     | 2                        | 0                                      | 0                                     | 0                                        | 2.02                   | 1                     | 1                        | 0                      | 0                     | 0                        |
| 82795241  | APE3    | 6.33                   | 2                     | 2                        | 0                                      | 0                                     | 0                                        | 4.10                   | 1                     | 1                        | 0                      | 0                     | 0                        |
| 398365865 | GIR2    | 5.28                   | 1                     | 2                        | 0                                      | 0                                     | 0                                        | 4.15                   | 1                     | 1                        | 0                      | 0                     | 0                        |
| 6322509   | UTR1    | 2.45                   | 1                     | 2                        | 0                                      | 0                                     | 0                                        | 2.45                   | 1                     | 1                        | 0                      | 0                     | 0                        |
| 6322500   | GEF1    | 3.21                   | 2                     | 2                        | 0                                      | 0                                     | 0                                        | 2.31                   | 1                     | 1                        | 0                      | 0                     | 0                        |
| 6320893   | HOM3    | 2.66                   | 1                     | 2                        | 0                                      | 0                                     | 0                                        | 2.09                   | 1                     | 1                        | 0                      | 0                     | 0                        |
| 82795247  | LSM6    | 34.88                  | 3                     | 3                        | 0                                      | 0                                     | 0                                        | 20.93                  | 1                     | 1                        | 0                      | 0                     | 0                        |
| 6320249   | HEM13   | 9.45                   | 3                     | 3                        | 0                                      | 0                                     | 0                                        | 6.10                   | 1                     | 1                        | 0                      | 0                     | 0                        |
| 6322287   | KRE9    | 3.99                   | 1                     | 3                        | 0                                      | 0                                     | 0                                        | 9.78                   | 1                     | 1                        | 0                      | 0                     | 0                        |
| 6324580   | SGT2    | 13.58                  | 4                     | 5                        | 0                                      | 0                                     | 0                                        | 4.05                   | 1                     | 1                        | 0                      | 0                     | 0                        |
| 6322870   | YKRO18C | 6.34                   | 4                     | 7                        | 0                                      | 0                                     | 0                                        | 2.07                   | 1                     | 1                        | 0                      | 0                     | 0                        |
| 14318569  | DUG1    | 8.94                   | 3                     | 14                       | 0                                      | 0                                     | 0                                        | 3.33                   | 1                     | 1                        | 0                      | 0                     | 0                        |
| 6319509   | PDX3    | 17.98                  | 3                     | 31                       | 0                                      | 0                                     | 0                                        | 5.26                   | 1                     | 1                        | 0                      | 0                     | 0                        |
| 6324697   | LEO1    | 19.83                  | 7                     | 50                       | 0                                      | 0                                     | 0                                        | 1.94                   | 1                     | 1                        | 0                      | 0                     | 0                        |
| 6319764   | YBR287W | 0                      | 0                     | 0                        | 0                                      | 0                                     | 0                                        | 6.09                   | 1                     | 1                        | 0                      | 0                     | 0                        |
| 6324484   | MPD2    | 0                      | 0                     | 0                        | 0                                      | 0                                     | 0                                        | 5.42                   | 1                     | 1                        | 0                      | 0                     | 0                        |
| 6323510   | PGA3    | 0                      | 0                     | 0                        | 0                                      | 0                                     | 0                                        | 4.49                   | 1                     | 1                        | 0                      | 0                     | 0                        |
| 6321646   | CIR1    | 0                      | 0                     | 0                        | 0                                      | 0                                     | 0                                        | 6.13                   | 1                     | 1                        | 0                      | 0                     | 0                        |
| 6324059   | ALP1    | 0                      | 0                     | 0                        | 0                                      | 0                                     | 0                                        | 2.44                   | 1                     | 1                        | 0                      | 0                     | 0                        |
| 6320516   | SUM1    | 0                      | 0                     | 0                        | 0                                      | 0                                     | 0                                        | 1.51                   | 1                     | 1                        | 0                      | 0                     | 0                        |
| 37362655  | COG2    | 0                      | 0                     | 0                        | 0                                      | 0                                     | 0                                        | 2.67                   | 1                     | 1                        | 0                      | 0                     | 0                        |
| 398366091 | ART10   | 0                      | 0                     | 0                        | 0                                      | 0                                     | 0                                        | 2.32                   | 1                     | 1                        | 0                      | 0                     | 0                        |
| 6320327   | KIN1    | 0                      | 0                     | 0                        | 0                                      | 0                                     | 0                                        | 1.60                   | 1                     | 1                        | 0                      | 0                     | 0                        |
| 6324609   | SHE4    | 0                      | 0                     | 0                        | 0                                      | 0                                     | 0                                        | 1.39                   | 1                     | 1                        | 0                      | 0                     | 0                        |
| 6324132   | WHI3    | 0                      | 0                     | 0                        | 0                                      | 0                                     | 0                                        | 2.42                   | 1                     | 1                        | 0                      | 0                     | 0                        |
| 6322550   | JSN1    | 0                      | 0                     | 0                        | 0                                      | 0                                     | 0                                        | 1.65                   | 1                     | 1                        | 0                      | 0                     | 0                        |
| 6320107   | PMT1    | 0                      | 0                     | 0                        | 0                                      | 0                                     | 0                                        | 1.59                   | 1                     | 1                        | 0                      | 0                     | 0                        |
| 6319413   | SHP1    | 0                      | 0                     | 0                        | 0                                      | 0                                     | 0                                        | 4.02                   | 1                     | 1                        | 0                      | 0                     | 0                        |
| 6321756   | GOS1    | 0                      | 0                     | 0                        | 0                                      | 0                                     | 0                                        | 11.66                  | 1                     | 1                        | 0                      | 0                     | 0                        |
| 6321337   | YGL101W | 0                      | 0                     | 0                        | 0                                      | 0                                     | 0                                        | 5.12                   | 1                     | 1                        | 0                      | 0                     | 0                        |
| 6325199   | PDR12   | 0                      | 0                     | 0                        | 0                                      | 0                                     | 0                                        | 0.99                   | 1                     | 1                        | 0                      | 0                     | 0                        |
| 6322782   | NUP100  | 0                      | 0                     | 0                        | 0                                      | 0                                     | 0                                        | 1.25                   | 1                     | 1                        | 0                      | 0                     | 0                        |
| 6324859   | RDL1    | 0                      | 0                     | 0                        | 0                                      | 0                                     | 0                                        | 10.79                  | 1                     | 1                        | 0                      | 0                     | 0                        |
| 6323899   | ZRC1    | 0                      | 0                     | 0                        | 0                                      | 0                                     | 0                                        | 3.85                   | 1                     | 1                        | 0                      | 0                     | 0                        |
| 6319392   | NUP170  | 0                      | 0                     | 0                        | 0                                      | 0                                     | 0                                        | 1.33                   | 1                     | 1                        | 0                      | 0                     | 0                        |
| 398365585 | PCS60   | 0                      | 0                     | 0                        | 0                                      | 0                                     | 0                                        | 3.31                   | 1                     | 1                        | 0                      | 0                     | 0                        |
| 6322186   | EPS1    | 0                      | 0                     | 0                        | 0                                      | 0                                     | 0                                        | 2.57                   | 1                     | 1                        | 0                      | 0                     | 0                        |

Table S1 - Smith-Kinnaman, *et al* (2014) Abbreviations: %SC = percent sequence coverage, UP = unique peptides, PSM = peptide spectrum matches

| Accession | Acronym | %SC<br>FLAG_Rtr<br>1_1 | UP<br>FLAG_Rtr1<br>_1 | # PSM<br>FLAG_Rtr<br>1_1 | %SC<br>FLAG_Rtr1_<br>ctk1_deleti<br>on | UP<br>FLAG_Rtr<br>1_ctk1_d<br>eletion | # PSM<br>FLAG_Rtr<br>1_ctk1_d<br>eletion | %SC<br>FLAG_Rtr1<br>_2 | UP<br>FLAG_Rtr<br>1_2 | # PSM<br>FLAG_Rtr<br>1_2 | %SC<br>Rpb3_TA<br>P_WT | UP<br>Rpb3_TA<br>P_WT | # PSM<br>Rpb3_TA<br>P_WT |
|-----------|---------|------------------------|-----------------------|--------------------------|----------------------------------------|---------------------------------------|------------------------------------------|------------------------|-----------------------|--------------------------|------------------------|-----------------------|--------------------------|
| 398366407 | YOR1    | 0                      | 0                     | 0                        | 0                                      | 0                                     | 0                                        | 0.95                   | 1                     | 1                        | 0                      | 0                     | 0                        |
| 37362695  | OST2    | 0                      | 0                     | 0                        | 0                                      | 0                                     | 0                                        | 13.08                  | 1                     | 1                        | 0                      | 0                     | 0                        |
| 6324353   | SEC12   | 0                      | 0                     | 0                        | 0                                      | 0                                     | 0                                        | 2.12                   | 1                     | 1                        | 0                      | 0                     | 0                        |
| 330443368 | FLC2    | 0                      | 0                     | 0                        | 0                                      | 0                                     | 0                                        | 2.17                   | 1                     | 1                        | 0                      | 0                     | 0                        |
| 398365223 | MSP1    | 0                      | 0                     | 0                        | 0                                      | 0                                     | 0                                        | 3.87                   | 1                     | 1                        | 0                      | 0                     | 0                        |
| 6321449   | YGR012W | 0                      | 0                     | 0                        | 0                                      | 0                                     | 0                                        | 3.56                   | 1                     | 1                        | 0                      | 0                     | 0                        |
| 6322310   | SNA3    | 0                      | 0                     | 0                        | 0                                      | 0                                     | 0                                        | 24.81                  | 1                     | 1                        | 0                      | 0                     | 0                        |
| 6323413   | CTF3    | 0                      | 0                     | 0                        | 0                                      | 0                                     | 0                                        | 1.23                   | 1                     | 1                        | 0                      | 0                     | 0                        |
| 6321225   | SKI8    | 0                      | 0                     | 0                        | 0                                      | 0                                     | 0                                        | 2.02                   | 1                     | 1                        | 0                      | 0                     | 0                        |
| 6325101   | PRM4    | 0                      | 0                     | 0                        | 0                                      | 0                                     | 0                                        | 5.28                   | 1                     | 1                        | 0                      | 0                     | 0                        |
| 6321345   | SPC105  | 0                      | 0                     | 0                        | 0                                      | 0                                     | 0                                        | 1.64                   | 1                     | 1                        | 0                      | 0                     | 0                        |
| 398366519 | EAF1    | 0                      | 0                     | 0                        | 0                                      | 0                                     | 0                                        | 1.43                   | 1                     | 1                        | 0                      | 0                     | 0                        |
| 398365305 | PAM17   | 0                      | 0                     | 0                        | 0                                      | 0                                     | 0                                        | 9.64                   | 1                     | 1                        | 0                      | 0                     | 0                        |
| 6319334   | PRM9    | 0                      | 0                     | 0                        | 0                                      | 0                                     | 0                                        | 4.70                   | 1                     | 1                        | 0                      | 0                     | 0                        |
| 83722565  | PTM1    | 0                      | 0                     | 0                        | 0                                      | 0                                     | 0                                        | 1.91                   | 1                     | 1                        | 0                      | 0                     | 0                        |
| 6322825   | TCD2    | 0                      | 0                     | 0                        | 0                                      | 0                                     | 0                                        | 3.58                   | 1                     | 1                        | 0                      | 0                     | 0                        |
| 6323936   | CAT8    | 0                      | 0                     | 0                        | 0                                      | 0                                     | 0                                        | 1.05                   | 1                     | 1                        | 0                      | 0                     | 0                        |
| 6324567   | CSI2    | 0                      | 0                     | 0                        | 0                                      | 0                                     | 0                                        | 5.28                   | 1                     | 1                        | 0                      | 0                     | 0                        |
| 6319516   | CST26   | 0                      | 0                     | 0                        | 0                                      | 0                                     | 0                                        | 4.28                   | 1                     | 1                        | 0                      | 0                     | 0                        |
| 6321275   | RAD54   | 0                      | 0                     | 0                        | 0                                      | 0                                     | 0                                        | 1.56                   | 1                     | 1                        | 0                      | 0                     | 0                        |
| 398366375 | DON1    | 0                      | 0                     | 0                        | 0                                      | 0                                     | 0                                        | 4.11                   | 1                     | 1                        | 0                      | 0                     | 0                        |
| 398365229 | EAF6    | 0                      | 0                     | 0                        | 0                                      | 0                                     | 0                                        | 10.62                  | 1                     | 1                        | 0                      | 0                     | 0                        |
| 398365911 | ESA1    | 0                      | 0                     | 0                        | 0                                      | 0                                     | 0                                        | 2.47                   | 1                     | 1                        | 0                      | 0                     | 0                        |
| 6323375   | GAS2    | 0                      | 0                     | 0                        | 0                                      | 0                                     | 0                                        | 1.44                   | 1                     | 1                        | 0                      | 0                     | 0                        |
| 398366357 | GDS1    | 0                      | 0                     | 0                        | 0                                      | 0                                     | 0                                        | 2.87                   | 1                     | 1                        | 0                      | 0                     | 0                        |
| 330443484 | YCL002C | 0                      | 0                     | 0                        | 0                                      | 0                                     | 0                                        | 6.08                   | 1                     | 1                        | 0                      | 0                     | 0                        |
| 6321588   | YGR149W | 0                      | 0                     | 0                        | 0                                      | 0                                     | 0                                        | 3.01                   | 1                     | 1                        | 0                      | 0                     | 0                        |
| 37362691  | ITR2    | 0                      | 0                     | 0                        | 0                                      | 0                                     | 0                                        | 2.13                   | 1                     | 1                        | 0                      | 0                     | 0                        |
| 398364419 | MRF1    | 0                      | 0                     | 0                        | 0                                      | 0                                     | 0                                        | 3.15                   | 1                     | 1                        | 0                      | 0                     | 0                        |
| 6324909   | MRS2    | 0                      | 0                     | 0                        | 0                                      | 0                                     | 0                                        | 3.40                   | 1                     | 1                        | 0                      | 0                     | 0                        |
| 398364395 | PEX14   | 0                      | 0                     | 0                        | 0                                      | 0                                     | 0                                        | 4.69                   | 1                     | 1                        | 0                      | 0                     | 0                        |
| 14318528  | YFR006W | 0                      | 0                     | 0                        | 0                                      | 0                                     | 0                                        | 3.36                   | 1                     | 1                        | 0                      | 0                     | 0                        |
| 6321021   | RAD24   | 0                      | 0                     | 0                        | 0                                      | 0                                     | 0                                        | 2.58                   | 1                     | 1                        | 0                      | 0                     | 0                        |
| 6319451   | RFT1    | 0                      | 0                     | 0                        | 0                                      | 0                                     | 0                                        | 2.09                   | 1                     | 1                        | 0                      | 0                     | 0                        |
| 398365357 | RRG1    | 0                      | 0                     | 0                        | 0                                      | 0                                     | 0                                        | 2.74                   | 1                     | 1                        | 0                      | 0                     | 0                        |
| 14318556  | RRT5    | 0                      | 0                     | 0                        | 0                                      | 0                                     | 0                                        | 3.81                   | 1                     | 1                        | 0                      | 0                     | 0                        |
| 6321943   | SKG6    | 0                      | 0                     | 0                        | 0                                      | 0                                     | 0                                        | 1.77                   | 1                     | 1                        | 0                      | 0                     | 0                        |

Table S1 - Smith-Kinnaman, *et al* (2014) Abbreviations: %SC = percent sequence coverage, UP = unique peptides, PSM = peptide spectrum matches

| Accession | Acronym | %SC<br>FLAG_Rtr<br>1_1 | UP<br>FLAG_Rtr1<br>_1 | # PSM<br>FLAG_Rtr<br>1_1 | %SC<br>FLAG_Rtr1_<br>ctk1_deleti<br>on | UP<br>FLAG_Rtr<br>1_ctk1_d<br>eletion | # PSM<br>FLAG_Rtr<br>1_ctk1_d<br>eletion | %SC<br>FLAG_Rtr1<br>_2 | UP<br>FLAG_Rtr<br>1_2 | # PSM<br>FLAG_Rtr<br>1_2 | %SC<br>Rpb3_TA<br>P_WT | UP<br>Rpb3_TA<br>P_WT | # PSM<br>Rpb3_TA<br>P_WT |
|-----------|---------|------------------------|-----------------------|--------------------------|----------------------------------------|---------------------------------------|------------------------------------------|------------------------|-----------------------|--------------------------|------------------------|-----------------------|--------------------------|
| 398365903 | SSP2    | 0                      | 0                     | 0                        | 0                                      | 0                                     | 0                                        | 2.70                   | 1                     | 1                        | 0                      | 0                     | 0                        |
| 398366103 | CST9    | 0                      | 0                     | 0                        | 0                                      | 0                                     | 0                                        | 1.66                   | 1                     | 1                        | 0                      | 0                     | 0                        |
| 398364315 | TOS3    | 0                      | 0                     | 0                        | 0                                      | 0                                     | 0                                        | 2.50                   | 1                     | 1                        | 0                      | 0                     | 0                        |
| 6321577   | TPO2    | 0                      | 0                     | 0                        | 0                                      | 0                                     | 0                                        | 3.75                   | 1                     | 1                        | 0                      | 0                     | 0                        |
| 6320230   | VPS54   | 0                      | 0                     | 0                        | 0                                      | 0                                     | 0                                        | 1.80                   | 1                     | 1                        | 0                      | 0                     | 0                        |
| 6321759   | WSC4    | 0                      | 0                     | 0                        | 0                                      | 0                                     | 0                                        | 2.81                   | 1                     | 1                        | 0                      | 0                     | 0                        |
| 6322315   | IDS2    | 0                      | 0                     | 0                        | 0                                      | 0                                     | 0                                        | 2.13                   | 1                     | 1                        | 0                      | 0                     | 0                        |
| 6319635   | IFA38   | 0                      | 0                     | 0                        | 0                                      | 0                                     | 0                                        | 3.17                   | 1                     | 1                        | 0                      | 0                     | 0                        |
| 6323014   | BPT1    | 0                      | 0                     | 0                        | 0                                      | 0                                     | 0                                        | 1.15                   | 1                     | 1                        | 0                      | 0                     | 0                        |
| 6323657   | ERG5    | 0                      | 0                     | 0                        | 0                                      | 0                                     | 0                                        | 2.79                   | 1                     | 1                        | 0                      | 0                     | 0                        |
| 6323920   | CUE1    | 7.39                   | 1                     | 1                        | 7.39                                   | 1                                     | 1                                        | 7.39                   | 1                     | 2                        | 0                      | 0                     | 0                        |
| 86558908  | CBR1    | 2.82                   | 1                     | 1                        | 3.87                                   | 1                                     | 1                                        | 3.87                   | 1                     | 2                        | 0                      | 0                     | 0                        |
| 6323859   | TOM40   | 0                      | 0                     | 0                        | 4.13                                   | 1                                     | 1                                        | 4.13                   | 1                     | 2                        | 0                      | 0                     | 0                        |
| 398364295 | WBP1    | 0                      | 0                     | 0                        | 2.56                                   | 1                                     | 1                                        | 6.74                   | 2                     | 2                        | 0                      | 0                     | 0                        |
| 6322066   | KGD1    | 0.99                   | 1                     | 1                        | 2.37                                   | 2                                     | 2                                        | 2.47                   | 2                     | 2                        | 0                      | 0                     | 0                        |
| 6323593   | GSF2    | 0                      | 0                     | 0                        | 6.95                                   | 2                                     | 3                                        | 7.94                   | 2                     | 2                        | 0                      | 0                     | 0                        |
| 6322127   | ARC15   | 32.47                  | 3                     | 12                       | 6.49                                   | 1                                     | 4                                        | 6.49                   | 1                     | 2                        | 0                      | 0                     | 0                        |
| 10383789  | NPP1    | 1.62                   | 1                     | 1                        | 0                                      | 0                                     | 0                                        | 1.75                   | 1                     | 2                        | 0                      | 0                     | 0                        |
| 6319477   | RCR1    | 7.04                   | 1                     | 1                        | 0                                      | 0                                     | 0                                        | 6.10                   | 1                     | 2                        | 0                      | 0                     | 0                        |
| 398366155 | AHA1    | 8.86                   | 2                     | 2                        | 0                                      | 0                                     | 0                                        | 5.14                   | 1                     | 2                        | 0                      | 0                     | 0                        |
| 398365557 | VPS27   | 4.18                   | 2                     | 3                        | 0                                      | 0                                     | 0                                        | 2.25                   | 1                     | 2                        | 0                      | 0                     | 0                        |
| 6320054   | RPN5    | 4.04                   | 2                     | 3                        | 0                                      | 0                                     | 0                                        | 4.27                   | 1                     | 2                        | 0                      | 0                     | 0                        |
| 398365953 | SUP35   | 5.84                   | 3                     | 3                        | 0                                      | 0                                     | 0                                        | 4.96                   | 2                     | 2                        | 0                      | 0                     | 0                        |
| 37362677  | AAT2    | 9.33                   | 3                     | 4                        | 0                                      | 0                                     | 0                                        | 3.11                   | 1                     | 2                        | 0                      | 0                     | 0                        |
| 6324511   | PRS5    | 11.29                  | 4                     | 4                        | 0                                      | 0                                     | 0                                        | 3.63                   | 1                     | 2                        | 0                      | 0                     | 0                        |
| 6324463   | ZEO1    | 24.78                  | 3                     | 6                        | 0                                      | 0                                     | 0                                        | 29.20                  | 2                     | 2                        | 0                      | 0                     | 0                        |
| 6322338   | MTC1    | 4.60                   | 2                     | 14                       | 0                                      | 0                                     | 0                                        | 2.30                   | 1                     | 2                        | 0                      | 0                     | 0                        |
| 6324198   | TOM22   | 0                      | 0                     | 0                        | 0                                      | 0                                     | 0                                        | 11.18                  | 1                     | 2                        | 0                      | 0                     | 0                        |
| 330443603 | YJL171C | 0                      | 0                     | 0                        | 0                                      | 0                                     | 0                                        | 4.29                   | 1                     | 2                        | 0                      | 0                     | 0                        |
| 6322173   | SNL1    | 0                      | 0                     | 0                        | 0                                      | 0                                     | 0                                        | 10.69                  | 1                     | 2                        | 0                      | 0                     | 0                        |
| 6323876   | ERG8    | 0                      | 0                     | 0                        | 0                                      | 0                                     | 0                                        | 6.87                   | 2                     | 2                        | 0                      | 0                     | 0                        |
| 6321817   | DAP2    | 0                      | 0                     | 0                        | 0                                      | 0                                     | 0                                        | 1.83                   | 1                     | 2                        | 0                      | 0                     | 0                        |
| 6324071   | DSL1    | 0                      | 0                     | 0                        | 0                                      | 0                                     | 0                                        | 1.99                   | 1                     | 2                        | 0                      | 0                     | 0                        |
| 6325204   | KTR6    | 0                      | 0                     | 0                        | 0                                      | 0                                     | 0                                        | 6.73                   | 2                     | 2                        | 0                      | 0                     | 0                        |
| 398365745 | MTC4    | 0                      | 0                     | 0                        | 0                                      | 0                                     | 0                                        | 3.60                   | 1                     | 2                        | 0                      | 0                     | 0                        |
| 398366001 | PNT1    | 0                      | 0                     | 0                        | 0                                      | 0                                     | 0                                        | 3.07                   | 1                     | 2                        | 0                      | 0                     | 0                        |
| 6320424   | SPR28   | 0                      | 0                     | 0                        | 0                                      | 0                                     | 0                                        | 2.60                   | 1                     | 2                        | 0                      | 0                     | 0                        |

Table S1 - Smith-Kinnaman, *et al* (2014) Abbreviations: %SC = percent sequence coverage, UP = unique peptides, PSM = peptide spectrum matches

| Accession | Acronym | %SC<br>FLAG_Rtr<br>1_1 | UP<br>FLAG_Rtr1<br>_1 | # PSM<br>FLAG_Rtr<br>1_1 | %SC<br>FLAG_Rtr1_<br>ctk1_deleti<br>on | UP<br>FLAG_Rtr<br>1_ctk1_d<br>eletion | # PSM<br>FLAG_Rtr<br>1_ctk1_d<br>eletion | %SC<br>FLAG_Rtr1<br>_2 | UP<br>FLAG_Rtr<br>1_2 | # PSM<br>FLAG_Rtr<br>1_2 | %SC<br>Rpb3_TA<br>P_WT | UP<br>Rpb3_TA<br>P_WT | # PSM<br>Rpb3_TA<br>P_WT |
|-----------|---------|------------------------|-----------------------|--------------------------|----------------------------------------|---------------------------------------|------------------------------------------|------------------------|-----------------------|--------------------------|------------------------|-----------------------|--------------------------|
| 6321400   | OCH1    | 0                      | 0                     | 0                        | 0                                      | 0                                     | 0                                        | 3.75                   | 1                     | 2                        | 0                      | 0                     | 0                        |
| 6321416   | STT3    | 0                      | 0                     | 0                        | 0                                      | 0                                     | 0                                        | 1.95                   | 1                     | 2                        | 0                      | 0                     | 0                        |
| 6321206   | EMC4    | 0                      | 0                     | 0                        | 0                                      | 0                                     | 0                                        | 11.05                  | 1                     | 2                        | 0                      | 0                     | 0                        |
| 6320071   | LYS21   | 22.50                  | 7                     | 15                       | 2.27                                   | 1                                     | 1                                        | 5.45                   | 2                     | 3                        | 0                      | 0                     | 0                        |
| 330443405 | CDC27   | 0                      | 0                     | 0                        | 1.45                                   | 1                                     | 1                                        | 1.72                   | 1                     | 3                        | 0                      | 0                     | 0                        |
| 14318471  | EMP47   | 0                      | 0                     | 0                        | 2.70                                   | 1                                     | 1                                        | 5.39                   | 2                     | 3                        | 0                      | 0                     | 0                        |
| 6322765   | MDH1    | 9.88                   | 2                     | 2                        | 4.19                                   | 1                                     | 2                                        | 4.19                   | 1                     | 3                        | 0                      | 0                     | 0                        |
| 6322421   | NUP192  | 0                      | 0                     | 0                        | 1.01                                   | 1                                     | 2                                        | 0.77                   | 1                     | 3                        | 0                      | 0                     | 0                        |
| 6323619   | APT1    | 5.35                   | 1                     | 1                        | 0                                      | 0                                     | 0                                        | 5.35                   | 1                     | 3                        | 0                      | 0                     | 0                        |
| 6321355   | SCY1    | 1.37                   | 1                     | 1                        | 0                                      | 0                                     | 0                                        | 4.10                   | 3                     | 3                        | 0                      | 0                     | 0                        |
| 6324610   | PEP12   | 32.64                  | 7                     | 16                       | 0                                      | 0                                     | 0                                        | 4.86                   | 1                     | 3                        | 0                      | 0                     | 0                        |
| 6320019   | LYS20   | 29.44                  | 9                     | 17                       | 0                                      | 0                                     | 0                                        | 5.61                   | 2                     | 3                        | 0                      | 0                     | 0                        |
| 6323056   | ADE16   | 9.98                   | 5                     | 30                       | 0                                      | 0                                     | 0                                        | 2.54                   | 1                     | 3                        | 0                      | 0                     | 0                        |
| 6321748   | EFM1    | 0                      | 0                     | 0                        | 0                                      | 0                                     | 0                                        | 2.56                   | 1                     | 3                        | 0                      | 0                     | 0                        |
| 6324110   | ALG9    | 0                      | 0                     | 0                        | 0                                      | 0                                     | 0                                        | 3.42                   | 1                     | 3                        | 0                      | 0                     | 0                        |
| 6319869   | HSP30   | 0                      | 0                     | 0                        | 0                                      | 0                                     | 0                                        | 6.63                   | 1                     | 3                        | 0                      | 0                     | 0                        |
| 6325200   | SUR1    | 0                      | 0                     | 0                        | 0                                      | 0                                     | 0                                        | 4.19                   | 1                     | 3                        | 0                      | 0                     | 0                        |
| 6320451   | MNN10   | 0                      | 0                     | 0                        | 0                                      | 0                                     | 0                                        | 5.85                   | 2                     | 3                        | 0                      | 0                     | 0                        |
| 6319914   | CPR4    | 0                      | 0                     | 0                        | 0                                      | 0                                     | 0                                        | 4.72                   | 1                     | 3                        | 0                      | 0                     | 0                        |
| 6323998   | AAD14   | 0                      | 0                     | 0                        | 0                                      | 0                                     | 0                                        | 4.52                   | 1                     | 3                        | 0                      | 0                     | 0                        |
| 6323509   | ERG13   | 8.96                   | 4                     | 31                       | 3.26                                   | 1                                     | 1                                        | 6.52                   | 2                     | 4                        | 0                      | 0                     | 0                        |
| 6320560   | TRR1    | 21.32                  | 4                     | 9                        | 4.70                                   | 1                                     | 3                                        | 4.70                   | 1                     | 4                        | 0                      | 0                     | 0                        |
| 398364773 | TOM70   | 1.94                   | 1                     | 1                        | 0                                      | 0                                     | 0                                        | 4.21                   | 2                     | 4                        | 0                      | 0                     | 0                        |
| 6319497   | CHS3    | 0.77                   | 1                     | 1                        | 0                                      | 0                                     | 0                                        | 6.01                   | 3                     | 4                        | 0                      | 0                     | 0                        |
| 398365065 | DID2    | 3.92                   | 1                     | 2                        | 0                                      | 0                                     | 0                                        | 6.86                   | 1                     | 4                        | 0                      | 0                     | 0                        |
| 330443526 | ALD5    | 17.12                  | 7                     | 8                        | 0                                      | 0                                     | 0                                        | 5.19                   | 2                     | 4                        | 0                      | 0                     | 0                        |
| 6319421   | SEC17   | 19.52                  | 4                     | 11                       | 0                                      | 0                                     | 0                                        | 9.59                   | 2                     | 4                        | 0                      | 0                     | 0                        |
| 398366327 | VMA6    | 14.78                  | 4                     | 24                       | 0                                      | 0                                     | 0                                        | 5.51                   | 1                     | 4                        | 0                      | 0                     | 0                        |
| 6325220   | EGD1    | 0                      | 0                     | 0                        | 0                                      | 0                                     | 0                                        | 12.10                  | 1                     | 4                        | 0                      | 0                     | 0                        |
| 6324160   | PSD1    | 0                      | 0                     | 0                        | 0                                      | 0                                     | 0                                        | 7.00                   | 2                     | 4                        | 0                      | 0                     | 0                        |
| 398364599 | BAP2    | 0                      | 0                     | 0                        | 0                                      | 0                                     | 0                                        | 3.45                   | 1                     | 4                        | 0                      | 0                     | 0                        |
| 6325035   | FLC1    | 0                      | 0                     | 0                        | 0                                      | 0                                     | 0                                        | 1.89                   | 1                     | 4                        | 0                      | 0                     | 0                        |
| 6322683   | MCD4    | 0                      | 0                     | 0                        | 0                                      | 0                                     | 0                                        | 1.31                   | 1                     | 4                        | 0                      | 0                     | 0                        |
| 6321502   | VHT1    | 0                      | 0                     | 0                        | 0                                      | 0                                     | 0                                        | 4.38                   | 2                     | 4                        | 0                      | 0                     | 0                        |
| 6321437   | ERG26   | 0                      | 0                     | 0                        | 0                                      | 0                                     | 0                                        | 4.87                   | 1                     | 4                        | 0                      | 0                     | 0                        |
| 6320793   | GDA1    | 11.00                  | 4                     | 5                        | 1.93                                   | 1                                     | 1                                        | 5.79                   | 2                     | 5                        | 0                      | 0                     | 0                        |
| 398365875 | SKN1    | 1.95                   | 1                     | 8                        | 1.82                                   | 1                                     | 1                                        | 1.95                   | 1                     | 5                        | 0                      | 0                     | 0                        |

Table S1 - Smith-Kinnaman, *et al* (2014) Abbreviations: %SC = percent sequence coverage, UP = unique peptides, PSM = peptide spectrum matches

| Accession | Acronym | %SC<br>FLAG_Rtr<br>1_1 | UP<br>FLAG_Rtr1<br>_1 | # PSM<br>FLAG_Rtr<br>1_1 | %SC<br>FLAG_Rtr1_<br>ctk1_deleti<br>on | UP<br>FLAG_Rtr<br>1_ctk1_d<br>eletion | # PSM<br>FLAG_Rtr<br>1_ctk1_d<br>eletion | %SC<br>FLAG_Rtr1<br>_2 | UP<br>FLAG_Rtr<br>1_2 | # PSM<br>FLAG_Rtr<br>1_2 | %SC<br>Rpb3_TA<br>P_WT | UP<br>Rpb3_TA<br>P_WT | # PSM<br>Rpb3_TA<br>P_WT |
|-----------|---------|------------------------|-----------------------|--------------------------|----------------------------------------|---------------------------------------|------------------------------------------|------------------------|-----------------------|--------------------------|------------------------|-----------------------|--------------------------|
| 398364717 | OLE1    | 0                      | 0                     | 0                        | 2.35                                   | 1                                     | 1                                        | 8.63                   | 3                     | 5                        | 0                      | 0                     | 0                        |
| 398364715 | OST1    | 0                      | 0                     | 0                        | 2.94                                   | 1                                     | 2                                        | 6.30                   | 2                     | 5                        | 0                      | 0                     | 0                        |
| 6320639   | CYM1    | 0.81                   | 1                     | 1                        | 0                                      | 0                                     | 0                                        | 1.01                   | 1                     | 5                        | 0                      | 0                     | 0                        |
| 6324109   | ADE12   | 3.70                   | 2                     | 2                        | 0                                      | 0                                     | 0                                        | 4.39                   | 2                     | 5                        | 0                      | 0                     | 0                        |
| 330443698 | CHS1    | 2.12                   | 2                     | 2                        | 0                                      | 0                                     | 0                                        | 2.65                   | 2                     | 5                        | 0                      | 0                     | 0                        |
| 398365123 | AQR1    | 2.56                   | 1                     | 2                        | 0                                      | 0                                     | 0                                        | 4.61                   | 3                     | 5                        | 0                      | 0                     | 0                        |
| 6324745   | LCB4    | 4.81                   | 2                     | 2                        | 0                                      | 0                                     | 0                                        | 5.29                   | 2                     | 5                        | 0                      | 0                     | 0                        |
| 398366587 | RPN9    | 11.20                  | 5                     | 5                        | 0                                      | 0                                     | 0                                        | 3.82                   | 1                     | 5                        | 0                      | 0                     | 0                        |
| 6320837   | MNN1    | 0                      | 0                     | 0                        | 0                                      | 0                                     | 0                                        | 3.54                   | 2                     | 5                        | 0                      | 0                     | 0                        |
| 6324594   | HSP10   | 19.81                  | 2                     | 4                        | 10.38                                  | 1                                     | 2                                        | 10.38                  | 1                     | 6                        | 0                      | 0                     | 0                        |
| 6320859   | RPN3    | 13.00                  | 5                     | 9                        | 5.16                                   | 2                                     | 3                                        | 5.16                   | 2                     | 6                        | 0                      | 0                     | 0                        |
| 398366611 | NHX1    | 3.16                   | 1                     | 1                        | 0                                      | 0                                     | 0                                        | 4.58                   | 1                     | 6                        | 0                      | 0                     | 0                        |
| 6320395   | SLY1    | 2.85                   | 2                     | 2                        | 0                                      | 0                                     | 0                                        | 6.91                   | 3                     | 6                        | 0                      | 0                     | 0                        |
| 41629692  | YIP4    | 8.51                   | 2                     | 4                        | 0                                      | 0                                     | 0                                        | 20.43                  | 2                     | 6                        | 0                      | 0                     | 0                        |
| 330443374 | DRS2    | 3.62                   | 4                     | 7                        | 0                                      | 0                                     | 0                                        | 1.99                   | 2                     | 6                        | 0                      | 0                     | 0                        |
| 6325207   | MNN9    | 0                      | 0                     | 0                        | 0                                      | 0                                     | 0                                        | 2.78                   | 1                     | 6                        | 0                      | 0                     | 0                        |
| 6323858   | ERG20   | 0                      | 0                     | 0                        | 0                                      | 0                                     | 0                                        | 6.31                   | 1                     | 6                        | 0                      | 0                     | 0                        |
| 6319489   | MNN2    | 8.38                   | 3                     | 3                        | 2.35                                   | 1                                     | 1                                        | 4.02                   | 2                     | 7                        | 0                      | 0                     | 0                        |
| 6319726   | ARO4    | 10.27                  | 3                     | 12                       | 4.32                                   | 1                                     | 1                                        | 4.32                   | 1                     | 7                        | 0                      | 0                     | 0                        |
| 398364279 | VAC8    | 1.90                   | 1                     | 1                        | 9.17                                   | 4                                     | 8                                        | 2.42                   | 1                     | 7                        | 0                      | 0                     | 0                        |
| 6324555   | TLG2    | 13.35                  | 4                     | 9                        | 0                                      | 0                                     | 0                                        | 13.85                  | 4                     | 7                        | 0                      | 0                     | 0                        |
| 398366239 | GNT1    | 1.22                   | 1                     | 19                       | 0                                      | 0                                     | 0                                        | 5.09                   | 2                     | 7                        | 0                      | 0                     | 0                        |
| 6322249   | OPT1    | 0                      | 0                     | 0                        | 0                                      | 0                                     | 0                                        | 3.38                   | 2                     | 7                        | 0                      | 0                     | 0                        |
| 6319454   | PEP1    | 14.06                  | 18                    | 90                       | 2.03                                   | 2                                     | 2                                        | 1.71                   | 2                     | 8                        | 0                      | 0                     | 0                        |
| 6322787   | YKL063C | 0                      | 0                     | 0                        | 0                                      | 0                                     | 0                                        | 8.38                   | 1                     | 8                        | 0                      | 0                     | 0                        |
| 6324645   | NRT1    | 0                      | 0                     | 0                        | 0                                      | 0                                     | 0                                        | 5.02                   | 2                     | 8                        | 0                      | 0                     | 0                        |
| 6323270   | YLR241W | 1.28                   | 1                     | 2                        | 2.94                                   | 2                                     | 4                                        | 2.94                   | 2                     | 10                       | 0                      | 0                     | 0                        |
| 14318577  | RPN12   | 10.22                  | 2                     | 5                        | 0                                      | 0                                     | 0                                        | 10.22                  | 2                     | 10                       | 0                      | 0                     | 0                        |
| 6324061   | LYP1    | 0                      | 0                     | 0                        | 0                                      | 0                                     | 0                                        | 4.42                   | 2                     | 10                       | 0                      | 0                     | 0                        |
| 6320993   | FTR1    | 0                      | 0                     | 0                        | 0                                      | 0                                     | 0                                        | 9.90                   | 3                     | 10                       | 0                      | 0                     | 0                        |
| 6320705   | ITR1    | 0                      | 0                     | 0                        | 0                                      | 0                                     | 0                                        | 4.62                   | 2                     | 11                       | 0                      | 0                     | 0                        |
| 6319319   | ERP1    | 5.48                   | 1                     | 2                        | 5.48                                   | 1                                     | 6                                        | 17.81                  | 3                     | 12                       | 0                      | 0                     | 0                        |
| 6324828   | SEC63   | 0                      | 0                     | 0                        | 3.47                                   | 2                                     | 6                                        | 9.95                   | 5                     | 13                       | 0                      | 0                     | 0                        |
| 6319429   | FUI1    | 0                      | 0                     | 0                        | 2.35                                   | 1                                     | 3                                        | 8.45                   | 4                     | 16                       | 0                      | 0                     | 0                        |
| 6325293   | VMA13   | 8.16                   | 4                     | 18                       | 0                                      | 0                                     | 0                                        | 12.34                  | 4                     | 16                       | 0                      | 0                     | 0                        |
| 10383762  | RNQ1    | 4.20                   | 1                     | 1                        | 4.20                                   | 1                                     | 1                                        | 9.88                   | 2                     | 18                       | 0                      | 0                     | 0                        |
| 6320691   | KRE2    | 10.41                  | 3                     | 3                        | 2.94                                   | 1                                     | 3                                        | 17.19                  | 5                     | 19                       | 0                      | 0                     | 0                        |

Table S1 - Smith-Kinnaman, *et al* (2014) Abbreviations: %SC = percent sequence coverage, UP = unique peptides, PSM = peptide spectrum matches

| Accession | Acronym | %SC<br>FLAG_Rtr<br>1_1 | UP<br>FLAG_Rtr1<br>_1 | # PSM<br>FLAG_Rtr<br>1_1 | %SC<br>FLAG_Rtr1_<br>ctk1_deleti<br>on | UP<br>FLAG_Rtr<br>1_ctk1_d<br>eletion | # PSM<br>FLAG_Rtr<br>1_ctk1_d<br>eletion | %SC<br>FLAG_Rtr1<br>_2 | UP<br>FLAG_Rtr<br>1_2 | # PSM<br>FLAG_Rtr<br>1_2 | %SC<br>Rpb3_TA<br>P_WT | UP<br>Rpb3_TA<br>P_WT | # PSM<br>Rpb3_TA<br>P_WT |
|-----------|---------|------------------------|-----------------------|--------------------------|----------------------------------------|---------------------------------------|------------------------------------------|------------------------|-----------------------|--------------------------|------------------------|-----------------------|--------------------------|
| 6323630   | ERV25   | 6.16                   | 1                     | 8                        | 13.74                                  | 2                                     | 9                                        | 6.16                   | 1                     | 19                       | 0                      | 0                     | 0                        |
| 6323716   | TVP18   | 8.38                   | 1                     | 2                        | 0                                      | 0                                     | 0                                        | 8.38                   | 1                     | 19                       | 0                      | 0                     | 0                        |
| 6319289   | SNC1    | 0                      | 0                     | 0                        | 0                                      | 0                                     | 0                                        | 13.68                  | 1                     | 24                       | 0                      | 0                     | 0                        |
| 398364281 | EMP24   | 0                      | 0                     | 0                        | 6.90                                   | 1                                     | 3                                        | 22.17                  | 3                     | 25                       | 0                      | 0                     | 0                        |
| 6320298   | DNF2    | 0.87                   | 1                     | 1                        | 1.55                                   | 1                                     | 4                                        | 5.77                   | 6                     | 26                       | 0                      | 0                     | 0                        |
| 330443597 | MNN5    | 1.88                   | 1                     | 1                        | 0                                      | 0                                     | 0                                        | 9.56                   | 4                     | 26                       | 0                      | 0                     | 0                        |
| 6320897   | FCY2    | 3.00                   | 1                     | 2                        | 0                                      | 0                                     | 0                                        | 10.51                  | 5                     | 31                       | 0                      | 0                     | 0                        |
| 330443542 | SAP155  | 0.90                   | 1                     | 1                        | 1.60                                   | 1                                     | 1                                        | 0                      | 0                     | 0                        | 0                      | 0                     | 0                        |
| 14318521  | SPB4    | 1.49                   | 1                     | 1                        | 1.82                                   | 1                                     | 1                                        | 0                      | 0                     | 0                        | 0                      | 0                     | 0                        |
| 6323367   | NUP2    | 2.50                   | 1                     | 1                        | 1.53                                   | 1                                     | 1                                        | 0                      | 0                     | 0                        | 0                      | 0                     | 0                        |
| 6319303   | TPD3    | 3.62                   | 1                     | 1                        | 1.89                                   | 1                                     | 1                                        | 0                      | 0                     | 0                        | 0                      | 0                     | 0                        |
| 6324166   | RIA1    | 1.17                   | 1                     | 1                        | 0.72                                   | 1                                     | 1                                        | 0                      | 0                     | 0                        | 0                      | 0                     | 0                        |
| 398364557 | AIM21   | 1.62                   | 1                     | 1                        | 3.39                                   | 1                                     | 1                                        | 0                      | 0                     | 0                        | 0                      | 0                     | 0                        |
| 6322369   | SRS2    | 0.68                   | 1                     | 1                        | 1.02                                   | 1                                     | 1                                        | 0                      | 0                     | 0                        | 0                      | 0                     | 0                        |
| 6324088   | ZWF1    | 3.37                   | 1                     | 1                        | 3.96                                   | 1                                     | 1                                        | 0                      | 0                     | 0                        | 0                      | 0                     | 0                        |
| 6319890   | TAF2    | 0.92                   | 1                     | 1                        | 0.57                                   | 1                                     | 1                                        | 0                      | 0                     | 0                        | 0                      | 0                     | 0                        |
| 6320033   | SFA1    | 2.33                   | 1                     | 1                        | 2.07                                   | 1                                     | 1                                        | 0                      | 0                     | 0                        | 0                      | 0                     | 0                        |
| 6325429   | BSP1    | 1.74                   | 1                     | 1                        | 1.39                                   | 1                                     | 1                                        | 0                      | 0                     | 0                        | 0                      | 0                     | 0                        |
| 6323022   | YLL007C | 2.41                   | 1                     | 1                        | 1.50                                   | 1                                     | 1                                        | 0                      | 0                     | 0                        | 0                      | 0                     | 0                        |
| 6324918   | YOR342C | 3.76                   | 1                     | 1                        | 3.76                                   | 1                                     | 1                                        | 0                      | 0                     | 0                        | 0                      | 0                     | 0                        |
| 6320091   | TRM3    | 0.63                   | 1                     | 1                        | 0.70                                   | 1                                     | 1                                        | 0                      | 0                     | 0                        | 0                      | 0                     | 0                        |
| 6322925   | SIS2    | 4.27                   | 2                     | 2                        | 1.78                                   | 1                                     | 1                                        | 0                      | 0                     | 0                        | 0                      | 0                     | 0                        |
| 6321999   | SCH9    | 1.82                   | 1                     | 2                        | 1.58                                   | 1                                     | 1                                        | 0                      | 0                     | 0                        | 0                      | 0                     | 0                        |
| 6320106   | RPN6    | 2.76                   | 1                     | 2                        | 2.76                                   | 1                                     | 1                                        | 0                      | 0                     | 0                        | 0                      | 0                     | 0                        |
| 6320934   | PTC2    | 4.53                   | 2                     | 2                        | 4.53                                   | 1                                     | 1                                        | 0                      | 0                     | 0                        | 0                      | 0                     | 0                        |
| 6322545   | STE18   | 15.45                  | 1                     | 2                        | 8.18                                   | 1                                     | 1                                        | 0                      | 0                     | 0                        | 0                      | 0                     | 0                        |
| 27808714  | LAP3    | 2.42                   | 1                     | 2                        | 3.08                                   | 1                                     | 1                                        | 0                      | 0                     | 0                        | 0                      | 0                     | 0                        |
| 6322410   | IRC8    | 2.07                   | 2                     | 2                        | 0.97                                   | 1                                     | 1                                        | 0                      | 0                     | 0                        | 0                      | 0                     | 0                        |
| 14318532  | UBP6    | 6.01                   | 2                     | 3                        | 3.21                                   | 1                                     | 1                                        | 0                      | 0                     | 0                        | 0                      | 0                     | 0                        |
| 6320129   | BRE1    | 5.14                   | 3                     | 3                        | 1.29                                   | 1                                     | 1                                        | 0                      | 0                     | 0                        | 0                      | 0                     | 0                        |
| 6324287   | COG6    | 2.74                   | 2                     | 3                        | 1.31                                   | 1                                     | 1                                        | 0                      | 0                     | 0                        | 0                      | 0                     | 0                        |
| 6320846   | NTF2    | 25.60                  | 3                     | 3                        | 12.80                                  | 1                                     | 1                                        | 0                      | 0                     | 0                        | 0                      | 0                     | 0                        |
| 6324508   | MET22   | 5.60                   | 2                     | 3                        | 6.44                                   | 1                                     | 1                                        | 0                      | 0                     | 0                        | 0                      | 0                     | 0                        |
| 6319975   | GCS1    | 8.52                   | 2                     | 4                        | 5.40                                   | 1                                     | 1                                        | 0                      | 0                     | 0                        | 0                      | 0                     | 0                        |
| 63535562  | CHA1    | 10.83                  | 4                     | 4                        | 3.89                                   | 1                                     | 1                                        | 0                      | 0                     | 0                        | 0                      | 0                     | 0                        |
| 6322141   | NEO1    | 2.17                   | 3                     | 5                        | 1.48                                   | 1                                     | 1                                        | 0                      | 0                     | 0                        | 0                      | 0                     | 0                        |
| 398365175 | CDC28   | 11.07                  | 3                     | 7                        | 2.35                                   | 1                                     | 1                                        | 0                      | 0                     | 0                        | 0                      | 0                     | 0                        |

Table S1 - Smith-Kinnaman, *et al* (2014) Abbreviations: %SC = percent sequence coverage, UP = unique peptides, PSM = peptide spectrum matches

| Accession | Acronym  | %SC<br>FLAG_Rtr<br>1_1 | UP<br>FLAG_Rtr1<br>_1 | # PSM<br>FLAG_Rtr<br>1_1 | %SC<br>FLAG_Rtr1_<br>ctk1_deleti<br>on | UP<br>FLAG_Rtr<br>1_ctk1_d<br>eletion | # PSM<br>FLAG_Rtr<br>1_ctk1_d<br>eletion | %SC<br>FLAG_Rtr1<br>_2 | UP<br>FLAG_Rtr<br>1_2 | # PSM<br>FLAG_Rtr<br>1_2 | %SC<br>Rpb3_TA<br>P_WT | UP<br>Rpb3_TA<br>P_WT | # PSM<br>Rpb3_TA<br>P_WT |
|-----------|----------|------------------------|-----------------------|--------------------------|----------------------------------------|---------------------------------------|------------------------------------------|------------------------|-----------------------|--------------------------|------------------------|-----------------------|--------------------------|
| 398366131 | ADE3     | 10.04                  | 8                     | 13                       | 1.59                                   | 1                                     | 1                                        | 0                      | 0                     | 0                        | 0                      | 0                     | 0                        |
| 6322020   | VTH1     | 2.84                   | 4                     | 39                       | 1.55                                   | 1                                     | 1                                        | 0                      | 0                     | 0                        | 0                      | 0                     | 0                        |
| 6324916   | RPA43    | 21.17                  | 6                     | 87                       | 3.68                                   | 1                                     | 1                                        | 0                      | 0                     | 0                        | 0                      | 0                     | 0                        |
| 6323757   | HFD1     | 0                      | 0                     | 0                        | 1.69                                   | 1                                     | 1                                        | 0                      | 0                     | 0                        | 0                      | 0                     | 0                        |
| 6323256   | ADY4     | 0                      | 0                     | 0                        | 2.23                                   | 1                                     | 1                                        | 0                      | 0                     | 0                        | 0                      | 0                     | 0                        |
| 6320504   | ATP5     | 0                      | 0                     | 0                        | 6.13                                   | 1                                     | 1                                        | 0                      | 0                     | 0                        | 0                      | 0                     | 0                        |
| 6324144   | YML19    | 0                      | 0                     | 0                        | 13.29                                  | 1                                     | 1                                        | 0                      | 0                     | 0                        | 0                      | 0                     | 0                        |
| 398365747 | DAM1     | 0                      | 0                     | 0                        | 2.62                                   | 1                                     | 1                                        | 0                      | 0                     | 0                        | 0                      | 0                     | 0                        |
| 398365791 | MTQ2     | 0                      | 0                     | 0                        | 3.62                                   | 1                                     | 1                                        | 0                      | 0                     | 0                        | 0                      | 0                     | 0                        |
| 6323109   | EMP46    | 0                      | 0                     | 0                        | 3.15                                   | 1                                     | 1                                        | 0                      | 0                     | 0                        | 0                      | 0                     | 0                        |
| 398365027 | RPN10    | 0                      | 0                     | 0                        | 7.09                                   | 1                                     | 1                                        | 0                      | 0                     | 0                        | 0                      | 0                     | 0                        |
| 6322634   | OXP1     | 0                      | 0                     | 0                        | 0.70                                   | 1                                     | 1                                        | 0                      | 0                     | 0                        | 0                      | 0                     | 0                        |
| 6323485   | SST2     | 0                      | 0                     | 0                        | 1.86                                   | 1                                     | 1                                        | 0                      | 0                     | 0                        | 0                      | 0                     | 0                        |
| 6322729   | OAC1     | 0                      | 0                     | 0                        | 4.94                                   | 1                                     | 1                                        | 0                      | 0                     | 0                        | 0                      | 0                     | 0                        |
| 6323798   | SWP1     | 0                      | 0                     | 0                        | 3.85                                   | 1                                     | 1                                        | 0                      | 0                     | 0                        | 0                      | 0                     | 0                        |
| 6321694   | COQ6     | 0                      | 0                     | 0                        | 2.71                                   | 1                                     | 1                                        | 0                      | 0                     | 0                        | 0                      | 0                     | 0                        |
| 6321251   | COX4     | 0                      | 0                     | 0                        | 12.90                                  | 1                                     | 1                                        | 0                      | 0                     | 0                        | 0                      | 0                     | 0                        |
| 50593504  | YPL109C  | 0                      | 0                     | 0                        | 2.89                                   | 1                                     | 1                                        | 0                      | 0                     | 0                        | 0                      | 0                     | 0                        |
| 6324006   | LEM3     | 0                      | 0                     | 0                        | 2.66                                   | 1                                     | 1                                        | 0                      | 0                     | 0                        | 0                      | 0                     | 0                        |
| 6323581   | NTE1     | 0                      | 0                     | 0                        | 1.01                                   | 1                                     | 1                                        | 0                      | 0                     | 0                        | 0                      | 0                     | 0                        |
| 6320666   | HEH2     | 0                      | 0                     | 0                        | 1.06                                   | 1                                     | 1                                        | 0                      | 0                     | 0                        | 0                      | 0                     | 0                        |
| 6323377   | YLR345W  | 0                      | 0                     | 0                        | 1.77                                   | 1                                     | 1                                        | 0                      | 0                     | 0                        | 0                      | 0                     | 0                        |
| 6325244   | MRPS16   | 0                      | 0                     | 0                        | 10.74                                  | 1                                     | 1                                        | 0                      | 0                     | 0                        | 0                      | 0                     | 0                        |
| 398365817 | STE13    | 0                      | 0                     | 0                        | 1.61                                   | 1                                     | 1                                        | 0                      | 0                     | 0                        | 0                      | 0                     | 0                        |
| 6322786   | MNR2     | 0                      | 0                     | 0                        | 1.34                                   | 1                                     | 1                                        | 0                      | 0                     | 0                        | 0                      | 0                     | 0                        |
| 6323299   | DCS1     | 0                      | 0                     | 0                        | 4.00                                   | 1                                     | 1                                        | 0                      | 0                     | 0                        | 0                      | 0                     | 0                        |
| 6323777   | POM152   | 0                      | 0                     | 0                        | 1.27                                   | 1                                     | 1                                        | 0                      | 0                     | 0                        | 0                      | 0                     | 0                        |
| 6323521   | VAN1     | 0                      | 0                     | 0                        | 2.43                                   | 1                                     | 1                                        | 0                      | 0                     | 0                        | 0                      | 0                     | 0                        |
| 6321838   | YHK8     | 0                      | 0                     | 0                        | 1.75                                   | 1                                     | 1                                        | 0                      | 0                     | 0                        | 0                      | 0                     | 0                        |
| 6321688   | MGA1     | 0                      | 0                     | 0                        | 1.97                                   | 1                                     | 1                                        | 0                      | 0                     | 0                        | 0                      | 0                     | 0                        |
| 6323415   | SMC6     | 0                      | 0                     | 0                        | 0.72                                   | 1                                     | 1                                        | 0                      | 0                     | 0                        | 0                      | 0                     | 0                        |
| 398365989 | YLR361C- | 0                      | 0                     | 0                        | 12.24                                  | 1                                     | 1                                        | 0                      | 0                     | 0                        | 0                      | 0                     | 0                        |
| 6320856   | ISC1     | 0                      | 0                     | 0                        | 2.10                                   | 1                                     | 1                                        | 0                      | 0                     | 0                        | 0                      | 0                     | 0                        |
| 6323515   | NDI1     | 0                      | 0                     | 0                        | 3.90                                   | 1                                     | 1                                        | 0                      | 0                     | 0                        | 0                      | 0                     | 0                        |
| 6322031   | POT1     | 0                      | 0                     | 0                        | 1.68                                   | 1                                     | 1                                        | 0                      | 0                     | 0                        | 0                      | 0                     | 0                        |
| 14318490  | CAK1     | 0                      | 0                     | 0                        | 2.45                                   | 1                                     | 1                                        | 0                      | 0                     | 0                        | 0                      | 0                     | 0                        |
| 6325257   | CIT3     | 0                      | 0                     | 0                        | 2.47                                   | 1                                     | 1                                        | 0                      | 0                     | 0                        | 0                      | 0                     | 0                        |

Table S1 - Smith-Kinnaman, *et al* (2014) Abbreviations: %SC = percent sequence coverage, UP = unique peptides, PSM = peptide spectrum matches

| Accession | Acronym | %SC<br>FLAG_Rtr<br>1_1 | UP<br>FLAG_Rtr1<br>_1 | # PSM<br>FLAG_Rtr<br>1_1 | %SC<br>FLAG_Rtr1_<br>ctk1_deleti<br>on | UP<br>FLAG_Rtr<br>1_ctk1_d<br>eletion | # PSM<br>FLAG_Rtr<br>1_ctk1_d<br>eletion | %SC<br>FLAG_Rtr1<br>_2 | UP<br>FLAG_Rtr<br>1_2 | # PSM<br>FLAG_Rtr<br>1_2 | %SC<br>Rpb3_TA<br>P_WT | UP<br>Rpb3_TA<br>P_WT | # PSM<br>Rpb3_TA<br>P_WT |
|-----------|---------|------------------------|-----------------------|--------------------------|----------------------------------------|---------------------------------------|------------------------------------------|------------------------|-----------------------|--------------------------|------------------------|-----------------------|--------------------------|
| 6323257   | ECM22   | 0                      | 0                     | 0                        | 1.23                                   | 1                                     | 1                                        | 0                      | 0                     | 0                        | 0                      | 0                     | 0                        |
| 6323492   | GAB1    | 0                      | 0                     | 0                        | 2.54                                   | 1                                     | 1                                        | 0                      | 0                     | 0                        | 0                      | 0                     | 0                        |
| 6322779   | YKL071W | 0                      | 0                     | 0                        | 3.13                                   | 1                                     | 1                                        | 0                      | 0                     | 0                        | 0                      | 0                     | 0                        |
| 330443687 | YMR317  | 0                      | 0                     | 0                        | 1.67                                   | 1                                     | 1                                        | 0                      | 0                     | 0                        | 0                      | 0                     | 0                        |
| 6322216   | MND2    | 0                      | 0                     | 0                        | 4.08                                   | 1                                     | 1                                        | 0                      | 0                     | 0                        | 0                      | 0                     | 0                        |
| 9755337   | NYV1    | 0                      | 0                     | 0                        | 3.95                                   | 1                                     | 1                                        | 0                      | 0                     | 0                        | 0                      | 0                     | 0                        |
| 398366349 | RIF2    | 0                      | 0                     | 0                        | 4.05                                   | 1                                     | 1                                        | 0                      | 0                     | 0                        | 0                      | 0                     | 0                        |
| 6323548   | RPM2    | 0                      | 0                     | 0                        | 0.75                                   | 1                                     | 1                                        | 0                      | 0                     | 0                        | 0                      | 0                     | 0                        |
| 398364459 | SCS3    | 0                      | 0                     | 0                        | 3.95                                   | 1                                     | 1                                        | 0                      | 0                     | 0                        | 0                      | 0                     | 0                        |
| 6323956   | LIP1    | 0                      | 0                     | 0                        | 6.00                                   | 1                                     | 1                                        | 0                      | 0                     | 0                        | 0                      | 0                     | 0                        |
| 37362686  | STB1    | 0                      | 0                     | 0                        | 2.62                                   | 1                                     | 1                                        | 0                      | 0                     | 0                        | 0                      | 0                     | 0                        |
| 6321342   | TOS8    | 0                      | 0                     | 0                        | 3.99                                   | 1                                     | 1                                        | 0                      | 0                     | 0                        | 0                      | 0                     | 0                        |
| 6323000   | TPO1    | 0                      | 0                     | 0                        | 2.73                                   | 1                                     | 1                                        | 0                      | 0                     | 0                        | 0                      | 0                     | 0                        |
| 398364289 | VAB2    | 0                      | 0                     | 0                        | 3.90                                   | 1                                     | 1                                        | 0                      | 0                     | 0                        | 0                      | 0                     | 0                        |
| 6324803   | WTM2    | 0                      | 0                     | 0                        | 2.36                                   | 1                                     | 1                                        | 0                      | 0                     | 0                        | 0                      | 0                     | 0                        |
| 398366213 | LYS4    | 0                      | 0                     | 0                        | 2.74                                   | 1                                     | 1                                        | 0                      | 0                     | 0                        | 0                      | 0                     | 0                        |
| 6323285   | HAP1    | 0                      | 0                     | 0                        | 1.07                                   | 1                                     | 1                                        | 0                      | 0                     | 0                        | 0                      | 0                     | 0                        |
| 6321912   | MSH1    | 0                      | 0                     | 0                        | 0.94                                   | 1                                     | 1                                        | 0                      | 0                     | 0                        | 0                      | 0                     | 0                        |
| 10383785  | CWH43   | 0                      | 0                     | 0                        | 1.26                                   | 1                                     | 1                                        | 0                      | 0                     | 0                        | 0                      | 0                     | 0                        |
| 398364257 | SPF1    | 0                      | 0                     | 0                        | 2.06                                   | 1                                     | 1                                        | 0                      | 0                     | 0                        | 0                      | 0                     | 0                        |
| 6323304   | MCM5    | 1.03                   | 1                     | 1                        | 1.94                                   | 1                                     | 2                                        | 0                      | 0                     | 0                        | 0                      | 0                     | 0                        |
| 398366185 | YLR419W | 0.77                   | 1                     | 1                        | 0.70                                   | 1                                     | 2                                        | 0                      | 0                     | 0                        | 0                      | 0                     | 0                        |
| 6319366   | SFT2    | 5.58                   | 1                     | 1                        | 5.58                                   | 1                                     | 2                                        | 0                      | 0                     | 0                        | 0                      | 0                     | 0                        |
| 6324749   | ALE1    | 2.26                   | 1                     | 1                        | 2.26                                   | 1                                     | 2                                        | 0                      | 0                     | 0                        | 0                      | 0                     | 0                        |
| 6325112   | KES1    | 2.30                   | 1                     | 2                        | 3.23                                   | 1                                     | 2                                        | 0                      | 0                     | 0                        | 0                      | 0                     | 0                        |
| 6323682   | SUB1    | 14.04                  | 3                     | 3                        | 4.79                                   | 1                                     | 2                                        | 0                      | 0                     | 0                        | 0                      | 0                     | 0                        |
| 6325049   | TYW1    | 2.84                   | 2                     | 3                        | 1.23                                   | 1                                     | 2                                        | 0                      | 0                     | 0                        | 0                      | 0                     | 0                        |
| 6325179   | ATP4    | 17.62                  | 4                     | 4                        | 12.30                                  | 2                                     | 2                                        | 0                      | 0                     | 0                        | 0                      | 0                     | 0                        |
| 6323882   | YMR226C | 19.85                  | 4                     | 5                        | 10.11                                  | 2                                     | 2                                        | 0                      | 0                     | 0                        | 0                      | 0                     | 0                        |
| 6323505   | ERO1    | 0                      | 0                     | 0                        | 2.31                                   | 1                                     | 2                                        | 0                      | 0                     | 0                        | 0                      | 0                     | 0                        |
| 37362643  | GET2    | 0                      | 0                     | 0                        | 3.51                                   | 1                                     | 2                                        | 0                      | 0                     | 0                        | 0                      | 0                     | 0                        |
| 14318552  | PTR3    | 0                      | 0                     | 0                        | 1.47                                   | 1                                     | 2                                        | 0                      | 0                     | 0                        | 0                      | 0                     | 0                        |
| 6320179   | RTK1    | 2.26                   | 1                     | 1                        | 1.13                                   | 1                                     | 3                                        | 0                      | 0                     | 0                        | 0                      | 0                     | 0                        |
| 6324513   | GPD2    | 4.77                   | 2                     | 2                        | 3.41                                   | 1                                     | 3                                        | 0                      | 0                     | 0                        | 0                      | 0                     | 0                        |
| 398364869 | APC11   | 0                      | 0                     | 0                        | 4.24                                   | 1                                     | 3                                        | 0                      | 0                     | 0                        | 0                      | 0                     | 0                        |
| 6319912   | SED4    | 0                      | 0                     | 0                        | 5.16                                   | 2                                     | 3                                        | 0                      | 0                     | 0                        | 0                      | 0                     | 0                        |
| 6325029   | ALG5    | 2.69                   | 1                     | 2                        | 2.69                                   | 1                                     | 4                                        | 0                      | 0                     | 0                        | 0                      | 0                     | 0                        |
