# Supplementary material
Source: PubMed Central journal article supplement (PMC4074173)
Supplement: NIHMS584158-supplement-Supplementary_material.pdf [file NIHMS584158-supplement-Supplementary_material.pdf]

## Supplemental materials

### The Interactome of the Atypical Phosphatase Rtr1 in *Saccharomyces cerevisiae*

Whitney R. Smith-Kinnaman<sup>a</sup>, Michael J. Berna<sup>a</sup>, Gerald O. Hunter<sup>a</sup>, Jason D. True<sup>a</sup>, Peter Hsu<sup>b</sup>, Gabriela I. Cabello<sup>a</sup>, Melanie J. Fox<sup>a</sup>, Gabriele Varani<sup>b,c</sup>, and Amber L. Mosley<sup>a,d,\*</sup>

<sup>a</sup>Department of Biochemistry and Molecular Biology, Indiana University School of Medicine, Indianapolis, Indiana 46202, USA

<sup>b</sup>Department of Chemistry, University of Washington, Seattle, Washington, USA

<sup>c</sup>Department of Biochemistry, University of Washington, Seattle, Washington, USA

<sup>d</sup>Center for Computational Biology and Bioinformatics, Indiana University School of Medicine, Indianapolis, IN 46202, USA

\*Correspondence should be addressed to almosley@iu.edu

### Supplemental methods

#### Characterization of the Rtr1 interactome using SAINT

All SAINT and fold change (FC-A and FC-B) scores were calculated through [www.crapome.org](http://www.crapome.org). Input tables were formatted according to the guidelines outlined on the website and in various SAINT publications. FC-A is the least stringent score and compares the enrichment values in the affinity purification to the average number of PSMs for a given protein in mock controls. FC-B is a more stringent fold-change calculation and takes the PSM values from the three mock purifications in which the protein was most frequently detected. This allows for removal of contaminant proteins that are sometimes detected at high levels depending on the degree of contamination or carryover (Choi et al., 2011; Mellacheruvu et al., 2013). The SAINT probability values are determined through modeling of each prey-bait pair with mixture-model analysis of the PSM distributions (Choi et al., 2011). As mentioned in the main text, the TAP double affinity purifications had significantly higher numbers of PSMs for Rtr1 and high-level interacting partners such as the subunits of RNAPII. As such, we chose to perform SAINT analysis of the single affinity and double affinity purifications separately to identify both stable and transient Rtr1 interactions (Tables S2, S4, S6, S7). We also performed SAINT express analysis of the combined datasets as reported in Table S7 and Figure S1. Since analysis of the Rtr1 *ctk1Δ* interactome using both TAP and FLAG tagged Rtr1, the comparison of SAINT values for the WT and *ctk1Δ* interactome used both the TAP and FLAG affinity purifications as independent replicates (Table S8). The Rtr1-V5 data was not included in the analysis in Table S8 since no data was obtained on Rtr1-V5 *ctk1Δ*.

#### In vitro interaction analyses

Ctk1 and Ctk2 were cloned into pYES-DEST52 (Invitrogen) and transformed into

BY4741. Each strain, Ctk1 and Ctk2 pYES-DEST52 was grown overnight in 6 mL cultures of Sc-Ura/2% glucose. The next day, these cultures were centrifuged, washed with water, and then grown overnight in 400 mL cultures of Sc-Ura 2% Raffinose. The next morning, cultures were diluted to OD<sub>600</sub> ~1.5-2.5 in 400 mL cultures of 3X YEP/6% Galactose (3% yeast extract, 6% peptone, 6% Galactose) and fusion proteins were induced for 6 hours. After induction, cells were centrifuged, washed with water and frozen at -80°C until lysis.

Ctk1 and Ctk2 pellets were resuspended in lysis buffer (40mM Hepes-KOH, pH 7.5; 10% glycerol; 100mM NaCl; 0.1% Tween-20; 2X protease inhibitors and 0.5mM DTT). After clarification, each lysate was then incubated with 200 uL of anti-V5 agarose for at least 3 hours at 4° C on a rotating wheel. Following incubation with anti-V5 agarose, the supernatant was separated from the resin via gravity flow. To each immobilized V5 protein, 2 ug of Rtr1-GST was added, and incubated at 4° C on a rotating wheel, overnight. In addition to the two samples, 2 ug of Rtr1-GST was also added to 200 uL of anti-V5 agarose to serve as a negative control. The next day, the resin was then washed with 20 mL of lysis buffer containing 350 mM NaCl. Following wash, the resin from each sample and control were resuspended in 200 uL of 1X SDS buffer and prepped for SDS PAGE analysis.

## **Description of Supplemental Materials**

**Figure S1: Identification of the Rtr1 interactome by AP-MS followed by SAINT.** A. Overview of the interactions identified by SAINT in double affinity Rtr1-TAP purifications. Graph compares the FC-B score against the SAINT probability scores. The dashed line represents the 0.75 probability cut-off. Proteins of interest are indicated with a label. All identifiers for these data are included in Table S6. B. High confidence Rtr1 interaction network illustrating the unique and shared interactions identified with a SAINT probability score of  $\geq 0.8$ . A legend describing all nodes and edges is shown below the network.

**Figure S2: The interaction between Rtr1 and RNAPII is significantly decreased in the absence of Ctk1.** A. The number of peptide-spectrum matches (PSMs) for each protein of interest was summed from each purification as indicated at the top of the heat map. An intensity scale of the number of PSMs is shown below the figure. B. FC-B scores for Rtr1 affinity purifications from WT (black bars) and *CTK1* deletion (red bars) yeast strains for proteins of interest.

**Figure S3: Analysis of the interaction between Rtr1 and CTDKI subunits.** A. Double co-immunoprecipitation of Ctk1-TAP followed by TEV cleavage and V5-IP for Rtr1-V5. The input material (whole cell extract – WCE) and IP material was separated by SDS-PAGE and then subjected to western blot with either anti-calmodulin binding peptide or anti-V5 antibodies as indicated. The expected mobility of each tagged protein is indicated to the right with arrows. C. *In vitro* analysis of the Rtr1-Ctk1 and Rtr1-Ctk2 interactions. Ctk1- or Ctk2-V5 were overexpressed in yeast through galactose induction in the pYES system. After affinity capture on anti-V5 agarose, recombinant Rtr1-GST

was added to check for direct interactions. The antibody used for western detection is indicated to the right and the sample type is indicated at the bottom of the figure below the lane numbers.

**Table S1: Full Rtr1 interactome dataset with all control and Rtr1 affinity purifications.** The NCBI gene accession number and protein sequence annotations are provided in the table along with the standard yeast protein name according to the Saccharomyces Genome Database (SGD, [www.yeastgenome.org](http://www.yeastgenome.org)). For each purification, the percent protein sequence coverage (%SC), number of unique peptides (UP), and number of peptide spectrum matches (PSMs, also known as spectral counts) are given. Since this table is over 300 printed pages, it is provided as a separate supplemental file.

**Table S2: Single affinity purification (V5/FLAG) SAINT analysis.** Output list from SAINT express analysis of the Rtr1-V5 and Rtr1-FLAG affinity purifications compared to mock controls. Table includes the SGD protein ID acronym, the fold-change A value (FC\_A), the fold-change B value (FC\_B), and the SAINT probability. In addition, the presence (1) or absence (0) of each interaction with Rtr1 in the iRefIndex ([irefindex.org](http://irefindex.org)) database is indicated (iREF). High confidence interactions have a SAINT value of  $\geq 0.75$  and are shown in green boxes, moderate confidence interactions have a SAINT value of 0.45-0.75 shown in yellow boxes, and low confidence interactions have a SAINT value of 0.01-0.44 shown in red boxes.

**Table S3: GOSTat analysis output of significant interactions in single affinity purifications.** The top 30 GO terms enriched in the Rtr1-FLAG/V5 dataset true interactions (SAINT  $\geq 0.75$ ). The GO term, significant gene IDs for proteins identified in the Rtr1 interactome belonging to each term, the number of IDs in the Rtr1 interactome for each term (count), total number of genes associated with each term (Total), and p-value are given in the table.

**Table S4: Output list from SAINT express analysis of the Rtr1-FLAG affinity purifications compared to mock controls.** Table includes the SGD protein ID acronym, the fold-change A value (FC\_A), the fold-change B value (FC\_B), and the SAINT probability. In addition, the presence (1) or absence (0) of each interaction with Rtr1 in the iRefIndex ([irefindex.org](http://irefindex.org)) database is indicated (iREF). High confidence interactions have a SAINT value of  $\geq 0.75$  and are shown in green boxes, moderate confidence interactions have a SAINT value of 0.45-0.75 shown in yellow boxes, and low confidence interactions have a SAINT value of 0.01-0.44 shown in red boxes.

**Table S5: GOSTat analysis output of significant interactions in Rtr1-FLAG purifications.** The top 30 GO terms enriched in the Rtr1-FLAG dataset true interactions (SAINT  $\geq 0.75$ ). The GO term, significant gene IDs for proteins identified in the Rtr1 interactome belonging to each term, the number of IDs in the Rtr1 interactome for each term (count), total number of genes associated with each term (Total), and p-value are given in the table.

**Table S6: Output list from SAINT express analysis of the Rtr1-TAP affinity purifications compared to mock controls.** Table includes the SGD protein ID acronym, the fold-change A value (FC\_A), the fold-change B value (FC\_B), and the SAINT probability. In addition, the presence (1) or absence (0) of each interaction with Rtr1 in the iRefIndex (**irefindex.org**) database is indicated (iREF). High confidence interactions have a SAINT value of  $\geq 0.75$  and are shown in green boxes, moderate confidence interactions have a SAINT value of 0.45-0.75 shown in yellow boxes, and low confidence interactions have a SAINT value of 0.01-0.44 shown in red boxes.

**Table S7: Output list from SAINT express analysis of the combined Rtr1 affinity purifications compared to mock controls.** Table includes the SGD protein ID acronym, the fold-change A value (FC\_A), the fold-change B value (FC\_B), and the SAINT probability. In addition, the presence (1) or absence (0) of each interaction with Rtr1 in the iRefIndex (**irefindex.org**) database is indicated (iREF). High confidence interactions have a SAINT value of  $\geq 0.75$  and are shown in green boxes, moderate confidence interactions have a SAINT value of 0.45-0.75 shown in yellow boxes, and low confidence interactions have a SAINT value of 0.01-0.44 shown in red boxes.

**Table S8: Output list from SAINT express analysis of the Rtr1-WT and Rtr1-*ctk1Δ* affinity purifications compared to mock controls.** Table includes the SGD protein ID acronym, the fold-change A value (FC\_A), the fold-change B value (FC\_B), and the SAINT probability. In addition, the presence (1) or absence (0) of each interaction with Rtr1 in the iRefIndex (**irefindex.org**) database is indicated (iREF). High confidence interactions have a SAINT value of  $\geq 0.75$  and are shown in green boxes, moderate confidence interactions have a SAINT value of 0.45-0.75 shown in yellow boxes, and low confidence interactions have a SAINT value of 0.01-0.44 shown in red boxes.

**Table S9: Yeast strains used in this study.** The strain name, genotype, and source for each strain are provided.

**A**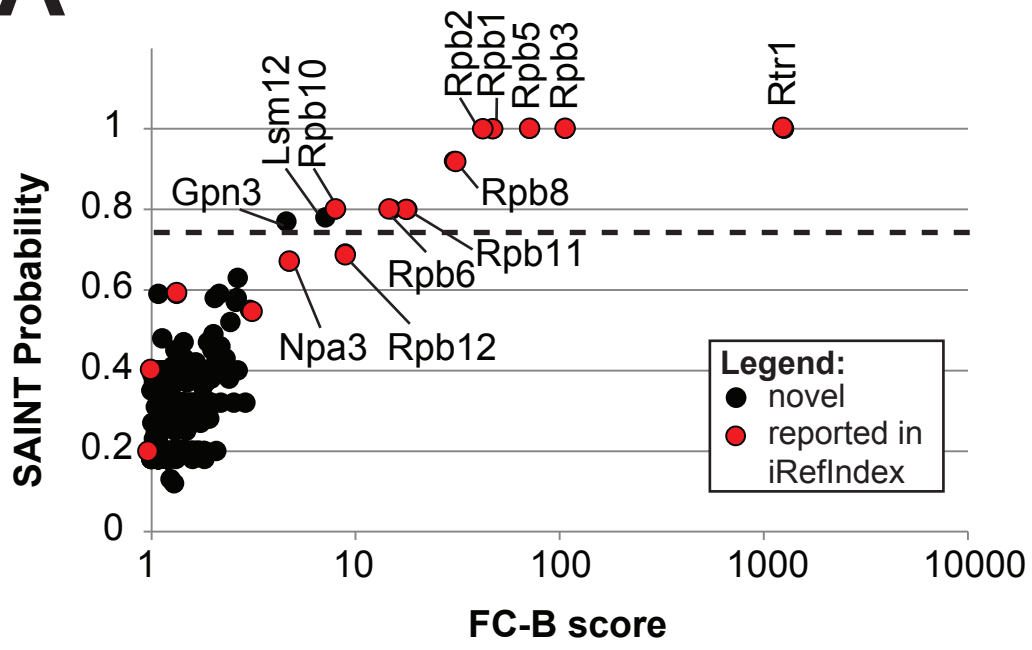**B**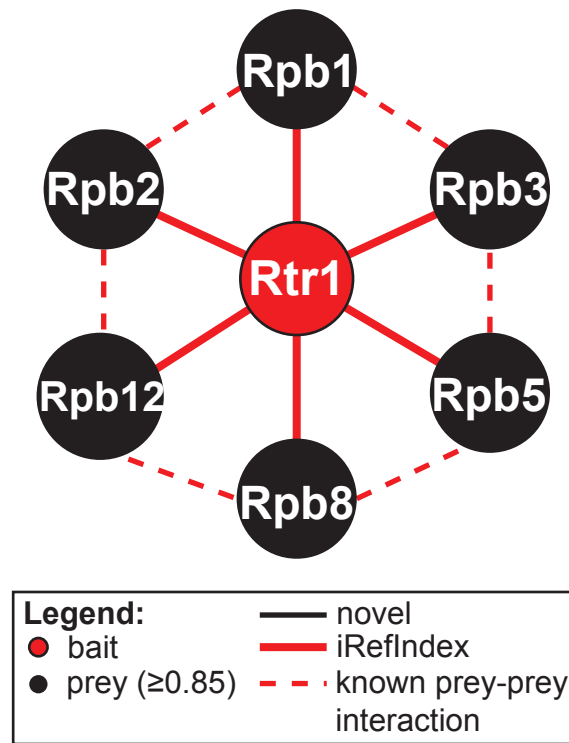

Figure S1

**A**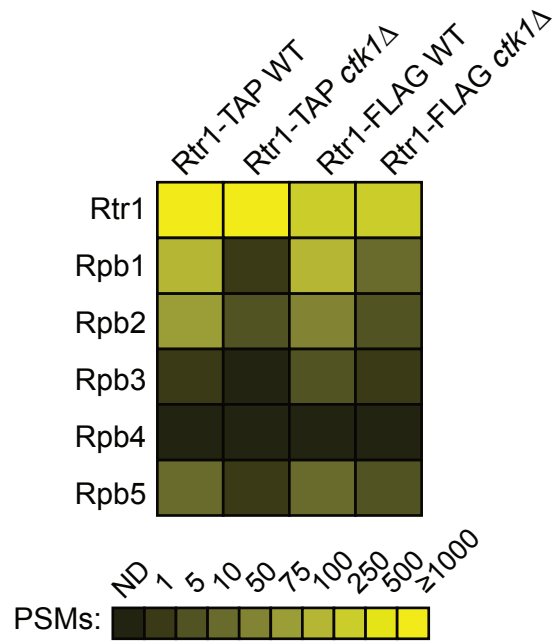**B**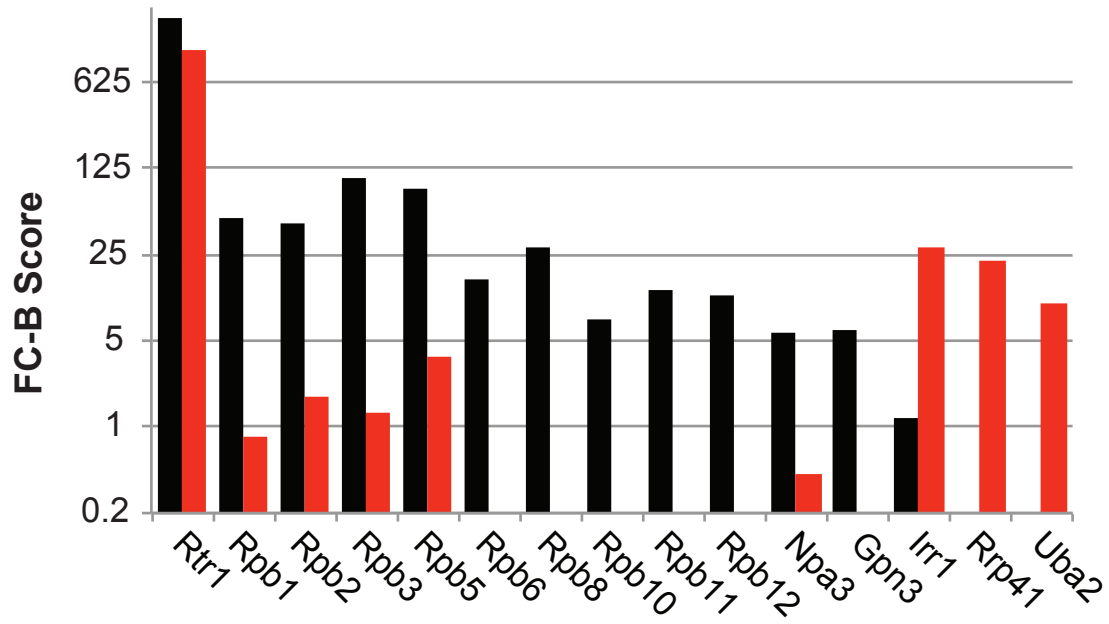

Figure S2

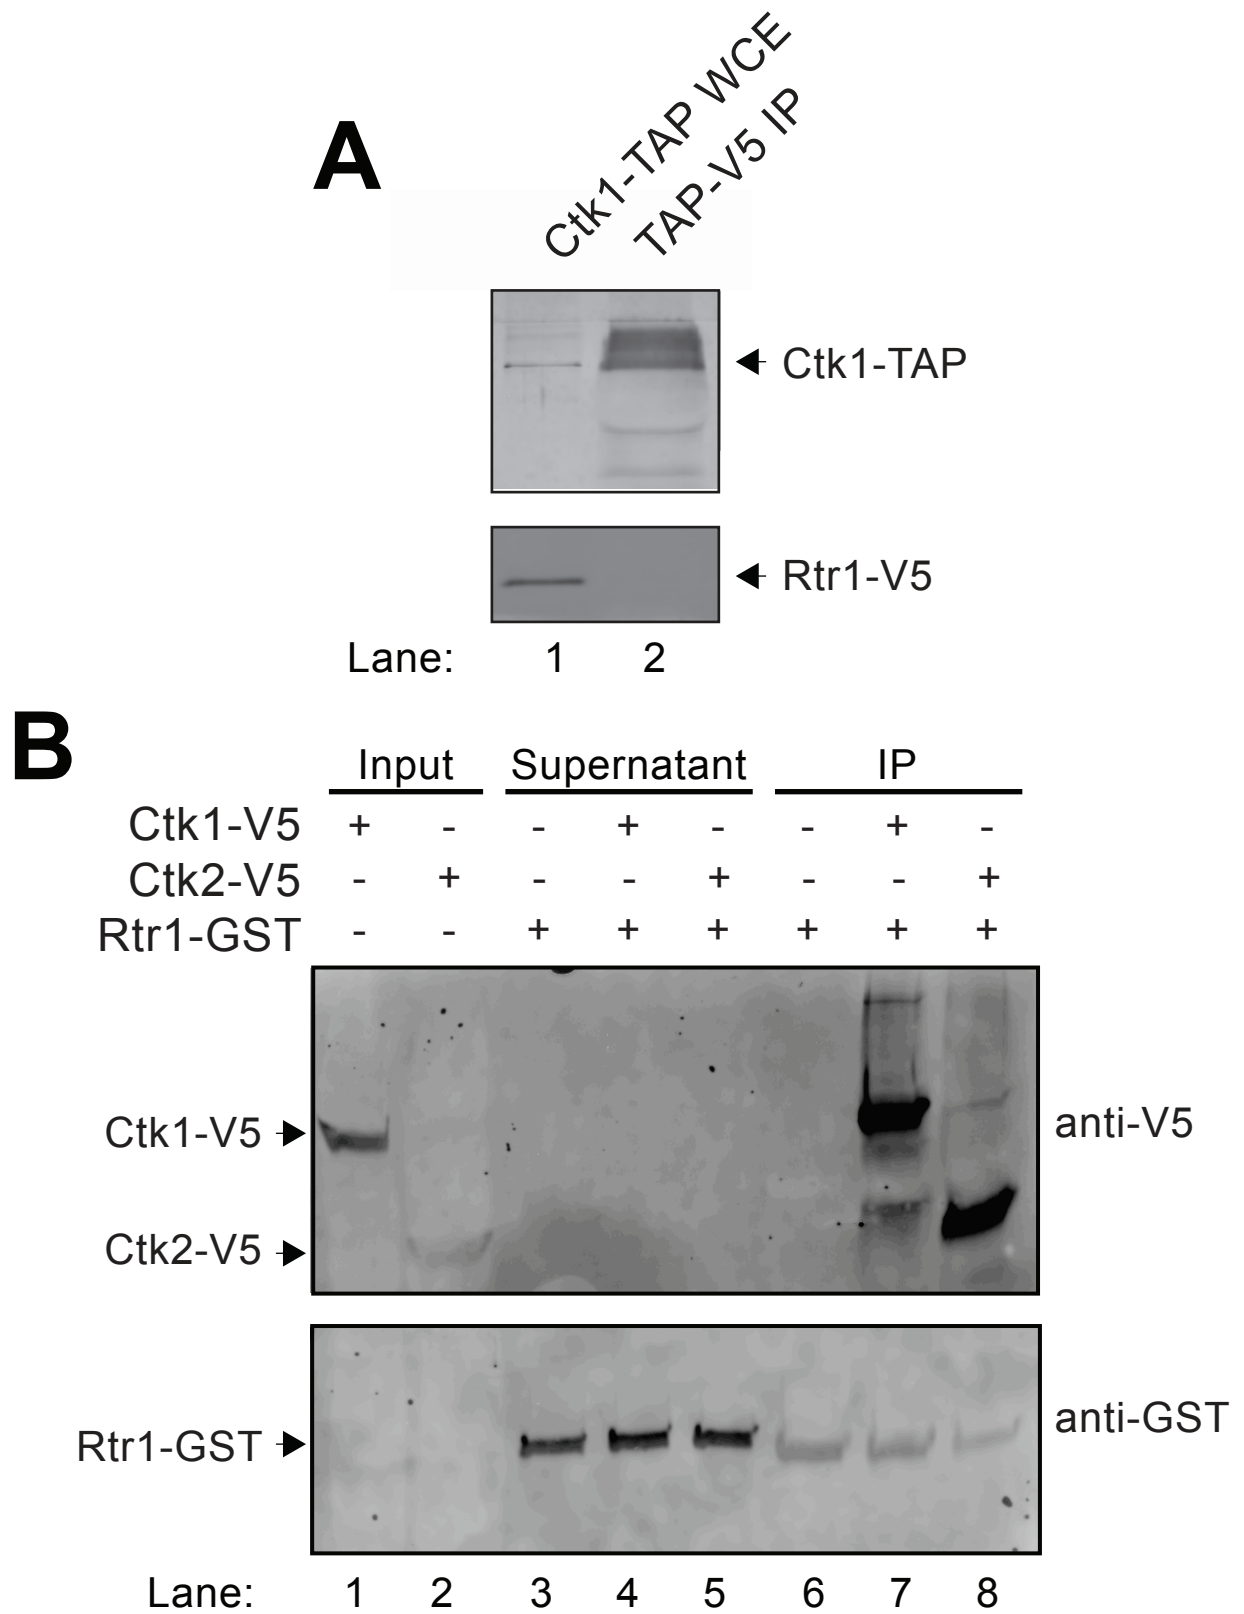

Figure S3

Table S2: Single affinity purification (V5/FLAG) SAINT analysis Page 1

| V5/FLAG<br>PROTEIN<br>ID | RTR1<br>V5/FLAG<br>FC_A | RTR1<br>V5/FLAG<br>FC_B | V5/FLAG<br>SAINT<br>PROB | RTR1<br>V5/FLAG<br>iREF |
|--------------------------|-------------------------|-------------------------|--------------------------|-------------------------|
| RTR1                     | 261.08                  | 144.72                  | 1                        | 1                       |
| RPB3                     | 30.32                   | 20.62                   | 1                        | 1                       |
| RPB2                     | 20.09                   | 11.19                   | 1                        | 1                       |
| RPB8                     | 13.54                   | 10.08                   | 1                        | 1                       |
| RPB1                     | 20.38                   | 9.66                    | 1                        | 1                       |
| RPB12                    | 13                      | 6.27                    | 1                        | 1                       |
| RPB5                     | 9.37                    | 4.34                    | 0.99                     | 1                       |
| RPB11                    | 7.19                    | 4.16                    | 0.99                     | 1                       |
| FAA4                     | 2.75                    | 1.51                    | 0.98                     | 0                       |
| RPL33A                   | 3.89                    | 1.34                    | 0.98                     | 0                       |
| IDH2                     | 6.51                    | 2.55                    | 0.95                     | 0                       |
| VTC4                     | 4.83                    | 2.24                    | 0.94                     | 0                       |
| VMA8                     | 3.98                    | 1.65                    | 0.93                     | 0                       |
| CYM1                     | 2.82                    | 2.05                    | 0.91                     | 0                       |
| SIN4                     | 1.75                    | 1.58                    | 0.9                      | 0                       |
| RVS167                   | 3.06                    | 1.36                    | 0.88                     | 0                       |
| DHH1                     | 2.01                    | 1.02                    | 0.87                     | 0                       |
| ECM29                    | 1.87                    | 1.13                    | 0.86                     | 0                       |
| ENP1                     | 5.1                     | 2.24                    | 0.85                     | 0                       |
| ENA1                     | 2.35                    | 1.15                    | 0.85                     | 0                       |
| YPK1                     | 2.14                    | 1.05                    | 0.81                     | 0                       |
| HEM14                    | 1.76                    | 1.33                    | 0.8                      | 0                       |
| NPA3                     | 5.57                    | 2.05                    | 0.79                     | 1                       |
| YLR413W                  | 3.58                    | 1.44                    | 0.7                      | 0                       |
| HSP26                    | 5.24                    | 2.12                    | 0.69                     | 0                       |
| VAC8                     | 2.11                    | 1.32                    | 0.69                     | 0                       |
| PHO84                    | 79.33                   | 11.08                   | 0.67                     | 0                       |
| TAP42                    | 12.11                   | 3.13                    | 0.67                     | 0                       |
| ERV25                    | 6.45                    | 2.7                     | 0.67                     | 0                       |
| DIP5                     | 5.42                    | 2.33                    | 0.67                     | 0                       |
| PHO81                    | 2.56                    | 2                       | 0.67                     | 0                       |
| PUF4                     | 2.23                    | 1.81                    | 0.67                     | 0                       |
| ARO9                     | 3.16                    | 1.71                    | 0.67                     | 0                       |
| DRS2                     | 2.75                    | 1.58                    | 0.67                     | 0                       |
| VPS5                     | 2.19                    | 1.45                    | 0.67                     | 0                       |
| REX4                     | 1.84                    | 1.43                    | 0.67                     | 0                       |
| CAR2                     | 3.15                    | 1.41                    | 0.67                     | 0                       |
| VPS13                    | 2.65                    | 1.32                    | 0.67                     | 0                       |
| TLG2                     | 2.56                    | 1.29                    | 0.67                     | 0                       |
| RPL33B                   | 4.13                    | 1.01                    | 0.67                     | 0                       |
| TVP18                    | 6.9                     | 2.8                     | 0.66                     | 0                       |
| HSP42                    | 3.47                    | 2.11                    | 0.66                     | 0                       |
| AQR1                     | 2.72                    | 1.91                    | 0.66                     | 0                       |
| AAD14                    | 2.33                    | 1.84                    | 0.66                     | 0                       |



Table S2: Single affinity purification (V5/FLAG) SAINT analysis Page 2

| V5/FLAG<br>PROTEIN<br>ID | RTR1<br>V5/FLAG<br>FC_A | RTR1<br>V5/FLAG<br>FC_B | V5/FLAG<br>SAINT<br>PROB | RTR1<br>V5/FLAG<br>iREF |
|--------------------------|-------------------------|-------------------------|--------------------------|-------------------------|
| PEP12                    | 3.07                    | 1.82                    | 0.66                     | 0                       |
| SYN8                     | 2.96                    | 1.81                    | 0.66                     | 0                       |
| LSB3                     | 3.76                    | 1.76                    | 0.66                     | 0                       |
| PPN1                     | 1.94                    | 1.63                    | 0.66                     | 0                       |
| FOL2                     | 6.63                    | 1.54                    | 0.66                     | 0                       |
| YPR097W                  | 1.78                    | 1.54                    | 0.66                     | 0                       |
| RPC19                    | 2.49                    | 1.48                    | 0.66                     | 0                       |
| ECM32                    | 1.83                    | 1.55                    | 0.65                     | 0                       |
| COG4                     | 1.67                    | 1.46                    | 0.65                     | 0                       |
| TIF4631                  | 1.8                     | 1.06                    | 0.65                     | 0                       |
| ERG26                    | 1.76                    | 1                       | 0.65                     | 0                       |
| RLP7                     | 4.42                    | 1.64                    | 0.64                     | 0                       |
| SSP1                     | 3.57                    | 1.56                    | 0.64                     | 0                       |
| STH1                     | 2.3                     | 1.32                    | 0.64                     | 0                       |
| FRD1                     | 1.95                    | 1.31                    | 0.64                     | 0                       |
| YIP4                     | 2.19                    | 1.18                    | 0.64                     | 0                       |
| KEX1                     | 1.92                    | 1.13                    | 0.64                     | 0                       |
| VTC3                     | 6.31                    | 1.61                    | 0.63                     | 0                       |
| GNP1                     | 2.82                    | 1.58                    | 0.63                     | 0                       |
| YNR065C                  | 4.1                     | 1.32                    | 0.63                     | 0                       |
| ERG20                    | 1.83                    | 1.05                    | 0.63                     | 0                       |
| NHX1                     | 2.9                     | 1.88                    | 0.62                     | 0                       |
| SFL1                     | 2.39                    | 1.82                    | 0.62                     | 0                       |
| DMA1                     | 2.64                    | 1.8                     | 0.62                     | 0                       |
| PRP6                     | 2.21                    | 1.65                    | 0.62                     | 0                       |
| GRX1                     | 1.99                    | 1.65                    | 0.62                     | 0                       |
| TRA1                     | 2.02                    | 1.63                    | 0.62                     | 0                       |
| YLR241W                  | 3.23                    | 1.48                    | 0.62                     | 0                       |
| LST8                     | 1.77                    | 1.48                    | 0.62                     | 0                       |
| PRE2                     | 1.68                    | 1.47                    | 0.62                     | 0                       |
| KRE9                     | 1.64                    | 1.45                    | 0.62                     | 0                       |
| YBR238C                  | 1.56                    | 1.4                     | 0.62                     | 0                       |
| JNM1                     | 1.9                     | 1.23                    | 0.62                     | 0                       |
| BBC1                     | 2.79                    | 1.2                     | 0.62                     | 0                       |
| LEO1                     | 6.5                     | 2.52                    | 0.61                     | 0                       |
| ERG5                     | 2.19                    | 1.57                    | 0.61                     | 0                       |
| ARD1                     | 2.4                     | 1.55                    | 0.61                     | 0                       |
| EAP1                     | 2.18                    | 1.54                    | 0.61                     | 0                       |
| YLR422W                  | 1.73                    | 1.51                    | 0.61                     | 0                       |
| RCR1                     | 1.71                    | 1.45                    | 0.61                     | 0                       |
| CDC24                    | 2.03                    | 1.42                    | 0.61                     | 0                       |
| SRB8                     | 1.53                    | 1.38                    | 0.61                     | 0                       |
| GEF1                     | 1.53                    | 1.38                    | 0.61                     | 0                       |
| YDL073W                  | 1.55                    | 1.37                    | 0.61                     | 0                       |

Table S2: Single affinity purification (V5/FLAG) SAINT analysis Page 3

| V5/FLAG<br>PROTEIN<br>ID | RTR1<br>V5/FLAG<br>FC_A | RTR1<br>V5/FLAG<br>FC_B | V5/FLAG<br>SAINT<br>PROB | RTR1<br>V5/FLAG<br>iREF |
|--------------------------|-------------------------|-------------------------|--------------------------|-------------------------|
| RHB1                     | 1.55                    | 1.37                    | 0.61                     | 0                       |
| CBK1                     | 1.55                    | 1.37                    | 0.61                     | 0                       |
| SNX3                     | 1.55                    | 1.37                    | 0.61                     | 0                       |
| SWI6                     | 1.45                    | 1.33                    | 0.61                     | 0                       |
| MDM38                    | 1.45                    | 1.33                    | 0.61                     | 0                       |
| YPR089W                  | 1.45                    | 1.33                    | 0.61                     | 0                       |
| SEC8                     | 1.45                    | 1.33                    | 0.61                     | 0                       |
| TOR1                     | 1.45                    | 1.33                    | 0.61                     | 0                       |
| LYS9                     | 1.65                    | 1.32                    | 0.61                     | 0                       |
| UTR1                     | 1.4                     | 1.19                    | 0.61                     | 0                       |
| PCM1                     | 1.43                    | 1.18                    | 0.61                     | 0                       |
| AAP1                     | 1.5                     | 1.11                    | 0.61                     | 0                       |
| HOC1                     | 1.39                    | 1.08                    | 0.61                     | 0                       |
| CHS1                     | 1.89                    | 1.06                    | 0.59                     | 0                       |
| FCY2                     | 7.52                    | 1.9                     | 0.58                     | 0                       |
| HFA1                     | 3.59                    | 1.4                     | 0.58                     | 0                       |
| PDS5                     | 10.38                   | 2.11                    | 0.57                     | 0                       |
| GDE1                     | 4.82                    | 2.02                    | 0.57                     | 0                       |
| ACS1                     | 2.25                    | 1.36                    | 0.57                     | 0                       |
| CHS3                     | 1.83                    | 1.14                    | 0.56                     | 0                       |
| EMC4                     | 1.99                    | 1.09                    | 0.56                     | 0                       |
| NUS1                     | 1.33                    | 1.05                    | 0.56                     | 0                       |
| CDC53                    | 1.4                     | 1                       | 0.55                     | 0                       |
| ATG20                    | 4.94                    | 1.96                    | 0.54                     | 0                       |
| DUG1                     | 2.68                    | 1.25                    | 0.54                     | 0                       |
| SEH1                     | 1.73                    | 1.22                    | 0.54                     | 0                       |
| OSH2                     | 1.81                    | 1.18                    | 0.54                     | 0                       |
| IFA38                    | 1.47                    | 1.14                    | 0.54                     | 0                       |
| BIM1                     | 1.47                    | 1.14                    | 0.54                     | 0                       |
| SCY1                     | 1.65                    | 1.13                    | 0.54                     | 0                       |
| TIF4632                  | 1.57                    | 1.13                    | 0.54                     | 0                       |
| MRD1                     | 1.47                    | 1.09                    | 0.54                     | 0                       |
| KCS1                     | 1.45                    | 1.06                    | 0.54                     | 0                       |
| HOP                      | 1.31                    | 1.05                    | 0.54                     | 0                       |
| APE3                     | 1.31                    | 1.05                    | 0.54                     | 0                       |
| CCZ1                     | 4.28                    | 1.57                    | 0.52                     | 0                       |
| NVJ2                     | 1.69                    | 1.14                    | 0.52                     | 0                       |
| STE20                    | 8.17                    | 2.02                    | 0.51                     | 0                       |
| FUM1                     | 2.91                    | 1.31                    | 0.51                     | 0                       |
| NUP82                    | 2.6                     | 1.16                    | 0.51                     | 0                       |
| EMP70                    | 2.59                    | 1.1                     | 0.51                     | 0                       |
| PHO8                     | 2.05                    | 1.08                    | 0.49                     | 0                       |
| PNC1                     | 6.13                    | 1.28                    | 0.45                     | 0                       |
| PMT2                     | 4.93                    | 1.24                    | 0.45                     | 0                       |

Table S2: Single affinity purification (V5/FLAG) SAINT analysis Page 4

| V5/FLAG<br>PROTEIN<br>ID | RTR1<br>V5/FLAG<br>FC_A | RTR1<br>V5/FLAG<br>FC_B | V5/FLAG<br>SAINT<br>PROB | RTR1<br>V5/FLAG<br>iREF |
|--------------------------|-------------------------|-------------------------|--------------------------|-------------------------|
| DNF2                     | 4.63                    | 1.08                    | 0.39                     | 0                       |
| CCT8                     | 2.04                    | 1.14                    | 0.37                     | 0                       |
| PFK1                     | 3                       | 1.37                    | 0.34                     | 0                       |
| SIT1                     | 11.74                   | 2.97                    | 0.33                     | 0                       |
| FUI1                     | 5.77                    | 2.3                     | 0.33                     | 0                       |
| PAF1                     | 7.81                    | 2.29                    | 0.33                     | 0                       |
| FTR1                     | 3.98                    | 2                       | 0.33                     | 0                       |
| CAB3                     | 3.62                    | 1.93                    | 0.33                     | 0                       |
| YKL063C                  | 3.39                    | 1.88                    | 0.33                     | 0                       |
| NRT1                     | 3.39                    | 1.88                    | 0.33                     | 0                       |
| THI7                     | 3.39                    | 1.88                    | 0.33                     | 0                       |
| AEP2                     | 3.3                     | 1.86                    | 0.33                     | 0                       |
| OPT1                     | 3.09                    | 1.81                    | 0.33                     | 0                       |
| SNC1                     | 6.45                    | 1.76                    | 0.33                     | 0                       |
| CTR9                     | 6.23                    | 1.67                    | 0.33                     | 0                       |
| LYP1                     | 3.59                    | 1.67                    | 0.33                     | 0                       |
| GCN3                     | 2.53                    | 1.66                    | 0.33                     | 0                       |
| PIS1                     | 2.92                    | 1.58                    | 0.33                     | 0                       |
| ERG28                    | 2.92                    | 1.58                    | 0.33                     | 0                       |
| EMC1                     | 2.92                    | 1.58                    | 0.33                     | 0                       |
| SCS7                     | 2.84                    | 1.56                    | 0.33                     | 0                       |
| FLC1                     | 2.19                    | 1.56                    | 0.33                     | 0                       |
| BAP2                     | 2.19                    | 1.56                    | 0.33                     | 0                       |
| AUS1                     | 2.19                    | 1.56                    | 0.33                     | 0                       |
| VHT1                     | 2.19                    | 1.56                    | 0.33                     | 0                       |
| MCD4                     | 2.19                    | 1.56                    | 0.33                     | 0                       |
| MUP1                     | 2.19                    | 1.56                    | 0.33                     | 0                       |
| ATP25                    | 2.09                    | 1.53                    | 0.33                     | 0                       |
| TRM8                     | 3.98                    | 1.48                    | 0.33                     | 0                       |
| NOP16                    | 1.92                    | 1.47                    | 0.33                     | 0                       |
| CPR4                     | 1.89                    | 1.46                    | 0.33                     | 0                       |
| SUR1                     | 1.89                    | 1.46                    | 0.33                     | 0                       |
| RPB6                     | 1.89                    | 1.46                    | 0.33                     | 1                       |
| ERP2                     | 1.89                    | 1.46                    | 0.33                     | 0                       |
| HSP30                    | 1.89                    | 1.46                    | 0.33                     | 0                       |
| PMC1                     | 1.89                    | 1.46                    | 0.33                     | 0                       |
| NUP192                   | 1.89                    | 1.46                    | 0.33                     | 0                       |
| EFM1                     | 1.89                    | 1.46                    | 0.33                     | 0                       |
| MNN10                    | 1.89                    | 1.46                    | 0.33                     | 0                       |
| YIF1                     | 1.87                    | 1.45                    | 0.33                     | 0                       |
| OST1                     | 2.29                    | 1.42                    | 0.33                     | 0                       |
| BUD23                    | 1.81                    | 1.42                    | 0.33                     | 0                       |
| CLA4                     | 1.81                    | 1.42                    | 0.33                     | 0                       |
| BRE5                     | 1.69                    | 1.38                    | 0.33                     | 0                       |

Table S2: Single affinity purification (V5/FLAG) SAINT analysis Page 5

| V5/FLAG<br>PROTEIN<br>ID | RTR1<br>V5/FLAG<br>FC_A | RTR1<br>V5/FLAG<br>FC_B | V5/FLAG<br>SAINT<br>PROB | RTR1<br>V5/FLAG<br>iREF |
|--------------------------|-------------------------|-------------------------|--------------------------|-------------------------|
| HRI1                     | 1.69                    | 1.38                    | 0.33                     | 0                       |
| SEG1                     | 1.69                    | 1.38                    | 0.33                     | 0                       |
| PRE10                    | 1.69                    | 1.38                    | 0.33                     | 0                       |
| RFC4                     | 1.69                    | 1.38                    | 0.33                     | 0                       |
| SEC16                    | 2.08                    | 1.36                    | 0.33                     | 0                       |
| VPS53                    | 1.65                    | 1.36                    | 0.33                     | 0                       |
| SBH1                     | 1.65                    | 1.36                    | 0.33                     | 0                       |
| TYR1                     | 1.65                    | 1.36                    | 0.33                     | 0                       |
| RCN1                     | 1.65                    | 1.36                    | 0.33                     | 0                       |
| CPR8                     | 2.02                    | 1.34                    | 0.33                     | 0                       |
| DSL1                     | 1.6                     | 1.34                    | 0.33                     | 0                       |
| GLO1                     | 1.6                     | 1.34                    | 0.33                     | 0                       |
| SPR28                    | 1.6                     | 1.34                    | 0.33                     | 0                       |
| MTC4                     | 1.6                     | 1.34                    | 0.33                     | 0                       |
| DAP2                     | 1.6                     | 1.34                    | 0.33                     | 0                       |
| PNT1                     | 1.6                     | 1.34                    | 0.33                     | 0                       |
| KTR6                     | 1.6                     | 1.34                    | 0.33                     | 0                       |
| PUS1                     | 2.71                    | 1.33                    | 0.33                     | 0                       |
| BUD27                    | 1.58                    | 1.33                    | 0.33                     | 0                       |
| AIP1                     | 1.58                    | 1.33                    | 0.33                     | 0                       |
| SSN3                     | 1.58                    | 1.33                    | 0.33                     | 0                       |
| TSR1                     | 1.58                    | 1.33                    | 0.33                     | 0                       |
| RRP46                    | 1.58                    | 1.33                    | 0.33                     | 0                       |
| RPA43                    | 6.17                    | 1.28                    | 0.33                     | 0                       |
| SDS22                    | 1.46                    | 1.28                    | 0.33                     | 0                       |
| THO1                     | 1.46                    | 1.28                    | 0.33                     | 0                       |
| CFT2                     | 1.46                    | 1.28                    | 0.33                     | 0                       |
| YNL035C                  | 1.46                    | 1.28                    | 0.33                     | 0                       |
| SGD1                     | 1.46                    | 1.28                    | 0.33                     | 0                       |
| FIG2                     | 1.46                    | 1.28                    | 0.33                     | 0                       |
| ASR1                     | 1.46                    | 1.28                    | 0.33                     | 1                       |
| ECM1                     | 2.13                    | 1.26                    | 0.33                     | 0                       |
| AIM39                    | 1.44                    | 1.26                    | 0.33                     | 0                       |
| TOP3                     | 1.44                    | 1.26                    | 0.33                     | 0                       |
| MSN5                     | 1.44                    | 1.26                    | 0.33                     | 0                       |
| OCA2                     | 1.44                    | 1.26                    | 0.33                     | 0                       |
| APM4                     | 1.44                    | 1.26                    | 0.33                     | 0                       |
| GFD2                     | 1.44                    | 1.26                    | 0.33                     | 0                       |
| POP2                     | 1.44                    | 1.26                    | 0.33                     | 0                       |
| FMP21                    | 1.44                    | 1.26                    | 0.33                     | 0                       |
| YNL115C                  | 1.44                    | 1.26                    | 0.33                     | 0                       |
| RML2                     | 1.44                    | 1.26                    | 0.33                     | 0                       |
| GYP8                     | 1.44                    | 1.26                    | 0.33                     | 0                       |
| SPC110                   | 1.44                    | 1.26                    | 0.33                     | 0                       |

Table S2: Single affinity purification (V5/FLAG) SAINT analysis Page 6

| V5/FLAG PROTEIN ID | RTR1 V5/FLAG FC_A | RTR1 V5/FLAG FC_B | V5/FLAG SAINT PROB | RTR1 V5/FLAG iREF |
|--------------------|-------------------|-------------------|--------------------|-------------------|
| CDC73              | 5.32              | 1.23              | 0.33               | 1                 |
| HCA4               | 1.66              | 1.23              | 0.33               | 0                 |
| CAR1               | 1.66              | 1.23              | 0.33               | 0                 |
| YRA2               | 1.66              | 1.23              | 0.33               | 0                 |
| MSS4               | 1.35              | 1.22              | 0.33               | 0                 |
| PIN3               | 1.35              | 1.22              | 0.33               | 0                 |
| VHS2               | 1.35              | 1.22              | 0.33               | 0                 |
| POL30              | 1.35              | 1.22              | 0.33               | 0                 |
| GRE3               | 1.35              | 1.22              | 0.33               | 0                 |
| RTT102             | 1.35              | 1.22              | 0.33               | 0                 |
| APM1               | 1.35              | 1.22              | 0.33               | 0                 |
| APL3               | 1.35              | 1.22              | 0.33               | 0                 |
| YGR169C_A          | 1.35              | 1.22              | 0.33               | 0                 |
| PBP2               | 1.35              | 1.22              | 0.33               | 0                 |
| BOI2               | 1.35              | 1.22              | 0.33               | 0                 |
| APN1               | 1.35              | 1.22              | 0.33               | 0                 |
| RTC1               | 1.35              | 1.22              | 0.33               | 0                 |
| PUS4               | 1.35              | 1.22              | 0.33               | 0                 |
| TCO89              | 1.35              | 1.22              | 0.33               | 0                 |
| TRM10              | 1.35              | 1.22              | 0.33               | 0                 |
| MET22              | 1.35              | 1.22              | 0.33               | 0                 |
| LCB5               | 1.35              | 1.22              | 0.33               | 0                 |
| IES2               | 1.35              | 1.22              | 0.33               | 0                 |
| SOL1               | 1.55              | 1.19              | 0.33               | 0                 |
| CAF20              | 5.02              | 1.18              | 0.33               | 0                 |
| NPR2               | 2.05              | 1.18              | 0.33               | 0                 |
| SUR2               | 1.52              | 1.17              | 0.33               | 0                 |
| ERV41              | 1.52              | 1.17              | 0.33               | 0                 |
| YCR087C_A          | 1.96              | 1.16              | 0.33               | 0                 |
| NOP9               | 1.45              | 1.15              | 0.33               | 0                 |
| APL5               | 1.45              | 1.15              | 0.33               | 0                 |
| UME6               | 1.23              | 1.15              | 0.33               | 0                 |
| COX17              | 1.23              | 1.15              | 0.33               | 0                 |
| DPH2               | 1.23              | 1.15              | 0.33               | 0                 |
| NPC2               | 1.23              | 1.15              | 0.33               | 0                 |
| YPL245W            | 1.23              | 1.15              | 0.33               | 0                 |
| RPB7               | 1.23              | 1.15              | 0.33               | 1                 |
| ECM16              | 1.23              | 1.15              | 0.33               | 0                 |
| KIN82              | 1.23              | 1.15              | 0.33               | 0                 |
| TMA7               | 1.23              | 1.15              | 0.33               | 0                 |
| YCL012C            | 1.23              | 1.15              | 0.33               | 0                 |
| LDB19              | 1.23              | 1.15              | 0.33               | 0                 |
| PEP3               | 1.23              | 1.15              | 0.33               | 0                 |
| ASE1               | 1.23              | 1.15              | 0.33               | 0                 |

Table S2: Single affinity purification (V5/FLAG) SAINT analysis Page 7

| V5/FLAG<br>PROTEIN<br>ID | RTR1<br>V5/FLAG<br>FC_A | RTR1<br>V5/FLAG<br>FC_B | V5/FLAG<br>SAINT<br>PROB | RTR1<br>V5/FLAG<br>iREF |
|--------------------------|-------------------------|-------------------------|--------------------------|-------------------------|
| RCM1                     | 1.23                    | 1.15                    | 0.33                     | 0                       |
| CBP2                     | 1.23                    | 1.15                    | 0.33                     | 0                       |
| YFR016C                  | 1.23                    | 1.15                    | 0.33                     | 0                       |
| FCY1                     | 1.23                    | 1.15                    | 0.33                     | 0                       |
| HAP2                     | 1.23                    | 1.15                    | 0.33                     | 0                       |
| FPK1                     | 1.23                    | 1.15                    | 0.33                     | 0                       |
| TGL5                     | 1.23                    | 1.15                    | 0.33                     | 0                       |
| YGR016W                  | 1.23                    | 1.15                    | 0.33                     | 0                       |
| DPP1                     | 1.23                    | 1.15                    | 0.33                     | 0                       |
| COQ9                     | 1.23                    | 1.15                    | 0.33                     | 0                       |
| AGP2                     | 1.23                    | 1.15                    | 0.33                     | 0                       |
| QRI1                     | 1.23                    | 1.15                    | 0.33                     | 0                       |
| YBR085C_A                | 1.23                    | 1.15                    | 0.33                     | 0                       |
| SIP3                     | 1.23                    | 1.15                    | 0.33                     | 0                       |
| NGL2                     | 1.23                    | 1.15                    | 0.33                     | 0                       |
| PIH1                     | 1.23                    | 1.15                    | 0.33                     | 0                       |
| RPN14                    | 1.23                    | 1.15                    | 0.33                     | 0                       |
| DAT1                     | 1.23                    | 1.15                    | 0.33                     | 0                       |
| VAM7                     | 1.23                    | 1.15                    | 0.33                     | 0                       |
| TPT1                     | 1.23                    | 1.15                    | 0.33                     | 0                       |
| TLG1                     | 1.23                    | 1.15                    | 0.33                     | 0                       |
| SHG1                     | 1.23                    | 1.15                    | 0.33                     | 0                       |
| APS3                     | 1.23                    | 1.15                    | 0.33                     | 0                       |
| PIN2                     | 1.23                    | 1.15                    | 0.33                     | 0                       |
| SER2                     | 1.23                    | 1.15                    | 0.33                     | 0                       |
| SIS2                     | 1.23                    | 1.15                    | 0.33                     | 0                       |
| ATO3                     | 1.23                    | 1.15                    | 0.33                     | 0                       |
| GYP5                     | 1.23                    | 1.15                    | 0.33                     | 0                       |
| MON1                     | 1.23                    | 1.15                    | 0.33                     | 0                       |
| HOS3                     | 1.23                    | 1.15                    | 0.33                     | 0                       |
| CAF16                    | 1.23                    | 1.15                    | 0.33                     | 0                       |
| CTK1                     | 1.23                    | 1.15                    | 0.33                     | 1                       |
| KAP120                   | 1.23                    | 1.15                    | 0.33                     | 0                       |
| DEP1                     | 1.23                    | 1.15                    | 0.33                     | 1                       |
| SEC6                     | 1.23                    | 1.15                    | 0.33                     | 0                       |
| URM1                     | 1.23                    | 1.15                    | 0.33                     | 0                       |
| IRC8                     | 1.23                    | 1.15                    | 0.33                     | 0                       |
| SOK1                     | 1.23                    | 1.15                    | 0.33                     | 0                       |
| KIN4                     | 1.23                    | 1.15                    | 0.33                     | 0                       |
| SPT2                     | 1.23                    | 1.15                    | 0.33                     | 0                       |
| CSR2                     | 1.23                    | 1.15                    | 0.33                     | 0                       |
| YPR117W                  | 1.23                    | 1.15                    | 0.33                     | 0                       |
| OLE1                     | 1.97                    | 1.12                    | 0.33                     | 0                       |
| CHO2                     | 1.75                    | 1.12                    | 0.33                     | 0                       |

Table S2: Single affinity purification (V5/FLAG) SAINT analysis Page 8

| V5/FLAG<br>PROTEIN<br>ID | RTR1<br>V5/FLAG<br>FC_A | RTR1<br>V5/FLAG<br>FC_B | V5/FLAG<br>SAINT<br>PROB | RTR1<br>V5/FLAG<br>iREF |
|--------------------------|-------------------------|-------------------------|--------------------------|-------------------------|
| RUD3                     | 1.77                    | 1.11                    | 0.33                     | 0                       |
| SOL2                     | 1.34                    | 1.1                     | 0.33                     | 0                       |
| NMD5                     | 1.34                    | 1.1                     | 0.33                     | 0                       |
| QNS1                     | 1.34                    | 1.1                     | 0.33                     | 0                       |
| SLK19                    | 1.34                    | 1.1                     | 0.33                     | 0                       |
| GUF1                     | 1.32                    | 1.09                    | 0.33                     | 0                       |
| YDR056C                  | 1.32                    | 1.09                    | 0.33                     | 0                       |
| APE2                     | 1.67                    | 1.08                    | 0.33                     | 0                       |
| BUL1                     | 1.58                    | 1.05                    | 0.33                     | 0                       |
| APL2                     | 1.58                    | 1.05                    | 0.33                     | 0                       |
| SLX9                     | 1.24                    | 1.05                    | 0.33                     | 0                       |
| DCP2                     | 1.24                    | 1.05                    | 0.33                     | 0                       |
| COG6                     | 1.24                    | 1.05                    | 0.33                     | 0                       |
| GAL11                    | 1.24                    | 1.05                    | 0.33                     | 0                       |
| APL6                     | 1.83                    | 1.04                    | 0.33                     | 0                       |
| DLD3                     | 1.82                    | 1.04                    | 0.33                     | 0                       |
| CDC27                    | 1.56                    | 1.04                    | 0.33                     | 0                       |
| ALG9                     | 1.56                    | 1.04                    | 0.33                     | 0                       |
| ERV46                    | 2.12                    | 1.03                    | 0.33                     | 0                       |
| MTC5                     | 2.22                    | 1.02                    | 0.33                     | 0                       |
| CLU1                     | 4.58                    | 1.01                    | 0.33                     | 0                       |
| PDR5                     | 9.05                    | 1                       | 0.33                     | 0                       |
| DMA2                     | 1.97                    | 1                       | 0.33                     | 0                       |
| PSD1                     | 1.68                    | 1                       | 0.33                     | 0                       |
| ITC1                     | 1.13                    | 1                       | 0.33                     | 0                       |
| RLF2                     | 1.13                    | 1                       | 0.33                     | 0                       |
| YHM2                     | 1.41                    | 1.03                    | 0.32                     | 0                       |
| SNL1                     | 1.36                    | 1.02                    | 0.3                      | 0                       |

Table S3: GOSTat analysis output of significant interactions in single affinity purifications Page 1

| <b>Best GOs</b><br>(Max: 30) | <b>Genes</b>                                                                          | <b>Count</b><br>22 | <b>Total</b><br>6476 | <b>p-Value</b> |
|------------------------------|---------------------------------------------------------------------------------------|--------------------|----------------------|----------------|
| <a href="#">GO:0005665</a>   | rpb12 rpb1 rpb8 rpb5 rpb2<br>rpb11 rpb3                                               | 7                  | 12                   | 5.18E-13       |
| <a href="#">GO:0000428</a>   | rpb12 rpb1 rpb8 rpb5 rpb2<br>rpb11 rpb3                                               | 7                  | 31                   | 4.14E-10       |
| <a href="#">GO:0055029</a>   | rpb12 rpb1 rpb8 rpb5 rpb2<br>rpb11 rpb3                                               | 7                  | 31                   | 4.14E-10       |
| <a href="#">GO:0030880</a>   | rpb12 rpb1 rpb8 rpb5 rpb2<br>rpb11 rpb3                                               | 7                  | 31                   | 4.14E-10       |
| <a href="#">GO:0003899</a>   | rpb12 rpb1 rpb8 rpb5 rpb2<br>rpb11 rpb3                                               | 7                  | 34                   | 6.73E-10       |
| <a href="#">GO:0016591</a>   | rpb12 rpb2 sin4 rpb3 rpb1<br>rpb8 rpb5 rpb11                                          | 8                  | 72                   | 2.70E-09       |
| <a href="#">GO:0016779</a>   | rpb12 rpb1 rpb8 rpb5 rpb2<br>rpb11 rpb3                                               | 7                  | 123                  | 5.29E-06       |
| <a href="#">GO:0044451</a>   | rpb12 rpb2 sin4 rpb3 rpb1<br>rpb8 rpb5 rpb11                                          | 8                  | 313                  | 0.00022        |
| <a href="#">GO:0005654</a>   | rpb12 rpb2 sin4 rpb3 rpb1<br>rpb8 rpb5 rpb11                                          | 8                  | 334                  | 0.000317       |
| <a href="#">GO:0016772</a>   | rpb12 rpb1 rpb5 rpb8 rpb2<br>rpb11 rpb3 ypk1                                          | 8                  | 342                  | 0.000337       |
| <a href="#">GO:0006366</a>   | rpb12 rpb2 sin4 rpb3 rpb1<br>rpb8 rpb5 rpb11                                          | 8                  | 346                  | 0.000337       |
| <a href="#">GO:0005736</a>   | rpb12 rpb8 rpb5                                                                       | 3                  | 14                   | 0.000369       |
| <a href="#">GO:0005666</a>   | rpb12 rpb8 rpb5                                                                       | 3                  | 17                   | 0.000563       |
| <a href="#">GO:0032991</a>   | rpb12 enp1 rpl33a rpb2 vtc4<br>vma8 sin4 rpb3 ecm29 idh2<br>rpb1 dhh1 rpb5 rpb8 rpb11 | 15                 | 1705                 | 0.000563       |
| <a href="#">GO:0043233</a>   | rpb12 enp1 rpb2 sin4 rpb3<br>idh2 rpb1 rpb8 rpb5 rpb11<br>cym1                        | 11                 | 824                  | 0.000563       |
| <a href="#">GO:0031974</a>   | rpb12 enp1 rpb2 sin4 rpb3<br>idh2 rpb1 rpb8 rpb5 rpb11<br>cym1                        | 11                 | 824                  | 0.000563       |
| <a href="#">GO:0043234</a>   | rpb12 rpb2 vtc4 vma8 sin4<br>rpb3 ecm29 idh2 rpb1 dhh1<br>rpb5 rpb8 rpb11             | 13                 | 1225                 | 0.000727       |
| <a href="#">GO:0031981</a>   | rpb12 enp1 rpb2 sin4 rpb3<br>rpb1 rpb8 rpb5 rpb11                                     | 9                  | 611                  | 0.00183        |
| <a href="#">GO:0006351</a>   | rpb12 rpb2 sin4 rpb3 rpb1<br>rpb8 rpb5 rpb11                                          | 8                  | 523                  | 0.00362        |
| <a href="#">GO:0032774</a>   | rpb12 rpb2 sin4 rpb3 rpb1<br>rpb8 rpb5 rpb11                                          | 8                  | 525                  | 0.00362        |
| <a href="#">GO:0006360</a>   | rpb12 rpb8 rpb5                                                                       | 3                  | 35                   | 0.00362        |
| <a href="#">GO:0006383</a>   | rpb12 rpb8 rpb5                                                                       | 3                  | 38                   | 0.00442        |



Table S3: GOSTat analysis output of significant interactions in single affinity purifications Page 2

| <b>Best GOs</b><br>(Max: 30) | <b>Genes</b>                                                                              | <b>Count</b><br>22 | <b>Total</b><br>6476 | <b>p-Value</b> |
|------------------------------|-------------------------------------------------------------------------------------------|--------------------|----------------------|----------------|
| <a href="#">GO:0006350</a>   | rpb12 rpb2 sin4 rpb3 rpb1<br>rpb8 rpb5 rpb11                                              | 8                  | 568                  | 0.00559        |
| <a href="#">GO:0016070</a>   | rpb12 enp1 rpb2 sin4 rpb3<br>rpb1 dhh1 rpb8 rpb5 rpb11                                    | 10                 | 1056                 | 0.0191         |
| <a href="#">GO:0016740</a>   | rpb12 rpb1 rpb5 rpb8 rpb2<br>rpb11 rpb3 ypk1                                              | 8                  | 703                  | 0.0216         |
| <a href="#">GO:0044452</a>   | rpb12 enp1 rpb8 rpb5                                                                      | 4                  | 182                  | 0.0392         |
| <a href="#">GO:0044446</a>   | rpb12 enp1 rpl33a rpb2 vtc4<br>vma8 sin4 rpb3 idh2 rpb1<br>rvs167 rpb5 rpb8 rpb11<br>cym1 | 15                 | 2309                 | 0.0392         |
| <a href="#">GO:0044422</a>   | rpb12 enp1 rpl33a rpb2 vtc4<br>vma8 sin4 rpb3 idh2 rpb1<br>rvs167 rpb5 rpb8 rpb11<br>cym1 | 15                 | 2309                 | 0.0392         |
| <a href="#">GO:0004729</a>   | <a href="#">hem14</a>                                                                     | 1                  | 1                    | 0.0429         |
| <a href="#">GO:0010324</a>   | rvs167 vtc4 ypk1                                                                          | 3                  | 96                   | 0.0483         |

Table S4: FLAG affinity purification SAINT analysis PAGE 1

| RTR1 FLAG<br>PROTEIN ID | RTR1<br>FLAG<br>FC_A | RTR1<br>FLAG<br>FC_B | RTR1 FLAG<br>SAINT PROB | RTR1<br>FLAG<br>iREF |
|-------------------------|----------------------|----------------------|-------------------------|----------------------|
| RTR1                    | 260.61               | 155.33               | 1                       | 1                    |
| PHO84                   | 118.6                | 52.33                | 1                       | 0                    |
| RPB3                    | 28.16                | 22.56                | 1                       | 1                    |
| RPO21                   | 25.76                | 13.53                | 1                       | 1                    |
| RPB8                    | 12.94                | 11.63                | 1                       | 1                    |
| TAP42                   | 17.95                | 10.68                | 1                       | 0                    |
| RPB2                    | 17.62                | 10.13                | 1                       | 1                    |
| RPB5                    | 12.86                | 8                    | 1                       | 1                    |
| RPC10                   | 13.69                | 6.5                  | 1                       | 1                    |
| ERV25                   | 9.25                 | 5.83                 | 1                       | 0                    |
| DIP5                    | 7.78                 | 5.3                  | 1                       | 0                    |
| PFK26                   | 6.53                 | 2.87                 | 1                       | 0                    |
| DRS2                    | 3.75                 | 2.72                 | 1                       | 0                    |
| CAR2                    | 4.45                 | 2.65                 | 1                       | 0                    |
| TLG2                    | 3.53                 | 2.25                 | 1                       | 0                    |
| FOL2                    | 9.8                  | 4.12                 | 0.99                    | 0                    |
| SYN8                    | 4.01                 | 3.13                 | 0.99                    | 0                    |
| ARO9                    | 4.33                 | 2.92                 | 0.99                    | 0                    |
| TVP18                   | 9.85                 | 5.52                 | 0.98                    | 0                    |
| TRR1                    | 3.71                 | 3.1                  | 0.98                    | 0                    |
| AQR1                    | 3.58                 | 3.04                 | 0.98                    | 0                    |
| RPB11                   | 2.76                 | 2.76                 | 0.98                    | 1                    |
| PPN1                    | 2.41                 | 2.38                 | 0.98                    | 0                    |
| TAL1                    | 2.75                 | 1.37                 | 0.98                    | 0                    |
| PEP12                   | 4.19                 | 3.25                 | 0.97                    | 0                    |
| ECM32                   | 2.24                 | 2.17                 | 0.97                    | 0                    |
| SRP1                    | 3.04                 | 1.94                 | 0.92                    | 0                    |
| YIP4                    | 2.95                 | 1.83                 | 0.9                     | 0                    |
| STE2                    | 2.37                 | 1.13                 | 0.9                     | 0                    |
| NHX1                    | 3.86                 | 2.93                 | 0.89                    | 0                    |
| CYM1                    | 3.41                 | 2.71                 | 0.89                    | 0                    |
| GNP1                    | 3.81                 | 2.48                 | 0.89                    | 0                    |
| GRX1                    | 2.48                 | 2.41                 | 0.89                    | 0                    |
| KRE9                    | 1.97                 | 1.96                 | 0.89                    | 0                    |
| FRD1                    | 2.54                 | 1.96                 | 0.89                    | 0                    |
| RCR1                    | 2.07                 | 1.94                 | 0.88                    | 0                    |
| SRB8                    | 1.79                 | 1.79                 | 0.88                    | 0                    |
| SIN4                    | 1.79                 | 1.79                 | 0.88                    | 0                    |
| GEF1                    | 1.79                 | 1.79                 | 0.88                    | 0                    |
| ERG20                   | 2.4                  | 1.57                 | 0.85                    | 0                    |
| OYE2                    | 2.26                 | 1.36                 | 0.84                    | 0                    |
| YNR065C                 | 5.93                 | 2.94                 | 0.83                    | 0                    |
| FAA4                    | 2.35                 | 1.26                 | 0.83                    | 0                    |

Table S4: FLAG affinity purification SAINT analysis PAGE 2

| RTR1 FLAG<br>PROTEIN ID | RTR1<br>FLAG<br>FC_A | RTR1<br>FLAG<br>FC_B | RTR1 FLAG<br>SAINT PROB | RTR1<br>FLAG<br>iREF |
|-------------------------|----------------------|----------------------|-------------------------|----------------------|
| LEO1                    | 9.29                 | 4.9                  | 0.82                    | 0                    |
| DUG1                    | 3.56                 | 2.77                 | 0.82                    | 0                    |
| ARD1                    | 3.14                 | 2.26                 | 0.82                    | 0                    |
| YLR241W                 | 4.46                 | 2.39                 | 0.81                    | 0                    |
| BMS1                    | 2.87                 | 2.19                 | 0.81                    | 0                    |
| FET4                    | 5.71                 | 2.05                 | 0.81                    | 0                    |
| UTR1                    | 1.65                 | 1.48                 | 0.8                     | 0                    |
| VTC4                    | 5.72                 | 2.47                 | 0.79                    | 0                    |
| AAP1                    | 1.84                 | 1.44                 | 0.79                    | 0                    |
| GDE1                    | 6.81                 | 3.67                 | 0.76                    | 0                    |
| ENP1                    | 6.84                 | 3.39                 | 0.76                    | 0                    |
| FCY2                    | 10.92                | 3.63                 | 0.75                    | 0                    |
| CHS1                    | 2.49                 | 1.5                  | 0.73                    | 0                    |
| SKN1                    | 2.12                 | 1.21                 | 0.73                    | 0                    |
| ATG20                   | 7                    | 3.55                 | 0.72                    | 0                    |
| SEH1                    | 2.18                 | 1.69                 | 0.72                    | 0                    |
| ECM29                   | 1.99                 | 1.21                 | 0.72                    | 0                    |
| RFC3                    | 1.68                 | 1.08                 | 0.72                    | 0                    |
| TSA2                    | 3.95                 | 2.12                 | 0.71                    | 0                    |
| UTP22                   | 2.04                 | 1.39                 | 0.7                     | 0                    |
| YLR413W                 | 4.85                 | 2.05                 | 0.69                    | 0                    |
| SCY1                    | 2.07                 | 1.48                 | 0.69                    | 0                    |
| CHS3                    | 2.34                 | 1.54                 | 0.68                    | 0                    |
| ENA1                    | 2.34                 | 1.36                 | 0.68                    | 0                    |
| ALD6                    | 2.51                 | 1.32                 | 0.68                    | 0                    |
| CCZ1                    | 6.04                 | 2.57                 | 0.66                    | 0                    |
| HOP                     | 1.53                 | 1.28                 | 0.66                    | 0                    |
| APE3                    | 1.53                 | 1.28                 | 0.66                    | 0                    |
| RPT6                    | 2.06                 | 1.13                 | 0.66                    | 0                    |
| IDH1                    | 2.03                 | 1.06                 | 0.66                    | 0                    |
| RVS167                  | 3.74                 | 1.54                 | 0.65                    | 0                    |
| PHO90                   | 1.87                 | 1.24                 | 0.65                    | 0                    |
| YDL124W                 | 1.87                 | 1.42                 | 0.64                    | 0                    |
| VTI1                    | 1.96                 | 1.09                 | 0.64                    | 0                    |
| VTC3                    | 8.99                 | 2.59                 | 0.62                    | 0                    |
| ENO2                    | 3.14                 | 1.83                 | 0.62                    | 0                    |
| GDI1                    | 1.94                 | 1.16                 | 0.62                    | 0                    |
| FUM1                    | 4.07                 | 2.29                 | 0.6                     | 0                    |
| CHC1                    | 2.88                 | 1.66                 | 0.59                    | 0                    |
| KRE6                    | 2.68                 | 1.26                 | 0.59                    | 0                    |
| EMP70                   | 3.6                  | 1.73                 | 0.58                    | 0                    |
| KRI1                    | 1.86                 | 1.2                  | 0.57                    | 0                    |
| RFC2                    | 1.59                 | 1.17                 | 0.57                    | 0                    |

Table S4: FLAG affinity purification SAINT analysis PAGE 3

| RTR1 FLAG<br>PROTEIN ID | RTR1<br>FLAG<br>FC_A | RTR1<br>FLAG<br>FC_B | RTR1 FLAG<br>SAINT PROB | RTR1<br>FLAG<br>iREF |
|-------------------------|----------------------|----------------------|-------------------------|----------------------|
| MDN1                    | 2.11                 | 1.08                 | 0.55                    | 0                    |
| VPS13                   | 3.43                 | 1.88                 | 0.54                    | 0                    |
| KGD2                    | 2.6                  | 1.24                 | 0.54                    | 0                    |
| LCD1                    | 7.57                 | 3.78                 | 0.53                    | 0                    |
| HOR2                    | 4.9                  | 2.12                 | 0.53                    | 0                    |
| YGL039W                 | 3.35                 | 1.42                 | 0.53                    | 0                    |
| MMF1                    | 2.79                 | 1.52                 | 0.52                    | 0                    |
| TMA19                   | 4.53                 | 2.5                  | 0.51                    | 0                    |
| NPA3                    | 6.15                 | 1.85                 | 0.51                    | 1                    |
| APT1                    | 1.81                 | 1.17                 | 0.51                    | 0                    |
| SIT1                    | 17.11                | 5.76                 | 0.5                     | 0                    |
| PAF1                    | 11.26                | 4.04                 | 0.5                     | 0                    |
| FUI1                    | 8.16                 | 3.91                 | 0.5                     | 0                    |
| FBA1                    | 4.85                 | 3.24                 | 0.5                     | 0                    |
| FTR1                    | 5.47                 | 3.15                 | 0.5                     | 0                    |
| STE20                   | 11.63                | 3.04                 | 0.5                     | 0                    |
| PDS5                    | 14.82                | 2.99                 | 0.5                     | 0                    |
| SNC1                    | 9.29                 | 2.93                 | 0.5                     | 0                    |
| YKL063C                 | 4.58                 | 2.86                 | 0.5                     | 0                    |
| NRT1                    | 4.58                 | 2.86                 | 0.5                     | 0                    |
| THI7                    | 4.58                 | 2.86                 | 0.5                     | 0                    |
| AEP2                    | 4.45                 | 2.81                 | 0.5                     | 0                    |
| CTR9                    | 8.96                 | 2.76                 | 0.5                     | 0                    |
| OPT1                    | 4.13                 | 2.7                  | 0.5                     | 0                    |
| SMT3                    | 7.52                 | 2.53                 | 0.5                     | 0                    |
| LYP1                    | 4.94                 | 2.52                 | 0.5                     | 0                    |
| MEC1                    | 5.22                 | 2.37                 | 0.5                     | 0                    |
| RFA3                    | 7.13                 | 2.31                 | 0.5                     | 0                    |
| RPA49                   | 7.16                 | 2.27                 | 0.5                     | 0                    |
| TRM8                    | 5.57                 | 2.24                 | 0.5                     | 0                    |
| SCS7                    | 3.8                  | 2.24                 | 0.5                     | 0                    |
| FLC1                    | 2.79                 | 2.14                 | 0.5                     | 0                    |
| BAP2                    | 2.79                 | 2.14                 | 0.5                     | 0                    |
| AUS1                    | 2.79                 | 2.14                 | 0.5                     | 0                    |
| VHT1                    | 2.79                 | 2.14                 | 0.5                     | 0                    |
| MCD4                    | 2.79                 | 2.14                 | 0.5                     | 0                    |
| MUP1                    | 2.79                 | 2.14                 | 0.5                     | 0                    |
| RPA43                   | 8.97                 | 2.12                 | 0.5                     | 0                    |
| CDC73                   | 7.71                 | 2.01                 | 0.5                     | 1                    |
| LSB3                    | 4.63                 | 1.97                 | 0.5                     | 0                    |
| KSP1                    | 7.72                 | 1.95                 | 0.5                     | 0                    |
| OST1                    | 2.98                 | 1.94                 | 0.5                     | 0                    |
| NOP16                   | 2.38                 | 1.94                 | 0.5                     | 0                    |

Table S4: FLAG affinity purification SAINT analysis PAGE 4

| RTR1 FLAG<br>PROTEIN ID | RTR1<br>FLAG<br>FC_A | RTR1<br>FLAG<br>FC_B | RTR1 FLAG<br>SAINT PROB | RTR1<br>FLAG<br>iREF |
|-------------------------|----------------------|----------------------|-------------------------|----------------------|
| RPO26                   | 2.34                 | 1.92                 | 0.5                     | 1                    |
| AAD14                   | 2.34                 | 1.92                 | 0.5                     | 0                    |
| CPR4                    | 2.34                 | 1.92                 | 0.5                     | 0                    |
| SUR1                    | 2.34                 | 1.92                 | 0.5                     | 0                    |
| ERP2                    | 2.34                 | 1.92                 | 0.5                     | 0                    |
| HSP30                   | 2.34                 | 1.92                 | 0.5                     | 0                    |
| PDR5                    | 13.31                | 1.92                 | 0.5                     | 0                    |
| PMC1                    | 2.34                 | 1.92                 | 0.5                     | 0                    |
| NUP192                  | 2.34                 | 1.92                 | 0.5                     | 0                    |
| EFM1                    | 2.34                 | 1.92                 | 0.5                     | 0                    |
| MNN10                   | 2.34                 | 1.92                 | 0.5                     | 0                    |
| CAF20                   | 7.26                 | 1.89                 | 0.5                     | 0                    |
| PUS1                    | 3.66                 | 1.86                 | 0.5                     | 0                    |
| PFK1                    | 3.52                 | 1.86                 | 0.5                     | 0                    |
| BUD23                   | 2.21                 | 1.85                 | 0.5                     | 0                    |
| CLA4                    | 2.21                 | 1.85                 | 0.5                     | 0                    |
| DBP9                    | 2.21                 | 1.85                 | 0.5                     | 0                    |
| TRA1                    | 2.21                 | 1.85                 | 0.5                     | 0                    |
| RKR1                    | 7.9                  | 1.83                 | 0.5                     | 0                    |
| PNC1                    | 8.65                 | 1.83                 | 0.5                     | 0                    |
| DNF2                    | 6.68                 | 1.82                 | 0.5                     | 0                    |
| SEC16                   | 2.66                 | 1.82                 | 0.5                     | 0                    |
| CPR8                    | 2.56                 | 1.78                 | 0.5                     | 0                    |
| EAP1                    | 2.51                 | 1.76                 | 0.5                     | 0                    |
| BRE5                    | 2.04                 | 1.75                 | 0.5                     | 0                    |
| RCL1                    | 2.04                 | 1.75                 | 0.5                     | 0                    |
| FPR3                    | 5.12                 | 1.75                 | 0.5                     | 0                    |
| HRI1                    | 2.04                 | 1.75                 | 0.5                     | 0                    |
| SEG1                    | 2.04                 | 1.75                 | 0.5                     | 0                    |
| PRE10                   | 2.04                 | 1.75                 | 0.5                     | 0                    |
| RFC4                    | 2.04                 | 1.75                 | 0.5                     | 0                    |
| PHO81                   | 2.04                 | 1.75                 | 0.5                     | 0                    |
| HXK2                    | 2.55                 | 1.73                 | 0.5                     | 0                    |
| GND2                    | 7.64                 | 1.7                  | 0.5                     | 0                    |
| RPL12B                  | 2.36                 | 1.69                 | 0.5                     | 0                    |
| UBA4                    | 3.46                 | 1.68                 | 0.5                     | 0                    |
| ECM1                    | 2.77                 | 1.67                 | 0.5                     | 0                    |
| BUD27                   | 1.86                 | 1.65                 | 0.5                     | 0                    |
| AIP1                    | 1.86                 | 1.65                 | 0.5                     | 0                    |
| PUF4                    | 1.86                 | 1.65                 | 0.5                     | 0                    |
| TSR1                    | 1.86                 | 1.65                 | 0.5                     | 0                    |
| DBP3                    | 6.48                 | 1.65                 | 0.5                     | 0                    |
| SSN3                    | 1.86                 | 1.65                 | 0.5                     | 0                    |

Table S4: FLAG affinity purification SAINT analysis PAGE 5

| RTR1 FLAG<br>PROTEIN ID | RTR1<br>FLAG<br>FC_A | RTR1<br>FLAG<br>FC_B | RTR1 FLAG<br>SAINT PROB | RTR1<br>FLAG<br>iREF |
|-------------------------|----------------------|----------------------|-------------------------|----------------------|
| RRP46                   | 1.86                 | 1.65                 | 0.5                     | 0                    |
| PFK2                    | 3.9                  | 1.64                 | 0.5                     | 0                    |
| HMF1                    | 2.19                 | 1.62                 | 0.5                     | 0                    |
| FKS1                    | 9.45                 | 1.57                 | 0.5                     | 0                    |
| NPR2                    | 2.66                 | 1.55                 | 0.5                     | 0                    |
| ASR1                    | 1.69                 | 1.54                 | 0.5                     | 1                    |
| SSP1                    | 4.16                 | 1.54                 | 0.5                     | 0                    |
| YLR179C                 | 1.69                 | 1.54                 | 0.5                     | 0                    |
| SDS22                   | 1.69                 | 1.54                 | 0.5                     | 0                    |
| HCA4                    | 2.03                 | 1.54                 | 0.5                     | 0                    |
| THO1                    | 1.69                 | 1.54                 | 0.5                     | 0                    |
| ESF1                    | 1.69                 | 1.54                 | 0.5                     | 0                    |
| PRE2                    | 1.69                 | 1.54                 | 0.5                     | 0                    |
| CFT2                    | 1.69                 | 1.54                 | 0.5                     | 0                    |
| YNL035C                 | 1.69                 | 1.54                 | 0.5                     | 0                    |
| SGD1                    | 1.69                 | 1.54                 | 0.5                     | 0                    |
| FIG2                    | 1.69                 | 1.54                 | 0.5                     | 0                    |
| UBI4                    | 4.84                 | 1.53                 | 0.5                     | 1                    |
| CAR1                    | 2.03                 | 1.53                 | 0.5                     | 0                    |
| YRA2                    | 2.03                 | 1.53                 | 0.5                     | 0                    |
| RHR2                    | 2.94                 | 1.52                 | 0.5                     | 0                    |
| RPS20                   | 3.12                 | 1.52                 | 0.5                     | 0                    |
| YCR087C_A               | 2.52                 | 1.5                  | 0.5                     | 0                    |
| PTR2                    | 8.25                 | 1.46                 | 0.5                     | 0                    |
| SOL1                    | 1.87                 | 1.45                 | 0.5                     | 0                    |
| MAK5                    | 2.38                 | 1.45                 | 0.5                     | 0                    |
| CLU1                    | 6.39                 | 1.44                 | 0.5                     | 0                    |
| MSS4                    | 1.52                 | 1.43                 | 0.5                     | 0                    |
| VHS2                    | 1.52                 | 1.43                 | 0.5                     | 0                    |
| POL30                   | 1.52                 | 1.43                 | 0.5                     | 0                    |
| RTT102                  | 1.52                 | 1.43                 | 0.5                     | 0                    |
| APM1                    | 1.52                 | 1.43                 | 0.5                     | 0                    |
| APL3                    | 1.52                 | 1.43                 | 0.5                     | 0                    |
| YGR169C_A               | 1.52                 | 1.43                 | 0.5                     | 0                    |
| LCB5                    | 1.52                 | 1.43                 | 0.5                     | 0                    |
| PBP2                    | 1.52                 | 1.43                 | 0.5                     | 0                    |
| BOI2                    | 1.52                 | 1.43                 | 0.5                     | 0                    |
| APN1                    | 1.52                 | 1.43                 | 0.5                     | 0                    |
| RTC1                    | 1.52                 | 1.43                 | 0.5                     | 0                    |
| PUS4                    | 1.52                 | 1.43                 | 0.5                     | 0                    |
| TCO89                   | 1.52                 | 1.43                 | 0.5                     | 0                    |
| TRM10                   | 1.52                 | 1.43                 | 0.5                     | 0                    |
| PIN3                    | 1.52                 | 1.43                 | 0.5                     | 0                    |

Table S4: FLAG affinity purification SAINT analysis PAGE 6

| RTR1 FLAG<br>PROTEIN ID | RTR1<br>FLAG<br>FC_A | RTR1<br>FLAG<br>FC_B | RTR1 FLAG<br>SAINT PROB | RTR1<br>FLAG<br>iREF |
|-------------------------|----------------------|----------------------|-------------------------|----------------------|
| MET22                   | 1.52                 | 1.43                 | 0.5                     | 0                    |
| GRE3                    | 1.52                 | 1.43                 | 0.5                     | 0                    |
| YBR238C                 | 1.52                 | 1.43                 | 0.5                     | 0                    |
| IES2                    | 1.52                 | 1.43                 | 0.5                     | 0                    |
| YPR097W                 | 1.52                 | 1.43                 | 0.5                     | 0                    |
| TSA1                    | 2.54                 | 1.4                  | 0.5                     | 0                    |
| RUD3                    | 2.24                 | 1.4                  | 0.5                     | 0                    |
| GND1                    | 2.74                 | 1.39                 | 0.5                     | 0                    |
| APL5                    | 1.72                 | 1.38                 | 0.5                     | 0                    |
| LYS9                    | 1.72                 | 1.38                 | 0.5                     | 0                    |
| NOP9                    | 1.71                 | 1.37                 | 0.5                     | 0                    |
| MTC5                    | 2.98                 | 1.36                 | 0.5                     | 0                    |
| STE6                    | 4.17                 | 1.35                 | 0.5                     | 0                    |
| RFA1                    | 5.24                 | 1.34                 | 0.5                     | 0                    |
| APE2                    | 2.1                  | 1.34                 | 0.5                     | 0                    |
| APL6                    | 2.36                 | 1.33                 | 0.5                     | 0                    |
| DLD3                    | 2.35                 | 1.32                 | 0.5                     | 0                    |
| BUL1                    | 1.96                 | 1.29                 | 0.5                     | 0                    |
| APL2                    | 1.96                 | 1.29                 | 0.5                     | 0                    |
| KRE2                    | 3.89                 | 1.29                 | 0.5                     | 0                    |
| SOL2                    | 1.55                 | 1.28                 | 0.5                     | 0                    |
| NMD5                    | 1.55                 | 1.28                 | 0.5                     | 0                    |
| APL4                    | 1.55                 | 1.28                 | 0.5                     | 0                    |
| QNS1                    | 1.55                 | 1.28                 | 0.5                     | 0                    |
| SLK19                   | 1.55                 | 1.28                 | 0.5                     | 0                    |
| CPS1                    | 4.08                 | 1.25                 | 0.5                     | 0                    |
| CDC16                   | 2.59                 | 1.23                 | 0.5                     | 0                    |
| GSC2                    | 12.14                | 1.21                 | 0.5                     | 0                    |
| ITR1                    | 3.41                 | 1.21                 | 0.5                     | 0                    |
| RPC19                   | 2.15                 | 1.21                 | 0.5                     | 0                    |
| DCP2                    | 1.4                  | 1.19                 | 0.5                     | 0                    |
| JNM1                    | 1.96                 | 1.19                 | 0.5                     | 0                    |
| CPR5                    | 1.4                  | 1.18                 | 0.5                     | 0                    |
| SLX9                    | 1.4                  | 1.18                 | 0.5                     | 0                    |
| REX4                    | 1.4                  | 1.18                 | 0.5                     | 0                    |
| COG6                    | 1.4                  | 1.18                 | 0.5                     | 0                    |
| GAL11                   | 1.4                  | 1.18                 | 0.5                     | 0                    |
| STH1                    | 2.29                 | 1.17                 | 0.5                     | 0                    |
| SKI3                    | 1.67                 | 1.16                 | 0.5                     | 0                    |
| TIF4632                 | 1.67                 | 1.16                 | 0.5                     | 0                    |
| SLA1                    | 2.47                 | 1.15                 | 0.5                     | 0                    |
| MNN5                    | 4.03                 | 1.15                 | 0.5                     | 0                    |
| YRA1                    | 5.1                  | 1.14                 | 0.5                     | 0                    |

Table S4: FLAG affinity purification SAINT analysis PAGE 7

| RTR1 FLAG<br>PROTEIN ID | RTR1<br>FLAG<br>FC_A | RTR1<br>FLAG<br>FC_B | RTR1 FLAG<br>SAINT PROB | RTR1<br>FLAG<br>iREF |
|-------------------------|----------------------|----------------------|-------------------------|----------------------|
| CHD1                    | 1.82                 | 1.13                 | 0.5                     | 0                    |
| REX2                    | 1.82                 | 1.13                 | 0.5                     | 0                    |
| BBC1                    | 3.17                 | 1.13                 | 0.5                     | 0                    |
| SET2                    | 2.14                 | 1.12                 | 0.5                     | 1                    |
| CHS5                    | 2.14                 | 1.12                 | 0.5                     | 0                    |
| ADH3                    | 6.26                 | 1.11                 | 0.5                     | 0                    |
| BUD20                   | 1.84                 | 1.1                  | 0.5                     | 0                    |
| PRO2                    | 1.96                 | 1.1                  | 0.5                     | 0                    |
| MET4                    | 1.53                 | 1.09                 | 0.5                     | 0                    |
| COQ1                    | 1.53                 | 1.09                 | 0.5                     | 0                    |
| VPS5                    | 1.53                 | 1.09                 | 0.5                     | 0                    |
| MRD1                    | 1.53                 | 1.09                 | 0.5                     | 0                    |
| STU1                    | 1.53                 | 1.09                 | 0.5                     | 0                    |
| PEP1                    | 2.52                 | 1.08                 | 0.5                     | 0                    |
| CDC19                   | 2.05                 | 1.06                 | 0.5                     | 0                    |
| THI20                   | 6.71                 | 1.04                 | 0.5                     | 0                    |
| GCD11                   | 1.82                 | 1.01                 | 0.5                     | 0                    |
| OLE1                    | 2.57                 | 1.45                 | 0.49                    | 0                    |
| SSA3                    | 2.33                 | 1.34                 | 0.49                    | 0                    |
| TEF4                    | 2.31                 | 1.34                 | 0.49                    | 0                    |
| DNF1                    | 3.21                 | 1.18                 | 0.49                    | 0                    |
| ADH1                    | 1.76                 | 1.17                 | 0.49                    | 0                    |
| KEL3                    | 1.39                 | 1.02                 | 0.49                    | 0                    |
| GCN1                    | 1.77                 | 1.01                 | 0.49                    | 0                    |
| GLO1                    | 1.89                 | 1.67                 | 0.48                    | 0                    |
| SPR28                   | 1.89                 | 1.67                 | 0.48                    | 0                    |
| DSL1                    | 1.89                 | 1.67                 | 0.48                    | 0                    |
| MTC4                    | 1.89                 | 1.67                 | 0.48                    | 0                    |
| DAP2                    | 1.89                 | 1.67                 | 0.48                    | 0                    |
| PNT1                    | 1.89                 | 1.67                 | 0.48                    | 0                    |
| KTR6                    | 1.89                 | 1.67                 | 0.48                    | 0                    |
| HSP42                   | 1.74                 | 1.39                 | 0.48                    | 0                    |
| RPB7                    | 1.35                 | 1.3                  | 0.48                    | 1                    |
| CTK1                    | 1.35                 | 1.3                  | 0.48                    | 1                    |
| DEP1                    | 1.35                 | 1.3                  | 0.48                    | 1                    |
| UME6                    | 1.35                 | 1.3                  | 0.48                    | 0                    |
| YMR027W                 | 1.35                 | 1.3                  | 0.48                    | 0                    |
| COX17                   | 1.35                 | 1.3                  | 0.48                    | 0                    |
| DPH2                    | 1.35                 | 1.3                  | 0.48                    | 0                    |
| NPC2                    | 1.35                 | 1.3                  | 0.48                    | 0                    |
| YPL245W                 | 1.35                 | 1.3                  | 0.48                    | 0                    |
| KIN82                   | 1.35                 | 1.3                  | 0.48                    | 0                    |
| TMA7                    | 1.35                 | 1.3                  | 0.48                    | 0                    |



Table S4: FLAG affinity purification SAINT analysis PAGE 8

| RTR1 FLAG<br>PROTEIN ID | RTR1<br>FLAG<br>FC_A | RTR1<br>FLAG<br>FC_B | RTR1 FLAG<br>SAINT PROB | RTR1<br>FLAG<br>iREF |
|-------------------------|----------------------|----------------------|-------------------------|----------------------|
| YCL012C                 | 1.35                 | 1.3                  | 0.48                    | 0                    |
| LDB19                   | 1.35                 | 1.3                  | 0.48                    | 0                    |
| UBC4                    | 1.35                 | 1.3                  | 0.48                    | 0                    |
| PEP3                    | 1.35                 | 1.3                  | 0.48                    | 0                    |
| ASE1                    | 1.35                 | 1.3                  | 0.48                    | 0                    |
| RCM1                    | 1.35                 | 1.3                  | 0.48                    | 0                    |
| CBP2                    | 1.35                 | 1.3                  | 0.48                    | 0                    |
| SWI6                    | 1.35                 | 1.3                  | 0.48                    | 0                    |
| YFR016C                 | 1.35                 | 1.3                  | 0.48                    | 0                    |
| SPT2                    | 1.35                 | 1.3                  | 0.48                    | 0                    |
| MDM38                   | 1.35                 | 1.3                  | 0.48                    | 0                    |
| ECM16                   | 1.35                 | 1.3                  | 0.48                    | 0                    |
| FCY1                    | 1.35                 | 1.3                  | 0.48                    | 0                    |
| HAP2                    | 1.35                 | 1.3                  | 0.48                    | 0                    |
| FPK1                    | 1.35                 | 1.3                  | 0.48                    | 0                    |
| TGL5                    | 1.35                 | 1.3                  | 0.48                    | 0                    |
| YGR016W                 | 1.35                 | 1.3                  | 0.48                    | 0                    |
| DPP1                    | 1.35                 | 1.3                  | 0.48                    | 0                    |
| COQ9                    | 1.35                 | 1.3                  | 0.48                    | 0                    |
| AGP2                    | 1.35                 | 1.3                  | 0.48                    | 0                    |
| QRI1                    | 1.35                 | 1.3                  | 0.48                    | 0                    |
| YBR085C_A               | 1.35                 | 1.3                  | 0.48                    | 0                    |
| SIP3                    | 1.35                 | 1.3                  | 0.48                    | 0                    |
| NGL2                    | 1.35                 | 1.3                  | 0.48                    | 0                    |
| URM1                    | 1.35                 | 1.3                  | 0.48                    | 0                    |
| PIH1                    | 1.35                 | 1.3                  | 0.48                    | 0                    |
| RPN14                   | 1.35                 | 1.3                  | 0.48                    | 0                    |
| DAT1                    | 1.35                 | 1.3                  | 0.48                    | 0                    |
| VAM7                    | 1.35                 | 1.3                  | 0.48                    | 0                    |
| TPT1                    | 1.35                 | 1.3                  | 0.48                    | 0                    |
| YPR089W                 | 1.35                 | 1.3                  | 0.48                    | 0                    |
| TLG1                    | 1.35                 | 1.3                  | 0.48                    | 0                    |
| URA1                    | 1.35                 | 1.3                  | 0.48                    | 0                    |
| SHG1                    | 1.35                 | 1.3                  | 0.48                    | 0                    |
| APS3                    | 1.35                 | 1.3                  | 0.48                    | 0                    |
| PIN2                    | 1.35                 | 1.3                  | 0.48                    | 0                    |
| COG4                    | 1.35                 | 1.3                  | 0.48                    | 0                    |
| SER2                    | 1.35                 | 1.3                  | 0.48                    | 0                    |
| SIS2                    | 1.35                 | 1.3                  | 0.48                    | 0                    |
| ATO3                    | 1.35                 | 1.3                  | 0.48                    | 0                    |
| GYP5                    | 1.35                 | 1.3                  | 0.48                    | 0                    |
| MON1                    | 1.35                 | 1.3                  | 0.48                    | 0                    |
| HOS3                    | 1.35                 | 1.3                  | 0.48                    | 0                    |

Table S4: FLAG affinity purification SAINT analysis PAGE 9

| RTR1 FLAG<br>PROTEIN ID | RTR1<br>FLAG<br>FC_A | RTR1<br>FLAG<br>FC_B | RTR1 FLAG<br>SAINT PROB | RTR1<br>FLAG<br>iREF |
|-------------------------|----------------------|----------------------|-------------------------|----------------------|
| CAF16                   | 1.35                 | 1.3                  | 0.48                    | 0                    |
| ACB1                    | 1.35                 | 1.3                  | 0.48                    | 0                    |
| KAP120                  | 1.35                 | 1.3                  | 0.48                    | 0                    |
| SEC6                    | 1.35                 | 1.3                  | 0.48                    | 0                    |
| SEC8                    | 1.35                 | 1.3                  | 0.48                    | 0                    |
| IRC8                    | 1.35                 | 1.3                  | 0.48                    | 0                    |
| SOK1                    | 1.35                 | 1.3                  | 0.48                    | 0                    |
| KIN4                    | 1.35                 | 1.3                  | 0.48                    | 0                    |
| CSR2                    | 1.35                 | 1.3                  | 0.48                    | 0                    |
| YPR117W                 | 1.35                 | 1.3                  | 0.48                    | 0                    |
| TOR1                    | 1.35                 | 1.3                  | 0.48                    | 0                    |
| PSD1                    | 2.14                 | 1.25                 | 0.48                    | 0                    |
| VAC8                    | 2.01                 | 1.14                 | 0.48                    | 0                    |
| TAN1                    | 1.44                 | 1.1                  | 0.48                    | 0                    |
| GGA2                    | 1.83                 | 1.09                 | 0.48                    | 0                    |
| CPR3                    | 1.24                 | 1.08                 | 0.48                    | 0                    |
| ANB1                    | 1.24                 | 1.08                 | 0.48                    | 0                    |
| AKL1                    | 1.24                 | 1.08                 | 0.48                    | 0                    |
| CBP3                    | 1.24                 | 1.08                 | 0.48                    | 0                    |
| ITC1                    | 1.24                 | 1.08                 | 0.48                    | 0                    |
| RLF2                    | 1.24                 | 1.08                 | 0.48                    | 0                    |
| KCC4                    | 1.24                 | 1.08                 | 0.48                    | 0                    |
| IRC20                   | 1.24                 | 1.08                 | 0.48                    | 0                    |
| PAP1                    | 1.24                 | 1.08                 | 0.48                    | 0                    |
| GRH1                    | 1.24                 | 1.08                 | 0.48                    | 0                    |
| APC1                    | 1.24                 | 1.08                 | 0.48                    | 0                    |
| HIS1                    | 1.24                 | 1.08                 | 0.48                    | 0                    |
| VRP1                    | 1.24                 | 1.08                 | 0.48                    | 0                    |
| RIX7                    | 1.24                 | 1.08                 | 0.48                    | 0                    |
| ARP4                    | 1.24                 | 1.08                 | 0.48                    | 0                    |
| RGD1                    | 1.24                 | 1.08                 | 0.48                    | 0                    |
| ALG5                    | 1.24                 | 1.08                 | 0.48                    | 0                    |
| MNN1                    | 2.12                 | 1.05                 | 0.48                    | 0                    |
| PMR1                    | 1.52                 | 1.04                 | 0.48                    | 0                    |
| FUN26                   | 1.21                 | 1.04                 | 0.48                    | 0                    |
| IMD2                    | 1.52                 | 1.01                 | 0.48                    | 0                    |
| CDC27                   | 1.92                 | 1.27                 | 0.47                    | 0                    |
| ALG9                    | 1.92                 | 1.27                 | 0.47                    | 0                    |
| IMD4                    | 1.86                 | 1.1                  | 0.47                    | 0                    |
| KAP95                   | 1.66                 | 1.1                  | 0.47                    | 0                    |
| STV1                    | 1.83                 | 1.04                 | 0.47                    | 0                    |
| BRE1                    | 1.29                 | 1.01                 | 0.46                    | 0                    |
| TAT1                    | 2.6                  | 1.23                 | 0.45                    | 0                    |

Table S4: FLAG affinity purification SAINT analysis PAGE 10

| RTR1 FLAG<br>PROTEIN ID | RTR1<br>FLAG<br>FC_A | RTR1<br>FLAG<br>FC_B | RTR1 FLAG<br>SAINT PROB | RTR1<br>FLAG<br>iREF |
|-------------------------|----------------------|----------------------|-------------------------|----------------------|
| MNN9                    | 2.35                 | 1.08                 | 0.45                    | 0                    |
| ARO1                    | 2.34                 | 1.03                 | 0.44                    | 0                    |
| SLC1                    | 1.68                 | 1                    | 0.41                    | 0                    |
| SNL1                    | 1.62                 | 1.19                 | 0.4                     | 0                    |
| ERG8                    | 1.56                 | 1.11                 | 0.39                    | 0                    |

Table S5: GOSTat analysis output of significant interactions in FLAG purifications

| <b>Best GOs</b>   | <b>Genes</b>                                                                          | <b>Count</b><br>50 | <b>Total</b><br>6476 | <b>P-Value</b><br><b>(Max:0.01)</b> |
|-------------------|---------------------------------------------------------------------------------------|--------------------|----------------------|-------------------------------------|
| <u>GO:0005665</u> | rpc10 rpo21 rpb5 rpb8 rpb2<br>rpb11 rpb3                                              | 7                  | 12                   | 4.72E-10                            |
| <u>GO:0000428</u> | rpc10 rpo21 rpb5 rpb8 rpb2<br>rpb11 rpb3                                              | 7                  | 31                   | 3.14E-07                            |
| <u>GO:0055029</u> | rpc10 rpo21 rpb5 rpb8 rpb2<br>rpb11 rpb3                                              | 7                  | 31                   | 3.14E-07                            |
| <u>GO:0030880</u> | rpc10 rpo21 rpb5 rpb8 rpb2<br>rpb11 rpb3                                              | 7                  | 31                   | 3.14E-07                            |
| <u>GO:0016591</u> | rpc10 rpb2 leo1 sin4 rpb3<br>rpo21 rpb5 rpb8 rpb11                                    | 9                  | 72                   | 3.14E-07                            |
| <u>GO:0003899</u> | rpc10 rpo21 rpb5 rpb8 rpb2<br>rpb11 rpb3                                              | 7                  | 34                   | 4.70E-07                            |
| <u>GO:0016740</u> | car2 utr1 rpc10 aro9 ard1<br>rpb2 rpb3 tal1 rpo21 erg20<br>pfk26 rpb8 rpb5 rpb11 grx1 | 15                 | 703                  | 0.00276                             |
| <u>GO:0016779</u> | rpc10 rpo21 rpb5 rpb8 rpb2<br>rpb11 rpb3                                              | 7                  | 123                  | 0.00276                             |
| <u>GO:0044451</u> | rpc10 rpb2 leo1 sin4 rpb3<br>rpo21 srb8 rpb5 rpb8 rpb11                               | 10                 | 313                  | 0.00709                             |
| <u>GO:0005736</u> | rpc10 rpb5 rpb8                                                                       | 3                  | 14                   | 0.00861                             |
| <u>GO:0005654</u> | rpc10 rpb2 leo1 sin4 rpb3<br>rpo21 srb8 rpb5 rpb8 rpb11                               | 10                 | 334                  | 0.00993                             |

Table S6: Double affinity purification (TAP) SAINT analysis Page 1

| RTR1 TAP<br>PROTEIN<br>ID | RTR1 TAP<br>FC_A | RTR1 TAP<br>FC_B | RTR1 TAP<br>SAINT<br>PROB | RTR1<br>TAP<br>iREF |
|---------------------------|------------------|------------------|---------------------------|---------------------|
| RTR1                      | 3057.23          | 1259.61          | 1                         | 1                   |
| RPB3                      | 168.89           | 106.54           | 1                         | 1                   |
| RPB5                      | 146.72           | 71.31            | 1                         | 1                   |
| RPO21                     | 109.1            | 47.26            | 1                         | 1                   |
| RPB2                      | 83.72            | 42               | 1                         | 1                   |
| RPB8                      | 55.67            | 30.46            | 0.92                      | 1                   |
| RPB11                     | 34.99            | 17.97            | 0.8                       | 1                   |
| RPO26                     | 43.25            | 15.06            | 0.8                       | 1                   |
| RPB10                     | 27.14            | 7.98             | 0.8                       | 1                   |
| LSM12                     | 19.37            | 7.12             | 0.78                      | 0                   |
| GPN3                      | 13.44            | 4.58             | 0.77                      | 0                   |
| RPC10                     | 20.25            | 8.9              | 0.69                      | 1                   |
| NPA3                      | 12.63            | 4.74             | 0.67                      | 1                   |
| PBP1                      | 7.81             | 2.65             | 0.63                      | 0                   |
| RPB9                      | 3.54             | 1.33             | 0.59                      | 1                   |
| TIF4632                   | 3.84             | 2.15             | 0.59                      | 0                   |
| RHR2                      | 5.65             | 1.08             | 0.59                      | 0                   |
| RPS29B                    | 4.45             | 2.62             | 0.58                      | 0                   |
| PSP2                      | 9.14             | 2.04             | 0.58                      | 0                   |
| ATP22                     | 5.61             | 2.59             | 0.57                      | 0                   |
| RPB4                      | 12.84            | 3.04             | 0.55                      | 1                   |
| TRA1                      | 3.79             | 2.44             | 0.52                      | 0                   |
| DBP3                      | 6.51             | 2.01             | 0.49                      | 0                   |
| IRR1                      | 2.43             | 1.13             | 0.48                      | 0                   |
| GAL11                     | 3.61             | 1.89             | 0.47                      | 0                   |
| MYO1                      | 4.15             | 1.44             | 0.47                      | 0                   |
| FPR4                      | 7.41             | 2.18             | 0.46                      | 0                   |
| MAK5                      | 3.43             | 1.99             | 0.45                      | 0                   |
| RFC3                      | 2.77             | 1.31             | 0.45                      | 0                   |
| CHD1                      | 5.48             | 2.31             | 0.43                      | 0                   |
| TIF4631                   | 3.11             | 1.45             | 0.43                      | 0                   |
| LIP5                      | 3.1              | 1.43             | 0.43                      | 0                   |
| CTR9                      | 2.99             | 1.65             | 0.42                      | 0                   |
| VMA8                      | 4.27             | 1.44             | 0.42                      | 0                   |
| FUN12                     | 13.13            | 2.01             | 0.41                      | 0                   |
| PRP43                     | 3.55             | 1.27             | 0.41                      | 0                   |
| CMK1                      | 4.51             | 1.16             | 0.4                       | 1                   |
| DBP9                      | 5.47             | 2.65             | 0.4                       | 0                   |
| APL5                      | 4.7              | 2.18             | 0.4                       | 0                   |
| GRX1                      | 2.8              | 1.98             | 0.4                       | 0                   |
| JIP5                      | 2.76             | 1.92             | 0.4                       | 0                   |
| URB1                      | 2.63             | 1.87             | 0.4                       | 0                   |
| UFD4                      | 3.18             | 1.85             | 0.4                       | 0                   |

Table S6: Double affinity purification (TAP) SAINT analysis Page 2

| RTR1 TAP<br>PROTEIN<br>ID | RTR1 TAP<br>FC_A | RTR1 TAP<br>FC_B | RTR1 TAP<br>SAINT<br>PROB | RTR1<br>TAP<br>iREF |
|---------------------------|------------------|------------------|---------------------------|---------------------|
| ECM16                     | 2.44             | 1.84             | 0.4                       | 0                   |
| BUD27                     | 2.67             | 1.81             | 0.4                       | 0                   |
| ROK1                      | 2.77             | 1.81             | 0.4                       | 0                   |
| RFC4                      | 3.13             | 1.8              | 0.4                       | 0                   |
| GCN3                      | 2.87             | 1.79             | 0.4                       | 0                   |
| SEC16                     | 4.65             | 1.77             | 0.4                       | 0                   |
| NOP10                     | 2.67             | 1.72             | 0.4                       | 0                   |
| ESF1                      | 2.09             | 1.69             | 0.4                       | 0                   |
| RFC5                      | 2.52             | 1.69             | 0.4                       | 0                   |
| KAP122                    | 2.16             | 1.65             | 0.4                       | 0                   |
| MYO4                      | 3.14             | 1.38             | 0.4                       | 0                   |
| RPA49                     | 4.04             | 1.38             | 0.4                       | 0                   |
| YSC84                     | 4.65             | 1.29             | 0.4                       | 0                   |
| NOP9                      | 1.61             | 1.26             | 0.4                       | 0                   |
| RSM25                     | 2.71             | 1.26             | 0.4                       | 0                   |
| NOC2                      | 2.79             | 1.24             | 0.4                       | 0                   |
| SXM1                      | 2.84             | 1.23             | 0.4                       | 0                   |
| DBP10                     | 3.64             | 1.21             | 0.4                       | 0                   |
| UTP20                     | 2.21             | 1.17             | 0.4                       | 0                   |
| MRD1                      | 2.15             | 1.17             | 0.4                       | 0                   |
| SDA1                      | 2.23             | 1.15             | 0.4                       | 0                   |
| LSB3                      | 5.32             | 1.15             | 0.4                       | 0                   |
| DLD3                      | 2.62             | 1.14             | 0.4                       | 0                   |
| SLA1                      | 3.98             | 1.09             | 0.4                       | 0                   |
| NOP58                     | 3.98             | 1.06             | 0.4                       | 0                   |
| SEC1                      | 4.06             | 1.06             | 0.4                       | 0                   |
| APL6                      | 1.76             | 1.04             | 0.4                       | 0                   |
| STE20                     | 1.94             | 1.02             | 0.4                       | 0                   |
| ARO9                      | 3.41             | 1.48             | 0.39                      | 0                   |
| NOP56                     | 5.39             | 1.48             | 0.39                      | 0                   |
| SRP72                     | 3.65             | 1.37             | 0.39                      | 0                   |
| CDC39                     | 5.16             | 1.1              | 0.39                      | 0                   |
| ENP1                      | 2.24             | 1.01             | 0.39                      | 0                   |
| BRE5                      | 5.37             | 2.4              | 0.38                      | 0                   |
| IXR1                      | 3.37             | 1.96             | 0.38                      | 0                   |
| TPT1                      | 2.62             | 1.67             | 0.38                      | 0                   |
| CNA1                      | 10.43            | 1.6              | 0.38                      | 0                   |
| SSF1                      | 1.94             | 1.6              | 0.38                      | 0                   |
| YPK2                      | 2.16             | 1.57             | 0.38                      | 0                   |
| APL3                      | 2.16             | 1.57             | 0.38                      | 0                   |
| NUP60                     | 5.02             | 1.56             | 0.38                      | 0                   |
| APS3                      | 1.55             | 1.41             | 0.38                      | 0                   |
| ENP2                      | 1.55             | 1.41             | 0.38                      | 0                   |

Table S6: Double affinity purification (TAP) SAINT analysis Page 3

| RTR1 TAP<br>PROTEIN<br>ID | RTR1 TAP<br>FC_A | RTR1 TAP<br>FC_B | RTR1 TAP<br>SAINT<br>PROB | RTR1<br>TAP<br>iREF |
|---------------------------|------------------|------------------|---------------------------|---------------------|
| PPN1                      | 1.5              | 1.38             | 0.38                      | 0                   |
| SRP21                     | 1.5              | 1.38             | 0.38                      | 0                   |
| SHE2                      | 1.5              | 1.38             | 0.38                      | 0                   |
| PPZ2                      | 1.45             | 1.34             | 0.38                      | 0                   |
| PAF1                      | 1.38             | 1.15             | 0.38                      | 0                   |
| SNU13                     | 3.39             | 1.07             | 0.38                      | 0                   |
| TAE2                      | 3.35             | 1.04             | 0.38                      | 0                   |
| HER1                      | 4.74             | 1.84             | 0.37                      | 0                   |
| FPR3                      | 8.33             | 1.49             | 0.37                      | 0                   |
| AAT1                      | 1.4              | 1.3              | 0.37                      | 0                   |
| SWT1                      | 1.4              | 1.3              | 0.37                      | 0                   |
| SSL1                      | 1.4              | 1.3              | 0.37                      | 0                   |
| ARA1                      | 1.4              | 1.3              | 0.37                      | 0                   |
| CDC53                     | 1.94             | 1.21             | 0.37                      | 0                   |
| CKA2                      | 1.8              | 1.03             | 0.37                      | 0                   |
| TAF12                     | 6.19             | 1.79             | 0.36                      | 0                   |
| SRP14                     | 2.06             | 1.22             | 0.36                      | 0                   |
| TAO3                      | 1.29             | 1.08             | 0.36                      | 0                   |
| NOC3                      | 2.02             | 1.09             | 0.35                      | 0                   |
| DBP6                      | 1.62             | 1.08             | 0.35                      | 0                   |
| CAR2                      | 1.93             | 1                | 0.35                      | 0                   |
| NOP7                      | 3.04             | 1.28             | 0.33                      | 0                   |
| GBP2                      | 3.39             | 1.11             | 0.33                      | 0                   |
| PHO81                     | 6.54             | 2.89             | 0.32                      | 0                   |
| PIB2                      | 4.71             | 2.54             | 0.32                      | 0                   |
| SNF6                      | 3.64             | 2.19             | 0.32                      | 0                   |
| YBR139W                   | 3.43             | 1.96             | 0.32                      | 0                   |
| RTS1                      | 5.32             | 1.94             | 0.32                      | 0                   |
| YPR097W                   | 2.69             | 1.94             | 0.32                      | 0                   |
| SEN1                      | 2.52             | 1.86             | 0.32                      | 0                   |
| PRE10                     | 3.49             | 1.75             | 0.32                      | 0                   |
| SEC8                      | 3.33             | 1.73             | 0.32                      | 0                   |
| HRQ1                      | 2.21             | 1.69             | 0.32                      | 0                   |
| SWP82                     | 3.03             | 1.68             | 0.32                      | 0                   |
| PUP3                      | 3.03             | 1.68             | 0.32                      | 0                   |
| PRI2                      | 2.88             | 1.66             | 0.32                      | 0                   |
| YAT2                      | 2.33             | 1.65             | 0.32                      | 0                   |
| SIN4                      | 2.73             | 1.63             | 0.32                      | 0                   |
| CYC1                      | 1.98             | 1.56             | 0.32                      | 0                   |
| APM1                      | 2.27             | 1.55             | 0.32                      | 0                   |
| HEM1                      | 1.96             | 1.47             | 0.32                      | 0                   |
| PUF4                      | 1.81             | 1.43             | 0.32                      | 0                   |
| SWI6                      | 1.81             | 1.43             | 0.32                      | 0                   |

Table S6: Double affinity purification (TAP) SAINT analysis Page 4

| RTR1 TAP<br>PROTEIN<br>ID | RTR1 TAP<br>FC_A | RTR1 TAP<br>FC_B | RTR1 TAP<br>SAINT<br>PROB | RTR1<br>TAP<br>iREF |
|---------------------------|------------------|------------------|---------------------------|---------------------|
| BEM4                      | 1.81             | 1.43             | 0.32                      | 0                   |
| YAP1802                   | 1.81             | 1.43             | 0.32                      | 0                   |
| URB2                      | 1.64             | 1.43             | 0.32                      | 0                   |
| YPR089W                   | 1.81             | 1.43             | 0.32                      | 0                   |
| NOC4                      | 1.81             | 1.43             | 0.32                      | 0                   |
| YGR016W                   | 1.54             | 1.39             | 0.32                      | 0                   |
| HSP26                     | 2.91             | 1.39             | 0.32                      | 0                   |
| UPF3                      | 1.66             | 1.38             | 0.32                      | 0                   |
| ARP7                      | 1.66             | 1.38             | 0.32                      | 0                   |
| KIP2                      | 1.66             | 1.38             | 0.32                      | 0                   |
| HSH155                    | 1.51             | 1.33             | 0.32                      | 0                   |
| NOP8                      | 1.35             | 1.28             | 0.32                      | 0                   |
| IFM1                      | 1.35             | 1.28             | 0.32                      | 0                   |
| URM1                      | 1.35             | 1.28             | 0.32                      | 0                   |
| IRC21                     | 1.3              | 1.25             | 0.32                      | 0                   |
| SSF2                      | 1.48             | 1.08             | 0.32                      | 0                   |
| RSC6                      | 1.58             | 1.05             | 0.31                      | 0                   |
| MRM1                      | 4.81             | 1.9              | 0.3                       | 0                   |
| RSF2                      | 2.24             | 1.7              | 0.3                       | 0                   |
| DAS2                      | 2.24             | 1.7              | 0.3                       | 0                   |
| AIM46                     | 1.6              | 1.44             | 0.3                       | 0                   |
| ELP4                      | 1.6              | 1.44             | 0.3                       | 0                   |
| ISA1                      | 1.64             | 1.38             | 0.3                       | 0                   |
| SSK1                      | 1.35             | 1.26             | 0.3                       | 0                   |
| SSU72                     | 1.35             | 1.26             | 0.3                       | 0                   |
| YTA7                      | 1.35             | 1.26             | 0.3                       | 0                   |
| CFD1                      | 1.35             | 1.26             | 0.3                       | 0                   |
| SPT20                     | 1.35             | 1.26             | 0.3                       | 0                   |
| RGR1                      | 1.35             | 1.26             | 0.3                       | 0                   |
| RAD53                     | 1.35             | 1.26             | 0.3                       | 0                   |
| GYL1                      | 1.35             | 1.26             | 0.3                       | 0                   |
| YML8                      | 1.25             | 1.21             | 0.3                       | 0                   |
| SLM1                      | 1.68             | 1.11             | 0.3                       | 0                   |
| TIM13                     | 8.33             | 1.89             | 0.29                      | 0                   |
| ISW2                      | 3.74             | 1.92             | 0.28                      | 0                   |
| SDS24                     | 3.77             | 1.51             | 0.28                      | 0                   |
| NOP1                      | 7.65             | 1.5              | 0.28                      | 0                   |
| APP1                      | 2.19             | 1.49             | 0.28                      | 0                   |
| HSP42                     | 2.72             | 1.47             | 0.28                      | 0                   |
| YRA2                      | 2                | 1.38             | 0.28                      | 0                   |
| PAP1                      | 2.36             | 1.33             | 0.28                      | 0                   |
| APL4                      | 2.08             | 1.28             | 0.28                      | 0                   |
| PRP28                     | 1.67             | 1.19             | 0.28                      | 0                   |



Table S6: Double affinity purification (TAP) SAINT analysis Page 5

| RTR1 TAP<br>PROTEIN<br>ID | RTR1 TAP<br>FC_A | RTR1 TAP<br>FC_B | RTR1 TAP<br>SAINT<br>PROB | RTR1<br>TAP<br>iREF |
|---------------------------|------------------|------------------|---------------------------|---------------------|
| HCA4                      | 1.47             | 1.18             | 0.28                      | 0                   |
| AKL1                      | 1.52             | 1.15             | 0.28                      | 0                   |
| RIX7                      | 1.38             | 1.1              | 0.28                      | 0                   |
| ARD1                      | 1.29             | 1.1              | 0.28                      | 0                   |
| FAD1                      | 3.19             | 1.74             | 0.27                      | 0                   |
| UTP25                     | 2.93             | 1.6              | 0.27                      | 0                   |
| RRP8                      | 1.25             | 1.05             | 0.27                      | 0                   |
| PRP2                      | 1.24             | 1.04             | 0.27                      | 0                   |
| CDC25                     | 1.24             | 1.04             | 0.27                      | 0                   |
| NUP84                     | 1.24             | 1.04             | 0.27                      | 0                   |
| CDC24                     | 1.15             | 1.01             | 0.27                      | 0                   |
| OSH2                      | 4.57             | 1.48             | 0.25                      | 0                   |
| KEL3                      | 2.31             | 1.31             | 0.25                      | 0                   |
| UBP13                     | 2.36             | 1.1              | 0.25                      | 0                   |
| GIP3                      | 2.11             | 1.07             | 0.25                      | 0                   |
| GEA1                      | 1.99             | 1.05             | 0.25                      | 0                   |
| FMC1                      | 1.92             | 1.09             | 0.24                      | 0                   |
| GCR2                      | 1.56             | 1.05             | 0.24                      | 0                   |
| ALB1                      | 2.09             | 1.07             | 0.23                      | 0                   |
| RFC2                      | 1.73             | 1.03             | 0.23                      | 0                   |
| ASR1                      | 4.72             | 1.81             | 0.2                       | 1                   |
| RPB7                      | 2.76             | 1.58             | 0.2                       | 1                   |
| BIK1                      | 1.91             | 1.41             | 0.2                       | 1                   |
| CYM1                      | 8.52             | 2.08             | 0.2                       | 0                   |
| CDC9                      | 4.66             | 1.81             | 0.2                       | 0                   |
| NGL3                      | 3.79             | 1.72             | 0.2                       | 0                   |
| GPI15                     | 3.79             | 1.72             | 0.2                       | 0                   |
| STE5                      | 3.74             | 1.71             | 0.2                       | 0                   |
| STU2                      | 3.44             | 1.68             | 0.2                       | 0                   |
| EXO70                     | 3.29             | 1.66             | 0.2                       | 0                   |
| SRO7                      | 3.29             | 1.66             | 0.2                       | 0                   |
| SUA5                      | 3.13             | 1.63             | 0.2                       | 0                   |
| RTT102                    | 2.83             | 1.59             | 0.2                       | 0                   |
| BUD6                      | 2.83             | 1.59             | 0.2                       | 0                   |
| DMC1                      | 2.76             | 1.58             | 0.2                       | 0                   |
| MPE1                      | 2.52             | 1.54             | 0.2                       | 0                   |
| HTA1                      | 3.36             | 1.54             | 0.2                       | 0                   |
| BOI2                      | 2.37             | 1.51             | 0.2                       | 0                   |
| KAP104                    | 2.37             | 1.51             | 0.2                       | 0                   |
| SKN7                      | 2.22             | 1.48             | 0.2                       | 0                   |
| SHE4                      | 2.22             | 1.48             | 0.2                       | 0                   |
| TAF4                      | 2.22             | 1.48             | 0.2                       | 0                   |
| MZM1                      | 2.18             | 1.47             | 0.2                       | 0                   |

Table S6: Double affinity purification (TAP) SAINT analysis Page 6

| RTR1 TAP<br>PROTEIN<br>ID | RTR1 TAP<br>FC_A | RTR1 TAP<br>FC_B | RTR1 TAP<br>SAINT<br>PROB | RTR1<br>TAP<br>iREF |
|---------------------------|------------------|------------------|---------------------------|---------------------|
| TSR1                      | 2.17             | 1.47             | 0.2                       | 0                   |
| SIR3                      | 2.07             | 1.45             | 0.2                       | 0                   |
| COG4                      | 2.07             | 1.45             | 0.2                       | 0                   |
| SDS23                     | 1.91             | 1.41             | 0.2                       | 0                   |
| ATG1                      | 1.91             | 1.41             | 0.2                       | 0                   |
| SWI4                      | 1.91             | 1.41             | 0.2                       | 0                   |
| YDR248C                   | 1.91             | 1.41             | 0.2                       | 0                   |
| SFP1                      | 1.91             | 1.41             | 0.2                       | 0                   |
| CYK3                      | 1.91             | 1.41             | 0.2                       | 0                   |
| CLA4                      | 1.91             | 1.41             | 0.2                       | 0                   |
| MUK1                      | 1.91             | 1.41             | 0.2                       | 0                   |
| CAF40                     | 1.91             | 1.41             | 0.2                       | 0                   |
| SOK1                      | 1.91             | 1.41             | 0.2                       | 0                   |
| YMR130W                   | 1.91             | 1.41             | 0.2                       | 0                   |
| LRG1                      | 1.91             | 1.41             | 0.2                       | 0                   |
| YLR407W                   | 1.89             | 1.4              | 0.2                       | 0                   |
| UME6                      | 1.76             | 1.37             | 0.2                       | 0                   |
| PCF11                     | 1.76             | 1.37             | 0.2                       | 0                   |
| ENT4                      | 1.76             | 1.37             | 0.2                       | 0                   |
| MAG1                      | 1.76             | 1.37             | 0.2                       | 0                   |
| CLF1                      | 1.76             | 1.37             | 0.2                       | 0                   |
| ATG26                     | 1.76             | 1.37             | 0.2                       | 0                   |
| RCN1                      | 1.76             | 1.37             | 0.2                       | 0                   |
| PRP18                     | 1.76             | 1.37             | 0.2                       | 0                   |
| YAP1801                   | 1.76             | 1.37             | 0.2                       | 0                   |
| SOD2                      | 1.76             | 1.37             | 0.2                       | 0                   |
| PBP2                      | 1.76             | 1.37             | 0.2                       | 0                   |
| PTP3                      | 1.76             | 1.37             | 0.2                       | 0                   |
| PET54                     | 1.76             | 1.37             | 0.2                       | 0                   |
| ORC5                      | 1.76             | 1.37             | 0.2                       | 0                   |
| COG6                      | 2.88             | 1.36             | 0.2                       | 0                   |
| BEM3                      | 2.74             | 1.34             | 0.2                       | 0                   |
| MOB2                      | 1.61             | 1.32             | 0.2                       | 0                   |
| MOB1                      | 1.61             | 1.32             | 0.2                       | 0                   |
| YMR124W                   | 1.61             | 1.32             | 0.2                       | 0                   |
| ECM14                     | 1.61             | 1.32             | 0.2                       | 0                   |
| MSO1                      | 1.61             | 1.32             | 0.2                       | 0                   |
| BEM1                      | 1.61             | 1.32             | 0.2                       | 0                   |
| PSK2                      | 1.61             | 1.32             | 0.2                       | 0                   |
| WHI5                      | 1.61             | 1.32             | 0.2                       | 0                   |
| SCD5                      | 1.61             | 1.32             | 0.2                       | 0                   |
| RPA14                     | 1.61             | 1.32             | 0.2                       | 0                   |
| CLP1                      | 1.61             | 1.32             | 0.2                       | 0                   |

Table S6: Double affinity purification (TAP) SAINT analysis Page 7

| RTR1 TAP<br>PROTEIN<br>ID | RTR1 TAP<br>FC_A | RTR1 TAP<br>FC_B | RTR1 TAP<br>SAINT<br>PROB | RTR1<br>TAP<br>iREF |
|---------------------------|------------------|------------------|---------------------------|---------------------|
| EFM1                      | 1.61             | 1.32             | 0.2                       | 0                   |
| SNX3                      | 1.61             | 1.32             | 0.2                       | 0                   |
| LDB19                     | 1.61             | 1.32             | 0.2                       | 0                   |
| AIM17                     | 1.61             | 1.32             | 0.2                       | 0                   |
| ORC4                      | 1.61             | 1.32             | 0.2                       | 0                   |
| MED8                      | 2.47             | 1.3              | 0.2                       | 0                   |
| NMD5                      | 2.32             | 1.28             | 0.2                       | 0                   |
| SWA2                      | 2.32             | 1.28             | 0.2                       | 0                   |
| PRP6                      | 1.46             | 1.27             | 0.2                       | 0                   |
| SMD1                      | 1.46             | 1.27             | 0.2                       | 0                   |
| MED1                      | 1.46             | 1.27             | 0.2                       | 0                   |
| YNL193W                   | 1.46             | 1.27             | 0.2                       | 0                   |
| MTF2                      | 1.46             | 1.27             | 0.2                       | 0                   |
| YLR419W                   | 1.46             | 1.27             | 0.2                       | 0                   |
| YPL014W                   | 1.46             | 1.27             | 0.2                       | 0                   |
| GCN2                      | 1.46             | 1.27             | 0.2                       | 0                   |
| YNL165W                   | 1.46             | 1.27             | 0.2                       | 0                   |
| PRP45                     | 1.46             | 1.27             | 0.2                       | 0                   |
| PRE2                      | 1.46             | 1.27             | 0.2                       | 0                   |
| COG2                      | 1.46             | 1.27             | 0.2                       | 0                   |
| CDD1                      | 1.46             | 1.27             | 0.2                       | 0                   |
| BUD7                      | 1.46             | 1.27             | 0.2                       | 0                   |
| GYP6                      | 1.46             | 1.27             | 0.2                       | 0                   |
| RSE1                      | 1.46             | 1.27             | 0.2                       | 0                   |
| YGL082W                   | 1.46             | 1.27             | 0.2                       | 0                   |
| SEC5                      | 1.46             | 1.27             | 0.2                       | 0                   |
| RRP46                     | 1.46             | 1.27             | 0.2                       | 0                   |
| CTT1                      | 1.44             | 1.26             | 0.2                       | 0                   |
| LEO1                      | 1.9              | 1.21             | 0.2                       | 0                   |
| YIL002W-A                 | 1.29             | 1.2              | 0.2                       | 0                   |
| TMA10                     | 1.29             | 1.2              | 0.2                       | 0                   |
| BRE1                      | 3.05             | 1.2              | 0.2                       | 0                   |
| NPC2                      | 1.29             | 1.2              | 0.2                       | 0                   |
| RRP17                     | 1.29             | 1.2              | 0.2                       | 0                   |
| NMD2                      | 1.29             | 1.2              | 0.2                       | 0                   |
| SWI1                      | 3.7              | 1.19             | 0.2                       | 0                   |
| ECM32                     | 1.24             | 1.17             | 0.2                       | 0                   |
| SEC10                     | 1.76             | 1.17             | 0.2                       | 0                   |
| YHR127W                   | 1.24             | 1.17             | 0.2                       | 0                   |
| KIP3                      | 1.24             | 1.17             | 0.2                       | 0                   |
| GLO1                      | 1.2              | 1.15             | 0.2                       | 0                   |
| SRB8                      | 1.2              | 1.15             | 0.2                       | 0                   |
| YLR422W                   | 1.2              | 1.15             | 0.2                       | 0                   |

Table S6: Double affinity purification (TAP) SAINT analysis Page 8

| RTR1 TAP<br>PROTEIN<br>ID | RTR1 TAP<br>FC_A | RTR1 TAP<br>FC_B | RTR1 TAP<br>SAINT<br>PROB | RTR1<br>TAP<br>iREF |
|---------------------------|------------------|------------------|---------------------------|---------------------|
| MSN4                      | 1.62             | 1.14             | 0.2                       | 0                   |
| GRX4                      | 1.62             | 1.14             | 0.2                       | 0                   |
| RGD1                      | 1.62             | 1.14             | 0.2                       | 0                   |
| SMY2                      | 2.41             | 1.13             | 0.2                       | 0                   |
| IOC2                      | 1.15             | 1.12             | 0.2                       | 0                   |
| ASE1                      | 1.15             | 1.12             | 0.2                       | 0                   |
| PET100                    | 1.15             | 1.12             | 0.2                       | 0                   |
| MTR10                     | 1.15             | 1.12             | 0.2                       | 0                   |
| LAP2                      | 1.15             | 1.12             | 0.2                       | 0                   |
| YBR053C                   | 1.15             | 1.12             | 0.2                       | 0                   |
| SEC61                     | 1.15             | 1.12             | 0.2                       | 0                   |
| MET32                     | 1.15             | 1.12             | 0.2                       | 0                   |
| RAD9                      | 1.15             | 1.12             | 0.2                       | 0                   |
| SGD1                      | 1.15             | 1.12             | 0.2                       | 0                   |
| NHP2                      | 1.46             | 1.1              | 0.2                       | 0                   |
| VPS5                      | 2.7              | 1.1              | 0.2                       | 0                   |
| RSC9                      | 2.45             | 1.07             | 0.2                       | 0                   |
| PRP16                     | 1.34             | 1.06             | 0.2                       | 0                   |
| EKI1                      | 1.45             | 1.06             | 0.2                       | 0                   |
| RSC30                     | 1.34             | 1.05             | 0.2                       | 0                   |
| PTA1                      | 1.34             | 1.05             | 0.2                       | 0                   |
| BIM1                      | 1.89             | 1.05             | 0.2                       | 0                   |
| PSR1                      | 1.76             | 1.03             | 0.2                       | 0                   |
| CPR8                      | 1.23             | 1.01             | 0.2                       | 0                   |
| PRE8                      | 2.8              | 1.01             | 0.2                       | 0                   |
| CTR86                     | 1.95             | 1                | 0.2                       | 0                   |
| UBX4                      | 1.95             | 1                | 0.2                       | 0                   |
| CMP2                      | 4.16             | 1.07             | 0.19                      | 0                   |
| UGA3                      | 4.76             | 1.82             | 0.18                      | 0                   |
| PCL7                      | 2.86             | 1.59             | 0.18                      | 0                   |
| MDM38                     | 1.59             | 1.32             | 0.18                      | 0                   |
| HYM1                      | 1.3              | 1.2              | 0.18                      | 0                   |
| SPB4                      | 1.3              | 1.2              | 0.18                      | 0                   |
| BUD4                      | 1.3              | 1.2              | 0.18                      | 0                   |
| STE12                     | 1.3              | 1.2              | 0.18                      | 0                   |
| MRE11                     | 1.3              | 1.2              | 0.18                      | 0                   |
| DPH1                      | 1.3              | 1.2              | 0.18                      | 0                   |
| MED7                      | 1.3              | 1.2              | 0.18                      | 0                   |
| SAP1                      | 1.3              | 1.2              | 0.18                      | 0                   |
| SSN2                      | 1.3              | 1.2              | 0.18                      | 0                   |
| YIL151C                   | 1.3              | 1.2              | 0.18                      | 0                   |
| NUF2                      | 1.3              | 1.2              | 0.18                      | 0                   |
| ATG2                      | 1.3              | 1.2              | 0.18                      | 0                   |

Table S6: Double affinity purification (TAP) SAINT analysis Page 9

| RTR1 TAP<br>PROTEIN<br>ID | RTR1 TAP<br>FC_A | RTR1 TAP<br>FC_B | RTR1 TAP<br>SAINT<br>PROB | RTR1<br>TAP<br>iREF |
|---------------------------|------------------|------------------|---------------------------|---------------------|
| MAF1                      | 1.3              | 1.2              | 0.18                      | 0                   |
| YPL245W                   | 1.3              | 1.2              | 0.18                      | 0                   |
| ARF3                      | 1.3              | 1.2              | 0.18                      | 0                   |
| BYE1                      | 1.3              | 1.2              | 0.18                      | 0                   |
| RTT107                    | 1.3              | 1.2              | 0.18                      | 0                   |
| MSN2                      | 1.3              | 1.2              | 0.18                      | 0                   |
| MAD3                      | 1.3              | 1.2              | 0.18                      | 0                   |
| HAL5                      | 1.3              | 1.2              | 0.18                      | 0                   |
| YMR111C                   | 1.3              | 1.2              | 0.18                      | 0                   |
| RKM3                      | 1.3              | 1.2              | 0.18                      | 0                   |
| VPS9                      | 1.3              | 1.2              | 0.18                      | 0                   |
| RET1                      | 1.3              | 1.2              | 0.18                      | 0                   |
| POP2                      | 1.3              | 1.2              | 0.18                      | 0                   |
| PIH1                      | 1.3              | 1.2              | 0.18                      | 0                   |
| MON2                      | 1.3              | 1.2              | 0.18                      | 0                   |
| ELP6                      | 1.3              | 1.2              | 0.18                      | 0                   |
| SEC15                     | 1.3              | 1.2              | 0.18                      | 0                   |
| YKR078W                   | 1.3              | 1.2              | 0.18                      | 0                   |
| SIS2                      | 1.3              | 1.2              | 0.18                      | 0                   |
| AVL9                      | 1.3              | 1.2              | 0.18                      | 0                   |
| INN1                      | 1.3              | 1.2              | 0.18                      | 0                   |
| YMR1                      | 1.3              | 1.2              | 0.18                      | 0                   |
| YBP2                      | 1.3              | 1.2              | 0.18                      | 0                   |
| MTQ2                      | 1.3              | 1.2              | 0.18                      | 0                   |
| PRR1                      | 1.3              | 1.2              | 0.18                      | 0                   |
| IES3                      | 1.3              | 1.2              | 0.18                      | 0                   |
| APT2                      | 1.3              | 1.2              | 0.18                      | 0                   |
| ART10                     | 1.3              | 1.2              | 0.18                      | 0                   |
| SRL2                      | 1.3              | 1.2              | 0.18                      | 0                   |
| YMR144W                   | 1.3              | 1.2              | 0.18                      | 0                   |
| CIN8                      | 1.3              | 1.2              | 0.18                      | 0                   |
| YLR118C                   | 1.3              | 1.2              | 0.18                      | 0                   |
| BIO2                      | 1.3              | 1.2              | 0.18                      | 0                   |
| ORC2                      | 1.3              | 1.2              | 0.18                      | 0                   |
| ORC3                      | 1.3              | 1.2              | 0.18                      | 0                   |
| FLO11                     | 1.3              | 1.2              | 0.18                      | 0                   |
| ZIP2                      | 1.46             | 1.09             | 0.18                      | 0                   |
| IOC4                      | 1.1              | 1.08             | 0.18                      | 0                   |
| AIM34                     | 1.1              | 1.08             | 0.18                      | 0                   |
| BUD21                     | 1.1              | 1.08             | 0.18                      | 0                   |
| BUD14                     | 1.1              | 1.08             | 0.18                      | 0                   |
| ERG25                     | 1.1              | 1.08             | 0.18                      | 0                   |
| MSN5                      | 1.1              | 1.08             | 0.18                      | 0                   |

Table S6: Double affinity purification (TAP) SAINT analysis Page 10

| RTR1 TAP<br>PROTEIN<br>ID | RTR1 TAP<br>FC_A | RTR1 TAP<br>FC_B | RTR1 TAP<br>SAINT<br>PROB | RTR1<br>TAP<br>iREF |
|---------------------------|------------------|------------------|---------------------------|---------------------|
| RPL39                     | 1.1              | 1.08             | 0.18                      | 0                   |
| CHK1                      | 1.1              | 1.08             | 0.18                      | 0                   |
| YIR024C                   | 1.1              | 1.08             | 0.18                      | 0                   |
| RGC1                      | 1.1              | 1.08             | 0.18                      | 0                   |
| YCR015C                   | 1.1              | 1.08             | 0.18                      | 0                   |
| FPK1                      | 1.1              | 1.08             | 0.18                      | 0                   |
| TGL1                      | 1.1              | 1.08             | 0.18                      | 0                   |
| RHB1                      | 1.1              | 1.08             | 0.18                      | 0                   |
| PGM2                      | 1.1              | 1.08             | 0.18                      | 0                   |
| PMD1                      | 1.1              | 1.08             | 0.18                      | 0                   |
| YJL133C-A                 | 1.1              | 1.08             | 0.18                      | 0                   |
| HXT9                      | 1.1              | 1.08             | 0.18                      | 0                   |
| APN2                      | 1.1              | 1.08             | 0.18                      | 0                   |
| YKL151C                   | 1.1              | 1.08             | 0.18                      | 0                   |
| FRT2                      | 1.1              | 1.08             | 0.18                      | 0                   |
| PCD1                      | 1.1              | 1.08             | 0.18                      | 0                   |
| DNL4                      | 1.1              | 1.08             | 0.18                      | 0                   |
| MPS2                      | 1.1              | 1.08             | 0.18                      | 0                   |
| GLE2                      | 2.53             | 1.08             | 0.18                      | 0                   |
| FOL1                      | 1.83             | 1.05             | 0.18                      | 0                   |
| PSY2                      | 1.2              | 1                | 0.18                      | 0                   |
| GRH1                      | 1.2              | 1                | 0.18                      | 0                   |
| SIR4                      | 1.2              | 1                | 0.18                      | 0                   |
| SPT15                     | 1.2              | 1                | 0.18                      | 0                   |
| DST1                      | 2.88             | 1.24             | 0.13                      | 0                   |
| SGN1                      | 4.05             | 1.29             | 0.12                      | 0                   |

Table S7: Full Rtr1 interactome SAINT analysis Page 1

| RTR1 ALL<br>PROTEIN<br>ID | RTR1<br>ALL<br>FC_A | RTR1<br>ALL<br>FC_B | RTR1 ALL<br>SAINT<br>PROB | RTR1<br>ALL<br>iREF |
|---------------------------|---------------------|---------------------|---------------------------|---------------------|
| RTR1                      | 2258.92             | 694.61              | 1                         | 1                   |
| RPB3                      | 110.35              | 54.8                | 1                         | 1                   |
| RPB1                      | 76.57               | 24.87               | 1                         | 1                   |
| RPB2                      | 59.94               | 24.73               | 1                         | 1                   |
| RPB12                     | 19.39               | 9.3                 | 0.89                      | 1                   |
| RPB5                      | 102                 | 24.86               | 0.85                      | 1                   |
| RPB8                      | 39.58               | 19.93               | 0.84                      | 1                   |
| NPA3                      | 10.93               | 3.76                | 0.57                      | 1                   |
| RPB11                     | 17.97               | 8.51                | 0.5                       | 1                   |
| TIF4631                   | 2.47                | 1.16                | 0.48                      | 0                   |
| HSP26                     | 3.83                | 1.55                | 0.46                      | 0                   |
| VPS5                      | 2.75                | 1.35                | 0.41                      | 0                   |
| CAR2                      | 2.21                | 1.01                | 0.41                      | 0                   |
| TIF4632                   | 2.55                | 1.46                | 0.4                       | 0                   |
| DBP3                      | 4.68                | 1.46                | 0.39                      | 0                   |
| ARO9                      | 2.18                | 1.24                | 0.39                      | 0                   |
| PHO81                     | 5.62                | 3.01                | 0.38                      | 0                   |
| RPB10                     | 17.44               | 2.31                | 0.37                      | 1                   |
| IDH2                      | 4.84                | 1.14                | 0.37                      | 0                   |
| RPC19                     | 1.88                | 1.12                | 0.37                      | 0                   |
| VMA8                      | 4.47                | 1.58                | 0.36                      | 0                   |
| GPN3                      | 9.76                | 2.49                | 0.35                      | 0                   |
| RPB6                      | 29.99               | 5.86                | 0.34                      | 1                   |
| MAK5                      | 2.44                | 1.38                | 0.33                      | 0                   |
| NUP60                     | 3.97                | 1.36                | 0.33                      | 0                   |
| CHD1                      | 3.58                | 1.38                | 0.32                      | 0                   |
| RSM25                     | 2.41                | 1.26                | 0.32                      | 0                   |
| DRS2                      | 1.78                | 1.03                | 0.32                      | 0                   |
| GAL11                     | 2.94                | 1.6                 | 0.3                       | 0                   |
| LSB3                      | 5.04                | 1.3                 | 0.3                       | 0                   |
| PHO84                     | 34.45               | 2.2                 | 0.29                      | 0                   |
| LEO1                      | 4.01                | 1.8                 | 0.29                      | 0                   |
| PUF4                      | 2.07                | 1.69                | 0.29                      | 0                   |
| TAF12                     | 4.83                | 1.55                | 0.29                      | 0                   |
| PBP1                      | 5.73                | 1.34                | 0.29                      | 0                   |
| ENP1                      | 3.41                | 1.33                | 0.29                      | 0                   |
| VPS13                     | 3.64                | 1.25                | 0.29                      | 0                   |
| RVS167                    | 5.25                | 1.21                | 0.29                      | 0                   |
| RPA49                     | 4.28                | 1.2                 | 0.29                      | 0                   |
| CDC53                     | 1.82                | 1.15                | 0.29                      | 0                   |
| RLP7                      | 2.93                | 1.13                | 0.29                      | 0                   |
| LSM12                     | 14.1                | 4.01                | 0.28                      | 0                   |
| SEC16                     | 3.92                | 1.59                | 0.28                      | 0                   |

Table S7: Full Rtr1 interactome SAINT analysis Page 2

| RTR1 ALL<br>PROTEIN<br>ID | RTR1<br>ALL<br>FC_A | RTR1<br>ALL<br>FC_B | RTR1 ALL<br>SAINT<br>PROB | RTR1<br>ALL<br>iREF |
|---------------------------|---------------------|---------------------|---------------------------|---------------------|
| ERV25                     | 3.25                | 1.29                | 0.28                      | 0                   |
| STE20                     | 4.57                | 1.28                | 0.28                      | 0                   |
| LIP5                      | 2.55                | 1.21                | 0.28                      | 0                   |
| DLD3                      | 2.39                | 1.05                | 0.28                      | 0                   |
| FPR3                      | 3.48                | 1                   | 0.28                      | 0                   |
| GGA2                      | 2.18                | 1                   | 0.28                      | 0                   |
| APL2                      | 1.59                | 1                   | 0.28                      | 0                   |
| PSP2                      | 7.03                | 1.6                 | 0.27                      | 0                   |
| MRD1                      | 1.9                 | 1.1                 | 0.27                      | 0                   |
| SYN8                      | 1.75                | 1.08                | 0.27                      | 0                   |
| GRX1                      | 2.08                | 1.64                | 0.26                      | 0                   |
| EAP1                      | 2.27                | 1.62                | 0.26                      | 0                   |
| APL5                      | 2.75                | 1.39                | 0.26                      | 0                   |
| NOP9                      | 1.45                | 1.13                | 0.26                      | 0                   |
| TRR1                      | 1.67                | 1.09                | 0.26                      | 0                   |
| PEP12                     | 1.78                | 1.04                | 0.26                      | 0                   |
| BMS1                      | 1.56                | 1.02                | 0.26                      | 0                   |
| HFA1                      | 2.47                | 1                   | 0.26                      | 0                   |
| HSP42                     | 2.11                | 1.39                | 0.25                      | 0                   |
| BRE5                      | 4.42                | 2.2                 | 0.24                      | 0                   |
| DBP9                      | 3.52                | 1.77                | 0.24                      | 0                   |
| GCN3                      | 2.85                | 1.76                | 0.24                      | 0                   |
| PRE10                     | 3.04                | 1.7                 | 0.24                      | 0                   |
| NMD5                      | 2.1                 | 1.28                | 0.24                      | 0                   |
| MYO1                      | 3.22                | 1.14                | 0.24                      | 0                   |
| REX4                      | 1.31                | 1.07                | 0.24                      | 0                   |
| KGD2                      | 4.94                | 1.02                | 0.24                      | 0                   |
| YPR097W                   | 2.54                | 2                   | 0.23                      | 0                   |
| OSH2                      | 3.92                | 1.51                | 0.23                      | 0                   |
| PRE2                      | 1.62                | 1.44                | 0.23                      | 0                   |
| APL4                      | 1.9                 | 1.24                | 0.23                      | 0                   |
| BIM1                      | 1.86                | 1.16                | 0.23                      | 0                   |
| ATP22                     | 4.24                | 1.81                | 0.22                      | 0                   |
| RFC4                      | 2.71                | 1.65                | 0.22                      | 0                   |
| CLA4                      | 2                   | 1.52                | 0.22                      | 0                   |
| COG4                      | 2.05                | 1.58                | 0.21                      | 0                   |
| ISW2                      | 2.98                | 1.57                | 0.21                      | 0                   |
| EFM1                      | 1.82                | 1.47                | 0.21                      | 0                   |
| PPN1                      | 1.62                | 1.46                | 0.21                      | 0                   |
| CTR9                      | 3.95                | 1.42                | 0.21                      | 0                   |
| SLM1                      | 1.48                | 1                   | 0.21                      | 0                   |
| BUD27                     | 2.23                | 1.55                | 0.2                       | 0                   |
| RCN1                      | 1.82                | 1.46                | 0.2                       | 0                   |



Table S7: Full Rtr1 interactome SAINT analysis Page 3

| RTR1 ALL<br>PROTEIN<br>ID | RTR1<br>ALL<br>FC_A | RTR1<br>ALL<br>FC_B | RTR1 ALL<br>SAINT<br>PROB | RTR1<br>ALL<br>iREF |
|---------------------------|---------------------|---------------------|---------------------------|---------------------|
| GDE1                      | 2.83                | 1.34                | 0.2                       | 0                   |
| COG6                      | 2.46                | 1.3                 | 0.2                       | 0                   |
| ALB1                      | 1.88                | 1.04                | 0.2                       | 0                   |
| SIN4                      | 2.52                | 1.75                | 0.19                      | 0                   |
| RTT102                    | 2.45                | 1.54                | 0.19                      | 0                   |
| APM1                      | 2.02                | 1.46                | 0.19                      | 0                   |
| SNX3                      | 1.67                | 1.44                | 0.19                      | 0                   |
| PBP2                      | 1.69                | 1.39                | 0.19                      | 0                   |
| RRP46                     | 1.57                | 1.37                | 0.19                      | 0                   |
| HEM14                     | 1.33                | 1.03                | 0.19                      | 0                   |
| HTL1                      | 1.48                | 1.01                | 0.19                      | 0                   |
| CYM1                      | 7.15                | 2.41                | 0.18                      | 0                   |
| ESF1                      | 1.52                | 1.34                | 0.18                      | 0                   |
| BRE1                      | 2.55                | 1.14                | 0.18                      | 0                   |
| YCR087C_A                 | 1.85                | 1.07                | 0.18                      | 0                   |
| RSC9                      | 2.1                 | 1.03                | 0.18                      | 0                   |
| GRH1                      | 1.21                | 1.02                | 0.18                      | 0                   |
| ASR1                      | 3.86                | 1.73                | 0.17                      | 1                   |
| TVP18                     | 3.53                | 1.63                | 0.17                      | 0                   |
| IXR1                      | 2.69                | 1.61                | 0.17                      | 0                   |
| PRP6                      | 1.84                | 1.52                | 0.17                      | 0                   |
| BOI2                      | 2.13                | 1.49                | 0.17                      | 0                   |
| TPT1                      | 2.19                | 1.47                | 0.17                      | 0                   |
| YRA2                      | 1.85                | 1.27                | 0.17                      | 0                   |
| PAP1                      | 2.01                | 1.22                | 0.17                      | 0                   |
| ARD1                      | 1.66                | 1.2                 | 0.17                      | 0                   |
| ERG5                      | 1.47                | 1.12                | 0.17                      | 0                   |
| GIP3                      | 1.87                | 1.02                | 0.17                      | 0                   |
| PIB2                      | 3.65                | 1.95                | 0.16                      | 0                   |
| RPS29B                    | 3.16                | 1.74                | 0.16                      | 0                   |
| YBR139W                   | 2.73                | 1.62                | 0.16                      | 0                   |
| DMA1                      | 1.81                | 1.45                | 0.16                      | 0                   |
| APL3                      | 1.91                | 1.44                | 0.16                      | 0                   |
| YDR248C                   | 1.8                 | 1.43                | 0.16                      | 0                   |
| ATG20                     | 2.85                | 1.27                | 0.16                      | 0                   |
| AKL1                      | 1.5                 | 1.17                | 0.16                      | 0                   |
| SMY2                      | 2.13                | 1.15                | 0.16                      | 0                   |
| CDC24                     | 1.49                | 1.15                | 0.16                      | 0                   |
| RGD1                      | 1.51                | 1.12                | 0.16                      | 0                   |
| HCA4                      | 1.34                | 1.08                | 0.16                      | 0                   |
| RIX7                      | 1.31                | 1.06                | 0.16                      | 0                   |
| LYS9                      | 1.23                | 1.03                | 0.16                      | 0                   |
| THI7                      | 3.37                | 1.89                | 0.15                      | 0                   |

Table S7: Full Rtr1 interactome SAINT analysis Page 4

| RTR1 ALL<br>PROTEIN<br>ID | RTR1<br>ALL<br>FC_A | RTR1<br>ALL<br>FC_B | RTR1 ALL<br>SAINT<br>PROB | RTR1<br>ALL<br>iREF |
|---------------------------|---------------------|---------------------|---------------------------|---------------------|
| SWI6                      | 1.74                | 1.45                | 0.15                      | 0                   |
| NOP16                     | 1.61                | 1.38                | 0.15                      | 0                   |
| RPB4                      | 8.12                | 1.37                | 0.15                      | 1                   |
| HER1                      | 3.6                 | 1.36                | 0.15                      | 0                   |
| AAD14                     | 1.57                | 1.36                | 0.15                      | 0                   |
| SHE2                      | 1.39                | 1.3                 | 0.15                      | 0                   |
| APP1                      | 1.83                | 1.26                | 0.15                      | 0                   |
| DUG1                      | 1.68                | 1.17                | 0.15                      | 0                   |
| SRP72                     | 2.73                | 1.04                | 0.15                      | 0                   |
| ACS1                      | 1.54                | 1.02                | 0.15                      | 0                   |
| MYO4                      | 2.22                | 1.01                | 0.15                      | 0                   |
| GNP1                      | 1.69                | 1.01                | 0.15                      | 0                   |
| SNF6                      | 2.89                | 1.75                | 0.14                      | 0                   |
| SEC8                      | 2.82                | 1.66                | 0.14                      | 0                   |
| PAF1                      | 4.08                | 1.49                | 0.14                      | 0                   |
| SHE4                      | 2                   | 1.45                | 0.14                      | 0                   |
| YPR089W                   | 1.74                | 1.45                | 0.14                      | 0                   |
| UME6                      | 1.64                | 1.35                | 0.14                      | 0                   |
| WHI5                      | 1.53                | 1.31                | 0.14                      | 0                   |
| COG2                      | 1.45                | 1.3                 | 0.14                      | 0                   |
| RCL1                      | 1.4                 | 1.27                | 0.14                      | 0                   |
| SDS24                     | 2.92                | 1.24                | 0.14                      | 0                   |
| PIH1                      | 1.32                | 1.23                | 0.14                      | 0                   |
| APS3                      | 1.32                | 1.23                | 0.14                      | 0                   |
| YLR179C                   | 1.31                | 1.23                | 0.14                      | 0                   |
| BEM3                      | 2.22                | 1.17                | 0.14                      | 0                   |
| MED8                      | 2.02                | 1.15                | 0.14                      | 0                   |
| SWA2                      | 1.92                | 1.13                | 0.14                      | 0                   |
| SWI1                      | 3                   | 1.11                | 0.14                      | 0                   |
| LYP1                      | 2.06                | 1.11                | 0.14                      | 0                   |
| PIS1                      | 1.78                | 1.11                | 0.14                      | 0                   |
| ERG28                     | 1.78                | 1.11                | 0.14                      | 0                   |
| EMC1                      | 1.78                | 1.11                | 0.14                      | 0                   |
| SEC10                     | 1.56                | 1.11                | 0.14                      | 0                   |
| SCS7                      | 1.74                | 1.1                 | 0.14                      | 0                   |
| MSN4                      | 1.46                | 1.08                | 0.14                      | 0                   |
| OST1                      | 1.51                | 1.06                | 0.14                      | 0                   |
| PRP28                     | 1.42                | 1.04                | 0.14                      | 0                   |
| CPR8                      | 1.39                | 1.03                | 0.14                      | 0                   |
| CDC27                     | 1.68                | 1.02                | 0.14                      | 0                   |
| HMF1                      | 1.28                | 1.01                | 0.14                      | 0                   |
| DCP2                      | 1.16                | 1                   | 0.14                      | 0                   |
| TRA1                      | 3.33                | 2.24                | 0.13                      | 0                   |

Table S7: Full Rtr1 interactome SAINT analysis Page 5

| RTR1 ALL<br>PROTEIN<br>ID | RTR1<br>ALL<br>FC_A | RTR1<br>ALL<br>FC_B | RTR1 ALL<br>SAINT<br>PROB | RTR1<br>ALL<br>iREF |
|---------------------------|---------------------|---------------------|---------------------------|---------------------|
| SIT1                      | 5.6                 | 1.65                | 0.13                      | 0                   |
| RTS1                      | 4.1                 | 1.63                | 0.13                      | 0                   |
| CDC9                      | 3.66                | 1.59                | 0.13                      | 0                   |
| STU2                      | 2.79                | 1.51                | 0.13                      | 0                   |
| EXO70                     | 2.68                | 1.5                 | 0.13                      | 0                   |
| YKL063C                   | 2.13                | 1.46                | 0.13                      | 0                   |
| SDS22                     | 1.86                | 1.45                | 0.13                      | 0                   |
| MPE1                      | 2.14                | 1.42                | 0.13                      | 0                   |
| MDM38                     | 1.61                | 1.41                | 0.13                      | 0                   |
| RFC5                      | 2.03                | 1.4                 | 0.13                      | 0                   |
| YPK2                      | 1.86                | 1.4                 | 0.13                      | 0                   |
| JIP5                      | 1.92                | 1.38                | 0.13                      | 0                   |
| TAF4                      | 1.92                | 1.38                | 0.13                      | 0                   |
| SOK1                      | 1.75                | 1.38                | 0.13                      | 0                   |
| AQR1                      | 1.74                | 1.37                | 0.13                      | 0                   |
| LDB19                     | 1.53                | 1.32                | 0.13                      | 0                   |
| TIM13                     | 6.15                | 1.29                | 0.13                      | 0                   |
| POP2                      | 1.4                 | 1.29                | 0.13                      | 0                   |
| RPA14                     | 1.48                | 1.27                | 0.13                      | 0                   |
| THO1                      | 1.31                | 1.23                | 0.13                      | 0                   |
| GRX4                      | 1.42                | 1.04                | 0.13                      | 0                   |
| YAT2                      | 2                   | 1.49                | 0.12                      | 0                   |
| STE5                      | 2.96                | 1.47                | 0.12                      | 0                   |
| SWP82                     | 2.46                | 1.47                | 0.12                      | 0                   |
| HRQ1                      | 1.86                | 1.45                | 0.12                      | 0                   |
| SRO7                      | 2.63                | 1.43                | 0.12                      | 0                   |
| SUA5                      | 2.52                | 1.42                | 0.12                      | 0                   |
| FAD1                      | 2.54                | 1.41                | 0.12                      | 0                   |
| BUD6                      | 2.31                | 1.39                | 0.12                      | 0                   |
| FTR1                      | 2.28                | 1.39                | 0.12                      | 0                   |
| CAB3                      | 2.12                | 1.37                | 0.12                      | 0                   |
| ROK1                      | 2.09                | 1.36                | 0.12                      | 0                   |
| NHX1                      | 1.82                | 1.36                | 0.12                      | 0                   |
| SFL1                      | 1.59                | 1.35                | 0.12                      | 0                   |
| AEP2                      | 1.99                | 1.34                | 0.12                      | 0                   |
| UTP25                     | 2.36                | 1.33                | 0.12                      | 0                   |
| YAP1802                   | 1.59                | 1.31                | 0.12                      | 0                   |
| SOD2                      | 1.59                | 1.31                | 0.12                      | 0                   |
| UPF3                      | 1.48                | 1.27                | 0.12                      | 0                   |
| YPL245W                   | 1.32                | 1.23                | 0.12                      | 0                   |
| KRE9                      | 1.28                | 1.21                | 0.12                      | 0                   |
| URM1                      | 1.21                | 1.17                | 0.12                      | 0                   |
| FUI1                      | 3.05                | 1.48                | 0.11                      | 0                   |

Table S7: Full Rtr1 interactome SAINT analysis Page 6

| RTR1 ALL<br>PROTEIN<br>ID | RTR1<br>ALL<br>FC_A | RTR1<br>ALL<br>FC_B | RTR1 ALL<br>SAINT<br>PROB | RTR1<br>ALL<br>iREF |
|---------------------------|---------------------|---------------------|---------------------------|---------------------|
| DAS2                      | 1.88                | 1.46                | 0.11                      | 0                   |
| UFD4                      | 2.42                | 1.41                | 0.11                      | 0                   |
| PUP3                      | 2.42                | 1.41                | 0.11                      | 0                   |
| PRI2                      | 2.31                | 1.39                | 0.11                      | 0                   |
| SKN7                      | 1.92                | 1.38                | 0.11                      | 0                   |
| NRT1                      | 2.02                | 1.35                | 0.11                      | 0                   |
| KAP104                    | 1.98                | 1.34                | 0.11                      | 0                   |
| YAP1801                   | 1.64                | 1.34                | 0.11                      | 0                   |
| ATG1                      | 1.7                 | 1.33                | 0.11                      | 0                   |
| PCF11                     | 1.59                | 1.31                | 0.11                      | 0                   |
| AIM46                     | 1.43                | 1.3                 | 0.11                      | 0                   |
| SDS23                     | 1.65                | 1.28                | 0.11                      | 0                   |
| SFP1                      | 1.65                | 1.28                | 0.11                      | 0                   |
| CYK3                      | 1.65                | 1.28                | 0.11                      | 0                   |
| MUK1                      | 1.65                | 1.28                | 0.11                      | 0                   |
| CAF40                     | 1.65                | 1.28                | 0.11                      | 0                   |
| MOB1                      | 1.48                | 1.27                | 0.11                      | 0                   |
| ARP7                      | 1.48                | 1.27                | 0.11                      | 0                   |
| BEM4                      | 1.54                | 1.25                | 0.11                      | 0                   |
| PRP18                     | 1.54                | 1.25                | 0.11                      | 0                   |
| NOC4                      | 1.54                | 1.25                | 0.11                      | 0                   |
| PET54                     | 1.54                | 1.25                | 0.11                      | 0                   |
| SMD1                      | 1.38                | 1.24                | 0.11                      | 0                   |
| SIS2                      | 1.32                | 1.23                | 0.11                      | 0                   |
| LST8                      | 1.33                | 1.22                | 0.11                      | 0                   |
| BUD23                     | 1.35                | 1.19                | 0.11                      | 0                   |
| HRI1                      | 1.3                 | 1.17                | 0.11                      | 0                   |
| TMA7                      | 1.21                | 1.17                | 0.11                      | 0                   |
| YGR016W                   | 1.21                | 1.17                | 0.11                      | 0                   |
| CBK1                      | 1.9                 | 1.51                | 0.1                       | 0                   |
| AIM39                     | 1.85                | 1.44                | 0.1                       | 0                   |
| MZM1                      | 1.89                | 1.37                | 0.1                       | 0                   |
| OPT1                      | 1.89                | 1.33                | 0.1                       | 0                   |
| SIR3                      | 1.76                | 1.3                 | 0.1                       | 0                   |
| ELP4                      | 1.43                | 1.3                 | 0.1                       | 0                   |
| HEM1                      | 1.65                | 1.28                | 0.1                       | 0                   |
| KAP122                    | 1.65                | 1.28                | 0.1                       | 0                   |
| SWI4                      | 1.65                | 1.28                | 0.1                       | 0                   |
| BIK1                      | 1.65                | 1.28                | 0.1                       | 1                   |
| YMR130W                   | 1.65                | 1.28                | 0.1                       | 0                   |
| ENT4                      | 1.54                | 1.25                | 0.1                       | 0                   |
| MAG1                      | 1.54                | 1.25                | 0.1                       | 0                   |
| CLF1                      | 1.54                | 1.25                | 0.1                       | 0                   |

Table S7: Full Rtr1 interactome SAINT analysis Page 7

| RTR1 ALL<br>PROTEIN<br>ID | RTR1<br>ALL<br>FC_A | RTR1<br>ALL<br>FC_B | RTR1 ALL<br>SAINT<br>PROB | RTR1<br>ALL<br>iREF |
|---------------------------|---------------------|---------------------|---------------------------|---------------------|
| PTP3                      | 1.54                | 1.25                | 0.1                       | 0                   |
| VHT1                      | 1.51                | 1.24                | 0.1                       | 0                   |
| MCD4                      | 1.51                | 1.24                | 0.1                       | 0                   |
| ECM14                     | 1.44                | 1.22                | 0.1                       | 0                   |
| AIM17                     | 1.44                | 1.22                | 0.1                       | 0                   |
| KIP2                      | 1.44                | 1.22                | 0.1                       | 0                   |
| RCR1                      | 1.31                | 1.21                | 0.1                       | 0                   |
| CPR4                      | 1.38                | 1.2                 | 0.1                       | 0                   |
| YNL193W                   | 1.33                | 1.19                | 0.1                       | 0                   |
| RHB1                      | 1.24                | 1.18                | 0.1                       | 0                   |
| UBC4                      | 1.21                | 1.17                | 0.1                       | 0                   |
| TSR1                      | 1.25                | 1.15                | 0.1                       | 0                   |
| SSN3                      | 1.25                | 1.15                | 0.1                       | 0                   |
| ZIP2                      | 1.31                | 1.01                | 0.1                       | 0                   |
| ECM16                     | 1.53                | 1.32                | 0.09                      | 0                   |
| LRG1                      | 1.65                | 1.28                | 0.09                      | 0                   |
| VPS53                     | 1.39                | 1.27                | 0.09                      | 0                   |
| ATG26                     | 1.54                | 1.25                | 0.09                      | 0                   |
| ORC5                      | 1.54                | 1.25                | 0.09                      | 0                   |
| ART10                     | 1.35                | 1.25                | 0.09                      | 0                   |
| FLC1                      | 1.51                | 1.24                | 0.09                      | 0                   |
| BAP2                      | 1.51                | 1.24                | 0.09                      | 0                   |
| MUP1                      | 1.51                | 1.24                | 0.09                      | 0                   |
| HSH155                    | 1.38                | 1.24                | 0.09                      | 0                   |
| ATP25                     | 1.47                | 1.23                | 0.09                      | 0                   |
| MOB2                      | 1.44                | 1.22                | 0.09                      | 0                   |
| MSO1                      | 1.44                | 1.22                | 0.09                      | 0                   |
| BEM1                      | 1.44                | 1.22                | 0.09                      | 0                   |
| CLP1                      | 1.44                | 1.22                | 0.09                      | 0                   |
| YMR124W                   | 1.44                | 1.22                | 0.09                      | 0                   |
| ORC4                      | 1.44                | 1.22                | 0.09                      | 0                   |
| SUR1                      | 1.38                | 1.2                 | 0.09                      | 0                   |
| ERP2                      | 1.38                | 1.2                 | 0.09                      | 0                   |
| HSP30                     | 1.38                | 1.2                 | 0.09                      | 0                   |
| YIF1                      | 1.37                | 1.2                 | 0.09                      | 0                   |
| MED1                      | 1.33                | 1.19                | 0.09                      | 0                   |
| MTF2                      | 1.33                | 1.19                | 0.09                      | 0                   |
| YPL014W                   | 1.33                | 1.19                | 0.09                      | 0                   |
| PRP45                     | 1.33                | 1.19                | 0.09                      | 0                   |
| GYP6                      | 1.33                | 1.19                | 0.09                      | 0                   |
| YGL082W                   | 1.33                | 1.19                | 0.09                      | 0                   |
| IES3                      | 1.27                | 1.19                | 0.09                      | 0                   |
| SEG1                      | 1.3                 | 1.17                | 0.09                      | 0                   |

Table S7: Full Rtr1 interactome SAINT analysis Page 8

| RTR1 ALL<br>PROTEIN<br>ID | RTR1<br>ALL<br>FC_A | RTR1<br>ALL<br>FC_B | RTR1 ALL<br>SAINT<br>PROB | RTR1<br>ALL<br>iREF |
|---------------------------|---------------------|---------------------|---------------------------|---------------------|
| TYR1                      | 1.28                | 1.17                | 0.09                      | 0                   |
| AIP1                      | 1.25                | 1.15                | 0.09                      | 0                   |
| YNL035C                   | 1.2                 | 1.13                | 0.09                      | 0                   |
| POL30                     | 1.15                | 1.11                | 0.09                      | 0                   |
| GPI15                     | 3.04                | 1.54                | 0.08                      | 0                   |
| MON1                      | 2.44                | 1.51                | 0.08                      | 0                   |
| NGL3                      | 2.99                | 1.47                | 0.08                      | 0                   |
| RSF2                      | 1.88                | 1.46                | 0.08                      | 0                   |
| NOP10                     | 2.09                | 1.36                | 0.08                      | 0                   |
| YLR407W                   | 1.63                | 1.27                | 0.08                      | 0                   |
| AUS1                      | 1.51                | 1.24                | 0.08                      | 0                   |
| BUD7                      | 1.38                | 1.24                | 0.08                      | 0                   |
| CFT2                      | 1.31                | 1.23                | 0.08                      | 0                   |
| PSK2                      | 1.44                | 1.22                | 0.08                      | 0                   |
| SCD5                      | 1.44                | 1.22                | 0.08                      | 0                   |
| MNN10                     | 1.38                | 1.2                 | 0.08                      | 0                   |
| YNL165W                   | 1.33                | 1.19                | 0.08                      | 0                   |
| CDD1                      | 1.33                | 1.19                | 0.08                      | 0                   |
| AAT1                      | 1.27                | 1.19                | 0.08                      | 0                   |
| SSL1                      | 1.27                | 1.19                | 0.08                      | 0                   |
| SGD1                      | 1.2                 | 1.13                | 0.08                      | 0                   |
| TRM10                     | 1.15                | 1.11                | 0.08                      | 0                   |
| PIN3                      | 1.15                | 1.11                | 0.08                      | 0                   |
| GRE3                      | 1.15                | 1.11                | 0.08                      | 0                   |
| APN1                      | 1.15                | 1.11                | 0.08                      | 0                   |
| PUS4                      | 1.15                | 1.11                | 0.08                      | 0                   |
| IES2                      | 1.15                | 1.11                | 0.08                      | 0                   |
| ECM32                     | 1.35                | 1.25                | 0.07                      | 0                   |
| GYL1                      | 1.31                | 1.23                | 0.07                      | 0                   |
| ISA1                      | 1.42                | 1.22                | 0.07                      | 0                   |
| PMC1                      | 1.38                | 1.2                 | 0.07                      | 0                   |
| SPB4                      | 1.27                | 1.19                | 0.07                      | 0                   |
| PPZ2                      | 1.27                | 1.19                | 0.07                      | 0                   |
| SWT1                      | 1.27                | 1.19                | 0.07                      | 0                   |
| YMR1                      | 1.27                | 1.19                | 0.07                      | 0                   |
| YBP2                      | 1.27                | 1.19                | 0.07                      | 0                   |
| YBR238C                   | 1.24                | 1.19                | 0.07                      | 0                   |
| SBH1                      | 1.28                | 1.17                | 0.07                      | 0                   |
| GLO1                      | 1.26                | 1.16                | 0.07                      | 0                   |
| PNT1                      | 1.26                | 1.16                | 0.07                      | 0                   |
| KTR6                      | 1.26                | 1.16                | 0.07                      | 0                   |
| HYM1                      | 1.22                | 1.14                | 0.07                      | 0                   |
| MAD3                      | 1.22                | 1.14                | 0.07                      | 0                   |

Table S7: Full Rtr1 interactome SAINT analysis Page 9

| RTR1 ALL<br>PROTEIN<br>ID | RTR1<br>ALL<br>FC_A | RTR1<br>ALL<br>FC_B | RTR1 ALL<br>SAINT<br>PROB | RTR1<br>ALL<br>iREF |
|---------------------------|---------------------|---------------------|---------------------------|---------------------|
| NUF2                      | 1.22                | 1.14                | 0.07                      | 0                   |
| DPH1                      | 1.22                | 1.14                | 0.07                      | 0                   |
| MED7                      | 1.22                | 1.14                | 0.07                      | 0                   |
| ARF3                      | 1.22                | 1.14                | 0.07                      | 0                   |
| SSU72                     | 1.22                | 1.14                | 0.07                      | 0                   |
| CFD1                      | 1.22                | 1.14                | 0.07                      | 0                   |
| SPT20                     | 1.22                | 1.14                | 0.07                      | 0                   |
| VPS9                      | 1.22                | 1.14                | 0.07                      | 0                   |
| ELP6                      | 1.22                | 1.14                | 0.07                      | 0                   |
| YKR078W                   | 1.22                | 1.14                | 0.07                      | 0                   |
| SSF1                      | 1.22                | 1.14                | 0.07                      | 0                   |
| INN1                      | 1.22                | 1.14                | 0.07                      | 0                   |
| ARA1                      | 1.22                | 1.14                | 0.07                      | 0                   |
| SRP21                     | 1.22                | 1.14                | 0.07                      | 0                   |
| MTQ2                      | 1.22                | 1.14                | 0.07                      | 0                   |
| APT2                      | 1.22                | 1.14                | 0.07                      | 0                   |
| SRL2                      | 1.22                | 1.14                | 0.07                      | 0                   |
| YMR144W                   | 1.22                | 1.14                | 0.07                      | 0                   |
| YLR118C                   | 1.22                | 1.14                | 0.07                      | 0                   |
| BIO2                      | 1.22                | 1.14                | 0.07                      | 0                   |
| ORC2                      | 1.22                | 1.14                | 0.07                      | 0                   |
| FMP21                     | 1.19                | 1.13                | 0.07                      | 0                   |
| VHS2                      | 1.15                | 1.11                | 0.07                      | 0                   |
| NPC2                      | 1.1                 | 1.08                | 0.07                      | 0                   |
| RPB7                      | 1.1                 | 1.08                | 0.07                      | 1                   |
| YCL012C                   | 1.1                 | 1.08                | 0.07                      | 0                   |
| FCY1                      | 1.1                 | 1.08                | 0.07                      | 0                   |
| SHG1                      | 1.1                 | 1.08                | 0.07                      | 0                   |
| ATO3                      | 1.1                 | 1.08                | 0.07                      | 0                   |
| ACB1                      | 1.1                 | 1.08                | 0.07                      | 0                   |
| MRM1                      | 3.68                | 1.53                | 0.06                      | 0                   |
| RSE1                      | 1.33                | 1.19                | 0.06                      | 0                   |
| SEC5                      | 1.33                | 1.19                | 0.06                      | 0                   |
| SPR28                     | 1.26                | 1.16                | 0.06                      | 0                   |
| MTC4                      | 1.26                | 1.16                | 0.06                      | 0                   |
| YMR111C                   | 1.22                | 1.14                | 0.06                      | 0                   |
| SSK1                      | 1.22                | 1.14                | 0.06                      | 0                   |
| MAF1                      | 1.22                | 1.14                | 0.06                      | 0                   |
| STE12                     | 1.22                | 1.14                | 0.06                      | 0                   |
| MSN2                      | 1.22                | 1.14                | 0.06                      | 0                   |
| RKM3                      | 1.22                | 1.14                | 0.06                      | 0                   |
| PRR1                      | 1.22                | 1.14                | 0.06                      | 0                   |
| OCA2                      | 1.19                | 1.13                | 0.06                      | 0                   |

Table S7: Full Rtr1 interactome SAINT analysis Page 10

| RTR1 ALL<br>PROTEIN<br>ID | RTR1<br>ALL<br>FC_A | RTR1<br>ALL<br>FC_B | RTR1 ALL<br>SAINT<br>PROB | RTR1<br>ALL<br>iREF |
|---------------------------|---------------------|---------------------|---------------------------|---------------------|
| APM4                      | 1.19                | 1.13                | 0.06                      | 0                   |
| GFD2                      | 1.19                | 1.13                | 0.06                      | 0                   |
| RML2                      | 1.19                | 1.13                | 0.06                      | 0                   |
| GYP8                      | 1.19                | 1.13                | 0.06                      | 0                   |
| TOP3                      | 1.19                | 1.13                | 0.06                      | 0                   |
| MET22                     | 1.15                | 1.11                | 0.06                      | 0                   |
| MSS4                      | 1.15                | 1.11                | 0.06                      | 0                   |
| LCB5                      | 1.15                | 1.11                | 0.06                      | 0                   |
| COX17                     | 1.1                 | 1.08                | 0.06                      | 0                   |
| HAP2                      | 1.1                 | 1.08                | 0.06                      | 0                   |
| DPP1                      | 1.1                 | 1.08                | 0.06                      | 0                   |
| COQ9                      | 1.1                 | 1.08                | 0.06                      | 0                   |
| DAT1                      | 1.1                 | 1.08                | 0.06                      | 0                   |
| VAM7                      | 1.1                 | 1.08                | 0.06                      | 0                   |
| TLG1                      | 1.1                 | 1.08                | 0.06                      | 0                   |
| SER2                      | 1.1                 | 1.08                | 0.06                      | 0                   |
| CAF16                     | 1.1                 | 1.08                | 0.06                      | 0                   |
| TAO3                      | 1.2                 | 1.02                | 0.06                      | 0                   |
| UGA3                      | 3.68                | 1.53                | 0.05                      | 0                   |
| PCL7                      | 2.33                | 1.4                 | 0.05                      | 0                   |
| NUP192                    | 1.49                | 1.31                | 0.05                      | 0                   |
| YLR419W                   | 1.38                | 1.24                | 0.05                      | 0                   |
| GCN2                      | 1.33                | 1.19                | 0.05                      | 0                   |
| HAL5                      | 1.27                | 1.19                | 0.05                      | 0                   |
| RTT107                    | 1.27                | 1.19                | 0.05                      | 0                   |
| CIN8                      | 1.27                | 1.19                | 0.05                      | 0                   |
| GEF1                      | 1.23                | 1.18                | 0.05                      | 0                   |
| SEC6                      | 1.21                | 1.17                | 0.05                      | 0                   |
| DSL1                      | 1.26                | 1.16                | 0.05                      | 0                   |
| DAP2                      | 1.26                | 1.16                | 0.05                      | 0                   |
| ENP2                      | 1.22                | 1.14                | 0.05                      | 0                   |
| BYE1                      | 1.22                | 1.14                | 0.05                      | 0                   |
| MRE11                     | 1.22                | 1.14                | 0.05                      | 0                   |
| SEC15                     | 1.22                | 1.14                | 0.05                      | 0                   |
| AVL9                      | 1.22                | 1.14                | 0.05                      | 0                   |
| RAD53                     | 1.22                | 1.14                | 0.05                      | 0                   |
| SAP1                      | 1.22                | 1.14                | 0.05                      | 0                   |
| ORC3                      | 1.22                | 1.14                | 0.05                      | 0                   |
| FLO11                     | 1.22                | 1.14                | 0.05                      | 0                   |
| FIG2                      | 1.2                 | 1.13                | 0.05                      | 0                   |
| YGR169C_A                 | 1.15                | 1.11                | 0.05                      | 0                   |
| TCO89                     | 1.15                | 1.11                | 0.05                      | 0                   |
| SPT2                      | 1.1                 | 1.08                | 0.05                      | 0                   |



Table S7: Full Rtr1 interactome SAINT analysis Page 11

| RTR1 ALL<br>PROTEIN<br>ID | RTR1<br>ALL<br>FC_A | RTR1<br>ALL<br>FC_B | RTR1 ALL<br>SAINT<br>PROB | RTR1<br>ALL<br>iREF |
|---------------------------|---------------------|---------------------|---------------------------|---------------------|
| QRI1                      | 1.1                 | 1.08                | 0.05                      | 0                   |
| RPN14                     | 1.1                 | 1.08                | 0.05                      | 0                   |
| URA1                      | 1.1                 | 1.08                | 0.05                      | 0                   |
| PIN2                      | 1.1                 | 1.08                | 0.05                      | 0                   |
| DEP1                      | 1.1                 | 1.08                | 0.05                      | 1                   |
| RET1                      | 1.31                | 1.23                | 0.04                      | 0                   |
| URB1                      | 1.33                | 1.19                | 0.04                      | 0                   |
| YTA7                      | 1.27                | 1.19                | 0.04                      | 0                   |
| RGR1                      | 1.27                | 1.19                | 0.04                      | 0                   |
| YDL073W                   | 1.24                | 1.18                | 0.04                      | 0                   |
| GYP5                      | 1.21                | 1.17                | 0.04                      | 0                   |
| YIL151C                   | 1.22                | 1.14                | 0.04                      | 0                   |
| YNL115C                   | 1.19                | 1.13                | 0.04                      | 0                   |
| SPC110                    | 1.19                | 1.13                | 0.04                      | 0                   |
| YMR027W                   | 1.1                 | 1.08                | 0.04                      | 0                   |
| DPH2                      | 1.1                 | 1.08                | 0.04                      | 0                   |
| YBR085C_A                 | 1.1                 | 1.08                | 0.04                      | 0                   |
| NGL2                      | 1.1                 | 1.08                | 0.04                      | 0                   |
| CTK1                      | 1.1                 | 1.08                | 0.04                      | 1                   |
| MON2                      | 1.27                | 1.19                | 0.03                      | 0                   |
| SSN2                      | 1.22                | 1.14                | 0.03                      | 0                   |
| ATG2                      | 1.22                | 1.14                | 0.03                      | 0                   |
| MSN5                      | 1.19                | 1.13                | 0.03                      | 0                   |
| RTC1                      | 1.15                | 1.11                | 0.03                      | 0                   |
| KIN82                     | 1.1                 | 1.08                | 0.03                      | 0                   |
| CBP2                      | 1.1                 | 1.08                | 0.03                      | 0                   |
| FPK1                      | 1.1                 | 1.08                | 0.03                      | 0                   |
| AGP2                      | 1.1                 | 1.08                | 0.03                      | 0                   |
| HOS3                      | 1.1                 | 1.08                | 0.03                      | 0                   |
| IRC8                      | 1.1                 | 1.08                | 0.03                      | 0                   |
| YLR422W                   | 1.31                | 1.23                | 0.02                      | 0                   |
| SRB8                      | 1.23                | 1.18                | 0.02                      | 0                   |
| BUD4                      | 1.22                | 1.14                | 0.02                      | 0                   |
| SGN1                      | 3.17                | 1.13                | 0.02                      | 0                   |
| PEP3                      | 1.1                 | 1.08                | 0.02                      | 0                   |
| ASE1                      | 1.1                 | 1.08                | 0.02                      | 0                   |
| RCM1                      | 1.1                 | 1.08                | 0.02                      | 0                   |
| TGL5                      | 1.1                 | 1.08                | 0.02                      | 0                   |
| KIN4                      | 1.1                 | 1.08                | 0.02                      | 0                   |
| KAP120                    | 1.1                 | 1.08                | 0.02                      | 0                   |
| YFR016C                   | 1.1                 | 1.08                | 0.02                      | 0                   |
| CSR2                      | 1.1                 | 1.08                | 0.02                      | 0                   |
| TOR1                      | 1.3                 | 1.26                | 0.01                      | 0                   |

Table S7: Full Rtr1 interactome SAINT analysis Page 12

| RTR1 ALL<br>PROTEIN<br>ID | RTR1<br>ALL<br>FC_A | RTR1<br>ALL<br>FC_B | RTR1 ALL<br>SAINT<br>PROB | RTR1<br>ALL<br>iREF |
|---------------------------|---------------------|---------------------|---------------------------|---------------------|
| SIP3                      | 1.1                 | 1.08                | 0.01                      | 0                   |

Table S8: Rtr1 WT and Rtr1 *ctk1Δ* SAINT analysis Page 1

| PROTEIN ID | RTR1 WT FC_A | RTR1 <i>ctk1Δ</i> FC_A | RTR1 WT FC_B | RTR1 <i>ctk1Δ</i> FC_B | RTR1 WT SAINT PROB | RTR1 <i>ctk1Δ</i> SAINT PROB | iREF (1=present, 0=absent) |
|------------|--------------|------------------------|--------------|------------------------|--------------------|------------------------------|----------------------------|
| RTR1       | 3757.31      | 3382.94                | 2083.54      | 1148.79                | 1                  | 1                            | 1                          |
| RPB5       | 171.47       | 7.04                   | 86.64        | 3.74                   | 1                  | 0.57                         | 1                          |
| RPB1       | 118.71       | 4.36                   | 50.15        | 0.85                   | 1                  | 0.49                         | 1                          |
| RPB2       | 89.83        | 3.03                   | 44.22        | 1.74                   | 1                  | 0.03                         | 1                          |
| RPB3       | 170.37       | 1.95                   | 101.06       | 1.28                   | 1                  | 0                            | 1                          |
| RPB8       | 59.12        | 0                      | 28.13        | 0                      | 0.95               | 0                            | 1                          |
| RPB6       | 51.06        | 0                      | 15.93        | 0                      | 0.75               | 0                            | 1                          |
| RPB10      | 30           | 0                      | 7.34         | 0                      | 0.75               | 0                            | 1                          |
| RPB11      | 26.06        | 0                      | 12.75        | 0                      | 0.75               | 0                            | 1                          |
| PBP1       | 9.6          | 0                      | 4.35         | 0                      | 0.75               | 0                            | 0                          |
| LSM12      | 23.84        | 0                      | 10.53        | 0                      | 0.75               | 0                            | 0                          |
| IRR1       | 2.66         | 132.23                 | 1.15         | 28.25                  | 0.42               | 1                            | 0                          |
| RRP41      | 0            | 41.94                  | 0            | 22.44                  | 0                  | 0.98                         | 0                          |
| UBA2       | 0            | 15.94                  | 0            | 10.02                  | 0                  | 0.93                         | 0                          |
| GPN3       | 16.31        | 0                      | 6.03         | 0                      | 0.74               | 0                            | 0                          |
| RPB12      | 24.18        | 0                      | 11.8         | 0                      | 0.72               | 0                            | 1                          |
| ATP22      | 6.73         | 0                      | 3.26         | 0                      | 0.67               | 0                            | 0                          |
| NPA3       | 14.94        | 0.87                   | 5.89         | 0.41                   | 0.64               | 0                            | 1                          |
| RSM25      | 3.19         | 0                      | 1.53         | 0                      | 0.5                | 0                            | 0                          |
| RHR2       | 5.07         | 1.1                    | 0.72         | 0.33                   | 0.5                | 0                            | 0                          |
| CMK1       | 5.5          | 0                      | 1.55         | 0                      | 0.5                | 0                            | 1                          |
| CNA1       | 12.96        | 0                      | 2.57         | 0                      | 0.5                | 0                            | 0                          |
| RPB9       | 3            | 0                      | 1.04         | 0                      | 0.5                | 0                            | 1                          |
| LIP5       | 3.63         | 0                      | 1.69         | 0                      | 0.5                | 0                            | 0                          |
| TIF4632    | 3.28         | 0                      | 1.75         | 0                      | 0.5                | 0                            | 0                          |
| MYO1       | 4.9          | 0                      | 1.66         | 0                      | 0.5                | 0                            | 0                          |
| PSP2       | 11.06        | 0                      | 2.43         | 0                      | 0.5                | 0                            | 0                          |
| SNF5       | 2.56         | 0                      | 0.38         | 0                      | 0.5                | 0                            | 0                          |
| NUP60      | 6.08         | 0                      | 1.96         | 0                      | 0.49               | 0                            | 0                          |
| RPS29B     | 4.7          | 0                      | 2.45         | 0                      | 0.49               | 0                            | 0                          |
| BRE5       | 6.46         | 0                      | 2.99         | 0                      | 0.49               | 0                            | 0                          |
| IXR1       | 3.96         | 0                      | 2.31         | 0                      | 0.49               | 0                            | 0                          |
| PBP4       | 2.41         | 0                      | 0.88         | 0                      | 0.49               | 0                            | 0                          |
| GAL11      | 4.22         | 0                      | 2.2          | 0                      | 0.49               | 0                            | 0                          |
| RPB4       | 13.43        | 0                      | 2.45         | 0                      | 0.48               | 0                            | 1                          |
| TAF12      | 7.53         | 0                      | 2.33         | 0                      | 0.48               | 0                            | 0                          |
| HEM13      | 2.73         | 0                      | 1.07         | 0                      | 0.47               | 0                            | 0                          |
| USO1       | 6.33         | 0                      | 1.36         | 0                      | 0.45               | 0                            | 0                          |
| YAT2       | 2.67         | 2.38                   | 1.87         | 1.94                   | 0.45               | 0                            | 0                          |
| HRQ1       | 2.51         | 0                      | 1.93         | 0                      | 0.45               | 0                            | 0                          |
| PIB2       | 5.64         | 0                      | 3.2          | 0                      | 0.45               | 0                            | 0                          |
| HER1       | 5.65         | 0                      | 2.21         | 0                      | 0.45               | 0                            | 0                          |

Table S8: Rtr1 WT and Rtr1 *ctk1Δ* SAINT analysis Page 2

| PROTEIN ID | RTR1 WT FC_A | RTR1 <i>ctk1Δ</i> FC_A | RTR1 WT FC_B | RTR1 <i>ctk1Δ</i> FC_B | RTR1 WT SAINT PROB | RTR1 <i>ctk1Δ</i> SAINT PROB | iREF (1=present, 0=absent) |
|------------|--------------|------------------------|--------------|------------------------|--------------------|------------------------------|----------------------------|
| PHO81      | 7.92         | 2.47                   | 3.76         | 1.98                   | 0.45               | 0                            | 0                          |
| YBR139W    | 4.04         | 0                      | 2.32         | 0                      | 0.45               | 0                            | 0                          |
| TRA1       | 4.3          | 0                      | 2.66         | 0                      | 0.45               | 0                            | 0                          |
| YPR097W    | 3.12         | 0                      | 2.28         | 0                      | 0.45               | 0                            | 0                          |
| SNF6       | 4.3          | 0                      | 2.66         | 0                      | 0.45               | 0                            | 0                          |
| SYP1       | 3.19         | 0                      | 1.24         | 0                      | 0.44               | 0                            | 0                          |
| RSF2       | 2.54         | 0                      | 1.94         | 0                      | 0.44               | 0                            | 0                          |
| AIM46      | 1.75         | 0                      | 1.58         | 0                      | 0.44               | 0                            | 0                          |
| SLM1       | 1.9          | 0                      | 1.26         | 0                      | 0.44               | 0                            | 0                          |
| DAS2       | 2.54         | 0                      | 1.94         | 0                      | 0.44               | 0                            | 0                          |
| ELP4       | 1.75         | 0                      | 1.58         | 0                      | 0.44               | 0                            | 0                          |
| IRR1       | 2.66         | 132.23                 | 1.15         | 28.25                  | 0.42               | 1                            | 0                          |
| ISW2       | 4.44         | 0                      | 2.36         | 0                      | 0.42               | 0                            | 0                          |
| RBA50      | 3.46         | 0                      | 1            | 0                      | 0.42               | 0                            | 0                          |
| APP1       | 2.51         | 0                      | 1.72         | 0                      | 0.42               | 0                            | 0                          |
| CDC53      | 2.13         | 0                      | 1.29         | 0                      | 0.42               | 0                            | 0                          |
| NUP1       | 3.31         | 0                      | 0.99         | 0                      | 0.42               | 0                            | 0                          |
| TIM13      | 10.23        | 0                      | 2.64         | 0                      | 0.42               | 0                            | 0                          |
| DBP3       | 4.36         | 0                      | 1.34         | 0                      | 0.42               | 0                            | 0                          |
| UTP25      | 3.44         | 0                      | 1.89         | 0                      | 0.41               | 0                            | 0                          |
| YGL041W_A  | 1.81         | 0                      | 0.5          | 0                      | 0.41               | 0                            | 0                          |
| RBG2       | 2.68         | 0                      | 0.71         | 0                      | 0.41               | 0                            | 0                          |
| FAD1       | 3.76         | 0                      | 2.1          | 0                      | 0.41               | 0                            | 0                          |
| CST6       | 3.4          | 0                      | 1.09         | 0                      | 0.41               | 0                            | 0                          |
| UBI4       | 5.28         | 0                      | 1.06         | 0                      | 0.41               | 0                            | 1                          |
| RTT103     | 1.72         | 0                      | 0.63         | 0                      | 0.39               | 0                            | 0                          |
| FPR4       | 4.01         | 0                      | 1.38         | 0                      | 0.39               | 0                            | 0                          |
| GND2       | 2.56         | 0                      | 0.89         | 0                      | 0.39               | 0                            | 0                          |
| BUD3       | 0.98         | 0                      | 0.48         | 0                      | 0.38               | 0                            | 0                          |
| ALB1       | 2.42         | 0                      | 1.23         | 0                      | 0.36               | 0                            | 0                          |
| FMC1       | 2.19         | 0                      | 1.24         | 0                      | 0.36               | 0                            | 0                          |
| OSH2       | 5.5          | 0                      | 1.81         | 0                      | 0.36               | 0                            | 0                          |
| MAK5       | 2.87         | 0                      | 1.62         | 0                      | 0.36               | 0                            | 0                          |
| RFC3       | 2.21         | 0                      | 1.04         | 0                      | 0.36               | 0                            | 0                          |
| GCR2       | 1.75         | 0                      | 1.18         | 0                      | 0.36               | 0                            | 0                          |
| ATP7       | 3.16         | 0                      | 0.63         | 0                      | 0.34               | 0                            | 0                          |
| TIF4631    | 2.97         | 0                      | 1.24         | 0                      | 0.34               | 0                            | 0                          |
| CHD1       | 5.16         | 16.51                  | 1.89         | 3.79                   | 0.33               | 0.5                          | 0                          |
| CTR9       | 2.24         | 0                      | 1.28         | 0                      | 0.33               | 0                            | 0                          |
| SRP14      | 2.24         | 0                      | 1.28         | 0                      | 0.33               | 0                            | 0                          |
| FMP52      | 4.5          | 0                      | 0.8          | 0                      | 0.32               | 0                            | 0                          |
| LYS12      | 3.28         | 0                      | 0.58         | 0                      | 0.31               | 0                            | 0                          |

Table S8: Rtr1 WT and Rtr1 *ctk1Δ* SAINT analysis Page 3

| PROTEIN ID | RTR1 WT FC_A | RTR1 <i>ctk1Δ</i> FC_A | RTR1 WT FC_B | RTR1 <i>ctk1Δ</i> FC_B | RTR1 WT SAINT PROB | RTR1 <i>ctk1Δ</i> SAINT PROB | iREF (1=present, 0=absent) |
|------------|--------------|------------------------|--------------|------------------------|--------------------|------------------------------|----------------------------|
| FOL1       | 2.09         | 8.64                   | 1.21         | 2.71                   | 0.3                | 0.5                          | 0                          |
| DST1       | 3.42         | 0                      | 1.55         | 0                      | 0.3                | 0                            | 0                          |
| VMA8       | 4.83         | 0                      | 1.5          | 0                      | 0.3                | 0                            | 0                          |
| GLE2       | 2.99         | 0                      | 1.31         | 0                      | 0.3                | 0                            | 0                          |
| FUN12      | 7.25         | 0                      | 1.09         | 0                      | 0.29               | 0                            | 0                          |
| KGD2       | 7.19         | 2.27                   | 1.17         | 1.01                   | 0.28               | 0.2                          | 0                          |
| PRP43      | 3.73         | 0                      | 1.15         | 0                      | 0.27               | 0                            | 0                          |
| HOR2       | 2.8          | 2.08                   | 0.51         | 0.52                   | 0.26               | 0                            | 0                          |
| HSP26      | 2.78         | 34.56                  | 1.22         | 22.45                  | 0.25               | 1                            | 0                          |
| DLD3       | 2.81         | 6.39                   | 1.08         | 2.31                   | 0.25               | 0.5                          | 0                          |
| ATG26      | 1.95         | 5.41                   | 1.48         | 3.13                   | 0.25               | 0.5                          | 0                          |
| CAR2       | 1.51         | 8.3                    | 0.8          | 2.04                   | 0.25               | 0.5                          | 0                          |
| GEA1       | 2.23         | 8.06                   | 1.11         | 2.86                   | 0.25               | 0.5                          | 0                          |
| APL5       | 3.73         | 57.73                  | 1.59         | 9.29                   | 0.25               | 0.5                          | 0                          |
| GRX3       | 1.41         | 89.52                  | 0.78         | 8.25                   | 0.25               | 0.5                          | 0                          |
| LSB3       | 6            | 6.97                   | 1.02         | 1.51                   | 0.25               | 0.49                         | 0                          |
| SWI4       | 2.14         | 3.94                   | 1.54         | 2.62                   | 0.25               | 0.48                         | 0                          |
| MAK21      | 1.18         | 1.52                   | 0.41         | 0.61                   | 0.25               | 0.11                         | 0                          |
| IDH2       | 3.59         | 1.71                   | 0.59         | 0.54                   | 0.25               | 0.01                         | 0                          |
| ARO1       | 2.97         | 2.11                   | 0.61         | 0.63                   | 0.25               | 0.01                         | 0                          |
| MYO2       | 1.72         | 2.42                   | 0.27         | 0.58                   | 0.25               | 0.01                         | 0                          |
| PRP6       | 1.57         | 0                      | 1.35         | 0                      | 0.25               | 0                            | 0                          |
| HEM1       | 2.14         | 2.47                   | 1.54         | 1.98                   | 0.25               | 0                            | 0                          |
| SUA7       | 2.09         | 0                      | 0.52         | 0                      | 0.25               | 0                            | 0                          |
| SUA5       | 3.67         | 0                      | 1.85         | 0                      | 0.25               | 0                            | 0                          |
| NOP9       | 1.44         | 0                      | 1.12         | 0                      | 0.25               | 0                            | 0                          |
| EDC3       | 1.6          | 0                      | 0.98         | 0                      | 0.25               | 0                            | 0                          |
| UTP22      | 2.29         | 0                      | 0.82         | 0                      | 0.25               | 0                            | 0                          |
| CIA2       | 1.49         | 0                      | 0.76         | 0                      | 0.25               | 0                            | 0                          |
| UTP20      | 1.5          | 0                      | 0.86         | 0                      | 0.25               | 0                            | 0                          |
| LAA1       | 1.34         | 0                      | 0.58         | 0                      | 0.25               | 0                            | 0                          |
| BUD27      | 2.71         | 0                      | 1.67         | 0                      | 0.25               | 0                            | 0                          |
| MOB2       | 1.76         | 0                      | 1.42         | 0                      | 0.25               | 0                            | 0                          |
| MOB1       | 1.76         | 0                      | 1.42         | 0                      | 0.25               | 0                            | 0                          |
| LEO1       | 2.15         | 0                      | 1.32         | 0                      | 0.25               | 0                            | 0                          |
| SMD1       | 1.57         | 0                      | 1.35         | 0                      | 0.25               | 0                            | 0                          |
| UME6       | 1.95         | 0                      | 1.48         | 0                      | 0.25               | 0                            | 0                          |
| URK1       | 1.41         | 0                      | 0.69         | 0                      | 0.25               | 0                            | 0                          |
| SWP82      | 3.48         | 0                      | 1.82         | 0                      | 0.25               | 0                            | 0                          |
| PSE1       | 5.85         | 0                      | 0.74         | 0                      | 0.25               | 0                            | 0                          |
| MOT2       | 1.83         | 0                      | 0.48         | 0                      | 0.25               | 0                            | 0                          |
| RPN5       | 1.36         | 0                      | 0.51         | 0                      | 0.25               | 0                            | 0                          |

Table S8: Rtr1 WT and Rtr1 *ctk1Δ* SAINT analysis Page 4

| PROTEIN ID | RTR1 WT FC_A | RTR1 <i>ctk1Δ</i> FC_A | RTR1 WT FC_B | RTR1 <i>ctk1Δ</i> FC_B | RTR1 WT SAINT PROB | RTR1 <i>ctk1Δ</i> SAINT PROB | iREF (1=present, 0=absent) |
|------------|--------------|------------------------|--------------|------------------------|--------------------|------------------------------|----------------------------|
| RPN8       | 1.64         | 0                      | 0.26         | 0                      | 0.25               | 0                            | 0                          |
| PCF11      | 1.95         | 0                      | 1.48         | 0                      | 0.25               | 0                            | 0                          |
| UFD4       | 3.48         | 0                      | 1.82         | 0                      | 0.25               | 0                            | 0                          |
| ENP1       | 2.15         | 0                      | 0.87         | 0                      | 0.25               | 0                            | 0                          |
| NUP82      | 1.76         | 1.66                   | 0.81         | 0.96                   | 0.25               | 0                            | 0                          |
| PRO1       | 1.87         | 0                      | 0.49         | 0                      | 0.25               | 0                            | 0                          |
| MED1       | 1.57         | 0                      | 1.35         | 0                      | 0.25               | 0                            | 0                          |
| MED8       | 2.85         | 0                      | 1.46         | 0                      | 0.25               | 0                            | 0                          |
| YML6       | 1.6          | 0                      | 0.98         | 0                      | 0.25               | 0                            | 0                          |
| RNA1       | 3.32         | 0                      | 0.63         | 0                      | 0.25               | 0                            | 0                          |
| MDN1       | 4.95         | 0                      | 0.41         | 0                      | 0.25               | 0                            | 0                          |
| YKT6       | 0.97         | 0                      | 0.12         | 0                      | 0.25               | 0                            | 0                          |
| WHI4       | 1.64         | 0                      | 0.9          | 0                      | 0.25               | 0                            | 0                          |
| DBP10      | 1.57         | 0                      | 0.75         | 0                      | 0.25               | 0                            | 0                          |
| SDS24      | 4.42         | 0                      | 1.67         | 0                      | 0.25               | 0                            | 0                          |
| SDS23      | 2.14         | 0                      | 1.54         | 0                      | 0.25               | 0                            | 0                          |
| WHI3       | 1.57         | 0                      | 0.73         | 0                      | 0.25               | 0                            | 0                          |
| TCP1       | 1.19         | 0.22                   | 0.14         | 0.08                   | 0.25               | 0                            | 0                          |
| PSR1       | 1.98         | 0                      | 1.12         | 0                      | 0.25               | 0                            | 0                          |
| ROK1       | 2.9          | 0                      | 1.71         | 0                      | 0.25               | 0                            | 0                          |
| YLR407W    | 2.11         | 0                      | 1.53         | 0                      | 0.25               | 0                            | 0                          |
| PRP28      | 1.8          | 0                      | 1.23         | 0                      | 0.25               | 0                            | 0                          |
| THR1       | 3.16         | 0                      | 0.9          | 0                      | 0.25               | 0                            | 0                          |
| ENT4       | 1.95         | 0                      | 1.48         | 0                      | 0.25               | 0                            | 0                          |
| CHA1       | 1.6          | 0                      | 0.69         | 0                      | 0.25               | 0                            | 0                          |
| ECM29      | 2.54         | 0                      | 0.68         | 0                      | 0.25               | 0                            | 0                          |
| ECM25      | 2.29         | 0                      | 0.88         | 0                      | 0.25               | 0                            | 0                          |
| RIA1       | 2.08         | 0                      | 0.98         | 0                      | 0.25               | 0                            | 0                          |
| MAG1       | 1.95         | 0                      | 1.48         | 0                      | 0.25               | 0                            | 0                          |
| DJP1       | 2.3          | 0                      | 0.63         | 0                      | 0.25               | 0                            | 0                          |
| CIC1       | 2.03         | 0                      | 0.79         | 0                      | 0.25               | 0                            | 0                          |
| NUP116     | 2.15         | 0.63                   | 0.3          | 0.25                   | 0.25               | 0                            | 0                          |
| ATG1       | 2.14         | 0                      | 1.54         | 0                      | 0.25               | 0                            | 0                          |
| SNF12      | 3.21         | 0                      | 0.74         | 0                      | 0.25               | 0                            | 0                          |
| TAH11      | 1.48         | 0                      | 0.62         | 0                      | 0.25               | 0                            | 0                          |
| GCD1       | 1.69         | 0                      | 0.6          | 0                      | 0.25               | 0                            | 0                          |
| RPS29A     | 1.21         | 0                      | 0.24         | 0                      | 0.25               | 0                            | 0                          |
| CLF1       | 1.95         | 0                      | 1.48         | 0                      | 0.25               | 0                            | 0                          |
| RSC30      | 1.44         | 0                      | 1.12         | 0                      | 0.25               | 0                            | 0                          |
| DRS1       | 1.57         | 0                      | 0.54         | 0                      | 0.25               | 0                            | 0                          |
| BRE1       | 3.6          | 0                      | 1.37         | 0                      | 0.25               | 0                            | 0                          |
| RCN2       | 1.49         | 0                      | 0.75         | 0                      | 0.25               | 0                            | 0                          |

Table S8: Rtr1 WT and Rtr1 *ctk1Δ* SAINT analysis Page 5

| PROTEIN ID | RTR1 WT FC_A | RTR1 <i>ctk1Δ</i> FC_A | RTR1 WT FC_B | RTR1 <i>ctk1Δ</i> FC_B | RTR1 WT SAINT PROB | RTR1 <i>ctk1Δ</i> SAINT PROB | iREF (1=present, 0=absent) |
|------------|--------------|------------------------|--------------|------------------------|--------------------|------------------------------|----------------------------|
| RCN1       | 1.95         | 0                      | 1.48         | 0                      | 0.25               | 0                            | 0                          |
| MET7       | 1.37         | 0                      | 0.65         | 0                      | 0.25               | 0                            | 0                          |
| MET4       | 1.76         | 0                      | 1.02         | 0                      | 0.25               | 0                            | 0                          |
| MSN4       | 1.79         | 0                      | 1.23         | 0                      | 0.25               | 0                            | 0                          |
| ECM16      | 1.76         | 0                      | 1.42         | 0                      | 0.25               | 0                            | 0                          |
| SLA1       | 4.41         | 0                      | 1            | 0                      | 0.25               | 0                            | 0                          |
| SWH1       | 1.1          | 0                      | 0.46         | 0                      | 0.25               | 0                            | 0                          |
| GGA2       | 2.7          | 0                      | 1.08         | 0                      | 0.25               | 0                            | 0                          |
| JSN1       | 2.22         | 0                      | 0.84         | 0                      | 0.25               | 0                            | 0                          |
| RTT102     | 3.29         | 0                      | 1.78         | 0                      | 0.25               | 0                            | 0                          |
| AKL1       | 1.62         | 0                      | 1.18         | 0                      | 0.25               | 0                            | 0                          |
| LDB19      | 1.76         | 0                      | 1.42         | 0                      | 0.25               | 0                            | 0                          |
| RPS19B     | 3.14         | 0.28                   | 0.96         | 0.06                   | 0.25               | 0                            | 0                          |
| YPK2       | 2.33         | 0                      | 1.59         | 0                      | 0.25               | 0                            | 0                          |
| BIK1       | 2.14         | 0                      | 1.54         | 0                      | 0.25               | 0                            | 1                          |
| PUF4       | 1.95         | 0                      | 1.48         | 0                      | 0.25               | 0                            | 0                          |
| PUF2       | 2.78         | 0                      | 0.87         | 0                      | 0.25               | 0                            | 0                          |
| OCA1       | 1.5          | 0                      | 0.86         | 0                      | 0.25               | 0                            | 0                          |
| NGL3       | 4.49         | 0                      | 1.97         | 0                      | 0.25               | 0                            | 0                          |
| IMH1       | 1.94         | 0                      | 0.51         | 0                      | 0.25               | 0                            | 0                          |
| RPS17B     | 2.5          | 1.71                   | 0.52         | 0.15                   | 0.25               | 0                            | 0                          |
| RSC3       | 2.09         | 0                      | 0.82         | 0                      | 0.25               | 0                            | 0                          |
| RSC6       | 1.66         | 0                      | 1.05         | 0                      | 0.25               | 0                            | 0                          |
| RRP12      | 1.79         | 0                      | 0.39         | 0                      | 0.25               | 0                            | 0                          |
| RSC9       | 2.85         | 0                      | 1.2          | 0                      | 0.25               | 0                            | 0                          |
| AHA1       | 1.85         | 0                      | 0.6          | 0                      | 0.25               | 0                            | 0                          |
| MEU1       | 2.63         | 0                      | 0.87         | 0                      | 0.25               | 0                            | 0                          |
| MCA1       | 2.12         | 0                      | 0.49         | 0                      | 0.25               | 0                            | 0                          |
| MSO1       | 1.76         | 0                      | 1.42         | 0                      | 0.25               | 0                            | 0                          |
| HSH155     | 1.57         | 0                      | 1.35         | 0                      | 0.25               | 0                            | 0                          |
| YSC84      | 5.07         | 0                      | 1.18         | 0                      | 0.25               | 0                            | 0                          |
| SWI6       | 1.95         | 0                      | 1.48         | 0                      | 0.25               | 0                            | 0                          |
| SWI1       | 4.42         | 0                      | 1.38         | 0                      | 0.25               | 0                            | 0                          |
| SWI3       | 3.16         | 0                      | 0.9          | 0                      | 0.25               | 0                            | 0                          |
| GIP3       | 2.39         | 0                      | 1.14         | 0                      | 0.25               | 0                            | 0                          |
| LRG1       | 2.14         | 0                      | 1.54         | 0                      | 0.25               | 0                            | 0                          |
| BEM1       | 1.76         | 0                      | 1.42         | 0                      | 0.25               | 0                            | 0                          |
| BEM3       | 3.2          | 0                      | 1.51         | 0                      | 0.25               | 0                            | 0                          |
| BEM4       | 1.95         | 0                      | 1.48         | 0                      | 0.25               | 0                            | 0                          |
| PRP18      | 1.95         | 0                      | 1.48         | 0                      | 0.25               | 0                            | 0                          |
| PRP16      | 1.45         | 0                      | 1.12         | 0                      | 0.25               | 0                            | 0                          |
| VPS52      | 1.6          | 0                      | 0.98         | 0                      | 0.25               | 0                            | 0                          |

Table S8: Rtr1 WT and Rtr1 *ctk1Δ* SAINT analysis Page 6

| PROTEIN ID | RTR1 WT FC_A | RTR1 <i>ctk1Δ</i> FC_A | RTR1 WT FC_B | RTR1 <i>ctk1Δ</i> FC_B | RTR1 WT SAINT PROB | RTR1 <i>ctk1Δ</i> SAINT PROB | iREF (1=present, 0=absent) |
|------------|--------------|------------------------|--------------|------------------------|--------------------|------------------------------|----------------------------|
| PSK2       | 1.76         | 0                      | 1.42         | 0                      | 0.25               | 0                            | 0                          |
| PSK1       | 1.44         | 0                      | 0.81         | 0                      | 0.25               | 0                            | 0                          |
| ECM14      | 1.76         | 0                      | 1.42         | 0                      | 0.25               | 0                            | 0                          |
| YDR248C    | 2.14         | 0                      | 1.54         | 0                      | 0.25               | 0                            | 0                          |
| WHI5       | 1.76         | 0                      | 1.42         | 0                      | 0.25               | 0                            | 0                          |
| YNL193W    | 1.57         | 0                      | 1.35         | 0                      | 0.25               | 0                            | 0                          |
| CMD1       | 0.79         | 0                      | 0.13         | 0                      | 0.25               | 0                            | 0                          |
| ATG19      | 1.39         | 0                      | 0.88         | 0                      | 0.25               | 0                            | 0                          |
| HOG1       | 1.47         | 0                      | 0.41         | 0                      | 0.25               | 0                            | 0                          |
| SOG2       | 1.76         | 0                      | 1.02         | 0                      | 0.25               | 0                            | 0                          |
| FPR3       | 3.22         | 0                      | 0.81         | 0                      | 0.25               | 0                            | 0                          |
| APM1       | 2.52         | 2.47                   | 1.63         | 1.98                   | 0.25               | 0                            | 0                          |
| APM3       | 1.57         | 0                      | 0.75         | 0                      | 0.25               | 0                            | 0                          |
| HGH1       | 1.21         | 0                      | 0.35         | 0                      | 0.25               | 0                            | 0                          |
| MPE1       | 2.9          | 2.47                   | 1.71         | 1.98                   | 0.25               | 0                            | 0                          |
| CDC14      | 2.04         | 0                      | 0.74         | 0                      | 0.25               | 0                            | 0                          |
| SFP1       | 2.14         | 0                      | 1.54         | 0                      | 0.25               | 0                            | 0                          |
| CLU1       | 2.79         | 0.17                   | 0.31         | 0.07                   | 0.25               | 0                            | 0                          |
| CLC1       | 2.28         | 0.46                   | 0.41         | 0.15                   | 0.25               | 0                            | 0                          |
| ATG18      | 1.82         | 0                      | 0.86         | 0                      | 0.25               | 0                            | 0                          |
| YAP1802    | 1.95         | 0                      | 1.48         | 0                      | 0.25               | 0                            | 0                          |
| UPF3       | 1.76         | 0                      | 1.42         | 0                      | 0.25               | 0                            | 0                          |
| YAP1801    | 1.95         | 0                      | 1.48         | 0                      | 0.25               | 0                            | 0                          |
| RPS15      | 3.01         | 0.57                   | 0.43         | 0.08                   | 0.25               | 0                            | 0                          |
| ASG1       | 2.36         | 0                      | 0.87         | 0                      | 0.25               | 0                            | 0                          |
| NUT1       | 2.04         | 0                      | 0.62         | 0                      | 0.25               | 0                            | 0                          |
| CBF5       | 1.2          | 0.82                   | 0.35         | 0.37                   | 0.25               | 0                            | 0                          |
| RVS167     | 6.89         | 0                      | 1.1          | 0                      | 0.25               | 0                            | 0                          |
| RVS161     | 4.76         | 0.44                   | 1.04         | 0.21                   | 0.25               | 0                            | 0                          |
| MCM3       | 2.2          | 0                      | 0.5          | 0                      | 0.25               | 0                            | 0                          |
| MDS3       | 1.45         | 0                      | 0.94         | 0                      | 0.25               | 0                            | 0                          |
| SOD2       | 1.95         | 0                      | 1.48         | 0                      | 0.25               | 0                            | 0                          |
| NMD5       | 2.67         | 0                      | 1.42         | 0                      | 0.25               | 0                            | 0                          |
| APL3       | 2.33         | 0                      | 1.59         | 0                      | 0.25               | 0                            | 0                          |
| APL2       | 1.6          | 0                      | 0.98         | 0                      | 0.25               | 0                            | 0                          |
| APL6       | 1.5          | 0                      | 0.87         | 0                      | 0.25               | 0                            | 0                          |
| APL4       | 2.32         | 0                      | 1.35         | 0                      | 0.25               | 0                            | 0                          |
| GET4       | 1.72         | 0                      | 0.39         | 0                      | 0.25               | 0                            | 0                          |
| NUP159     | 1.23         | 0                      | 0.67         | 0                      | 0.25               | 0                            | 0                          |
| YNR029C    | 1.76         | 0                      | 1.02         | 0                      | 0.25               | 0                            | 0                          |
| STH1       | 1.73         | 0                      | 0.79         | 0                      | 0.25               | 0                            | 0                          |
| MTF2       | 1.57         | 0                      | 1.35         | 0                      | 0.25               | 0                            | 0                          |



Table S8: Rtr1 WT and Rtr1 *ctk1Δ* SAINT analysis Page 7

| PROTEIN ID | RTR1 WT FC_A | RTR1 <i>ctk1Δ</i> FC_A | RTR1 WT FC_B | RTR1 <i>ctk1Δ</i> FC_B | RTR1 WT SAINT PROB | RTR1 <i>ctk1Δ</i> SAINT PROB | iREF (1=present, 0=absent) |
|------------|--------------|------------------------|--------------|------------------------|--------------------|------------------------------|----------------------------|
| CLP1       | 1.76         | 0                      | 1.42         | 0                      | 0.25               | 0                            | 0                          |
| MED6       | 1.79         | 0                      | 0.93         | 0                      | 0.25               | 0                            | 0                          |
| YLR419W    | 1.57         | 0                      | 1.35         | 0                      | 0.25               | 0                            | 0                          |
| GRX1       | 2.14         | 2.38                   | 1.54         | 1.94                   | 0.25               | 0                            | 0                          |
| GRX4       | 1.8          | 0                      | 1.23         | 0                      | 0.25               | 0                            | 0                          |
| YPL014W    | 1.57         | 0                      | 1.35         | 0                      | 0.25               | 0                            | 0                          |
| ESF1       | 1.57         | 0                      | 1.35         | 0                      | 0.25               | 0                            | 0                          |
| CYK3       | 2.14         | 0                      | 1.54         | 0                      | 0.25               | 0                            | 0                          |
| MZM1       | 2.48         | 0                      | 1.62         | 0                      | 0.25               | 0                            | 0                          |
| JIP5       | 2.52         | 0                      | 1.63         | 0                      | 0.25               | 0                            | 0                          |
| VPS1       | 0.82         | 0.38                   | 0.1          | 0.1                    | 0.25               | 0                            | 0                          |
| VPS5       | 3.17         | 0                      | 1.24         | 0                      | 0.25               | 0                            | 0                          |
| YMR124W    | 1.76         | 0                      | 1.42         | 0                      | 0.25               | 0                            | 0                          |
| PRI2       | 3.29         | 0                      | 1.78         | 0                      | 0.25               | 0                            | 0                          |
| ARO9       | 1.45         | 0                      | 0.94         | 0                      | 0.25               | 0                            | 0                          |
| CDC39      | 6.07         | 0                      | 1.1          | 0                      | 0.25               | 0                            | 0                          |
| CDC31      | 0.97         | 0                      | 0.27         | 0                      | 0.25               | 0                            | 0                          |
| CDC34      | 3.23         | 1.01                   | 0.56         | 0.48                   | 0.25               | 0                            | 0                          |
| GCN2       | 1.57         | 0                      | 1.35         | 0                      | 0.25               | 0                            | 0                          |
| CLA4       | 2.14         | 0                      | 1.54         | 0                      | 0.25               | 0                            | 0                          |
| YPK1       | 2.34         | 0.66                   | 0.34         | 0.29                   | 0.25               | 0                            | 0                          |
| TRM732     | 1.64         | 0                      | 0.9          | 0                      | 0.25               | 0                            | 0                          |
| VPS29      | 1.53         | 0                      | 0.71         | 0                      | 0.25               | 0                            | 0                          |
| YNL165W    | 1.57         | 0                      | 1.35         | 0                      | 0.25               | 0                            | 0                          |
| YHB1       | 3.39         | 0                      | 0.38         | 0                      | 0.25               | 0                            | 0                          |
| NRP1       | 1.54         | 0                      | 0.8          | 0                      | 0.25               | 0                            | 0                          |
| PBP2       | 1.95         | 0                      | 1.48         | 0                      | 0.25               | 0                            | 0                          |
| PRP45      | 1.57         | 0                      | 1.35         | 0                      | 0.25               | 0                            | 0                          |
| STE5       | 4.43         | 0                      | 1.96         | 0                      | 0.25               | 0                            | 0                          |
| DMA2       | 1.67         | 0                      | 0.83         | 0                      | 0.25               | 0                            | 0                          |
| URB1       | 1.57         | 0                      | 1.35         | 0                      | 0.25               | 0                            | 0                          |
| SXM1       | 3.06         | 1.96                   | 1.17         | 1.23                   | 0.25               | 0                            | 0                          |
| SCD5       | 1.76         | 0                      | 1.42         | 0                      | 0.25               | 0                            | 0                          |
| FUN30      | 2.92         | 0                      | 0.56         | 0                      | 0.25               | 0                            | 0                          |
| BOI2       | 2.71         | 0                      | 1.67         | 0                      | 0.25               | 0                            | 0                          |
| MUK1       | 2.14         | 0                      | 1.54         | 0                      | 0.25               | 0                            | 0                          |
| TPT1       | 2.9          | 0                      | 1.71         | 0                      | 0.25               | 0                            | 0                          |
| CAF40      | 2.14         | 0                      | 1.54         | 0                      | 0.25               | 0                            | 0                          |
| PAP1       | 2.67         | 0                      | 1.42         | 0                      | 0.25               | 0                            | 0                          |
| YPR089W    | 1.95         | 0                      | 1.48         | 0                      | 0.25               | 0                            | 0                          |
| GCN1       | 1.3          | 1.45                   | 0.1          | 0.23                   | 0.25               | 0                            | 0                          |
| RPA135     | 1.47         | 0                      | 0.41         | 0                      | 0.25               | 0                            | 0                          |

Table S8: Rtr1 WT and Rtr1 *ctk1Δ* SAINT analysis Page 8

| PROTEIN ID | RTR1 WT FC_A | RTR1 <i>ctk1Δ</i> FC_A | RTR1 WT FC_B | RTR1 <i>ctk1Δ</i> FC_B | RTR1 WT SAINT PROB | RTR1 <i>ctk1Δ</i> SAINT PROB | iREF (1=present, 0=absent) |
|------------|--------------|------------------------|--------------|------------------------|--------------------|------------------------------|----------------------------|
| GCN3       | 3.1          | 0                      | 1.75         | 0                      | 0.25               | 0                            | 0                          |
| SDA1       | 2.08         | 0                      | 0.98         | 0                      | 0.25               | 0                            | 0                          |
| RPA14      | 1.76         | 0                      | 1.42         | 0                      | 0.25               | 0                            | 0                          |
| NOP58      | 2.06         | 0.21                   | 0.65         | 0.11                   | 0.25               | 0                            | 0                          |
| KRI1       | 2.41         | 0                      | 0.83         | 0                      | 0.25               | 0                            | 0                          |
| MRD1       | 2.23         | 0                      | 1.11         | 0                      | 0.25               | 0                            | 0                          |
| SIN4       | 3.1          | 0                      | 1.75         | 0                      | 0.25               | 0                            | 0                          |
| VPS13      | 4.38         | 0                      | 1.19         | 0                      | 0.25               | 0                            | 0                          |
| SKN7       | 2.52         | 0                      | 1.63         | 0                      | 0.25               | 0                            | 0                          |
| CYM1       | 10.4         | 0                      | 2.49         | 0                      | 0.25               | 0                            | 0                          |
| SIR2       | 1.6          | 0                      | 0.98         | 0                      | 0.25               | 0                            | 0                          |
| SIR3       | 2.33         | 0                      | 1.59         | 0                      | 0.25               | 0                            | 0                          |
| SEC10      | 1.97         | 0                      | 1.27         | 0                      | 0.25               | 0                            | 0                          |
| SEC16      | 5.3          | 0                      | 1.76         | 0                      | 0.25               | 0                            | 0                          |
| CRM1       | 1.29         | 0                      | 0.41         | 0                      | 0.25               | 0                            | 0                          |
| MNP1       | 1.03         | 0                      | 0.36         | 0                      | 0.25               | 0                            | 0                          |
| SOK1       | 2.14         | 0                      | 1.54         | 0                      | 0.25               | 0                            | 0                          |
| PRE8       | 3.32         | 1.77                   | 1.16         | 1.16                   | 0.25               | 0                            | 0                          |
| PRE5       | 1.46         | 0                      | 0.3          | 0                      | 0.25               | 0                            | 0                          |
| PRE7       | 1.25         | 0                      | 0.45         | 0                      | 0.25               | 0                            | 0                          |
| PRE6       | 0.92         | 0                      | 0.33         | 0                      | 0.25               | 0                            | 0                          |
| PRE2       | 1.57         | 0                      | 1.35         | 0                      | 0.25               | 0                            | 0                          |
| EXO84      | 2.29         | 0                      | 0.96         | 0                      | 0.25               | 0                            | 0                          |
| APA1       | 1.79         | 0                      | 0.32         | 0                      | 0.25               | 0                            | 0                          |
| PRE10      | 4.05         | 0                      | 1.91         | 0                      | 0.25               | 0                            | 0                          |
| STU2       | 4.05         | 0                      | 1.91         | 0                      | 0.25               | 0                            | 0                          |
| DCP1       | 1.33         | 0                      | 0.69         | 0                      | 0.25               | 0                            | 0                          |
| STU1       | 1.6          | 0                      | 0.98         | 0                      | 0.25               | 0                            | 0                          |
| GPI15      | 4.49         | 0                      | 1.97         | 0                      | 0.25               | 0                            | 0                          |
| NOC2       | 1.83         | 0                      | 0.87         | 0                      | 0.25               | 0                            | 0                          |
| NOC4       | 1.95         | 0                      | 1.48         | 0                      | 0.25               | 0                            | 0                          |
| COG8       | 1.13         | 0                      | 0.62         | 0                      | 0.25               | 0                            | 0                          |
| COG2       | 1.57         | 0                      | 1.35         | 0                      | 0.25               | 0                            | 0                          |
| COG6       | 3.37         | 0                      | 1.53         | 0                      | 0.25               | 0                            | 0                          |
| COG5       | 1.6          | 0                      | 0.98         | 0                      | 0.25               | 0                            | 0                          |
| COG4       | 2.33         | 0                      | 1.59         | 0                      | 0.25               | 0                            | 0                          |
| CDC9       | 5.57         | 0                      | 2.1          | 0                      | 0.25               | 0                            | 0                          |
| SMY2       | 2.8          | 2.1                    | 1.27         | 1.41                   | 0.25               | 0                            | 0                          |
| SMY1       | 1.66         | 0                      | 0.73         | 0                      | 0.25               | 0                            | 0                          |
| HTL1       | 1.67         | 0                      | 1.06         | 0                      | 0.25               | 0                            | 0                          |
| SER1       | 3.29         | 0                      | 0.94         | 0                      | 0.25               | 0                            | 0                          |
| CDD1       | 1.57         | 0                      | 1.35         | 0                      | 0.25               | 0                            | 0                          |

Table S8: Rtr1 WT and Rtr1 *ctk1Δ* SAINT analysis Page 9

| PROTEIN ID | RTR1 WT FC_A | RTR1 <i>ctk1Δ</i> FC_A | RTR1 WT FC_B | RTR1 <i>ctk1Δ</i> FC_B | RTR1 WT SAINT PROB | RTR1 <i>ctk1Δ</i> SAINT PROB | iREF (1=present, 0=absent) |
|------------|--------------|------------------------|--------------|------------------------|--------------------|------------------------------|----------------------------|
| EBS1       | 1.23         | 0                      | 0.63         | 0                      | 0.25               | 0                            | 0                          |
| NRD1       | 1.6          | 0                      | 0.98         | 0                      | 0.25               | 0                            | 0                          |
| CEX1       | 3.2          | 0                      | 0.77         | 0                      | 0.25               | 0                            | 0                          |
| CTR86      | 2.23         | 0                      | 1.11         | 0                      | 0.25               | 0                            | 0                          |
| BUD7       | 1.57         | 0                      | 1.35         | 0                      | 0.25               | 0                            | 0                          |
| BUD6       | 3.29         | 0                      | 1.78         | 0                      | 0.25               | 0                            | 0                          |
| LSC1       | 0.87         | 0                      | 0.14         | 0                      | 0.25               | 0                            | 0                          |
| RTS1       | 6.33         | 0                      | 2.17         | 0                      | 0.25               | 0                            | 0                          |
| RIX1       | 1.12         | 0                      | 0.54         | 0                      | 0.25               | 0                            | 0                          |
| RIX7       | 1.44         | 2.27                   | 1.12         | 1.65                   | 0.25               | 0                            | 0                          |
| PIM1       | 1.32         | 0.51                   | 0.32         | 0.29                   | 0.25               | 0                            | 0                          |
| MLC1       | 3.24         | 0.52                   | 0.84         | 0.25                   | 0.25               | 0                            | 0                          |
| GYP6       | 1.57         | 0                      | 1.35         | 0                      | 0.25               | 0                            | 0                          |
| EFM1       | 1.76         | 0                      | 1.42         | 0                      | 0.25               | 0                            | 0                          |
| RSE1       | 1.57         | 0                      | 1.35         | 0                      | 0.25               | 0                            | 0                          |
| ARP9       | 3.48         | 0                      | 1.01         | 0                      | 0.25               | 0                            | 0                          |
| ARP7       | 1.76         | 0                      | 1.42         | 0                      | 0.25               | 0                            | 0                          |
| PBA1       | 2.27         | 0                      | 0.71         | 0                      | 0.25               | 0                            | 0                          |
| PSA1       | 4.79         | 0.43                   | 0.23         | 0.07                   | 0.25               | 0                            | 0                          |
| UBP13      | 2.7          | 0                      | 1.18         | 0                      | 0.25               | 0                            | 0                          |
| CMP2       | 5.1          | 0                      | 1.55         | 0                      | 0.25               | 0                            | 0                          |
| MCX1       | 1.33         | 0                      | 0.71         | 0                      | 0.25               | 0                            | 0                          |
| BRO1       | 1.66         | 0                      | 0.67         | 0                      | 0.25               | 0                            | 0                          |
| RSC58      | 1.5          | 1.52                   | 0.69         | 0.84                   | 0.25               | 0                            | 0                          |
| RPS30B     | 3.08         | 0                      | 0.79         | 0                      | 0.25               | 0                            | 0                          |
| PTA1       | 1.44         | 2.18                   | 1.12         | 1.61                   | 0.25               | 0                            | 0                          |
| RGD1       | 1.79         | 0                      | 1.23         | 0                      | 0.25               | 0                            | 0                          |
| RGD2       | 1.62         | 0                      | 0.52         | 0                      | 0.25               | 0                            | 0                          |
| DBP9       | 4.81         | 0                      | 2.01         | 0                      | 0.25               | 0                            | 0                          |
| DBP6       | 1.66         | 0                      | 1.05         | 0                      | 0.25               | 0                            | 0                          |
| DBP5       | 1.82         | 0.71                   | 0.25         | 0.48                   | 0.25               | 0                            | 0                          |
| MYO4       | 3.05         | 0                      | 1.16         | 0                      | 0.25               | 0                            | 0                          |
| PUP3       | 3.48         | 0                      | 1.82         | 0                      | 0.25               | 0                            | 0                          |
| MDJ1       | 1.45         | 0                      | 0.81         | 0                      | 0.25               | 0                            | 0                          |
| SHE4       | 2.52         | 0                      | 1.63         | 0                      | 0.25               | 0                            | 0                          |
| DOM34      | 1.84         | 0                      | 0.8          | 0                      | 0.25               | 0                            | 0                          |
| ETT1       | 3.55         | 0                      | 0.56         | 0                      | 0.25               | 0                            | 0                          |
| SNX3       | 1.76         | 0                      | 1.42         | 0                      | 0.25               | 0                            | 0                          |
| SNX4       | 1.79         | 0                      | 0.93         | 0                      | 0.25               | 0                            | 0                          |
| BIM1       | 2.15         | 0                      | 1.16         | 0                      | 0.25               | 0                            | 0                          |
| STE20      | 1.87         | 0                      | 0.9          | 0                      | 0.25               | 0                            | 0                          |
| PTP3       | 1.95         | 0                      | 1.48         | 0                      | 0.25               | 0                            | 0                          |

Table S8: Rtr1 WT and Rtr1 *ctk1Δ* SAINT analysis Page 10

| PROTEIN ID | RTR1 WT FC_A | RTR1 <i>ctk1Δ</i> FC_A | RTR1 WT FC_B | RTR1 <i>ctk1Δ</i> FC_B | RTR1 WT SAINT PROB | RTR1 <i>ctk1Δ</i> SAINT PROB | iREF (1=present, 0=absent) |
|------------|--------------|------------------------|--------------|------------------------|--------------------|------------------------------|----------------------------|
| KAP123     | 1.63         | 0.93                   | 0.1          | 0.16                   | 0.25               | 0                            | 0                          |
| KAP122     | 2.14         | 0                      | 1.54         | 0                      | 0.25               | 0                            | 0                          |
| RFC5       | 2.71         | 0                      | 1.67         | 0                      | 0.25               | 0                            | 0                          |
| RFC4       | 3.48         | 2.47                   | 1.82         | 1.98                   | 0.25               | 0                            | 0                          |
| RFC1       | 1.5          | 0                      | 0.54         | 0                      | 0.25               | 0                            | 0                          |
| RRP3       | 2.2          | 0                      | 0.39         | 0                      | 0.25               | 0                            | 0                          |
| SRP72      | 3.98         | 0                      | 1.27         | 0                      | 0.25               | 0                            | 0                          |
| MCK1       | 1.41         | 0                      | 0.52         | 0                      | 0.25               | 0                            | 0                          |
| YDR161W    | 2.9          | 0                      | 0.99         | 0                      | 0.25               | 0                            | 0                          |
| SWA2       | 2.68         | 0                      | 1.43         | 0                      | 0.25               | 0                            | 0                          |
| YKR018C    | 2.21         | 0                      | 0.48         | 0                      | 0.25               | 0                            | 0                          |
| PPZ1       | 0.99         | 0                      | 0.57         | 0                      | 0.25               | 0                            | 0                          |
| YGL082W    | 1.57         | 0                      | 1.35         | 0                      | 0.25               | 0                            | 0                          |
| CKA2       | 1.85         | 0                      | 0.99         | 0                      | 0.25               | 0                            | 0                          |
| AIM17      | 1.76         | 2.38                   | 1.42         | 1.94                   | 0.25               | 0                            | 0                          |
| SEC28      | 3.72         | 1.44                   | 0.95         | 0.85                   | 0.25               | 0                            | 0                          |
| EXO70      | 3.86         | 0                      | 1.88         | 0                      | 0.25               | 0                            | 0                          |
| RIM15      | 1.6          | 0                      | 0.98         | 0                      | 0.25               | 0                            | 0                          |
| MET10      | 2.02         | 0                      | 0.85         | 0                      | 0.25               | 0                            | 0                          |
| MET18      | 3.14         | 0                      | 1.06         | 0                      | 0.25               | 0                            | 0                          |
| PET54      | 1.95         | 0                      | 1.48         | 0                      | 0.25               | 0                            | 0                          |
| DHH1       | 2.88         | 0                      | 0.79         | 0                      | 0.25               | 0                            | 0                          |
| NOP10      | 2.9          | 0                      | 1.71         | 0                      | 0.25               | 0                            | 0                          |
| RMT2       | 1.45         | 0                      | 0.71         | 0                      | 0.25               | 0                            | 0                          |
| CCR4       | 1.58         | 0                      | 0.41         | 0                      | 0.25               | 0                            | 0                          |
| RPS25A     | 3.06         | 0.16                   | 0.27         | 0.06                   | 0.25               | 0                            | 0                          |
| IMG2       | 2.04         | 0                      | 0.99         | 0                      | 0.25               | 0                            | 0                          |
| UBX4       | 2.23         | 0                      | 1.11         | 0                      | 0.25               | 0                            | 0                          |
| SEC1       | 4.69         | 0                      | 1.06         | 0                      | 0.25               | 0                            | 0                          |
| SEC5       | 1.57         | 0                      | 1.35         | 0                      | 0.25               | 0                            | 0                          |
| SEC7       | 4.38         | 1.01                   | 0.63         | 0.49                   | 0.25               | 0                            | 0                          |
| SEC8       | 3.86         | 0                      | 1.88         | 0                      | 0.25               | 0                            | 0                          |
| VMA5       | 1.47         | 0.61                   | 0.22         | 0.16                   | 0.25               | 0                            | 0                          |
| NUM1       | 2.53         | 0                      | 0.67         | 0                      | 0.25               | 0                            | 0                          |
| RRP46      | 1.57         | 0                      | 1.35         | 0                      | 0.25               | 0                            | 0                          |
| NET1       | 1.66         | 0                      | 0.53         | 0                      | 0.25               | 0                            | 0                          |
| ASR1       | 5.65         | 0                      | 2.1          | 0                      | 0.25               | 0                            | 1                          |
| CYC8       | 1.66         | 0                      | 0.73         | 0                      | 0.25               | 0                            | 0                          |
| PRS3       | 1.06         | 0                      | 0.2          | 0                      | 0.25               | 0                            | 0                          |
| KAP95      | 3.5          | 0                      | 0.66         | 0                      | 0.25               | 0                            | 0                          |
| MOT1       | 1.07         | 0                      | 0.64         | 0                      | 0.25               | 0                            | 0                          |
| PBS2       | 4.24         | 0                      | 0.94         | 0                      | 0.25               | 0                            | 0                          |

Table S8: Rtr1 WT and Rtr1 *ctk1Δ* SAINT analysis Page 11

| PROTEIN ID | RTR1 WT FC_A | RTR1 <i>ctk1Δ</i> FC_A | RTR1 WT FC_B | RTR1 <i>ctk1Δ</i> FC_B | RTR1 WT SAINT PROB | RTR1 <i>ctk1Δ</i> SAINT PROB | iREF (1=present, 0=absent) |
|------------|--------------|------------------------|--------------|------------------------|--------------------|------------------------------|----------------------------|
| EKI1       | 1.59         | 0                      | 1.13         | 0                      | 0.25               | 0                            | 0                          |
| DNM1       | 2.03         | 0                      | 0.44         | 0                      | 0.25               | 0                            | 0                          |
| SFH1       | 2.67         | 0                      | 1.06         | 0                      | 0.25               | 0                            | 0                          |
| BCH1       | 1.64         | 0                      | 0.9          | 0                      | 0.25               | 0                            | 0                          |
| TAF5       | 2            | 0                      | 0.74         | 0                      | 0.25               | 0                            | 0                          |
| TAF4       | 2.52         | 0                      | 1.63         | 0                      | 0.25               | 0                            | 0                          |
| TAF9       | 1.83         | 0                      | 0.79         | 0                      | 0.25               | 0                            | 0                          |
| KIP2       | 1.76         | 2.38                   | 1.42         | 1.94                   | 0.25               | 0                            | 0                          |
| RPA49      | 3.72         | 0                      | 1.07         | 0                      | 0.25               | 0                            | 0                          |
| SRO9       | 3.43         | 0.31                   | 0.69         | 0.11                   | 0.25               | 0                            | 0                          |
| SRO7       | 3.86         | 0                      | 1.88         | 0                      | 0.25               | 0                            | 0                          |
| KAP104     | 2.71         | 0                      | 1.67         | 0                      | 0.25               | 0                            | 0                          |
| YMR130W    | 2.14         | 0                      | 1.54         | 0                      | 0.25               | 0                            | 0                          |
| CSR1       | 1.45         | 0                      | 0.37         | 0                      | 0.25               | 0                            | 0                          |
| RLP7       | 1.82         | 0                      | 0.86         | 0                      | 0.25               | 0                            | 0                          |
| ORC4       | 1.76         | 0                      | 1.42         | 0                      | 0.25               | 0                            | 0                          |
| ORC5       | 1.95         | 0                      | 1.48         | 0                      | 0.25               | 0                            | 0                          |
| ORC1       | 1.07         | 0                      | 0.64         | 0                      | 0.25               | 0                            | 0                          |
| SNF2       | 2.04         | 1.05                   | 0.54         | 0.53                   | 0.25               | 0                            | 0                          |
| RTT107     | 1.38         | 84.7                   | 1.26         | 12.98                  | 0.24               | 0.5                          | 0                          |
| PRP2       | 1.27         | 0                      | 1.05         | 0                      | 0.24               | 0                            | 0                          |
| HYM1       | 1.38         | 0                      | 1.26         | 0                      | 0.24               | 0                            | 0                          |
| ATP12      | 1.28         | 0                      | 0.67         | 0                      | 0.24               | 0                            | 0                          |
| CPR6       | 1.49         | 0                      | 0.3          | 0                      | 0.24               | 0                            | 0                          |
| GAR1       | 1.36         | 0                      | 0.31         | 0                      | 0.24               | 0                            | 0                          |
| SPB4       | 1.38         | 0                      | 1.26         | 0                      | 0.24               | 0                            | 0                          |
| PDR16      | 1.28         | 0                      | 0.26         | 0                      | 0.24               | 0                            | 0                          |
| SSK1       | 1.38         | 0                      | 1.26         | 0                      | 0.24               | 0                            | 0                          |
| BUD4       | 1.38         | 0                      | 1.26         | 0                      | 0.24               | 0                            | 0                          |
| TAE2       | 1.53         | 0                      | 0.65         | 0                      | 0.24               | 0                            | 0                          |
| STE12      | 1.38         | 0                      | 1.26         | 0                      | 0.24               | 0                            | 0                          |
| AAT1       | 1.38         | 0                      | 1.26         | 0                      | 0.24               | 0                            | 0                          |
| MTR2       | 1.29         | 0                      | 0.89         | 0                      | 0.24               | 0                            | 0                          |
| HFA1       | 1.63         | 0                      | 0.79         | 0                      | 0.24               | 0                            | 0                          |
| ZIP2       | 1.6          | 0                      | 1.17         | 0                      | 0.24               | 0                            | 0                          |
| UFD2       | 1.23         | 0                      | 0.57         | 0                      | 0.24               | 0                            | 0                          |
| MRE11      | 1.38         | 0                      | 1.26         | 0                      | 0.24               | 0                            | 0                          |
| ISW1       | 1.82         | 0                      | 0.57         | 0                      | 0.24               | 0                            | 0                          |
| SAP190     | 0.94         | 0                      | 0.6          | 0                      | 0.24               | 0                            | 0                          |
| RPC40      | 1.31         | 1.11                   | 0.37         | 0.48                   | 0.24               | 0                            | 0                          |
| SKG3       | 0.94         | 0                      | 0.6          | 0                      | 0.24               | 0                            | 0                          |
| DPH1       | 1.38         | 0                      | 1.26         | 0                      | 0.24               | 0                            | 0                          |

Table S8: Rtr1 WT and Rtr1 *ctk1Δ* SAINT analysis Page 12

| PROTEIN ID | RTR1 WT FC_A | RTR1 <i>ctk1Δ</i> FC_A | RTR1 WT FC_B | RTR1 <i>ctk1Δ</i> FC_B | RTR1 WT SAINT PROB | RTR1 <i>ctk1Δ</i> SAINT PROB | iREF (1=present, 0=absent) |
|------------|--------------|------------------------|--------------|------------------------|--------------------|------------------------------|----------------------------|
| PPN1       | 1.38         | 0                      | 1.26         | 0                      | 0.24               | 0                            | 0                          |
| MED7       | 1.38         | 0                      | 1.26         | 0                      | 0.24               | 0                            | 0                          |
| SAP1       | 1.38         | 0                      | 1.26         | 0                      | 0.24               | 0                            | 0                          |
| SSN2       | 1.38         | 0                      | 1.26         | 0                      | 0.24               | 0                            | 0                          |
| KRE33      | 2.3          | 0                      | 0.75         | 0                      | 0.24               | 0                            | 0                          |
| YIL151C    | 1.38         | 0                      | 1.26         | 0                      | 0.24               | 0                            | 0                          |
| PPZ2       | 1.38         | 0                      | 1.26         | 0                      | 0.24               | 0                            | 0                          |
| NUF2       | 1.38         | 0                      | 1.26         | 0                      | 0.24               | 0                            | 0                          |
| ATG2       | 1.38         | 0                      | 1.26         | 0                      | 0.24               | 0                            | 0                          |
| GCD7       | 1.45         | 1.32                   | 0.55         | 0.65                   | 0.24               | 0                            | 0                          |
| ATG20      | 1.29         | 0                      | 0.89         | 0                      | 0.24               | 0                            | 0                          |
| SWT1       | 1.38         | 0                      | 1.26         | 0                      | 0.24               | 0                            | 0                          |
| MAF1       | 1.38         | 0                      | 1.26         | 0                      | 0.24               | 0                            | 0                          |
| SRB2       | 1.28         | 0                      | 0.54         | 0                      | 0.24               | 0                            | 0                          |
| YPL245W    | 1.38         | 0                      | 1.26         | 0                      | 0.24               | 0                            | 0                          |
| ARF3       | 1.38         | 0                      | 1.26         | 0                      | 0.24               | 0                            | 0                          |
| SLA2       | 1.97         | 0                      | 0.38         | 0                      | 0.24               | 0                            | 0                          |
| BYE1       | 1.38         | 0                      | 1.26         | 0                      | 0.24               | 0                            | 0                          |
| EMI2       | 1.35         | 0                      | 0.83         | 0                      | 0.24               | 0                            | 0                          |
| SSU72      | 1.38         | 0                      | 1.26         | 0                      | 0.24               | 0                            | 0                          |
| YTA6       | 1.09         | 0                      | 0.78         | 0                      | 0.24               | 0                            | 0                          |
| YTA7       | 1.38         | 0                      | 1.26         | 0                      | 0.24               | 0                            | 0                          |
| SUP35      | 1.19         | 0                      | 0.23         | 0                      | 0.24               | 0                            | 0                          |
| PCL7       | 3.33         | 0                      | 1.79         | 0                      | 0.24               | 0                            | 0                          |
| SSL1       | 1.38         | 0                      | 1.26         | 0                      | 0.24               | 0                            | 0                          |
| YML13      | 1.3          | 0                      | 0.51         | 0                      | 0.24               | 0                            | 0                          |
| CFD1       | 1.38         | 0                      | 1.26         | 0                      | 0.24               | 0                            | 0                          |
| MSN2       | 1.38         | 0                      | 1.26         | 0                      | 0.24               | 0                            | 0                          |
| MAD3       | 1.38         | 0                      | 1.26         | 0                      | 0.24               | 0                            | 0                          |
| MDM38      | 1.74         | 0                      | 1.41         | 0                      | 0.24               | 0                            | 0                          |
| PSY2       | 1.27         | 0                      | 1.05         | 0                      | 0.24               | 0                            | 0                          |
| HAL5       | 1.38         | 0                      | 1.26         | 0                      | 0.24               | 0                            | 0                          |
| BDF1       | 1.29         | 0                      | 0.89         | 0                      | 0.24               | 0                            | 0                          |
| MAE1       | 0.86         | 0                      | 0.13         | 0                      | 0.24               | 0                            | 0                          |
| GLC7       | 1.37         | 0                      | 0.5          | 0                      | 0.24               | 0                            | 0                          |
| EGD1       | 2.61         | 0                      | 0.86         | 0                      | 0.24               | 0                            | 0                          |
| VIP1       | 0.83         | 0                      | 0.21         | 0                      | 0.24               | 0                            | 0                          |
| HEM15      | 1.14         | 0                      | 0.49         | 0                      | 0.24               | 0                            | 0                          |
| COQ1       | 1.29         | 0                      | 0.89         | 0                      | 0.24               | 0                            | 0                          |
| YMR111C    | 1.38         | 0                      | 1.26         | 0                      | 0.24               | 0                            | 0                          |
| RKM3       | 1.38         | 0                      | 1.26         | 0                      | 0.24               | 0                            | 0                          |
| SPT20      | 1.38         | 0                      | 1.26         | 0                      | 0.24               | 0                            | 0                          |

Table S8: Rtr1 WT and Rtr1 *ctk1Δ* SAINT analysis Page 13

| PROTEIN ID | RTR1 WT FC_A | RTR1 <i>ctk1Δ</i> FC_A | RTR1 WT FC_B | RTR1 <i>ctk1Δ</i> FC_B | RTR1 WT SAINT PROB | RTR1 <i>ctk1Δ</i> SAINT PROB | iREF (1=present, 0=absent) |
|------------|--------------|------------------------|--------------|------------------------|--------------------|------------------------------|----------------------------|
| TAO3       | 1.27         | 0                      | 1.05         | 0                      | 0.24               | 0                            | 0                          |
| CDC25      | 1.27         | 0                      | 1.05         | 0                      | 0.24               | 0                            | 0                          |
| TPD3       | 1.32         | 0                      | 0.52         | 0                      | 0.24               | 0                            | 0                          |
| RPL35A     | 1.74         | 0.18                   | 0.08         | 0.05                   | 0.24               | 0                            | 0                          |
| NUP84      | 1.27         | 2.18                   | 1.05         | 1.61                   | 0.24               | 0                            | 0                          |
| MHP1       | 1.29         | 0                      | 0.89         | 0                      | 0.24               | 0                            | 0                          |
| RTT106     | 1.53         | 0                      | 0.65         | 0                      | 0.24               | 0                            | 0                          |
| VPS9       | 1.38         | 0                      | 1.26         | 0                      | 0.24               | 0                            | 0                          |
| RPT3       | 0.96         | 0                      | 0.17         | 0                      | 0.24               | 0                            | 0                          |
| RET1       | 1.38         | 0                      | 1.26         | 0                      | 0.24               | 0                            | 0                          |
| GCD11      | 2.05         | 0.25                   | 0.4          | 0.13                   | 0.24               | 0                            | 0                          |
| POP2       | 1.38         | 0                      | 1.26         | 0                      | 0.24               | 0                            | 0                          |
| PIH1       | 1.38         | 0                      | 1.26         | 0                      | 0.24               | 0                            | 0                          |
| IML2       | 1.29         | 2.03                   | 0.89         | 1.32                   | 0.24               | 0                            | 0                          |
| RPN13      | 1.29         | 0.93                   | 0.43         | 0.47                   | 0.24               | 0                            | 0                          |
| MON2       | 1.38         | 0                      | 1.26         | 0                      | 0.24               | 0                            | 0                          |
| SNU13      | 3.24         | 0                      | 0.88         | 0                      | 0.24               | 0                            | 0                          |
| SCY1       | 1.29         | 0                      | 0.89         | 0                      | 0.24               | 0                            | 0                          |
| ELP6       | 1.38         | 0                      | 1.26         | 0                      | 0.24               | 0                            | 0                          |
| CAF20      | 1.49         | 0                      | 0.63         | 0                      | 0.24               | 0                            | 0                          |
| NOP56      | 3.1          | 0                      | 0.96         | 0                      | 0.24               | 0                            | 0                          |
| GRH1       | 1.27         | 0                      | 1.05         | 0                      | 0.24               | 0                            | 0                          |
| NUG1       | 1.28         | 0.45                   | 0.24         | 0.21                   | 0.24               | 0                            | 0                          |
| URA8       | 1.37         | 0                      | 0.29         | 0                      | 0.24               | 0                            | 0                          |
| SRP21      | 1.38         | 0                      | 1.26         | 0                      | 0.24               | 0                            | 0                          |
| RRP8       | 1.27         | 0                      | 1.05         | 0                      | 0.24               | 0                            | 0                          |
| SIR4       | 1.27         | 0                      | 1.05         | 0                      | 0.24               | 0                            | 0                          |
| SEC18      | 1.18         | 0                      | 0.25         | 0                      | 0.24               | 0                            | 0                          |
| SEC15      | 1.38         | 0                      | 1.26         | 0                      | 0.24               | 0                            | 0                          |
| HIS5       | 1.48         | 0                      | 0.68         | 0                      | 0.24               | 0                            | 0                          |
| PRE9       | 1.06         | 0                      | 0.37         | 0                      | 0.24               | 0                            | 0                          |
| APS3       | 1.38         | 0                      | 1.26         | 0                      | 0.24               | 0                            | 0                          |
| YML19      | 1.55         | 0                      | 0.93         | 0                      | 0.24               | 0                            | 0                          |
| YKR078W    | 1.38         | 0                      | 1.26         | 0                      | 0.24               | 0                            | 0                          |
| SPT15      | 1.27         | 0                      | 1.05         | 0                      | 0.24               | 0                            | 0                          |
| RFA3       | 1.65         | 0                      | 0.58         | 0                      | 0.24               | 0                            | 0                          |
| PCT1       | 1.09         | 0                      | 0.78         | 0                      | 0.24               | 0                            | 0                          |
| SSF1       | 1.38         | 0                      | 1.26         | 0                      | 0.24               | 0                            | 0                          |
| SIS2       | 1.38         | 0                      | 1.26         | 0                      | 0.24               | 0                            | 0                          |
| NOT5       | 1.58         | 0                      | 0.54         | 0                      | 0.24               | 0                            | 0                          |
| AVL9       | 1.38         | 0                      | 1.26         | 0                      | 0.24               | 0                            | 0                          |
| CCT6       | 1.55         | 0.44                   | 0.2          | 0.16                   | 0.24               | 0                            | 0                          |

Table S8: Rtr1 WT and Rtr1 *ctk1Δ* SAINT analysis Page 14

| PROTEIN ID | RTR1 WT FC_A | RTR1 <i>ctk1Δ</i> FC_A | RTR1 WT FC_B | RTR1 <i>ctk1Δ</i> FC_B | RTR1 WT SAINT PROB | RTR1 <i>ctk1Δ</i> SAINT PROB | iREF (1=present, 0=absent) |
|------------|--------------|------------------------|--------------|------------------------|--------------------|------------------------------|----------------------------|
| RVB1       | 0.81         | 0                      | 0.08         | 0                      | 0.24               | 0                            | 0                          |
| INN1       | 1.38         | 0                      | 1.26         | 0                      | 0.24               | 0                            | 0                          |
| YMR1       | 1.38         | 0                      | 1.26         | 0                      | 0.24               | 0                            | 0                          |
| RGR1       | 1.38         | 2.47                   | 1.26         | 1.98                   | 0.24               | 0                            | 0                          |
| SHE2       | 1.38         | 0                      | 1.26         | 0                      | 0.24               | 0                            | 0                          |
| YBP2       | 1.38         | 0                      | 1.26         | 0                      | 0.24               | 0                            | 0                          |
| ARA1       | 1.38         | 0                      | 1.26         | 0                      | 0.24               | 0                            | 0                          |
| ISA1       | 1.74         | 0                      | 1.41         | 0                      | 0.24               | 0                            | 0                          |
| ENP2       | 1.38         | 0                      | 1.26         | 0                      | 0.24               | 0                            | 0                          |
| PAF1       | 1.27         | 0                      | 1.05         | 0                      | 0.24               | 0                            | 0                          |
| MTQ2       | 1.38         | 0                      | 1.26         | 0                      | 0.24               | 0                            | 0                          |
| RAD53      | 1.38         | 0                      | 1.26         | 0                      | 0.24               | 0                            | 0                          |
| PRR1       | 1.38         | 0                      | 1.26         | 0                      | 0.24               | 0                            | 0                          |
| UGA3       | 5.7          | 0                      | 2.11         | 0                      | 0.24               | 0                            | 0                          |
| IES3       | 1.38         | 0                      | 1.26         | 0                      | 0.24               | 0                            | 0                          |
| APT2       | 1.38         | 0                      | 1.26         | 0                      | 0.24               | 0                            | 0                          |
| GYL1       | 1.38         | 0                      | 1.26         | 0                      | 0.24               | 0                            | 0                          |
| ART10      | 1.38         | 0                      | 1.26         | 0                      | 0.24               | 0                            | 0                          |
| SRL2       | 1.38         | 0                      | 1.26         | 0                      | 0.24               | 0                            | 0                          |
| YMR144W    | 1.38         | 0                      | 1.26         | 0                      | 0.24               | 0                            | 0                          |
| SEC3       | 0.93         | 0                      | 0.29         | 0                      | 0.24               | 0                            | 0                          |
| CIN8       | 1.38         | 0                      | 1.26         | 0                      | 0.24               | 0                            | 0                          |
| YLR118C    | 1.38         | 0                      | 1.26         | 0                      | 0.24               | 0                            | 0                          |
| MRM1       | 5.7          | 0                      | 2.11         | 0                      | 0.24               | 0                            | 0                          |
| BIO2       | 1.38         | 0                      | 1.26         | 0                      | 0.24               | 0                            | 0                          |
| ORC2       | 1.38         | 0                      | 1.26         | 0                      | 0.24               | 0                            | 0                          |
| ORC3       | 1.38         | 0                      | 1.26         | 0                      | 0.24               | 0                            | 0                          |
| FLO11      | 1.38         | 0                      | 1.26         | 0                      | 0.24               | 0                            | 0                          |
| END3       | 1.31         | 0.53                   | 0.34         | 0.23                   | 0.23               | 0                            | 0                          |
| CFT1       | 1.34         | 0                      | 0.95         | 0                      | 0.23               | 0                            | 0                          |
| DEF1       | 0.97         | 0                      | 0.41         | 0                      | 0.23               | 0                            | 0                          |
| GCD6       | 1.22         | 0                      | 0.38         | 0                      | 0.23               | 0                            | 0                          |
| RNR3       | 1.35         | 0                      | 0.24         | 0                      | 0.23               | 0                            | 0                          |
| BEM2       | 1.31         | 1.28                   | 0.56         | 0.68                   | 0.23               | 0                            | 0                          |
| MCM2       | 1.04         | 0                      | 0.41         | 0                      | 0.23               | 0                            | 0                          |
| COQ8       | 1.29         | 0                      | 0.5          | 0                      | 0.23               | 0                            | 0                          |
| ACF4       | 1.79         | 0                      | 1.08         | 0                      | 0.23               | 0                            | 0                          |
| GDE1       | 1.34         | 0                      | 0.95         | 0                      | 0.23               | 0                            | 0                          |
| RET3       | 1.12         | 0                      | 0.5          | 0                      | 0.23               | 0                            | 0                          |
| LOC1       | 1.34         | 0                      | 0.96         | 0                      | 0.23               | 0                            | 0                          |
| ARC1       | 1.9          | 0                      | 0.36         | 0                      | 0.23               | 0                            | 0                          |
| YRA1       | 3.64         | 0.35                   | 0.81         | 0.16                   | 0.23               | 0                            | 0                          |



Table S8: Rtr1 WT and Rtr1 *ctk1Δ* SAINT analysis Page 15

| PROTEIN ID | RTR1 WT FC_A | RTR1 <i>ctk1Δ</i> FC_A | RTR1 WT FC_B | RTR1 <i>ctk1Δ</i> FC_B | RTR1 WT SAINT PROB | RTR1 <i>ctk1Δ</i> SAINT PROB | iREF (1=present, 0=absent) |
|------------|--------------|------------------------|--------------|------------------------|--------------------|------------------------------|----------------------------|
| SPN1       | 1.26         | 0                      | 0.27         | 0                      | 0.23               | 0                            | 0                          |
| PDC2       | 1.34         | 0                      | 0.95         | 0                      | 0.23               | 0                            | 0                          |
| YMR315W    | 1.29         | 0                      | 0.7          | 0                      | 0.23               | 0                            | 0                          |
| SUP45      | 0.89         | 0                      | 0.14         | 0                      | 0.23               | 0                            | 0                          |
| RPC19      | 1.43         | 0                      | 0.89         | 0                      | 0.23               | 0                            | 0                          |
| NOP14      | 1.3          | 0                      | 0.61         | 0                      | 0.23               | 0                            | 0                          |
| RPA190     | 1            | 0                      | 0.19         | 0                      | 0.23               | 0                            | 0                          |
| UTP7       | 1.39         | 0                      | 0.88         | 0                      | 0.23               | 0                            | 0                          |
| VMA6       | 1.37         | 0                      | 0.22         | 0                      | 0.23               | 0                            | 0                          |
| TAF6       | 2.33         | 0                      | 0.8          | 0                      | 0.23               | 0                            | 0                          |
| CMS1       | 1.3          | 0                      | 0.61         | 0                      | 0.23               | 0                            | 0                          |
| IVY1       | 2.45         | 0                      | 0.94         | 0                      | 0.22               | 0                            | 0                          |
| YNL208W    | 0.75         | 0                      | 0.16         | 0                      | 0.22               | 0                            | 0                          |
| MDR1       | 0.93         | 0                      | 0.52         | 0                      | 0.22               | 0                            | 0                          |
| RPN6       | 1.08         | 0                      | 0.24         | 0                      | 0.22               | 0                            | 0                          |
| YLL032C    | 1.02         | 0                      | 0.52         | 0                      | 0.22               | 0                            | 0                          |
| DPH6       | 1.2          | 0                      | 0.79         | 0                      | 0.22               | 0                            | 0                          |
| GCD2       | 1.25         | 0                      | 0.52         | 0                      | 0.22               | 0                            | 0                          |
| SRP1       | 0.98         | 0                      | 0.31         | 0                      | 0.22               | 0                            | 0                          |
| SHS1       | 1.18         | 0                      | 0.4          | 0                      | 0.22               | 0                            | 0                          |
| RSC2       | 1.25         | 0                      | 0.52         | 0                      | 0.22               | 0                            | 0                          |
| SUM1       | 1.21         | 0                      | 0.79         | 0                      | 0.22               | 0                            | 0                          |
| RPL37A     | 1.43         | 0                      | 0.39         | 0                      | 0.22               | 0                            | 0                          |
| UBP3       | 3.06         | 0                      | 1.08         | 0                      | 0.22               | 0                            | 0                          |
| HAS1       | 1.64         | 0                      | 0.61         | 0                      | 0.22               | 0                            | 0                          |
| IDH1       | 0.85         | 1.04                   | 0.37         | 0.48                   | 0.22               | 0                            | 0                          |
| SLY1       | 0.92         | 0                      | 0.24         | 0                      | 0.22               | 0                            | 0                          |
| SPE3       | 0.98         | 0                      | 0.56         | 0                      | 0.22               | 0                            | 0                          |
| SEC65      | 1.12         | 0                      | 0.53         | 0                      | 0.22               | 0                            | 0                          |
| RRP6       | 1.16         | 1.56                   | 0.64         | 0.87                   | 0.22               | 0                            | 0                          |
| RSC8       | 0.88         | 0                      | 0.41         | 0                      | 0.22               | 0                            | 0                          |
| NOC3       | 1.2          | 0                      | 0.79         | 0                      | 0.22               | 0                            | 0                          |
| RPO41      | 1.21         | 0                      | 0.46         | 0                      | 0.22               | 0                            | 0                          |
| TRP4       | 1.16         | 0                      | 0.64         | 0                      | 0.22               | 0                            | 0                          |
| TAF11      | 1.16         | 0                      | 0.64         | 0                      | 0.22               | 0                            | 0                          |
| PAT1       | 1.18         | 0                      | 0.68         | 0                      | 0.22               | 0                            | 0                          |
| TAP42      | 1.07         | 12.15                  | 0.41         | 1.9                    | 0.21               | 0.5                          | 0                          |
| ATP11      | 1.15         | 0                      | 0.51         | 0                      | 0.21               | 0                            | 0                          |
| NOP7       | 1.81         | 0                      | 0.89         | 0                      | 0.21               | 0                            | 0                          |
| SPA2       | 1.09         | 0                      | 0.26         | 0                      | 0.21               | 0                            | 0                          |
| BUL2       | 0.95         | 0                      | 0.54         | 0                      | 0.21               | 0                            | 0                          |
| EMW1       | 1.25         | 0                      | 0.84         | 0                      | 0.21               | 0                            | 0                          |

Table S8: Rtr1 WT and Rtr1 *ctk1Δ* SAINT analysis Page 16

| PROTEIN ID | RTR1 WT FC_A | RTR1 <i>ctk1Δ</i> FC_A | RTR1 WT FC_B | RTR1 <i>ctk1Δ</i> FC_B | RTR1 WT SAINT PROB | RTR1 <i>ctk1Δ</i> SAINT PROB | iREF (1=present, 0=absent) |
|------------|--------------|------------------------|--------------|------------------------|--------------------|------------------------------|----------------------------|
| RSC4       | 0.55         | 0                      | 0.21         | 0                      | 0.21               | 0                            | 0                          |
| MAK31      | 1.09         | 0                      | 0.64         | 0                      | 0.21               | 0                            | 0                          |
| NOP15      | 1.23         | 0                      | 0.71         | 0                      | 0.21               | 0                            | 0                          |
| COP1       | 1.21         | 0                      | 0.23         | 0                      | 0.21               | 0                            | 0                          |
| GEA2       | 0.74         | 0.9                    | 0.34         | 0.45                   | 0.21               | 0                            | 0                          |
| MKT1       | 0.64         | 0.65                   | 0.27         | 0.33                   | 0.21               | 0                            | 0                          |
| BNA3       | 1.05         | 0                      | 0.46         | 0                      | 0.21               | 0                            | 0                          |
| DUO1       | 1.25         | 0                      | 0.84         | 0                      | 0.21               | 0                            | 0                          |
| PAN1       | 2.12         | 0                      | 0.49         | 0                      | 0.21               | 0                            | 0                          |
| MCM4       | 0.93         | 0                      | 0.33         | 0                      | 0.21               | 0                            | 0                          |
| RCY1       | 1.12         | 1.42                   | 0.54         | 0.73                   | 0.21               | 0                            | 0                          |
| SFM1       | 1.26         | 0                      | 0.59         | 0                      | 0.21               | 0                            | 0                          |
| SIN3       | 1.23         | 0                      | 0.61         | 0                      | 0.21               | 0                            | 0                          |
| COG3       | 0.87         | 2.14                   | 0.47         | 1.35                   | 0.21               | 0                            | 0                          |
| CDC55      | 1.24         | 0                      | 0.83         | 0                      | 0.21               | 0                            | 0                          |
| SWC4       | 0.92         | 0                      | 0.51         | 0                      | 0.21               | 0                            | 0                          |
| CCT8       | 0.94         | 0.13                   | 0.15         | 0.07                   | 0.21               | 0                            | 0                          |
| CCT7       | 0.88         | 0.55                   | 0.12         | 0.15                   | 0.21               | 0                            | 0                          |
| ADE6       | 1.13         | 1.05                   | 0.27         | 0.36                   | 0.21               | 0                            | 0                          |
| RAD51      | 1.25         | 0                      | 0.84         | 0                      | 0.21               | 0                            | 0                          |
| YGL039W    | 1.07         | 0                      | 0.49         | 0                      | 0.21               | 0                            | 0                          |
| GBP2       | 3.51         | 0                      | 0.95         | 0                      | 0.21               | 0                            | 0                          |
| MRT4       | 1.04         | 0                      | 0.32         | 0                      | 0.21               | 0                            | 0                          |
| MCM7       | 1.12         | 2.4                    | 0.67         | 1.2                    | 0.2                | 0.16                         | 0                          |
| IMP2_P     | 1.13         | 0                      | 0.84         | 0                      | 0.2                | 0                            | 0                          |
| SMD2       | 1.13         | 0                      | 0.84         | 0                      | 0.2                | 0                            | 0                          |
| SGN1       | 4.84         | 0                      | 1.49         | 0                      | 0.2                | 0                            | 0                          |
| FKH2       | 1.13         | 0                      | 0.84         | 0                      | 0.2                | 0                            | 0                          |
| YMR226C    | 1.05         | 0                      | 0.52         | 0                      | 0.2                | 0                            | 0                          |
| LSM2       | 1.02         | 0                      | 0.4          | 0                      | 0.2                | 0                            | 0                          |
| DIS3       | 1.13         | 0                      | 0.79         | 0                      | 0.2                | 0                            | 0                          |
| SAR1       | 0.79         | 0.43                   | 0.08         | 0.07                   | 0.2                | 0                            | 0                          |
| VHR2       | 1.13         | 0                      | 0.84         | 0                      | 0.2                | 0                            | 0                          |
| RNT1       | 0.9          | 0                      | 0.56         | 0                      | 0.2                | 0                            | 0                          |
| YHR097C    | 1.13         | 0                      | 0.84         | 0                      | 0.2                | 0                            | 0                          |
| TFC4       | 1.48         | 0                      | 1            | 0                      | 0.2                | 0                            | 0                          |
| RRP5       | 1.12         | 0                      | 0.37         | 0                      | 0.2                | 0                            | 0                          |
| YML16      | 1.13         | 0                      | 0.84         | 0                      | 0.2                | 0                            | 0                          |
| SSF2       | 1.17         | 0                      | 0.89         | 0                      | 0.2                | 0                            | 0                          |
| YNL155W    | 1.13         | 0                      | 0.84         | 0                      | 0.2                | 0                            | 0                          |
| PUP1       | 1.16         | 0                      | 0.74         | 0                      | 0.2                | 0                            | 0                          |
| DBF2       | 1.17         | 0                      | 0.89         | 0                      | 0.2                | 0                            | 0                          |

Table S8: Rtr1 WT and Rtr1 *ctk1Δ* SAINT analysis Page 17

| PROTEIN ID | RTR1 WT FC_A | RTR1 <i>ctk1Δ</i> FC_A | RTR1 WT FC_B | RTR1 <i>ctk1Δ</i> FC_B | RTR1 WT SAINT PROB | RTR1 <i>ctk1Δ</i> SAINT PROB | iREF (1=present, 0=absent) |
|------------|--------------|------------------------|--------------|------------------------|--------------------|------------------------------|----------------------------|
| MAS2       | 1.17         | 0                      | 0.89         | 0                      | 0.2                | 0                            | 0                          |
| BBC1       | 1.09         | 0                      | 0.52         | 0                      | 0.2                | 0                            | 0                          |
| OM45       | 1.43         | 0                      | 0.93         | 0                      | 0.2                | 0                            | 0                          |
| PPM1       | 1.17         | 0                      | 0.89         | 0                      | 0.2                | 0                            | 0                          |
| PGA3       | 1.77         | 0                      | 0.96         | 0                      | 0.19               | 0                            | 0                          |
| CAP1       | 1.22         | 0                      | 0.59         | 0                      | 0.19               | 0                            | 0                          |
| PUF3       | 1.12         | 0                      | 0.61         | 0                      | 0.19               | 0                            | 0                          |
| KRR1       | 1.07         | 0                      | 0.56         | 0                      | 0.19               | 0                            | 0                          |
| SET2       | 1.09         | 0                      | 0.67         | 0                      | 0.19               | 0                            | 1                          |
| MRS6       | 1.12         | 0                      | 0.61         | 0                      | 0.19               | 0                            | 0                          |
| HSE1       | 1.07         | 1.44                   | 0.56         | 0.77                   | 0.19               | 0                            | 0                          |
| TAF10      | 1.29         | 0                      | 0.78         | 0                      | 0.19               | 0                            | 0                          |
| SRP68      | 0.74         | 0                      | 0.29         | 0                      | 0.19               | 0                            | 0                          |
| BNI1       | 1.04         | 0                      | 0.54         | 0                      | 0.18               | 0                            | 0                          |
| SPT5       | 2.8          | 0                      | 0.9          | 0                      | 0.18               | 0                            | 1                          |
| UBP2       | 1.04         | 0                      | 0.54         | 0                      | 0.18               | 0                            | 0                          |
| OXPI       | 1.01         | 0                      | 0.52         | 0                      | 0.18               | 0                            | 0                          |
| NUP188     | 1.03         | 0                      | 0.61         | 0                      | 0.18               | 0                            | 0                          |
| SLH1       | 1.03         | 0                      | 0.61         | 0                      | 0.18               | 0                            | 0                          |
| KIN1       | 0.62         | 0                      | 0.27         | 0                      | 0.18               | 0                            | 0                          |
| RBG1       | 0.77         | 0                      | 0.42         | 0                      | 0.17               | 0                            | 0                          |
| RBL2       | 1.09         | 0                      | 0.67         | 0                      | 0.17               | 0                            | 0                          |
| SSK2       | 0.48         | 0                      | 0.23         | 0                      | 0.17               | 0                            | 0                          |
| ATP2       | 1.11         | 0.47                   | 0.13         | 0.09                   | 0.17               | 0                            | 0                          |
| LPD1       | 0.95         | 0                      | 0.26         | 0                      | 0.17               | 0                            | 0                          |
| GND1       | 2.46         | 1.1                    | 0.8          | 0.32                   | 0.17               | 0                            | 0                          |
| CHS5       | 1.09         | 0                      | 0.67         | 0                      | 0.17               | 0                            | 0                          |
| SEC21      | 0.83         | 0.38                   | 0.21         | 0.2                    | 0.17               | 0                            | 0                          |
| PRS4       | 1            | 0                      | 0.49         | 0                      | 0.17               | 0                            | 0                          |
| EAF3       | 0.77         | 2.08                   | 0.44         | 0.89                   | 0.16               | 0.32                         | 0                          |
| NOP1       | 4.47         | 0                      | 0.93         | 0                      | 0.16               | 0                            | 0                          |
| ENT5       | 1.06         | 0                      | 0.74         | 0                      | 0.16               | 0                            | 0                          |
| MET5       | 0.51         | 0                      | 0.23         | 0                      | 0.16               | 0                            | 0                          |
| BMS1       | 1.09         | 0                      | 0.78         | 0                      | 0.16               | 0                            | 0                          |
| AFG2       | 0.95         | 0                      | 0.53         | 0                      | 0.16               | 0                            | 0                          |
| YGR266W    | 1.06         | 1.89                   | 0.74         | 1.16                   | 0.16               | 0                            | 0                          |
| SMC2       | 0.68         | 0                      | 0.37         | 0                      | 0.16               | 0                            | 0                          |
| TMA64      | 1.06         | 0                      | 0.74         | 0                      | 0.16               | 0                            | 0                          |
| ARL1       | 0.95         | 0                      | 0.53         | 0                      | 0.16               | 0                            | 0                          |
| DIG1       | 0.99         | 0                      | 0.5          | 0                      | 0.16               | 0                            | 0                          |
| YGP1       | 0.77         | 0                      | 0.44         | 0                      | 0.16               | 0                            | 0                          |
| IMG1       | 1.06         | 0                      | 0.74         | 0                      | 0.16               | 0                            | 0                          |

Table S8: Rtr1 WT and Rtr1 *ctk1Δ* SAINT analysis Page 18

| PROTEIN ID | RTR1 WT FC_A | RTR1 <i>ctk1Δ</i> FC_A | RTR1 WT FC_B | RTR1 <i>ctk1Δ</i> FC_B | RTR1 WT SAINT PROB | RTR1 <i>ctk1Δ</i> SAINT PROB | iREF (1=present, 0=absent) |
|------------|--------------|------------------------|--------------|------------------------|--------------------|------------------------------|----------------------------|
| YIR035C    | 1.06         | 0                      | 0.74         | 0                      | 0.16               | 0                            | 0                          |
| SNF4       | 0.95         | 0                      | 0.53         | 0                      | 0.16               | 0                            | 0                          |
| PRO3       | 0.54         | 0                      | 0.27         | 0                      | 0.15               | 0                            | 0                          |
| ASC1       | 0.58         | 0                      | 0.16         | 0                      | 0.15               | 0                            | 0                          |
| MIS1       | 0.98         | 0                      | 0.56         | 0                      | 0.15               | 0                            | 0                          |
| PAA1       | 0.92         | 0.66                   | 0.27         | 0.29                   | 0.15               | 0                            | 0                          |
| SFB2       | 0.78         | 0                      | 0.46         | 0                      | 0.15               | 0                            | 0                          |
| ALD6       | 0.45         | 0                      | 0.14         | 0                      | 0.15               | 0                            | 0                          |
| INP53      | 1            | 0                      | 0.63         | 0                      | 0.15               | 0                            | 0                          |
| TPS2       | 1.35         | 1.47                   | 0.29         | 0.45                   | 0.14               | 0                            | 0                          |
| ADI1       | 0.96         | 0                      | 0.62         | 0                      | 0.14               | 0                            | 0                          |
| ATG17      | 0.96         | 0                      | 0.62         | 0                      | 0.14               | 0                            | 0                          |
| MCM6       | 0.79         | 0                      | 0.35         | 0                      | 0.14               | 0                            | 0                          |
| YJU2       | 0.96         | 0                      | 0.62         | 0                      | 0.14               | 0                            | 0                          |
| LAT1       | 1.05         | 1.63                   | 0.24         | 0.32                   | 0.14               | 0                            | 0                          |
| HAP5       | 0.96         | 0                      | 0.62         | 0                      | 0.14               | 0                            | 0                          |
| SCL1       | 0.89         | 0                      | 0.32         | 0                      | 0.13               | 0                            | 0                          |
| PRO2       | 0.99         | 0                      | 0.66         | 0                      | 0.13               | 0                            | 0                          |
| ABF2       | 1.38         | 0                      | 0.36         | 0                      | 0.13               | 0                            | 0                          |
| NUP2       | 0.91         | 0                      | 0.41         | 0                      | 0.13               | 0                            | 0                          |
| PIK1       | 0.92         | 0                      | 0.51         | 0                      | 0.13               | 0                            | 0                          |
| CDC10      | 0.76         | 0                      | 0.33         | 0                      | 0.13               | 0                            | 0                          |
| NIF3       | 0.36         | 0                      | 0.17         | 0                      | 0.13               | 0                            | 0                          |
| YNK1       | 0.91         | 0                      | 0.5          | 0                      | 0.13               | 0                            | 0                          |
| RPT2       | 0.77         | 0                      | 0.16         | 0                      | 0.13               | 0                            | 0                          |
| RET2       | 0.9          | 0                      | 0.57         | 0                      | 0.13               | 0                            | 0                          |
| CDC33      | 0.65         | 0                      | 0.16         | 0                      | 0.13               | 0                            | 0                          |
| SCD6       | 1.3          | 0                      | 0.32         | 0                      | 0.13               | 0                            | 0                          |
| GLR1       | 0.93         | 0                      | 0.55         | 0                      | 0.13               | 0                            | 0                          |
| SGT1       | 0.99         | 1.71                   | 0.74         | 1.13                   | 0.13               | 0                            | 0                          |
| GIN4       | 0.99         | 0                      | 0.66         | 0                      | 0.13               | 0                            | 0                          |
| FAP7       | 0.88         | 0                      | 0.41         | 0                      | 0.13               | 0                            | 0                          |
| MRI1       | 0.97         | 0                      | 0.37         | 0                      | 0.12               | 0                            | 0                          |
| RAD23      | 0.88         | 0                      | 0.48         | 0                      | 0.12               | 0                            | 0                          |
| RPT4       | 0.76         | 0.75                   | 0.26         | 0.29                   | 0.12               | 0                            | 0                          |
| PAL1       | 0.96         | 0                      | 0.63         | 0                      | 0.12               | 0                            | 0                          |
| DOP1       | 0.84         | 0                      | 0.44         | 0                      | 0.12               | 0                            | 0                          |
| PRS2       | 0.76         | 2.16                   | 0.43         | 0.9                    | 0.11               | 0.21                         | 0                          |
| YKL033W_A  | 0.91         | 0                      | 0.57         | 0                      | 0.11               | 0                            | 0                          |
| NOP4       | 0.91         | 0                      | 0.57         | 0                      | 0.11               | 0                            | 0                          |
| PBI2       | 0.91         | 0                      | 0.57         | 0                      | 0.11               | 0                            | 0                          |
| NUP157     | 0.91         | 0                      | 0.57         | 0                      | 0.11               | 0                            | 0                          |

Table S8: Rtr1 WT and Rtr1 *ctk1Δ* SAINT analysis Page 19

| PROTEIN ID | RTR1 WT FC_A | RTR1 <i>ctk1Δ</i> FC_A | RTR1 WT FC_B | RTR1 <i>ctk1Δ</i> FC_B | RTR1 WT SAINT PROB | RTR1 <i>ctk1Δ</i> SAINT PROB | iREF (1=present, 0=absent) |
|------------|--------------|------------------------|--------------|------------------------|--------------------|------------------------------|----------------------------|
| RDH54      | 0.91         | 0                      | 0.57         | 0                      | 0.11               | 0                            | 0                          |
| RPA12      | 0.94         | 0                      | 0.6          | 0                      | 0.11               | 0                            | 0                          |
| CAB5       | 0.91         | 0                      | 0.57         | 0                      | 0.11               | 0                            | 0                          |
| ATP10      | 0.88         | 2.2                    | 0.51         | 1                      | 0.1                | 0.07                         | 0                          |
| LSM1       | 0.89         | 0                      | 0.55         | 0                      | 0.1                | 0                            | 0                          |
| CMK2       | 1.54         | 0.37                   | 0.39         | 0.19                   | 0.1                | 0                            | 0                          |
| YTM1       | 0.72         | 0                      | 0.42         | 0                      | 0.1                | 0                            | 0                          |
| SED5       | 0.85         | 1.19                   | 0.4          | 0.56                   | 0.1                | 0                            | 0                          |
| ARO4       | 0.69         | 0.63                   | 0.19         | 0.37                   | 0.1                | 0                            | 0                          |
| MPP10      | 0.93         | 1.61                   | 0.66         | 1.01                   | 0.1                | 0                            | 0                          |
| CAJ1       | 1.42         | 0.2                    | 0.27         | 0.09                   | 0.1                | 0                            | 0                          |
| SAP155     | 0.84         | 0                      | 0.5          | 0                      | 0.1                | 0                            | 0                          |
| KIN2       | 0.84         | 0                      | 0.5          | 0                      | 0.1                | 0                            | 0                          |
| COG7       | 0.71         | 1.59                   | 0.39         | 0.72                   | 0.09               | 0.02                         | 0                          |
| IP13       | 0.84         | 0                      | 0.38         | 0                      | 0.09               | 0                            | 0                          |
| SPT6       | 0.72         | 0                      | 0.23         | 0                      | 0.09               | 0                            | 0                          |
| SHE3       | 0.81         | 0                      | 0.44         | 0                      | 0.09               | 0                            | 0                          |
| GLK1       | 0.82         | 0                      | 0.32         | 0                      | 0.09               | 0                            | 0                          |
| MRPS17     | 0.83         | 0                      | 0.34         | 0                      | 0.09               | 0                            | 0                          |
| BZZ1       | 0.86         | 6.09                   | 0.52         | 1.78                   | 0.08               | 0.49                         | 0                          |
| SPB1       | 0.58         | 0                      | 0.25         | 0                      | 0.08               | 0                            | 0                          |
| RXT2       | 0.86         | 0                      | 0.52         | 0                      | 0.08               | 0                            | 0                          |
| LSM6       | 0.88         | 0                      | 0.59         | 0                      | 0.08               | 0                            | 0                          |
| RPN12      | 0.87         | 0                      | 0.19         | 0                      | 0.08               | 0                            | 0                          |
| TWF1       | 0.83         | 0                      | 0.18         | 0                      | 0.08               | 0                            | 0                          |
| TSR4       | 0.88         | 0                      | 0.6          | 0                      | 0.08               | 0                            | 0                          |
| CCT4       | 0.56         | 1.18                   | 0.12         | 0.35                   | 0.08               | 0                            | 0                          |
| YGR126W    | 0.35         | 0                      | 0.14         | 0                      | 0.07               | 0                            | 0                          |
| CCT5       | 0.62         | 0                      | 0.12         | 0                      | 0.07               | 0                            | 0                          |
| PGD1       | 1.43         | 0                      | 0.71         | 0                      | 0.07               | 0                            | 0                          |
| NOP2       | 0.79         | 0                      | 0.31         | 0                      | 0.06               | 0                            | 0                          |
| RPN2       | 0.8          | 0                      | 0.27         | 0                      | 0.06               | 0                            | 0                          |
| EBP2       | 0.84         | 0                      | 0.55         | 0                      | 0.06               | 0                            | 1                          |
| URA2       | 1.13         | 0.05                   | 0.22         | 0.03                   | 0.06               | 0                            | 1                          |
| TAF14      | 0.82         | 0                      | 0.47         | 0                      | 0.06               | 0                            | 1                          |
| CSE1       | 0.59         | 0.71                   | 0.26         | 0.34                   | 0.06               | 0                            | 0                          |
| NAT1       | 1.7          | 0                      | 0.3          | 0                      | 0.06               | 0                            | 0                          |
| CYS3       | 0.45         | 0                      | 0.17         | 0                      | 0.06               | 0                            | 0                          |
| SCP1       | 0.77         | 0                      | 0.29         | 0                      | 0.06               | 0                            | 0                          |
| BFR2       | 0.78         | 0                      | 0.36         | 0                      | 0.05               | 0                            | 0                          |
| PEP4       | 2.97         | 0.2                    | 0.67         | 0.09                   | 0.05               | 0                            | 0                          |
| PUB1       | 0.81         | 0                      | 0.28         | 0                      | 0.05               | 0                            | 0                          |

Table S8: Rtr1 WT and Rtr1 *ctk1Δ* SAINT analysis Page 20

| PROTEIN ID | RTR1 WT FC_A | RTR1 <i>ctk1Δ</i> FC_A | RTR1 WT FC_B | RTR1 <i>ctk1Δ</i> FC_B | RTR1 WT SAINT PROB | RTR1 <i>ctk1Δ</i> SAINT PROB | iREF (1=present, 0=absent) |
|------------|--------------|------------------------|--------------|------------------------|--------------------|------------------------------|----------------------------|
| RRP15      | 1            | 0                      | 0.56         | 0                      | 0.05               | 0                            | 0                          |
| ARP3       | 0.69         | 0                      | 0.29         | 0                      | 0.05               | 0                            | 0                          |
| NOP12      | 0.8          | 0                      | 0.49         | 0                      | 0.05               | 0                            | 0                          |
| DOT5       | 0.81         | 0                      | 0.52         | 0                      | 0.05               | 0                            | 0                          |
| TIM9       | 0.41         | 0                      | 0.16         | 0                      | 0.04               | 0                            | 0                          |
| PYK2       | 0.79         | 0                      | 0.31         | 0                      | 0.04               | 0                            | 0                          |
| SST2       | 0.75         | 0                      | 0.43         | 0                      | 0.04               | 0                            | 0                          |
| DAP1       | 0.79         | 0                      | 0.51         | 0                      | 0.04               | 0                            | 0                          |
| LSM5       | 0.78         | 0                      | 0.48         | 0                      | 0.04               | 0                            | 0                          |
| AIF1       | 0.68         | 0                      | 0.37         | 0                      | 0.04               | 0                            | 0                          |
| RPA43      | 0.77         | 0                      | 0.48         | 0                      | 0.04               | 0                            | 0                          |
| UTP15      | 0.74         | 0                      | 0.45         | 0                      | 0.03               | 0                            | 0                          |
| DIM1       | 0.92         | 0                      | 0.42         | 0                      | 0.03               | 0                            | 0                          |
| MCM5       | 0.68         | 0                      | 0.24         | 0                      | 0.03               | 0                            | 0                          |
| SAH1       | 0.6          | 0                      | 0.2          | 0                      | 0.03               | 0                            | 0                          |
| RSR1       | 0.71         | 0                      | 0.39         | 0                      | 0.03               | 0                            | 0                          |
| SMC1       | 0.52         | 0                      | 0.23         | 0                      | 0.03               | 0                            | 0                          |
| HMO1       | 0.76         | 0                      | 0.3          | 0                      | 0.03               | 0                            | 0                          |
| CYR1       | 0.71         | 1.26                   | 0.39         | 0.61                   | 0.03               | 0                            | 0                          |
| LYS4       | 0.89         | 0                      | 0.44         | 0                      | 0.03               | 0                            | 0                          |
| PHO85      | 0.69         | 0                      | 0.34         | 0                      | 0.03               | 0                            | 0                          |
| FAA4       | 0.58         | 0                      | 0.14         | 0                      | 0.03               | 0                            | 0                          |
| CPR1       | 0.38         | 0.46                   | 0.14         | 0.18                   | 0.02               | 0                            | 0                          |
| MTR4       | 0.65         | 0                      | 0.25         | 0                      | 0.02               | 0                            | 0                          |
| RPO31      | 0.69         | 0                      | 0.4          | 0                      | 0.02               | 0                            | 0                          |
| AIM41      | 0.74         | 0.64                   | 0.23         | 0.27                   | 0.02               | 0                            | 0                          |
| UBC1       | 0.67         | 0                      | 0.37         | 0                      | 0.02               | 0                            | 0                          |
| GET3       | 0.46         | 0.36                   | 0.16         | 0.19                   | 0.02               | 0                            | 0                          |
| YML44      | 0.66         | 0                      | 0.29         | 0                      | 0.02               | 0                            | 0                          |
| IRC2       | 0.65         | 0                      | 0.29         | 0                      | 0.02               | 0                            | 0                          |
| SRV2       | 0.95         | 1.05                   | 0.21         | 0.24                   | 0.02               | 0                            | 0                          |
| IKI3       | 0.68         | 0                      | 0.28         | 0                      | 0.02               | 0                            | 0                          |
| ARC19      | 0.68         | 0                      | 0.39         | 0                      | 0.02               | 0                            | 0                          |
| AHP1       | 0.33         | 1.89                   | 0.11         | 0.35                   | 0.01               | 0.08                         | 0                          |
| VAC8       | 0.65         | 1.76                   | 0.46         | 0.93                   | 0.01               | 0.03                         | 0                          |
| RPN7       | 0.96         | 0                      | 0.46         | 0                      | 0.01               | 0                            | 0                          |
| RPS16A     | 1.3          | 0.47                   | 0.26         | 0.09                   | 0.01               | 0                            | 0                          |
| GGA1       | 0.62         | 1.07                   | 0.33         | 0.5                    | 0.01               | 0                            | 0                          |
| EMG1       | 0.63         | 0                      | 0.35         | 0                      | 0.01               | 0                            | 0                          |
| PHB1       | 1.22         | 0                      | 0.48         | 0                      | 0.01               | 0                            | 0                          |
| TIM44      | 1.38         | 0                      | 0.36         | 0                      | 0.01               | 0                            | 0                          |
| RSM7       | 0.73         | 0                      | 0.47         | 0                      | 0.01               | 0                            | 0                          |

Table S8: Rtr1 WT and Rtr1 *ctk1Δ* SAINT analysis Page 21

| PROTEIN ID | RTR1 WT FC_A | RTR1 <i>ctk1Δ</i> FC_A | RTR1 WT FC_B | RTR1 <i>ctk1Δ</i> FC_B | RTR1 WT SAINT PROB | RTR1 <i>ctk1Δ</i> SAINT PROB | iREF (1=present, 0=absent) |
|------------|--------------|------------------------|--------------|------------------------|--------------------|------------------------------|----------------------------|
| TRM44      | 0.61         | 0                      | 0.34         | 0                      | 0.01               | 0                            | 0                          |
| NAB6       | 0.42         | 0                      | 0.24         | 0                      | 0.01               | 0                            | 0                          |
| SAS10      | 0.64         | 0                      | 0.4          | 0                      | 0.01               | 0                            | 0                          |
| SUI2       | 1.06         | 0                      | 0.39         | 0                      | 0.01               | 0                            | 0                          |
| TIF6       | 0.64         | 0                      | 0.37         | 0                      | 0.01               | 0                            | 0                          |
| SWC7       | 0.68         | 0                      | 0.42         | 0                      | 0.01               | 0                            | 0                          |
| RFS1       | 0.52         | 0                      | 0.24         | 0                      | 0.01               | 0                            | 0                          |
| MRP1       | 0.54         | 0                      | 0.29         | 0                      | 0.01               | 0                            | 0                          |
| HEK2       | 0.31         | 0                      | 0.07         | 0                      | 0.01               | 0                            | 0                          |
| TOM1       | 0            | 5.7                    | 0            | 2.54                   | 0                  | 0.52                         | 0                          |
| MSS2       | 0            | 92.05                  | 0            | 13.53                  | 0                  | 0.5                          | 0                          |
| YOR093C    | 0            | 7.89                   | 0            | 3.84                   | 0                  | 0.5                          | 0                          |
| PDR10      | 0            | 11.28                  | 0            | 4.64                   | 0                  | 0.5                          | 0                          |
| BUD21      | 0            | 6.87                   | 0            | 3.57                   | 0                  | 0.5                          | 0                          |
| SPC97      | 0            | 27.43                  | 0            | 7.34                   | 0                  | 0.5                          | 0                          |
| MVP1       | 0            | 4.97                   | 0            | 2.6                    | 0                  | 0.5                          | 0                          |
| TOS8       | 0            | 566.37                 | 0            | 33.64                  | 0                  | 0.5                          | 0                          |
| DYN1       | 1.09         | 4.97                   | 0.96         | 2.6                    | 0                  | 0.5                          | 0                          |
| PXL1       | 0            | 9.81                   | 0            | 4.32                   | 0                  | 0.5                          | 0                          |
| PHO3       | 0            | 12.75                  | 0            | 4.95                   | 0                  | 0.5                          | 0                          |
| ATG5       | 0            | 165.47                 | 0            | 18.16                  | 0                  | 0.5                          | 0                          |
| SRB8       | 0            | 40.65                  | 0            | 8.96                   | 0                  | 0.5                          | 0                          |
| ATF1       | 0            | 62.41                  | 0            | 5.79                   | 0                  | 0.5                          | 0                          |
| UGA1       | 0            | 12.75                  | 0            | 4.95                   | 0                  | 0.5                          | 0                          |
| VPH2       | 0            | 46.91                  | 0            | 8.37                   | 0                  | 0.5                          | 0                          |
| YJR039W    | 0            | 15.68                  | 0            | 5.51                   | 0                  | 0.5                          | 0                          |
| EXO5       | 0            | 24.5                   | 0            | 6.93                   | 0                  | 0.5                          | 0                          |
| MSH5       | 0            | 18.62                  | 0            | 6.02                   | 0                  | 0.5                          | 0                          |
| CDC15      | 0            | 6.87                   | 0            | 3.57                   | 0                  | 0.5                          | 0                          |
| YLR063W    | 0            | 8.06                   | 0            | 2.86                   | 0                  | 0.5                          | 0                          |
| SHQ1       | 0            | 31.84                  | 0            | 7.92                   | 0                  | 0.5                          | 0                          |
| YGR283C    | 0            | 8.34                   | 0            | 3.96                   | 0                  | 0.5                          | 0                          |
| EMP70      | 0.68         | 10.07                  | 0.46         | 2.35                   | 0                  | 0.5                          | 0                          |
| VPS35      | 0            | 13.07                  | 0            | 4.34                   | 0                  | 0.5                          | 0                          |
| YOR111W    | 0            | 11.74                  | 0            | 4.13                   | 0                  | 0.5                          | 0                          |
| RIB2       | 2.16         | 5.41                   | 1.54         | 3.13                   | 0                  | 0.5                          | 0                          |
| CSF1       | 0            | 6.87                   | 0            | 3.57                   | 0                  | 0.5                          | 0                          |
| AFI1       | 0            | 18.62                  | 0            | 6.02                   | 0                  | 0.5                          | 0                          |
| YMR295C    | 0            | 25.79                  | 0            | 7.11                   | 0                  | 0.5                          | 0                          |
| REX3       | 0            | 122.89                 | 0            | 15.65                  | 0                  | 0.5                          | 0                          |
| YIP5       | 0            | 40.24                  | 0            | 5.49                   | 0                  | 0.5                          | 0                          |
| CFT2       | 1.19         | 6.87                   | 1.15         | 3.57                   | 0                  | 0.5                          | 0                          |

Table S8: Rtr1 WT and Rtr1 *ctk1Δ* SAINT analysis Page 22

| PROTEIN ID | RTR1 WT FC_A | RTR1 <i>ctk1Δ</i> FC_A | RTR1 WT FC_B | RTR1 <i>ctk1Δ</i> FC_B | RTR1 WT SAINT PROB | RTR1 <i>ctk1Δ</i> SAINT PROB | iREF (1=present, 0=absent) |
|------------|--------------|------------------------|--------------|------------------------|--------------------|------------------------------|----------------------------|
| BRN1       | 0            | 5.41                   | 0            | 3.13                   | 0                  | 0.5                          | 0                          |
| TID3       | 1.19         | 6.87                   | 1.15         | 3.57                   | 0                  | 0.5                          | 0                          |
| BCK1       | 0            | 56.8                   | 0            | 10.61                  | 0                  | 0.5                          | 0                          |
| HXT8       | 0            | 5.41                   | 0            | 3.13                   | 0                  | 0.5                          | 0                          |
| POL32      | 0            | 8.34                   | 0            | 3.96                   | 0                  | 0.5                          | 0                          |
| BPH1       | 0            | 20.09                  | 0            | 6.26                   | 0                  | 0.5                          | 0                          |
| RTN2       | 0            | 5.13                   | 0            | 3.04                   | 0                  | 0.5                          | 0                          |
| PCD1       | 0            | 5.41                   | 0            | 3.13                   | 0                  | 0.5                          | 0                          |
| PHO84      | 0            | 10.59                  | 0            | 3.14                   | 0                  | 0.5                          | 0                          |
| SFI1       | 0            | 9.26                   | 0            | 4.19                   | 0                  | 0.5                          | 0                          |
| PGK1       | 0.87         | 29                     | 0.47         | 7.67                   | 0                  | 0.5                          | 0                          |
| FRE7       | 0            | 23.03                  | 0            | 6.71                   | 0                  | 0.5                          | 0                          |
| ARG7       | 0            | 10.47                  | 0            | 3.28                   | 0                  | 0.5                          | 0                          |
| BIO3       | 1.19         | 8.34                   | 1.15         | 3.96                   | 0                  | 0.5                          | 0                          |
| BIO4       | 0            | 8.34                   | 0            | 3.96                   | 0                  | 0.5                          | 0                          |
| TOR1       | 1.19         | 56.8                   | 1.15         | 10.61                  | 0                  | 0.5                          | 0                          |
| UPC2       | 0.88         | 4.81                   | 0.63         | 1.9                    | 0                  | 0.49                         | 0                          |
| LEU2       | 0.47         | 4.7                    | 0.22         | 0.85                   | 0                  | 0.49                         | 0                          |
| RPS26B     | 0            | 7.24                   | 0            | 1.47                   | 0                  | 0.49                         | 0                          |
| WAR1       | 0            | 5.64                   | 0            | 2.37                   | 0                  | 0.49                         | 0                          |
| UGP1       | 0.25         | 7.91                   | 0.14         | 0.95                   | 0                  | 0.49                         | 0                          |
| SPC72      | 0            | 3.94                   | 0            | 2.62                   | 0                  | 0.48                         | 0                          |
| HSH49      | 0            | 3.94                   | 0            | 2.62                   | 0                  | 0.48                         | 0                          |
| PRM2       | 0            | 3.94                   | 0            | 2.62                   | 0                  | 0.48                         | 0                          |
| PEP5       | 0            | 3.62                   | 0            | 2.17                   | 0                  | 0.48                         | 0                          |
| SPP41      | 0            | 4.44                   | 0            | 2.08                   | 0                  | 0.48                         | 0                          |
| PPE1       | 0            | 3.94                   | 0            | 2.62                   | 0                  | 0.48                         | 0                          |
| SYG1       | 0            | 3.62                   | 0            | 2.17                   | 0                  | 0.48                         | 0                          |
| FUI1       | 0            | 3.75                   | 0            | 2.55                   | 0                  | 0.48                         | 0                          |
| BIG1       | 0            | 3.94                   | 0            | 2.62                   | 0                  | 0.48                         | 0                          |
| PUS1       | 0.98         | 4.44                   | 0.76         | 2.08                   | 0                  | 0.48                         | 0                          |
| PSO2       | 0            | 3.75                   | 0            | 2.55                   | 0                  | 0.48                         | 0                          |
| IRA1       | 0            | 3.94                   | 0            | 2.62                   | 0                  | 0.48                         | 0                          |
| SAK1       | 0            | 3.75                   | 0            | 2.55                   | 0                  | 0.48                         | 0                          |
| COG1       | 1.19         | 3.94                   | 1.15         | 2.62                   | 0                  | 0.48                         | 0                          |
| CST26      | 0            | 3.94                   | 0            | 2.62                   | 0                  | 0.48                         | 0                          |
| RAD2       | 0            | 3.75                   | 0            | 2.55                   | 0                  | 0.48                         | 0                          |
| TAF13      | 0            | 3.94                   | 0            | 2.62                   | 0                  | 0.48                         | 0                          |
| BLM10      | 0            | 3.94                   | 0            | 2.62                   | 0                  | 0.48                         | 0                          |
| DEP1       | 0            | 3.94                   | 0            | 2.62                   | 0                  | 0.48                         | 1                          |
| ARV1       | 2.16         | 3.75                   | 1.54         | 2.55                   | 0                  | 0.48                         | 0                          |
| BOR1       | 0            | 3.94                   | 0            | 2.62                   | 0                  | 0.48                         | 0                          |



Table S8: Rtr1 WT and Rtr1 *ctk1Δ* SAINT analysis Page 23

| PROTEIN ID | RTR1 WT FC_A | RTR1 <i>ctk1Δ</i> FC_A | RTR1 WT FC_B | RTR1 <i>ctk1Δ</i> FC_B | RTR1 WT SAINT PROB | RTR1 <i>ctk1Δ</i> SAINT PROB | iREF (1=present, 0=absent) |
|------------|--------------|------------------------|--------------|------------------------|--------------------|------------------------------|----------------------------|
| RAD26      | 0            | 3.75                   | 0            | 2.55                   | 0                  | 0.48                         | 0                          |
| CCE1       | 0            | 3.75                   | 0            | 2.55                   | 0                  | 0.48                         | 0                          |
| YBL112C    | 0            | 3.75                   | 0            | 2.55                   | 0                  | 0.48                         | 0                          |
| DAL2       | 0            | 4.44                   | 0            | 2.08                   | 0                  | 0.48                         | 0                          |
| SHM2       | 1.18         | 8.09                   | 0.33         | 2.44                   | 0                  | 0.47                         | 0                          |
| RPL27B     | 0            | 7.11                   | 0            | 2.49                   | 0                  | 0.47                         | 0                          |
| CHS3       | 0            | 5.44                   | 0            | 2.21                   | 0                  | 0.46                         | 0                          |
| FOL2       | 0.36         | 6.06                   | 0.22         | 1.19                   | 0                  | 0.45                         | 0                          |
| PAM1       | 0            | 3.35                   | 0            | 1.87                   | 0                  | 0.4                          | 0                          |
| ARO3       | 0            | 3.35                   | 0            | 1.87                   | 0                  | 0.4                          | 0                          |
| NUP120     | 0            | 3.35                   | 0            | 1.86                   | 0                  | 0.4                          | 0                          |
| PHO90      | 0            | 3.57                   | 0            | 1.51                   | 0                  | 0.39                         | 0                          |
| RRS1       | 1.19         | 3.01                   | 0.84         | 1.53                   | 0                  | 0.32                         | 0                          |
| MPD2       | 2.71         | 5.33                   | 0.8          | 0.89                   | 0                  | 0.3                          | 0                          |
| CIT1       | 0.63         | 1.99                   | 0.4          | 0.89                   | 0                  | 0.27                         | 0                          |
| ARG5_6     | 0.61         | 3.46                   | 0.36         | 1.87                   | 0                  | 0.18                         | 0                          |
| RSN1       | 0            | 2.45                   | 0            | 1.08                   | 0                  | 0.16                         | 0                          |
| NGG1       | 0            | 2.4                    | 0            | 1.23                   | 0                  | 0.15                         | 0                          |
| PET123     | 0            | 3.43                   | 0            | 1.46                   | 0                  | 0.08                         | 0                          |
| RPS2       | 0.41         | 4.78                   | 0.11         | 0.41                   | 0                  | 0.08                         | 0                          |
| ERB1       | 0.39         | 3.71                   | 0.23         | 0.93                   | 0                  | 0.07                         | 0                          |
| RPL33A     | 0.18         | 5.27                   | 0.09         | 0.62                   | 0                  | 0.06                         | 0                          |
| RPL33B     | 0.21         | 4.27                   | 0.12         | 0.68                   | 0                  | 0.04                         | 0                          |
| ERG11      | 0            | 3.28                   | 0            | 0.68                   | 0                  | 0.03                         | 0                          |
| THI20      | 0.04         | 6.54                   | 0.02         | 0.3                    | 0                  | 0.03                         | 0                          |
| EMP24      | 0            | 1.64                   | 0            | 0.55                   | 0                  | 0.02                         | 0                          |
| RPT6       | 0.4          | 2.6                    | 0.18         | 0.54                   | 0                  | 0.01                         | 0                          |

Table S9: Yeast strains used in this study

| Strain name            | Genotype                                                                                | Reference(s)                          |
|------------------------|-----------------------------------------------------------------------------------------|---------------------------------------|
| BY4741                 | <i>MATa his3Δ leu2Δ met15Δ ura3Δ</i>                                                    | Ghaemmaghami, S, <i>et al.</i> (2003) |
| <i>rtr1Δ</i>           | <i>MATa his3Δ leu2Δ met15Δ ura3Δ</i><br><i>rtr1::KANMX6</i>                             | Winzeler, E, <i>et al</i> (1999)      |
| Rtr1-TAP WT            | <i>MATa his3Δ leu2Δ met15Δ ura3Δ</i> Rtr1-TAP:: <i>HIS3MX6</i>                          | Ghaemmaghami, S, <i>et al.</i> (2003) |
| Rtr1-TAP WT            | <i>MATa his3Δ leu2Δ met15Δ ura3Δ</i> Rtr1-TAP:: <i>URA3</i>                             | This study                            |
| Rtr1-TAP <i>ctk1Δ</i>  | <i>MATa his3Δ leu2Δ met15Δ ura3Δ</i> Rtr1-TAP:: <i>URA3 ctk1::KANMX6</i>                | This study                            |
| Rtr1-FLAG WT           | <i>MATa his3Δ leu2Δ met15Δ ura3Δ</i> Rtr1-FLAG:: <i>HIS3MX6</i>                         | This study                            |
| Rtr1-FLAG <i>ctk1Δ</i> | <i>MATa his3Δ leu2Δ met15Δ ura3Δ</i> Rtr1-FLAG:: <i>HIS3MX6 ctk1::KANMX6</i>            | This study                            |
| Rtr1-V5 WT             | <i>MATa his3Δ leu2Δ met15Δ ura3Δ</i> Rtr1-V5:: <i>HIS3MX6</i>                           | This study                            |
| Rpb3-TAP               | <i>MATa his3Δ leu2Δ met15Δ ura3Δ</i> Rpb3-TAP:: <i>HIS3MX6</i>                          | Ghaemmaghami, S, <i>et al.</i> (2003) |
| GPD-Rtr1-TAP WT        | <i>MATa his3Δ leu2Δ met15Δ ura3Δ</i> [pAG413GPD-Rtr1-TAP]                               | This study                            |
| GPD-Rtr1-TAP S217A     | <i>MATa his3Δ leu2Δ met15Δ ura3Δ</i> [pAG413GPD-Rtr1-S217A-TAP]                         | This study                            |
| GPD-Rtr1-TAP S217D     | <i>MATa his3Δ leu2Δ met15Δ ura3Δ</i> [pAG413GPD-Rtr1-S217D-TAP]                         | This study                            |
| Ctk1-TAP Rtr1-V5       | <i>MATa his3Δ leu2Δ met15Δ ura3Δ</i> Ctk1-TAP:: <i>HIS3MX6</i> Rtr1-V5:: <i>HIS3MX6</i> | This study                            |
